# Supplementary material for: The Identification Distinct Antiviral Factors Regulated Influenza Pandemic H1N1 Infection
Source: Int J Microbiol. 2024 Jan 9;2024:6631882. doi: 10.1155/2024/6631882 (PMC10791480; doi:10.1155/2024/6631882)
Supplement: Supplementary Materials — Supplementary data1: the DEG in A/California/04/2009 H1N1 infection. Supplementary data2: the DEG in two different strains of H1N1pdm09 (A/Jena/5258/09 and A/California/7/2009). Supplementary data3: the overlapped DEGs in all analysed datasets infected with H1N1pdm09 strains at 3dpi and 5dpi. Supplementary data4: H1N1pdm1918-induced DEGs. Supplementary data5: the DEGs induced by nH1N1pdm. [file 6631882.f1.zip]

Archive with 5 entries (5 files):
- Supplementary data 1.xlsx
- Supplementary data 2.xlsx
- Supplementary data 3.xlsx
- Supplementary data 4.xlsx
- Supplementary data 5.xlsx
