# Supplementary material for: The Identification Distinct Antiviral Factors Regulated Influenza Pandemic H1N1 Infection
Source: Int J Microbiol. 2024 Jan 9;2024:6631882. doi: 10.1155/2024/6631882 (PMC10791480; doi:10.1155/2024/6631882)
Supplement: Supplementary Materials — Supplementary data1: the DEG in A/California/04/2009 H1N1 infection. Supplementary data2: the DEG in two different strains of H1N1pdm09 (A/Jena/5258/09 and A/California/7/2009). Supplementary data3: the overlapped DEGs in all analysed datasets infected with H1N1pdm09 strains at 3dpi and 5dpi. Supplementary data4: H1N1pdm1918-induced DEGs. Supplementary data5: the DEGs induced by nH1N1pdm. [file 6631882.f1.zip › Supplementary data 1.xlsx]

## Sheet: GSE43764
3days					6days
ID	logFC	adj.P.Val			ID	logFC	adj.P.Val
Smox	1.10777	0.0496822			Pm20d2	-1.45201	0.0498747
Plg	-1.90739	0.0496822			Syn3	-1.71094	0.049546
AW549542	-1.57394	0.0496697			Abra	-1.12237	0.0495373
Insm1	-1.34871	0.0495779			Vsnl1	-1.90412	0.0492567
Ank1	-2.24401	0.0495506			Zfp560	-1.21651	0.0489791
Vmn1r168	-1.78794	0.0494626			4930538K18Rik	-1.49317	0.0489709
Txlnb	-2.89252	0.0493681			Gcet2	-1.97589	0.0485591
Actn2	-2.84198	0.0493652			E330020D12Rik	-1.18468	0.0482867
Il19	1.95718	0.0493586			Tdrd5	-1.19942	0.0482145
Fam171a2	-1.22256	0.0493486			Npy1r	-1.04377	0.0482035
Gm9758	1.0872	0.0493301			Slc5a7	-1.24607	0.0481575
Cmtm8	-1.40677	0.0490118			Zmat1	-1.16307	0.0481395
Mt4	1.50285	0.0490029			4921516I12Rik	-1.0799	0.047841
Ankrd5	-1.33894	0.0490029			Cyp2b13	-1.77425	0.0476883
Acoxl	-1.67204	0.048468			Zfp773	-1.14556	0.0476718
Fyb	1.03127	0.0483016			Fam83e	-1.40939	0.0472538
LOC640979	-1.95227	0.0480293			Slc25a42	-1.1019	0.0472042
Junb	1.15741	0.0477628			1700011F14Rik	-1.29041	0.0471496
Kntc1	1.01207	0.0475555			Tdrkh	-1.02158	0.0467073
Rab6b	-1.66964	0.0475091			Fam101a	-1.76413	0.0466601
Vmn1r174	-1.12147	0.0474662			Tmem179	-1.22742	0.0466354
Idi2	1.16379	0.0474118			Rabgap1	-1.51166	0.0465285
Cthrc1	-2.19531	0.0473209			Cnnm2	-1.06513	0.0462578
Gnat2	-1.13175	0.047314			Gm606	-2.50652	0.0462565
Lce1l	1.07415	0.0469937			Prosapip1	-1.02252	0.0461875
Foxa3	1.31138	0.0469237			LOC100504710	-1.62016	0.046053
C030039L03Rik	-1.46722	0.0469236			Rprml	-1.16411	0.0449434
Otop2	1.20279	0.0468045			Wdr27	-2.61899	0.0448559
Ltb4r1	1.10141	0.0467037			Olfr113	-2.21993	0.0447833
Tnni1	1.40906	0.0465578			Gal3st4	-1.82763	0.044548
Il10ra	1.12989	0.0465224			Ndrg2	-1.03627	0.0445091
Pbk	1.38751	0.046358			Shc4	-1.15025	0.0445091
9330175E14Rik	1.51813	0.046346			Hpcal4	-1.46576	0.0444095
Rab3a	-1.30686	0.0461623			Proca1	-1.09237	0.0439942
Stmn3	-1.36775	0.0461411			Slco4c1	-1.11996	0.043914
Smad9	-2.63538	0.0460188			2310067B10Rik	-1.73555	0.0431905
Gm5544	1.67888	0.0459455			Frs3	-1.18126	0.0430972
Tnni3	-2.51955	0.0458571			D930007P13Rik	-1.26424	0.0428837
Klk1b8	1.26308	0.0457451			Naip7	-1.06501	0.0427064
Paqr6	-1.47436	0.0456647			Vmn1r234	-1.24139	0.0425089
Tle2	-1.66927	0.0455161			Sdad1	-1.31424	0.0423264
Klk1b4	2.06236	0.0453787			C77370	-1.2174	0.0419702
Kcnn2	-2.74968	0.0453218			Foxp2	-1.12126	0.041871
Tmem213	1.52545	0.0453178			Gm4203	-1.80132	0.0418338
Nrbp2	-1.14969	0.0452798			Myh8	-1.58855	0.0418164
Kcnq1	-1.01347	0.0451431			Creb1	-1.28998	0.0414182
D430036J16Rik	-1.40171	0.0450853			Klra1	-1.59995	0.0411903
Sptlc3	-1.65261	0.0447427			Efcab9	-1.70981	0.0407673
E030019B13Rik	-1.58873	0.0446214			Shank2	-1.702	0.0406547
Cfd	-3.24462	0.0444478			R74862	-1.21942	0.0405525
Mdga1	-1.64036	0.0443026			Mccc2	-1.29126	0.0404345
C2cd4a	-1.05649	0.0442721			Olfr735	-1.42228	0.0402384
Spdef	-1.266	0.0439177			Tmem74	-1.42355	0.0401459
Emcn	-1.03576	0.0438934			Klhl10	-1.11153	0.039674
1700119I11Rik	1.37116	0.0438044			Tinag	-1.5122	0.0393991
Glipr2	1.03054	0.0436848			Aspn	-1.08482	0.0393991
Hbb-b2	-1.89901	0.043595			Nrxn1	-1.43722	0.0393991
Plscr4	-2.72314	0.0433762			Cyp2a4	-2.95023	0.0392179
Slc6a12	2.82169	0.0433136			H2-Ea-ps	-1.05765	0.0391647
Atp13a4	-1.44145	0.0432873			Gm1568	-1.30026	0.0391433
1810010H24Rik	-1.5234	0.0432725			Npr3	-1.06027	0.0391388
Defa-rs2	1.19536	0.0432332			BC030307	-1.67944	0.0391363
Olfr476	-1.0143	0.0431434			Pank1	-1.38631	0.038932
Zic4	-1.54903	0.0431125			Papolb	-1.0278	0.0388775
Gp1ba	1.36053	0.0431011			Defb28	-1.26072	0.0385766
Calm4	1.71765	0.0430247			Nup210	-1.03022	0.0381143
Dydc1	-1.95103	0.0429703			Igfbp3	-2.29559	0.03808
Fetub	-1.00729	0.0429578			Lrp2	-1.49026	0.0378065
Tgtp1	1.19677	0.0429263			Tdgf1	-1.58059	0.0377327
Syt17	-1.71573	0.0428569			Gm2568	-1.34148	0.0368674
Zfyve28	-1.27496	0.0428559			Adam28	-1.89668	0.0368674
Tpd52l1	-1.19559	0.0427986			Amz1	-1.26848	0.0367289
Pdlim3	-1.10598	0.0427835			Tbx6	-1.10833	0.0366574
Ptgfr	-1.5834	0.0427083			Gm10382	-1.0433	0.03628
S100g	-2.7388	0.0426755			Car11	-1.10527	0.0358964
Chadl	-1.06353	0.0424456			Gm5084	-1.67059	0.0356839
Agbl4	-1.43428	0.0424399			H2-Eb1	-1.42741	0.0356634
Akap4	1.98821	0.0424365			Cd209a	-4.31809	0.0355716
Dppa4	1.33859	0.0422598			Ribc2	-1.7457	0.035336
Serpina9	-1.16844	0.04203			Slc27a2	-1.98305	0.0352296
Angpt4	-2.22245	0.0419963			Il22ra2	-1.14151	0.0351259
Cd209c	-3.34156	0.0418843			Fam162b	-1.42354	0.0349391
Iqcf5	-1.17122	0.0418105			Chad	-3.00448	0.0349391
Casp1	1.1879	0.0417359			Olfr9	-1.59963	0.0348058
Itga5	1.39383	0.0416191			Cntnap2	-1.14519	0.0347646
Fam123a	1.1866	0.0415944			Rpgrip1l	-1.07148	0.0347264
Insl6	1.30938	0.0415885			A230057D06Rik	-3.23802	0.0347105
Ptn	-1.24711	0.0413997			Abca6	-1.01373	0.0347036
Pdzd7	-1.95741	0.0413637			Pign	-1.25515	0.0346322
Dlx5	1.13243	0.0413621			AU023762	-1.28484	0.0346021
Efnb3	1.08434	0.0412081			Gm70	-1.19671	0.0345719
Prss35	-1.02658	0.0411201			2022-03-04	-2.04947	0.0344706
Clvs1	-1.07644	0.0411159			Fabp12	-1.8065	0.0343811
Egr1	1.37373	0.0408837			Ddx25	-1.55991	0.0343641
Cntn6	-1.41776	0.04082			Chat	-1.1322	0.0341826
Cd163l1	-1.05212	0.0407029			Foxl1	-1.57398	0.034014
9130015G15Rik	-1.62667	0.0404736			Zfhx2	-1.4578	0.0337011
A930009A15Rik	1.27198	0.0403882			Slitrk6	-2.17862	0.0337011
Megf6	-1.42473	0.040372			Gnb3	-1.13289	0.0335944
Spic	1.13924	0.0403373			Nrg2	-2.34006	0.0333589
Olfr1396	2.14735	0.0403282			Clec3b	-1.61439	0.0333479
Gm7967	1.16771	0.0403282			Cox6a2	-1.37191	0.0331097
Ncf2	1.0047	0.0403044			Tmem200a	-1.42062	0.0331033
1700034O15Rik	-1.28358	0.0403044			Gsta2	-2.48658	0.033102
Vstm2b	-1.09549	0.0402052			Mfap3l	-1.31979	0.032961
Olfr735	-2.15884	0.0401853			Agtr1a	-1.18078	0.0329606
LOC100047210	-1.74241	0.0399915			Cyp2c37	-1.02614	0.0329301
Daf2	-1.22171	0.0399432			4930524E20Rik	-1.26588	0.0328484
Cygb	-1.39812	0.0397614			Tesc	-1.13649	0.0327981
Asb14	-2.1344	0.0397614			Dcaf12l2	-1.0974	0.0327729
Snora74a	1.00206	0.0393717			Pygo1	-1.14964	0.0327101
Prl3a1	1.25042	0.0393161			Gabra4	-1.20611	0.0327045
Pappa2	1.31371	0.0392583			Rassf10	-1.47254	0.0326542
Reep6	-1.17227	0.0392583			Ccna1	-2.63792	0.0322142
Cecr6	-1.52315	0.0391951			Rimkla	-1.38041	0.0321121
Myh8	-2.57311	0.0391907			Gdpd3	-1.0333	0.0316424
LOC639910	1.43717	0.0391699			Dll4	-1.24115	0.0316313
Deptor	-1.0703	0.0391699			Hbq1b	-1.22971	0.0315606
Slc7a4	-1.22947	0.0391694			Plscr4	-1.76209	0.0314732
Prg4	2.24469	0.0388552			Pabpc4l	-1.4845	0.0314032
Speer5-ps1	1.43468	0.0388318			Trp53bp2	-1.14272	0.0311292
Pglyrp1	1.09231	0.0388318			Cyp2a12	-1.19871	0.030937
Pbld2	-1.83116	0.0387862			Cd2	-1.15679	0.0309356
Cldn2	1.99588	0.0385484			Kcns3	-1.32112	0.0308862
Chst1	-1.08267	0.0385375			Plekha6	-1.55595	0.0308327
Klk6	1.30641	0.038512			Nr4a2	-1.13027	0.0307789
Lpar3	-1.59975	0.0385077			Tacr1	-1.34533	0.0305556
Gm3289	-1.21692	0.0384588			Ifltd1	-1.97551	0.0305197
4930548H24Rik	1.49804	0.0384586			Tnfrsf13c	-1.44612	0.0303999
Iqgap3	1.45335	0.0384278			Gm10848	-1.01387	0.0301967
Cldn8	-3.26994	0.0384278			Ntf3	-1.34791	0.0300906
Sec14l3	-1.7241	0.0383923			Arhgef4	-1.00677	0.0298655
Myl7	-3.42996	0.0382117			Twsg1	-1.08581	0.0297901
Gstt1	-1.49635	0.0380892			Aqp4	-1.60164	0.0297267
Reck	-1.1754	0.0379688			Gm2885	-1.0519	0.0296246
Slc23a1	-2.00494	0.037953			Sox14	-1.19576	0.0296069
Krt20	2.67715	0.0379184			Sema3g	-1.29582	0.0296054
Coch	2.29384	0.0377233			Acrbp	-1.3145	0.0296016
Car14	-1.07334	0.0374425			Sox7	-1.58832	0.029594
Tceal1	-1.39286	0.0372623			Olfr1097	-1.68267	0.0293735
Kcnj5	-2.14022	0.0370838			Fer1l4	-1.63323	0.0293498
Npr3	-1.89728	0.0370671			Fabp3	-1.1498	0.0293489
Dscaml1	1.31264	0.0370153			Mill2	-1.16122	0.0291634
Mid1ip1	-1.03465	0.0369935			Lpcat1	-1.09615	0.0291589
Cyyr1	-1.13282	0.0369935			Gm5215	-1.43926	0.0291504
Rbfox1	-1.74548	0.0369472			Slc6a17	-1.49253	0.0291327
Dcxr	-1.57124	0.0365818			Acsbg2	-1.05755	0.0290172
Ckm	-3.10794	0.0365064			Pla2g4f	-1.31991	0.0289953
Vmn1r18	-2.17948	0.0364878			Rad9b	-1.16673	0.0287871
Sh2d5	1.34623	0.0364693			Snap23	-1.30581	0.028724
Rtp3	-1.01633	0.0363382			Slc25a41	-1.48501	0.0287053
Lilra5	-1.14205	0.0362266			Zfp641	-1.01001	0.0286559
Mybphl	-2.71361	0.0361142			Optc	-1.5465	0.0285585
1700018A14Rik	1.03344	0.0361135			Glb1l2	-1.18928	0.0285283
4930579K19Rik	-1.55493	0.0361131			Gm6802	-1.1826	0.0284561
Orm3	1.54252	0.0359815			Rab27b	-1.00912	0.0284179
D17H6S56E-3	-1.31786	0.0359815			Mex3b	-1.40545	0.0281194
Gm11710	1.06833	0.0358727			EG654453	-1.43879	0.0280112
Cidec	-1.17262	0.0358082			E130308A19Rik	-1.30097	0.0277787
Matn2	-1.13551	0.0357599			S100a5	-1.07388	0.0277673
Prtn3	1.40315	0.0356182			Gdf9	-1.13265	0.0276535
Fgf1	-1.79174	0.0356112			LOC677484	-1.28985	0.0274679
Tnnt2	-1.96405	0.0351725			LOC100048725	-1.47046	0.0273237
Sycp2	1.62147	0.0351661			Cd300lf	-1.36595	0.0272899
Cdh17	1.11904	0.0351182			Wfdc10	-1.1941	0.0271262
Fgl2	1.58928	0.0350944			Zfp454	-1.24184	0.0270553
Gstk1	-1.13471	0.0350763			Gas2l2	-1.12833	0.0270378
Depdc7	1.42506	0.0349508			Olfr392	-1.1848	0.0267918
Flrt1	-2.02521	0.034756			BC049715	-1.27654	0.0266212
Edil3	-1.63863	0.0347548			S100z	-1.43513	0.0264798
Fam154a	2.52641	0.0347036			Tcf15	-1.79188	0.0262678
Nlrp1b	1.41137	0.0347036			Chrm1	-1.74541	0.0262678
Smad6	-1.0723	0.0347036			Zfp606	-1.19807	0.0260816
Cela1	1.52484	0.0346682			Ptpn13	-1.07992	0.0260493
Rhof	1.12328	0.0346403			C030037F17Rik	-1.36336	0.0259615
Sox2	-1.06351	0.0346403			Crebzf	-1.24982	0.0259143
Mmel1	-1.14719	0.0346403			Gpm6a	-1.20256	0.0258158
Cntd1	-1.18132	0.0346403			Rtp3	-1.31444	0.0256115
Idh2	-1.21823	0.0345591			Olfr870	-1.42829	0.0255496
Rhov	2.19935	0.0344936			Taar5	-1.11418	0.0255275
Col2a1	1.61662	0.034485			Lamp3	-1.37826	0.0254966
P2ry12	1.14956	0.0344363			Fam170b	-1.87644	0.0253319
Gm13375	-1.02072	0.0343885			Lix1	-1.31726	0.025235
Gpr15	2.41419	0.0341647			Ptpn3	-1.4896	0.025161
Pkp1	1.28145	0.0341513			Fos	-1.53075	0.0250925
Pydc3	1.00217	0.0341513			Cxcr4	-1.0139	0.0248993
Mylk4	-1.16538	0.0341496			Mfsd6l	-1.20133	0.0247376
Pllp	-1.25565	0.0341293			Trpm5	-2.4308	0.0247152
9430069I07Rik	1.12557	0.0341169			BC089597	-2.57877	0.0246568
Gpr98	-1.33055	0.0340963			Gpld1	-1.04068	0.0245968
Htra4	1.0553	0.0340148			Syt17	-1.7256	0.0245458
LOC675759	-1.36348	0.033721			Vstm2b	-1.51964	0.0244024
Avil	1.06723	0.0337161			Efhc2	-2.09559	0.0243879
Phex	-2.83259	0.0336151			Btg2	-1.11591	0.0242913
Pank1	-1.50398	0.0335178			Cpn1	-1.0138	0.0242128
Fmo2	-1.3729	0.033441			Fam19a1	-1.87293	0.0242017
D030018L15Rik	-1.19318	0.0333825			Tas2r126	-1.3213	0.0241752
Ankrd6	1.46487	0.0331874			P4ha1	-1.38475	0.0241329
Adad1	-1.01263	0.0330715			U46068	-2.43441	0.0240767
Ly6g6d	-1.59179	0.0328862			Ggcx	-1.12398	0.0240501
A230065H16Rik	-1.56593	0.0328821			Six5	-1.35893	0.0240239
Slc13a4	-1.90036	0.0327524			Stac	-1.17321	0.0239845
Faah	-1.04979	0.0326938			Wdr45l	-1.25121	0.0239572
Gm2848	1.69869	0.0325636			Abcc12	-1.33269	0.0239485
Ifna7	2.02144	0.0323951			Lhx6	-1.53766	0.023907
4933406C10Rik	-1.08786	0.0323951			Ang2	-1.04185	0.0238915
Gm14318	-1.17281	0.0322991			E4f1	-1.49818	0.0238108
Hbb-b1	-2.15741	0.0322395			Mxra8	-1.11345	0.0237154
Speer2	1.83629	0.0321259			C530008M17Rik	-2.20234	0.0236789
Ces2g	-1.22881	0.0319834			LOC630565	-1.4887	0.0236602
Crb2	1.72412	0.0319637			Purg	-1.02539	0.0235458
Hcrt	1.04575	0.031953			Wif1	-1.26856	0.023533
Efcab3	2.87356	0.031951			Zfp563	-1.56253	0.0234271
Wdr93	-1.73056	0.0317556			4930415O20Rik	-2.37076	0.0232945
D330050I16Rik	-1.02967	0.0317298			Pcdh18	-1.21881	0.0232733
Trav6d-3	-1.49609	0.0317298			Hist1h1d	-1.60447	0.0232541
Fasl	1.36543	0.0316957			Herc2	-1.54836	0.0231972
2810055F11Rik	-1.34096	0.031649			Rtkn2	-1.50502	0.0229977
Cyp39a1	-1.42664	0.0316302			Gm6811	-1.94809	0.0229704
Gpr171	1.18373	0.0316229			Tcfap2d	-1.27961	0.0228256
Asb4	2.96441	0.0315861			Gm711	-2.35325	0.0226152
5730508B09Rik	1.06743	0.0315575			Plxna3	-1.29614	0.0225705
Zmynd15	1.01263	0.0315575			Unc45b	-1.10223	0.0225098
Muc5b	-2.69806	0.0315134			Myb	-1.81372	0.0224657
Ldb3	-1.66561	0.0314492			Dyrk1b	-1.01463	0.0223649
Cd200r2	1.68495	0.0314326			Nr4a1	-1.55333	0.0223649
Sult1d1	-3.60334	0.0314326			Hdac11	-1.78481	0.0223258
Als2cr12	1.45972	0.031379			Slc8a3	-1.48853	0.0222505
Bdkrb2	1.53993	0.0312642			Ift88	-1.76591	0.0221974
Ltbp3	-1.08797	0.0312161			D2hgdh	-1.04986	0.0221564
Tbx3	-1.16169	0.0311827			Adamtsl1	-1.26173	0.0221033
Fam110c	1.01171	0.0311647			Kcnc3	-1.60198	0.0217569
Npy	1.74346	0.0311599			Zfp667	-1.18589	0.0216915
Cd300ld	1.31733	0.0311573			E030046B03Rik	-3.31768	0.0216465
Gm6654	1.00822	0.0311573			Nr2f1	-1.02357	0.021646
Fabp1	-3.25766	0.0311573			1700058C13Rik	-1.07973	0.0216361
Lin7b	1.77449	0.0311513			Hhip	-1.8677	0.0215594
Plekhh2	-1.36329	0.0311513			Sfrp4	-2.02847	0.0214689
Wisp1	1.32867	0.0311204			Cox6b2	-1.04215	0.0214672
Tyrobp	1.13244	0.0311038			Mgat3	-1.87028	0.0211278
Cxcr7	1.18917	0.0310885			Sema4g	-2.13241	0.0211207
9130208D14Rik	1.2322	0.0310754			Zfp763	-1.30281	0.0210976
Adam22	-2.39406	0.0309751			Gm10639	-2.34162	0.0209465
Ccr10	-1.13588	0.0309428			Lhx3	-1.63899	0.0208247
Thbs3	-2.09855	0.0309428			Zscan18	-1.12909	0.0208091
Rabgap1l	-1.18805	0.030913			Ces1f	-2.61544	0.0208091
Edn2	1.56086	0.0308947			Nphs2	-1.13454	0.020759
Hrc	-2.2406	0.0308011			Rp1	-1.97795	0.0207121
Gpr162	1.15825	0.0306443			Zscan30	-1.4851	0.0206339
Cd69	1.63436	0.0304552			A830010M20Rik	-1.01635	0.0205393
Psg17	2.00807	0.0304123			Ms4a1	-1.72529	0.0204933
Nap1l5	-2.38025	0.0303744			Tmprss5	-1.44819	0.0204898
Vgll1	1.49199	0.0303712			Bmp3	-1.62142	0.0204342
Irs1	-1.7223	0.0303196			Acbd7	-2.22135	0.0201935
Pilrb2	1.00479	0.0302724			Olfr821	-1.43094	0.0200683
Islr2	2.39977	0.030206			Cc2d2b	-1.54589	0.0199536
Carhsp1	1.02489	0.0301574			LOC100504262	-2.32929	0.019918
Tspan7	-1.27937	0.0301217			Cxcl15	-2.3	0.0198468
Sphkap	-1.54562	0.0301135			Pcdhb3	-1.1585	0.0196035
Mfap2	-1.18547	0.0300465			Olfr702	-1.29224	0.0196035
Ccrl2	1.27862	0.0300322			Grin2c	-2.96841	0.0195135
Vax2	1.09916	0.0300118			Gm821	-1.27069	0.0194205
Thsd1	-1.05665	0.0299286			Car14	-1.03204	0.0192465
E230025N22Rik	1.27207	0.0299267			Tspyl5	-1.9443	0.0192359
Tcp10a	1.12239	0.0298962			Celsr1	-1.16256	0.019223
Cox8b	-2.96808	0.02986			Fancc	-1.05308	0.019128
Ifng	2.21126	0.0297353			St6galnac1	-1.38815	0.0190296
Atp6v1c2	-1.75576	0.029593			Caps2	-2.95811	0.0190221
Foxi2	2.28066	0.0295787			Nox4	-1.1137	0.0190221
Fam78b	1.14223	0.0295135			Epha1	-1.16457	0.0189663
Olfr208	-2.72557	0.0294545			Tbx22	-1.69945	0.0189154
C2cd4b	-1.55279	0.0293912			Gm10050	-1.75004	0.0188226
Txnrd3	-1.08752	0.0293807			Dusp26	-2.50446	0.0188163
Apob	-1.92092	0.029364			Fbxo16	-1.44767	0.0185395
Ccr9	1.09175	0.0292221			Vmn2r58	-2.01456	0.0185322
9830107B12Rik	1.19869	0.029162			5430405H02Rik	-1.09998	0.0184458
Mlxipl	-1.41875	0.0291225			Rapgefl1	-1.07328	0.0183562
Zscan4c	1.06112	0.0290747			9130230L23Rik	-1.24789	0.0182587
Apln	-1.7842	0.0290162			Cdh5	-1.10679	0.0182482
Wee1	1.20856	0.0289846			Tlr11	-2.28577	0.0182412
1700018F24Rik	-1.12516	0.028943			Ccdc89	-1.09793	0.0182077
Grin2c	-2.30647	0.0289325			Edil3	-1.28895	0.0181852
Hspa12b	-1.09875	0.0288775			LOC100045292	-1.82674	0.0181673
Lancl3	1.85363	0.0288364			Inpp4b	-1.76099	0.0180944
LOC319689	-1.00042	0.0288204			5330437I02Rik	-1.33597	0.0178861
Eme1	1.24705	0.0287384			4933432B09Rik	-1.33468	0.0178414
Sema4d	1.15941	0.0287384			Tmod4	-1.45808	0.0177978
Gdf10	-2.59923	0.0287232			Olah	-1.25063	0.0177546
Fpr2	1.33463	0.0287142			Gas6	-1.28948	0.0177371
Gpc3	-1.62243	0.0286271			Meox2	-1.14569	0.0177174
Hist1h1a	1.20144	0.0285874			Catsper3	-1.22228	0.0177009
Tssk3	1.57292	0.0285785			Calr4	-2.25384	0.0175882
Arsi	1.72455	0.0285424			Cxxc4	-1.70981	0.0175599
Ckmt2	-4.12869	0.0285144			Pou2af1	-1.41394	0.0175145
Prkcz	-1.33863	0.0284879			Matn4	-1.10812	0.0174407
Prokr1	1.69429	0.0284105			Sfxn4	-1.46283	0.0174123
Sema3g	-1.03463	0.028398			Eif2s3y	-3.66425	0.0173541
Wfdc10	-1.74871	0.0283518			Ptprd	-1.12575	0.0173384
Olfr1444	1.83356	0.02835			Ptchd1	-1.76778	0.0173197
Cysltr2	1.6154	0.0282974			Rhpn1	-1.10072	0.017168
Mrap	2.00605	0.028292			Slc34a2	-1.6724	0.0171026
Fhit	-2.03909	0.028234			Cdkn1b	-1.07161	0.0169513
Il2rb	1.10981	0.0281604			Gm4221	-1.00346	0.016791
D630039A03Rik	-1.82198	0.0280308			Chi3l1	-1.57709	0.016791
BC039771	-1.38887	0.0280103			Zfp40	-1.11554	0.0167605
Gm15762	-1.77364	0.0279481			Ptpn5	-2.62234	0.0167162
Rpl39l	2.06087	0.0278728			Cacna2d4	-1.23498	0.0167076
Syt3	-1.66603	0.0278502			Zfp750	-1.19982	0.0167022
Crispld1	-1.68454	0.0278502			Cntd1	-1.4944	0.0166685
LOC100216343	1.16705	0.0278353			1810059H22Rik	-1.40941	0.0166155
Crhr2	-1.10978	0.0278256			Art4	-1.92247	0.0166067
Serpina7	2.39278	0.0276811			Pdzrn3	-1.01172	0.0165919
Efnb2	-1.15147	0.0275387			Gm14207	-1.74841	0.0165789
Galnt5	-2.15385	0.0275336			Slc25a27	-1.61322	0.0165034
Abtb2	1.24619	0.0275107			Prss58	-1.37294	0.0164744
Ttc30a2	-1.24302	0.0274955			Slc9a3r2	-1.22529	0.0163574
2610005M20Rik	1.54705	0.0274491			Spaca3	-1.45805	0.0163474
Daam2	-1.1962	0.0274277			Notch4	-1.46071	0.0162251
Lipg	1.30397	0.0274104			Naalad2	-1.44962	0.0161887
Acvrl1	-1.00233	0.0274104			Atp8b5	-2.73916	0.0161436
Bex2	-2.67279	0.0274057			C6	-1.84265	0.0161374
Ndst4	-1.35815	0.0273341			Apobec4	-2.01206	0.0161374
U46068	-3.26372	0.0272999			Samd12	-2.41362	0.0161173
Col6a4	-1.33262	0.0272847			Tceal3	-1.29039	0.0161148
Clec5a	1.01969	0.0272833			Lyz2	-1.14964	0.0161138
BC051628	-1.03308	0.0271976			Sftpa1	-1.98203	0.0161124
Sdc3	1.27504	0.0271581			Slc17a5	-1.488	0.0160159
Il17ra	1.02192	0.0270925			Defb6	-2.51721	0.0159185
Rad54b	1.81219	0.0270793			BC042761	-1.47639	0.0158902
Scgb1c1	-2.41628	0.0270197			2410137M14Rik	-1.45091	0.0158713
Tst	-1.12535	0.0269024			Slc14a1	-1.92921	0.0158455
Gpt	-1.56212	0.0269024			Ahnak	-1.38541	0.0158301
Gba	1.00496	0.0268793			LOC639316	-2.4516	0.0158143
Hrsp12	-1.22935	0.0268751			Slc25a35	-1.20094	0.0156956
Olfr46	-1.24515	0.0268551			Zfp879	-1.80888	0.0156916
Cd300c	1.29244	0.0266357			Uox	-2.66922	0.0156916
Bex1	-1.73209	0.0266054			Rassf6	-1.05873	0.0155
Relt	1.09015	0.0265123			Igsf10	-1.77113	0.0154892
Tmem110	-1.13117	0.0265103			Spdef	-1.50634	0.0154892
Slc8a3	-1.39421	0.026508			Arhgap20	-1.11706	0.0154361
Vsig1	-1.51453	0.0264852			Slc26a10	-2.15479	0.0153942
Cd86	1.48453	0.0264413			Krt222	-1.40493	0.0152547
Fcamr	1.4549	0.0264143			Col19a1	-1.86533	0.0151736
2610528A11Rik	3.13504	0.0263473			Lrp2bp	-1.30636	0.0151295
Tifab	1.28948	0.0263056			Aff3	-1.11954	0.015115
Tmem200b	-1.29066	0.0263056			A030003K21Rik	-1.57084	0.0151117
Cited4	1.07988	0.0262981			2810030D12Rik	-1.2175	0.0150552
Gstt3	-1.29453	0.0262452			Cst13	-1.08859	0.0149806
Tmem202	1.07886	0.0262238			Gm7969	-1.4337	0.0148969
Defa3	1.19708	0.0261305			Itgam	-1.32743	0.0148926
2610318N02Rik	1.43815	0.0260941			Gucy1a3	-1.63201	0.0148033
5830408C22Rik	-1.20352	0.0260784			Txnrd3	-1.02429	0.0147972
Enpp3	-1.14382	0.0260438			Prps2	-1.18283	0.0147454
Itln1	1.18749	0.0257949			Anpep	-1.18362	0.0147411
Slamf8	1.41553	0.0257729			Sox2	-1.68021	0.0147316
2210411A11Rik	-1.06944	0.0257585			Galt	-1.01508	0.0146376
Hyal1	-1.05345	0.0255067			C630004L07Rik	-1.98768	0.0146004
4921506M07Rik	-1.56994	0.0255067			Pllp	-1.50039	0.0145693
Man1a	-1.12446	0.025438			Gm6320	-1.47585	0.0145328
Slc29a3	1.53915	0.025432			Amt	-1.66909	0.0145175
Ngb	-1.73902	0.025432			Ggt6	-1.43983	0.0144882
Zar1l	1.35117	0.0254313			Ar	-1.08998	0.0144658
Olfr434	-1.0409	0.0254226			Cyp2d10	-1.00373	0.0144595
Pspn	1.08178	0.0254035			Scn3b	-1.65841	0.0144492
Olfr1107	1.60821	0.0254028			Cntn4	-1.53806	0.0144076
Chl1	2.32105	0.025391			Gm14166	-2.47707	0.0143741
Camp	1.27226	0.0252782			Cd209b	-1.44638	0.0143545
Rpp25	1.63892	0.025272			BC039771	-1.45584	0.0143505
Sncb	1.06404	0.0251275			Car15	-1.07341	0.0143505
Mark1	1.00418	0.0250929			Tmem100	-1.05907	0.01434
Clec4g	-1.19402	0.0250748			Cdh22	-1.35458	0.0143227
R74862	-1.18607	0.0250704			Mak	-1.12831	0.0143227
Kif13a	-1.00512	0.0250557			Pigz	-1.37167	0.0142484
Dapk1	-1.16229	0.0250202			Siglec5	-1.39065	0.0142211
Atp1a4	-1.37959	0.0250202			2210039B01Rik	-1.87569	0.0142126
Plunc	-6.87846	0.0250202			Plg	-1.04908	0.0142076
Zfp647	-1.04996	0.0249879			Emid1	-1.35527	0.0140874
Tspan15	-1.08148	0.0249357			2810410L24Rik	-1.29583	0.0140844
Gm13927	-1.56643	0.0249357			Snap25	-1.39581	0.0140625
4930447J18Rik	1.10808	0.0249321			Agtr1b	-1.87439	0.014043
Acot4	1.46065	0.0248604			Ephb1	-2.11398	0.0140387
LOC100046359	-1.83425	0.024766			Plcxd3	-1.65964	0.0140068
Dbh	-1.17627	0.0247153			Marveld1	-1.03067	0.0138892
Tppp	-2.10296	0.0246902			Pdgfd	-1.05345	0.0138727
Efhc2	-1.34403	0.0246644			Mdm1	-1.04856	0.0138479
Hadh	-1.26271	0.0246607			Gja6	-1.97287	0.0138043
Ndp	-1.64953	0.0246601			Cars2	-1.051	0.0137957
Ptgds	-1.01365	0.0246033			Idua	-1.45727	0.0137952
Sfpi1	1.63286	0.024591			C030039L03Rik	-2.18443	0.013721
Zbtb16	1.84443	0.0245847			Fam184a	-1.53752	0.0136521
Shcbp1	1.39236	0.0245553			Lyplal1	-1.02702	0.0136458
Epas1	-1.32094	0.0245421			2900006K08Rik	-1.75318	0.0135964
Spry4	1.64797	0.0244814			Zfp663	-1.45258	0.0135545
Ptprv	-1.21324	0.0244791			6030458C11Rik	-1.32968	0.01352
1110050K14Rik	-1.05889	0.0244509			Espn	-2.20513	0.01352
Bves	-1.79438	0.0244509			Adam18	-2.84015	0.0135184
Ifi203	1.41302	0.0243947			Adamdec1	-1.27721	0.0134755
Nap1l3	-1.29446	0.024372			Sema4f	-1.66086	0.0134011
Pnpla7	1.16907	0.0243435			Ang	-1.25464	0.0133861
BC030307	-1.04433	0.0243435			8430426J06Rik	-2.18754	0.0133551
Lrp2bp	-1.22405	0.0243435			Bank1	-1.82389	0.0133508
Hc	-3.01329	0.0243376			Mlxipl	-1.79771	0.0133354
Klk1b11	3.41682	0.0243195			2022-03-01	-1.51274	0.0131684
Il20rb	1.15405	0.0243091			Gm9959	-1.12386	0.0131684
Gfra1	-1.07411	0.0243049			Npas2	-2.4451	0.0131655
Cyp27a1	-1.70197	0.0242731			BC053749	-1.44025	0.0131637
Vav1	1.10891	0.0242186			4922501L14Rik	-2.37073	0.0131154
Gm13960	-1.94617	0.0241766			Ang3	-1.03913	0.0131071
Trim63	-2.73126	0.0239611			Sspo	-2.88825	0.0130955
Sort1	-1.45005	0.0239271			Lrrc4c	-1.22834	0.0130955
1700027A23Rik	-1.08196	0.0239089			Fat4	-1.11694	0.0130672
H2-M5	-1.47115	0.0239089			Gm5144	-2.0882	0.0130307
Ankrd7	1.59429	0.0239088			Zfp395	-1.19251	0.0129914
Myrip	1.53531	0.0238845			9530091C08Rik	-2.58004	0.0129883
Vwf	-1.31735	0.0237316			Dpep1	-1.66054	0.0129496
Bcl6b	1.10682	0.0236868			Vipr2	-1.92312	0.0129045
Treml2	1.55675	0.0235964			Maneal	-1.0902	0.0128889
Gm381	1.0617	0.0235961			Mfng	-1.05385	0.0128522
F5	1.45589	0.0235693			Epha8	-1.54113	0.012843
Gm12185	1.95549	0.0233643			Lrat	-2.46611	0.0127798
Timeless	1.06262	0.0233528			Ing2	-1.45228	0.0127526
Ccr2	1.02864	0.0233291			Hnmt	-1.20723	0.0127401
Aldh1a7	-1.86547	0.0233291			Rab36	-1.65439	0.0127247
1700123I01Rik	1.92533	0.0232565			Fhod1	-1.01755	0.0127178
Chga	1.18486	0.0232514			1110050K14Rik	-1.22691	0.0126929
LOC100046023	-1.25509	0.0232514			Fgf23	-1.48358	0.0126847
Pydc4	1.73114	0.0232329			Rbpjl	-1.80671	0.0126695
Ncf4	1.24012	0.023213			Tmem44	-1.04548	0.0126571
Dusp28	1.01055	0.0232088			Gm6936	-1.06507	0.0125854
Wdr27	-1.21061	0.0232088			Adcy8	-1.55563	0.0125792
Gm5144	-2.47688	0.0231995			Sntg2	-2.02136	0.0125564
Npr2	-1.00633	0.0230851			Gm14744	-2.00217	0.0125436
Fam71d	1.72708	0.0230276			Cdk5	-1.23403	0.012542
Gm281	-1.0192	0.0230015			Gm347	-1.09405	0.0125002
1600014C10Rik	1.14881	0.0229949			Zfp456	-1.0871	0.0124587
Gtf2i	-1.11261	0.0229949			Vmn2r35	-2.06034	0.0124313
Olfr907	1.03288	0.0228252			Fam107a	-1.21011	0.0124145
AU015836	-1.18908	0.0227967			Hc	-3.8953	0.0124034
Agphd1	-1.69845	0.0227903			1700018F24Rik	-2.0887	0.0123877
8430432A02Rik	-1.78123	0.0227903			Irx2	-1.15013	0.0123639
Kcnj13	-1.90498	0.0227722			Traf1	-2.0736	0.0122609
Cd72	1.41229	0.0227623			Mesp1	-3.38673	0.0122321
Twist1	1.26932	0.0227185			4932418E24Rik	-2.13116	0.0122258
Car8	-2.23005	0.02271			Hexim2	-1.53238	0.0122221
Tmem201	-1.97899	0.0226375			Gli1	-1.35252	0.0122061
Cpa1	-1.21568	0.0226127			Agphd1	-1.51816	0.0121684
LOC630565	-2.25825	0.0226127			Pdcd4	-1.48459	0.0121431
Serpina3g	1.95148	0.0226037			Cldn22	-3.05747	0.0121206
Mcc	-1.0766	0.0226033			Tmem136	-1.72109	0.0121197
Chrdl1	-2.79353	0.0225949			Pik3r3	-1.01621	0.0120744
Gm11758	1.14042	0.022593			4933430H15Rik	-1.79786	0.0120541
Sh3pxd2b	1.03707	0.0225657			Rasl11a	-1.20681	0.0120083
Defb6	-2.52682	0.0225568			Zcchc12	-1.08721	0.0119648
Gm1123	1.45616	0.0225085			Atl1	-1.0135	0.0119497
Hpse	1.51865	0.0224611			A830093I24Rik	-1.35061	0.0118262
Mtnr1b	-1.02424	0.0223745			Etv1	-1.29133	0.0117765
Mmp19	1.68621	0.0223523			Crabp1	-1.09491	0.0116538
Cd109	1.2411	0.0223363			Zfp874b	-1.14866	0.0115981
Sema6a	-1.4665	0.0222552			Nudt13	-1.0297	0.0115537
Pbp2	3.48564	0.0222056			Fbln1	-1.91795	0.0114601
Fabp3	-1.78058	0.0222056			Ndufa4l2	-1.36561	0.0114143
Slc4a5	-2.35882	0.0221274			Neil2	-1.38873	0.0113966
Gfi1b	1.42276	0.0221197			Vldlr	-1.02852	0.0113952
Tmprss2	-1.38786	0.0221197			Adck3	-1.47314	0.0113952
Car3	-4.38319	0.0220977			Ttpa	-2.36786	0.0113647
Fgfr3	-1.03017	0.0220896			Nkain4	-1.56655	0.0113356
Dhfr	1.11881	0.0220445			A530020G20Rik	-1.88606	0.0113079
Nr4a3	2.34415	0.0220409			St8sia2	-1.32863	0.0112144
Dpep1	-1.06615	0.0220165			Gc	-2.13781	0.0112132
Tac1	4.88728	0.0219612			Tmeff2	-1.95197	0.0112081
Sytl2	-1.86377	0.0219612			Cpn2	-1.58868	0.0111936
Thbd	-1.08869	0.0219237			Bcan	-4.31898	0.0111866
Cux2	-1.44981	0.0218416			Tbx2	-1.00327	0.0111767
Baalc	-1.08201	0.0218119			1110017F19Rik	-1.7478	0.011118
Hs6st3	-1.94212	0.0217759			Rtn2	-1.53813	0.0111155
D330025C20Rik	1.30445	0.0217252			Wdr54	-1.06451	0.0111155
Cbfa2t3	-1.19082	0.0217231			Fzd7	-1.462	0.0111155
E230012P03	-1.07526	0.0217036			Omd	-3.20054	0.0111155
Speer4f	1.28476	0.021643			Tmem50b	-1.30063	0.0111027
Cyp51	1.38315	0.0215912			Gsta4	-1.34821	0.011091
E030010N08Rik	-2.54515	0.0215882			4933406C10Rik	-1.18715	0.0110828
Gata1	1.43004	0.0215659			Cd209g	-2.03799	0.0110828
Sepp1	-1.25486	0.02156			Galnt5	-1.65233	0.0110755
Ccl24	2.00062	0.0215477			Atp1a2	-1.90634	0.0110491
Aoah	1.59566	0.0215365			Atp1b2	-1.33933	0.0109975
Vmn2r58	-1.38457	0.0215304			Grem2	-1.13751	0.0109733
Bmf	-1.33276	0.0215225			2700012I20Rik	-1.18469	0.0109236
Casq2	-2.93292	0.0214404			Ccl27a	-2.95499	0.0109102
Cenpm	2.32379	0.0214152			Slurp1	-2.18657	0.0109082
Cckar	-2.41113	0.0214038			Pgm5	-1.00897	0.0108302
C1qtnf7	-1.51723	0.0213915			Cox7a1	-1.62096	0.0108165
Il5	-1.289	0.0213682			Ralgapa1	-1.01763	0.0107741
5430425K12Rik	-1.50991	0.0213343			Tcf21	-1.45528	0.0107736
Zp1	-2.09627	0.0213343			Thnsl1	-1.23484	0.0107132
Fndc5	-1.97577	0.0213304			Itga1	-1.3924	0.010691
LOC100047671	-1.47192	0.0211362			Sort1	-1.10149	0.0106341
LOC100047133	1.60765	0.0211205			D830031N03Rik	-1.38501	0.0105948
Cyp4a12b	-1.91011	0.0210297			Tacr2	-1.45132	0.01054
Mslnl	1.94806	0.0209992			2310057J16Rik	-1.16328	0.0105351
Mcpt2	-1.67224	0.0209643			Shisa2	-3.884	0.0104975
Pram1	1.87357	0.0209621			2610507I01Rik	-1.72044	0.0104923
Chrm3	1.2823	0.0209448			Zfp712	-1.16973	0.0104795
LOC100505038	2.13637	0.0208787			Wscd2	-1.49428	0.0104468
Serpina3a	-2.8381	0.0208519			Nsun7	-2.65089	0.0104242
Disp2	1.36342	0.0207611			Cbx7	-1.84642	0.0103887
Ifi27l1	-1.17845	0.0207611			Myom3	-1.70611	0.0103482
Ugt8a	-1.21428	0.0207611			Sts	-1.06608	0.01033
Stard8	-1.21076	0.0207405			Gimap8	-1.27965	0.0103234
Cyp4a12a	-2.54315	0.0207257			Bex1	-2.3031	0.0103231
Il18rap	1.32142	0.0207006			6330403K07Rik	-2.56227	0.0103164
Gal3st4	-1.44268	0.0206898			Zfp579	-1.04814	0.0103009
Bmpr1b	-1.66466	0.020619			Fat3	-1.34035	0.0102447
Sln	-3.94353	0.020601			Kctd16	-1.48635	0.0102334
Gpr85	1.11755	0.0204667			LOC100502627	-1.18876	0.0102071
Gm3552	-1.61441	0.02045			Iyd	-1.73482	0.0102071
Tmem100	-1.4063	0.0204314			Apoc1	-1.14311	0.0101678
A230057D06Rik	-3.14092	0.0204304			Pcdh12	-2.11698	0.0100909
Gm3881	1.26428	0.0204258			A830018L16Rik	-1.59718	0.0100318
Vmac	-1.08418	0.0204216			Tie1	-1.49744	0.0100097
Scnn1g	1.20197	0.0203337			Ppp1r14d	-1.12639	0.00998717
Fmo5	-1.59545	0.0203337			Clec4g	-2.00624	0.00997009
2310046K23Rik	-1.15815	0.0203275			Cplx1	-1.05759	0.00993272
Gm2149	-2.49608	0.0203274			Lyz1	-1.66395	0.00984257
Tmem132a	-1.07872	0.0203173			Slc12a5	-1.82534	0.00980421
E2f8	2.06471	0.020289			Slc16a7	-1.32498	0.00972056
Ptk6	1.52624	0.020289			Cx3cl1	-1.6026	0.00969993
Rgs22	-1.65993	0.0202697			Proc	-1.40732	0.0096627
3110001I22Rik	1.50583	0.0202516			Ankfn1	-1.9557	0.00964387
Cldn10	-1.92864	0.0202516			Pitpnc1	-1.25667	0.00963886
Hmx3	1.23785	0.0202463			Sema3c	-1.33531	0.00960607
Plekhg5	-1.08806	0.020242			Scube2	-2.49107	0.00956506
Bglap-rs1	1.01068	0.0202231			Klhdc9	-2.3042	0.00951669
Olfr1442	-1.20878	0.0202015			Agbl4	-1.06663	0.00946025
Glod5	2.19559	0.0201583			Adam3	-1.54913	0.00939942
Fmn1	1.2024	0.0201583			Gm525	-1.94645	0.00939942
Olfr1312	-1.02648	0.0201397			Gm3364	-1.24945	0.00934946
Rps6ka6	-1.15671	0.0201171			Npnt	-1.19305	0.00933154
Tubb1	1.39327	0.0201158			Il2	-1.32272	0.00922688
Nhlrc4	-1.15805	0.02009			Ntng1	-1.9212	0.00920571
Acta1	-1.04443	0.0200557			Pax5	-2.37658	0.00920327
Adam32	1.10299	0.019959			D330028D13Rik	-1.11536	0.00918697
Tns1	-1.0974	0.019959			Lgi3	-2.85986	0.00918127
Cpsf4l	1.85049	0.0199558			Ccdc163	-1.23576	0.00916938
Bhlha15	1.16154	0.0198873			Tmem194b	-1.42786	0.00915253
Gm3331	-1.79101	0.0198826			Hspa2	-1.05697	0.00913437
Adcyap1r1	-1.61035	0.0198794			Mcee	-1.48668	0.00912603
Notch4	-1.20223	0.0198793			Lrrc4b	-1.06673	0.00909883
A730049H05Rik	2.07418	0.0198741			D4Wsu53e	-1.42632	0.00909709
Alppl2	-1.14796	0.0198413			2610203C22Rik	-1.89837	0.00909115
Slc26a4	2.77606	0.0198184			Zfp760	-1.36098	0.00908893
Cald1	1.00633	0.0198184			Phkb	-1.00273	0.00907563
Psg27	-1.02255	0.0198134			Plvap	-1.21623	0.00905217
Higd1b	-1.23898	0.0198134			Triobp	-1.04728	0.00902671
Slc1a3	-1.00996	0.0197028			Prelp	-1.6676	0.00900853
Bcl11a	-1.028	0.019545			Bmpr1b	-1.69645	0.00896386
Trf	-1.29181	0.0195186			Pbld2	-1.95521	0.00894542
Neurl2	-1.09622	0.0195097			9330129D05Rik	-1.51803	0.00891283
Tmem233	-1.5869	0.0195097			Hgfac	-1.07353	0.0089048
Mapk10	-2.63277	0.0195097			Ang4	-1.36076	0.0088981
Tlr1	1.14837	0.019424			Gm4107	-1.10504	0.00888498
Fn3k	-3.12321	0.0194136			Dock4	-1.26028	0.00884439
Pcdhac2	-2.27348	0.0194117			Fcrla	-1.33029	0.00883794
Gm4131	1.60963	0.0193861			Myo5c	-1.61115	0.0088287
Ccl11	1.1345	0.0193861			Best3	-1.36295	0.00881975
Cd59a	-1.06625	0.0193861			Spnb3	-1.1585	0.00880006
Magix	-2.95668	0.0193729			Myh10	-1.10902	0.00878404
Cabp2	-1.02695	0.0193412			Efcab1	-2.03107	0.00878106
Inmt	-2.59524	0.0193095			Nap1l3	-2.03014	0.00877488
Gpr114	1.47326	0.0192753			Rnf43	-1.15418	0.0087416
Tceal6	-1.49366	0.0192155			Acox2	-1.47249	0.0087416
Aox1	-1.24329	0.0191088			Acvrl1	-1.97758	0.0087416
Kcne3	-1.1853	0.0191056			Tob1	-1.16995	0.00872833
Ttll13	-1.40161	0.019054			H2-Oa	-1.18339	0.00871099
Tnfaip2	1.0823	0.0190466			Tbata	-1.0152	0.00863174
Ldhb	-2.09424	0.0190466			Morn2	-1.28906	0.00860704
Dync1i1	2.193	0.0190154			Pxmp4	-1.03271	0.00858533
Egflam	-1.20091	0.018972			Hnrnph3	-2.65872	0.00857819
Fgf9	1.56309	0.0189453			St6galnac2	-1.19848	0.00856609
LOC675594	3.44374	0.0189353			Sh3tc2	-1.19662	0.0085576
Rel	1.46375	0.0189274			Rnf144a	-1.10624	0.0085441
Ltk	-1.27679	0.0189124			Prom1	-1.11804	0.00849177
Il3ra	1.04204	0.018904			2310010J17Rik	-1.104	0.00846152
Raet1a	1.97208	0.0188855			Paqr6	-1.09132	0.00845005
Myoc	-1.25559	0.0188627			Pla2g1b	-2.79429	0.00842504
Cd200r4	1.69771	0.018857			Slc26a9	-2.36285	0.00841993
Irf5	1.52046	0.0188364			Ugt1a6a	-1.12748	0.00839688
Gm16697	-1.7691	0.0188324			Colec11	-1.22817	0.00839243
Arap3	-1.25679	0.0187905			Nr3c2	-1.36069	0.00837914
Ednrb	-2.07641	0.0187894			Ltk	-2.0676	0.00835733
Gpihbp1	-1.4087	0.0187823			Mlc1	-1.54806	0.00834972
Gm711	-2.01299	0.0187332			Gucy1b3	-1.19724	0.0083111
Grik2	-1.02366	0.0187314			Wfdc1	-1.19882	0.00828405
Gm5820	-1.44568	0.0187204			Pex6	-1.43078	0.00823468
Tmem195	-1.00532	0.0186848			Chrdl1	-2.07173	0.00822307
LOC677484	-1.5477	0.0186663			9530026P05Rik	-4.6241	0.00821563
Plekhn1	1.24056	0.0186594			Traf3ip1	-1.36644	0.00820746
Aard	-1.92441	0.0186175			Lrrc14b	-1.68862	0.00818067
Srrm4	1.27247	0.018613			Thrsp	-2.27305	0.00817802
Kazald1	-1.99869	0.0185626			Gabra2	-1.39078	0.00816173
Wdr72	-2.22618	0.0185105			Gm904	-2.46239	0.00815524
4931423N10Rik	2.41738	0.0185083			Runx1t1	-1.18554	0.00812679
Dmrtc1a	1.63541	0.0185074			Gm4076	-1.30822	0.00808336
Dkk2	1.73932	0.0185027			Mmaa	-1.24148	0.00804009
Pycr1	1.37549	0.0185005			Cr2	-2.73794	0.00803443
Myb	-1.20203	0.0184201			Cmya5	-1.65363	0.00803031
Gpr34	-2.01885	0.0184193			Tanc2	-1.21689	0.00802448
Cox7a1	-2.32557	0.0183961			2210011C24Rik	-1.25769	0.00802289
Ugt1a10	1.39713	0.0183921			Cebpa	-1.03644	0.00802245
Ccdc36	2.15094	0.0183555			Ccdc15	-1.75118	0.00802017
Hsd11b2	1.87076	0.0183518			Zbbx	-1.3756	0.0080128
Wscd1	-1.75564	0.0183012			Tspan18	-2.08953	0.00798331
Gpr133	1.55601	0.0182744			Fam38b	-1.4594	0.00795723
Cbx6	-1.26628	0.0182132			Fabp1	-3.18143	0.0079557
Grem1	1.47088	0.0181358			Gabbr2	-1.43115	0.0079557
Spocd1	1.71374	0.0180927			Lmo2	-1.06511	0.00792731
Prl6a1	1.38855	0.0180753			Cyb5rl	-1.28067	0.00784978
Klra9	1.35046	0.0180443			Akr1c19	-1.97063	0.00783537
Nos1	-1.16718	0.0180056			4933409K07Rik	-1.71932	0.00781565
Astn1	1.2876	0.0179724			Lgals12	-1.32036	0.00776273
Slc25a41	-1.38846	0.0179116			Rgs9	-2.1435	0.00771688
Mccc2	-1.02389	0.0178779			Ppp1r13b	-1.00524	0.00769167
Bach2	-1.27573	0.0178636			Trpc3	-2.07095	0.00769167
Abcg5	-1.79018	0.0178477			Mtss1l	-1.83004	0.00767512
Masp1	1.28279	0.0177513			Antxr1	-1.58117	0.00767512
D930020E02Rik	-1.13889	0.0177016			Ctsf	-1.62879	0.00767512
Pou4f1	1.56295	0.0176944			Fbln7	-1.71045	0.00767164
Kcnip4	-2.39463	0.0176898			Cux2	-3.07811	0.00766081
Bhlhe41	1.80324	0.0176509			Calcoco1	-1.41807	0.00765546
Dao	2.23411	0.0176405			BC021891	-1.58875	0.00765546
Capsl	-1.15594	0.0176116			Cyp4v3	-1.17355	0.00764243
Fign	-1.37818	0.0176116			Angpt1	-1.28336	0.00763832
Guk1	-1.02016	0.0175989			A430107O13Rik	-1.08384	0.00762252
Tceal3	-1.55301	0.0175986			Gucy1a2	-2.16389	0.0076174
1810019D21Rik	-1.39486	0.0175452			Sphkap	-1.57376	0.0076088
Lnpep	1.2067	0.0175198			Fcer2a	-1.67261	0.00759158
Gm11992	-1.20558	0.0174929			Ppp2r2b	-2.34015	0.00758854
Mtrr	1.08652	0.0174442			Shh	-1.9561	0.00758432
Lcp2	1.07832	0.0174256			Cdc14a	-1.51822	0.00758432
Ryr2	-2.10889	0.0174256			Tmem132d	-1.48855	0.00757824
Blk	-1.72695	0.0174206			2310015B20Rik	-1.86373	0.00757824
Bcl2a1c	1.24951	0.01742			Myh13	-2.32921	0.00753876
Thap2	-1.49983	0.0174165			Abca17	-2.60444	0.00751537
Ttc39d	-1.07673	0.0173822			Efcab4b	-1.70313	0.00749965
Ercc6l	1.02543	0.0172693			Suv420h2	-1.07004	0.00746904
Frem1	-1.08343	0.0172276			Slc4a8	-1.01408	0.00739347
Samsn1	1.12476	0.01722			9830001H06Rik	-1.2905	0.00734663
Ces1h	-1.26369	0.01722			Rnf208	-1.12758	0.00729539
Kiss1	-1.64568	0.0171887			Kcna1	-2.02119	0.00728108
Fxyd4	2.55481	0.0171605			Slc7a10	-2.98865	0.00725005
Rasl10a	-1.81143	0.0171365			Dmd	-1.0797	0.00724207
Cntnap2	-1.13138	0.0171322			Rgnef	-1.2131	0.00723827
Olfr470	1.6169	0.0171295			Pgm2l1	-1.3451	0.00718422
Cyp2s1	-1.33307	0.0171219			Ets1	-1.00837	0.00718195
Pde10a	2.43339	0.017103			A930023M06Rik	-2.10606	0.00717315
1500026H17Rik	-1.35183	0.0170999			Bcl7a	-1.80793	0.00715857
Cx3cr1	-1.17679	0.0170137			Bfar	-1.02544	0.0070533
Clmn	-1.79434	0.0169919			Tmtc2	-1.43327	0.00704935
Ppp2r2b	-1.9641	0.0169848			Exoc8	-1.0035	0.00704935
Apon	1.97073	0.0169617			4931429I11Rik	-1.85552	0.00698646
Slc11a1	1.8686	0.0169547			Prom2	-2.91699	0.00697491
Fam19a1	-1.01699	0.0169258			Spice1	-1.3792	0.00697491
Ubxn10	-1.06197	0.0169098			Lrrc17	-1.54998	0.00697491
A330093E20Rik	1.72967	0.0168237			Itga8	-2.37049	0.00696812
Pmaip1	1.17211	0.0168019			Dnahc8	-1.044	0.00696626
S100b	-2.09852	0.0167898			Npw	-1.68577	0.00695521
Krt80	1.01829	0.0167833			Tcfcp2l1	-1.25643	0.00695096
Tlr6	1.37821	0.0167118			Itih5	-1.22563	0.00690276
Hdac11	-1.40224	0.0167118			Rasl10a	-1.95919	0.00688526
Tubb3	1.75681	0.0166809			Emid2	-2.41773	0.00686836
Mcf2l	-1.22125	0.016669			1190007I07Rik	-1.21603	0.00686554
Tnfsf15	1.17201	0.0165763			Pik3c2g	-1.87734	0.00684075
F630043A04Rik	1.17281	0.0165387			Usp26	-1.31954	0.00683198
Csf2rb	1.0724	0.0165228			ND3	-1.13395	0.00681598
Arl15	-1.12019	0.0165202			Cdnf	-1.16773	0.00681406
Gvin1	1.38788	0.0165036			Sptlc3	-1.70369	0.00680741
Trpm2	1.25417	0.0164781			Aard	-2.25703	0.00680708
Gm7467	-1.35147	0.0164324			Fgfr2	-1.09389	0.00680641
Faim2	-3.00125	0.0163576			Gstk1	-1.03902	0.00676556
Ccdc65	-1.0361	0.0163063			Kank3	-1.26185	0.00675959
Spg20	1.06087	0.0163017			1810009N02Rik	-1.06957	0.00675959
Tmem132c	-2.37994	0.0162833			Cox8b	-2.48564	0.00672771
Casc5	1.1186	0.0162742			4933406B17Rik	-2.55418	0.00671631
5830428M24Rik	-1.87868	0.0162598			Adamts10	-1.10506	0.00671631
Ptpn22	1.71579	0.0162552			Klk1b21	-1.01568	0.00671631
Mat1a	1.47739	0.0162552			Etv5	-1.86872	0.00671108
Cd300lb	1.31995	0.0162171			Sh3bgr	-1.11972	0.00666981
Nme3	-1.21614	0.0161721			Rxfp4	-3.15336	0.0066276
Rarb	-1.02411	0.016156			Kit	-1.56755	0.00662644
Gm221	-1.02638	0.0161433			Chia	-1.38121	0.00661799
Plch2	-2.09384	0.0161131			Edn3	-1.51521	0.00661519
Myl4	-3.42834	0.0160538			Adra2c	-1.90465	0.00660643
Cpe	-1.59911	0.0160503			Slc6a9	-1.11507	0.00660215
Krt6a	2.25972	0.0160244			Mid2	-1.01746	0.00660215
Rgs11	-2.09205	0.0160045			Slc38a11	-1.65071	0.00659985
Ttn	-3.34537	0.0159866			Tspan1	-1.40959	0.0065912
Olfr267	1.4879	0.0159847			2010300C02Rik	-1.16022	0.00657784
1700040L02Rik	-2.08235	0.0159776			Arsk	-1.22856	0.00656915
Olfr780	1.62469	0.0159708			Spna1	-2.97668	0.00650271
Sh3bp2	1.14123	0.0159632			Ttc30a2	-1.5861	0.00649653
Noc4l	1.0273	0.0158965			1700034E13Rik	-2.01813	0.00649433
Lrg1	1.16415	0.0158867			Olfr532	-2.25327	0.00647104
Vwa3a	-1.0356	0.0158867			Slc1a3	-1.18339	0.00647104
Cd84	1.13703	0.0158187			Ecm2	-3.51038	0.00647104
Gm14207	-1.16641	0.0157895			Pinx1	-1.47862	0.00647104
Bmp3	-1.66332	0.0157422			Cd79a	-1.76866	0.0064694
Cxcl12	-1.0019	0.0157335			Pura	-1.2669	0.00646043
F630110N24Rik	1.44125	0.0157115			B9d1	-1.04394	0.00645493
Eid3	1.38272	0.0157115			Angpt2	-1.07194	0.0064424
Six1	-1.28707	0.0156818			Ntrk3	-1.36594	0.00644222
Gucy1a2	-1.32751	0.0156818			Atf7	-1.45494	0.00644123
Adra2c	-1.58713	0.0156818			Extl1	-1.40973	0.00641745
Cnksr2	-1.82885	0.0156818			5430405G05Rik	-1.05751	0.0063918
Kbtbd13	-2.32465	0.0156802			Klhl8	-1.07556	0.0063918
Mb	-4.28121	0.0156802			Map2k6	-1.54029	0.0063889
Sp140	1.60162	0.0156769			Npr1	-1.71435	0.00638455
Hspb7	1.16591	0.0156512			Hoxa1	-1.69204	0.00637539
Golt1a	1.17945	0.0156426			Tnfrsf17	-1.7509	0.00637077
Tmem191c	-1.13718	0.0156131			Spns2	-1.00497	0.00637077
Cdk1	1.64849	0.0156076			Bola1	-1.92589	0.00633725
Ampd1	1.13175	0.0155779			Chst1	-1.00068	0.00632051
4930452B06Rik	-1.29114	0.0155762			Zfp882	-1.67838	0.00631716
Plekho2	1.18542	0.0155724			Mapre2	-1.10473	0.00631716
Blcap	1.1023	0.0154747			Bach2	-1.25317	0.00628032
Ptpn20	-1.2154	0.0154334			Cttnbp2	-2.47193	0.00627828
Gpha2	1.01015	0.0154181			Zfp385b	-1.68291	0.00626463
S100z	-2.0082	0.0153451			Gm15628	-1.62842	0.00622208
LOC435333	-1.64804	0.0153291			Arl15	-1.25222	0.00618786
Casp4	1.54096	0.0153233			Ccdc162	-2.81191	0.00618786
Patz1	-1.20229	0.0152798			Sspn	-1.17276	0.00618503
1700061J05Rik	1.21864	0.0152789			Vezf1	-1.28925	0.00618503
Dok1	1.21482	0.0152787			Smurf2	-1.00893	0.00618215
Snx22	-1.68625	0.0152569			Ptgds	-1.25519	0.00617761
Gimap1	-1.01851	0.01525			Rassf3	-1.15218	0.00617761
Hs3st3b1	-1.22477	0.01525			Slc22a14	-1.6102	0.00615879
Tcfec	1.07525	0.0152051			Adrb3	-3.59374	0.00615785
Dpep2	1.48195	0.0151954			Hs3st3b1	-1.05462	0.0061536
Smpdl3b	1.20942	0.0151826			Zmat4	-3.83886	0.00614419
Mxd1	1.62657	0.015181			Elf5	-1.60065	0.00613531
Pdzd2	-1.93412	0.0151296			Adra1a	-1.84516	0.00613464
Spp1	1.81227	0.0151268			Plin5	-1.48558	0.00613464
2310002J15Rik	1.1115	0.0150967			Fam19a5	-1.72843	0.00613257
Rtkn2	-1.47728	0.015082			Tmco6	-1.1161	0.00607576
Kcnt1	2.18614	0.0150715			Mib2	-1.35084	0.00606658
Cpm	-2.21417	0.0150702			Gm12695	-3.53459	0.00605667
LOC100046275	-1.1164	0.0150561			Sult6b1	-1.30896	0.00605222
Fanci	1.03098	0.0150132			Sp5	-1.80424	0.00601423
4930555I21Rik	-2.29311	0.0149703			Txnip	-1.10514	0.00599912
Gm14166	-2.78857	0.0149458			Ypel2	-1.47831	0.00598789
Sema7a	2.32039	0.0149054			Kbtbd13	-1.79496	0.00594418
Gm4632	-1.62151	0.0149002			Syt3	-1.46176	0.0059127
Olfr1417	1.29721	0.0148881			Bpgm	-1.13421	0.00589356
Lpxn	1.85959	0.0148349			Scgb3a1	-5.46955	0.00589155
Osbpl6	-1.02192	0.0148349			Hadh	-1.12889	0.00588022
Scn7a	-1.97263	0.0148349			1110020G09Rik	-1.34389	0.00587798
BC013712	1.87524	0.014797			Tmprss13	-3.12671	0.00587156
Alox5ap	1.22491	0.014797			Adrbk2	-1.47349	0.00586406
Kcnh8	1.57457	0.0147927			Olfr1043	-1.04331	0.00585858
Zfp697	1.03126	0.0147897			Ly6g6e	-1.17518	0.0058238
Colec10	-2.06584	0.0147842			Ropn1l	-1.34512	0.00582077
Pon1	-3.79988	0.01478			Jun	-1.11971	0.00577253
5330417C22Rik	-2.67785	0.0147767			Got1l1	-1.2239	0.00574954
Ifna13	1.69432	0.0147662			Ift80	-1.20113	0.00573551
LOC100046496	-1.18661	0.0147662			Amigo1	-1.74376	0.00572077
Gstz1	-1.37765	0.0147662			Cyp2j9	-1.51544	0.00571855
Cry1	1.04016	0.0147364			Ccdc103	-1.34761	0.00571274
Nox4	-1.07182	0.0147295			Kctd12b	-1.24787	0.00570689
Ccdc81	-1.27804	0.0147279			Pdk2	-1.52047	0.00570689
Dtl	1.90529	0.0146773			Tyro3	-1.2765	0.00569032
Cyp26a1	1.4654	0.0146773			Cd97	-1.35854	0.00568969
Gprin3	-2.45007	0.0146773			P2rx6	-2.79509	0.00568067
Lyve1	1.47921	0.0146733			Bmp4	-1.52084	0.00568067
Pla2g10	1.10619	0.0146705			Gm3853	-1.82249	0.00567819
Olfr920	1.45419	0.0146416			Ahcyl2	-1.08142	0.00567262
Cpne9	1.94023	0.0146394			1700012B09Rik	-2.79175	0.00567001
0610011F06Rik	-1.02401	0.0146195			Akr1b7	-2.33909	0.00567001
Gm6958	1.11049	0.0145911			Mesp2	-1.61664	0.00567001
Nxph3	-1.45473	0.0145625			Dalrd3	-1.10936	0.00564554
Krt10	-1.0659	0.0145489			Grik4	-1.18833	0.00564201
Grb7	-1.50325	0.0145296			Krtap17-1	-2.40021	0.00563857
Syne2	-1.38878	0.0144782			Ccnjl	-1.02569	0.0056303
Il12rb1	1.8391	0.0144259			Dgkb	-2.78787	0.00561117
Gstm7	-1.17465	0.0144259			Fam159a	-3.16105	0.00560304
Vnn1	1.48337	0.0143847			Oprm1	-1.57049	0.00560079
Gm6846	1.07998	0.0143704			Gm12942	-1.6469	0.00560079
Marcksl1	1.76065	0.0143652			Tril	-3.61705	0.00560079
Tnfrsf1b	1.32462	0.0143652			Vamp1	-1.07087	0.00560079
Rcan1	1.02869	0.0143628			1110012J17Rik	-1.59838	0.00560079
Enpp1	-1.39752	0.0143453			Afap1l1	-1.21148	0.00558025
Ctsh	1.42698	0.0142875			Notch3	-1.24979	0.00557853
Nek11	-1.6052	0.0142875			Il12a	-2.26761	0.00557853
Spag16	-1.84779	0.0142658			Fam120b	-1.23102	0.00556806
1300014I06Rik	1.29054	0.0142371			1810062O18Rik	-1.20095	0.00556422
Rnd1	1.85748	0.0142124			Ces2e	-3.25236	0.0055543
Spata17	-1.14579	0.0141562			Tmem149	-1.15512	0.00554252
4930543N07Rik	1.00657	0.014134			Nat1	-1.33945	0.0055397
Fbn2	-1.05742	0.0140767			Slc5a12	-3.08621	0.00552914
Ddb2	-1.14799	0.0140767			Crym	-1.01895	0.00551367
A230107N01Rik	-1.49615	0.0140658			Apol11b	-1.35986	0.00549596
Gulp1	-1.19456	0.0140568			Ptpn20	-1.85574	0.00549583
Crybb1	1.94423	0.0140513			Ripply3	-1.20843	0.00549118
Kcnc2	-1.22019	0.0140472			Etl4	-1.06939	0.00548427
Sele	2.55393	0.0140027			Prdm6	-1.41542	0.00546254
Slc6a13	1.4459	0.0139682			Tspyl4	-1.65186	0.00546177
Adamts17	-3.69087	0.013967			Acsm1	-2.42885	0.00545581
Ctrl	1.08343	0.0139508			Wnt2	-1.22588	0.0054417
Itgbl1	-1.22316	0.0139292			Gm4588	-2.10068	0.00544144
Paqr9	-2.32891	0.0139216			Fam181b	-1.71834	0.0053843
Ceacam16	1.10518	0.013897			Pltp	-2.40133	0.00538206
Sspn	-1.82179	0.013897			Grb14	-1.71192	0.0053534
Emr1	1.29943	0.0138916			Tek	-1.11515	0.00534938
Brip1	1.57388	0.0138469			Fam178b	-1.1793	0.00533859
1810041L15Rik	-1.53701	0.0138443			Scn7a	-2.15818	0.00532088
Map3k8	1.2455	0.0138371			6820408C15Rik	-1.65961	0.00531991
Tbc1d30	-1.97672	0.0137892			Abca3	-1.42852	0.00531884
BC060267	-1.1178	0.0137544			Olfr331	-1.30488	0.00531884
Fer1l4	-1.00744	0.0137404			Lrriq1	-2.20268	0.00531809
Ybx2	-1.2928	0.0136956			1700088E04Rik	-1.21951	0.00530673
Slit2	-1.09135	0.0136729			Cacnb1	-1.29108	0.00528529
Cdadc1	-1.00414	0.0136685			Foxj1	-1.2615	0.00528326
Ptgs2	1.11388	0.0136609			4930473A06Rik	-2.12986	0.00528326
Gab2	1.02695	0.0136375			Cadm2	-1.72996	0.0052747
Sla	1.35139	0.013614			Krtap16-7	-1.78431	0.00526209
Rnf207	-2.17076	0.0136129			Arap2	-1.10574	0.00526138
Ogn	-2.85331	0.0135863			Zfp831	-1.7644	0.00526138
Fhdc1	-2.09494	0.013585			Myh14	-1.00932	0.00525087
Grem2	-1.40094	0.013537			Cdhr4	-1.51618	0.00522943
Pira2	1.87323	0.0135337			Bend5	-1.16529	0.00522943
Cd5l	2.61244	0.013503			Ddah2	-1.21211	0.00522943
C85492	-1.09219	0.013503			Csad	-1.60642	0.00522241
Slc22a17	-1.67401	0.013503			Clstn2	-1.54374	0.00522165
Kif26a	-1.69998	0.0134723			ND4L	-1.14578	0.0052106
Cat	-1.55178	0.0134597			AA414992	-1.4154	0.00520903
Slc35d3	-2.51301	0.0134597			Cntn1	-1.33064	0.00520172
D630004K10Rik	-1.65579	0.0134434			Gm5590	-1.4797	0.00519582
Dio2	2.3158	0.0134272			2410125D13Rik	-1.55004	0.00518638
Ephb6	-1.37774	0.0134208			Siglecg	-1.58625	0.00518638
Ntf3	-1.7483	0.0133903			Adra2a	-1.37454	0.00515413
Inhbb	1.7607	0.0133902			Rgs2	-1.08317	0.00515295
Tyro3	-1.05065	0.0133769			Aldh4a1	-1.11269	0.00515208
LOC639930	-1.00205	0.0133459			Gm4368	-1.09377	0.00514763
Cntn5	-1.87011	0.0132709			Tnfrsf19	-1.81768	0.00514523
9430008C03Rik	1.08573	0.0132512			Ctxn1	-1.31659	0.00514019
Zmynd12	-1.38843	0.0132444			Pcmtd2	-1.65349	0.0051036
Dmrt2	-1.47205	0.0132315			Ushbp1	-1.85022	0.00510185
Calcr	2.1225	0.0132277			Syne2	-1.62152	0.00507163
F2rl1	1.47129	0.0132149			Tceal1	-1.69214	0.00505947
Gstm2	-1.07452	0.0132018			Gjb6	-2.05829	0.00503743
Ces2e	-4.73547	0.0131996			Mid1ip1	-1.45003	0.00503743
5330437I02Rik	-1.20289	0.0131963			Akd1	-3.24554	0.00501391
Olfr97	1.81328	0.0131949			Mapk15	-1.53845	0.00500614
Tigit	2.81809	0.0131945			Serf1	-1.26332	0.00498663
Col4a1	1.07551	0.0131945			Nos1ap	-1.25896	0.00497405
1190002N15Rik	-1.53377	0.0131918			Sh3d19	-1.08064	0.00496165
Tmem50b	-1.31631	0.0131711			Naaladl2	-1.2774	0.00496165
Il23a	1.94685	0.01316			Gpr82	-1.81006	0.00496165
Dync2li1	-1.22816	0.01316			Antxr2	-1.10553	0.00496165
Ptger4	1.14983	0.0131391			Pnmal2	-1.13775	0.00493682
Acp2	1.13037	0.0131391			Dusp18	-1.18583	0.00493682
Sntn	-2.39795	0.0131241			Gsg1l	-2.31079	0.00493638
Ccdc80	1.1804	0.0130318			Klhl24	-1.84273	0.00491069
Litaf	1.11379	0.0130258			6720401G13Rik	-3.39664	0.00490716
Gm1966	1.65855	0.01299			Ing4	-1.20904	0.00490652
Niacr1	1.20839	0.01299			Stab2	-3.06702	0.00489283
Ccdc129	-4.77808	0.01299			Neurl4	-1.01905	0.00489009
Tarm1	3.14687	0.0129684			2022-09-04	-1.27057	0.00489009
Agpat9	1.21924	0.0129481			Dync2h1	-1.08764	0.00488999
Foxn4	-2.27178	0.0129481			Hbq1a	-1.83994	0.00487786
Slc27a2	-2.02332	0.0129446			Dock9	-1.3894	0.00487238
Igsf6	1.89597	0.0129115			6430550D23Rik	-2.28124	0.0048555
LOC100045791	-1.63225	0.012893			Fuz	-2.0175	0.0048555
Map3k6	1.63347	0.0128902			Iqck	-1.22514	0.00483807
Zan	-1.44428	0.0128697			Cidec	-1.06854	0.00480772
Nfe2	1.1428	0.0128539			Cst8	-2.90431	0.00480159
Oas1d	1.02139	0.0128393			Mpped2	-1.51727	0.00478981
Fam38b	-1.60704	0.012817			Fam120c	-1.17805	0.00478797
Xcr1	-1.31735	0.0127947			Gstt1	-1.93824	0.0047848
Pdzd3	2.09263	0.0127726			4931403G20Rik	-1.50083	0.0047798
Rnf149	1.06923	0.0127036			Syne1	-1.28816	0.00477777
Fam19a5	-1.30168	0.0126965			Reps2	-1.84343	0.00476607
Lrrc32	1.01042	0.0126728			Rnf32	-1.50327	0.00475045
Evi2a	1.63187	0.0126523			Ddx17	-1.13241	0.00474516
1110032F04Rik	-1.26941	0.0126183			Fgfr4	-1.6931	0.00467959
Pdk4	1.62254	0.0125952			Smad6	-1.44113	0.00467959
Ddo	-1.18661	0.0125933			Pacrg	-1.2375	0.00466445
Cd14	1.24605	0.0125787			Ptch1	-1.21541	0.0046636
Mastl	1.09603	0.0125705			Gm7265	-1.15655	0.0046635
Pdk2	-1.68466	0.0125705			Gpc3	-1.30971	0.00464497
Iqgap2	1.3277	0.0125549			Ppil6	-3.072	0.00464481
Nr3c2	-1.09297	0.0124968			Adam33	-1.07792	0.00463454
Ces1g	-3.80087	0.0124548			Lrrn3	-1.99506	0.00457446
Cyhr1	-1.38598	0.0124234			BC051628	-1.26739	0.00456075
5430405G05Rik	-2.23484	0.0124073			Nek11	-3.84051	0.00456075
Fsd2	-2.03437	0.0123795			Nrarp	-1.1959	0.00456075
Rap2b	1.12644	0.0123413			Plxnd1	-1.21179	0.0045572
Spag8	-1.81855	0.0123342			Ccdc24	-1.08376	0.00454628
Tln2	-1.54321	0.0123311			Rragb	-1.19102	0.00453272
4930546O09Rik	-1.01044	0.0122357			Olfr550	-2.07653	0.00450914
Hist1h3a	1.3282	0.0122275			Cbfa2t3	-1.67516	0.00450537
Gen1	1.27736	0.0122029			Epor	-1.6815	0.00450313
Ppp3r2	-1.31028	0.0121889			Numa1	-1.27033	0.00449021
St8sia2	-1.71266	0.0121778			Bbs2	-1.62877	0.00449021
Rcan2	-1.37058	0.0121531			Shisa9	-1.87997	0.0044888
Dmrtc1c2	1.17615	0.0121388			1700013N18Rik	-1.14806	0.00448281
Rab36	-1.09625	0.0121192			LOC100505237	-1.20433	0.00447775
Olfr576	2.19481	0.0121018			St8sia4	-1.40964	0.00447487
Spib	-1.15099	0.0121018			Gp2	-3.29612	0.00447487
Cyp2a4	-2.30464	0.0121018			Tex11	-3.21813	0.00447487
Ccna1	-3.25969	0.0121018			1700016J18Rik	-2.49328	0.00447456
Bmp4	-1.12563	0.0120565			Olig3	-2.47033	0.00443802
Clec3b	-2.19597	0.0120453			Thbd	-1.35473	0.00443089
Nov	-1.05821	0.0120448			Enpep	-1.82846	0.00443089
Hes5	-1.03642	0.0120399			Gm3716	-1.64085	0.00443023
Vmn2r35	-1.46885	0.0120195			Lsamp	-1.52307	0.00443023
Hmgcs2	-3.72368	0.0120109			Arntl	-1.37617	0.00442089
Golga7b	1.06657	0.0119761			Pm20d1	-2.09572	0.00441405
Zfp385c	-1.17261	0.0119761			Fxyd1	-1.11035	0.00441405
Mgat4a	1.61175	0.0119576			Brwd1	-1.11929	0.00441041
Nsun7	-1.64629	0.0119443			Gm2461	-2.07701	0.00441001
Mrgprx2	1.80612	0.0118507			Gtf2i	-1.16258	0.00440138
Retnla	2.39561	0.0118148			5430414B12Rik	-2.25718	0.00440138
B4galnt2	1.40377	0.0118148			1810049H13Rik	-1.02775	0.00439961
Mmp27	1.97185	0.0118119			Tmcc3	-1.41279	0.00439779
Entpd5	-1.26658	0.0117883			Tpcn1	-1.10335	0.00437683
Tifa	1.49849	0.0117808			Foxa1	-1.26122	0.00436808
Lilrb3	1.47697	0.0117763			Bex4	-1.51535	0.00436361
Tprg	2.73908	0.0117683			Gm9558	-2.53853	0.00436237
9030625A04Rik	1.29617	0.0117603			9530004P13Rik	-1.51113	0.00435458
Abca8a	-1.51361	0.0117499			Hacl1	-1.1075	0.00435458
Mospd4	1.31661	0.0117456			Cecr6	-1.56485	0.00434529
1700007E05Rik	1.29898	0.0117252			Ccdc39	-1.90898	0.00434002
Tmprss13	-3.02715	0.011698			Gja3	-1.17878	0.00434002
Ysk4	-1.57306	0.0116788			4930480K23Rik	-1.33848	0.00433899
Cldn22	-4.05411	0.0116788			Wdr38	-1.26814	0.00432007
B3gnt4	-2.57442	0.0116788			Kcna2	-2.09	0.00431901
Ccdc154	-1.58535	0.0116676			Dyrk2	-1.10149	0.00430958
Rasd1	1.46984	0.0116302			Cd19	-2.09951	0.00430958
Agr3	-1.5352	0.011614			Gm4787	-1.89384	0.00430768
Ltbp2	-1.46051	0.0115477			Acoxl	-2.90885	0.00430768
Thnsl2	-1.05406	0.0115406			Sntb1	-1.15143	0.00430658
Fam83e	-1.04292	0.0115042			Upk3a	-3.94183	0.00430332
Sgca	-1.91292	0.0115042			Hsf4	-1.05349	0.00430199
Serpina3b	2.07667	0.0114386			Ptprb	-1.71596	0.00427318
LOC100502627	-1.42073	0.0113806			2010001M09Rik	-1.53592	0.00425429
Has2	2.57872	0.0113099			Tnrc6c	-1.10594	0.00423944
Lhfpl5	-1.18224	0.0113033			Slc4a1	-2.80423	0.00423613
Snn	-1.09418	0.0112989			Ankrd33b	-1.08553	0.00423613
4932425I24Rik	-1.01719	0.0112441			C2cd4a	-2.17911	0.00423502
Pappa	1.26155	0.0112421			E030044B06Rik	-2.2758	0.00422544
P2ry14	1.23452	0.011204			Lgsn	-1.79506	0.0042003
Gm10896	-1.89585	0.0111745			Sco2	-1.3842	0.00419158
Nmur2	1.48455	0.0111422			LOC100505009	-1.75589	0.00417062
Oaz2-ps	-1.24244	0.0110974			Ttc36	-1.26111	0.00417062
Tmeff2	-2.29619	0.0110933			Dlec1	-3.30677	0.00416292
Tbc1d10c	-1.17375	0.0110805			Fam53b	-1.24711	0.00415074
Dact3	-1.05975	0.0110604			Tceal6	-1.16845	0.00414906
Dhrs7c	-4.55754	0.0110581			Tbc1d4	-1.34508	0.00414492
Tie1	-1.45676	0.0110452			4930529M08Rik	-1.21101	0.00413467
Rasgef1a	-1.42524	0.0110419			Fam164a	-1.26504	0.00412072
Gnat1	3.01354	0.0110158			Prdm16	-1.02119	0.00412072
Igk-C	-1.57651	0.0110158			BC057022	-2.31274	0.00409411
Crabp1	-1.91996	0.0109993			Nfia	-1.06419	0.00409239
Zmat4	-3.99666	0.0109943			Lrrc26	-2.96747	0.00408549
Gstm6	-1.63046	0.0109937			Iqsec2	-1.02436	0.00408504
Tpx2	1.52165	0.0109519			Rarb	-1.3717	0.00405943
Melk	1.57144	0.0109117			Tymp	-1.41548	0.00405452
Gm889	3.78052	0.0108877			6030429G01Rik	-1.40309	0.00405272
Stx11	1.59519	0.0108877			Sfrp2	-2.82007	0.00405272
Atp2a3	-1.33428	0.0108848			P2rx5	-1.75528	0.00404535
Ctsf	-1.85394	0.0108714			Lrrc34	-2.2945	0.0040233
Ly96	1.17758	0.0108645			Cldn10	-2.33743	0.00401954
Rnf186	-1.84678	0.0108645			Pcbd1	-1.00876	0.00401954
Gpr31c	2.90956	0.0108592			Cst3	-1.06636	0.00401462
Epm2a	-1.72936	0.0108592			Ngb	-2.14355	0.00400604
Meg3	-1.39988	0.0107876			Akap7	-1.69548	0.00400445
Mvp	1.20646	0.0107847			Tsc22d1	-1.2148	0.00398909
Zfand1	-1.08565	0.0107777			Pabpn1l	-3.52186	0.0039817
Ces2c	-2.6768	0.0107115			Aass	-3.50641	0.00397894
Adra1a	-1.35674	0.0107072			Raver2	-1.431	0.00397821
Dusp8	1.49852	0.0106847			Zfand1	-1.08094	0.00396896
9530003J23Rik	-3.11141	0.010677			Letm2	-1.45412	0.00396896
Insrr	1.92538	0.0106557			1700007K13Rik	-2.36626	0.00395746
Rbp4	-1.76335	0.0106557			Rasgrp3	-1.81434	0.00394532
Aldh1b1	2.66976	0.0106461			Ociad2	-1.67851	0.00392488
Tcf15	-1.40648	0.0106447			Idh2	-1.135	0.00392488
Il13ra2	1.42685	0.0106392			Acss2	-1.44859	0.00391699
Gm7644	1.60031	0.0105828			Tcerg1l	-1.19285	0.00391524
Tmem44	-1.13105	0.010521			Vegfa	-1.02985	0.00391303
Cd68	2.0633	0.0104844			Chrm2	-1.35801	0.00391303
Stox1	-1.44739	0.0104844			B930095G15Rik	-1.07085	0.00390943
Fam81a	-1.6502	0.0104669			Notch1	-1.49765	0.00387792
Nt5e	1.12023	0.0104667			1190002N15Rik	-1.80815	0.00387412
9530026P05Rik	-2.77934	0.0104667			AU023871	-2.03787	0.00385873
Ulbp1	1.02273	0.0104664			Foxa2	-1.08703	0.00383789
Aldh6a1	-1.68178	0.0104386			Gdf1	-1.21449	0.00383155
Nos1ap	-1.2175	0.0104373			Tbxa2r	-1.23404	0.00382233
Sox18	-1.64845	0.0104245			Lpar3	-2.10415	0.00381251
A530023O14Rik	2.46202	0.0104141			Exosc7	-1.52264	0.00380163
Mef2a	1.42706	0.0104048			Zfp187	-1.20922	0.00380163
Rgs9	-1.64833	0.010378			Morn3	-1.90004	0.00379906
Gm15628	-2.08122	0.0103775			Sms	-1.01902	0.00379079
Olfr401	-2.49849	0.0103775			Efhb	-1.52071	0.00378266
4921517D21Rik	-1.18648	0.0103735			2310057B04Rik	-2.35047	0.00377666
Spag17	-1.27413	0.0103646			Ptplad1	-1.27387	0.00377126
Gbp8	1.91154	0.0103137			Cd79b	-1.87722	0.00377124
Ldb2	-1.09527	0.0103109			Fam84b	-1.46837	0.00376808
Prom1	-1.26195	0.0103051			Gnao1	-1.07964	0.00376008
8430426J06Rik	-1.44208	0.0103051			Tjp3	-1.3744	0.00375108
D930001M23Rik	-2.03602	0.0102846			Rab3a	-1.52627	0.00374546
Emb	-1.31053	0.0102806			Cd209c	-3.05277	0.00369328
Cdc14a	-1.03274	0.0102717			Slc19a3	-1.81408	0.00369042
Klf12	-1.03347	0.0102649			Dpysl2	-1.28574	0.00369042
Arrb1	-1.05412	0.0102649			Gata3	-1.93471	0.00368978
Gm3367	2.42953	0.0102384			Fmo3	-4.65171	0.00367876
Prkag2	-1.05063	0.0102384			Bbs9	-1.1154	0.00367315
Nek5	-1.09157	0.010203			Il17rd	-1.49059	0.00366813
Gm5595	1.02126	0.0102009			Tmem25	-1.53357	0.00366546
Pik3r3	-1.01293	0.0101981			Pih1d2	-1.45815	0.00366442
Mrgpra5	2.79945	0.0101926			Wbp1	-1.24391	0.0036633
Klhl13	-1.91307	0.0101916			Ephx4	-2.10609	0.00365562
Gap43	-1.93246	0.0101916			Clec9a	-2.40519	0.00364887
Sspo	-2.33653	0.0101916			Cnfn	-1.90108	0.00364413
Pnliprp1	-3.11483	0.0101916			Tcp11	-1.59311	0.00363174
Myl3	-3.41509	0.0101916			Otop1	-2.62733	0.00362823
Myh6	-4.20551	0.0101916			Gap43	-1.80495	0.00361847
Bpil1	-1.38061	0.0101882			Cldn8	-3.1339	0.00361827
Nrcam	-1.19746	0.0101862			Fam13a	-2.39759	0.00361827
Fcgr3	1.81825	0.010148			Zfp474	-1.43136	0.00361673
4930557A04Rik	1.01961	0.010148			Aqp1	-1.06397	0.00357534
Grn	1.19856	0.0101398			Tmem204	-1.36402	0.00357353
Fgd4	1.22188	0.0100969			Rftn2	-2.09904	0.00356793
Ripk2	1.47232	0.0100957			Anapc13	-1.20303	0.00354091
ND3	-1.18131	0.0100957			Tspan13	-2.27272	0.00353822
LOC641221	-1.41305	0.0100957			Lgals2	-2.00444	0.00353407
Gsdmd	1.00578	0.01009			5430425K12Rik	-1.96598	0.00353153
Mfap5	-1.01	0.0100533			Ntn5	-1.85883	0.00353153
Ctss	1.34667	0.0100441			Chst7	-1.5091	0.00352847
Olfr1380	1.14045	0.0100441			Stox1	-1.80615	0.00352847
Zrsr1	-1.10284	0.0100441			Lrrc56	-1.68344	0.00352722
Tmem204	-1.15384	0.0100441			Ifi27l1	-1.46422	0.00352108
Gja4	-1.28392	0.0100441			Col4a5	-1.03982	0.00351572
Casq1	-1.88647	0.00999856			Snx22	-1.59658	0.00351247
Gm1661	-1.22514	0.00998894			Ephb6	-1.50324	0.00351247
Defa-rs4	1.20202	0.00998737			She	-1.28389	0.00349935
Gm13138	-1.35401	0.0099721			Cited2	-1.13946	0.0034853
Icam5	2.31671	0.00996792			Meis1	-1.32529	0.0034853
Fam18a	1.76432	0.00989544			Ccdc60	-1.67518	0.00347092
Rgmb	1.31041	0.00988853			Myl12b	-1.13727	0.00346322
Bfsp2	-1.19382	0.00986586			Fmo5	-2.13365	0.00346264
Ctrc	2.6419	0.00986573			Cd209f	-3.05309	0.00346195
Syt5	-1.23261	0.00985388			Btnl2	-1.65405	0.00345731
Xlr4d-ps	-1.53245	0.00983774			Ccdc154	-3.06713	0.00344797
Slc45a1	1.77383	0.00983348			Luc7l3	-1.08391	0.00344178
LOC100505009	-1.68023	0.00983348			Ccdc96	-1.78595	0.00344178
Ddc	-2.0915	0.00981709			6330407J23Rik	-1.44997	0.00343515
Dydc2	-1.2192	0.00981489			Abcg5	-1.97146	0.00343273
Npy1r	-1.81778	0.0097898			Mapk1ip1	-1.3815	0.00342676
A730056A06Rik	-1.92031	0.00978464			Tmem35	-2.60494	0.00339829
Ptprcap	-1.20201	0.00974968			Hs6st3	-1.02964	0.00339214
Ppp1r15a	1.41836	0.00974444			Bbox1	-2.04845	0.00338714
Tectb	2.02549	0.00974439			Ogn	-2.15758	0.00338714
AY761185	2.64265	0.00973751			Wdyhv1	-1.07243	0.00338214
AW112010	1.4093	0.00973751			Asb14	-2.74964	0.00336042
2700078E11Rik	1.13033	0.00973751			Ccdc48	-2.47085	0.00336042
Clec4a3	2.18149	0.00973545			Alas2	-5.33231	0.00335951
Spc24	1.56816	0.00973545			Gfra1	-1.4562	0.0033564
Tcp10b	1.60324	0.00973426			Mmp11	-1.39854	0.00335089
BC035044	-1.20239	0.00973426			Tbx3	-1.47999	0.00334195
Slc25a27	-1.44725	0.00973426			Sfxn2	-1.14726	0.00333778
Gbp9	1.74009	0.00971857			9030224M15Rik	-1.8451	0.00333623
Per1	1.57475	0.00971223			Gm7689	-2.37904	0.0033361
3021401N23Rik	-1.69368	0.00969398			E230019M04Rik	-1.9853	0.00333394
Gabrp	-2.14358	0.00969227			D3Ertd751e	-1.63656	0.00332292
Ces1e	-3.54958	0.00969227			Rtn1	-1.54449	0.00332292
Trim2	-1.1169	0.00968465			Grcc10	-1.21358	0.00330049
Pate2	1.51396	0.00968145			Ccdc28a	-1.20209	0.00330049
Ptprb	-1.53417	0.00963951			Gpd1	-1.13565	0.00329905
Cdh13	-1.26451	0.00963931			Epas1	-1.21052	0.00329905
Lhx9	2.25131	0.0096358			Nudt10	-1.0915	0.00328205
Peg3	-1.08822	0.00961489			Abcc9	-1.3174	0.00328205
Gm949	1.31002	0.00960607			Nthl1	-1.08306	0.003278
Akr1c18	2.19567	0.00959123			Cd207	-4.91086	0.00326614
Kcne4	1.61806	0.00958092			Cnksr2	-2.1941	0.003257
Tmem35	-2.97306	0.00957981			Rnpc3	-1.07439	0.00325012
Slc5a12	-2.53409	0.00957589			Arhgef19	-1.19212	0.00324564
Tbc1d16	-1.23494	0.00957456			Sytl2	-2.29444	0.00323783
B3gnt3	1.47252	0.00957256			Myh7b	-1.9029	0.00323783
Tmem150c	-1.82075	0.00955695			Cyp1a1	-3.88893	0.00323357
AU021034	-1.70276	0.00955565			Gab3	-1.4407	0.00323276
Ddx4	4.39858	0.00954862			C2cd4b	-3.04707	0.00323276
Ppp4r4	-1.31741	0.00954862			Efnb2	-1.63388	0.00323127
Wdfy2	1.07713	0.00954621			Fxyd7	-1.45526	0.00322339
Themis	-1.79799	0.00954621			Entpd5	-1.1369	0.00320622
Tmem171	1.48492	0.00952775			Asgr2	-1.30347	0.00320619
Tekt1	-1.16545	0.00950926			Noxa1	-2.3251	0.00320502
Dnm3	-1.11028	0.00950922			Agbl2	-1.82607	0.00319867
Sstr3	1.33165	0.00947492			Dlg3	-1.09476	0.00317801
Wt1	1.80994	0.00946323			Trmt2b	-1.03469	0.00317733
Ddah2	-1.31182	0.00946323			Ccdc141	-1.08983	0.00316805
Mia1	-1.38417	0.00946323			Lrp6	-1.20374	0.00314649
1810046K07Rik	-1.50128	0.00946323			Scgb1a1	-1.75761	0.00313638
Kcnrg	-1.57003	0.00944613			P4htm	-1.12685	0.00313567
Pttg1	1.23981	0.00943599			Fam19a2	-2.01315	0.00313374
Gm14085	2.51745	0.00943523			Car8	-3.02076	0.00311539
Ggnbp1	-2.20415	0.00943389			Rasl12	-1.2032	0.00311539
Amy1	-1.18964	0.00942351			Sox18	-2.04583	0.00311539
Naip2	1.65578	0.00941017			Prex2	-1.61116	0.00310478
Cd44	1.24236	0.00941017			Ptpdc1	-1.01778	0.00310354
Ascl3	1.95334	0.00937146			Ahr	-1.40174	0.00310354
Cldn11	-1.54975	0.00937146			N28178	-1.67309	0.00309215
Aldh1a1	-1.78251	0.00936448			Rnf207	-1.71642	0.00309002
Ttc39c	1.42839	0.00935293			Wdr72	-3.19161	0.00308519
Itga8	-2.7059	0.00932929			Srpk3	-2.19794	0.00308519
Plaur	1.55969	0.00932279			Atp13a4	-2.34818	0.00307708
Tnfrsf22	1.18986	0.00930407			Fcrl1	-1.84277	0.00307605
Atp1a3	1.49722	0.00930085			Dapk2	-1.25746	0.00307019
Slc14a1	-1.13536	0.00927693			Sorl1	-1.08162	0.00306026
Kndc1	-1.22236	0.00927693			C630004H02Rik	-1.10504	0.0030523
Tmem109	-1.28573	0.00927541			Pla2g2c	-2.3757	0.00304083
Rasa4	1.96847	0.00925788			Amy2a5	-1.88685	0.00303269
Ccdc15	-1.15116	0.00923927			Atp2a3	-1.86368	0.00303237
Aplp2	-1.18404	0.00923927			Fam43a	-1.12198	0.0030305
Wnt2	-1.9291	0.00923927			ND5	-1.28399	0.00302665
Ovgp1	1.10627	0.00922444			Wbscr27	-1.24999	0.00302195
Bbs2	-1.56065	0.00922444			Faim3	-2.28565	0.00300478
Lrat	-3.20235	0.00922444			Ppfibp2	-1.35196	0.00299849
Gm6522	1.65682	0.00921553			Gstm6	-1.71696	0.00298722
Ccdc122	1.37706	0.00921553			Bex2	-3.57352	0.00298298
Zfp563	-1.11877	0.00921553			Tsga10	-1.26657	0.00297467
Myh2	-1.11829	0.00919496			Slc38a5	-1.36548	0.00296817
Arg1	1.58621	0.00918122			Kcnu1	-1.68895	0.00296214
Ttbk1	-2.72675	0.00917406			Acacb	-1.0068	0.00295748
Mlf1	-1.16505	0.00916846			Abi3bp	-2.82447	0.00295569
Tmem151b	1.56341	0.0091654			Tspan33	-1.31852	0.00295466
D130043K22Rik	-1.08861	0.00914101			Mgl2	-1.0836	0.00295429
Cadm2	-1.27319	0.00912923			Nme3	-1.67655	0.00294741
Abcb1b	1.28354	0.00911304			Arap3	-1.62077	0.00294741
Lgi2	1.10992	0.0090923			Palmd	-1.39741	0.00293093
4922505G16Rik	2.79051	0.00909095			Hrsp12	-1.4776	0.00291112
LOC546061	1.5688	0.00908836			B020031M17Rik	-1.68495	0.00291112
Ier5l	1.04021	0.00908582			Stard8	-1.3384	0.00291112
Bmp6	-1.82604	0.00908172			Kif26a	-1.64854	0.00290923
Eno3	-1.16943	0.00908132			Enpp2	-1.59496	0.00290644
Spata18	-1.29827	0.00907963			Nkx2-1	-1.24449	0.00290607
1700113H08Rik	-1.64469	0.00907388			Slc16a5	-1.11771	0.00290534
Tlr2	1.54144	0.00907007			Tmem42	-1.32563	0.00290534
Rtn2	-2.64234	0.00907007			Rad51l3	-1.18656	0.00289731
2700081O15Rik	-1.01958	0.00905926			Rabgap1l	-1.3683	0.00288803
Col4a2	1.03066	0.00905458			Plagl1	-1.07819	0.00288803
Nfkbia	1.16758	0.00905286			Ift122	-1.08231	0.00288575
Ahsp	-2.89561	0.00904568			Spef2	-1.75577	0.00288016
Spnb2	-1.11641	0.00902261			Plch2	-2.58392	0.00288016
Klra17	3.27291	0.00898952			Sncaip	-1.99046	0.00287305
Amotl1	1.45081	0.0089607			Dnahc1	-2.27603	0.0028726
Kif26b	-2.26415	0.0089607			Dach1	-1.16046	0.00286769
Olfr849	-2.10871	0.00893641			Myh7	-2.55137	0.00286606
Crebl2	-1.29063	0.0089309			Wbscr25	-1.93496	0.00284135
Vldlr	-1.25422	0.0089271			E130309D14Rik	-2.06885	0.00283804
Klrk1	2.62226	0.00891194			Pla2r1	-1.79637	0.00283804
Esyt3	-1.60545	0.00890713			Fign	-1.79178	0.00283804
Pdcd1	1.70476	0.00890477			Fhit	-2.67689	0.00283804
Nr1h5	2.20227	0.00890307			Cldn3	-1.16937	0.00283337
Gatm	1.22917	0.00890307			Acpl2	-1.18418	0.00283297
Pcdh17	-1.26919	0.00890307			C1qtnf2	-1.21314	0.0028271
Fam53b	-1.07504	0.00889192			Gm7420	-1.63853	0.0028271
Wbp1	-1.09046	0.00889192			Stmn2	-1.61429	0.00280191
Inpp4b	-1.13591	0.00885192			Ysk4	-2.05458	0.00279962
Prodh	-1.33102	0.00884842			Tle6	-1.17487	0.00279256
Col14a1	-2.10936	0.00884842			Cdh29	-1.76136	0.00278272
Itgae	-1.74105	0.00884805			Endou	-1.33953	0.00278272
Cdc42bpa	-1.19923	0.00884244			E230028L10Rik	-2.95707	0.00277856
Pxmp2	-1.33883	0.00884005			BC031353	-1.53732	0.00277632
D630045M09Rik	2.90244	0.00882417			Plxnb1	-1.24128	0.00277632
Olfr550	-1.24528	0.00882218			Slc6a7	-1.16126	0.00277406
Gm6787	1.21063	0.00880998			Dhrs3	-1.88742	0.00276884
Gpr30	-1.34666	0.00880186			4930578N16Rik	-1.67085	0.00276655
Dhtkd1	-1.12237	0.00878443			Ppcdc	-1.05108	0.00276655
Rrp9	1.12538	0.00876909			Lifr	-1.3305	0.00275983
Glb1l3	-2.44537	0.00876568			Cmbl	-1.1881	0.00275983
Pou3f1	2.68353	0.00875752			D14Abb1e	-1.06786	0.00275508
Arhgef25	-1.09779	0.0087563			Ccdc121	-2.85453	0.00274768
4932443I19Rik	-1.12884	0.00874565			9330188P03Rik	-1.39509	0.00274384
Fbxl22	-1.02464	0.00874167			Ghrl	-1.59699	0.00274206
Cdca5	1.48893	0.00873579			Ebf1	-1.38034	0.00274068
Cyp1b1	1.46171	0.00873579			Msrb2	-1.21541	0.00270914
Uchl3	1.45323	0.00873579			Snx21	-1.14921	0.00270309
Rbp7	-1.62051	0.00873579			D830044I16Rik	-1.63301	0.00270014
Cyp2f2	-3.38509	0.00873579			Cdc42ep3	-1.03397	0.00268573
Lrrc10b	-1.30185	0.00869698			Lbx2	-1.12941	0.00268573
1700017B05Rik	1.41885	0.00869598			Trim2	-1.11203	0.00268573
Gbp10	1.97804	0.00869498			C630016N16Rik	-2.01412	0.00268236
Il17rd	-1.36723	0.00869498			2410004P03Rik	-1.47483	0.00265799
Pira6	1.98412	0.00867726			Wnt10b	-2.41574	0.0026565
Glrx	1.44677	0.00866047			Wfdc16	-3.4611	0.00265635
Dpysl2	-1.08791	0.00865375			Dner	-1.79574	0.00265476
LOC633417	1.81334	0.00864731			Ypel3	-1.84824	0.00265143
Pde8b	-2.15522	0.00863844			Nhlrc4	-2.30897	0.00264692
Tspan12	-1.75455	0.00863641			Mgst1	-1.39919	0.00263305
Gm10693	1.89924	0.00857993			Slc25a23	-1.22605	0.00263169
H2-Ke6	-1.08492	0.00857479			Klhdc8b	-2.14981	0.00262752
Wdr69	-1.71572	0.00857479			Sox4	-1.53874	0.00261791
Pate-e	-1.42445	0.00856726			LOC100047210	-3.12696	0.00261765
Nuak1	-1.45066	0.00856382			Cdh13	-1.23105	0.00260075
Gm9733	1.6894	0.00856343			Tcp11l2	-1.53919	0.00260075
Tmem220	-1.20582	0.00855539			Ccdc151	-2.36298	0.00260075
Calml3	-3.70754	0.00854539			Eml6	-1.59011	0.00260075
Ada	1.3094	0.00854273			Itpr2	-1.14994	0.00259009
I830077J02Rik	2.02699	0.00853848			Dpp4	-1.90338	0.00259009
Tspan18	-2.00733	0.0085044			Sox6	-1.39258	0.00258951
LOC100505078	1.69034	0.0085			Gm166	-1.01982	0.00258427
Clec4a4	2.91391	0.00848775			1700001L19Rik	-2.05179	0.00256761
Klk1b3	1.82277	0.00848775			4930485B16Rik	-2.37111	0.00255505
Ltb	-1.13139	0.00848307			Gm3552	-2.08977	0.00255505
Bcl7a	-1.61678	0.00848307			Olfr330	-1.46783	0.00255187
Il1rl1	-1.05322	0.00847567			Bik	-1.34286	0.00254956
Crygc	-1.18819	0.00847567			Ddc	-1.5842	0.00254885
Crocc	-1.30803	0.00846203			Emcn	-1.04289	0.00253541
Eno4	-1.56542	0.00845419			Itih2	-1.47855	0.00253541
Tcea3	-1.16766	0.00839433			Spag8	-2.12566	0.00252864
9430078G10Rik	-1.04442	0.00837654			6430573F11Rik	-2.67856	0.00252864
Sfrp4	-1.57749	0.00837405			Gimap6	-1.01228	0.00252703
Ampd3	1.92948	0.00837173			Mosc1	-1.30822	0.00252621
Bcl2l11	2.03381	0.00836423			Nudt11	-1.25641	0.00252293
Casp3	1.28596	0.00836423			Kbtbd3	-1.80621	0.00251284
Cd209b	-1.99672	0.00836285			LOC100502705	-1.65582	0.00250406
Actn1	1.43832	0.00835467			Gprasp2	-4.08187	0.00249239
Rassf1	1.13664	0.00835467			Gjb1	-1.35471	0.00249032
Epha1	-1.24578	0.00835467			Agr3	-1.97819	0.00247981
Eif2s3y	-2.22322	0.00835332			Irx3	-1.58237	0.0024769
Apof	2.45946	0.00835156			Fsip1	-2.08364	0.00246148
Gja1	1.20122	0.00834448			Glt25d2	-2.75994	0.00245247
Klk8	-1.00953	0.00831669			2410066E13Rik	-2.59169	0.00245247
B4galt5	1.04331	0.00829595			Plk5	-4.57868	0.00245247
Trat1	-1.0752	0.00829061			Lrrc50	-1.22849	0.00243449
Psrc1	1.71711	0.00828133			Kcnip4	-2.66541	0.00243449
Zc3h12d	1.20268	0.00828133			Capsl	-1.68349	0.00241822
4833427G06Rik	-1.05474	0.00828133			H2-Ob	-2.46617	0.00241796
Gata3	-1.09485	0.00827352			Tle2	-2.32254	0.00241073
Ypel1	-1.08061	0.00824186			Rsph10b2	-3.1559	0.00240455
Kcna1	-3.53715	0.00824186			Prrc2b	-1.17906	0.00240372
Upk1b	2.18061	0.0082385			Tst	-1.17209	0.00239776
Pign	-1.11096	0.00820577			Gprin3	-2.72568	0.00239241
Kdr	-1.42444	0.00820577			Tecpr1	-1.30518	0.00238261
Arhgap36	-1.72207	0.00820092			E030013I19Rik	-2.62042	0.00238
Slc28a2	3.00783	0.00817695			Bace2	-1.27259	0.00237357
Hepacam	-2.39244	0.00817695			Gpr98	-1.62839	0.00237095
Mctp2	1.53751	0.00816415			Zfr2	-1.44612	0.00236714
LOC100504710	-1.83355	0.00815058			Prss36	-1.162	0.00236547
Slc44a5	-1.82803	0.00812373			C1qtnf3	-1.45783	0.00236017
Oxct2a	2.93357	0.00810192			Dmkn	-1.05357	0.00235967
Coro2a	1.19966	0.00810176			Aldh6a1	-1.61227	0.00235967
BC027231	1.54806	0.00810136			Beta-s	-8.21278	0.00235967
Ttc22	1.58809	0.0081			Fam193b	-1.72002	0.00235967
Olah	-1.27991	0.0081			Tbx1	-2.25796	0.00235711
Pir	-1.17205	0.00809739			Swap70	-1.14631	0.00235711
Alk	1.80346	0.00808614			BC068157	-1.4914	0.00234641
Metrnl	1.21361	0.00808614			Irx5	-1.86342	0.00234394
1110020G09Rik	-1.22419	0.00804929			Arhgap39	-1.25159	0.00234347
Gm5084	-2.32624	0.00803878			Gpr126	-1.48532	0.00234311
A530032D15Rik	2.29974	0.00803348			Pink1	-1.05002	0.00233724
Tnfsf14	1.84123	0.00803348			Gm7173	-2.43288	0.00233232
Cttnbp2nl	1.23206	0.00803348			Izumo4	-1.95161	0.0023201
Tnfaip8l3	1.37171	0.00802691			Tmem80	-1.24446	0.00231526
Rab32	1.35327	0.00800924			Negr1	-1.38867	0.00231036
1700001L19Rik	-1.49961	0.00798533			2210021J22Rik	-1.3011	0.00230508
Echdc2	-1.40554	0.00798057			Arvcf	-1.97348	0.00230296
Batf2	2.80241	0.00796669			D130062J21Rik	-2.06916	0.00229384
Lrguk	-1.43692	0.00796127			ND4	-1.01177	0.00229384
Cbr1	-1.13647	0.00795882			D930001M23Rik	-1.98283	0.00229384
Angptl2	-1.93521	0.00795882			Gm13138	-1.38531	0.00229299
Clic6	-1.44091	0.00795137			Plp1	-1.2342	0.00229299
Il28b	3.39975	0.00790905			Zfp354b	-2.09908	0.00229099
Adamts1	1.02646	0.00789852			Fsd2	-1.23511	0.0022829
LOC668917	1.1476	0.00789013			Ccdc30	-1.99273	0.00227783
Slc4a1	-1.823	0.00789013			D630037F22Rik	-1.21916	0.00227285
Tank	1.0436	0.00787887			Ppp1r16a	-1.04022	0.00227219
Lrrc6	-1.07745	0.00786667			Aplp2	-1.29693	0.00227219
Dnmt3l	1.72768	0.00785197			Hpgd	-1.30177	0.00226933
Gm4076	-1.14208	0.00785131			Vwa2	-1.361	0.00225301
Satb1	-1.15217	0.00784627			Asgr1	-3.23554	0.00225301
Ccdc99	1.36313	0.0078316			Fhad1	-1.16722	0.00225077
Prm1	3.1423	0.00782967			Mamdc2	-2.80135	0.00224982
Aurka	1.17479	0.00782907			Enkur	-2.75601	0.00224982
E330016A19Rik	1.6457	0.00782285			Zbtb20	-1.32925	0.00224562
Ccnf	1.02015	0.00782285			Inmt	-2.17239	0.00224462
Zc3h12b	-1.05507	0.00782285			Cd36	-1.0485	0.0022444
Ccl3	3.15219	0.00781623			Bzrap1	-1.30263	0.00223382
Klk4	1.52261	0.00781623			Gm5103	-1.52379	0.00222892
Ctxn2	1.74661	0.00781597			Itih4	-2.85061	0.00222845
Kcnq2	1.31782	0.00781415			1810020D17Rik	-1.05217	0.00222364
Mgat3	-2.03771	0.00781415			Zmym3	-1.05858	0.0022105
Fcrl1	-2.72195	0.00781268			Pnliprp1	-2.74693	0.00220939
St6galnac6	-1.35268	0.00780949			Npr2	-1.01609	0.00220603
Ect2l	-2.03679	0.00780949			6430531B16Rik	-1.97403	0.00220307
Lmnb1	1.03046	0.00778017			9030025P20Rik	-1.17368	0.00220307
Slc7a3	1.28927	0.00776167			Atp6v0e2	-1.1305	0.00220307
Mpzl2	1.51583	0.00775908			Fhl1	-1.11995	0.00219508
Fbln7	-1.89934	0.00774588			Gng11	-1.37238	0.00219108
Ints6	1.83734	0.00774365			Wwc1	-1.00594	0.00218862
Olfr56	2.6045	0.00774283			Pcdh17	-1.28558	0.00218862
4930451C15Rik	-3.44052	0.00772535			Mecom	-1.94753	0.00218862
1110002B05Rik	-1.05637	0.00772526			Rgl3	-1.39856	0.00218862
Raet1c	2.65129	0.00772078			St6galnac3	-1.50274	0.00218862
Amica1	1.92371	0.00772078			Trim62	-1.00722	0.00218825
Tead4	1.20021	0.00771812			Ribc1	-1.20715	0.00218279
Kcna2	-2.76786	0.00768907			Sesn1	-1.17731	0.00218176
A430084P05Rik	2.58532	0.00766904			Mgst2	-1.61954	0.00217993
Gm5150	2.44094	0.00766904			LOC100503983	-2.22815	0.00217312
Gm14548	2.00916	0.00766904			E330018M18Rik	-1.66653	0.00216725
Cbx2	-1.23942	0.00766904			Esm1	-3.37752	0.00216202
Ephx1	-2.20853	0.00766736			Wdr16	-1.30162	0.00215829
Cd300a	1.2613	0.00765056			Elac1	-1.03703	0.00215466
Ift80	-1.02513	0.00765056			Micalcl	-1.68123	0.00215466
Ces1d	-2.34677	0.00764478			F2	-2.43591	0.00215466
Clk1	-1.04194	0.00763918			Gtf2a1l	-1.07485	0.00215466
Tmem221	2.4614	0.00762055			Cd55	-1.20045	0.00215168
Clec4a1	2.32696	0.00762055			Crocc	-1.52413	0.00214604
P2ry6	1.15891	0.00762055			Calcoco2	-2.08162	0.00214604
Ntrk3	-1.68579	0.00762055			Fam82a1	-1.23068	0.00214604
Folr1	1.50362	0.00761671			Ppp1r9a	-2.39934	0.00214604
Pilrb1	1.53572	0.00760241			Pvrl3	-1.37795	0.00214589
Gcnt2	1.21554	0.00758468			Tnxb	-1.89596	0.00213022
Mpped2	-1.46797	0.00758169			Szt2	-1.02905	0.00210995
Slc2a6	1.9448	0.00757838			Agrp	-2.37901	0.00210748
Apol7b	1.44241	0.00757838			D630013G24Rik	-2.76801	0.00210748
Plcxd2	1.16919	0.00757838			1700007G11Rik	-1.89604	0.00210578
Tmem79	1.07654	0.00757838			Ddb2	-1.1404	0.00210397
Nags	-1.68918	0.00757838			Nckap5	-1.22286	0.00210128
Mtss1l	-2.04805	0.00757838			H2-Ke6	-1.42296	0.00210088
Awat1	2.12965	0.00757273			Hsd3b2	-1.11134	0.00208035
BC057022	-1.55247	0.00757273			Ace2	-1.74322	0.00207992
Fam13a	-2.07185	0.00757273			Iqch	-2.00212	0.00207881
2610002D18Rik	3.62779	0.00755549			Prdm8	-2.4595	0.00206387
Ctgf	1.08256	0.00755549			Prpf40b	-1.23883	0.00205358
2310010J17Rik	-1.12828	0.00755549			F830223B06Rik	-1.19335	0.00204964
Ppil6	-2.14096	0.00755549			Cdh2	-1.06006	0.00204786
Adrb1	-1.20024	0.00754793			Cetn4	-1.13873	0.00204681
Nhlh1	2.04735	0.00752903			Synm	-2.88308	0.00204401
Tstd1	-1.31357	0.00752903			1810010H24Rik	-2.12079	0.00204274
Zfp354c	-1.38308	0.00752903			Cmtm2b	-1.105	0.00204274
Adam28	-1.71962	0.00752903			Abca8a	-1.88523	0.00204236
Slc1a6	1.56554	0.00752237			Tcea3	-1.66689	0.00204236
N4bp1	1.56328	0.00748774			Kifc2	-2.79474	0.00204214
Ramp3	1.29605	0.00746496			LOC100047702	-1.4636	0.0020355
Cks2	1.07631	0.00746395			Mapt	-2.10803	0.00203378
Ptprt	-1.38431	0.00746111			Spry1	-1.2701	0.00202687
Oxct1	-1.18426	0.00745352			Tmem201	-2.71962	0.00202305
Unc5cl	-1.77302	0.00745146			Mapk12	-1.00403	0.00201352
Alpl	1.4938	0.00744432			4930579J09Rik	-1.61676	0.00201244
Snrnp35	1.0191	0.00742866			2210020M01Rik	-1.32588	0.00201244
Snx10	1.8612	0.00741579			Sec14l4	-2.20112	0.0020072
Fcer1g	2.12161	0.00741109			Ermn	-1.68848	0.00200682
Atp8b5	-1.40494	0.00741109			Zfp292	-1.06205	0.00200452
Cd33	1.78106	0.00740969			Gm1661	-2.58848	0.00200444
Trim14	1.58905	0.00739884			Ypel1	-1.45152	0.00200444
Sh3bgr	-1.9506	0.00739501			Mlf1	-1.65575	0.0020026
Mafb	2.05172	0.00738277			Ctnnal1	-1.02316	0.00200074
Kcnk12	-2.1371	0.00735799			Ogt	-1.49915	0.00199425
Gm10050	-3.10768	0.00735697			Mtx3	-1.07352	0.00198776
Dnahc11	-1.25895	0.00735153			Tmem205	-1.21214	0.00198229
Zfp423	-1.12895	0.00734503			Calml4	-1.80524	0.00198229
Tmem106b	-1.08194	0.00731503			LOC100504975	-1.05752	0.00197637
Bche	-1.67076	0.0072958			Frat1	-1.01905	0.00197595
Ms4a4d	1.2988	0.00728096			Zfp503	-1.11733	0.00197542
Serpinb5	2.66114	0.00727193			Ddx26b	-1.2302	0.00197542
Nmral1	1.52921	0.00727193			Cybrd1	-1.60026	0.00196804
Gm10549	-1.15099	0.00727193			Sepp1	-1.50033	0.00196693
Hmcn1	-2.35844	0.00727034			Slc25a36	-1.09396	0.00196038
Styxl1	-1.51345	0.00726919			Phf1	-1.24171	0.0019586
Gpr183	-1.54737	0.00726919			Fam161b	-2.16354	0.0019586
Col16a1	-1.08451	0.00726426			Kif13a	-1.128	0.00195255
Krtap4-1	-1.08283	0.00726236			Nipal3	-1.3184	0.00195093
Adam5	-1.20988	0.00724924			Ces1d	-2.25249	0.00194885
She	-1.34859	0.00722948			Rem1	-1.11761	0.00194371
Sdcbp2	2.24196	0.00721538			Ccdc42	-1.08952	0.00194371
Pnp	1.62971	0.00721538			Fam154b	-3.33327	0.0019409
Ccdc30	-1.09037	0.00721538			Fbxl13	-3.02904	0.00193721
Cdh4	-1.51178	0.00719667			4833427G06Rik	-2.12395	0.00193721
Klhl23	-1.08655	0.00717172			Pcdhac2	-2.7451	0.00192039
Slfn5	1.8169	0.00716804			Klhl38	-1.72259	0.00192026
Plat	1.79881	0.00716804			1110034G24Rik	-1.31012	0.00191561
C1qa	1.30777	0.00716804			1700029J07Rik	-2.4097	0.00191162
Klhl31	-1.71297	0.00716804			Pabpc6	-1.62594	0.00190762
C130050O18Rik	1.25427	0.00715716			Akap8	-1.08179	0.00188887
Mcoln2	1.84054	0.00715434			Fam110a	-1.2693	0.00188818
Gm22	1.46925	0.00715434			Mmp15	-1.89685	0.00188623
Trim29	1.14175	0.00715434			Cyp39a1	-1.34954	0.00188623
1700008A04Rik	-2.50449	0.00715434			Greb1	-3.00898	0.00188337
Cyp4f15	-3.41902	0.00714486			BC065397	-1.58621	0.00187933
Nfib	-1.10573	0.00714452			Id4	-1.65823	0.00187933
Pycard	1.46345	0.00713998			Hba-a2	-5.80415	0.00187933
Fbln5	-1.23944	0.00713773			Rab6b	-2.32416	0.00187933
Sgcg	-1.00184	0.00711945			Tspan2	-1.281	0.00187568
Prex2	-1.27825	0.00711937			Ccdc85a	-1.4012	0.0018643
T2	-3.30616	0.00711817			Vstm2a	-1.4385	0.00186375
LOC100505237	-1.00269	0.00711213			Plxdc2	-1.28325	0.00185746
Ttc9	1.20238	0.00710875			Txndc8	-2.27962	0.00185013
Cd180	2.78232	0.00710268			Pde8b	-2.67806	0.00184564
Lrrc17	-3.56453	0.00710268			Gabarapl1	-1.04115	0.00184228
Sgol2	1.08545	0.00709132			Elmod1	-2.01829	0.00183678
Mapk1ip1	-1.15989	0.00707602			Trpm1	-1.62527	0.0018294
4930485B16Rik	-1.21849	0.00707602			1700003E16Rik	-2.05808	0.00182939
Arhgef12	-1.12764	0.00707419			Macf1	-1.48223	0.0018177
Csdc2	-2.46751	0.00707419			Mcf2l	-1.58373	0.00181533
Olfr1006	-2.83234	0.00707419			Ddx5	-1.60415	0.00181533
C130026I21Rik	2.18278	0.00707225			Txlng	-1.34613	0.00181267
Acrbp	-1.39682	0.00707052			Tnn	-1.13963	0.00181172
Fsip1	-1.20416	0.00706844			Eml2	-1.00735	0.00181172
Gm9885	-1.9623	0.00705825			Rnf167	-1.63597	0.00181141
Fam107a	-1.06835	0.00704237			Gm5480	-1.0467	0.00180899
Fam26f	3.48315	0.00702153			Vsig2	-1.13617	0.00180864
Zfp458	1.22046	0.00700963			Higd1b	-1.12844	0.00180864
Ms4a18	1.87711	0.00697346			Tmem220	-1.70465	0.00180496
C330011M18Rik	-1.08387	0.00697346			4921506M07Rik	-2.08906	0.00179746
2310015B20Rik	-1.57808	0.0069682			Caprin2	-1.14138	0.00179746
Rhoc	1.20131	0.00696584			Ccdc42b	-1.1523	0.00179682
Gstm1	-2.62426	0.00696454			Aplnr	-2.21512	0.00178769
4932415M13Rik	3.5459	0.00695938			Crip3	-2.49533	0.00178345
Nrg1	1.46943	0.00695804			Efcab10	-2.89665	0.00177963
Cda	1.1044	0.00695444			Sema6a	-1.49628	0.00177605
P2ry13	1.97134	0.00694645			Nrn1	-3.11117	0.0017732
AI662270	1.15979	0.0069378			Efcab5	-2.04195	0.0017732
Akr1b7	-1.21537	0.00693418			Phactr2	-1.18884	0.0017722
Syt15	-1.88422	0.00693418			Hdac5	-1.19877	0.00176637
AB041803	-1.28338	0.00692693			2810453I06Rik	-1.70894	0.0017582
Mars2	1.21125	0.00691576			Nlrp1a	-1.20858	0.00175204
Gstm4	-1.85203	0.00690605			Agap1	-1.53598	0.00175011
Rhox4a	1.05353	0.00689951			Wdr78	-2.4059	0.00175011
Celsr3	2.46436	0.0068885			Kiss1	-1.95445	0.00175011
Enc1	1.80473	0.00688693			Snhg11	-2.74292	0.00174918
1810033B17Rik	1.24098	0.00687335			D130043K22Rik	-2.27728	0.00174573
Ndrg2	-1.65752	0.00687335			Kiss1r	-1.03446	0.00174573
Wdr78	-1.348	0.00686315			Akap8l	-1.42837	0.00174573
Acadm	-1.34897	0.00686315			Hes1	-1.24495	0.00174573
4833422F24Rik	3.48964	0.00685771			Ezh1	-1.23831	0.00174573
C1qb	1.54565	0.00685216			Six4	-1.4041	0.00174573
Sfn	2.18005	0.00685			Ids	-1.09372	0.00174005
Chi3l3	1.29004	0.00685			B930049P21Rik	-1.47473	0.00172719
Olfr740	-1.93459	0.00685			9130015G15Rik	-2.72569	0.0017266
Itlnb	1.40211	0.00684272			Rpgr	-1.30344	0.00172297
Zfp882	-1.32181	0.00684272			Sall2	-1.00999	0.00171953
Robo2	-1.86405	0.00684272			Grb7	-2.19895	0.00171953
Sall2	-1.3471	0.0068398			Emb	-1.05535	0.00171867
Gpnmb	2.23849	0.00683936			Myct1	-1.11224	0.00170978
Tapbpl	1.52943	0.00681923			Tmem14a	-1.82667	0.00169113
Ccbl1	-1.53638	0.00681846			Ank3	-1.77695	0.00168293
Rgs1	3.41658	0.00681746			Fam179a	-1.59704	0.00168207
Gm13969	-1.25267	0.00679399			Klhl13	-1.56885	0.00168207
Scgb3a1	-5.60418	0.00679399			Thap3	-1.33943	0.00168207
C3	1.27923	0.00676342			Irs1	-1.82058	0.00167441
Dck	2.21889	0.00675663			Ttc21a	-1.94472	0.00167028
Arl11	1.45211	0.00672372			Inadl	-1.0511	0.00166338
D130050E23Rik	1.02037	0.00671385			Faah	-1.42738	0.00166311
Lilra6	1.84417	0.00670832			Ttll9	-3.4481	0.00166311
Dusp5	1.47782	0.00670832			Adcy1	-2.29159	0.00166096
Chd3	-1.4155	0.00670832			Aptx	-1.18038	0.00166004
Gm1987	-1.43092	0.00669298			Iqub	-1.70864	0.00164422
BC106175	1.39198	0.00668579			2900054C01Rik	-1.26699	0.00164383
Gucy1a3	-1.40115	0.00668331			Dnahc2	-2.52486	0.00164039
Ushbp1	-1.63762	0.00668331			Sdc2	-1.17837	0.00163936
Opn1sw	2.19239	0.00668169			Ccdc19	-1.58198	0.00163117
Pdlim7	1.06208	0.00668169			Spata17	-2.46837	0.00162917
Neb	1.07297	0.00668054			Ctdspl	-1.24829	0.00162776
Kcns3	-1.50428	0.0066795			4932443I19Rik	-2.46075	0.00162776
Fcer1a	-1.43582	0.00667102			Slc22a17	-1.58297	0.00162776
Gm7160	1.41203	0.00667037			Gm5148	-2.46404	0.00162776
Ppy	3.15514	0.00664496			Myo6	-1.42984	0.00162776
Ccrl1	-5.05661	0.00663663			Tprgl	-1.08248	0.00162776
Pstpip1	2.35248	0.00663582			Gabrp	-2.56733	0.00162689
Eif4e1b	2.29236	0.00661291			Tmem8b	-1.12091	0.00162689
Ttll6	-1.06536	0.00661013			Echdc2	-1.48975	0.00162626
BC094916	3.14183	0.00660186			Armcx1	-1.26521	0.00161485
Tgm2	1.6294	0.00660186			Gpt	-2.33414	0.00160872
Ndufa4l2	-1.57047	0.00660186			Bmx	-1.2455	0.00160872
Alpk1	1.49757	0.00658427			Efemp1	-1.99814	0.00160872
LOC100505163	1.89858	0.00657372			Kif27	-1.96277	0.00160872
Acta2	-1.12055	0.00656801			1700040L02Rik	-2.82415	0.00160872
Mmp25	3.68793	0.00656644			4732414G09Rik	-2.49942	0.00160526
Mgll	-1.08073	0.00656644			Arhgef12	-1.26854	0.00160236
LOC100502705	-1.32534	0.00656644			Spnb2	-1.40098	0.00159935
Tekt4	-1.31491	0.00656235			Cyyr1	-1.57629	0.00159935
Gm4146	-1.4435	0.00656235			Ccrl1	-5.67302	0.00159074
Ptch1	-1.02882	0.0065567			Tsnaxip1	-3.97674	0.00158534
Aass	-2.68108	0.00654638			S100g	-3.43597	0.00158478
Fap	2.52057	0.00654455			Eif4a2	-1.39715	0.00158478
Gm5039	2.2613	0.00653381			Ces1g	-4.17849	0.00158209
Atp10a	1.37632	0.00652761			Wnk2	-1.40198	0.00158127
Lca5l	-1.64083	0.00651025			Gm11992	-2.21883	0.00158123
Cxcr5	-1.99894	0.00651025			4930404N11Rik	-1.71867	0.00158123
Ptpru	-2.33743	0.00651025			Ccr6	-2.64876	0.00155747
2410125D13Rik	-1.40161	0.00650315			Fam81a	-1.8156	0.00155731
Smarca2	-1.65087	0.00650315			Gtl3	-1.03919	0.00155094
Fst	3.08117	0.00650126			Riiad1	-2.57395	0.00155094
Anxa1	1.09334	0.00650126			Spata18	-1.53373	0.00154879
Nlrp5	-1.3122	0.00650126			Pitpnm3	-1.70809	0.00153672
Tekt2	-1.63473	0.00648324			Slc30a2	-1.02744	0.0015351
Endog	-1.15932	0.00647428			Itpr1	-1.14883	0.0015351
Reps2	-1.63471	0.00645977			Slc28a3	-1.07496	0.00153426
Lst1	1.77633	0.00645495			Spag16	-3.64109	0.00152481
Ebf1	-1.01826	0.00645495			Tmem231	-1.06717	0.00151721
Micalcl	-1.07521	0.00645495			Gstz1	-1.75316	0.00150726
Notch3	-1.18811	0.00645095			Tmie	-2.10964	0.00150512
Xcl1	2.77651	0.00644871			Lrriq3	-1.69973	0.00149852
Asf1b	1.29155	0.00644871			Cdc42bpa	-1.13092	0.00149672
Gpr174	-1.29325	0.00644871			Ubxn11	-1.38277	0.00149672
Espn	-1.31794	0.00644871			Rcan2	-1.44597	0.001487
Dbndd1	-1.54233	0.00644871			2310034G01Rik	-2.03797	0.00148232
Adh1	-2.06119	0.00644871			Gstm2	-1.06733	0.00148103
Fa2h	1.92346	0.00644859			Ttc30b	-1.83664	0.00148053
Rasl12	-1.21348	0.00643163			Hmg20a	-1.23535	0.00148028
Cd96	-1.46957	0.00641825			Vtn	-1.81074	0.00147822
Gzmb	2.91246	0.00639957			Styxl1	-2.66091	0.00147822
Cbx7	-1.33811	0.00639957			Lrrc6	-2.28503	0.00146804
1700013F07Rik	-1.07287	0.00639098			Pnma2	-1.74081	0.00146804
Hsf5	1.97175	0.00638891			Zmynd12	-2.33255	0.00146383
Relb	1.06314	0.00638769			Grik3	-1.90784	0.00146272
Inpp5k	-1.08075	0.0063688			Nit1	-1.18834	0.00145975
Tspan13	-1.71685	0.0063688			D19Ertd652e	-2.37141	0.0014593
Tlr7	1.77766	0.00635908			Zmym5	-1.31503	0.00145793
Nts	1.36254	0.00635908			Tekt1	-2.06353	0.00145584
Bik	-1.03342	0.00635908			Tmem109	-1.35681	0.00145414
1700016K19Rik	-1.09748	0.00635908			Faim2	-3.63455	0.00145387
Lhx6	-1.50993	0.00635908			Cat	-2.03307	0.0014462
Npas2	-1.77797	0.00633423			Rab17	-2.07039	0.00144391
Slc25a23	-1.12226	0.00633351			Dnahc7a	-1.11336	0.00143879
Tmem121	1.04004	0.00632273			1700045I19Rik	-2.18508	0.00143781
Dhrs9	2.686	0.00632172			Hoxa5	-1.19631	0.001433
Itga3	1.4436	0.0063069			Slco2b1	-1.12241	0.00142635
Dll1	1.74582	0.00630426			Ttc34	-1.53524	0.00142635
Gm12695	-1.79042	0.00630426			Slc23a1	-3.02793	0.00142635
Havcr2	2.07334	0.00630383			Thbs3	-2.76889	0.00142635
Tcirg1	1.27317	0.00628138			Clic6	-1.88599	0.00142635
1810011O10Rik	-1.24064	0.00628062			Thrb	-1.30069	0.00142635
Cd97	-1.25693	0.00627497			Ddo	-1.95765	0.00142635
Mamdc2	-3.33646	0.00626371			Slc6a20a	-2.85368	0.00142635
Gm2155	-1.84226	0.00625743			Lrrc45	-1.44551	0.00142193
Ly6c1	2.1623	0.00625668			Rdm1	-2.57065	0.0014179
Blvra	1.16367	0.00625383			Dapk1	-1.29789	0.00141677
1190002H23Rik	1.84673	0.00624691			Oaz2-ps	-1.22253	0.00141617
Tril	-3.75363	0.0062383			LOC100503757	-1.09427	0.00141617
Fndc1	-1.49547	0.00622978			Hes2	-2.26478	0.00141617
Exo1	1.6128	0.00622839			Ak8	-2.35038	0.00140931
Slc15a3	2.44302	0.00620267			1700057G04Rik	-1.47103	0.00140931
Gimap3	-1.07166	0.00619341			Pdzd2	-2.09203	0.00140505
Ripk1	1.32289	0.00619144			Rasd2	-1.25474	0.00140009
Rsph4a	-1.5344	0.0061781			Rsph9	-1.51334	0.0013957
Gm9376	2.76045	0.00616605			Muc5b	-3.92382	0.00139494
Lpar1	1.29969	0.00616561			Slc44a3	-1.02106	0.00139494
Gnl3	1.23709	0.00614703			Irf2bp2	-1.05318	0.00139494
9030224M15Rik	-2.05498	0.00614703			D630042P16Rik	-1.21082	0.0013913
1300002K09Rik	2.96196	0.0061371			Daf2	-1.46005	0.00138634
Cilp	-2.641	0.00613562			Dnajb13	-2.4556	0.00138591
Grp	-1.97433	0.00613438			Zbtb4	-1.15089	0.00138489
Enpp4	1.17536	0.00613319			Casz1	-2.27256	0.00138484
Tmc7	1.04941	0.0061264			Ugt8a	-2.2525	0.00138384
Cmbl	-1.42414	0.00612495			Zmynd11	-1.00287	0.0013811
Prdm6	-1.39724	0.00608323			Scn3a	-2.90061	0.00137791
Pltp	-2.35098	0.00608271			Igfbp6	-2.57416	0.00137791
Abhd14b	-1.53445	0.00607659			Crisp3	-2.89474	0.00137652
Mafk	1.00965	0.00606851			Tekt4	-2.19708	0.00137605
Pik3c2g	-2.2051	0.00606851			2210411A11Rik	-2.01319	0.00137605
Muc19	1.51149	0.00605673			Fam190a	-1.25005	0.00136676
Scrn1	1.20932	0.00605673			5730416O20Rik	-2.63724	0.0013637
1700091H14Rik	-3.57143	0.00605344			Il11ra1	-1.16376	0.00136088
Hacl1	-1.38215	0.00604344			H2-Q1	-3.5926	0.00135442
Mndal	1.62331	0.0060434			Kif9	-1.46691	0.0013473
Ncoa7	1.55526	0.0060434			Ccdc13	-1.7552	0.0013473
Hpdl	1.40583	0.0060434			Tmem212	-2.79116	0.0013473
Tcf21	-1.6849	0.0060434			Crebl2	-1.66308	0.0013473
Mycbpap	-1.90783	0.0060434			Gkn1	-2.29494	0.0013455
Bid	2.04133	0.00602938			Gm11545	-2.86439	0.0013386
Ralgps2	-1.09172	0.00601404			Adrb1	-1.88327	0.00133675
Gm6566	1.31456	0.00600999			Thra	-1.63755	0.00133419
Sema6b	1.56994	0.00600232			Pir	-1.41826	0.00133419
Nod2	2.10441	0.00598312			Efcab4a	-1.70258	0.00132437
Frat1	-1.14612	0.00597188			Cdadc1	-1.01361	0.00132437
Xrcc3	1.10854	0.00596358			Gchfr	-1.51393	0.00131537
Cttnbp2	-2.05045	0.00595272			Hepacam	-2.64188	0.0013102
Gm5068	1.00494	0.00595098			Hist2h2aa1	-1.36879	0.0013102
Emilin2	1.88861	0.00592838			Bmf	-1.58607	0.00130619
Ftsj3	1.0253	0.00592459			Cetn2	-1.202	0.00128851
6720401G13Rik	-1.81435	0.00591951			5830428M24Rik	-3.27563	0.00128842
Kifc2	-2.33164	0.00591951			E030019B13Rik	-2.29349	0.00128593
Klk1b26	2.50597	0.00590582			Slc7a4	-1.66607	0.00128305
Tmigd1	-1.17285	0.00590301			Inpp5k	-1.17326	0.00127509
Aim1	1.61427	0.00589572			Sned1	-1.93417	0.00127416
E230019M04Rik	-1.06158	0.00589235			1810019D21Rik	-1.41732	0.00127206
BC028528	-1.14806	0.00589235			Limch1	-1.08925	0.00127136
ND5	-1.09636	0.00587953			Bmp6	-2.28995	0.00126816
Fhl1	-1.49036	0.00587953			Wfdc2	-1.27389	0.00125875
Dcp2	1.89696	0.00587623			Rgs11	-3.07921	0.00125652
Hif1a	1.36226	0.00587133			Ccdc147	-2.30318	0.00125435
Gng12	1.35576	0.00586671			Upk2	-3.70541	0.00125435
A230072C01Rik	-1.53214	0.00586671			Ifnk	-1.39285	0.00125435
Slc39a8	1.14764	0.00585676			Adamts5	-1.22288	0.00125435
D19Ertd652e	-1.47787	0.00583905			Neurog1	-2.554	0.00125435
LOC100504975	-1.64495	0.00583905			3830431G21Rik	-2.58351	0.00125339
Adrb3	-3.76038	0.00582579			Entpd8	-3.40142	0.00125339
H2-M3	1.35369	0.0058173			Ablim2	-1.32932	0.00125198
Ripk3	1.40259	0.00581513			Cbr1	-1.10082	0.00124969
Neurog1	-1.97318	0.00581513			Mia1	-1.80781	0.0012488
Mpz	-1.58513	0.00581015			Hbb-b1	-8.87771	0.0012488
Slamf9	1.84851	0.00580901			Pcolce2	-2.91267	0.0012488
Rtn1	-1.74812	0.00580901			6330439K17Rik	-2.40826	0.00124655
LOC100046950	-1.40618	0.00580815			Ankzf1	-1.1642	0.00124655
Taf1d	1.08545	0.00580755			Ednrb	-1.70517	0.00124336
Pih1d2	-1.0474	0.00580477			Abhd14b	-1.57523	0.00124238
Gm4841	5.88397	0.00579349			Ccdc135	-1.76118	0.00123871
1500012F01Rik	1.45723	0.00579349			Nfib	-1.23589	0.00123571
Hhla1	1.22455	0.00579135			Glcci1	-1.39136	0.00123255
Tmem87a	-1.02454	0.00579135			1700012D14Rik	-2.0102	0.00123255
Gamt	-1.34681	0.00576424			Krt23	-1.91424	0.00123255
Caprin2	-1.12905	0.00576185			Rasef	-1.34609	0.00123255
Sphk1	1.71085	0.00573976			Morn1	-1.95506	0.00123255
Fam159a	-2.67892	0.00573857			Prickle1	-1.59229	0.00123255
Lama2	-1.5476	0.00572637			Efna1	-1.39694	0.00123255
Rsph1	-1.6263	0.00572637			Cmtm8	-1.92815	0.00123181
Prss46	3.54661	0.00572393			Gm15762	-2.1088	0.00123181
Kif21b	-1.20479	0.00572393			4930556M19Rik	-1.66993	0.00123181
ND4L	-1.26816	0.00572062			Sec14l3	-2.46314	0.00122865
Pcdh12	-2.35138	0.00570103			Gm5878	-1.36626	0.00122677
Klhl14	-3.23787	0.00567634			Rph3al	-1.70723	0.00122624
A530001N23Rik	-2.25716	0.00564548			Clmn	-1.80674	0.00121614
Myc	2.64284	0.00564186			Dock6	-1.34394	0.0012093
Ccdc162	-1.60768	0.00562889			Tmem232	-4.12554	0.00120376
Proc	-1.31231	0.00562358			Baiap2l1	-1.31435	0.00119858
Efhd2	1.19966	0.0056205			Alas1	-1.23225	0.00119494
Mtus1	-1.00405	0.00561263			Rtdr1	-4.19244	0.00119239
Appl2	-1.56098	0.00561263			Arhgdig	-1.2304	0.00117858
Enkur	-1.44128	0.00561137			1700019L03Rik	-3.24487	0.00116803
Hhip	-2.14942	0.00559375			4930455F23Rik	-1.66343	0.0011671
Hr	-1.46783	0.00559253			Lrrc10b	-1.68635	0.00115879
Actc1	-2.11146	0.00559253			Dnahc5	-3.20822	0.0011587
Pla2g2d	-1.36888	0.00558113			Abtb1	-1.14291	0.0011587
Aspn	-1.85801	0.00557898			Wdr93	-3.44893	0.0011587
Glb1l2	-2.1324	0.00557012			Snca	-4.07124	0.00115834
Zfp352	-1.18693	0.00556527			4930451C15Rik	-3.84837	0.00115834
Ets1	-1.00557	0.00555781			Gpr116	-1.16148	0.00115834
Slc37a2	2.32829	0.00555383			Rnf186	-2.68877	0.00115834
Wnt7b	1.90378	0.00555383			Spa17	-2.13252	0.00115094
Gm14005	1.85568	0.00555383			C030048H21Rik	-3.00718	0.00114742
Limch1	-1.3448	0.00555383			Chadl	-1.43045	0.00114627
Chmp4c	1.01679	0.0055387			Nek5	-2.27903	0.00114627
B230344G16Rik	-1.0597	0.0055387			4932411N23Rik	-1.85951	0.00114627
Arsk	-1.15714	0.00553237			Hdc	-1.09173	0.00114295
Evc	-1.31225	0.00553237			Dnahc10	-3.86249	0.00113766
ND2	-1.4062	0.00552658			Mllt6	-1.10463	0.00113762
Gm5486	1.82547	0.00552024			Gm5918	-2.24516	0.00113697
Osm	3.0301	0.00551826			Gm6792	-3.51109	0.00113697
Slc2a4	-2.24054	0.00551819			Ces2b	-3.67342	0.00113697
2900006K08Rik	-1.54788	0.00551676			Ttc39a	-1.26725	0.00113111
Kit	-1.66339	0.00551312			Maob	-1.98196	0.00112941
Gm13889	1.10194	0.00549313			Fank1	-2.18245	0.0011201
Rad23b	1.00885	0.00549229			Morn5	-2.65554	0.00111705
St8sia6	-1.52483	0.00549229			Pigp	-1.03053	0.00111377
Gbp11	2.5657	0.00549002			Dyx1c1	-1.19442	0.00111377
Ankfy1	2.05913	0.00548802			Megf6	-2.08833	0.0011099
Ifna5	1.97596	0.00548276			Son	-1.00735	0.0011088
Tor1aip1	1.80092	0.00546868			Tbc1d30	-2.5375	0.00110772
Cenph	1.25254	0.00546868			Lmbrd1	-1.04179	0.00109119
Rassf9	-1.10316	0.00546868			Ttc8	-1.1041	0.00109119
Pcgf5	1.26867	0.00545762			Hbb-b2	-8.59223	0.00109119
Stard9	-1.47998	0.00545326			Fam47e	-1.98824	0.00109119
Ppap2b	-1.13601	0.00545172			Fam46c	-1.92728	0.00109119
Klra2	2.64785	0.00543577			LOC100503880	-1.34193	0.00109119
Slc36a3	2.60953	0.00543577			Slc22a18	-1.09536	0.00109119
Gstm3	-1.86109	0.00543577			Gigyf1	-1.29572	0.00109119
Kcnmb2	-2.09735	0.00543577			1500026H17Rik	-1.789	0.00109119
2310057B04Rik	-2.79047	0.00543577			Efcab6	-1.94753	0.00109119
Nnt	-1.01172	0.00541564			Ankrd50	-1.04213	0.00109119
Ms4a14	2.7582	0.00540969			Sdpr	-1.97156	0.00109119
LOC628110	-1.25755	0.00538337			Sfrs18	-1.54113	0.00108421
Efcab1	-1.53089	0.00537162			Kdr	-1.88753	0.00107713
Ypel2	-1.20267	0.00535953			Dydc1	-2.89342	0.00107373
Ranbp17	-1.57636	0.00535141			Ift81	-1.54419	0.00107373
Fmnl2	1.78798	0.0053412			Ly6g6d	-1.55768	0.00106694
Usp25	1.07187	0.0053412			Wdr69	-4.01322	0.00106694
2810405K02Rik	-1.12222	0.00533687			Rgs22	-2.59149	0.00106287
Mcm6	1.03214	0.00532787			Dync2li1	-1.31833	0.00106287
Igfbp3	-1.88403	0.0053256			Rtkn	-1.21896	0.00106287
Stmn2	-2.00115	0.00532344			Srcin1	-2.50589	0.00105932
Adam8	1.99328	0.00532251			Ankrd44	-1.14909	0.00105812
Bend5	-1.046	0.00531853			LOC100504561	-1.89759	0.00105707
Gbp7	2.4095	0.00530949			Kndc1	-2.1417	0.00105707
Sat2	-1.1568	0.00530949			Spef1	-1.67287	0.00105548
9530091C08Rik	-1.91235	0.00530949			Cdkl4	-1.10449	0.00105512
Syce1	2.92605	0.00530384			Utrn	-1.43983	0.001046
Acpl2	-1.03293	0.00530264			Kcnrg	-2.4246	0.00104546
Psmb9	1.4824	0.00529643			Aldh1a1	-1.95844	0.00104493
Dnaja4	-1.22954	0.00528566			Ssbp3	-1.06757	0.00104493
Tmem106a	2.18787	0.00528566			Efhc1	-2.53312	0.00104493
Glrp1	2.28856	0.00527513			Clstn3	-1.20343	0.00104031
Ccr1l1	4.25445	0.00527376			Dnali1	-3.61571	0.00104031
Mmp11	-1.3809	0.00526909			Gm221	-2.1626	0.00104031
Ctnnd2	-1.33747	0.00526675			Zbtb44	-1.65956	0.00103883
A030014E15Rik	2.53448	0.00526507			Fmo1	-1.9277	0.00103883
Raver2	-2.03727	0.0052595			Grhl2	-1.14256	0.0010383
Zc3h12a	1.34059	0.00523461			Armc3	-2.35678	0.00103291
Acot6	-1.06735	0.00521873			Bnipl	-1.55873	0.00103291
Clec4f	1.84611	0.00521217			Fgfr3	-1.4179	0.00103291
Wdr52	-1.42373	0.00521217			Slc16a11	-3.42206	0.00103291
1700016J18Rik	-2.54491	0.00521217			4933439C10Rik	-1.58824	0.00103291
Sox9	3.0911	0.00519957			Pnck	-1.8315	0.00103291
Kera	1.16428	0.0051955			Gria1	-2.70569	0.00103291
Slc4a11	1.1157	0.0051955			9230104L09Rik	-2.1739	0.00103291
Fbxo2	1.05304	0.0051955			1500035N22Rik	-3.97877	0.00103291
AK129341	-1.19468	0.0051955			Bbs1	-1.11275	0.00102822
Gc	-1.60792	0.0051955			Vwa3a	-2.26608	0.0010263
1810049H13Rik	-1.07668	0.00519376			Eif2c4	-1.44647	0.0010263
Htr7	2.98411	0.00517401			Hba-a1	-7.1445	0.0010263
Rtn4r	3.62393	0.0051668			Tctex1d4	-2.41687	0.00102395
Rnf19b	1.655	0.00516624			Diras2	-2.23056	0.00102283
Hck	1.31321	0.00516624			Taz	-1.16081	0.00101399
Zdhhc15	2.09798	0.00516573			Hhatl	-1.91547	0.00101278
Fmo1	-1.83375	0.00516573			Tmem107	-1.61935	0.00101278
Cox18	1.30496	0.00516208			Cbr2	-2.57256	0.00101278
Tubb2a-ps2	1.15083	0.00516145			Kcnj13	-3.19189	0.00101278
Foxred2	1.15511	0.00515848			Zan	-2.17236	0.00101278
Ephx4	-1.45802	0.00515848			Ngef	-1.57129	0.00101278
Myl2	1.16941	0.00513934			Mblac2	-1.37894	0.00101278
Mcee	-1.28716	0.00513934			Echdc3	-1.24412	0.00101278
Plekha6	-1.63893	0.0051259			Calml3	-3.79141	0.00101278
Psapl1	1.66115	0.00512519			Cadps2	-1.01209	0.00100929
Usp11	-1.05361	0.00512519			Adam22	-2.64281	0.0010032
A930007A09Rik	-1.07083	0.00512145			Chst3	-1.79662	0.0010032
Mmp9	2.14126	0.00512003			Wdr52	-2.58706	0.0010032
Fam154b	-1.73412	0.00512003			A530099J19Rik	-2.95527	0.0010032
AF067061	3.38104	0.0051031			1700009P17Rik	-2.3483	0.000997573
1700013H16Rik	-1.0897	0.0051031			Fam198a	-1.34914	0.000990385
Itpkc	1.34097	0.00509799			1700028P14Rik	-1.8651	0.000988282
Afp	1.73619	0.00506935			Cyhr1	-1.32856	0.000969727
Clca2	3.53364	0.0050683			Acvr2b	-1.61279	0.00096648
Skor1	1.39444	0.0050683			Cftr	-1.50325	0.000962253
Rhebl1	-1.27784	0.0050683			Fgf1	-1.88656	0.000962253
Ifltd1	-1.70037	0.0050683			Rbp4	-2.17495	0.000962253
Hist1h3g	1.83082	0.00506582			2610015P09Rik	-1.80694	0.000962253
Specc1l	-1.2898	0.00506582			0610011F06Rik	-1.36687	0.000962253
Enpp2	-1.69026	0.0050524			C130074G19Rik	-1.34228	0.000959797
Krt28	2.72685	0.0050523			Kcnmb4	-2.77899	0.000956786
Acss1	-2.39645	0.00504871			Dcxr	-1.60198	0.000953064
Apol6	3.83962	0.00504771			Akap14	-4.48403	0.000944108
Lphn1	-1.3607	0.00504476			Aspg	-1.47681	0.000943733
Orc1	2.05005	0.00502999			Kcnk12	-3.11178	0.000941537
Zfp36	1.24121	0.00502999			Slc4a5	-3.22931	0.000941537
Gm5608	1.43629	0.00502928			Klhl17	-1.33094	0.000941537
Catsperg1	-1.00425	0.00502928			Kif6	-2.11341	0.000941537
Zdhhc24	1.26103	0.00502664			Ms4a15	-4.28139	0.000934012
Sobp	-1.86258	0.00502664			Reep6	-1.78199	0.000934012
Csad	-1.77477	0.0050227			Prodh	-1.6097	0.000934012
Bicd1	1.43657	0.00501439			Fsd1l	-1.45194	0.000931457
Cd24a	-1.00701	0.00501439			Pla2g2d	-2.10275	0.000931457
Id4	-1.48528	0.00501439			Sntn	-3.36295	0.000931457
Dleu2	-1.48664	0.00500411			Ntn4	-1.30029	0.000931457
Scgb3a2	-5.89544	0.00500384			Spag17	-2.10912	0.000931457
Ddx26b	-1.05925	0.00499739			Gstt3	-1.64317	0.000931457
Elk3	-1.08582	0.00499183			Cd24a	-1.48583	0.000930102
Bphl	-1.43805	0.00499183			Tmem195	-1.26468	0.000924764
Chmp4b	1.82459	0.00497411			4932443L11Rik	-2.50066	0.000924597
Sbno2	1.49647	0.0049677			Lrrc48	-2.88588	0.00092367
Ddn	2.15767	0.00496713			Rap1gap	-1.33081	0.000923006
Rin1	2.35883	0.00493702			Mdh1b	-2.17752	0.000919141
Neurog3	1.7144	0.00493177			Sema3e	-1.24519	0.000917803
Gm98	1.24085	0.00491609			4732415M23Rik	-1.38693	0.000916208
Fzd10	-1.57399	0.0049108			Ehd4	-1.33814	0.000916208
D130062J21Rik	-1.89462	0.0049108			Gm1574	-3.88162	0.000916208
Gm12250	3.10922	0.00490255			Pamr1	-2.24044	0.000916208
Armcx1	-1.03849	0.00490255			Rab3c	-1.18261	0.000916208
Stk33	-1.83832	0.00490255			Msi2	-1.28754	0.000916208
Prickle1	-1.76371	0.00489758			Por	-1.3972	0.000912111
Adck3	-2.00606	0.00489758			Gsn	-1.6775	0.000912111
Ifna2	2.2277	0.00489418			Dhdh	-1.45687	0.000908936
Plau	1.45096	0.00489418			Glt8d2	-1.97245	0.000904939
Hmox1	1.44087	0.00489418			Tmprss2	-1.81442	0.000903646
Ttc30b	-1.25963	0.00489418			Gm1673	-1.11508	0.000898865
Cyp2j9	-1.35647	0.00489418			Tln2	-1.82149	0.000898429
Ldlrad1	-2.22837	0.00489418			Atp7b	-1.52822	0.000894757
F13a1	2.37064	0.00488337			Rasgef1a	-1.89855	0.000893117
Etv4	1.29089	0.00488337			A930007A09Rik	-1.76336	0.00088116
Selp	3.1708	0.00488142			D630004K10Rik	-1.64473	0.000879275
Ankrd22	2.26081	0.00488142			Gsta3	-1.41414	0.000878106
Cebpe	3.34092	0.00485297			Hey1	-2.8891	0.000867502
Rin3	1.34308	0.00485297			Cyp2c44	-3.03656	0.00086034
4933439F18Rik	-1.04596	0.00483536			Smarca2	-1.81265	0.00086034
Bmp8b	2.26786	0.00483441			Ccdc113	-2.72244	0.000857314
D830031N03Rik	-1.39302	0.00481801			1700009N14Rik	-1.98471	0.000857314
Nrxn1	-1.58444	0.00481069			Kcnk2	-2.49099	0.000857314
Abpe	-1.19909	0.00480288			Pnrc1	-1.11957	0.00085633
Hmga1	1.90554	0.00479609			AB041803	-1.79928	0.00085589
Bai1	2.70428	0.00479479			Plk1s1	-1.11324	0.00085589
Tnc	3.21674	0.00479009			Wasf3	-1.20785	0.000854149
Klk1b24	2.6334	0.0047804			AU021034	-2.60017	0.000853684
Gpr35	2.59954	0.0047804			Atp6v1c2	-2.85175	0.000842477
Sertad1	1.45348	0.00477702			Unc13b	-1.2018	0.000842477
LOC100503357	1.42735	0.00477702			Dnahc7b	-2.88219	0.000839331
1190007I07Rik	-1.01773	0.00476197			Cep70	-2.31589	0.000839331
Cd209a	-3.09048	0.00475864			Aasdh	-1.15058	0.000839331
Cdkn1a	2.52366	0.00475707			Rabl2	-1.39094	0.000839331
H2-M9	2.08035	0.00475707			Ephx1	-2.62637	0.000834627
BC030867	1.72195	0.00475707			Zfp704	-2.16817	0.000828577
Htr2a	1.70979	0.00475707			Kazald1	-1.34657	0.000811867
Frrs1	1.4234	0.00475707			Mtus1	-1.09371	0.000809359
Itgb6	1.3418	0.00475707			BC018465	-2.59621	0.000809359
Ccdc151	-1.37239	0.0047558			Igf1r	-1.18181	0.00080353
1810063B07Rik	-1.18287	0.0047553			Myh3	-1.49537	0.00080353
Gm12633	-1.20749	0.0047553			Tspan7	-1.52445	0.000800656
Six5	-1.4117	0.0047553			A330021E22Rik	-1.47152	0.000795397
Pabpc4l	-2.34859	0.00473734			Acbd4	-1.32923	0.000794639
Lair1	1.70752	0.00473607			Cbs	-3.04826	0.000793332
Fzd7	-1.33801	0.00473607			Dnahc9	-2.43309	0.000790582
Optc	-2.74129	0.00473188			D4Bwg0951e	-1.25314	0.000781923
Gm4316	3.41687	0.00473128			Kcne2	-1.41609	0.00078153
Gm3925	-1.11761	0.00472151			Ctnnd2	-1.20192	0.000771075
Rab3c	-1.00442	0.00471558			Cdh16	-3.54718	0.000765761
Dhdh	-1.34564	0.00471548			Ccdc150	-2.90773	0.000763457
Sgms2	2.45311	0.00471266			Mcc	-1.46032	0.000763457
Fcgr2b	2.19666	0.00471266			Gprasp1	-1.95672	0.000751539
Spats2l	1.92431	0.00471266			Lrrc36	-2.85672	0.000750931
Dpep3	2.55162	0.00470691			Carkd	-1.00238	0.000746053
Dpyd	-1.40368	0.00470691			Ccdc40	-1.9428	0.000744172
Ccdc33	-1.69381	0.00470691			Bnip3l	-1.02052	0.000737865
6330403K07Rik	-3.41656	0.00470691			1700027A23Rik	-1.48863	0.000737865
Cxcr2	2.86065	0.00469889			LOC100316870	-1.09153	0.000737865
Ccdc93	1.285	0.00469574			Cyp2s1	-2.08246	0.000737865
Gm10848	-1.29083	0.00469001			Ldlrad1	-2.90776	0.000737865
Traip	1.30823	0.00468298			Meig1	-3.24961	0.000737865
Sipa1	-1.00184	0.00468298			Armc4	-2.25663	0.000737865
BC147527	2.34749	0.00467238			LOC100505360	-1.18503	0.000737865
Nnmt	1.11329	0.00467238			Lypd2	-2.98833	0.000735275
2610015P09Rik	-1.08898	0.0046653			Ltbp4	-2.76043	0.000728085
1700029J07Rik	-1.53634	0.00466472			Tmem116	-1.83407	0.000725106
Gm6907	2.54982	0.00466149			Krt10	-1.23509	0.000724805
Dnahc8	-1.08798	0.00466086			Nrbp2	-1.37195	0.000723415
Ces1f	-5.55284	0.00465836			Acot5	-1.67585	0.00072246
Gjb1	-1.1702	0.00463129			Chchd10	-1.66277	0.00072246
Epor	-1.36497	0.00462448			Amy1	-1.69456	0.00072246
Ccdc121	-1.0501	0.00462233			Zrsr1	-1.51132	0.00072246
Trpc3	-1.87024	0.00461834			8430408G22Rik	-1.60201	0.00072246
Cyp2c44	-2.45089	0.00461834			Wdr13	-1.01588	0.000711301
Foxo3	1.37261	0.00461517			Sirt3	-1.23013	0.000711301
Lass6	1.18895	0.00461517			Tspan12	-1.92714	0.000711301
9830001H06Rik	-1.29624	0.00461517			Col8a2	-1.40879	0.000711301
Cdh3	2.71127	0.00461335			Lrguk	-2.13205	0.000705545
Wdr43	1.41936	0.00460707			Ccdc37	-2.91946	0.000705545
Tlk2	1.02932	0.0046053			Gkn3	-2.29666	0.000705545
Scg5	-1.03058	0.0046001			4930555I21Rik	-2.73466	0.000702275
Dock6	-1.22183	0.0046001			Dnahc3	-3.53495	0.000702275
Vgll4	-1.00734	0.00459792			Acss1	-2.91282	0.000697945
Arvcf	-1.62138	0.00459792			Gm5820	-1.78578	0.000696237
Fam193b	-1.21566	0.00459552			Endog	-1.42302	0.000695261
Scube1	-1.47989	0.00457992			Slc35d3	-2.88039	0.00069369
Lrrc25	3.17514	0.00457695			Ccdc81	-2.49572	0.000691587
Piwil4	1.85452	0.00457695			E230008N13Rik	-2.71023	0.000688916
Pcolce2	-3.68876	0.00457695			Zdhhc1	-1.855	0.000688916
Dixdc1	-2.38479	0.00457692			Ttll3	-1.67721	0.000688916
Adamts12	-1.2664	0.00456431			Slc24a3	-1.05675	0.000688916
C1rb	1.2288	0.00455038			Tdrd3	-1.02184	0.00068077
Cox6b2	-1.56291	0.00455038			Clec14a	-1.67019	0.000667164
Mak16	1.01716	0.00455033			Osbpl6	-1.67279	0.000661599
Chi3l4	2.04291	0.00454321			Kcnq1	-1.27175	0.000661599
Efcab10	-2.21159	0.00454321			Gstm4	-1.74704	0.000656701
Ifitm6	2.99543	0.00453656			D630039A03Rik	-2.38431	0.000653416
Agap1	-1.37046	0.00453178			Ttc28	-1.32605	0.000646619
Ly6a	2.2104	0.00452623			Pipox	-2.63627	0.000638432
Pvrl3	-1.23294	0.00452384			Gm2149	-3.33483	0.000634562
Ahr	-1.38136	0.00452384			Aldh3a1	-2.14252	0.000634562
Il13ra1	1.0961	0.00450812			Ak7	-3.03755	0.000625047
Pax5	-1.84481	0.00450654			Eno4	-2.29744	0.000597675
2310014L17Rik	4.70278	0.00449437			Ect2l	-4.03717	0.000594382
Ccl5	2.71391	0.00449437			Lrrc51	-2.43253	0.00058388
Aspa	-1.06441	0.00449437			Ptpru	-2.40722	0.000581999
Camk2n1	-1.23931	0.00449437			Ccdc129	-5.10526	0.000580394
BC031353	-1.51485	0.00449437			C85492	-1.21537	0.000576384
Gsg1l	-2.64255	0.00449437			Tppp	-2.21272	0.000567627
Nop14	1.0485	0.00449313			Fam161a	-2.95188	0.000564764
Spag6	-1.71005	0.00449313			Lrrc46	-1.99038	0.000564023
Ppp1r15b	1.17029	0.00449183			1700016K19Rik	-1.91096	0.000564023
Klhdc8b	-2.10266	0.00449183			Colq	-4.97002	0.000564023
Gcg	5.22192	0.00448035			St3gal6	-1.1709	0.000564023
Fank1	-1.22671	0.00448035			Ccdc65	-2.19127	0.000560926
Gpr65	1.94174	0.00447496			Mycbpap	-3.57713	0.000560926
Scarf2	-1.33479	0.00447367			Plekhg5	-1.41915	0.000560441
Syt1	3.08131	0.00446557			9130019O22Rik	-1.26561	0.000557558
Col17a1	-1.58334	0.00445107			Bphl	-1.83435	0.000557558
Pdzd9	1.37603	0.00445092			Vipr1	-1.59838	0.000557558
Stk38l	1.20729	0.00445075			Adcy9	-1.10528	0.000557558
Kdelr3	1.02177	0.00445075			1700008A04Rik	-2.6648	0.000557558
Camk2b	-1.59912	0.00445075			Xpc	-1.21416	0.000557558
Mthfd1l	1.343	0.00444897			Glb1l3	-1.78428	0.000546897
1700001P01Rik	1.99144	0.00444688			4833420G17Rik	-1.19054	0.000546733
Tekt5	1.29983	0.00444688			6330503K22Rik	-1.09039	0.000546733
Slc19a2	1.03309	0.00444688			Pdia2	-2.44986	0.000543937
Fmod	-1.83743	0.0044439			Pcp4l1	-3.00588	0.00054338
Cyp4f18	2.26572	0.00444265			Prr18	-2.12622	0.000539911
Slc23a3	1.83828	0.00444145			Nme5	-2.36529	0.000531834
Tmem173	1.28019	0.00444145			Kif21a	-1.20087	0.000529234
Tlx1	1.08763	0.00443745			Tnk1	-1.21965	0.000529234
4930404N11Rik	-1.35248	0.00441543			Ttc25	-3.44381	0.00052634
Sh3d19	-1.01949	0.00441028			Dcdc2a	-2.94389	0.000521921
Art4	-2.59599	0.00440948			Fam171a1	-1.14449	0.000521422
Lum	-1.0673	0.00439489			Nxph3	-1.75347	0.000520998
Prom2	-2.54344	0.00438417			BC060267	-2.00457	0.000518586
Lgals3	1.2508	0.00437329			Ubxn10	-1.93944	0.000518586
Pgm5	-1.31884	0.00437329			4930579G22Rik	-1.76088	0.000518586
Efcab4a	-1.48334	0.00436448			Lrrc23	-4.00963	0.000518586
Parp11	2.24896	0.00436231			LOC100504004	-1.05479	0.000518586
Camk2n2	1.0544	0.00436231			Spag6	-2.91809	0.000518586
Akap14	-2.23215	0.00434192			Lrrc43	-2.504	0.000518586
Agbl1	-2.40538	0.00433203			Ulk4	-1.66743	0.000518586
Gsdmc4	2.37724	0.00433095			Tmem87a	-1.1694	0.000518586
Fmo3	-4.08028	0.00433095			Gm5124	-1.99901	0.000518586
Fat3	-1.7067	0.00432917			Cyp4b1	-1.7583	0.000518586
C630016N16Rik	-1.78402	0.00432376			Camk2b	-1.28493	0.000518586
Uox	-2.16501	0.00432203			Dnaic1	-2.45274	0.000515991
Zcchc2	1.1397	0.00431706			Ppm1l	-1.36584	0.000515991
Apobec1	2.36422	0.00430908			Dynlrb2	-3.16915	0.000515991
Etv6	1.94981	0.0043084			Tmem110	-1.39459	0.000515991
Socs1	2.48375	0.00429785			Dnaic2	-1.9885	0.000515991
Upk3a	-4.1878	0.00429785			Ttc12	-1.36826	0.000515991
Zmynd19	1.12161	0.004293			Pard3	-1.13239	0.000515991
Zwilch	1.06274	0.00428761			Tekt2	-2.40723	0.00051367
Tctex1d4	-1.68584	0.00428644			BC051142	-2.24332	0.00051134
Nfkbie	1.61073	0.00427834			Kcnc2	-1.57588	0.000503962
Dpysl3	-1.29786	0.00427338			Ccdc17	-3.34752	0.000500148
Kcnma1	-1.65151	0.00426258			Zfp612	-1.79002	0.000489377
Tcstv3	3.29952	0.00426072			Macrod1	-1.37051	0.000486804
Oaf	1.26033	0.00426072			Cckar	-3.27204	0.000475704
Kng2	2.39764	0.00425116			Zdhhc22	-4.33233	0.000475704
Ccdc25	1.44673	0.00425116			Ccdc146	-3.44724	0.000473715
Defb25	-1.16149	0.00425116			Ttll6	-2.351	0.000471201
Myd88	1.51032	0.00424535			Gm5226	-6.21486	0.000471201
4930431P19Rik	-1.83827	0.0042415			Nhlrc2	-1.10891	0.000471201
LOC630322	-1.1792	0.00423544			Gstm1	-3.24778	0.000470112
Tecpr1	-1.20892	0.00423544			Acadm	-1.35328	0.000469156
Cyr61	1.09876	0.00423226			Ttc29	-3.62804	0.000469156
Ptpdc1	-1.09101	0.00423226			Cpm	-2.73846	0.000469156
9930111J21Rik2	3.79475	0.00422696			Esyt3	-1.9685	0.000432686
Klk1	2.73855	0.00422696			Rsph1	-2.45814	0.000431593
Egr2	2.20478	0.00422567			H2-M2	-2.54654	0.000431593
Marveld3	1.22786	0.00422567			Arhgef38	-3.11798	0.000431593
Pigz	-1.73764	0.00422523			Nap1l5	-3.68067	0.000431593
Wnt10b	-2.07961	0.00422523			1700026L06Rik	-2.09631	0.000431593
Nlrc5	2.76471	0.0042222			Cyb5	-1.21242	0.000431593
Tubb4	1.32851	0.0042222			Cdhr3	-3.50057	0.000431593
Avpr1a	-2.88105	0.0042222			Hmgcs2	-4.3767	0.000431593
Mapt	-1.61354	0.00420653			4930412C18Rik	-2.21737	0.00042808
Dgkb	-3.42759	0.00419703			Slc35f3	-2.12702	0.000421557
LOC100047044	-1.73671	0.00419556			Ccbl1	-1.68789	0.000417226
Acbd4	-1.12985	0.00418953			Dnaja4	-1.75082	0.000417226
Tlr3	2.13363	0.00418742			Fam92b	-4.43839	0.000408413
2610034B18Rik	1.15766	0.00418163			Armc2	-2.50138	0.000408413
Sva	1.59084	0.0041759			Plekhb1	-1.84182	0.000408413
Ptpn14	2.44884	0.00417081			Ttc16	-2.59851	0.000408413
Snap23	-1.25636	0.0041685			Tppp3	-2.98299	0.000408413
Kif5c	2.29619	0.00416215			4933439F18Rik	-1.34631	0.000407885
A3galt2	1.62614	0.00416215			1700013F07Rik	-2.22772	0.000407009
Rapgefl1	-1.46849	0.00416015			Rprm	-1.67932	0.000400946
Tbx1	-1.65634	0.00415793			Stard9	-1.65052	0.000397303
Tead3	1.41223	0.00414566			1700026D08Rik	-3.03457	0.000397303
Ryr3	-2.10284	0.00414566			Txndc6	-3.21394	0.000397303
Ccdc147	-1.17513	0.00412939			Tox3	-1.86944	0.000397303
Pml	1.51359	0.00412745			Ccdc33	-2.81449	0.000397303
Gm3142	3.54853	0.00412616			Hepacam2	-3.8976	0.000397303
Wnt7a	1.7063	0.00412616			Ccdc155	-2.47322	0.000397303
Fut4	1.11217	0.00412616			Aox3	-4.80772	0.000396636
Ninj2	2.67163	0.00411618			Dnahc11	-2.55359	0.000395216
Slc35f3	-1.64448	0.00410797			Ccdc153	-3.41066	0.00039232
Ubd	5.71924	0.00410748			Rsph4a	-2.14127	0.00039232
Traf3ip3	-1.15052	0.00410748			Aldh1a7	-2.16584	0.000391985
Ms4a8a	2.69185	0.00410677			Atp2b2	-2.28524	0.000391594
Birc3	1.17481	0.00410677			Camk2n1	-1.62843	0.000391594
Mpeg1	1.90336	0.00410157			Ccdc78	-2.98564	0.000391594
Pyy	1.09536	0.00409525			Trf	-1.51296	0.000391594
2310034G01Rik	-1.41878	0.00408482			Gm281	-2.09462	0.000391594
Gm7609	3.71933	0.00406157			C230072F16Rik	-2.71229	0.000391594
Phox2a	3.1833	0.00406157			Serpina3a	-3.73355	0.000391594
Ggct	1.16252	0.00406157			Wdr63	-2.35441	0.00037763
Nps	1.10536	0.00406157			Odf3b	-2.87029	0.00037763
Fam65b	-1.17426	0.00406157			Fam166b	-2.83575	0.000374825
Kcnu1	-2.47645	0.00406157			Fxyd2	-1.8949	0.000372245
Ptprd	-1.50352	0.00405468			Mns1	-1.85594	0.000372245
Ubqln1	1.02367	0.00405212			AK129341	-2.00288	0.000364386
Sdc2	-1.46119	0.00405212			Zmynd10	-2.82142	0.000364386
Mtmr9	1.05366	0.00404015			Ccdc108	-3.22439	0.000364386
Ankrd50	-1.05849	0.00404015			Ccdc164	-2.3361	0.000364386
Pla2g4c	3.2879	0.00402607			Dixdc1	-2.80996	0.000364386
Kcp	-1.41883	0.00402607			Tff2	-6.21466	0.000364386
Snai2	-1.84693	0.00402607			Appl2	-1.84053	0.000364355
Dapp1	1.86454	0.00401992			Fn3k	-3.04838	0.000362912
Inhba	2.81361	0.00400907			Gm2155	-2.4101	0.000362912
Uhrf1	1.87756	0.00400907			Pxmp2	-1.63153	0.000362912
Clcn5	1.91057	0.00399395			1700094D03Rik	-2.53601	0.000362023
Bak1	1.42636	0.00399395			T2	-4.92567	0.000362023
Ttc29	-2.29915	0.00399395			1700091H14Rik	-4.71192	0.00035878
Map3k9	1.13225	0.00397747			Stk33	-2.55541	0.00035878
Mfge8	-1.0709	0.00397747			Iqca	-4.62925	0.00035878
Fcrls	-1.25831	0.00397715			5330417C22Rik	-3.44446	0.000351514
Mrgpra2b	3.15822	0.00397373			Prkcz	-2.30039	0.000345075
Flrt3	1.02453	0.00396608			Kcnmb2	-3.17274	0.000342134
Spem1	2.03468	0.00395735			Ces1e	-4.46376	0.000342134
[truncated: 1,983 more rows]

## Sheet: GSE40091
3days					5days
ID	logFC	adj.P.Val			ID	logFC	adj.P.Val
Gp2	1.02342	0.0498081			Saa3	5.35688	3.7785e-06
Mylpf	1.02282	0.0471262			Irf7	4.78133	3.7785e-06
Acta1	1.1038	0.0440595			Cxcl11	5.58	3.7785e-06
Krt4	1.1721	0.0425484			Isg15	4.23995	4.07149e-06
Neurog1	-1.01868	0.0407508			Cxcl10	5.14494	6.20492e-06
Alox12e	1.55783	0.040315			Ccl2	4.56148	7.7637e-06
Stac3	1.13112	0.0378236			Ifnb1	3.86481	7.7637e-06
Col2a1	1.90222	0.0333484			2210407C18Rik	4.10728	7.7637e-06
Klhl31	1.10786	0.0328643			Ccl7	5.36023	7.7637e-06
Srrm3	1.22354	0.0325577			Ifit1	3.62127	7.7637e-06
9030607L20Rik	1.04605	0.0318525			Oas1a	3.55471	7.7637e-06
Cfhr1	-1.47348	0.0308534			Sectm1a	3.23781	8.12102e-06
1100001G20Rik	-1.23234	0.0302792			H28	3.85321	8.20905e-06
4930533I22Rik	-1.01753	0.0274763			Fcgr1	3.5341	8.5599e-06
Tnnc2	1.01959	0.0267315			Oas3	3.58271	8.5599e-06
Amn	1.11398	0.0243732			Trim30d	3.91384	8.87185e-06
Fitm1	1.22347	0.0240422			Zbp1	4.54741	8.98315e-06
Pitx1	1.01191	0.0237408			Igtp	3.00874	1.04151e-05
Tat	-1.01296	0.0236517			Oasl1	4.09982	1.08516e-05
E2f8	1.24027	0.0233886			Cxcl9	4.74681	1.15221e-05
Gpr113	-1.53358	0.0230013			Cd177	3.35089	1.24514e-05
Pgam2	1.04973	0.0227495			Usp18	3.23747	1.24514e-05
Obscn	1.35313	0.0217519			Fmo3	-2.82156	1.60639e-05
Agmat	-1.05172	0.0213157			Ms4a6d	2.67544	1.61863e-05
Ly6f	2.96949	0.0204215			Gbp6	3.51019	1.61863e-05
Tmem171	1.04745	0.0197616			Alb	-5.88886	1.61863e-05
Efcab10	-1.01244	0.0179492			Gzmb	2.89494	1.61863e-05
Cenpp	1.10105	0.017248			Socs1	2.64005	1.61863e-05
Abcc8	1.13431	0.0164704			Dhx58	2.80195	1.61863e-05
Casq1	1.09295	0.0164686			Ccr5	3.05704	1.61863e-05
Gm5483	1.07339	0.0161544			Apod	3.21884	1.68381e-05
Has2	1.26979	0.0159692			Pdcd1	2.62239	1.72705e-05
L3mbtl2	1.25332	0.015673			Ccl8	2.88162	1.82839e-05
Melk	1.34313	0.0150553			Nppb	2.68152	1.82839e-05
Saa4	-1.06276	0.0144389			Il18bp	2.88015	1.82839e-05
H2-Q1	-1.01615	0.0136999			Ccl12	3.9993	1.82839e-05
Oas1b	2.03574	0.0135968			Ifit3	3.03585	1.82839e-05
Got1l1	-1.01583	0.0135259			2810417H13Rik	2.61943	1.91956e-05
Ldb3	1.03649	0.0131698			Ifi44	3.80569	1.927e-05
Bglap-rs1	1.01181	0.0130711			Lcn2	3.03329	1.927e-05
2310043M15Rik	1.01868	0.01264			Tgtp1	2.56002	1.927e-05
Proz	-1.14177	0.0115968			Pon1	-2.34428	1.927e-05
Ckm	1.02121	0.0107401			Ccna1	2.81166	1.927e-05
Jsrp1	1.10112	0.0104228			Timp1	2.78196	1.927e-05
Hist1h2ai	1.36769	0.00978027			Ms4a7	2.72328	1.927e-05
Retnla	2.81733	0.00743695			Birc5	2.64562	1.927e-05
Mdm4	1.07857	0.00727589			Apol9b	3.16939	2.19199e-05
Rpl3l	1.2836	0.00715276			Cfb	2.88898	2.20847e-05
Cyp7a1	-1.26617	0.00710128			Oasl2	3.01046	2.27056e-05
Speer5-ps1	1.06161	0.00702708			Ido1	3.30118	2.27056e-05
Art1	1.19037	0.00670832			Retnla	3.0208	2.32822e-05
9130016M20Rik	-1.2272	0.00601971			Mx2	3.6411	2.32822e-05
Suv420h2	-2.34778	0.00585023			Sct	2.60985	2.34279e-05
Esco2	1.4005	0.00550144			Rtp4	2.32349	2.42e-05
Lect2	-1.46823	0.00506288			Ubd	3.3469	2.45333e-05
Krt79	-1.42032	0.00505565			Melk	2.22321	2.48405e-05
Fanci	1.60134	0.0049723			AI607873	3.0557	2.54978e-05
Eef1a2	1.46888	0.00496961			Ifi202b	3.24999	2.57083e-05
BC048679	1.89918	0.00482171			Xaf1	2.32772	2.59937e-05
Mbl1	-1.01674	0.00473952			Phf11	2.62429	2.78903e-05
Hk3	1.16721	0.00465143			Wfdc3	2.34621	2.78903e-05
Ryr1	1.64659	0.00454985			Rsad2	3.17359	2.78903e-05
Hist1h2ak	1.40921	0.00452289			Ifit2	2.6774	2.83195e-05
Ckmt2	1.43639	0.00435591			Cmpk2	2.2422	2.99187e-05
2310042D19Rik	1.21769	0.00433289			Pyhin1	2.41472	3.00473e-05
2610002D18Rik	1.10527	0.0040224			Gm14446	2.94975	3.00473e-05
Psapl1	1.06914	0.00372119			Spag5	2.14396	3.00569e-05
Mybpc2	1.2669	0.00363954			Cst8	-2.26396	3.00569e-05
Il4i1	1.00104	0.00294054			Retnlb	3.63445	3.00569e-05
Tnfaip2	1.06095	0.00282192			Irgm2	2.25453	3.00569e-05
Stfa2l1	1.29477	0.00263184			Krt15	2.09378	3.00569e-05
Lhx2	1.63745	0.00256112			Il6	2.70188	3.01065e-05
Tnnt3	1.22251	0.00249345			Lag3	2.19116	3.01065e-05
Slc22a30	-1.0237	0.00244395			Mcm10	2.47364	3.01065e-05
Mapk13	1.02049	0.00243305			Scgb1c1	-2.01444	3.01065e-05
Pglyrp1	1.12934	0.00237493			Mbl2	-3.34654	3.01065e-05
Mybpc1	1.59539	0.00221228			Ccna2	2.30071	3.01065e-05
Speer4b	1.3528	0.0021696			Top2a	2.40102	3.01065e-05
Rdh16	-1.04629	0.00214943			Rgs1	2.08633	3.01896e-05
Clec4d	1.03589	0.0020991			Ifi204	2.40166	3.01896e-05
Foxm1	1.13187	0.00200938			Gm12250	2.1797	3.02376e-05
Klrk1	1.19127	0.00192668			Irgm1	2.60369	3.02376e-05
Arc	1.17678	0.00190007			Alox12e	2.28297	3.02376e-05
Klk1b3	1.02157	0.00186765			Ccl4	3.38692	3.02376e-05
AW112010	1.10107	0.0018521			Il1rn	2.01215	3.02501e-05
Ugt2b1	-1.0718	0.0018521			Shcbp1	2.30948	3.03408e-05
Hist1h2ab	1.40649	0.00176595			D14Ertd668e	2.70343	3.11932e-05
Lmod3	1.12662	0.00175506			Reg3g	2.92101	3.13195e-05
Tnfrsf9	1.27606	0.0016876			Slfn4	2.59996	3.15431e-05
Il12b	1.0063	0.00161788			Fabp1	-2.20595	3.15431e-05
Slc22a1	-1.13725	0.00160245			Stat2	2.26595	3.15431e-05
Ttpa	-1.37036	0.00153173			Bst2	2.61055	3.37666e-05
Arid5a	1.06194	0.00152791			Cep55	2.07848	3.37666e-05
Rad54b	1.06605	0.00152321			Ska1	2.13711	3.37666e-05
Nusap1	1.08809	0.00150419			Mx1	3.01193	3.39969e-05
Pemt	-1.1364	0.00148053			Ms4a4d	2.23876	3.39969e-05
Cd69	1.05295	0.00146842			Mlkl	2.10846	3.39969e-05
Mmp14	1.02972	0.00146842			Iigp1	2.53135	3.4496e-05
AI848285	1.12042	0.00146842			Siglec1	2.77156	3.53345e-05
Hist1h2ao	1.35321	0.00145563			Epsti1	2.21311	3.55191e-05
Pdgfrl	1.07866	0.00145156			Ifi27l2a	2.11341	3.61437e-05
Nkx6-2	-1.18621	0.00138905			Aif1	2.35493	3.61437e-05
Cyp2d9	-1.4075	0.00134376			Apol9a	2.73001	3.65623e-05
Bbox1	-1.21459	0.00124819			Slfn9	1.88409	3.67776e-05
Amdhd1	-1.40845	0.00123853			Aurka	2.33586	3.67776e-05
Ect2	1.43675	0.00122742			Oas1f	3.47166	3.81078e-05
Darc	1.20723	0.00117727			Pkp1	2.03259	3.99155e-05
Acot12	-1.67528	0.0011753			Cd72	2.69724	4.12312e-05
Leap2	-2.56296	0.00116491			2210415F13Rik	2.15286	4.19367e-05
Agrp	-1.09552	0.00112778			C1qc	1.88899	4.19367e-05
Slamf7	1.25383	0.00111527			Cdca8	2.45462	4.19367e-05
Gm9758	1.03829	0.0010746			Irg1	3.2398	4.19367e-05
Tnfsf8	1.01064	0.00106757			Hist1h2ab	2.32085	4.19367e-05
Kif4	1.00255	0.0010521			Ifi205	1.94852	4.19367e-05
Itgb1bp3	1.65864	0.00104559			Cdca5	2.47994	4.19367e-05
Tspan1	1.00739	0.00104309			Orm2	2.00702	4.19367e-05
Hsd3b2	-1.57737	0.00102465			Tpx2	2.12573	4.19367e-05
Tmod4	1.42774	0.00099776			Fcgr2b	2.08784	4.1993e-05
Ugt2b5	-3.07481	0.000991829			Gm4955	2.94807	4.21988e-05
Ifitm1	1.04505	0.000982207			Col11a2	2.25003	4.21988e-05
Gpr84	1.2749	0.000982207			Ch25h	3.15275	4.23634e-05
Pdcd1	1.21369	0.000973277			Ces1f	-1.93584	4.23634e-05
Serpind1	-1.46093	0.000969577			Cdkn3	1.97353	4.23634e-05
Pydc4	1.06093	0.00095779			Cxcl13	2.6663	4.23634e-05
Gsta1	1.00913	0.000944759			Fcgr4	2.34514	4.23634e-05
Lbp	1.01548	0.000944759			Exo1	1.86951	4.23634e-05
Cxcr2	1.31839	0.000921131			Ifi47	1.92452	4.23695e-05
Ifna12	1.02283	0.000920849			Serpinb11	2.08943	4.39864e-05
H2-T24	1.24393	0.000916739			Ifng	3.01	4.40642e-05
Klk1	1.09123	0.000913407			Pbk	2.06286	4.47128e-05
Gldc	-1.08742	0.00089714			Clec4g	-2.01824	4.65717e-05
Cml1	-1.01992	0.00089714			Agr2	2.23274	4.65717e-05
Arsi	1.05251	0.00089714			Ccl19	2.24035	4.65717e-05
Cxcl5	3.8389	0.000896369			Sectm1b	2.47438	4.65717e-05
Krt85	1.09232	0.0008931			Saa2	2.28884	4.65717e-05
Slc2a6	1.1336	0.0008931			Cdc20	1.97545	4.67277e-05
Vnn1	1.58619	0.000889917			Ccno	1.92659	4.67277e-05
Speer4d	1.26687	0.000854777			Tap1	2.2033	4.73345e-05
Tekt2	-1.07894	0.000850317			Nuf2	1.83962	4.74768e-05
Gch1	1.44502	0.000831119			Rrm2	2.11525	4.84104e-05
Hao2	-1.81441	0.000795395			Ccnb1	2.41555	4.84104e-05
Abp1	1.20603	0.000795395			Rad51	2.0511	4.84104e-05
Agxt2l1	-1.28255	0.000795298			Nusap1	1.77327	4.84104e-05
Csf3	1.19252	0.00078378			Mki67	2.0408	4.85692e-05
Ugt2b37	-1.99538	0.00076143			Slc26a4	2.16693	4.92144e-05
Iglv1	-1.24705	0.000736131			Apol7a	1.69191	5.13493e-05
Ugt2b35	-1.77113	0.000735533			Fgb	-3.79486	5.17953e-05
Vsig1	1.66059	0.000729382			Tk1	2.11381	5.25138e-05
Nts	1.08874	0.000723352			Slfn2	1.92434	5.25138e-05
Scgb1a1	-1.04947	0.00071218			Agxt	-2.03409	5.25138e-05
Fabp2	-1.74717	0.000689235			Car13	1.70125	5.25138e-05
Gda	1.02595	0.000689235			Plk1	2.66954	5.25138e-05
Hmgcs2	-1.12315	0.000683409			Gbp5	3.03585	5.37325e-05
Lcat	-1.10988	0.000666345			Fam26f	2.96946	5.39696e-05
Acsm5	-1.13802	0.000662121			Ccne1	2.0786	5.39696e-05
Csf2	1.35789	0.000661717			Saa1	5.37633	5.41518e-05
Ugt3a1	-1.28666	0.000660936			Xcl1	1.77643	5.41518e-05
Cxcl3	1.70391	0.000633405			Batf2	2.36428	5.41518e-05
Pvalb	1.28664	0.000626984			Cd5l	2.71909	5.86961e-05
Sult1d1	-1.52065	0.000625479			Tor3a	1.72701	5.86961e-05
Hsd17b13	-1.11575	0.000625479			Atf3	1.71188	6.18324e-05
Egr1	1.13277	0.000618959			Fgg	-3.67238	6.24366e-05
Stfa2	1.08684	0.000615472			Gbp2	2.05624	6.24705e-05
Elovl2	-1.27496	0.000613896			A530032D15Rik	2.00346	6.25624e-05
Gla	1.05722	0.00060993			Hist1h2ak	2.20889	6.25624e-05
Cyp1a2	-1.31035	0.000603238			Kif23	1.75756	6.25624e-05
Atp2a1	2.21337	0.00058178			Tgfbi	1.71944	6.31362e-05
1700024G13Rik	-1.23016	0.000575143			Mxd3	1.69981	6.31793e-05
Cd177	2.7517	0.000573689			Uhrf1	2.33311	6.31793e-05
Bcl3	1.4005	0.000571378			Psapl1	2.17751	6.3497e-05
Cpn1	-1.00384	0.000571378			Aldob	-3.64379	6.3497e-05
Acsm1	1.00039	0.000571378			Apoa2	-3.60769	6.38344e-05
Fhit	-1.18197	0.000563401			Lair1	1.63056	6.38807e-05
Exo1	1.30757	0.000563401			Nts	1.79681	6.42069e-05
Gsta2	1.35834	0.000562323			Pla1a	1.82052	6.42069e-05
2010317E24Rik	1.22087	0.000561817			Asgr1	-2.41547	6.45821e-05
Myh1	1.75311	0.0005565			Ube2c	2.14369	6.59787e-05
Rgs16	1.24691	0.00054906			Cdca3	2.0891	6.59787e-05
Slc39a14	1.18345	0.000541662			Tacc3	1.72399	6.59787e-05
Cacna1s	1.2175	0.000528757			Thbs4	2.15673	6.59787e-05
Gm8995	1.08089	0.000527272			Ms4a6c	2.14446	6.61227e-05
Cks2	1.03461	0.000527272			Ly6i	1.60662	6.85479e-05
Cyp2g1	-1.09047	0.000523864			Kif22	2.20692	6.90682e-05
Bcl2l15	1.06267	0.000518724			Noxo1	2.06814	6.9502e-05
Serpina3c	-2.00546	0.000518724			Apol6	2.00552	6.9502e-05
Acsm3	-1.03122	0.000514301			Pigr	1.7549	7.06223e-05
Slamf8	1.01562	0.000500256			Muc4	2.31002	7.1133e-05
Slc6a12	-1.10656	0.000500256			1500035N22Rik	-1.70272	7.14253e-05
Parp10	1.16361	0.000494174			Pttg1	1.81441	7.32718e-05
Hnf1a	-1.19779	0.000490161			A430084P05Rik	1.58229	7.34542e-05
Psrc1	1.03716	0.000486002			C1qa	1.85942	7.34542e-05
Igfbp1	-1.29425	0.000485466			Cenpf	2.06314	7.34542e-05
Itln1	1.12316	0.000477131			Lgals3bp	2.51305	7.37459e-05
Vsig2	1.33059	0.000476466			Cdk1	2.08169	7.37459e-05
Ugt3a2	-1.43005	0.000459642			Herc6	2.38912	7.46133e-05
Hist1h1b	1.24779	0.000454615			Ly6d	1.88438	7.52726e-05
Reg3g	2.12382	0.000454615			Slfn10-ps	2.11158	7.64606e-05
Kifc1	1.12843	0.000448374			Spink5	1.86906	7.87316e-05
Cyp2a22	-1.22783	0.000439653			Mug1	-2.35626	7.94487e-05
Cdca5	1.7836	0.000432188			Trim30a	2.01993	8.02543e-05
Cyp2c38	-2.27523	0.000428304			C1qb	1.94799	8.0397e-05
Sgk2	-1.17964	0.000428304			Klk7	2.01336	8.0397e-05
Cd72	1.16674	0.000413494			Myl2	2.41186	8.07226e-05
Ncapg	1.42881	0.000412578			Ccnb2	1.97525	8.08309e-05
Slc15a3	1.11371	0.000411014			Crct1	1.82287	8.18009e-05
Ccnb1	1.69844	0.000402154			Gbp3	2.34438	8.18009e-05
Bub1b	1.08322	0.000395599			Itln1	1.68013	8.18009e-05
Aass	-1.22167	0.000394957			Vav1	1.52939	8.18009e-05
Cyp2d12	-1.7045	0.000392828			Bglap-rs1	1.70438	8.18009e-05
Acat2	-1.07002	0.000391847			Stat1	1.63148	8.18009e-05
Nlrp6	-1.03018	0.000391847			2210011C24Rik	-1.54354	8.25036e-05
Neb	1.47785	0.000390416			Kif20a	2.12784	8.25036e-05
Pml	1.11246	0.000389713			Lce1e	1.66407	8.25436e-05
Aldh8a1	-1.52558	0.000389713			Serpinb12	2.00719	8.29624e-05
Piwil4	1.49399	0.000386303			Hmmr	1.91968	8.41471e-05
Ankrd23	1.29775	0.000386303			Cxcl5	2.37602	8.48959e-05
Pou3f1	1.46746	0.00038533			Mug2	-1.60915	8.48959e-05
Asap3	1.11146	0.000383232			Slfn1	1.81	8.58526e-05
LOC639910	1.31629	0.000381567			Hist1h2ao	1.80532	8.60866e-05
B430306N03Rik	1.1341	0.000375182			Tmc5	1.68578	8.61388e-05
Il1r2	1.27385	0.000367802			D17H6S56E-5	2.09069	8.61528e-05
Hmmr	1.39834	0.000360036			2310043M15Rik	1.70892	8.73338e-05
Clec4f	-1.72065	0.000358606			Cyp2d26	-1.93268	8.79709e-05
Kcna6	-1.17058	0.000355492			Tnfrsf9	2.22397	8.83951e-05
Cpn2	-1.74168	0.000354155			Apoh	-3.27993	8.83951e-05
F13b	-2.26403	0.000353405			Cpxm1	1.5695	8.83951e-05
Inhba	1.03403	0.000350808			Dscc1	1.56228	8.83951e-05
Slc38a4	-1.12162	0.000342929			Ifi27l2b	1.49324	8.94568e-05
Pbld1	-1.20993	0.000342929			Apoc3	-1.84793	8.94568e-05
Zc3h12a	1.19859	0.000341148			Fam25c	1.51853	9.40378e-05
Cyp2d34	-2.0825	0.000337555			2310042E22Rik	1.84925	9.40378e-05
Abat	-1.08376	0.000335146			Ncapg	2.36404	9.41658e-05
Lrrc4	1.25222	0.000333443			Bcat1	1.85289	9.41658e-05
Steap1	1.04307	0.000329091			Serpinb5	1.91116	9.41658e-05
Kif22	1.38292	0.000329091			Chit1	2.90919	9.41658e-05
Pigr	1.55604	0.000328522			Krtdap	1.87328	9.52063e-05
Fam83e	1.38816	0.000327837			Lypd3	2.09783	9.57597e-05
Mcm6	1.07679	0.000325978			Ppa1	1.63315	9.88894e-05
BC006779	1.46284	0.000325157			Sprr1a	2.03642	9.88894e-05
Igfbp2	-1.20821	0.000325157			Tcstv3	2.38031	9.98199e-05
Lgals9	1.56935	0.000325157			Isg20	1.62202	9.98199e-05
Syt12	1.04593	0.000325157			Fignl1	1.76314	0.000100594
A430084P05Rik	1.20355	0.000325115			Lce1f	1.5914	0.000101509
Gabrp	1.10697	0.000317821			Vnn1	1.64405	0.000102058
5730455O13Rik	-1.10837	0.000315826			Ddx60	2.44947	0.000102349
Sgol1	1.41636	0.000304797			Asf1b	1.8416	0.000102495
Fignl1	1.2571	0.000304797			Plac8	1.58958	0.000102783
1700012B09Rik	-1.31038	0.000304797			Kifc5b	1.6147	0.000102783
Masp2	-1.09676	0.000302806			Nrn1	-1.93456	0.000102783
Niacr1	1.29929	0.000298398			Gbp1	2.45955	0.000105245
Ppa1	1.2707	0.000294301			Cd274	2.10849	0.000108708
Col1a2	1.03912	0.000294301			Msr1	2.56184	0.000110811
Fcer1g	1.00561	0.000289096			Trnp1	-1.37611	0.000112439
Dio2	1.5688	0.00028579			Cks2	1.59784	0.000112623
Hepacam2	-1.0411	0.00028579			Cngb3	1.72942	0.000112623
Adh4	-2.15478	0.00028579			Vnn3	1.87615	0.000112638
Morc1	1.11777	0.000284588			Trip13	1.56311	0.000114103
Cd14	1.49753	0.000281887			Kif2c	1.66455	0.000114103
4930451C15Rik	-1.11352	0.000280528			Il10	1.64666	0.000116665
Thbs1	1.1814	0.000279418			Tspan2	-1.38092	0.000120761
Slc2a2	-2.23276	0.000277172			Il4i1	1.66922	0.000120761
Xcl1	1.41044	0.000276934			Esm1	-1.57495	0.000120761
Tnip3	1.02192	0.000276873			H2-Q8	1.70359	0.000120761
Cd207	-1.0309	0.00027685			Oas2	3.16677	0.000120761
1500035N22Rik	-1.88831	0.000273998			Ddx58	1.79445	0.000120761
Clps	1.46413	0.000271433			Krt14	1.78747	0.000120761
Sult2a4	-1.01701	0.000270539			Serpinc1	-3.32753	0.000120761
Mup1	-2.38138	0.000270539			Aurkb	1.70804	0.000120761
Tcirg1	1.08075	0.000270539			I830012O16Rik	2.85963	0.000120761
Tgfbi	1.00696	0.000270539			Psmb8	1.39694	0.000124138
Il1b	1.69766	0.000270539			Hsh2d	1.47052	0.00012533
Ankrd2	1.34318	0.000269651			Areg	1.84215	0.000126293
Myot	1.20852	0.000266212			Spc24	1.86876	0.000126293
Fos	1.06568	0.000266108			Parp9	1.73272	0.000126293
Clec4e	1.35814	0.000266108			1700012B09Rik	-1.35196	0.000126293
Scd1	-1.04135	0.000263499			2310033E01Rik	1.48103	0.000126794
Aadat	-1.72032	0.000261479			Lpxn	1.40706	0.000126794
Sucnr1	-1.21444	0.000261479			Sgol1	2.20846	0.000128744
Il1f9	1.02832	0.000257801			2300002M23Rik	2.10629	0.000128986
Slc46a2	1.03443	0.000257801			2010317E24Rik	1.61038	0.000129351
Asgr2	-1.43029	0.000256789			Bub1b	1.66548	0.000129351
Tap2	1.01669	0.000256715			Tlr1	1.64619	0.000131816
Ccl20	2.59773	0.000253184			Krt79	-1.46209	0.000131818
Fam46a	1.01927	0.000253175			Gria1	-1.58601	0.000132811
Btbd17	1.92413	0.000248273			4833423E24Rik	1.63797	0.000133476
Elf3	1.11089	0.000242396			9930023K05Rik	1.69491	0.000133476
2210415F13Rik	2.1938	0.000242396			Tnfrsf4	1.87105	0.000134566
Ccna1	1.03228	0.000242162			Vstm2a	-1.46852	0.000135476
Pbk	1.52862	0.000236825			Psat1	1.35295	0.000136715
Ms4a7	1.47045	0.000231075			Gjb2	1.36433	0.000137316
Trafd1	1.30096	0.000229561			Neil3	1.40882	0.000138295
Ttr	-1.79539	0.000227182			Akap5	-1.31846	0.000138838
Slc6a13	-1.71803	0.000225844			Dtl	1.6677	0.000138942
Car13	1.31588	0.000222729			Slamf9	1.92518	0.00013919
Top2a	1.52329	0.000214708			Cd207	-1.30226	0.000140435
Casp4	1.04485	0.000214708			Irf9	1.42785	0.000141276
Tnni1	1.78819	0.000203368			Lgmn	1.46152	0.000141492
Nuf2	1.15545	0.000201736			Gpr65	1.40955	0.000143463
Asf1b	1.08106	0.000201242			Mnda	1.72075	0.000148276
Slfn3	2.13925	0.000197294			Brca1	1.66498	0.000148276
Ska1	1.20036	0.000196362			Gbp7	1.71012	0.000148276
LOC100505358	-1.39422	0.000192527			Cyp3a41a	-3.09789	0.000148797
Sds	-1.36788	0.000192203			Krt5	1.79679	0.000150802
Slco4a1	1.04007	0.000190815			Lemd1	1.57426	0.00015271
Cbs	-1.18559	0.000184716			Ces1e	-1.29695	0.00015271
Muc16	-1.16941	0.000184626			F2	-2.26439	0.000154039
Ppp1r14d	2.19355	0.000184626			Dck	1.36269	0.000154039
O3far1	1.15657	0.000184626			Nags	1.64917	0.000154598
Ifng	1.46648	0.00018024			Akr1b7	-1.37224	0.000154598
Trex1	1.85685	0.000178772			Ms4a6b	1.70331	0.00015644
Hap1	1.2163	0.000178126			Hpse	1.39515	0.000158544
Ccdc67	1.00179	0.000177182			Mov10	1.26986	0.000158778
Mup4	-2.51997	0.000176736			Prc1	1.94269	0.000161866
Pdzk1	-1.05217	0.000173962			Mcm6	1.59409	0.000162799
Cd300lf	1.29157	0.000173504			Ifitm1	1.49213	0.00016337
Gpr83	1.13034	0.00017346			Slc28a2	1.32105	0.000164181
Hpse	1.17707	0.000173043			Akr1c6	-3.33473	0.000165292
Stk39	1.02179	0.000173043			Gm16491	-1.42813	0.000167317
Apoc1	-1.67981	0.000172983			Bex2	-1.41513	0.000167454
Mt2	1.35126	0.000170343			Tgm1	1.40652	0.000169682
Cdc20	1.31055	0.000169732			Pycard	1.38478	0.000174263
Scgb1c1	-1.73332	0.000158822			Mcm5	1.64196	0.000175205
Gpx2	1.23603	0.000158508			Ercc6l	1.41555	0.000175205
Mcm5	1.07581	0.000154135			Cd86	1.45626	0.000175205
Trim34a	1.00156	0.000153425			Parp12	1.3409	0.000176872
Znfx1	1.45184	0.00014961			Pglyrp1	1.51561	0.000179795
Mettl7b	-1.76564	0.000148562			Tmem173	1.50093	0.000180266
Pnp	1.09985	0.000144071			Rnf213	1.8756	0.000182824
Tk1	1.39613	0.000141338			Esco2	1.62532	0.000182824
Slc25a47	-1.94716	0.000141338			Lce1i	1.55107	0.000185233
Kifc5b	1.0637	0.000140142			AI848285	1.44482	0.000187889
Col3a1	1.70474	0.000139727			Elovl4	1.4213	0.000189726
Gpr171	1.06467	0.000136881			Hells	1.47008	0.000189726
Cngb3	1.22793	0.000136881			Trex1	1.8308	0.000189726
Rrm2	1.18207	0.000136881			Hist1h2ai	2.21671	0.000192956
Vnn3	1.31464	0.000135322			Bglap	1.62188	0.000193811
Lag3	1.35858	0.000135205			Slc37a2	1.27704	0.000193811
Gm12250	1.69523	0.000133584			Hist1h1b	2.95567	0.000195212
Baat	-2.92258	0.000133584			Ect2	1.78217	0.000195811
Cenph	1.08445	0.000130281			Apoa1	-2.09892	0.000198143
Nt5c3	1.18455	0.000129709			Spats2l	1.76874	0.000202908
Fbp1	-2.00174	0.000128605			Fam64a	1.44694	0.000202908
Cyp2e1	-1.88855	0.000127183			Cxcl17	1.65931	0.000202967
Adamts4	1.65254	0.000124462			Lce1d	1.51716	0.00020381
Aurkb	1.17921	0.000124395			C3ar1	1.6485	0.000206427
Syt8	1.20372	0.0001238			Baiap2l1	-1.27962	0.000206427
Hao1	-2.81799	0.0001238			2310002J15Rik	1.58356	0.000206427
Acat3	-1.25607	0.0001238			BC013712	1.59669	0.00020852
Ifitm7	1.24636	0.0001238			Cp	1.30285	0.00020852
Ifi203	1.11374	0.0001238			Cnfn	1.65609	0.000209236
Ccl11	1.6831	0.0001238			Fanci	1.68918	0.000213326
F11	-1.32594	0.0001238			Il2rb	1.37669	0.000214742
Slc26a4	2.20058	0.000122905			Tmem171	1.34543	0.000218798
Mat1a	-1.49733	0.000122905			Kntc1	1.34952	0.000218798
Nek2	1.0075	0.000121526			Irf1	1.21926	0.000220723
A530032D15Rik	1.2926	0.000121526			E130306D19Rik	1.19952	0.000220723
Serpina1c	-1.70885	0.000121526			9230104L09Rik	-1.37963	0.000220723
Apom	-1.31027	0.000121358			Cyp4f15	-1.36128	0.000220723
Lcn2	2.73943	0.000120833			Kifc1	1.68781	0.000220723
Sp110	1.01388	0.000120179			Serpina6	-2.16328	0.000220723
Trim21	1.04309	0.000119231			Cenpe	2.26601	0.000227972
Mov10	1.25487	0.0001128			Gatm	1.47394	0.00022801
Ifitm6	1.15593	0.000106267			Cd14	1.36168	0.000228413
Unc79	-1.26791	0.00010374			Cd40	1.335	0.000229513
Tmc5	1.78936	0.000103235			1700018F24Rik	1.63556	0.000229764
Myh2	2.30734	0.000102986			Parp11	1.46975	0.000231161
Gbp7	1.5367	0.000101078			Mybpc3	1.97629	0.000231314
Ctps	1.03106	0.000101078			Kcnip4	-1.76287	0.000233387
Uba7	1.1936	0.000101078			Adprhl1	1.22862	0.00023372
Prodh2	-1.84506	9.83616e-05			Mthfd2	1.66253	0.00023372
Thrsp	-1.34854	9.81296e-05			2610002D18Rik	1.89897	0.00023372
Akr1c19	-1.19521	9.68594e-05			Ccl3	2.19923	0.000235505
Slc28a2	1.04742	9.67997e-05			Lrr1	1.67308	0.000237995
Myd88	1.0474	9.4193e-05			Col3a1	1.78013	0.000237995
Noxo1	1.86438	9.39189e-05			Cdh16	-1.37317	0.000237995
Tmem173	1.10217	9.39189e-05			Azgp1	-1.42825	0.0002381
Otc	-2.96568	9.32506e-05			C330005M16Rik	1.16393	0.000238645
Tnnt1	1.70144	9.14943e-05			E2f7	1.55766	0.000238889
Timd2	-1.0034	9.08096e-05			Slc38a4	-1.17852	0.000240047
Tap1	1.54583	9.07092e-05			Ifih1	1.51056	0.000241506
Ampd1	1.00691	8.98104e-05			Trafd1	1.41318	0.000241506
Galntl2	-1.01485	8.97113e-05			Clec4a3	1.33191	0.000241911
Thbs4	1.28666	8.78305e-05			Asprv1	2.11886	0.000245475
Sgol2	1.34581	8.76716e-05			Acer1	1.25593	0.000245686
Mitd1	1.41172	8.73687e-05			C330027C09Rik	1.30532	0.000249107
Steap4	1.25623	8.66875e-05			Pitx1	1.69759	0.000252185
Cep55	1.48461	8.60503e-05			Ly6e	1.77536	0.000252949
Fzd9	1.65261	8.53892e-05			Bak1	1.29858	0.000257609
Trem1	1.82356	8.30493e-05			Apobec1	2.1221	0.000257924
Col1a1	1.60634	8.30493e-05			Gpr171	1.50857	0.000258049
Apobec1	1.31035	8.29669e-05			Nek2	1.5934	0.000258049
C8g	-2.11603	8.29669e-05			Tnf	1.26578	0.000258938
Ugt2a3	-2.57667	8.18489e-05			Il1f8	1.82728	0.000258938
Ido1	1.47686	8.17402e-05			Rfc5	1.22387	0.000258938
Slc26a1	-1.39294	8.17402e-05			Daxx	1.3266	0.000260776
Ces1g	1.57999	8.08444e-05			Cfp	1.34453	0.000260776
Glyat	-1.43338	7.78605e-05			Sh2d1a	1.28132	0.000261567
Mki67	1.13661	7.48857e-05			Oit1	1.57017	0.000261808
Shcbp1	1.35472	7.46511e-05			Parp10	1.2806	0.000263727
Vgll2	1.58206	7.28552e-05			Lce1h	1.48942	0.000266484
Ceacam1	1.14703	7.11164e-05			Chl1	1.87212	0.000267025
Aurka	1.72336	7.11117e-05			Spc25	1.62749	0.000271158
Daxx	1.55387	7.11117e-05			Psmb9	1.22412	0.000271158
Kif23	1.53836	7.085e-05			Il1r2	1.68832	0.00027339
Tmem106a	1.02571	6.76427e-05			Ciita	1.22348	0.00027339
Rgs1	1.67437	6.5685e-05			Eif2ak2	1.61604	0.00027339
Tnf	1.65727	6.45178e-05			Lrrc25	1.6948	0.00027339
Creb3l3	-2.15374	6.1395e-05			S100a14	1.23891	0.00027339
Uroc1	-2.01578	6.1395e-05			Ifitm3	1.25115	0.00027339
Ly6c2	1.1788	6.08965e-05			Btbd17	1.53481	0.00027339
Batf2	1.7177	6.06284e-05			Aass	-1.3072	0.00027339
Ddx58	2.0262	5.93402e-05			Ccdc67	1.39331	0.00027339
Rad51	1.50056	5.77413e-05			Zc3hav1	1.16798	0.00027357
Mug1	-5.06462	5.77413e-05			Col1a1	1.38894	0.000278001
Hpx	-2.65928	5.70335e-05			Sult2a6	-2.6078	0.000278065
Spc24	1.27562	5.69992e-05			Tmem54	1.20032	0.000287536
Gdap10	1.16853	5.51326e-05			Aqp3	1.46914	0.000291493
Lilrb4	1.29008	5.19283e-05			Il21r	1.44509	0.000291942
Agr2	1.92629	5.19283e-05			Socs3	1.60205	0.000291956
Aif1	1.53556	5.19283e-05			Upk2	-1.26395	0.00029436
Plekha4	1.126	5.17101e-05			Spic	1.34126	0.00029436
Prss22	2.23412	5.14353e-05			Serpinb2	1.49299	0.000295355
Mthfd2	1.36286	5.07377e-05			Rab3il1	1.2542	0.00029977
Samd9l	1.27385	5.05575e-05			Cd8a	1.30718	0.000303532
Trnp1	-1.1135	4.95408e-05			Abca12	1.30966	0.000305379
E330016A19Rik	1.13661	4.94514e-05			Dusp2	1.24771	0.000305558
Sp100	1.14472	4.94514e-05			Cyp2a4	-1.46009	0.000305736
0610005C13Rik	-1.95801	4.94514e-05			Pstpip1	1.27138	0.000307611
Bcat1	1.1931	4.9311e-05			Gbp8	1.96466	0.000307611
Cfb	1.92785	4.90371e-05			Cks1b	1.29333	0.000307611
Slc27a2	-1.86722	4.90075e-05			Defb14	1.679	0.000307979
9130017N09Rik	1.76454	4.90075e-05			Lck	1.19582	0.000308048
2410066E13Rik	-1.05197	4.86267e-05			Galntl2	-1.32159	0.000309657
Marcksl1	1.34657	4.8163e-05			Vcan	1.17972	0.000309657
Cyp2a5	-1.14894	4.81623e-05			Cwh43	1.17701	0.000314115
Slfn8	1.35018	4.79214e-05			Ms4a4c	2.49947	0.00031455
I830012O16Rik	3.48231	4.72556e-05			Iqgap3	1.63806	0.00031455
Adam8	1.38487	4.69058e-05			Gc	-2.0846	0.000316709
Mosc1	-3.40066	4.62503e-05			Slamf8	1.74925	0.000316709
Wfdc3	2.50211	4.56458e-05			Egln3	1.41065	0.00031677
Tnfaip6	1.59467	4.56369e-05			Lilrb3	1.21603	0.000317495
C8a	-2.77795	4.53972e-05			Apitd1	1.16024	0.00032223
Fcgr4	1.32227	4.50038e-05			Chek1	1.22088	0.000331948
Tdo2	-1.51629	4.50038e-05			Slc2a6	1.32412	0.000332674
Ms4a6b	1.25788	4.32467e-05			Unc79	-1.82602	0.00033298
Cenpf	1.40254	4.29312e-05			Racgap1	1.39474	0.00033614
Gramd3	1.06599	4.28667e-05			4930449I24Rik	1.38401	0.00033614
Cyp1b1	1.26752	4.25958e-05			Znfx1	1.42206	0.000336332
Etnk2	-1.76471	4.25958e-05			Cd5	1.19691	0.000339758
Slfn2	1.52349	4.23325e-05			Tcstv1	2.14048	0.000340397
Serpina3n	1.63424	4.20044e-05			Ly86	1.43077	0.000340652
Cdkn3	1.63443	4.19581e-05			Ppp1r14d	1.70197	0.000342264
Cp	1.37754	4.14995e-05			Slc11a1	1.08455	0.000342264
Nrn1	-1.53623	4.14995e-05			Gch1	1.27219	0.000345628
Bst2	2.26171	4.14995e-05			Pcolce2	-1.38152	0.000346124
Wdr19	1.15463	4.14995e-05			Depdc1b	1.43873	0.000347792
Tcstv1	1.68535	4.01402e-05			Pou3f1	1.2818	0.000347792
Ube2l6	1.24065	3.97404e-05			Parp14	1.40265	0.000349316
Slc13a4	-1.1585	3.95177e-05			Ckap2l	1.22017	0.000349316
Tbata	-1.19857	3.95177e-05			Cenpw	1.46821	0.000349366
Tacc3	1.08933	3.90042e-05			Ikbke	1.19621	0.00034976
Cdca3	1.65626	3.90042e-05			Abca5	-1.1788	0.000352621
Slc38a3	-1.56328	3.86274e-05			Gstm3	-1.32391	0.000353232
Ckap2	1.20164	3.82602e-05			Siglec5	-1.14022	0.00036286
Cyp3a11	-2.29115	3.73308e-05			Lat	1.35534	0.000365713
Zc3hav1	1.19669	3.6977e-05			Clu	1.0995	0.000366621
Cd86	1.18781	3.66136e-05			Ly6a	1.3537	0.000369704
Ccl19	1.76145	3.64283e-05			Unc93a	1.34621	0.000373283
Ccne1	1.34578	3.62852e-05			H2afx	1.16063	0.000373283
Ifi205	1.90194	3.6276e-05			Tcirg1	1.17337	0.000373764
Apoc3	-4.49068	3.57747e-05			Cenpm	1.28967	0.000374046
Dtl	1.35817	3.56488e-05			Lipm	1.38966	0.000374046
Cyp4f14	-2.02871	3.55991e-05			E330016A19Rik	1.17393	0.000374046
Cyp26b1	-1.87463	3.55774e-05			Ggt5	1.46917	0.000374046
Agt	-2.14816	3.49912e-05			Gbp9	1.41141	0.000374046
Mab21l3	1.54113	3.49755e-05			Kazald1	-1.07848	0.000374046
9930023K05Rik	2.13024	3.47576e-05			Batf3	1.22286	0.000374046
Cyp2a4	-1.29127	3.47576e-05			Fhl2	1.50988	0.000374046
Mcm10	1.73422	3.47576e-05			Mitd1	1.17299	0.000375748
2210011C24Rik	-1.12332	3.43348e-05			Mybl2	1.29607	0.000378623
Socs3	1.48685	3.40267e-05			Trim29	1.09164	0.000383138
Prc1	1.33775	3.35281e-05			Pdgfrl	1.24355	0.000383491
Upb1	-1.81626	3.29441e-05			Il1f6	1.99062	0.000383703
Ifitm3	1.4714	3.21583e-05			Kif4	1.34747	0.000391425
Iqgap3	1.66863	3.16113e-05			Upk3a	1.48169	0.000394685
Ifi27l2a	1.93838	3.1448e-05			Asap3	1.08947	0.000396299
Uhrf1	1.61819	3.10138e-05			Mcm3	1.06681	0.000396344
Ube2c	1.60074	2.97975e-05			Afm	-2.47909	0.000396344
Atf3	1.62311	2.97887e-05			Wars	1.30493	0.000396344
Ccno	2.30784	2.95668e-05			Bpifa1	-1.43505	0.000396344
Ccnb2	1.56949	2.9241e-05			Igfbp3	-1.67694	0.000407334
Bpifa1	-1.24195	2.91673e-05			Cbx7	-1.13737	0.000407334
Spp2	-2.9485	2.87804e-05			Myd88	1.02222	0.000410895
Proc	-2.49472	2.80693e-05			Capns2	1.65332	0.000410895
Stat1	1.32486	2.8059e-05			Mefv	1.76014	0.00041336
Gbp9	1.245	2.78242e-05			Rptn	2.20423	0.000413816
Spag5	1.42956	2.74122e-05			Defa-rs2	1.27207	0.000413816
Slfn1	1.81045	2.68748e-05			Prf1	1.21016	0.000415768
Adar	1.34542	2.65332e-05			Ms4a4b	1.16985	0.000417868
Cyp3a25	-3.75708	2.65332e-05			Samsn1	1.05494	0.000417868
Pipox	-2.28659	2.65332e-05			Cd6	1.20086	0.000419291
Cxcl2	1.58923	2.65332e-05			Cyp2c65	1.19628	0.000421634
Parp9	1.6919	2.52635e-05			Rab6b	-1.19279	0.000421634
Chl1	1.20974	2.52635e-05			Gins1	1.17605	0.000421634
BC013712	1.27992	2.51797e-05			Kif11	1.13084	0.000424589
Cst8	-1.45825	2.51473e-05			Sp110	1.04566	0.000432406
Gm8579	1.69882	2.48796e-05			Myl3	1.17521	0.000432406
Rnf213	2.14797	2.40928e-05			Lat2	1.25397	0.000435173
Dpys	-2.10866	2.34383e-05			Sp100	1.06941	0.000435285
Trfr2	-2.43321	2.16963e-05			Bcl2l15	1.15019	0.000438656
Parp12	1.62671	2.16221e-05			Bpifa5	1.50385	0.000439342
Ceacam2	1.41785	2.16221e-05			Ncapd2	1.23344	0.000449263
Tm4sf4	-1.85158	2.16221e-05			Tyms	1.10611	0.000452582
Dck	1.29073	2.16221e-05			Ckap2	1.39694	0.000452582
Parp11	1.35677	2.16221e-05			Trp63	1.25222	0.000453287
C4bp	-4.37015	2.16221e-05			Tomm20l	1.04106	0.000464532
Hgd	-1.53046	2.09462e-05			Mup3	-2.18338	0.000464532
Ms4a6c	1.75161	2.03047e-05			Mafb	1.29641	0.000465962
Hsh2d	1.6988	2.00739e-05			Hc	-1.10721	0.000468394
Clu	1.21226	2.00739e-05			Il1f9	1.06305	0.000468394
Cxcl17	2.14642	2.00255e-05			4930547N16Rik	1.21694	0.000468394
Cdk1	1.65309	1.9759e-05			Piwil4	1.25546	0.00046965
Ubd	2.12916	1.92328e-05			Serpinb3c	2.15192	0.00046965
Cyp3a16	-3.72408	1.86306e-05			LOC639910	1.50124	0.00046965
Parp14	1.67714	1.77145e-05			Otop2	1.01386	0.000471112
Cyp2c70	-4.05136	1.76857e-05			Mab21l3	1.43467	0.000471644
Gzmb	1.77371	1.64034e-05			Gnmt	-1.4522	0.00047396
Spats2l	1.92937	1.59967e-05			Il1f5	1.70852	0.00047471
Apcs	-1.96216	1.54612e-05			A430093F15Rik	1.28974	0.000475243
Rgn	-3.57526	1.54612e-05			Cxcl16	1.15945	0.000480002
Isg20	2.09584	1.53617e-05			Fbxo5	1.32769	0.000480002
Ugt2b38	-2.66151	1.53617e-05			Dmgdh	-1.12997	0.000480002
Irf9	1.35896	1.45868e-05			8430408G22Rik	-1.03831	0.000480544
Kif20a	1.77103	1.431e-05			Gm12185	1.51779	0.000482205
Itih3	-2.79135	1.42117e-05			3300002A11Rik	-1.16437	0.000482205
Gsto1	1.6819	1.38457e-05			Samhd1	1.13826	0.000482205
Msr1	1.76596	1.38457e-05			Gins2	1.36113	0.000482205
Vtn	-1.71413	1.35378e-05			Aox3	-1.5295	0.000482205
Irgm2	1.64285	1.34806e-05			Angpt2	-1.04519	0.000482205
Bhmt	-3.09315	1.34214e-05			B430319G15Rik	-1.23735	0.000482466
Cyp2a12	-2.7892	1.28798e-05			Ceacam19	1.39792	0.000483233
Serpina1b	-2.03688	1.28647e-05			Rnf144a	-1.19006	0.000485118
Col11a2	2.24124	1.28647e-05			Evi2a	1.08456	0.000487251
Slc7a11	1.63037	1.28647e-05			Grp	-1.03367	0.000490834
Ugt2b36	-3.64064	1.25305e-05			Slc7a5	1.24873	0.000492849
Tcstv3	1.95508	1.25305e-05			Brip1	1.36074	0.000497143
Angptl3	-3.17707	1.2134e-05			Prss22	2.00401	0.000497143
Ms4a4c	2.1555	1.2134e-05			Glt25d2	-1.02627	0.000498418
F12	-2.51117	1.21314e-05			Pask	1.38273	0.000501009
Ces1f	-2.1031	1.19958e-05			2410066E13Rik	-1.3409	0.000501154
Cyp4a14	-4.7731	1.1406e-05			Ambp	-2.36446	0.00050161
Cxcl13	2.17782	1.1406e-05			Lce1a2	1.5962	0.000513636
Hrg	-2.37807	1.11003e-05			Lce1c	1.66883	0.000518104
Abcb11	-3.11668	1.08163e-05			Lce1a1	1.6112	0.000519428
Clec4g	-1.47401	1.06248e-05			Nt5c3	1.00219	0.000519428
Gcgr	-2.14135	1.05522e-05			Cyp2a5	-1.46339	0.000520531
Bhmt2	-3.19978	1.03887e-05			Klf15	-1.08236	0.000520531
Cfi	-3.27669	1.02202e-05			Cst6	1.18203	0.000521379
Apol6	1.82845	1.01012e-05			Gyk	1.13995	0.000521379
Lgals3bp	2.39704	9.4981e-06			Ube2t	1.35946	0.000521379
Slfn9	2.1525	9.42818e-06			Dlgap5	1.09177	0.000526989
Ddx4	2.02999	9.42818e-06			Marcksl1	1.05941	0.000526989
Aqp8	-3.13717	8.75112e-06			Duoxa1	1.4932	0.000526989
Mup3	-4.44623	8.59935e-06			Foxm1	1.1929	0.000527319
Pah	-4.17055	8.56844e-06			Rprm	-1.04561	0.000530183
Birc5	1.99157	8.56844e-06			Npr3	-1.04181	0.000530438
Plac8	1.59555	8.54682e-06			Gstm1	-1.24858	0.000531569
Cyp3a41a	-5.89578	8.44879e-06			Mapt	-1.24822	0.000531608
Cdca8	1.62452	8.32401e-06			Gbp4	1.84653	0.000531608
Tpx2	1.51306	8.32401e-06			Irf8	1.01532	0.000533296
Ifih1	1.72999	8.09269e-06			Creg2	1.2706	0.000534021
Cpb2	-3.19162	8.0448e-06			Tmem106a	1.17658	0.000537486
Aadac	-3.64562	7.76548e-06			Agrp	-1.13811	0.000538626
Ms4a4d	1.86072	7.75473e-06			Pln	1.62792	0.00053863
Ly6i	1.55371	7.75473e-06			Olfr1362	-1.1861	0.000538841
Azgp1	-3.8655	7.75473e-06			Timd4	1.17517	0.000546067
Ccna2	1.55076	7.75473e-06			Incenp	1.12382	0.000546067
Cenpe	1.78515	7.52318e-06			Lyve1	-1.03411	0.000546067
Gbp6	2.67295	7.52318e-06			Chaf1a	1.1529	0.000546067
Ly6a	1.51515	7.46164e-06			C1ra	1.04774	0.000550219
Phf11	2.763	7.46164e-06			Cenpk	1.57044	0.000550978
Cyp2d10	-3.3416	7.44187e-06			Gp2	1.45445	0.000560403
E2f7	1.5725	7.37143e-06			Gm5431	1.12766	0.000562494
Mnda	1.69707	7.36637e-06			Lce1b	1.3775	0.000564015
Cyp3a44	-3.87805	7.36637e-06			Serpinf2	-1.15132	0.000564015
Cps1	-4.94334	7.35061e-06			Krt13	2.30785	0.000564296
Socs1	2.29067	7.28254e-06			Mt4	1.93774	0.000577489
Hamp2	-2.95444	7.28254e-06			Serpina3g	1.34478	0.000584252
Muc4	2.87665	7.28254e-06			Oip5	1.21981	0.000585301
Cyp4f15	-1.48924	7.10831e-06			Rad54l	1.17022	0.000588479
2810417H13Rik	1.65496	7.10831e-06			Syt12	1.41035	0.000591555
Myh4	2.71355	6.75725e-06			Serpinb3a	1.74881	0.000601844
2010003K15Rik	-3.32158	6.75725e-06			Tnfrsf18	1.1199	0.000601844
Fabp1	-2.50572	6.75725e-06			Csta	1.44701	0.000601844
Apol9a	2.43677	6.65436e-06			Dio2	1.11915	0.00060353
Ccr5	1.85637	6.65436e-06			Hk3	1.00936	0.00060353
Sult2a3	-3.4369	6.65436e-06			Tapbp	1.07832	0.000603867
Cd274	1.93682	6.54318e-06			Nampt	1.07474	0.000611599
Sectm1b	2.53408	6.49239e-06			Dgkg	-1.10024	0.000611599
Epsti1	1.98275	6.18278e-06			Ogfr	1.10104	0.00061368
Pttg1	1.86238	5.76548e-06			Slc5a9	1.29307	0.00061368
Ces1b	-2.69325	5.73637e-06			Wfdc12	1.23824	0.000614665
Gbp1	1.95368	5.64436e-06			Ripk3	1.26539	0.000614665
Cxcl9	3.40689	5.61998e-06			C130026I21Rik	1.34247	0.000614665
Pyhin1	2.31582	5.58841e-06			Pld4	1.13809	0.000614665
Serpina11	-2.32455	5.53037e-06			Gm11428	1.56394	0.000616621
Uox	-3.85954	5.28112e-06			Serpinb13	1.53754	0.000621608
Saa1	5.48962	5.00645e-06			Uba7	1.30524	0.000621608
Ptx3	2.3743	4.97764e-06			BC055004	1.25418	0.000621608
Tor3a	1.89604	4.95966e-06			Apoa5	-1.74333	0.000625689
Iigp1	1.9539	4.90472e-06			Mcm2	1.06262	0.000625689
Eif2ak2	1.97375	4.80285e-06			BC100530	1.5261	0.000625689
Gys2	-2.44007	4.80285e-06			Colec10	-1.18999	0.000625689
Fam26f	2.23492	4.80285e-06			Ifitm7	1.2734	0.00063057
Gnmt	-2.66559	4.71838e-06			Abcg5	-1.01138	0.00063057
Ifnb1	3.66022	4.71838e-06			Gdf3	1.67335	0.00063057
Chit1	3.0348	4.71838e-06			Mcoln2	1.03125	0.000631098
Sct	3.31238	4.60605e-06			Cenph	1.50035	0.000638883
Tgtp1	1.90659	4.53909e-06			Wfdc5	1.37929	0.000641096
Gltpd2	-2.9832	4.46723e-06			Hs3st1	-1.02104	0.000641096
Akr1c20	-4.84424	4.26825e-06			Defb3	1.21339	0.000641096
Slfn10-ps	2.28084	4.26825e-06			Agtr1a	-1.05239	0.000648355
Trim30d	2.08843	4.26825e-06			Fmo1	-1.1295	0.000650256
Ddx60	2.56175	4.19567e-06			Gm8995	1.10658	0.000651243
Apol9b	2.39367	4.10583e-06			Aadac	-1.18783	0.000655395
Gbp2	1.65714	4.10583e-06			Darc	1.16926	0.000655395
Ifi47	1.78194	4.10583e-06			Klk1b3	1.40448	0.000655395
Tmprss6	-3.24452	4.10583e-06			9130017N09Rik	1.88456	0.000657178
Rdh7	-4.63187	4.10583e-06			Lphn3	-1.26423	0.000657335
Mefv	1.95676	4.10583e-06			Svip	-1.04043	0.000657335
Gckr	-2.92511	4.10583e-06			Krtap17-1	-1.22001	0.000663837
Ifi204	2.13678	4.10583e-06			Gsdmc	1.32038	0.000667479
Serpina3m	-3.50851	4.10583e-06			Art2a-ps	1.28022	0.000673218
Vcan	1.72801	4.10496e-06			Ear3	-1.64945	0.00067373
1300017J02Rik	-4.72519	4.10496e-06			Gramd3	1.11984	0.000675292
Apoc4	-4.35074	4.10496e-06			Sprr2d	2.47181	0.000688535
Serpina1d	-2.438	4.10496e-06			Klk1b27	1.40077	0.000689886
Abcg5	-2.83688	4.10496e-06			P2ry13	1.06488	0.000700627
Mlkl	1.82797	4.0784e-06			Hepacam2	-1.2487	0.000704323
Cyp2c39	-3.14942	4.0498e-06			Hap1	1.07165	0.000704323
Serpinf2	-3.64649	4.0498e-06			Kprp	1.63448	0.000706094
Siglec1	2.41824	4.03212e-06			Ncf4	1.2295	0.000710628
Ly6e	1.96379	4.03018e-06			BC023105	1.1962	0.000715885
Cyp2j5	-3.10028	3.98219e-06			Cenpp	1.3394	0.000719771
D14Ertd668e	2.61827	3.83352e-06			Ccl11	1.03485	0.000719771
Il1rn	2.43147	3.60989e-06			Lbp	1.15051	0.000725588
Gbp5	2.47631	3.52168e-06			Muc15	1.08518	0.000726133
Stat2	2.11587	3.45422e-06			Cldn8	-1.11369	0.000726133
Timp1	3.86588	3.26001e-06			Nkg7	1.0107	0.000726133
Plg	-4.91449	3.22717e-06			Fam54a	1.51561	0.000738423
Saa3	5.88921	3.22717e-06			Folr2	1.1111	0.000738423
Sectm1a	3.04486	3.22717e-06			Col5a2	1.1579	0.000747116
D17H6S56E-5	1.99756	3.22717e-06			Lor	1.76743	0.000758944
Mug2	-4.42275	3.025e-06			Slc15a3	1.06203	0.000758944
Il18bp	2.35647	3.00356e-06			Itgam	1.01325	0.000759096
Herc6	1.99157	2.96051e-06			Prss27	1.41511	0.000761235
Areg	3.00614	2.95051e-06			Cdt1	1.06479	0.000761892
Apof	-4.0073	2.95051e-06			Slfn8	1.14528	0.00076544
Slco1b2	-4.89808	2.93873e-06			Gm16499	-1.20355	0.000766563
Apod	2.65136	2.93858e-06			Hilpda	-1.00625	0.000771248
Ms4a6d	2.61661	2.93858e-06			Klk1	1.54475	0.000772
Apon	-2.58547	2.84727e-06			Hal	1.0044	0.000785664
Ccl12	3.18097	2.84727e-06			Chia	-1.32375	0.000792932
Gm4955	3.11648	2.72614e-06			Arg2	1.0337	0.000794735
Akr1c6	-6.11576	2.64932e-06			Muc16	-1.02428	0.000797157
Zbp1	4.06835	2.64932e-06			Pde8b	-1.07023	0.000797157
Ftcd	-3.50229	2.56095e-06			AI836003	-1.18035	0.000797157
Retnlb	3.61037	2.56095e-06			Otop3	1.32129	0.00079986
Asgr1	-2.9419	2.56095e-06			1110032A04Rik	1.08659	0.000799864
Plk1	2.11129	2.56095e-06			S100g	-1.51438	0.000800187
Trim30a	2.07597	2.56095e-06			Tspan7	-1.09384	0.000804778
Ccl3	2.58365	2.56095e-06			Gpihbp1	-1.04954	0.000804778
Irf7	4.5527	2.32863e-06			Ankrd22	1.00495	0.000822435
Ifit3	3.36103	2.32863e-06			Ddx4	1.46086	0.000822435
Hpd	-2.96131	2.30298e-06			Sgk2	-1.01691	0.000835296
Kng1	-4.14868	2.18328e-06			4930422G04Rik	1.24417	0.000844371
Igtp	2.13143	2.13174e-06			Tmeff2	-1.10383	0.000844371
H28	3.4982	2.08157e-06			Gm94	1.57281	0.000844371
Gulo	-2.88129	2.08157e-06			Il12rb1	1.21527	0.000844371
Oas1a	3.34752	2.02667e-06			Ezh2	1.05854	0.000844371
Fmo3	-2.63963	1.92768e-06			Dsg1a	1.65636	0.000850712
Ifit2	3.27465	1.85359e-06			C230035I16Rik	-1.4317	0.000851833
Fga	-3.32022	1.75992e-06			Sort1	-1.05	0.000858261
Cmpk2	3.1363	1.74971e-06			Mad2l1	1.04791	0.000860985
Cxcl1	3.5701	1.67155e-06			Scgb3a1	-1.39475	0.000860985
Gbp3	2.19338	1.62058e-06			Il12b	1.46112	0.000870252
Pzp	-3.5291	1.58861e-06			Calml3	1.25748	0.00087158
Dmgdh	-3.60214	1.57556e-06			Nkpd1	1.71037	0.000872531
Ifi202b	2.91927	1.55972e-06			Ear7	-1.55814	0.000876673
Slfn4	4.05004	1.55403e-06			Them5	1.68034	0.000876673
Xaf1	2.33457	1.38165e-06			1110020A10Rik	1.92434	0.000876673
Serpina3k	-5.74806	1.38165e-06			Kif18b	1.31431	0.000884332
AI607873	3.00161	1.30896e-06			Parm1	1.00442	0.000885163
Cyp2d26	-4.94397	1.29595e-06			Ogn	-1.06285	0.000885163
Ch25h	3.47015	1.29595e-06			Lce3c	1.38027	0.000888258
Il6	4.57124	1.15179e-06			Slc6a15	-1.1349	0.000888442
Rtp4	2.37237	1.15179e-06			Cbs	-1.08382	0.000888442
Oas1f	3.3518	1.10922e-06			Slc4a5	-1.02854	0.000888442
Apoa1	-5.20282	1.05987e-06			Pml	1.04154	0.000888442
Gls2	-2.54774	1.05987e-06			BC006779	1.04086	0.000890488
Ccl4	3.4712	1.03474e-06			Lhx2	1.12979	0.000890488
Irgm1	2.30788	1.03474e-06			Krt78	1.7644	0.000890488
Afm	-5.32508	1.0074e-06			Gpr176	1.01114	0.000890488
Agxt	-5.33634	1.0074e-06			Tapbpl	1.02088	0.000892573
Fgg	-6.24385	1.0074e-06			Cxcl3	1.02514	0.000893504
Dhx58	2.89227	1.0074e-06			Gm8579	1.55891	0.000906086
Mbl2	-6.25757	1.0074e-06			Gvin1	1.32549	0.000906086
Serpinc1	-6.38371	1.00147e-06			Lrrc10	1.53638	0.000906086
Oas2	3.28735	9.85544e-07			Tyms-ps	1.00217	0.00090639
Apoa5	-5.08883	9.56064e-07			Cyp2c40	-1.89091	0.000907041
Aldob	-6.64816	9.43307e-07			Lce3f	1.50296	0.000909715
Gm14446	3.28118	9.43307e-07			Klra23	1.1182	0.000911706
Oas3	3.5936	9.33613e-07			Slco1b2	-1.99719	0.000911706
Pon1	-2.99258	9.3102e-07			BC030867	1.06811	0.000912825
Cyp2c40	-4.76372	9.3102e-07			Tmsb15a	1.61429	0.000913073
Apob	-4.02664	8.73351e-07			Igf1	1.03561	0.000919703
Isg15	4.34357	8.73351e-07			Speer4b	1.08718	0.000919993
Cyp2c29	-4.37996	8.73351e-07			Sult1a1	-1.08684	0.000920919
F2	-5.39973	8.73351e-07			Scgb1a1	-1.20155	0.00092357
Ahsg	-4.3917	8.73351e-07			Fam83e	1.00995	0.000931557
Ces1c	-5.04284	8.73351e-07			Gm16880	-1.18112	0.000931557
Fcgr1	3.39805	8.73351e-07			Ces1c	-1.94632	0.000931573
Gc	-4.99079	8.42914e-07			Fcer1g	1.10329	0.000934479
Oasl1	4.72164	8.38261e-07			Krt4	2.21402	0.000942453
Fgb	-6.90333	8.38261e-07			Chtf18	1.01379	0.000947844
Mx1	3.6436	7.74021e-07			Clca3	1.84116	0.000952295
Cyp2c37	-4.37512	7.74021e-07			Lrat	-1.04729	0.000958655
Oasl2	3.15437	5.47482e-07			H2-T24	1.33995	0.000963667
Slc27a5	-4.68738	5.35571e-07			Hist1h1d	1.3104	0.000975478
Sult2a6	-5.56731	5.35571e-07			Lce1g	1.5574	0.000981092
Ambp	-6.77386	3.57323e-07			Scel	-1.03663	0.000983387
Usp18	3.26056	3.57323e-07			Casp4	1.23136	0.000988822
Cxcl10	6.14683	3.57323e-07			H2-Q1	-1.21583	0.000990826
Mx2	4.22947	3.57323e-07			Cntn1	-1.12722	0.000990826
Ccl7	5.52378	1.83312e-07			Cyp4b1	-1.22097	0.000995025
Alb	-8.48209	1.83312e-07			Lilrb4	1.35547	0.000997732
Apoa2	-6.83211	1.83312e-07			Gsdma	1.75014	0.000998908
Serpina6	-5.54238	1.83312e-07			Tppp	-1.06215	0.000998908
Ifi44	3.98498	1.83312e-07			Rgn	-1.38853	0.000998908
LOC100504785	-4.63031	1.83312e-07			Pah	-1.25047	0.00100296
Cxcl11	5.49552	1.83312e-07			Rgs16	1.25648	0.0010074
Apoh	-6.40509	1.83312e-07			Lgals7	2.26311	0.0010088
Ifit1	4.23213	1.83312e-07			Cd3d	1.05496	0.00101712
Irg1	5.60116	1.83312e-07			Slc27a5	-1.82215	0.00101847
2210407C18Rik	5.3237	1.83312e-07			Plk5	-1.05031	0.00102355
Rsad2	4.79787	1.83312e-07			Sdcbp2	1.02573	0.00103257
Ccl2	5.31311	1.27876e-07			Pax9	1.0091	0.00104774
					Pnp	1.07284	0.00104942
					Cnpy1	-1.07988	0.00105224
					Cyp1a1	-1.16517	0.00105722
					Adam8	1.0582	0.00105999
					Clec14a	-1.29897	0.00106543
					Cd8b1	1.20793	0.00106563
					Calm4	1.40945	0.00108584
					Ptpru	-1.11123	0.00108584
					AW112010	1.38896	0.00108872
					Lap3	1.22796	0.0010952
					H2-Bl	1.3248	0.00110907
					Traip	1.54141	0.00112948
					Nfkbie	1.11436	0.00113935
					Ccnf	1.10978	0.0011423
					Col1a2	1.22542	0.00114312
					Ucp1	-1.25952	0.00114312
					2510049J12Rik	1.00916	0.00114312
					Ube2l6	1.29371	0.00114312
					Fyb	1.18215	0.00117678
					Uox	-1.09604	0.00119183
					Acot1	-1.11598	0.00119879
					Hmgcs2	-1.19497	0.00121184
					Speer4d	1.24416	0.00121184
					Gpr84	1.42154	0.00121481
					Ccr9	1.25252	0.00121513
					Ephx3	1.01761	0.00122862
					Gpr162	1.01704	0.00123237
					Aicda	1.16521	0.00123993
					Ces2b	-1.18624	0.00124703
					Krt32	1.45581	0.00127338
					Akr1c20	-2.11265	0.00128074
					Kcne2	-1.16781	0.00128215
					Pla2g5	1.00929	0.00128246
					Nsl1	1.04382	0.00130092
					Bcan	-1.3036	0.00132979
					Nmral1	1.1532	0.00133699
					Il10ra	1.13172	0.00133699
					Krt6a	1.27357	0.00134054
					Serpina3n	1.61696	0.0013451
					9930111J21Rik2	1.36727	0.00134559
					Lcp2	1.06541	0.00135049
					Orm1	2.17755	0.00135372
					Tmem121	1.00743	0.00135372
					Cyp7b1	1.11514	0.00135372
					Lce1m	1.29315	0.00135514
					Crisp1	1.59048	0.00135567
					Fcamr	1.11885	0.00135567
					Rad54b	1.08581	0.00136896
					Gpr155	-1.03632	0.00137185
					Gm11127	1.00422	0.00137704
					Slfn3	1.37141	0.00137704
					Cps1	-2.47225	0.00137704
					Ear1	-1.82198	0.0013873
					Cyp26b1	-1.84518	0.00139042
					Nppa	1.22389	0.00139969
					Camk4	1.05085	0.00141253
					Apoc2	1.08195	0.00143391
					Cd244	1.04713	0.00145206
					Klk12	1.8344	0.00145206
					Aplnr	-1.01948	0.00147195
					2310050C09Rik	1.38699	0.00147764
					Bcl3	1.30638	0.00148868
					Fen1	1.10559	0.00149311
					1190002F15Rik	1.09548	0.00150243
					Ifi203	1.15217	0.00153176
					Zbtb44	-1.15147	0.00153282
					Pla2g4b	1.07061	0.00153848
					C4bp	-1.5701	0.00154897
					Cyp4a14	-2.01326	0.00154897
					Klra7	1.06162	0.00156228
					Myh10	-1.06266	0.00156228
					Hcls1	1.01588	0.00156228
					Steap4	1.26833	0.00156228
					B230208H11Rik	-1.2353	0.00156853
					Emr1	1.00219	0.00160174
					Ces1h	1.3467	0.00163775
					Gzmk	1.3818	0.00164571
					Rdh7	-1.75461	0.00164571
					Cd300lf	1.21567	0.00166748
					Rasa4	1.01404	0.00166933
					Eme1	1.17376	0.00167745
					Il1b	1.01645	0.00168488
					Lrrc4	1.22216	0.00168488
					Ifi35	1.12397	0.0016943
					Cyp2d22	-1.12344	0.0016943
					Ear10	-1.68173	0.0016943
					Lgals9	1.19383	0.00169492
					Casc5	1.6761	0.00171276
					Ncapg2	1.12524	0.00171704
					Cdc6	1.34001	0.00171704
					Ltbp4	-1.18904	0.0017176
					Mup1	1.27855	0.0018077
					Ccr2	1.22925	0.0018077
					Tspan18	-1.01803	0.00183736
					Cyp2d10	-1.25749	0.00184373
					Cenpi	1.55137	0.00184373
					Igfbp6	-1.11655	0.00184373
					Ccl9	1.1837	0.00185032
					E030010N08Rik	1.13813	0.00186483
					Ftcd	-1.11537	0.00188638
					1700086L19Rik	1.15668	0.00188902
					Mmp25	1.01969	0.00193137
					Ankrd1	1.06304	0.00193579
					Vegfb	-1.18976	0.00195378
					Klrk1	2.0137	0.00198906
					Slc16a9	-1.10194	0.00198906
					Pole	1.31856	0.00202053
					Rbp2	1.08047	0.00207456
					Tap2	1.75867	0.0021059
					D630042F21Rik	1.71859	0.00211349
					Zmynd15	1.08256	0.00219697
					Ly6f	3.79342	0.00220606
					Ugt2b36	-1.30769	0.00221769
					Serpinb3b	2.3154	0.00223261
					Ear11	-1.68126	0.00223878
					Cyp2c70	-1.40402	0.00224052
					Steap1	1.15163	0.0023259
					Dsc1	1.08109	0.00233082
					Sprr1b	1.20314	0.00233428
					Apob	-1.3259	0.00240296
					Icos	1.18515	0.00241759
					Kcna6	-1.0084	0.00243054
					Ucma	1.35364	0.00249516
					Itgb1bp3	-1.24462	0.00255331
					Pim1	1.1756	0.00255331
					Sirpb1b	1.08884	0.00256189
					Pdzd2	-1.14448	0.0025885
					Plagl1	-1.20012	0.00261358
					Suv420h2	-2.5665	0.00263544
					Cdsn	1.35339	0.00263867
					Sbsn	1.22496	0.00264036
					Synm	-1.087	0.00264188
					Gm4951	1.34083	0.00266813
					Phf19	1.0295	0.00270184
					Gda	1.14755	0.00270255
					Sim2	1.09481	0.00270255
					Etv6	1.03679	0.0027118
					Kng1	-1.3305	0.00272343
					Bmp6	-1.13595	0.00272947
					Tnni3	1.01432	0.00274581
					Gpr83	1.05436	0.00274784
					Tnip3	1.16501	0.00285647
					Klra16	1.02967	0.00289936
					Sprr2e	1.22958	0.00290619
					Rcc1	1.18093	0.00292937
					1300017J02Rik	-1.53829	0.00295268
					Dapl1	1.12465	0.00299903
					Gsg2	1.00001	0.00307817
					Cxcl1	1.65794	0.00310306
					Sdr9c7	1.00332	0.00318217
					H2-M2	1.2119	0.00320192
					Klk14	1.14442	0.00324499
					Sprr3	2.08791	0.00325401
					Stfa1	1.38258	0.00327277
					Serpina3m	-1.13165	0.00331155
					Scube1	-1.09181	0.00334204
					Snhg11	-1.13775	0.00344329
					Ndc80	1.0917	0.00344464
					S100a7a	1.24302	0.00362344
					Ear6	-1.45532	0.00364787
					Abcc8	1.09442	0.0037751
					Plvap	-1.0044	0.00386061
					Tnfaip6	1.02363	0.00391165
					Gpr87	1.10331	0.00398228
					Ada	1.20814	0.0040822
					Ugt2b5	-1.33055	0.00411114
					Aspm	1.03639	0.00411272
					Gm1966	1.39184	0.00412022
					Nr1d1	-1.11346	0.00412928
					Krt6b	1.9768	0.00419351
					Spry1	-1.08576	0.00422458
					Trim12c	1.29533	0.00436152
					Mdm4	1.72526	0.00448257
					4932415M13Rik	1.32355	0.00450953
					Deptor	-1.1864	0.00457575
					Cyp2c37	-1.39144	0.00457575
					Gpr35	1.05912	0.00464677
					Kap	-1.04606	0.00471984
					Pclo	-1.00794	0.00475624
					Apoc4	-1.30034	0.00475624
					Baat	-1.06505	0.00483507
					Serpina3f	1.53517	0.00483507
					Ahsg	-1.58309	0.00495205
					Tmprss4	1.05479	0.00495595
					Wnt7b	1.08931	0.00515213
					Sgol2	1.31809	0.00519931
					Cyp2c29	-1.31741	0.00520459
					Cyp3a44	-1.23171	0.00525139
					Apof	-1.2508	0.00533094
					Cpa4	1.10261	0.00551957
					Sema6a	-1.07628	0.00567696
					Serpina3k	-2.58598	0.00579375
					Stfa3	1.42514	0.00587516
					Klk10	1.02389	0.00595109
					Pappa	-1.01074	0.006009
					D030029J20Rik	-1.34802	0.00629882
					Fam57a	1.22811	0.00640929
					Ctsc	1.00575	0.00647004
					Tgm3	1.50374	0.00662958
					Kifc2	-1.00384	0.00668363
					BC048679	-1.03262	0.00682718
					Mastl	1.10268	0.00686199
					Glycam1	1.51614	0.00709205
					Hrnr	1.12025	0.00732115
					Pipox	-1.01209	0.00801651
					Myrip	-1.00913	0.00814567
					Krt16	1.40553	0.00825488
					Tns1	-1.05028	0.0084982
					Gen1	1.0478	0.00869524
					Igfbp2	-1.00095	0.0103386
					Ly9	1.57139	0.0106517
					Defb6	1.33479	0.0113043
					Cyp3a25	-1.25501	0.0115498
					Trim12a	1.11487	0.0119245
					Neurog1	-1.2055	0.0120476
					Krt85	1.37587	0.0121943
					Cenpa	1.30474	0.0123945
					Cyp3a16	-1.07842	0.0143748
					Tro	1.11429	0.0147795
					Hsd17b2	1.12221	0.0156259
					Dcaf12l2	1.24662	0.0156336
					Oas1b	1.88676	0.0157921
					Kcnj14	-1.09375	0.0158119
					Mosc1	-1.05179	0.0159293
					LOC100504785	-1.6739	0.0188957
					Klra2	1.04661	0.0219692
					Rab27a	1.05565	0.02347
					Gpr113	-1.54123	0.0249201
					Rab11fip4	-1.38103	0.0252921
					Prm1	1.01057	0.0276419
					Prmt1	1.11856	0.0335836
					Expi	1.37773	0.0336071
					Tnxb	-1.13279	0.0363779
					A930037O16Rik	-1.04767	0.0373389
					Col2a1	2.04918	0.0469565

## Sheet: GSE63786
3days				5days
ID	logFC	adj.P.Val		ID	logFC	adj.P.Val
Saa2	6.91876	1.00095e-05		Irf7	5.25128	0.000100202
Ifnb1	7.03948	1.00095e-05		Kif22	2.77141	0.000100202
Timp1	6.19062	1.00095e-05		Tgfbi	2.48641	0.000100202
Chit1	5.59341	1.57701e-05		Ifit1	4.04284	0.000100202
Fcgr1	4.72507	1.57701e-05		Ccnb1	2.77382	0.000100202
Saa1	7.88301	1.57701e-05		Oas1f	4.30495	0.000100202
Oasl1	5.33767	1.57701e-05		Aox3	-2.6165	0.000100202
Mmp8	4.16127	1.57701e-05		C3ar1	2.88826	0.000100202
Ifit3	4.29817	1.57701e-05		Gpr176	2.68479	0.000100202
Oas1a	4.46272	1.57701e-05		Ifit3	3.9899	0.000100202
Oas1f	4.30104	1.57701e-05		Timp1	5.16061	0.000100202
Irf7	5.42681	1.57701e-05		Fcgr1	4.47964	0.000100202
Cngb3	3.8502	2.19582e-05		Cngb3	3.21069	0.000100202
Ubd	6.45358	2.19582e-05		Ncapg	2.59734	0.000100202
Mefv	3.58137	2.19582e-05		Mxd3	2.84797	0.000100202
Slfn3	5.20546	2.90697e-05		Cenpe	2.63401	0.000100202
Mx2	4.14467	3.09763e-05		Oas1a	4.50545	0.000100202
Cyp7b1	3.50362	3.19964e-05		Rad51ap1	2.30136	0.000100202
Cfb	4.14549	3.19964e-05		Cdca5	2.66539	0.000100202
Irg1	6.96239	3.19964e-05		Clca2	3.03472	0.000100202
Zbp1	5.0107	3.19964e-05		Gas2l3	2.06827	0.000100202
Oas3	4.7855	3.19964e-05		Spag5	2.34544	0.000100202
Mx1	5.35963	3.41523e-05		Aurka	2.8034	0.000100202
Ccl7	7.04989	3.48169e-05		AI607873	4.12985	0.000100202
Ifi44	4.46661	3.79117e-05		Usp18	3.41475	0.000100202
Ifi204	3.99209	3.79117e-05		Shcbp1	2.8252	0.000100202
Ccl4	4.87823	4.48997e-05		I830012O16Rik	4.03302	0.000100202
Isg15	5.34982	4.53301e-05		Kifc1	2.24406	0.000100202
Usp18	3.49641	4.55252e-05		Mlkl	2.65528	0.000100202
C3ar1	3.0339	4.55252e-05		Plk1	2.80113	0.000100202
Slfn4	6.12583	4.74051e-05		Chit1	4.8957	0.000100202
Slfn10-ps	3.5187	4.74387e-05		Cdk1	2.82576	0.000100202
Gpr176	2.97658	4.8345e-05		Ckap2	3.04349	0.000100202
I830012O16Rik	4.51419	4.99838e-05		Tpx2	2.68766	0.000100202
Pla1a	5.26252	5.6084e-05		Oas3	4.91757	0.000100202
D14Ertd668e	3.75506	5.64126e-05		Uhrf1	2.78437	0.000100202
Pyhin1	3.39318	5.9045e-05		Cenpm	2.28527	0.000100202
Slc7a8	3.10083	6.40932e-05		Ms4a6d	3.77978	0.000100202
Ms4a7	4.00448	6.40932e-05		Ska1	2.41791	0.000100202
Cxcl9	6.35325	6.40932e-05		Ccdc99	2.45961	0.000100202
Tcstv3	3.44509	6.71834e-05		Cxcl10	6.73672	0.000100202
Pstpip1	2.69388	6.72723e-05		Top2a	2.66893	0.000100202
Tgfbi	2.56107	6.88776e-05		Ccnb2	2.41168	0.000103173
Il18bp	4.33231	7.33357e-05		Gpr84	2.21479	0.000106772
Dhx58	3.21539	7.52128e-05		Cfb	3.65705	0.000107223
Cxcl10	7.02267	7.52128e-05		Psat1	2.43545	0.000107223
Mlkl	3.17878	7.70118e-05		Slfn3	4.83028	0.000107223
Slfn2	2.67026	7.92933e-05		Fignl1	2.36205	0.000107223
Eif2ak2	2.51063	7.99508e-05		Cdca3	2.74493	0.000107223
Cmpk2	3.21983	7.99508e-05		Ccr5	3.40103	0.000107223
Saa3	9.05961	8.15328e-05		2410066E13Rik	-2.18581	0.000107223
Il1r2	3.45271	8.18837e-05		Ckap2l	2.41516	0.000107466
Mdm4	3.43599	8.18837e-05		Cxcl9	5.94662	0.000107466
Mnda	3.41352	8.18837e-05		Xaf1	2.98607	0.000107466
Prss22	3.78464	8.18837e-05		Il18bp	3.75192	0.000107466
Cd72	3.27143	8.18837e-05		Camk2n1	-1.62831	0.000107466
Ptx3	4.83967	8.18837e-05		Melk	2.52985	0.000107466
Xaf1	3.04803	8.18837e-05		Kif2c	2.47122	0.000107466
Slfn9	3.33697	8.18837e-05		Cep55	2.75338	0.000107466
Ccl2	6.76387	8.18837e-05		Oas1b	2.92024	0.000107466
Chl1	4.46339	8.18837e-05		Mthfd2	2.08556	0.000107466
Spic	2.57449	8.51457e-05		Kif18b	2.13291	0.000107466
H2-Q8	3.50233	8.51457e-05		Lgals9	2.26092	0.000107466
Tnc	2.83989	8.51457e-05		Mx1	5.29224	0.000107871
Apol9b	4.63389	8.86828e-05		Ifit2	3.81563	0.000107871
Aif1	3.84051	9.15697e-05		Birc5	2.56114	0.000107871
Tcstv1	3.04882	9.15697e-05		Exo1	2.45684	0.000107871
Ccl11	2.53142	9.48915e-05		Ch25h	2.80141	0.000107871
Ccr5	3.64273	9.60038e-05		Irg1	6.57183	0.000107871
Gm4955	3.37676	9.60038e-05		Dscc1	2.26625	0.000107871
Lcn2	3.48942	9.99068e-05		Oasl1	5.06576	0.000107871
1300002K09Rik	3.01081	0.000105835		Mx2	3.85216	0.000108884
9930023K05Rik	3.68202	0.000105835		Saa1	5.87836	0.000108884
Cxcl11	6.15948	0.000108315		Clca1	2.54696	0.000108884
AI607873	4.47201	0.000108315		Neil3	2.21722	0.000108884
Chrna7	2.54216	0.000108315		Ccl2	6.03909	0.000108884
Saa4	4.09114	0.000108315		Cst8	-3.47805	0.000111275
Car8	-2.47261	0.000108315		Ppa1	1.92204	0.000111275
Cd209b	-3.01974	0.000108315		Cdc20	2.50357	0.000111275
Oasl2	3.1967	0.000109839		Mcm5	2.01137	0.000112546
Kcnip4	-2.41778	0.000110634		Hist1h2ao	2.26796	0.000112906
Plekha4	2.50959	0.000110634		Mcm10	2.31026	0.000112906
Olfr295	2.56298	0.000110634		Fanci	2.25968	0.000112906
Ifi27l2b	3.53813	0.000116775		Slc7a8	2.69457	0.000112906
Apod	5.35961	0.000117189		Cenpp	2.20881	0.000116322
Ifi27l2a	3.47077	0.00012571		Fen1	1.89312	0.000116689
Oas2	4.28001	0.000136822		Fam54a	2.41694	0.000116689
Rgs16	2.95923	0.000136822		Rtp4	2.22787	0.00011726
Prm1	2.98335	0.000143123		Isg15	5.43258	0.00011726
Il1rn	3.04944	0.000147994		Slfn10-ps	3.54527	0.00011726
Hpcal4	-2.44485	0.000147994		Lgals3bp	2.56166	0.00011726
Tff2	-4.81192	0.000155032		Ccdc86	1.72981	0.000117378
LOC100504785	2.92429	0.000158641		Ripk3	1.77051	0.000117378
Cd300lf	2.22354	0.000159489		Saa2	3.8552	0.000117378
Ifit1	4.25111	0.000172097		Nsl1	1.74968	0.000117518
Mthfd2	2.57286	0.000172097		Dnahc7b	-2.10539	0.000117518
Oas1b	3.10997	0.000173372		Cyp7b1	2.79378	0.000119728
Scgb3a1	-5.67932	0.000177697		Spc25	2.52749	0.000120505
Aoah	2.53897	0.000179218		Oasl2	3.10672	0.000120505
Ms4a6b	3.00936	0.000179218		Syt8	2.46327	0.000121932
Gbp6	3.50259	0.000179218		Foxm1	2.24686	0.000121932
LOC639910	2.07124	0.000181749		Mapt	-1.67803	0.000122936
Siglec1	2.74381	0.000181749		Cdkn3	2.47792	0.000122936
Bst2	2.81849	0.000192962		Tbc1d30	-1.72068	0.000122936
Lgmn	1.96338	0.000192962		Car8	-2.10189	0.000122936
Gpr84	2.10863	0.000192962		Chl1	4.97717	0.000122936
Stat2	2.60247	0.000198237		Slfn9	3.41062	0.000122936
Syt12	2.20065	0.000198237		Krt23	-1.58673	0.000122936
C630050I24Rik	2.73698	0.000198237		2810417H13Rik	1.78615	0.000122936
Mt2	3.51025	0.000198237		Sectm1b	2.04743	0.000122936
S100a14	3.32566	0.000198237		Slc6a15	-1.83642	0.000122936
Ifitm3	2.05667	0.000198237		Rad51	2.54005	0.000122936
Fcgr4	3.25116	0.000198237		Eif2ak2	2.29308	0.000122936
Cd207	-2.23662	0.000198237		Sgol1	2.41637	0.000122936
Areg	2.99738	0.000198237		Tacc3	1.96736	0.000122936
Tnfrsf9	2.70132	0.00020324		Ifi44	4.37433	0.000122936
Tgm1	2.54258	0.00020324		Ect2	2.34606	0.000122936
Clec5a	2.11738	0.00020615		Plekha4	2.1209	0.000122936
Ccdc99	2.06792	0.00020631		Ccne1	2.32892	0.000122936
Ccl12	4.348	0.00020631		Gstt3	-1.46254	0.000122936
Plac8	2.66172	0.00020631		Mefv	3.12663	0.000122936
Daxx	2.01362	0.000206635		Ptpru	-1.57163	0.000122936
Scube2	-2.24266	0.000207687		Ube2t	1.61929	0.000122936
Pou3f1	4.38591	0.000207687		F630043A04Rik	2.20058	0.000122936
Psmb8	2.22936	0.000209809		Lgi3	-2.03162	0.000122936
Creg2	2.28168	0.000214675		Fam64a	2.85376	0.000122936
Slc15a3	2.34451	0.000214675		Aif1	3.61829	0.000122936
Gm14446	4.0819	0.000217336		Pbk	3.20464	0.000122936
Havcr2	1.98058	0.000219887		Tk1	2.488	0.000122936
Tmem106a	2.2021	0.000219887		1500035N22Rik	-2.26868	0.000122936
Casp4	2.30069	0.000229537		Pstpip1	2.21543	0.000122936
A430071A18Rik	-2.18576	0.000229537		Slc4a5	-2.5264	0.000122936
C130026I21Rik	2.33269	0.000229537		Iqgap3	2.57254	0.000122936
Slc37a2	2.68536	0.000229537		Ifitm7	1.78535	0.000123061
Slfn1	3.34648	0.000229537		Ms4a6c	3.38002	0.000123061
Entpd8	-2.39612	0.000229537		Zbp1	4.79087	0.000123061
Tlr1	2.05032	0.000229537		Cdca8	2.58821	0.000123061
Bpifb1	-5.58754	0.000229537		Ccna2	2.57105	0.000123061
Acnat1	-2.08406	0.000229537		Fhdc1	-1.91514	0.000123061
Ifitm7	1.99179	0.000229537		Svip	-1.42119	0.000123061
Sp110	1.84868	0.000231941		Ccl7	5.99773	0.000123061
Fyb	1.95194	0.000233321		Scgb1c1	-2.48248	0.000123061
Ch25h	3.19484	0.000233321		Kif11	1.80785	0.000123061
Socs1	2.5234	0.000234659		Ifnb1	5.5658	0.000123061
Phf11	3.35824	0.000256116		Cenpf	2.9321	0.000123061
Serpina3n	3.35057	0.000258232		D14Ertd668e	3.68767	0.000123061
Epsti1	2.94307	0.000261386		Dnahc5	-2.54083	0.000123061
Fam26f	4.10393	0.000264208		Hist1h1b	1.90804	0.000123061
Serpina3f	4.93359	0.000273047		Ifi205	4.38278	0.000123061
Klrk1	2.59758	0.000277066		Ak7	-2.27376	0.000123061
Ms4a4c	3.5165	0.000286927		Mfap3l	-1.61571	0.000123061
Il6	4.72061	0.000286927		Hmmr	2.54276	0.000123061
Lhx2	3.29753	0.000286927		Depdc1b	1.90888	0.000124607
Olfr741	2.71847	0.000286927		Cdt1	1.57009	0.000127223
Ly6f	3.53902	0.000286927		Ccnf	2.18318	0.000127223
Atp2b2	-3.29495	0.000301921		Cyp3a13	-1.69499	0.000127223
Slamf9	2.62245	0.000312573		BC023105	2.09059	0.000128454
Cdh16	-2.25099	0.000315582		Ifi204	3.85248	0.000128897
Syt8	2.65286	0.000319272		Aurkb	2.42888	0.000128897
Csf3	2.76527	0.000319272		Gdf3	1.59261	0.000128897
Trafd1	1.9751	0.000319272		Cd177	2.53559	0.000128897
Rapgefl1	-1.89108	0.000319437		Sprr1a	2.86596	0.000130495
Gbp3	2.63236	0.000320702		Dhx58	3.06339	0.000130529
Slco4c1	-1.76025	0.000336171		Ncapd2	1.50151	0.000131104
Clca2	3.2579	0.000336551		Wdr93	-1.82138	0.000131104
Fasn	-1.81766	0.000336551		Pdyn	3.12008	0.000131104
Ms4a6d	3.82409	0.000336551		Ifi27l2a	3.57011	0.000131223
Hk3	2.94499	0.000336551		Plekhb1	-1.68227	0.000132104
Msr1	3.97613	0.000336551		Lgals1	1.77479	0.000132104
1500035N22Rik	-2.27359	0.000348634		Chad	-3.08126	0.000132451
Hap1	1.74028	0.000356515		Pole	2.39723	0.000132451
Cd209d	-2.05875	0.000360299		Asf1b	1.98904	0.000132451
Lgals3bp	2.52338	0.000360299		Dlgap5	1.74397	0.000134311
Apol6	3.9619	0.000360299		Chrna7	2.8122	0.000134311
Prok2	2.06462	0.000360299		Tmem173	1.84785	0.000134311
Tnfrsf1b	2.02757	0.000360299		C330027C09Rik	1.8059	0.000134311
Apoc2	2.69866	0.000360299		Clec5a	2.22154	0.000135263
Oas1g	2.73258	0.000360299		Incenp	1.43139	0.000135263
Fcer1g	2.19256	0.000364709		Gprasp1	-1.45342	0.000136042
Slc39a14	2.72542	0.000364709		Ccr2	1.80742	0.000141857
Sprr1a	2.85508	0.000364709		Ank3	-1.79684	0.000141857
Apol9a	4.67616	0.000364709		Bst2	2.7797	0.000141857
Tor3a	1.74147	0.000367828		Trip13	2.68246	0.000141857
Ifi205	5.29445	0.000367828		P2rx6	-3.53421	0.000141857
Svip	-1.79382	0.000373794		Arhgap11a	1.55106	0.000142588
Iqca	-2.93367	0.000375685		Lgmn	1.8332	0.000146698
Mfap3l	-1.66468	0.000385702		Fcgr3	1.78948	0.000146819
T2	-2.22382	0.000385702		2900006A17Rik	-1.9403	0.000146819
Gvin1	2.27658	0.000386741		Ces1e	-3.47699	0.000147887
Sectm1a	3.41428	0.000398044		Prc1	2.85506	0.000147887
Krt85	2.23478	0.00041583		Gla	1.90591	0.000147887
Lpxn	2.28229	0.000421294		Bid	1.50036	0.000147887
Tnfsf14	1.71599	0.00042201		Cenpk	1.97395	0.000147887
Apobec1	2.18833	0.000434647		2010001K21Rik	-1.40053	0.000147887
Adam5	-2.26908	0.000434647		Omd	-2.30294	0.000147887
Glt8d2	-1.99669	0.000434647		Kif20a	2.68598	0.000147887
Tnn	-1.87257	0.000434647		Gpt	-1.37906	0.000147887
Ptpru	-1.68797	0.000434693		Gins1	1.81991	0.000147887
Gbp5	3.17155	0.000434693		Gins2	2.32497	0.000147887
Fabp1	-2.97504	0.000434693		Slfn4	5.68097	0.000148816
Chad	-2.31172	0.000434693		Kif4	1.82152	0.000149696
Slc35f3	-1.93692	0.000434693		Anln	2.06338	0.000150223
H60c	-1.83751	0.000434693		Ly6i	1.70092	0.000150223
Gm16485	-1.78413	0.000434693		Psrc1	2.3905	0.000151713
Sectm1b	2.35381	0.000437622		Cd72	3.4655	0.000151713
Hsh2d	1.87325	0.000444336		Kntc1	1.77887	0.000160349
Gcg	1.79878	0.000444336		Slc16a6	1.44995	0.000160349
Trem2	2.03372	0.000444336		Brca1	2.12747	0.000160349
Iigp1	3.1257	0.000448071		Tnfsf8	2.2115	0.000160349
Orm2	3.2377	0.000448104		D230025D16Rik	-1.27906	0.000160349
Lrrc25	2.91787	0.000448104		Mki67	2.10083	0.000160349
Tspan12	-1.58223	0.000452241		Retnlb	2.22145	0.000160349
A930001A20Rik	-2.54816	0.000475148		Synm	-1.81899	0.000160349
E030046B03Rik	-1.77076	0.000475148		Cks2	1.78114	0.000160349
Ccl20	3.21668	0.000475148		Dnahc6	-2.27629	0.000160349
Alpl	3.17522	0.000475148		4930427A07Rik	1.56653	0.000160349
Cd209a	-2.1177	0.000485482		Gatm	3.23918	0.000160349
Spo11	1.53905	0.00048796		Apol9b	4.43108	0.000160349
Hmgcs2	-2.72464	0.000492866		Tmem50b	-1.32835	0.000161526
Trex1	2.49731	0.000492866		Gsta3	-2.25866	0.000161526
Slc7a5	1.73493	0.000492866		Cmpk2	3.13264	0.000161649
4921507G05Rik	1.76845	0.000497601		Tnfrsf9	2.93524	0.000162055
Parp9	1.97349	0.000497601		5330417C22Rik	-2.66727	0.000162601
Olfr1198	2.8834	0.000497601		Bmp6	-2.00591	0.000165152
Glt25d2	-2.16787	0.000497601		Pclo	-1.75088	0.00016916
Gzmc	2.66187	0.000504792		Gsg2	1.53156	0.00016916
Nav3	1.88932	0.000504792		E030046B03Rik	-1.42752	0.00016916
Snx25	-1.49173	0.000507277		Tmem106a	2.08424	0.00016916
Ido1	4.06658	0.000507277		Reep6	-1.44132	0.00016916
Six4	-1.72174	0.000519166		Maob	-1.48203	0.00016916
Ppy	1.70547	0.000519182		Fbxo5	1.24579	0.00016916
Trem3	1.57917	0.000521786		Dnaja4	-1.2449	0.000173408
Il12rb1	2.80789	0.000525533		Mcee	-1.26903	0.000178038
Ddx60	2.6373	0.000528782		Dtl	2.19436	0.000179456
Rnf213	2.19565	0.000542745		Selenbp2	-1.75598	0.000179456
Ccl5	1.77585	0.00054543		Fcgr2b	1.94121	0.000179456
Gm11127	1.74694	0.000546427		Trim30a	2.82533	0.000180207
Gtsf1	2.25176	0.000552494		D17H6S56E-5	1.46598	0.000180207
Cst8	-2.26709	0.000553084		Ifitm3	1.65665	0.000180207
Olfr374	2.90581	0.000553084		Cdkl2	-1.33075	0.000180207
Cttnbp2	-1.94038	0.000553084		Dhrs3	-1.5154	0.000180207
Gpr35	2.05815	0.0005572		1810010H24Rik	-2.13019	0.000180207
Ddc	-1.84949	0.0005572		Tspan12	-1.48256	0.000180207
Cyp2f2	-3.1783	0.000564166		Bex4	-1.3934	0.000180207
P2rx6	-4.09865	0.000564166		Fmo1	-1.87309	0.000180207
Car13	2.95157	0.000564166		Iigp1	2.88257	0.00018111
Retnlb	2.40206	0.000566767		Lrr1	2.54242	0.00018111
Nod2	1.7355	0.000585481		3830431G21Rik	-2.03787	0.000182897
Sfrp1	2.44726	0.000594035		Rgs16	2.88297	0.000183232
Ccrn4l	1.77649	0.000594035		Car13	2.73971	0.000183232
Ctps	1.68739	0.000594035		Ifi27l2b	3.3619	0.000183232
Gm5148	-1.72434	0.000594035		Gpr155	-1.4704	0.000183232
Ifit2	4.17535	0.000596515		4930547N16Rik	2.02254	0.000183232
9930111J21Rik2	2.12214	0.000596515		Slfn8	3.1404	0.000183232
Pgf	1.6512	0.000609785		Mnda	2.91891	0.0001833
Pon1	-3.36075	0.000609785		Mia1	-1.76163	0.000184312
H2-T22	2.20011	0.000609785		Tnfrsf11a	1.49099	0.00018491
Slc44a3	-1.93962	0.000609785		Tnfaip8l1	1.44383	0.000185302
Pycard	1.99191	0.000609785		Rnf213	2.17542	0.000186152
Dnahc5	-2.87204	0.000609785		Ms4a6b	2.90452	0.000189846
Sort1	-1.77126	0.00061452		Stat2	2.30245	0.000189846
Tubb6	1.69448	0.000621522		Cd300lf	1.9662	0.000189846
H2-K2	1.74377	0.000621522		Aoah	2.80925	0.000189846
Bcl2l15	2.11933	0.000621522		Tap1	2.69075	0.000189846
Cyp4f18	2.31465	0.000621522		Creg2	2.25428	0.00019087
Ms4a6c	3.60169	0.000621638		Irgm1	2.69238	0.00019087
Ly86	1.81578	0.000621638		Trem2	2.81881	0.00019087
Parp11	1.70665	0.000624468		E330016A19Rik	1.66313	0.00019087
Trim12a	1.77921	0.000624468		Gdpd2	-2.08222	0.00019087
Dnmt3l	1.78071	0.00062966		Pola1	1.27012	0.000191187
Fgl1	2.04477	0.000634333		Slc37a2	2.13146	0.000191461
2022-09-03	-1.97199	0.00064489		Cenpn	1.78731	0.000193072
Ogfr	1.61309	0.00064489		1700023L04Rik	-1.41723	0.000193097
Gm15506	-1.83428	0.000645053		Rasgef1a	-1.46038	0.000194374
Ifng	3.26669	0.000645062		Acvr2b	-1.27965	0.000195676
Olfr661	2.58533	0.000649235		D2Ertd750e	2.40696	0.000197254
Hpse	1.86386	0.000656799		Phf19	1.56747	0.000197254
Bean1	2.23874	0.00065807		Rassf3	-1.16465	0.000197254
Slc25a22	1.69611	0.00065807		Pycard	2.20853	0.000197254
Avpr1a	-2.26126	0.00065807		Lypd2	-2.77589	0.000197254
Sct	4.04799	0.00065807		Mycbpap	-1.50047	0.000197254
Cdkn1a	2.40069	0.00065807		Asgr1	-1.98593	0.000197254
Colec10	-2.08029	0.00065807		Trim30d	2.8339	0.000197254
H2-Q5	1.71064	0.000662939		Tyms-ps	2.01035	0.000197254
Ociad2	-1.95185	0.000665738		Gfer	1.1949	0.000201183
Zc3hav1	1.58112	0.000670729		9930111J21Rik2	2.1205	0.000201387
Sntn	-2.69587	0.000676713		Mcm6	1.39845	0.000204358
Cat	-1.78131	0.000677233		Sap30	1.76203	0.000206705
Psapl1	1.83756	0.000684355		Ms4a7	4.11005	0.000206705
Bcl3	1.50672	0.000695472		Dck	2.03057	0.000207777
Galnt5	2.55833	0.000716921		Cd207	-2.24733	0.000207777
Fam13a	-1.82138	0.000720334		Cd300a	1.93119	0.000207777
Ifi35	1.82959	0.000720334		2610002D18Rik	2.67941	0.000208539
Scrn1	-1.5448	0.0007299		Fam83d	1.95914	0.000210069
Ifna2	1.70927	0.000731065		Apobec1	1.78915	0.000210069
Ces2e	-2.64308	0.000731065		Gch1	1.70157	0.000210069
Psmb9	1.51836	0.000731065		Mastl	1.96785	0.000210914
Darc	3.08829	0.000731065		Trnp1	-1.24393	0.000213121
Slc6a15	-1.76054	0.000734405		Nav3	1.91034	0.000213121
Gabrp	-2.67031	0.000734405		Bnipl	-1.42033	0.000213394
Cd300a	2.00808	0.000734405		Oip5	1.61313	0.000213394
Gla	2.19535	0.000734405		Susd3	1.21126	0.000213394
Sirpb1b	2.1083	0.000734405		Glt25d2	-1.64944	0.000213394
Slamf8	2.7413	0.000734405		Cenpw	1.74377	0.000213394
Gatm	2.56859	0.000734405		Gpr113	-1.73349	0.000213394
Cdh13	-1.41526	0.000744192		Clspn	1.86183	0.000213394
Cd244	1.94642	0.000745267		Ikbke	1.38657	0.000215126
Gm6484	1.8053	0.000752168		Havcr2	1.74533	0.000215883
Cxcl1	2.58645	0.000752168		Ccl8	3.41647	0.000215883
Irgm1	2.80055	0.000752426		Tmem159	-1.21692	0.000215883
Ephx1	-1.886	0.000757457		Cyp4f15	-4.19715	0.000218317
Lag3	2.45485	0.000775281		Cyp4b1	-1.39555	0.000218317
5430435G22Rik	1.7644	0.000778964		Nfkb2	1.39003	0.000218396
Il13ra1	1.59382	0.000778964		Selenbp1	-1.32385	0.000221249
Pdcd1	2.25139	0.000786173		Ece2	1.31952	0.000225036
Hbegf	1.72999	0.0007877		Tfpi2	1.72572	0.000226972
Aldh6a1	-1.71424	0.0007877		Tnfsf14	1.46263	0.000227667
Sap30	1.6379	0.00080017		Sox11	-1.64116	0.000228369
Rap2b	1.5289	0.00080202		Zmat4	-2.16962	0.000228423
Uba7	1.36772	0.000804254		Irs1	-1.34838	0.000228854
Gp2	-1.94337	0.000804254		Cks1b	1.55936	0.000228995
Lama3	-2.00604	0.000804254		AI426330	-1.22605	0.000228995
Ltbp4	-1.7668	0.000806838		Grb7	-1.63709	0.000228995
Igf2bp2	1.33308	0.000806838		Sfrp1	3.18679	0.000229484
1810010H24Rik	-1.90157	0.00081522		Dnahc10	-2.31025	0.000229484
Orm1	3.05079	0.000816255		Gstm1	-1.42459	0.000229484
Sp100	1.45662	0.000816255		Acss2	-1.22171	0.000229484
Igsf6	1.60138	0.000819423		Tob1	-1.22204	0.000230225
H2-K1	1.55093	0.000821925		Oas2	4.20522	0.000230225
C330020G15Rik	-1.51015	0.00082874		Parp3	1.60914	0.000233501
Arsi	2.02036	0.000839139		Sort1	-1.35927	0.00023439
B930063P07Rik	-1.49819	0.000839139		Gstm3	-1.92705	0.00023439
Dnahc7b	-2.34769	0.000846014		Ctps	1.64038	0.000235243
Gprin3	-2.03486	0.000847478		Serpina3f	4.71726	0.000235243
Maob	-1.48202	0.000847478		Gba	1.23276	0.000235243
Myh7	-2.03246	0.000847917		Ptger4	1.85018	0.000235639
Ifitm6	1.84071	0.000847917		Cmtm8	-1.21862	0.000237241
S100g	-1.78092	0.000847917		Scgb3a1	-6.82801	0.000239267
Psat1	1.93464	0.000847917		Elf5	-1.51576	0.000239683
Sdc3	1.37991	0.000847917		Gm11127	1.7666	0.000239857
Ces1f	-3.8305	0.000849893		Pask	1.82245	0.000240636
D630039A03Rik	-2.01716	0.000855459		Sult1a1	-1.36141	0.000240636
Lgi3	-2.02846	0.000855459		Slfn1	3.18547	0.000240636
Epb4.1l4b	-1.46161	0.000855459		Hist1h2aa	1.14235	0.000240636
Gpr65	2.46785	0.000855459		Acnat1	-1.71044	0.000242428
Mcoln2	2.03299	0.000861292		Mgat3	-2.06939	0.000242428
Creb5	1.73718	0.000861292		H2-Q8	3.25325	0.000242428
Tmem173	1.74909	0.000861956		Troap	1.41244	0.000242428
Zfp593	1.52288	0.000863318		Msr1	3.36392	0.000242428
Snx20	1.69855	0.000869312		Rab27b	-1.19998	0.000242887
Podxl2	-1.47599	0.000869312		Kcnmb4	-1.54143	0.000242887
AW112010	1.74292	0.000869312		Casp8	1.21651	0.000242887
Fmo1	-1.72758	0.000869312		Apol7a	2.30237	0.000243073
Copg2as2	-1.79473	0.000870138		Igsf6	1.42629	0.000244947
Nmi	1.44309	0.000870531		Ccdc109a	1.28305	0.000244947
Lgals1	1.447	0.000871133		6330439K17Rik	-1.91419	0.000245665
1500012F01Rik	1.40751	0.000903834		Sema6a	-1.52686	0.000245665
Tlr6	1.71773	0.000905155		Pfn1	1.29279	0.000245858
2022-03-01	1.52759	0.000905155		Slc15a3	2.32159	0.000245858
H2-M3	1.47767	0.000905155		Ccl12	4.07569	0.000245858
Dppa3	2.44124	0.000910207		Cenph	2.14799	0.000245858
Evi2a	1.82681	0.000914218		Col8a2	-1.26358	0.000245858
Ccdc146	-1.83682	0.000918705		Dpp8	-1.40166	0.000246341
Metrnl	1.51041	0.00092879		Ddx58	1.79273	0.000247035
Serpina3m	2.99758	0.000933431		Dixdc1	-2.40158	0.00024909
Cmtm8	-1.56221	0.000933604		Kifc2	-1.55082	0.00024909
Rasa4	2.35916	0.000933604		1700045I19Rik	-1.50819	0.00024909
5430427O19Rik	1.81261	0.000933604		Cxcl16	1.71513	0.00024909
Cxcl5	2.45799	0.000935682		Tnc	3.12034	0.00024909
9130017N09Rik	2.28537	0.000962902		Aass	-2.04649	0.00024909
Slc2a12	-1.64049	0.000973509		Oas1e	1.6121	0.00024909
Mgat4a	1.59815	0.000973509		Dbf4	1.30228	0.00024909
Olfr1342	1.34654	0.000977625		Cep70	-1.68555	0.00024909
Ces1c	-2.14984	0.000978399		Gm16485	-1.50207	0.00024909
Bmp6	-1.70942	0.000981845		Wnt10a	2.22028	0.000251023
Tmem50b	-1.41197	0.000987331		Rad54b	1.77275	0.000251176
Fcgr2b	1.84721	0.000988909		Fibin	-1.46418	0.000251176
C1ra	1.34431	0.000988909		Chek1	2.05454	0.000253435
Tlr7	2.03193	0.00101826		E130306D19Rik	1.27234	0.00025377
2310002F09Rik	-1.70405	0.00101826		A430084P05Rik	2.36157	0.000255286
Trim69	1.87451	0.00101826		Ifih1	2.07752	0.000256283
D430006K04	1.51762	0.00101826		Afap1l1	-1.13751	0.000256283
Trim30d	2.79443	0.00101836		Spc24	2.0415	0.000257057
Mpeg1	1.73616	0.00101836		Aktip	-1.23312	0.000257057
Tnfaip6	2.4307	0.00103372		Tor3a	1.75357	0.000257852
Olfr1410	1.61448	0.0010452		Rfc5	1.324	0.000258402
Nnmt	1.73241	0.00104538		BC055324	1.61551	0.000259084
Frmpd1	-1.70761	0.00104538		Slc35f3	-1.71882	0.000260079
Lcp2	1.59117	0.001047		Mmp15	-1.47761	0.000260079
Lrrc26	-2.7266	0.001047		Ubd	5.94849	0.000260079
Glb1l2	-1.38748	0.00104739		Ptprb	-1.3252	0.000260079
Apbb1	-1.46474	0.00104739		Spats2l	1.4308	0.000260079
Lilrb3	1.49953	0.00104739		Ccdc146	-1.75722	0.000260079
Tcte1	-2.09676	0.00104739		Smc2	1.42722	0.000260079
Tspan2	-1.73079	0.00104739		Mtus1	-1.18512	0.000260079
2210011C24Rik	-1.7219	0.0010499		Ptx3	2.91879	0.000261235
Ccl8	2.96075	0.0010499		Ccdc129	-3.17978	0.000263679
Gm101	-1.36061	0.0010499		Tox3	-1.69323	0.00026497
Coro2a	1.61299	0.0010553		Naa25	1.39449	0.000269441
Crct1	2.01069	0.00105651		Nuf2	2.60992	0.000269441
Chchd10	-1.57997	0.00106158		Kif14	1.36322	0.000269447
6330439K17Rik	-2.14744	0.00106447		Pdzd2	-1.1959	0.000269817
Prom2	-1.57627	0.00106791		Rsph10b2	-1.66307	0.000270393
H2-Q10	1.42749	0.00106953		Scrn1	-1.08109	0.000270393
A430084P05Rik	2.3585	0.00107026		Arsi	2.13445	0.000270863
Arxes2	-1.38409	0.00107026		D630013G24Rik	-1.97382	0.00027183
Rtp4	2.14983	0.00107554		Plekho2	1.32865	0.00027211
Ddx58	1.55411	0.00107845		Saa4	3.25599	0.00027211
Dixdc1	-2.41955	0.00107845		Prss22	3.07698	0.000272146
Amelx	1.32318	0.00108074		Ung	1.33659	0.000272146
Tmsb15a	1.3478	0.00108074		Ltbp4	-1.81986	0.000272146
Aass	-1.81782	0.00108074		Brip1	1.76827	0.000272146
Cmya5	-1.59414	0.00108074		Areg	3.14646	0.000273864
Gtf2i	-1.29921	0.00108074		Ccdc78	-1.88265	0.000274898
Nmral1	1.74492	0.00108074		Relb	1.21836	0.000274898
Gria1	-1.50517	0.0010881		Plekhh1	-1.10063	0.000274898
Ly9	1.76513	0.0010881		Il13ra1	1.07195	0.000274898
Irf5	1.77665	0.00110273		D630039A03Rik	-1.91139	0.000274898
H2-Q4	1.52425	0.00111531		Calml4	-1.47614	0.00027658
BC013712	1.7902	0.00111635		Depdc1a	2.241	0.000277204
Mlec	1.52664	0.00111953		Kifc5b	2.04032	0.000277204
Mgat3	-2.1378	0.00112161		Chaf1b	2.36411	0.000277204
Scube1	-1.32379	0.00112161		9530083O12Rik	-1.42459	0.000279086
A530032D15Rik	2.03734	0.00112161		Ncaph	1.51462	0.000279196
Trim30a	2.63851	0.00112161		Sectm1a	3.0248	0.000281175
3300002A11Rik	-3.82688	0.00112161		Emp3	1.16757	0.000281175
Cep70	-1.57878	0.00112161		Pkp4	-1.15635	0.000281175
Slc16a6	1.38558	0.00114161		Entpd8	-2.14515	0.000281175
Sbno2	1.24081	0.00114353		Gm15506	-1.7037	0.000281175
Omd	-1.4056	0.00114366		Hck	1.34046	0.000282196
Hmcn1	-1.67416	0.00114635		Gm13111	-1.38853	0.000282511
Gsdmd	1.39702	0.00114635		Zwilch	1.90742	0.000282511
Ak7	-2.58747	0.00114732		Wdr63	-1.76119	0.000282722
Myc	2.21279	0.00114922		A630007B06Rik	-1.05831	0.000282722
Asprv1	1.71365	0.00116118		Arhgef12	-1.14427	0.000282722
Cidec	-2.23243	0.00116327		Wdr96	-2.32362	0.000282722
Dnahc3	-1.59461	0.00116327		Scn3a	-1.32595	0.000282722
Pltp	-1.63703	0.00116327		Slc6a2	-1.33794	0.000282722
Ccdc109a	1.38031	0.00116351		Ace2	-2.14491	0.000282722
Cldn8	-2.60627	0.00116351		Mid1ip1	-1.25526	0.000282722
Cd209f	-2.63041	0.00117529		Mgat4a	1.34276	0.000282722
Dhrs3	-1.28509	0.00118258		Syne2	-1.14979	0.000282722
Lilra6	1.56713	0.00118258		Saa3	7.43285	0.000282722
Lypd6	-1.45425	0.00118645		Gtse1	1.97474	0.000283219
Psmb10	1.24947	0.00118645		Syt12	2.45497	0.000285301
H2-Q7	1.53463	0.00118646		Litaf	1.10857	0.00028602
Lrrc17	-2.04231	0.00121857		H2-Q5	1.69122	0.000286218
Dcaf12l2	1.81214	0.00121857		Rbm33	-1.20999	0.000286218
Olfr382	1.5927	0.00122311		2610318N02Rik	1.60779	0.00028761
Trim30b	1.85228	0.00123529		Gdf1	-1.21508	0.000288412
Gpr155	-1.37087	0.00123653		Pou3f1	4.27004	0.000288412
Krtap17-1	-1.81296	0.00124572		B4galt6	1.15807	0.000288412
Myd88	1.33726	0.00124572		Sgol2	1.74755	0.000288455
Lat2	1.93498	0.00124572		Lin9	1.10282	0.000289307
Socs3	1.72442	0.00124793		Tsc22d3	-1.02192	0.000289636
Tlr3	1.37866	0.00124793		Steap4	2.00117	0.000289636
Slamf7	2.49971	0.00124793		Akap5	-1.54094	0.000289636
Wfdc1	-1.68726	0.00124793		Nmral1	1.83469	0.000289636
Bphl	-1.46868	0.00124969		Ankle1	2.1115	0.000289636
Cxcl3	2.29534	0.00125246		Lmnb1	3.02456	0.000289636
Ccne1	1.63625	0.00125418		Plac8	2.44694	0.000289636
1700001C02Rik	-2.32989	0.00126491		Fancd2	1.4518	0.000289636
Ppfia4	1.57059	0.00126491		Slc44a3	-1.30318	0.000289636
Ncapg2	1.93723	0.00126684		Ang3	-1.05375	0.000290346
Gm11545	-1.57916	0.00127104		Carkd	-1.10993	0.000291584
C230072F16Rik	-1.62725	0.00127504		Mt2	2.38403	0.000291584
Ahr	-1.49529	0.00127504		Kctd8	-1.78999	0.000291584
Epdr1	-1.52293	0.00127984		Arl4c	1.29224	0.000291584
Nrn1	-2.31172	0.00127984		BC057022	-1.46019	0.00029182
Wdr96	-2.14019	0.00127984		Cdc6	1.76474	0.000293691
Trnp1	-1.40285	0.00128494		Aspm	2.32596	0.000293691
Gpr15	1.99666	0.00128494		Kcnn4	1.60928	0.000293691
Ahsp	-2.49703	0.00128494		Zfp704	-1.4714	0.000293691
Igtp	2.64047	0.00128494		Hs3st1	-1.55627	0.000293691
Hydin	-1.88707	0.00129469		Rgnef	-1.5491	0.000293691
Rab6b	-1.60273	0.00129469		Atp2b2	-2.92073	0.000293691
Runx3	1.91664	0.00129812		5430416O09Rik	-1.91591	0.000293691
Chst7	-1.24826	0.00130094		A430071A18Rik	-2.34368	0.000293691
2410066E13Rik	-1.82783	0.00130182		Dsp	-1.05754	0.000293691
Wisp2	1.66967	0.00130182		Scn1a	-1.36107	0.000293691
Cryga	1.35918	0.00130182		Fam126b	-1.1973	0.000293691
Gstm1	-1.36808	0.00130182		Evi2a	1.88911	0.000293691
D630013G24Rik	-2.23593	0.00130182		Ppfia4	2.27668	0.000293691
Mcoln3	-1.38282	0.00130182		Ada	1.3868	0.00029509
Naa25	1.78066	0.00130411		Oas1g	2.50063	0.000295431
Acss1	-1.79348	0.00130706		Snx25	-1.14955	0.000295431
Hmox1	1.27645	0.00130865		Lcn2	2.29119	0.000296285
Tnfrsf11a	1.52427	0.00131142		Fam161b	-1.70302	0.000297464
Ly6c2	1.51865	0.00131142		Eya1	-1.40678	0.000300319
Usp13	-1.39633	0.00131565		Mmp13	1.78434	0.000300319
Stat1	1.72965	0.00131579		Cys1	-1.62961	0.000300705
Egfl6	-1.53175	0.00132071		Casc5	1.78869	0.000300705
5830428M24Rik	-1.24788	0.00132536		Hydin	-1.99025	0.000300705
Amica1	1.47734	0.00132536		Proc	-1.23175	0.000302752
Tmprss13	-1.42981	0.00133108		Epb4.1l4b	-1.20171	0.000305104
Rbp4	-1.46588	0.00133108		Twsg1	-1.18352	0.00030546
Reep6	-1.64327	0.00133301		Ddx60	2.52018	0.00030546
H2-T23	1.48533	0.00134014		Tle2	-1.25291	0.000305488
Prkar2b	-1.23613	0.00135219		Fcgr4	2.73592	0.000306197
Pml	1.29077	0.0013525		Pla1a	4.29884	0.000306197
Kcnn2	-1.94074	0.00135715		Hba-a2	-4.01608	0.000308844
Slc2a6	1.66724	0.00135715		2610021K21Rik	1.29324	0.00031137
Dio2	2.4358	0.00135715		Ccdc164	-1.74789	0.000313078
Kcnmb4	-1.84504	0.0013581		Mre11a	1.19148	0.000313078
Parp3	1.32738	0.00136141		Runx3	1.73717	0.000314147
Batf2	2.68799	0.00136163		Trex1	2.58677	0.000314147
Mapre2	-1.27315	0.00136163		Tcf19	1.928	0.000314147
Retnla	1.7928	0.00138361		Fgfr2	-1.16498	0.000314147
Glp1r	-1.72089	0.00138361		Eme1	1.48881	0.000314147
Cdc14a	-1.29948	0.00138361		Batf3	1.72929	0.000314147
Irf9	1.37561	0.00138361		Ccl4	4.37378	0.000314147
Pclo	-1.84145	0.00138361		Azgp1	-2.12298	0.000314147
Abi3bp	-1.70081	0.00138641		Rprm	-1.38617	0.000315032
Wdr72	-2.13311	0.00138641		5830428M24Rik	-1.58383	0.000317082
Sema6b	1.40591	0.00138641		Acp2	1.16951	0.000319843
Nap1l5	-1.70827	0.00138641		Mapre2	-1.12888	0.000319843
Wif1	-2.65874	0.00138641		Ly86	2.06784	0.000319843
Ypel1	-1.58807	0.00138641		Kif23	1.58785	0.000319843
Osbpl6	-1.61563	0.00138641		Vmac	-1.1191	0.000321455
Litaf	1.21436	0.00138641		Clec14a	-1.89799	0.000322446
Epha2	1.30703	0.00138641		B3gnt4	-2.59762	0.000323014
Tifa	1.4143	0.00138641		Slc11a1	1.96495	0.000323014
Scn1a	-1.69251	0.00138641		Lrrc4	1.59225	0.000323887
Spag16	-2.13988	0.00138641		Nfat5	-1.09628	0.000323887
9230110F15Rik	1.51043	0.00138641		Pgm2l1	-1.57898	0.000323887
Ccrl1	-2.0576	0.00139289		Phf11	3.1208	0.000324346
Pram1	1.24572	0.00139837		Olfr446	1.11257	0.000324346
Lalba	1.83843	0.00139837		D430006K04	1.67556	0.000324346
Gm16499	-1.89117	0.00139852		Acss1	-1.92401	0.000324346
Tspan18	-1.57368	0.00140616		Gpr116	-1.30496	0.000324752
Cxcl16	1.56778	0.0014076		Bex1	-1.91115	0.000324752
Herc6	2.5933	0.00141148		9430079G20Rik	-1.31073	0.000324752
Hba-a2	-1.56183	0.00141222		Apon	1.09222	0.000326383
Aldh1b1	2.27652	0.00141755		Rfc3	1.23937	0.000326838
Lnpep	1.42464	0.00143845		Samd9l	1.74177	0.000326838
Hmga1	1.24989	0.00144824		Rftn2	-1.25538	0.000326838
Ccr2	1.87037	0.00144824		Zfp612	-1.0538	0.000327406
3830431G21Rik	-1.50299	0.00144824		Hoxa5	-1.31976	0.000327406
Ninj2	1.44033	0.00144824		S100g	-1.89403	0.000328031
Aldh4a1	-1.23194	0.00144824		Hba-a1	-4.39696	0.000328116
Tmem132d	-1.52727	0.00145946		Myc	1.83084	0.000328116
Bmpr1b	-1.90279	0.00145946		Ptpn13	-1.07655	0.000329003
Pm20d1	-1.50796	0.00145946		Cyp2a4	-4.95988	0.000329003
Aida	1.36562	0.00145946		Nudcd1	1.14747	0.000329003
Acbd7	-1.83287	0.00146667		Sh3pxd2b	1.2863	0.000333402
1110017D15Rik	-2.00426	0.00146937		Nrm	1.14965	0.000333402
Mmp3	2.04077	0.00147654		Ppap2b	-1.14189	0.000333402
Oas1e	1.51512	0.00148617		Hist1h2ak	1.79587	0.000333402
Sh3gl2	-1.41822	0.00148815		Serpina3n	2.6659	0.000333671
Inhba	2.35044	0.00149577		Samhd1	1.70477	0.000333671
Kcnq1	-1.42777	0.00149577		Procr	1.35222	0.000334145
1700029P11Rik	1.3023	0.00149577		Timeless	1.03057	0.000334914
Tspan4	1.39303	0.00149862		Mcm3	1.0816	0.000336035
Tmem232	-1.81408	0.00150087		Dppa3	2.00735	0.00033685
Klhdc9	-1.95912	0.00150087		9030625A04Rik	1.78893	0.000337107
Ccdc86	1.36646	0.00150793		Ikbkg	-1.53094	0.000337107
Ccdc129	-3.40707	0.00150793		Tyms	1.73479	0.000337107
Pgbd5	-1.40194	0.00150997		Tspan2	-1.65917	0.000337107
Unc93a	2.36669	0.0015209		Gm20272	-1.00295	0.000337107
H2-Q2	1.436	0.00152183		Ptplad1	-1.019	0.000337149
Ush1c	1.21409	0.00153208		Daxx	1.80248	0.000337421
Dck	1.8291	0.00153212		Nr4a1	-2.65116	0.000337421
F2	-1.7374	0.00153212		Hrsp12	-1.15084	0.000337421
Ces1d	-1.72147	0.00153212		Tubb6	1.81226	0.000337421
Irgm2	1.81043	0.00154237		Irf9	1.32735	0.000337421
Mmp19	1.70085	0.00154354		Tgm4	-1.47959	0.000337421
Ankrd37	1.41108	0.00154354		Ncapg2	2.17864	0.000338256
Ncf4	1.46763	0.00154354		Hif1a	1.07277	0.000338418
Arrb2	1.3607	0.00154354		9330101J02Rik	-2.02438	0.000338535
Fhdc1	-1.82458	0.00154354		Gbp3	2.55479	0.000338535
Aim1	1.21294	0.00154354		Hbb-b1	-3.8053	0.000338535
Dusp2	1.67125	0.0015463		Dnahc7a	-1.80885	0.000338535
Ulk1	-1.23447	0.0015463		Cckar	-2.34659	0.00033999
Tbc1d30	-1.61384	0.00154764		Il1r2	2.77858	0.000340173
Zrsr1	-1.2002	0.00155092		4632434I11Rik	1.65868	0.000340173
Cd180	1.6961	0.00155278		Bcl3	1.25007	0.000340173
Guca1b	1.19178	0.00156127		Ogfr	1.48364	0.000340173
Pnpla5	2.09681	0.00156127		Nbea	-1.02735	0.000340173
Asgr1	-1.37119	0.00156998		Aldh1a1	-1.27222	0.000340173
Ly6a	1.44335	0.00157225		Baiap2l1	-1.06128	0.000340173
Ms4a4d	2.53484	0.00158223		Por	-1.56416	0.000340173
Abhd3	-1.72248	0.00158284		Clic6	-1.75646	0.000340173
Spock1	1.44283	0.00158519		Fcer1g	1.83873	0.000344295
Vldlr	-1.13492	0.00159082		Cbx7	-1.31712	0.000344295
Hc	-2.29704	0.00159423		Fam179a	-1.06631	0.000344295
Mrgpra2b	1.60123	0.00159423		Pik3ca	-1.0198	0.000344295
Dok1	1.31383	0.00159755		Tecpr1	-1.0876	0.000344295
2200002D01Rik	1.69977	0.00159995		Tlr6	1.39829	0.000345323
Krt23	-1.20531	0.00160309		Herpud1	-1.0576	0.000345554
Wdr45	-1.30286	0.00160309		Rab6b	-1.98488	0.000345554
Was	1.10852	0.00160309		H2-Q10	1.45412	0.000345554
Klra2	2.08765	0.00160309		E2f8	2.09887	0.000345554
Tnfaip8l2	1.25297	0.00160383		Rgma	-1.11827	0.000345554
Dnahc9	-1.97609	0.00160383		Lcp2	1.60029	0.000345554
Acss2	-1.24539	0.00161322		Plk4	1.19994	0.000345554
Aldh1a1	-1.45455	0.00161322		Pyhin1	3.3841	0.000345554
Mblac2	-1.18629	0.00162414		Cd24a	-1.27272	0.000345554
Parp10	1.30148	0.00162414		Cat	-1.75125	0.000345554
Lst1	2.65948	0.00163361		1700020I14Rik	-1.2093	0.000345554
Gngt2	1.3608	0.00163681		Slfn2	2.16976	0.000345554
Lpcat1	-1.37681	0.00164166		Wdhd1	1.23636	0.000345554
Serpina3g	3.3293	0.00164166		Dnahc11	-1.62841	0.000345554
Trmt61a	1.9198	0.00164166		Tmprss13	-1.57976	0.000345554
5430416O09Rik	-1.37016	0.00164166		Kars	1.0531	0.000345632
Morn1	-1.82686	0.00165503		Herc6	2.1658	0.000345632
Csad	-1.22163	0.00165508		H2-K2	1.57284	0.000346293
Alox5	-1.87198	0.00165508		Stard5	1.27331	0.000348328
Gpr171	1.78487	0.00165875		Pik3r5	1.19944	0.000348328
Wdr93	-1.73202	0.00165875		Thbs3	-1.1657	0.000348328
Sftpb	-1.34713	0.00167111		Chmp4c	-1.09755	0.000348328
Ggct	1.36431	0.00168504		Rasl12	-1.00896	0.000348378
Sgpp2	-2.09289	0.00168504		Tril	-1.39367	0.000349284
2610036A22Rik	1.34261	0.00168824		Tnfrsf1b	1.81735	0.000349522
Rsad2	4.14692	0.00169796		Riiad1	-1.69672	0.000349681
Csf1	1.24847	0.00170115		1190002F15Rik	1.749	0.000352877
Gm13248	1.27473	0.00170125		Etl4	-1.19775	0.000352877
Ly6i	2.02296	0.00170125		Ezh2	1.14584	0.000353509
Kcnk13	1.27189	0.00170459		Fam109a	-1.1357	0.000354601
Xcl1	3.19035	0.00171344		Kif20b	1.47742	0.000354698
Fbxo31	-1.32079	0.00171344		Cldn1	-1.43232	0.000354698
Lmnb1	2.02357	0.00172145		Tbc1d1	1.06677	0.000354698
Gdf15	1.30255	0.00172145		Rasa4	2.38286	0.000354698
Hrsp12	-1.32414	0.00172145		Csl	1.24576	0.000357037
Aldh3a1	-2.10306	0.00172145		Tmem163	-1.22067	0.000358232
Olfr319	2.01667	0.00173379		Sh3bp2	1.70802	0.000358301
Efcab10	-2.20444	0.00173379		Cyp1a1	-4.28468	0.000358301
Adamdec1	-2.03353	0.00173923		H2-T22	1.83796	0.000358684
Gadd45g	1.47599	0.0017418		Wdr66	-1.74303	0.000361023
Rgnef	-1.66709	0.00174255		Ces1d	-1.16199	0.000361142
Cxcl13	5.18622	0.00174255		Lair1	1.96179	0.000361142
Zmynd15	1.40479	0.00174255		Cpsf6	-1.10858	0.000361142
D130043K22Rik	-1.40652	0.00174255		Itpr1	-1.01374	0.000361142
Batf	1.27461	0.00174255		Esco2	1.84155	0.000361142
AK129341	-1.396	0.00174255		1700007K13Rik	-1.66963	0.000361142
Pnma1	-1.3442	0.00174255		Cyp2b13	-1.28633	0.000361736
Gm11627	-1.29936	0.00174255		Map1lc3b	-1.06532	0.000363402
Cd86	1.61276	0.00174255		T2	-2.62061	0.000363402
Pcolce2	-1.9973	0.00174322		Gpr35	1.59976	0.000363402
9330101J02Rik	-2.12407	0.00174322		9230110I02Rik	-1.1443	0.000363665
Clstn3	1.33285	0.00175157		D430042O09Rik	-1.23581	0.000363665
Ly6e	1.09454	0.00176352		Hells	1.67802	0.000367225
Gsta2	-2.45548	0.00176352		Gm5918	-1.32183	0.000367453
Wisp1	1.65741	0.00176408		9130017N09Rik	2.29712	0.000367453
Adcy5	-1.33187	0.00176408		Rad54l	2.26352	0.000367453
Sh3bp2	1.68072	0.00176641		Tinag	-1.7297	0.000367453
Sh3pxd2b	1.35409	0.00176641		Snx22	-1.4338	0.000367475
Fxyd5	1.26346	0.00176641		Wdr69	-1.78087	0.000367475
2310028H24Rik	1.35422	0.00177294		Aph1c	-1.23422	0.000367475
A930018M24Rik	-1.31066	0.00177294		4930451C15Rik	-2.34259	0.000367475
Leprel1	-1.35777	0.00178155		Siglec1	2.62994	0.000367475
Fap	1.22584	0.00178155		Dock9	-1.2725	0.000367475
Abat	-1.57541	0.00178446		Slc6a9	-1.19042	0.000367475
Glp2r	1.10399	0.00179783		Gm14446	3.7213	0.000367475
E330016A19Rik	1.57141	0.00180548		9530003J23Rik	-1.76641	0.000367475
Mme	-1.24982	0.00180548		Iqca	-2.59409	0.000367475
4932415M13Rik	2.64413	0.00180548		Ifi35	1.84087	0.000369937
Wnt6	1.24331	0.00180548		Fam26f	4.04376	0.000369937
Acp2	1.30295	0.00180548		Fam43a	-1.01718	0.00037158
Tspyl4	-1.48098	0.00180548		Parp12	1.88467	0.000372077
Syne2	-1.17597	0.00180617		Lrrc48	-1.82224	0.000372077
Cdkl2	-1.1045	0.00181433		Tff2	-4.93391	0.00037228
Cstb	1.46639	0.0018147		Acbd4	-1.12391	0.000372452
Tbc1d1	1.27402	0.00181633		Mmp14	1.05108	0.000374907
Ogn	-1.4442	0.00182087		Orc1	1.63065	0.000375794
Prss3	1.19178	0.00182087		Ppp1r9a	-1.27602	0.000375898
Glb1l3	-1.79957	0.00182087		Prdx6	-1.18877	0.000376344
Apobec4	-1.24552	0.00182898		Rbp4	-1.80929	0.000376344
Lox	1.17905	0.00182914		Gsta2	-2.67069	0.000379895
Relb	1.48038	0.00183932		2610036A22Rik	1.35625	0.000382851
Clec4e	2.11489	0.00185438		Psmb8	2.30914	0.000382899
Ptpn20	-1.38433	0.00186896		Aox1	-1.20761	0.000382899
Clec4a3	1.72288	0.00186896		C77370	-1.14877	0.000383768
Wnt10b	-1.86531	0.00186896		Inhba	2.31968	0.000383768
Enpep	-1.23089	0.00187392		Btbd17	1.75217	0.000385356
Eya1	-1.56563	0.00188422		Bphl	-1.05649	0.000385356
Stk38l	1.30525	0.00188422		Zdhhc3	-1.00559	0.000385356
Slc5a12	-2.33887	0.00188422		Ms4a4c	3.29672	0.000385356
Gstt3	-1.25935	0.00188595		Hk3	2.67882	0.000386811
Cthrc1	-1.71864	0.00188595		Msi2	-1.24123	0.000387263
Scn3a	-1.58296	0.00188784		Tcstv3	3.20837	0.000387263
Fam69b	-1.20121	0.00188784		Sord	-1.16215	0.000387352
Prss46	2.01965	0.00189786		Igf1	2.51881	0.000387352
Bex4	-1.19075	0.00189786		Krt20	2.47263	0.000387352
Lrrc48	-2.34493	0.00189786		Sppl3	-1.02592	0.00038952
Pprc1	1.16718	0.00189786		Cyp2a5	-5.15687	0.000390045
Acvr2b	-1.51036	0.00189786		Wdr45	-1.04876	0.000390045
Dbpht2	1.48136	0.00189786		1300002K09Rik	2.25484	0.000393134
Olfr103	1.20273	0.00191713		Scn5a	-2.47889	0.000393134
Bcan	-1.81499	0.00191713		Copg2as2	-1.60188	0.000393134
Znfx1	1.69092	0.00192142		Fam193b	-1.12098	0.000393134
Aox1	-1.29757	0.00192142		Thbd	-1.16515	0.000393134
Lgals12	-1.44842	0.00192142		Bmpr1b	-1.79127	0.000393134
C1qa	2.47729	0.00192663		Cdc45	1.66051	0.000393134
Clstn1	-1.31086	0.00192663		Aldh1a7	-1.97169	0.000395527
Pllp	-1.22689	0.0019419		Slc7a5	1.34427	0.000395527
Vpreb3	-2.13634	0.0019419		Lgals3	1.27834	0.000395527
Cpn1	-1.75414	0.00195615		4930579G22Rik	-1.5904	0.000396203
C77370	-1.57551	0.00195933		Reck	-1.09786	0.00039814
Sema3e	-1.41484	0.00196478		Gpr141	1.71925	0.00039814
Slc22a28	1.68111	0.0019699		Mesp1	-2.08259	0.00039814
Tmem212	-2.31919	0.0019699		Ripply3	-1.10931	0.000398549
Olfr56	1.28492	0.0019699		Crebl2	-1.23017	0.000398937
LOC552912	-1.30501	0.0019699		Muc5b	-4.61282	0.000398937
Steap4	1.90999	0.0019699		Cxxc4	-1.42047	0.000398937
Gm5483	1.59259	0.0019699		Lpxn	1.9726	0.000398937
Spdef	-1.34558	0.0019767		Ogn	-1.14766	0.000399084
Plagl1	-1.64011	0.00197966		Trafd1	1.90929	0.000399084
Akr1c6	1.1399	0.00197966		Gprin3	-1.81457	0.000400289
Fcgr3	1.50134	0.00198128		Krt14	2.45827	0.000400289
2210016H18Rik	-1.21322	0.00198503		Ccdc17	-2.10211	0.000403229
Oas1d	2.3575	0.00198503		Pole2	1.12989	0.000403229
Dnahc10	-2.60943	0.00198503		C1qa	3.15711	0.000403229
2610021A01Rik	1.32096	0.0020003		4921507P07Rik	-1.17562	0.000405011
Ank3	-1.64546	0.0020003		Apoc2	1.62906	0.000405041
Twsg1	-1.19371	0.00200445		2010317E24Rik	1.22088	0.000405283
Efhc2	-1.31973	0.00200875		Dnmt1	1.20238	0.000408997
Fbxl13	-1.63706	0.00200875		Klhl24	-1.33572	0.000408997
Pcgf5	1.28977	0.00201701		Espl1	1.8514	0.000408997
Calml4	-1.8672	0.00201701		Gpr65	2.63638	0.000409259
Fbxo36	-1.87671	0.00201701		Npnt	-1.29323	0.000410817
Slc17a5	-1.0638	0.00201701		Igtp	2.78036	0.000411429
Clic6	-2.07345	0.00201701		Fam49b	1.24734	0.000411429
Rasl10b	1.66295	0.00202034		Nampt	1.66027	0.000411429
Procr	1.52805	0.00202296		Znfx1	1.7333	0.000412395
Gm9975	2.39437	0.00202296		Tekt2	-1.51819	0.000412395
C430049B03Rik	-1.53351	0.00202304		Ctss	1.55297	0.000412395
Kctd8	-2.39236	0.00202362		8430408G22Rik	-2.26218	0.000415282
Nfkbie	1.72148	0.00202849		Ces2e	-1.59238	0.000415282
Gins1	1.20496	0.00202901		Vav1	1.72825	0.000415282
Adra1b	1.21851	0.00203131		Ttpa	-1.21716	0.000415303
AI464131	-1.4377	0.00203131		Metrnl	1.12718	0.000415652
Tril	-2.16266	0.00203131		Ccdc25	1.06591	0.000417548
Amot	-1.11786	0.00203131		2210011G09Rik	-1.15709	0.000418872
Scd1	-1.47448	0.00203131		Thrb	-1.23953	0.000419854
Trib1	1.52104	0.00204004		Kpna2	1.14456	0.000419912
Kcnk2	-2.01646	0.00204924		Dnahc3	-1.79637	0.000419912
Aplp2	-1.12665	0.0020528		Cenpi	1.55377	0.000421374
Muc5b	-3.74856	0.00206035		Fabp1	-3.06012	0.000421374
Ak8	-2.1897	0.00206962		Pdss1	1.35443	0.000421374
Spag17	-1.51026	0.00207422		1110020G09Rik	-1.05465	0.000421374
1810008I18Rik	-1.35038	0.00208012		BB283564	-1.06086	0.000422699
Clca3	-5.91886	0.00208371		Smad7	-1.16697	0.00042359
Fmo3	-3.77879	0.00208598		Tacstd2	1.2512	0.000423941
Rnf149	1.16727	0.00210354		Tcirg1	1.56022	0.000424373
Hdac11	-1.41649	0.00210354		C630050I24Rik	1.04228	0.000424729
Bak1	1.8795	0.00212646		Traip	2.02348	0.000425903
Plaur	1.38482	0.00212646		4930556M19Rik	-1.13024	0.000426093
Bmper	1.19277	0.00212646		2900009J20Rik	-1.34087	0.000426859
Kazald1	-1.41895	0.00212646		Esyt3	-1.35871	0.000427101
Ccng2	-1.16667	0.00212703		Ccdc113	-1.68198	0.00042762
P2ry6	1.03926	0.00213429		Tmem212	-2.03908	0.00042762
Slc5a10	1.06361	0.00213429		Atp6v1c2	-1.5575	0.000431398
6430573F11Rik	-1.18748	0.00217151		Pnma1	-1.50151	0.00043358
Angptl2	-1.41226	0.00217206		Pllp	-1.00844	0.000434858
A530064D06Rik	1.66876	0.00217206		Hmgcs2	-2.40845	0.000435073
Tubb3	1.81112	0.00217379		Bub1b	1.19962	0.00043527
Ifih1	2.01011	0.00218534		Il22ra2	-1.47964	0.00043631
Gm1966	2.00343	0.00218534		Hist1h2ai	1.69703	0.00043631
Rgs1	3.15466	0.00218534		Ap2b1	1.20167	0.00043631
Nup50	1.31606	0.00218534		1110017D15Rik	-1.78448	0.00043631
Gzmb	2.55875	0.00219501		Gjb4	1.62877	0.00043631
Dusp10	1.10681	0.0021953		Dmd	-1.05445	0.00043631
Nol12	1.06366	0.0021953		Lat2	1.55135	0.00043631
Il2rb	1.83148	0.0021953		Mad2l1	1.48987	0.000442788
C1qc	2.34604	0.00219634		Rrm2	2.13357	0.00044387
Slfn8	2.81536	0.00220522		C230096K16Rik	-1.16596	0.00044387
Olfr187	1.92223	0.00220675		Slamf9	2.26308	0.00044387
Itpr1	-1.0734	0.00220952		Dynlrb2	-2.01722	0.000443984
Krt84	1.84923	0.00221131		Serpina3g	3.7069	0.000446896
Rftn2	-1.38678	0.00221808		Rarb	-1.08568	0.000446896
Thbd	-1.14822	0.00221808		Prelp	-1.54218	0.000446896
Gm5918	-1.48095	0.00222968		Dusp1	-2.13757	0.000447254
Gm1337	-1.77278	0.0022301		Pkmyt1	1.10054	0.000447991
1700012B09Rik	-2.03966	0.00223234		Fos	-3.00563	0.000447991
Cp	1.05548	0.00223234		Cdc14a	-1.3272	0.000449667
Atp1a3	1.16567	0.00223236		Sp4	-1.18813	0.000451294
Rod1	1.05087	0.00223333		Pon1	-4.33126	0.000451294
Vav1	1.58345	0.00223499		Zrsr1	-1.2764	0.000451294
Fam161b	-1.60328	0.00223932		Rbl1	1.22619	0.000451294
Pank1	-1.20157	0.00224095		Panx1	1.07194	0.000451487
Tmem163	-1.59448	0.00224149		Tsnaxip1	-2.0044	0.000453071
Arx	1.32411	0.00224344		Gm4955	3.22009	0.000454152
1810011O10Rik	-1.05031	0.0022503		Acpp	-1.32618	0.000457178
Csta	1.54207	0.0022503		Apobec4	-1.26384	0.000457178
Slc4a7	2.22464	0.00225099		Rab20	1.0737	0.000458004
Olfr1280	1.54514	0.00226193		Akap14	-2.35812	0.000460121
Gna14	-1.05468	0.00226209		Emb	-1.38957	0.000460168
BC024137	-1.46751	0.00226209		Lst1	2.07218	0.000462707
1700110I01Rik	-1.32476	0.002264		Spa17	-1.30198	0.000464764
Olfr149	1.53581	0.00226617		Kif27	-1.2588	0.000465846
Gpr161	1.10685	0.00226768		Olfr181	1.1055	0.000465846
Efhd2	1.04933	0.00228116		Chtf18	1.80281	0.000465846
Cpm	-1.98719	0.00228298		Gria1	-2.72738	0.00047027
Pbld1	-1.32617	0.00228298		Fgd3	1.0551	0.000470824
Tmem159	-1.11635	0.00228298		Sdc3	1.21987	0.000471425
Hspb9	1.06072	0.00228298		Fam111a	1.02163	0.000471929
Hmga2-ps1	1.41634	0.00229832		BC005764	1.13703	0.00047356
Atp13a4	-1.46469	0.00231393		D630004D15Rik	-1.32164	0.00047356
Fmo5	-1.25183	0.00232046		Ccdc92	-1.05626	0.000474193
3830408C21Rik	-1.12703	0.00232262		H2-Q7	1.50754	0.000475162
Slc11a1	2.01206	0.00232536		Parp9	1.78379	0.000475882
Pnpt1	1.15806	0.00232574		3300002A11Rik	-3.0658	0.0004772
Cd274	3.01658	0.00232574		Hap1	1.24614	0.00047844
Mab21l3	1.20771	0.00232574		Efcab4a	-1.10871	0.000478663
Ppid	-1.05722	0.00232574		Rhbg	-1.40516	0.000478663
Bspry	-1.29852	0.00232574		Pkp1	1.63057	0.000478663
Mut	-1.03861	0.00232638		Ttc18	-2.12963	0.000478663
Nrip3	1.19027	0.00234812		Cdkn1a	1.90186	0.000478663
2900009J20Rik	-1.55722	0.00235841		Kndc1	-1.7177	0.000481246
Mamdc2	-1.81266	0.00235841		Tfcp2l1	-1.51588	0.000483683
Myh14	-1.19381	0.00236062		Aldh3a1	-1.97781	0.000483785
Pcbp3	-1.11929	0.00236062		Psapl1	1.80265	0.00048464
Dse	1.20991	0.00236386		Tbx3	-1.26985	0.000484938
Zmat4	-2.50135	0.00236692		Ppm1l	-1.06415	0.000489952
Ass1	1.13585	0.00236846		Gm10914	-1.44659	0.000490486
Ptrh1	1.15155	0.00236846		Lsm11	1.05611	0.00049074
Ddit3	1.37927	0.00236951		Bmpr2	-1.06968	0.000491207
Mre11a	1.04598	0.00236951		Irf5	1.59277	0.000491207
Gchfr	-1.33766	0.00236951		Slc5a12	-2.60387	0.000491207
Gmpr	-1.09256	0.00236951		Alg8	1.1122	0.000492726
Ppa1	1.75528	0.00236951		Tlr1	1.6447	0.000492726
Cd97	-1.20529	0.00236951		Cxcr7	1.15014	0.000493867
Tmem219	1.12842	0.00237168		Cxcl11	5.76502	0.000495338
Bid	1.4607	0.0023771		5031425E22Rik	-1.16442	0.000497861
Zcchc2	1.07578	0.0023771		H2-Q2	1.4251	0.000497861
Rptn	-1.45442	0.00238099		Zfp663	-1.25074	0.000499437
Tsc2	-1.01408	0.00238169		Dse	1.08638	0.000503725
Vsnl1	-1.07501	0.00238169		Ing3	-1.0981	0.000505517
Soat2	1.31062	0.00238293		Prodh	-1.23036	0.000506236
Fgd3	1.06323	0.00239444		Trim59	1.14928	0.000508086
Slc34a2	-1.60345	0.0024022		Basp1	1.61479	0.000509425
Dnaja4	-1.42931	0.00242223		Gm101	-1.40319	0.000511225
Hk2	1.14565	0.00242223		Odf3b	-1.80836	0.000512518
Aldh1a7	-2.41816	0.00242379		Npr3	-1.46763	0.000512518
Olfr524	1.25488	0.00242532		Cdca7	1.06425	0.000514696
Cxxc4	-1.52352	0.00242985		Slc6a4	-1.25774	0.000515217
Olfr1232	1.39946	0.00243048		Ly6c2	1.25747	0.000515598
Slc4a5	-2.20572	0.0024407		Dnahc9	-1.87112	0.000517938
Gm13152	1.11141	0.00244471		Bmf	-1.505	0.000520197
Wibg	1.52548	0.00245113		Tspyl4	-1.27289	0.000525142
Akap14	-2.47915	0.00245387		Spag16	-1.84124	0.000525456
Tap2	1.54262	0.00245451		4930422G04Rik	1.27859	0.000525456
Rbfox2	1.17505	0.00245922		Glt28d2	-1.03213	0.000525456
Tppp3	-1.95949	0.00246873		4831426I19Rik	1.34842	0.00052819
Expi	2.46051	0.00247335		Tppp3	-1.61086	0.000528474
Tinagl1	1.64625	0.00247968		A930001A20Rik	-2.23294	0.000529611
Arhgap30	1.10838	0.0024847		2700099C18Rik	1.83002	0.000530425
Il28b	2.85015	0.00251636		Cyp2b9	-1.48501	0.00053117
Tmem106b	-1.19276	0.00253044		1700040L02Rik	-1.70684	0.000531228
Megf11	1.24004	0.00253093		Casp4	1.96132	0.000531228
Calml3	-3.92696	0.00253537		Ephx1	-1.45746	0.000531228
Fscn3	1.46965	0.00253616		Clmn	-1.33008	0.000531668
Parp14	1.40761	0.00253616		1700049E17Rik1	-1.05992	0.000531853
Abcc9	-1.16217	0.00253616		Dnajc28	-1.02757	0.000533383
Trim15	1.51437	0.0025387		Abhd14b	-1.00055	0.000533383
Ccl9	1.59738	0.00254018		Cenpv	-1.03186	0.00053369
Ctsz	1.07413	0.00254499		Mmp12	2.1669	0.000534483
Pdyn	2.93149	0.00254499		Mlec	1.78355	0.000534652
Tmem64	-1.2519	0.00254499		Zfp593	1.08079	0.000537916
5330417C22Rik	-2.256	0.00254736		Kazald1	-1.22729	0.000538453
Cd52	1.33958	0.00255737		Dnmt3l	1.40623	0.000538587
Gm13157	1.10877	0.00256132		Cd276	1.14213	0.000539287
Hist1h2be	-1.17736	0.00256132		Mdk	1.05238	0.000539287
Arl3	-1.33925	0.00256157		Ak2	1.31134	0.000539287
Emp3	1.03218	0.00256157		Sirpb1b	1.64547	0.000539334
Cadm1	-1.4277	0.00256217		Mamdc2	-1.22583	0.000539897
Prrc1	1.23375	0.00256217		Diap3	1.49658	0.000542852
Lrrc6	-1.6445	0.00256217		Cdh3	1.5299	0.000542852
Cyp46a1	1.93642	0.00256217		Oas1d	2.49033	0.000542852
Olfr1131	1.75106	0.002565		Gbp6	3.10223	0.000543423
Psme1	1.28274	0.002565		Purg	-1.03907	0.000543432
Mafb	2.13502	0.002565		Lrat	-2.33826	0.000545089
Cyp2a22	-2.68793	0.002565		Htt	1.08138	0.000545677
D830031N03Rik	-1.17204	0.002565		Mms22l	1.49425	0.000545677
Rabgap1l	-1.11534	0.002565		3000002C10Rik	1.00376	0.000545874
Clca1	3.07209	0.00257782		Slc25a22	1.60919	0.000546024
Il10ra	2.10293	0.00258541		Gm13248	1.22986	0.000546024
Ptgfr	-1.2071	0.00259645		Ttk	1.83831	0.000546024
Tap1	2.14263	0.00260068		Sp100	1.33306	0.000546024
Sec14l3	-1.46245	0.00260236		Srm	1.36692	0.000546024
Nkg7	1.11823	0.00260236		Lyzl4	-1.02878	0.000547791
Emb	-1.66678	0.00260643		Ttc29	-1.70264	0.000547791
Tapbp	1.60473	0.00261532		Tgm1	2.22563	0.000549116
Nr4a2	-1.91571	0.00261737		H2-D4	1.96458	0.000549214
Vmac	-1.04519	0.00261961		Mapk1ip1	-1.21777	0.000549214
Sdc4	1.01868	0.00262606		9530051G07Rik	-1.07338	0.000549214
5430401F13Rik	1.03681	0.00263395		Dcxr	-1.25319	0.000551659
Evi2b	1.33256	0.00263421		A530028O18	-1.25514	0.000552286
Nlrc5	1.89875	0.00264478		Ercc6l	2.17471	0.00055229
Tnip3	1.74186	0.00264528		2610015P09Rik	-1.14484	0.00055229
Upk3a	-1.94501	0.00264528		Tnfaip8l2	1.447	0.000552543
Acot1	-1.99878	0.00264757		Dsn1	1.18749	0.000556703
Zc3h12d	1.46184	0.00264806		Plvap	-1.11114	0.000557251
1700017B05Rik	1.0988	0.00264806		Ednrb	-1.23213	0.00055735
Sult1d1	-3.70818	0.00265787		Slco2b1	-1.39393	0.000559315
5730559C18Rik	1.06346	0.00265787		S100a14	2.99419	0.000559315
Unc79	-2.72026	0.00267686		Ak8	-1.88683	0.000560119
Ripk3	1.44924	0.00267686		Apitd1	2.17509	0.000561273
Angptl3	1.04414	0.00267761		Inmt	-1.55102	0.000561273
AU021034	-1.85032	0.00267838		Apod	3.7585	0.000561273
Fndc1	-1.23355	0.00268174		Apol9a	4.29542	0.000561882
Ptpro	1.4375	0.00268781		9030607L20Rik	1.08049	0.000562065
Tmem220	-1.30717	0.00271017		Nmt1	1.07883	0.000562963
Gprasp1	-1.40121	0.00271017		Kcnip4	-1.83191	0.000562963
Gstm3	-1.70201	0.00271017		Negr1	-1.18541	0.000563547
Plekhb1	-1.59695	0.00272932		Fmo5	-1.00894	0.00056358
Srrm4	2.13674	0.00274099		Tmem106b	-1.07909	0.000563866
Bpifb5	-1.86255	0.00275489		Coro2a	1.7244	0.000563887
Cldn1	-1.60086	0.00276306		B230303O12Rik	-1.15033	0.000563887
Slc19a3	-1.15836	0.00277586		Akd1	-1.7561	0.000563887
Hcls1	1.39878	0.00277784		Tmem38b	1.13649	0.000563887
Ada	1.21235	0.00277784		C1rb	1.52749	0.0005641
Adat3	1.10377	0.00279042		Atad5	1.04126	0.000565241
H2-D1	1.41397	0.00279042		Nlrc5	2.00912	0.000565341
Gsta3	-1.28005	0.00279159		Cd80	1.30037	0.000565341
Pmaip1	1.03858	0.00280137		Spata17	-1.45243	0.000565624
Pign	1.09327	0.00280195		Tspan18	-1.35752	0.000565809
E130006N16Rik	-1.251	0.00280763		Pdia2	-1.3589	0.000565809
Ece2	1.3036	0.00284173		Mitd1	1.67855	0.000566548
Ttc29	-2.38438	0.00284173		Ccbl1	-1.15347	0.000566548
Tpx2	1.69226	0.00284173		Arf4	1.04191	0.000566548
BC100530	1.57234	0.00284173		Slc23a1	-1.7737	0.000570226
Prps2	-1.25712	0.00284824		Creb5	1.44018	0.000571084
Rin1	1.63209	0.00285294		Hexb	1.00845	0.000571804
Max	1.1638	0.00285294		Ncf2	1.13744	0.000571804
Ebi3	1.01547	0.00287094		Ttll6	-1.5284	0.00057273
Rgs3	-1.45849	0.00287521		Sp110	1.66425	0.000574236
0610009L18Rik	-1.20484	0.00288625		Deptor	-1.11422	0.000575047
Armc4	-1.55019	0.00288625		Colq	-1.7396	0.000575885
Ces2b	-1.97377	0.00288625		Rb1cc1	-1.13698	0.000576837
Tox3	-1.1958	0.00288625		Ccdc108	-2.22924	0.000576837
Zfp536	1.39125	0.00288777		Wdr65	-1.98291	0.000576837
Tgtp1	2.49432	0.00290332		Stat1	1.85371	0.00057712
4930432J09Rik	1.10656	0.00290535		Polq	1.33266	0.000577285
Sdpr	-1.11026	0.00290763		Abi3bp	-1.50225	0.000578038
Gdap1l1	1.12573	0.00291097		Txlng	-1.05353	0.000579497
Pdgfd	-1.27587	0.00291097		Rab5c	1.1364	0.000579497
Mlc1	-1.06279	0.00291097		Gsdmd	1.12322	0.000583604
Sh3bgr	-1.40515	0.00292091		Pcgf5	1.10296	0.000587579
Prodh	-1.22117	0.00292384		Hc	-1.89797	0.000589614
Gbp2	2.47766	0.00292917		Tmie	-1.02703	0.00058968
Ctsb	1.05297	0.00292917		Thra	-1.15508	0.000591535
Aox3	-2.78016	0.00293097		Slamf8	2.91339	0.000591535
1810027L02Rik	1.2964	0.00293106		Foxa1	-1.48301	0.000596161
Mlf1	-1.50649	0.00293106		1110038B12Rik	1.29341	0.000598919
Map1lc3b	-1.27661	0.00293106		Fam47e	-1.48667	0.000602126
Sspn	-1.10908	0.00293967		Tnfrsf12a	1.83653	0.000603928
Tmem100	-1.38664	0.00296184		Tmem132d	-1.36457	0.000607122
Fbxl7	-1.05524	0.00296184		Stk33	-1.77128	0.000607122
Ttbk1	1.00974	0.00296184		Parp10	1.23412	0.000607122
Nt5c3	1.53312	0.00297279		Ly6c1	1.17915	0.000607122
Tcirg1	1.5861	0.00300697		AK129341	-1.20845	0.00060958
Narf	-1.05103	0.00301052		BC024137	-1.50826	0.000610662
Arxes1	-1.16839	0.00302351		Upk2	-2.0087	0.000610662
Alox5ap	1.20831	0.0030394		Jak2	1.10837	0.000610662
Htt	1.13231	0.00304329		Ly6e	1.04529	0.000610662
4930578N16Rik	-1.02582	0.00305038		Rapgefl1	-1.73598	0.000618458
A430107O13Rik	-1.28437	0.00305291		Igfbp3	-2.65077	0.000619391
Iqch	-1.50618	0.00305291		Dbndd1	-1.78716	0.000619391
Mapk1ip1	-1.07349	0.00305885		E2f1	1.25903	0.000619391
Clec2g	1.03092	0.00307588		Btk	1.24584	0.000619391
Abcd3	-1.08963	0.00307588		Pbp2	1.62017	0.000619391
1110002B05Rik	-1.07889	0.00307962		Gbp5	3.09553	0.000620285
Srm	1.14229	0.00308222		D930048N14Rik	-1.24137	0.000621555
Gprasp2	-2.10373	0.00308254		1810012P15Rik	-1.15071	0.000624729
Cib2	-1.03937	0.00308402		Tcte1	-1.63749	0.000625009
Gzmk	1.33283	0.00308463		Nmi	1.44432	0.000631784
Mmp13	2.07761	0.00309293		Fam92b	-2.64536	0.000632549
1700122O11Rik	1.17828	0.00309664		Mdh1b	-1.62453	0.000633356
2610318N02Rik	1.195	0.00309664		Pnp	1.37058	0.000637482
D17H6S56E-5	1.28963	0.00309846		H2-D1	1.47925	0.000640921
Dnajc28	-1.30079	0.00309846		Sntn	-1.87533	0.000640921
Ifi27l1	-1.30652	0.00310326		Crbn	-1.08948	0.000640921
Akd1	-1.77679	0.0031077		Rwdd3	-1.08471	0.000644315
Dio3	1.88943	0.0031077		Abhd3	-1.14703	0.000644315
Ceacam19	2.00285	0.00312561		H2-T23	1.4488	0.000646381
Ikbke	1.37631	0.00312968		Ccl1	1.97273	0.000646471
Tmcc3	-1.14405	0.00313409		Cpm	-1.20054	0.000647672
Mpp7	-1.02016	0.00313409		Gsta4	-1.14717	0.000652195
Cbr2	-1.64436	0.00313409		C430049B03Rik	-1.08894	0.000653686
Lrrn3	-1.34247	0.00314027		Ctsf	-1.28468	0.000653686
Wdr66	-1.83356	0.00315204		G0s2	-1.4886	0.000655568
H2-D4	1.65797	0.00315204		Rgs11	-1.18339	0.000656967
Trf	-1.13852	0.00316014		Il1rn	2.75652	0.000656967
D230025D16Rik	-1.13973	0.00316014		Prickle1	-1.14066	0.000658458
Pabpc4l	-1.31494	0.00317851		Dnahc2	-2.29338	0.000660053
Tbx1	-1.65777	0.00318182		Stil	1.37475	0.000664208
St6galnac2	-1.46584	0.00318182		Il6	3.37168	0.000664208
Gm4951	1.96743	0.00320009		Lhx2	3.1934	0.000667851
Slc32a1	1.07543	0.00320834		Camsap3	-1.01847	0.000670863
Klra12	1.10225	0.00320834		Cenpa	1.34868	0.000671298
Slc23a1	-1.84232	0.00320834		Tubb4a	1.40004	0.000671298
Pik3r5	1.21947	0.00321728		9930023K05Rik	3.23795	0.000677006
Lnx1	-1.41914	0.00322751		Wif1	-1.93902	0.000679606
4921507P07Rik	-1.47115	0.00323908		Csf3	1.44933	0.000679606
Dpp8	-1.22576	0.00323908		Cyp2a22	-3.31203	0.000681253
1700026D08Rik	-2.23379	0.00323908		Pmf1	1.17688	0.000681495
Rab36	-1.60282	0.00323908		Plaur	1.32339	0.000686397
Lrrc34	-1.78726	0.00323908		Ntrk1	1.02964	0.000688666
Tmeff2	-1.1593	0.00323908		9930014A18Rik	-1.24054	0.000689474
F10	1.28303	0.00324591		Mblac2	-1.11962	0.000692475
Veph1	-1.43023	0.00325067		2310068C19Rik	-1.00868	0.000695993
Scgb3a2	-3.73031	0.00325067		Micalcl	-1.13265	0.000698736
Cd40	1.11481	0.00325067		Vcam1	1.31813	0.000698736
Dmd	-1.06113	0.00326782		Mcm2	1.40217	0.000699197
Gm17434	1.24734	0.00327863		1700026D08Rik	-1.78492	0.000699791
Ntn4	-1.59374	0.00327863		U2af1	1.07651	0.000699791
Vstm2a	-1.44558	0.00328139		Socs1	2.40112	0.000702386
Exo1	1.14151	0.00328514		Ceacam19	1.59929	0.000702386
Clec4a2	1.46682	0.00328817		Casc1	-1.29275	0.000705599
Lgals9	1.80925	0.00328817		Zdhhc1	-1.3801	0.00070582
Col4a4	-1.16116	0.00330102		Plk5	-2.4534	0.00070824
C230035I16Rik	-1.63443	0.00330102		Gdpd1	-1.05809	0.00070824
Spa17	-1.38435	0.00330417		Samsn1	1.26456	0.00070824
Dbc1	1.09971	0.00330989		Sox13	-1.16618	0.000710986
Ccdc113	-1.60866	0.00331031		Arhgap8	1.08344	0.000710986
Calcoco1	-1.34291	0.00331779		Gtsf1	1.72563	0.000712811
Crtam	2.02439	0.00332251		Ttll13	-1.24902	0.000714211
Gm11938	1.20529	0.00332251		Cyp2f2	-3.28584	0.000717253
Trim25	1.13073	0.00332251		Tbx6	-1.31796	0.000717253
Psd3	-1.13892	0.00332251		Zfp667	-1.00906	0.000717253
AF251705	1.42717	0.00333365		Trmt61a	1.37806	0.000717253
Slc16a1	1.26263	0.00333365		Rgs9	-1.28967	0.000717253
Hba-a1	-1.80041	0.00333644		Scgb1a1	-2.22507	0.000717782
Prss33	1.24192	0.00333644		Vpreb3	-2.42762	0.000719464
Pcmtd2	-1.22709	0.00333644		Lrrc50	-1.92458	0.000719464
Degs2	-1.84556	0.00333644		Mpeg1	1.58328	0.000720242
Ly6c1	1.91545	0.00335338		Tlr7	1.85353	0.000720242
1700012L04Rik	1.13269	0.0033574		5530402H23Rik	-1.02269	0.000720481
Hey1	-1.39473	0.00336557		Il10ra	1.81398	0.000720481
Tppp	-1.24581	0.00338976		Rnf144a	-1.1461	0.000721308
Ifna5	1.29184	0.00338976		Fbxo31	-1.3929	0.000721308
Cldn22	-2.37466	0.00339026		H2-K1	1.36451	0.000723193
Igf1	1.87419	0.00339026		Cabp4	1.63595	0.000723625
Irs1	-1.32273	0.00339707		Ctsz	1.24148	0.000726067
Ccdc164	-1.31376	0.00340211		Hist1h2ab	1.83562	0.000726067
Myo1b	-1.0475	0.00340812		B930063P07Rik	-1.28151	0.000726067
Mc4r	1.30298	0.00341682		Amica1	1.85139	0.000726093
4930451C15Rik	-3.18208	0.00343472		Nup50	1.29521	0.000731118
Slc29a3	1.17215	0.00343581		Mllt6	-1.02851	0.000731223
Abcg5	-1.56171	0.00344007		Gnmt	-1.23839	0.000732581
Prkcdbp	1.07941	0.00344384		Endog	-1.07403	0.000732581
Sox7	-1.10838	0.00344791		Bex2	-1.8237	0.000732581
Itga5	1.16488	0.00344801		Pcolce2	-1.91643	0.000732581
Fscn1	1.40845	0.00344801		Tnip3	1.56901	0.000733068
Rsph4a	-2.0006	0.00345911		D630045J12Rik	-1.08998	0.000734836
Zfp663	-1.15462	0.00350523		Prr18	-1.03815	0.000734836
C1qb	2.40613	0.00350523		Hist1h1d	1.11048	0.000735867
C2cd4a	1.18103	0.00350523		Gchfr	-1.13067	0.000735867
Rnf31	1.04508	0.00350523		E030010A14Rik	1.77419	0.000737065
Edil3	-1.06038	0.00350523		Evi2b	1.31114	0.000737206
4930488B01Rik	1.34561	0.00350523		1700029J07Rik	-1.40628	0.000738298
Alas1	-1.15991	0.00350523		Acrbp	-1.06461	0.000738298
Gmppb	1.12418	0.00350523		Sorbs1	-1.11538	0.000738437
Upk2	-1.40827	0.00350523		Ube2c	2.42404	0.000738437
Ptplad1	-1.03939	0.00350523		Gabarapl1	-1.03552	0.000740304
Tnfsf8	1.45896	0.00350523		Enpep	-1.06001	0.000740304
H2-Bl	2.11243	0.00350523		Tgtp1	2.70232	0.000740304
Has2	1.71922	0.00350523		Myo5c	-1.46163	0.000741119
Adk	-1.03357	0.00350523		Mfsd6l	-1.14592	0.00074173
E130120C16Rik	-1.66464	0.00350659		Rrp12	1.11562	0.000751775
A530028O18	-1.02356	0.00350659		Syce2	1.52729	0.000751775
D630045J12Rik	-1.08138	0.00350659		C1qb	2.81067	0.000753222
Cst7	1.58959	0.00350659		Zc3hav1	1.39177	0.000756042
Gabarapl1	-1.02675	0.00350659		Ccdc28a	-1.01154	0.000756042
Spns2	-1.06171	0.00350659		Atp2c2	-1.18809	0.000756391
Pdk1	-1.23057	0.00350976		Ldhb	-1.5395	0.000756907
Cytl1	-1.31819	0.00351432		Cdh16	-2.2988	0.000760698
Vmn2r89	1.0943	0.00351432		2010007H06Rik	-1.4895	0.000760698
Gbp9	1.7363	0.00351972		Rdh5	-1.00009	0.000761728
Tor1aip1	1.12193	0.00352229		Ccdc81	-1.72547	0.000763424
Wdr38	-1.42554	0.00352403		Styxl1	-1.13957	0.000763424
2900006K08Rik	-1.80957	0.00352403		Kcnn2	-1.4417	0.000763424
Ubxn10	-1.20261	0.00354364		Racgap1	2.09047	0.000763424
Scn5a	-2.33187	0.00356287		Aldh1b1	2.48675	0.000763424
Hbp1	-1.09503	0.0035729		Lrrc25	2.66982	0.000764887
Cxcl15	-1.09987	0.00357826		Cldn10	-2.10987	0.000775272
Pde8b	-1.26394	0.00357972		2610528J11Rik	-1.10482	0.000779788
Rab27b	-1.08999	0.00358038		Psmb10	1.02193	0.000779788
Dcdc2a	-1.10167	0.00358038		Slc16a11	-2.6871	0.000779788
Pdcd1lg2	1.26191	0.00359724		Gpnmb	2.32269	0.000780832
Ifi47	2.06656	0.00359969		Sdsl	1.46065	0.000780832
Pla2g7	2.55686	0.00360996		Gpld1	-1.09599	0.000780832
Nop58	1.107	0.00361179		Tmem35	-1.3161	0.000780832
Ptger4	1.67402	0.00362695		Cldn8	-2.10439	0.000782912
Tnfrsf12a	2.0105	0.00362695		Glod5	1.73292	0.000785197
Pvrl3	-1.18851	0.00362695		Fgr	1.04001	0.000786171
Cd300e	1.04794	0.00363016		Hcls1	1.25668	0.000790442
Ptges	1.57986	0.00363016		D430020J02Rik	1.05671	0.000791658
Bnipl	-1.27611	0.00363016		Mtap2	1.03199	0.000792127
Lta	1.67712	0.00363016		Slco4c1	-1.52863	0.000792746
Klk1	1.66659	0.00363016		2310043J07Rik	1.81072	0.000795724
Radil	-1.28558	0.00363016		Sema6b	1.0139	0.000796338
G0s2	-1.44132	0.00363016		Btg2	-1.90006	0.000797617
Pkm2	1.00309	0.00363016		Sec14l2	-1.1559	0.000801466
Amigo3	1.11365	0.00363016		Fyb	1.60611	0.000803546
Adamts3	1.3912	0.00365566		Gemin6	1.12772	0.000803546
Sesn3	-1.03835	0.0036675		Pign	1.06644	0.000803711
Aph1c	-1.45847	0.00367062		Tcp11l2	-1.0988	0.000804739
Cys1	-1.05571	0.00367062		Cdc25c	2.05495	0.000805311
Slc26a4	1.49985	0.00367062		Adamdec1	-1.94843	0.000805311
Dram1	-1.10513	0.00367209		Gbp2	2.2814	0.000805417
Homer2	-1.35398	0.00367209		Pm20d1	-1.21817	0.00080679
1700007K13Rik	-2.00947	0.00367209		Wdr78	-1.0104	0.000806897
4930455F23Rik	-1.21347	0.00367834		Gsta1	-2.27382	0.000811829
9130014G24Rik	-1.6258	0.00369032		Igfbp6	-1.62684	0.000814405
Fabp5	-1.24604	0.00370925		Gca	1.23957	0.000814405
1700123I01Rik	1.49033	0.00373783		Slc26a4	2.70424	0.000814405
Sytl2	-1.20109	0.00374112		Lama1	1.58376	0.000814629
Etv4	1.04635	0.00374112		Prkcdbp	1.03602	0.000815403
Ceacam20	1.18809	0.00374843		Mab21l3	1.11412	0.000815439
Fgr	1.42657	0.00374843		Dut	1.07313	0.000815439
Etl4	-1.21304	0.00375149		Epsti1	2.68077	0.000815484
Mcee	-1.01667	0.00375318		Cacna1b	-1.15192	0.000816083
Shisa2	-2.07056	0.00375414		1700001C02Rik	-2.26694	0.000817636
Thrb	-1.47912	0.00375414		Fam3b	1.13011	0.00081827
Bcl6b	1.13485	0.00376481		Ulk2	-1.23143	0.000822915
1700040L02Rik	-2.1	0.00377206		Rian	1.45486	0.000825971
Por	-1.26368	0.00377613		9530091C08Rik	-1.09363	0.000826399
Tmem174	1.18322	0.00377613		6230424C14Rik	-1.35199	0.000828045
Olfr1196	1.64353	0.00380278		Spag6	-1.49054	0.000832928
Pih1d2	-1.24642	0.00381565		Ntf3	-1.38605	0.000841298
Ankrd1	1.75148	0.00381651		Tcstv1	2.71836	0.000843902
Sgsh	-1.20923	0.00383928		2610035D17Rik	-1.16511	0.000846246
Gm11428	2.05759	0.00385433		Ifi30	1.29654	0.000846246
Mrgprg	1.78414	0.00386498		Cstb	1.40365	0.000846246
Csdc2	-1.2858	0.00386846		Muc20	-1.17391	0.000847922
Fez1	-1.34193	0.00387066		Hbegf	1.59468	0.000847922
D430036J16Rik	-1.59919	0.00387578		Hpse	1.94112	0.000848316
Scd2	-1.19415	0.00387578		Mgst1	-1.08095	0.00084855
Msc	-1.0883	0.00388403		H2-Q4	1.39056	0.00084855
Hck	1.12263	0.00388673		Aldh4a1	-1.0377	0.00085227
Rhoc	1.16841	0.00389347		Serpina3j	1.89164	0.00085227
Igfbp6	-1.06495	0.0038976		Slc34a2	-1.29983	0.00085227
Lypd2	-1.91792	0.00390916		Wdr72	-1.76426	0.00085603
Arl4c	1.07606	0.00390916		Lpcat2	1.1741	0.00085886
Riiad1	-1.83476	0.00390916		Gm4340	1.12407	0.000861139
Il21r	1.55465	0.00390916		Prim1	1.06787	0.000861793
Cd69	1.71266	0.00390916		Gm1337	-1.82556	0.000862407
Plk5	-2.77072	0.00394748		Ang	-1.12261	0.000865706
Ces1g	-1.69012	0.00395424		5730590G19Rik	1.41407	0.000865758
Btbd17	1.83271	0.00395821		Cytl1	-2.28893	0.000868468
Crlf1	-1.22337	0.00397904		Gabarapl2	-1.07175	0.000869034
Tob1	-1.1138	0.00397904		Ces2b	-1.07622	0.000869879
Pgm2l1	-1.4298	0.00397904		Pdk1	-1.3472	0.000869879
Dynlrb2	-2.33288	0.00397904		Prm1	2.41645	0.000870796
Mal2	-1.13336	0.00397904		Dbc1	1.78089	0.000870796
S100a6	1.37509	0.00397904		Shisa4	1.04954	0.000874329
8430408G22Rik	-1.68563	0.00397904		Tapbpl	1.1505	0.000875463
Masp1	1.07561	0.00397904		2010300C02Rik	-1.26609	0.000875463
Pcsk5	1.04259	0.00398164		Ly6a	1.15904	0.000876874
Tpd52l1	-1.46991	0.00398859		Myo1f	1.21308	0.000877161
B830017H08Rik	1.12713	0.00401177		H60c	-1.31643	0.000879457
Kng1	1.14501	0.00401177		8430416G17Rik	-1.01264	0.000879457
Npy1r	-1.16306	0.00401177		1700123K08Rik	-1.0722	0.000879546
Sf3a2	1.05028	0.00401177		Arhgef4	-1.12166	0.000880622
Col24a1	2.94797	0.00401177		Cyp4f18	1.71208	0.000882234
9530003J23Rik	-1.8332	0.00402581		Tppp	-1.23144	0.000882234
Macrod1	-1.26076	0.00403388		Serpinb5	3.4507	0.000882941
Hs6st2	-1.55695	0.00403491		2200002D01Rik	1.48818	0.000885345
Ttll3	-1.61909	0.00403491		Parp11	1.57951	0.00088672
Olfr786	1.56589	0.00403491		Pcdhac2	-1.49648	0.000887476
Klra15	1.14728	0.00404399		Clca4	1.25461	0.000888023
Cyp1a1	-3.73013	0.00404399		Poc1a	1.02934	0.000892616
Ccdc153	-2.30898	0.00404399		Aida	1.24831	0.000893897
Bcl2a1b	1.13938	0.00404562		Vstm2a	-1.09602	0.000898096
Mb	-3.18389	0.00405563		Akr1b7	-1.15239	0.000898457
Gpr34	-1.70939	0.00405908		Nod2	1.19019	0.000903914
Stfa1	1.56943	0.00405908		Aldh6a1	-1.71604	0.000908547
Tspo	1.0762	0.00406443		Prok2	1.03071	0.000913315
Olfr1393	1.21051	0.00406443		Nusap1	2.0207	0.000917921
Cckar	-2.22425	0.00406443		Slc39a14	1.45625	0.000917921
Gast	1.42276	0.00406443		Degs2	-1.67504	0.000918625
Fgfr2	-1.12827	0.00406968		9230104K21Rik	-1.2003	0.000923557
Alb	-1.62515	0.00407134		Lrrc59	1.06879	0.000929649
Fosl2	1.09902	0.00409279		Ccdc80	1.38715	0.000930909
Ccdc60	-1.28975	0.00410324		Krt18	1.26615	0.000931496
Fam49b	1.09032	0.00410324		Cyba	1.03148	0.000933138
Prdm16	-1.38972	0.00410504		Fmo3	-4.96154	0.000933138
Gpha2	1.13552	0.0041147		D430036J16Rik	-1.34343	0.000933138
Casp8	1.02884	0.00412396		Cd109	1.52603	0.000934952
Cbr3	-1.04723	0.00413278		Gzmb	3.46482	0.000935567
H2-M10.2	2.81499	0.00414501		E130006N16Rik	-1.19145	0.000938203
Olfr195	1.21874	0.0041453		LOC552912	-1.04879	0.000940324
Mccc2	-1.27662	0.00414784		1110035H17Rik	-1.29452	0.000940324
Nts	1.87768	0.00414784		Cpxm1	1.38762	0.000944049
Txlng	-1.06295	0.00414784		Pcmtd2	-1.18838	0.000945549
Samsn1	1.308	0.00414868		Dcdc2a	-1.30739	0.000946652
Cyp2a5	-4.15259	0.00414868		Nr1i2	-1.29467	0.000947554
Alyref2	1.05424	0.00414868		Cd300ld	1.12924	0.000948776
Prom1	-1.73274	0.00418203		Galntl2	-1.68638	0.000948776
Gm12185	1.54157	0.00418203		Ccng2	-1.10692	0.000948776
Slco2b1	-1.41619	0.00418203		Zfp641	-1.12326	0.000950868
Rassf3	-1.04669	0.00418203		Myd88	1.03652	0.000953579
Glt1d1	1.04523	0.00418637		Fam82a1	-1.14488	0.000954277
Mzf1	-1.52269	0.00418701		Gm12250	2.73246	0.000954277
Arhgef4	-1.56419	0.00419468		Akr1b8	1.13431	0.000954277
Ctsf	-1.38035	0.00419468		Abca5	-1.07711	0.000955389
Insr	-1.06373	0.00419468		Etv4	1.63146	0.000955389
Irf8	1.08842	0.00420605		Uba7	1.09833	0.000956321
Sox9	1.81866	0.00420605		Tbx1	-1.83433	0.000960392
Gca	1.27865	0.00420605		Ccrl1	-1.75743	0.000961932
1700025K23Rik	-1.14472	0.00420815		Hilpda	-1.10601	0.000961932
1500009L16Rik	1.06304	0.00421255		Cd244	1.47783	0.000961932
Ttpa	-1.23118	0.00422655		Fasn	-1.21987	0.000961932
Ces1e	-2.73294	0.00423981		Cx3cr1	1.38709	0.000962626
Acvrl1	-1.23625	0.00424062		Dctpp1	1.02373	0.000964094
Dll1	1.84399	0.00424657		Cyp2b10	-1.22365	0.000964094
Fsd2	-1.3382	0.00424657		Rtdr1	-1.874	0.000964138
Fgfr3	-1.07825	0.00425483		Rbm3	1.23941	0.000964138
Slc16a12	-1.37085	0.00425483		Appl2	-1.12647	0.000966917
2010007H06Rik	-1.4604	0.00425555		9530026P05Rik	-1.01277	0.000968107
Lrrc2	-1.30852	0.00425555		Cyp4v3	-1.13092	0.000971976
1700084M14Rik	1.2105	0.00426537		Clec4a2	1.44515	0.000977148
Tmem86a	1.14863	0.00427108		Fscn1	1.46749	0.000983809
Lilrb4	2.91059	0.0042748		Syt7	-1.10748	0.000985456
Igfbp3	-1.49687	0.00428075		Pml	1.27031	0.000987001
Sele	1.8736	0.00431688		Alas2	-5.02813	0.000987891
Scn3b	-1.37268	0.00432227		Hsh2d	1.81892	0.000987891
Il24	1.12317	0.00433205		Fam84b	-1.10679	0.000987891
Wbscr27	-1.21478	0.00433823		Ppp2r2b	-1.35154	0.000989551
Olfr503	1.06318	0.00434338		Rdm1	-1.04114	0.000989551
Gbp8	2.15933	0.00434338		Plch2	-1.24043	0.000995739
Mrpl35	1.00131	0.00436891		Fam161a	-1.27475	0.000995936
Cux2	-1.26617	0.00437549		Lrrc26	-3.13547	0.000996005
F9	1.31944	0.00439113		Mthfr	1.0603	0.000997901
Rassf6	-1.21091	0.00439154		Spinlw1	-1.44759	0.00100105
Hamp2	1.10146	0.00439215		5430427O19Rik	1.83361	0.00101329
C2	1.81967	0.00439215		Frmpd1	-1.01958	0.00101329
1600029I14Rik	-2.35172	0.00439315		Ms4a4d	2.24119	0.00101329
Myh10	-1.06474	0.00439315		Cd68	1.38922	0.00102274
Gm9909	-1.07902	0.00440103		Glcci1	-1.05481	0.00102785
2610035D17Rik	-1.00897	0.00440107		Klf12	-1.38016	0.00102994
Siglec5	-2.27691	0.00440381		Fam183b	-1.68032	0.00102994
Pde2a	1.12701	0.00441868		Prrc1	1.23882	0.00103343
LOC629091	1.25891	0.00443445		Dusp14	-1.12538	0.00103716
Plvap	-1.11651	0.00443445		Nr4a2	-2.34163	0.0010406
Dcxr	-1.29438	0.0044539		Adcy8	-1.09706	0.0010406
Acaca	-1.07678	0.0044539		Parp14	1.32818	0.0010406
Olfr744	1.29524	0.0044539		Sla	1.18587	0.00104558
Rab3il1	1.1916	0.00447375		Angpt2	-1.09988	0.00104976
Olfr446	1.25763	0.00449585		0610009L18Rik	-1.15124	0.0010537
Aldoc	-1.22471	0.00449585		Olfr1232	1.48851	0.00105474
Meig1	-2.39174	0.00449585		Batf2	2.45342	0.00105474
Rmnd5a	-1.07824	0.00449585		Slc4a1	-3.83988	0.00105474
Ncf2	1.1924	0.00449973		D830015G02Rik	-1.79126	0.00106202
4930444G20Rik	1.06696	0.00449973		Myh14	-1.11162	0.00106313
Plb1	1.1619	0.00450172		Cldn23	-1.06018	0.00106361
Serpina3c	1.65026	0.00452016		Sytl2	-1.26621	0.0010642
Bhlhe40	1.203	0.00452016		1810065E05Rik	1.652	0.0010657
Kif1c	-1.10909	0.00452016		Ccdc153	-2.03266	0.00106654
Gm5101	-1.4091	0.00452016		Klf9	-1.26764	0.00106875
Dnahc11	-1.71364	0.00452016		Irgm2	1.73026	0.00106875
Ttc30b	-1.14859	0.00452016		Tst	-1.05288	0.00107157
Cyb5	-1.03964	0.00452016		Zmynd10	-1.78391	0.00107239
Nuak2	1.53144	0.00452016		Ppil6	-1.82973	0.00107239
Olfr570	1.21471	0.00452331		Lrriq1	-1.2395	0.00107753
Cd80	1.52324	0.00453278		Ifng	3.83582	0.00107753
Nfkb2	1.59588	0.00453278		Arap2	-1.05863	0.00108395
2610528J11Rik	-1.32418	0.00455235		Batf	1.04182	0.0010841
Dmrt2	-1.87547	0.00456111		Mpped2	-1.45345	0.0010841
1110038B12Rik	1.04666	0.00457537		D030029J20Rik	-1.05929	0.00108911
Stfa2	1.28289	0.00457537		Crip3	-1.44209	0.00108911
Trpm2	1.23628	0.00457661		Ptpn7	1.00621	0.00109306
H2-M2	1.83108	0.00457661		Gm128	-1.27354	0.00109329
Btg4	2.10586	0.00459019		Trpm2	1.00953	0.00109401
S100a4	1.58567	0.00459238		Cenpt	1.07652	0.00109401
Gpnmb	2.26316	0.00459496		Rnf19b	1.4193	0.00109408
Olfr780	1.29347	0.00459496		1700001L19Rik	-1.75315	0.00109736
Rnase4	-1.5364	0.00460545		Nek6	1.00018	0.00109882
AI426330	-1.73182	0.00461192		Klf15	-2.13221	0.00109983
Dnahc6	-2.69678	0.00462182		Ahr	-1.16448	0.00110459
Casp6	-1.01782	0.0046287		Sh3pxd2a	-1.19089	0.00110859
Fkbp11	1.00612	0.00464246		F3	1.26258	0.00110859
Sec14l4	-1.16882	0.00465259		Fap	1.14266	0.00110876
Lrat	-1.99529	0.00466172		Pbld1	-1.26839	0.00111627
Mid1ip1	-1.05525	0.00466172		Prom2	-1.59648	0.00111627
Btg2	-1.40448	0.00466172		Ndc80	1.1992	0.00111627
Uhrf1	1.96693	0.00467359		Arxes2	-1.05272	0.00111627
D730039F16Rik	-1.26214	0.00469161		Brca2	1.15574	0.00111627
Spry1	-1.10209	0.0046954		Gm1966	2.21095	0.00111627
Ampd1	-1.37094	0.00469764		1700088E04Rik	-1.28735	0.00111636
Ttn	-1.87859	0.00469764		Adra1a	-1.10558	0.00111675
Lrrc38	1.09183	0.00469764		Oas1c	1.19579	0.00111675
Crhr1	1.21111	0.00471375		Prex2	-1.18605	0.00111675
Cyp4v3	-1.13167	0.0047312		Kcnq1	-1.08569	0.00111675
BC023105	2.07127	0.0047312		Lilra6	1.20763	0.00111675
1700001P01Rik	1.55882	0.004746		Amigo3	1.01775	0.00111675
Uox	-1.35513	0.00474644		C1qc	2.60668	0.00111685
Tspan1	-1.55012	0.00474644		Gabrp	-2.27219	0.00111685
Stfa2l1	1.51998	0.00475087		Sec14l3	-1.39372	0.00111685
Accn1	1.18731	0.00475191		Calml3	-4.02907	0.00112314
Kcnn4	1.2436	0.00475191		Fbn1	1.34422	0.00112674
Gfpt2	1.36021	0.00475954		Cbr2	-1.84203	0.00112675
Klhl13	-1.14194	0.00477735		Col17a1	-1.13684	0.00113649
Zc3hav1l	-1.05956	0.00478784		Hepacam	-1.07443	0.0011383
Pla2g1b	-1.44391	0.00479814		Fgfbp1	-1.4413	0.00113942
Socs7	2.06458	0.00480147		Ly9	1.60674	0.00114293
Elf5	-1.52257	0.00480147		Cd40	1.26733	0.00114395
Acpp	-1.17985	0.00480147		Lrrn3	-1.26795	0.00114395
Fbll1	1.52429	0.00480147		Rin1	1.485	0.00114395
Rnase6	1.07132	0.00480147		Bmper	1.09519	0.00114395
1700003M02Rik	-1.41393	0.00480147		Ccne2	1.50633	0.00114395
Atp6v1b1	-1.26213	0.00481035		2510049J12Rik	1.03791	0.00114395
Pitpnm3	-1.53598	0.00481035		Ccl20	2.22198	0.00114442
Prr18	-1.32284	0.00481151		1600029I14Rik	-1.59875	0.00114442
Dnase1l3	1.53543	0.00481951		C230072F16Rik	-1.30695	0.00114442
Ankrd44	-1.04196	0.00482296		Epdr1	-1.10438	0.00114703
Ifna4	1.76039	0.00484933		S100a4	1.45254	0.00114765
9030625A04Rik	1.43196	0.00486236		Tuba1c	1.03961	0.0011479
Lrriq1	-1.12378	0.00487658		Slc22a18	-1.00909	0.0011484
5830409B07Rik	1.00533	0.00487658		Hist1h3a	1.4244	0.00115017
Cyth3	-1.10227	0.00488064		LOC639910	1.78133	0.00115017
Chst3	-1.00739	0.0049094		Ttll3	-1.28025	0.00115017
Nr5a1	1.64447	0.0049094		Ifi47	2.01257	0.00115088
Pla2g2c	-1.14689	0.0049094		Rec8	-1.32513	0.00115768
Fam189a2	-2.00513	0.00491605		1810011O10Rik	-1.07455	0.00115935
Gdf3	1.32436	0.00491824		Aplnr	-1.07217	0.00115973
5430402P08Rik	-1.42616	0.00492306		Slamf7	2.39624	0.00115973
Agbl2	-1.39052	0.00492822		Chaf1a	1.4456	0.00115983
Esrrb	1.08123	0.00492822		Psd4	1.18552	0.00116296
9230110I02Rik	-1.1869	0.00493428		Xcl1	3.21262	0.00116296
Apon	1.40348	0.00493428		Pnpla5	1.34716	0.00116956
Mtap7	-1.17111	0.00493428		Pnrc1	-1.045	0.00117344
Mtap1b	-1.10449	0.00493428		Chchd10	-1.35537	0.00117389
Fzd6	-1.05706	0.00493428		Kng1	1.28484	0.00118424
Irak4	1.19509	0.00493428		Mybl2	1.26479	0.00118522
Insl6	1.51697	0.00493428		Acoxl	-2.48392	0.00118862
Adar	1.06605	0.00493428		Ppm1h	1.0052	0.001191
Mxi1	-1.04749	0.00493428		Ccl11	3.23513	0.00119679
Clec4b1	1.04652	0.00493428		Nap1l3	-1.05739	0.0011979
Olfr544	1.1154	0.00493428		Fgl1	1.16136	0.00119892
Smad6	-1.26507	0.00493428		Ptgfr	-1.35005	0.00119892
Cbr1	-1.02434	0.00493428		Pnpt1	1.0079	0.00119892
Rab5c	1.60207	0.00493428		Fank1	-1.40479	0.00119892
1810012P15Rik	-1.54919	0.00493428		Capg	1.02424	0.00119925
Cabp4	1.50869	0.00493428		Lrrc36	-1.2954	0.00120372
Fhod3	-1.03406	0.00493428		Col5a2	1.6252	0.00120372
Rab38	-1.03564	0.00493428		Rfc4	1.04108	0.00120372
Plekho2	1.16736	0.00494009		Rab36	-1.25583	0.00120472
Olr1	-1.3254	0.00494718		Rnf186	-1.69946	0.00120648
Fcer2a	-1.02281	0.00494879		A430107O13Rik	-1.0046	0.00120707
9930014A18Rik	-1.2452	0.00494879		Tekt4	-1.19587	0.00120785
B430306N03Rik	1.6077	0.00497473		Csf3r	1.22867	0.00121637
Efr3b	1.38817	0.00497473		1700110I01Rik	-1.26672	0.00121679
Klf15	-1.66751	0.00497627		Il21r	1.65264	0.00122056
Psme2	1.03118	0.00497627		Spag17	-1.31658	0.00122086
Htra3	-1.28369	0.00497627		Lrrc23	-1.54901	0.00122221
Cables1	-1.02069	0.0049909		Xrcc3	1.15122	0.00122747
Cenpv	-1.04781	0.0049909		Dusp2	1.44073	0.00122747
Samhd1	1.55516	0.0049909		Rassf6	-1.07526	0.00123166
Upp2	1.11915	0.00501667		Slc35d3	-1.19819	0.00123166
E330018M18Rik	-1.26307	0.00501667		Gngt2	1.0056	0.00123169
Dbndd1	-1.26767	0.00503402		Dyx1c1	-1.18827	0.00123649
Prrg1	-1.03828	0.00504165		Nnmt	1.61518	0.00123835
Ulk2	-1.32886	0.00504185		Cd86	1.79578	0.00123835
Apol7a	2.52892	0.00504609		Plagl1	-1.32881	0.00124101
9630028I04Rik	-1.16078	0.00505555		Lss	-1.09383	0.00124101
Unc93b1	1.07803	0.00505667		1700013F07Rik	-1.25323	0.00124837
Cyp39a1	-1.54615	0.00505667		Spsb1	1.12892	0.00125212
Kif5c	1.35319	0.00507092		Zfyve9	1.32083	0.00125272
Spats2l	1.26177	0.00507366		Ttc25	-1.59382	0.00125385
Bbox1	-1.8882	0.00508174		Prss46	1.71369	0.00125385
Thbs3	-1.62026	0.00508174		Clec12b	-1.4451	0.00125878
Pcca	-1.17774	0.0050843		Cd274	2.34956	0.00126026
Hells	1.27937	0.00508838		C730049O14Rik	-1.10526	0.00126114
Slc13a4	-1.14066	0.00508838		Bpifb1	-4.9982	0.00126114
AI317395	-1.08146	0.00509502		Hpgds	1.70965	0.00126128
Ccdc17	-2.09532	0.00510656		Darc	2.75911	0.00126609
Slc16a11	-2.14254	0.00512523		Qpctl	1.02043	0.00126697
Fam75d3	1.10582	0.00512538		E2f7	1.64712	0.00126809
Crygd	1.13857	0.00513205		E030010N08Rik	-1.98319	0.00127115
Ctss	1.52738	0.00515363		Fam167b	1.49852	0.00127373
A530079E22Rik	-1.04543	0.00515573		Nlgn2	1.00357	0.00127498
Clec4d	2.08113	0.00515573		Gbp9	1.8457	0.00127525
Ccdc85a	-1.08768	0.0051577		H2-Bl	2.23438	0.00127545
Cxcr3	1.56805	0.00517748		Dok2	1.15941	0.00127896
Slc15a2	-1.10956	0.00522017		Ankrd1	1.45301	0.00127918
4921509J17Rik	-1.56037	0.00522795		BC055004	1.64783	0.00128109
Samd9l	1.32589	0.00526927		Tmem232	-1.80441	0.00128606
Trim6	1.12189	0.00529193		Trim34a	1.47832	0.00128727
Lce1m	1.02957	0.00531328		Lrrc51	-1.32927	0.00129008
Lair1	2.06823	0.00532404		1190002N15Rik	-1.14385	0.00129377
Nlgn2	1.07374	0.005337		Agbl2	-1.13432	0.00130196
9330182L06Rik	-1.20415	0.00534361		A530064D06Rik	1.78261	0.00130196
F13a1	1.30757	0.00534642		Atp10a	1.54391	0.00130563
1700045I19Rik	-1.39724	0.0053593		Psmb9	1.5444	0.0013103
Klhdc1	-1.04167	0.00538934		Slc38a4	-1.45415	0.00132605
Slc9a2	-1.40183	0.00538934		Tspan1	-1.40928	0.00132629
Afap1l1	-1.13377	0.00540775		Hpcal4	-1.54763	0.00133541
Ids	-1.05458	0.0054091		Armc3	-1.25433	0.00133595
Ulk4	-1.59474	0.0054091		Mcf2l	-1.54823	0.00133918
Morn3	-1.64935	0.0054091		Mmp25	1.63813	0.00133918
4831426I19Rik	1.67313	0.0054091		Pitpnm3	-1.31166	0.00133918
AY761185	1.03435	0.0054091		Fbxw17	1.09076	0.00134163
Pbp2	1.81322	0.0054091		Ryr2	-1.53276	0.00134332
Tac2	1.00356	0.00541538		D130043K22Rik	-1.26895	0.00134706
Prelp	-1.43212	0.00541662		Sema3c	-1.34016	0.00135321
D230018H15Rik	-1.18498	0.00541662		Txnip	-1.11103	0.00135321
Ak2	1.05326	0.00542206		Pdcd1	2.30791	0.00135422
Fank1	-1.81568	0.0054291		Ccdc85a	-1.36624	0.00135578
Sla2	1.06734	0.00543029		Ncf4	1.29978	0.00135925
Psrc1	1.45453	0.00545431		Chst8	-1.38291	0.00136714
BC055004	1.17738	0.00546267		LOC545261	-1.6818	0.00136714
Fbxw17	1.04924	0.00546682		1700024G13Rik	-2.32849	0.00137065
Ptpn6	1.27258	0.00547924		Bak1	1.47325	0.00137451
Igdcc4	-1.15991	0.00548004		Acot1	-2.23568	0.00137518
Pld4	1.18357	0.00548004		C230035I16Rik	-1.15806	0.00137636
E230029C05Rik	1.2969	0.00548874		Hkdc1	-1.07525	0.00137863
D330028D13Rik	-1.05583	0.00548874		B430306N03Rik	1.3821	0.00139273
Cyp2a4	-4.13652	0.00548874		Ccdc65	-1.08043	0.00140482
Sh3pxd2a	-1.17484	0.00548874		Sec14l4	-1.40523	0.0014086
Rnd3	1.21592	0.00548874		Calcoco1	-1.04066	0.0014086
Scgb1c1	-1.74089	0.00548874		Tnfrsf10b	1.05684	0.0014086
Ppm1l	-1.216	0.00548874		Il12rb1	2.72685	0.0014086
Stk33	-1.79781	0.00548874		Myl4	-1.9224	0.00141294
Bbs9	-1.12978	0.00550839		Mcoln3	-1.0432	0.00141633
Klhl24	-1.45038	0.00550839		Socs3	1.29639	0.00141851
Krt33b	1.1834	0.00551176		Hoxa1	-1.0086	0.00141858
Cyp2c44	-1.19509	0.00551176		Ttc16	-1.68346	0.0014196
Zmat3	-1.13872	0.00551625		Gjb5	2.0149	0.00142141
Gsc2	1.1738	0.0055204		Eif2c4	-1.07763	0.0014216
Gpld1	-1.11767	0.00554158		Ly6f	2.40811	0.00142198
Rtdr1	-1.62712	0.0055428		Gm8995	1.91582	0.0014256
Gm1661	-1.13081	0.00556309		Hist1h2be	-1.26186	0.0014256
Rpl21	1.01728	0.00556309		Spdef	-1.16428	0.00142635
Nrxn2	1.0274	0.00559006		Fbxl13	-1.34674	0.00142635
Rhcg	2.08878	0.00559006		Adar	1.01574	0.00142788
Btk	1.39629	0.00560857		Fgfr3	-1.05629	0.00142963
Abra	-1.58061	0.00561062		Cenpq	1.02194	0.00142972
4933415A04Rik	1.15397	0.00561253		9030425E11Rik	1.24761	0.00142972
Pydc4	2.05446	0.00562108		Dock2	1.28928	0.00143239
Tcl1b2	1.15408	0.00562651		Naip2	1.08329	0.00143239
4933432I09Rik	1.14959	0.00563255		Ddx19a	1.03178	0.00143336
D830015G02Rik	-1.54928	0.0056525		2022-09-03	-1.17288	0.00143592
Ikbkg	-1.02232	0.00569097		Bcat1	1.52147	0.001439
Fhit	-1.45049	0.00569288		Arhgef38	-1.45619	0.00144221
Cd109	1.00368	0.00569355		Fpr1	-1.3567	0.00144241
Negr1	-2.25336	0.00569355		Trp53i11	1.07321	0.00144666
Gprc5d	1.18245	0.00570133		Fhit	-1.36508	0.00145091
Fgf1	-1.56062	0.00570133		Slc23a3	1.33755	0.00145098
Ttc16	-1.63237	0.00571303		Ahcy	1.05235	0.00145758
Bmx	-1.17788	0.00571303		Irak4	1.01103	0.00146052
Baiap2l1	-1.35888	0.0057267		4931429I11Rik	-1.28628	0.00146097
Ms4a14	1.37801	0.00573985		Prdm8	-1.54025	0.00146253
Lipg	1.33407	0.00573985		Nrcam	2.41565	0.00146253
Kcnk12	-1.27745	0.00577315		Mthfd1l	1.24749	0.00146341
Ccdc78	-1.56198	0.00577569		Lypd6	-1.32204	0.00147224
9430079G20Rik	-1.12872	0.00577827		Nxph3	-1.33617	0.00147406
Tspyl5	-1.03876	0.00577827		Nfkbie	1.45456	0.00147406
Itgb1bp2	-1.17368	0.00577827		2022-03-01	1.14358	0.00147406
4930478P22Rik	1.74352	0.00578471		C130026I21Rik	2.10084	0.00147618
Ifna12	1.67755	0.00579501		Bcl2a1b	1.31016	0.00147818
Cyp2e1	-2.62523	0.00582004		Zfp354b	-1.10012	0.00147818
1700049E17Rik1	-1.12335	0.0058286		Ckap4	1.23883	0.00148027
Mfsd4	-1.18142	0.00582995		Snhg11	-1.60699	0.00148171
Arhgef12	-1.23362	0.00583724		Pla2g7	1.74537	0.00148312
6230424C14Rik	-1.17139	0.0058434		Morn3	-1.04196	0.00148709
Acsf2	1.93227	0.00587684		Trim30b	1.50606	0.00148761
Chpf2	1.04386	0.0058812		C030034L19Rik	-1.0897	0.00148953
Ednrb	-1.04326	0.00590338		C530008M17Rik	-1.10459	0.00149061
Prrc2b	-1.06413	0.00591194		Pde8b	-1.42796	0.00149167
9030607L20Rik	1.11423	0.00594654		Trim12a	1.35145	0.00149333
Serpina3j	2.40622	0.00594707		Marcksl1	1.10446	0.00150742
Isg20	1.61495	0.00595166		Chst1	-1.05274	0.00150742
Ace2	-2.1465	0.00595866		Eps8l1	-1.20939	0.00150742
Pim1	1.03591	0.00596799		Olfr741	1.10495	0.00151966
Azgp1	-1.61299	0.00600016		Ccdc96	-1.01715	0.00151966
Olfr411	1.01776	0.00601595		Icam5	1.31188	0.00152959
Enkur	-1.69398	0.00604736		4921509J17Rik	-1.53925	0.00153657
Akr1b7	-1.24347	0.00605078		Kcnk2	-1.35572	0.00153994
Ttc18	-2.17434	0.00605886		1500009L16Rik	1.55289	0.00153994
Arhgap9	1.25045	0.00605941		1700123I01Rik	1.59616	0.00154524
Hpx	2.13018	0.00607059		Acbd7	-1.40866	0.00154524
C630004H02Rik	-1.18638	0.00607453		Islr	1.26273	0.00155049
Panx1	1.05236	0.00607453		Lrrc56	-1.22576	0.00155356
Tarsl2	-1.1943	0.00607453		Orm2	1.85393	0.00155518
Cldn10	-2.22187	0.00607453		Tmem86a	1.09858	0.00156326
Lepr	-1.17229	0.00607462		Tekt1	-1.25066	0.00156782
Cbx2	-1.04177	0.00608649		Il2ra	1.52144	0.00157281
Mettl7a1	-1.07467	0.00608728		Gm16499	-1.7889	0.00158311
Ear11	-1.18701	0.00611315		Tube1	1.27534	0.00158651
9130022000000000	-1.14481	0.00611315		5430414B12Rik	-1.18194	0.00158672
Tbata	-1.88346	0.00611315		Skp2	1.07863	0.00158947
Rarg	1.31217	0.00611713		Klhdc8a	1.35004	0.00159205
Pdss1	1.16379	0.00612771		Pld4	1.47766	0.00159643
Dnahc7a	-2.0556	0.00612773		Krt85	1.45269	0.00160252
2310031A07Rik	1.68892	0.00615006		Rrm1	1.19652	0.00160713
Tc2n	-1.14703	0.00616478		Pink1	-1.44208	0.00161165
9530083O12Rik	-1.34427	0.00616478		Krt8	1.23916	0.00163222
Parp12	1.62224	0.00616478		C2cd4b	-2.01206	0.00163511
Dcp2	1.02433	0.00621149		BC013712	1.65008	0.00163511
Clec14a	-1.78796	0.00621658		Rptn	-1.66238	0.00163533
Shh	-1.04012	0.00624598		Dnali1	-1.34691	0.00164221
Ablim1	-1.02975	0.00624598		Cryaa	-1.41781	0.0016485
Col17a1	-1.22198	0.0062538		A330023F24Rik	-1.02029	0.00165379
Fam54a	1.47227	0.0062538		Mlc1	-1.34546	0.00165521
Gdf1	-1.23641	0.0062538		Ces1g	-1.28508	0.00165521
Fam183b	-1.85919	0.00628756		Wdr52	-1.23891	0.00165521
4930579G24Rik	1.07088	0.00630452		Lilrb4	2.8453	0.00165632
Otog	1.18883	0.00630452		Tubb5	1.03357	0.00165924
Rgs7bp	-1.23733	0.00630934		Ankrd6	-1.02538	0.00166294
4430402I18Rik	-1.05721	0.00630934		Pkib	1.48526	0.00166352
Abca5	-1.06846	0.00632206		Thbs2	1.86838	0.00166352
Cdkl1	-1.12313	0.00632284		Clu	1.27952	0.00166352
Rcan2	-1.41719	0.00633727		Ptpn6	1.19553	0.0016664
Nudt11	-1.417	0.00637699		Col3a1	1.2484	0.0016664
Rb1cc1	-1.04078	0.00637699		Lpar3	-2.07744	0.0016664
Xirp2	-1.74984	0.00637699		Srcin1	-1.4934	0.0016664
Cyp3a13	-1.31563	0.00637699		Ccdc13	-1.34804	0.00166736
Klhl3	-1.04759	0.00641311		Bhlhe40	1.20845	0.001679
Rnf186	-1.89538	0.00641873		Serpinb8	1.26002	0.00168578
Mia1	-1.59212	0.00641873		Ehbp1l1	1.04229	0.00169952
Plin5	-1.38623	0.00641873		4930455F23Rik	-1.20885	0.00170525
Gsta4	-1.71386	0.00642015		Hhip	1.17215	0.00171786
Zfy1	1.0611	0.00643322		2010003O02Rik	-1.02043	0.00171929
Gm5296	-1.2095	0.00643904		Il18rap	1.44784	0.00172712
Adra2a	-2.07104	0.00645787		Bcl2l15	1.7222	0.00173181
1110032A04Rik	-1.25085	0.00647134		Abcb1b	1.04043	0.00173322
Lrrc56	-1.29383	0.00647165		Plb1	1.50633	0.0017347
Ucp3	-1.30157	0.00647584		Stmn2	-1.02684	0.00173959
Ccdc92	-1.01646	0.00649911		Tprgl	-1.02249	0.00173959
Naaladl2	-1.26533	0.00649911		Fmo2	-1.32403	0.00174055
Agr3	-1.77048	0.00653009		Klhdc9	-1.60349	0.00174234
Gbp4	2.21318	0.0065425		Aim1	1.18849	0.00175097
Gm19925	-1.16088	0.00657079		Ccdc151	-1.14996	0.00175347
Fzd2	-1.02589	0.00658243		C030014L02	-1.18947	0.0017613
Acsl1	-1.20042	0.00658778		Prss8	-1.10513	0.00176596
Fam184a	-1.02621	0.00659566		Efcab10	-1.9979	0.00176596
Pex1	1.26905	0.00659566		Cybrd1	-1.24021	0.00176596
Col22a1	1.04827	0.00659637		Soat2	1.54017	0.00176982
B3gnt4	-2.29571	0.00659637		Gbp4	2.35065	0.00177987
Lrrc50	-1.92465	0.00659637		Il2rg	1.18926	0.00178077
Park2	-1.08001	0.00659949		Cttnbp2	-1.46723	0.00178077
Myh8	-1.82036	0.00663875		Osbpl6	-1.0122	0.00178159
Olfr1394	1.24678	0.00665031		Rcan1	1.23383	0.00178366
Jmy	-1.23747	0.00666993		4833427G06Rik	-1.04261	0.00178724
Slc1a2	-1.06506	0.00666993		4932425I24Rik	-1.09132	0.00179911
C87499	1.01636	0.00671717		Tapbp	1.22778	0.00180467
Fn3k	-1.86605	0.00672004		Iqcg	-1.0547	0.00181061
Rgma	-1.06561	0.00673096		Fblim1	1.39058	0.00181949
Sox18	-1.10808	0.0067348		Gfra1	-1.3228	0.00181949
Ptprm	-1.27035	0.00674632		Sh2d5	1.27255	0.00181949
Kcne2	-1.80171	0.00678447		Ccdc37	-1.6935	0.00181949
Ifi203	1.28652	0.00684514		Bbox1	-1.3779	0.00182164
Irx6	1.15353	0.0068604		Ass1	1.5029	0.00182164
Stxbp4	-1.23051	0.00687947		Emilin1	1.15419	0.00182164
N4bp1	1.23022	0.00690042		1700019L03Rik	-1.71938	0.00182204
Zscan18	-1.04723	0.00690042		Fam13a	-1.27332	0.00183177
Il2ra	1.16231	0.00690042		4932415M13Rik	2.20919	0.00184295
Acoxl	-1.97466	0.00692538		Tifa	1.04547	0.0018441
A430089I19Rik	1.92667	0.00692538		Snca	-4.32979	0.00184417
Cenpi	1.37207	0.00694358		Abcg5	-1.39443	0.00185258
Piwil2	1.25225	0.0069473		A530032D15Rik	2.04929	0.00186176
Calcr	1.07584	0.0069473		Nrn1	-1.85864	0.00186923
Olfr266	1.60584	0.0069473		Sct	4.00561	0.00186951
Cdca5	1.44384	0.0069473		Enkur	-1.72679	0.00186951
Mitd1	1.44084	0.00695429		Krt6a	2.22118	0.00187324
Ypel3	-1.19886	0.00695429		Wdr38	-1.01673	0.00187324
Myo1f	1.04979	0.00695429		Nap1l5	-1.95049	0.00187324
Myh6	-2.67397	0.00697767		Has2	2.23765	0.00187324
Sned1	-1.25219	0.00700179		Cyp39a1	-1.24892	0.00187856
Cxcr7	1.24104	0.00701709		Cxcl13	5.35489	0.00188923
Inadl	-1.1181	0.00701711		Bcl2a1c	1.70442	0.00189035
Mob3b	-1.29871	0.00702158		Pdpn	1.00732	0.00189035
Fam92b	-2.57699	0.00704234		2210011C24Rik	-1.2589	0.00189276
Mt4	2.00255	0.00707804		Pydc4	2.03856	0.0018945
2010001K21Rik	-1.89858	0.00708979		Masp1	1.15286	0.0018949
Rbm3	1.24852	0.00713024		Trim21	1.2097	0.00189931
A730054J21Rik	-1.821	0.00714891		Unc79	-2.50949	0.00189931
Mapk10	-1.13151	0.00716926		Bnip3l	-1.00203	0.00190042
Gpx2-ps1	-1.17259	0.00717191		Selplg	1.07734	0.00190275
Wfdc12	1.46592	0.00717881		Pla2g1b	-1.21964	0.001906
Fam13c	-1.06795	0.00720389		Tor1aip1	1.01505	0.00190785
Cyp4f15	-3.24072	0.00720389		Apol6	2.80501	0.00190854
Ptpn13	-1.24005	0.00720389		Nudt5	1.11521	0.00190854
Fgf23	1.54325	0.00720389		Meig1	-2.06564	0.001913
LOC100503160	3.32149	0.00720389		Gbp7	1.62552	0.00191455
Lims2	-1.04908	0.00721576		Kcne2	-1.39191	0.00191617
Frem2	-1.84178	0.00723503		Wnt10b	-1.36424	0.00191617
1700024G13Rik	-2.37685	0.00723699		Fam83e	-1.697	0.00192011
Cited2	-1.00503	0.00725456		Atp6v1b1	-1.12931	0.0019278
BC006779	1.03684	0.00728833		Slc25a27	-1.11908	0.00193341
Dync2h1	-1.16953	0.00730326		Dynlt1e	-1.12312	0.00193717
2310015B20Rik	-1.07792	0.00730326		Lrrc6	-1.45022	0.00195286
1810029B16Rik	1.02841	0.00730781		Sobp	-1.2138	0.00195286
Synm	-2.12895	0.00730781		3200002M19Rik	1.36686	0.00196215
Alx4	1.20292	0.00730822		Ear11	-1.33141	0.00197751
Acsbg1	1.04488	0.00731074		Nek11	-1.13296	0.00197773
Pcbd1	-1.0089	0.00731074		Rgmb	-1.03139	0.00198083
Fosl1	2.27479	0.00731074		Nt5c3	1.58041	0.00199499
Mmp15	-1.33739	0.00734215		Tbata	-1.73798	0.00200207
2700086A05Rik	-1.38101	0.00743889		Clec4e	1.80947	0.00200818
Hcn4	1.02851	0.00745989		Mlf1	-1.11434	0.00200839
Tbc1d16	-1.17966	0.00746048		Tap2	1.36181	0.00201766
Acer2	-1.24134	0.00746872		Cited2	-1.02294	0.00202331
Clic5	-1.17538	0.00748479		BC048546	-1.64639	0.00202331
1700023F06Rik	1.30884	0.00749052		Krt5	2.66014	0.00203381
Capsl	-1.53023	0.00750183		Spef1	-1.34548	0.00203381
4930579G22Rik	-1.19768	0.00750535		2310008H09Rik	1.15901	0.00203826
Mex3b	-1.06178	0.00750849		Rsph4a	-1.22217	0.00203983
Tie1	-1.00748	0.00750849		Gm20559	1.01868	0.00204065
Mmp2	-1.03676	0.00751125		Myl7	-2.1687	0.00204542
A730049H05Rik	1.21718	0.00751414		Sele	1.09609	0.00204663
Ddx4	1.49394	0.00751429		Arhgap30	1.03796	0.00204698
Aurka	1.4796	0.0075188		Ptpn20	-1.10775	0.00206999
Olfml2a	-1.55301	0.00758217		E230008N13Rik	-1.38461	0.00206999
B230114P17Rik	-1.32329	0.00758217		Gvin1	1.74818	0.00208942
Dner	-1.40482	0.00759039		Fanca	1.20073	0.00208942
Grwd1	1.12918	0.00759058		Ptrh1	1.02142	0.00208942
Gtl3	-1.12601	0.0076259		Dnahc12	-1.41525	0.0020916
Gjb2	-1.01188	0.00763598		Insl6	1.71525	0.00212289
Sgsm1	-1.03898	0.00763598		Crtam	2.15485	0.00212329
4932425I24Rik	-1.43113	0.00763598		Fabp5	-1.17873	0.00215741
Adh7	-1.87479	0.00763978		Ccdc74a	-1.18218	0.00215741
Ctsw	1.36516	0.00770786		Unc93b1	1.01414	0.00215753
Etv5	-1.5395	0.00770807		Scgb3a2	-3.59627	0.00215753
Myl4	-1.73738	0.00770807		1700012B09Rik	-1.73872	0.00215795
Slc6a2	-1.23086	0.00770807		9130014G24Rik	-1.15902	0.00216921
1700009P17Rik	-1.43855	0.00770807		1700003M02Rik	-1.14425	0.0021829
Snx22	-1.26978	0.00772731		1700094D03Rik	-1.10201	0.002187
Ifi30	1.04898	0.00777946		4930578N16Rik	-1.01201	0.00218875
Celsr1	-1.00163	0.00780351		8030451A03Rik	-1.37834	0.00218896
Lrrc36	-1.67946	0.00780351		Arg2	1.14921	0.00219589
Utrn	-1.07852	0.00780351		Mat2a	-1.26102	0.00220593
Map2k6	-1.28719	0.00780412		Tpm2	1.2279	0.00223043
Olfr1218	1.17813	0.00781597		Stard8	-1.04075	0.00224047
LOC676708	2.33596	0.00782013		Prrg1	-1.00207	0.00224989
Crip3	-1.32722	0.00782013		Adam28	-1.64283	0.00225509
Lrrc43	-1.30551	0.00782013		Gm8300	1.08617	0.00226221
Slc28a2	1.97028	0.00782013		Il4i1	1.33311	0.00226781
9330175E14Rik	1.43086	0.00782013		Nme5	-1.0257	0.00227594
Gm4340	1.0091	0.00782013		Zranb3	1.11963	0.00228522
Wipf3	-1.05719	0.00782013		Tspan4	1.18796	0.00228522
Olfr282	1.02762	0.00782058		Sox2	-1.16019	0.00228966
Pnck	-1.05628	0.00783137		Ccdc39	-1.17956	0.00229584
Ldhb	-1.76855	0.0078323		Six4	-1.64563	0.0023125
Gm8300	1.28749	0.00787419		Glrp1	1.29212	0.00236171
Klk1b4	1.29188	0.00788145		9530076L18	1.10312	0.0023796
Klra16	1.1232	0.0078929		Stfa2l1	1.33659	0.00238507
Dusp1	-1.41174	0.00789927		Clec7a	1.25401	0.00242017
Gm12250	2.72729	0.00791512		Hey1	-1.12428	0.00244311
Nagpa	1.8046	0.0079287		Ulk4	-1.17982	0.00244824
Rsph10b2	-1.49484	0.00793138		Glb1l3	-1.39609	0.00245749
Mybph	1.2054	0.00793183		Dydc2	-1.0612	0.00245794
AI662270	1.43498	0.00793206		Scrt1	1.10226	0.00246287
Tnfrsf18	1.33894	0.00794008		Osbpl3	1.15971	0.00247024
Ryr2	-1.39383	0.00794851		Cxcr3	2.03796	0.00247185
Chst8	-1.15178	0.00796464		Npb	-1.17688	0.00247754
Olfr291	1.9059	0.00797497		Ptger3	2.1804	0.00248119
1700019L03Rik	-1.82727	0.00798469		Gpr171	1.78705	0.00250369
Sord	-1.50587	0.00799092		Klrk1	2.37936	0.00251369
Tmem171	1.23104	0.00799513		Gm4951	1.66052	0.00251518
Cysltr2	1.50664	0.00799513		Fermt3	1.0731	0.00252514
Foxp2	-1.04649	0.00799779		A930038C07Rik	1.65694	0.0025253
Plin2	1.32002	0.00807385		Ido1	3.41883	0.00253072
Pi15	1.04011	0.00808496		Prr11	1.10455	0.00253394
Fam174b	-1.0224	0.00808658		Gm5431	1.58084	0.00254477
Hes1	-1.22076	0.00809868		Mdm4	1.02252	0.00256172
Unc13b	-1.0014	0.00812408		Slc28a2	1.46768	0.00257382
1700023L04Rik	-1.3314	0.00813109		Mpp6	1.02723	0.00257646
Pam	-1.00281	0.00817806		Ccdc150	-1.71314	0.00259326
8030451A03Rik	-1.46567	0.00817806		Dio3	2.09814	0.00259734
Tceal1	-1.24421	0.00817806		Frem2	-1.34173	0.00259856
Olfr398	1.21666	0.0081807		Ear7	-1.08432	0.00261283
Ptgir	1.07864	0.0081807		Tnn	-1.0876	0.00262056
Rpf2	1.10178	0.00819001		Gpr88	1.27381	0.00264387
Fhl3	1.06214	0.00820526		Kif5c	1.29539	0.00265432
Tcp11l2	-1.06364	0.00820526		Cpz	1.01118	0.00265432
Vcam1	1.19853	0.00820885		Ms4a14	1.33753	0.00265432
D130020L05Rik	1.37558	0.00824262		Gm2788	1.03773	0.00266406
Cldn23	-1.12862	0.00830336		1700113I22Rik	1.05918	0.00266962
D630004D15Rik	-1.11453	0.00830544		Foxp1	-1.07506	0.00268099
Trim34a	1.10806	0.00830544		Fxyd4	1.80628	0.00268784
Pkib	1.41869	0.0083236		Gzmc	3.28153	0.0026896
Gch1	1.46692	0.00837502		1190001M18Rik	1.32907	0.00269673
Npr1	-1.0121	0.00838171		Bpifa1	-6.33519	0.00269673
Ier5l	1.20616	0.0083873		Spns3	1.08158	0.00269769
Ccr1	1.61997	0.00838918		Lrrc43	-1.18631	0.00269769
Cox8b	-1.56231	0.0084497		Tmem121	1.14425	0.0027057
Arg1	1.87801	0.00845213		Tnxb	-1.11109	0.00271974
E030010A14Rik	1.35643	0.00847546		Sema7a	1.05701	0.0027218
Tssk6	1.21737	0.00847546		Arhgap9	1.2634	0.0027218
Klhl1	1.3086	0.00849746		2310034G01Rik	-1.08117	0.00272313
Zfp704	-1.37338	0.00852833		Col22a1	1.0595	0.00272313
5031425E22Rik	-1.6781	0.00854921		Zmynd15	1.26109	0.00272572
Pcdhac2	-2.05796	0.00854921		Ppargc1a	-1.0266	0.00275262
Mdh1b	-1.77469	0.00854921		Snx20	1.31278	0.00276288
Olfr1054	1.09596	0.00856642		Mgp	1.31929	0.00277095
Lass6	1.1559	0.00856904		Ccdc121	-1.14479	0.00277763
Serpina4-ps1	2.30024	0.00858606		Blm	1.17403	0.00278355
A430035B10Rik	-1.19915	0.00859375		Cd48	1.12494	0.00280011
Ephx4	-1.00377	0.00862227		Cpn1	-1.1096	0.002805
Atf3	2.06491	0.00862227		Cobl	-1.03954	0.00281122
Slc25a36	-1.00237	0.00862422		Sgpp2	-1.07138	0.00282334
Inmt	-1.00054	0.00863155		Rsad2	3.58394	0.00283319
Igsf10	-1.43863	0.00864629		Plat	1.02674	0.00283551
Pira2	1.39411	0.00865174		Dctd	1.36851	0.00283939
Aplnr	-1.86775	0.00865174		Tmem37	1.11113	0.00287619
Fpr1	-1.43997	0.00867919		Lig1	1.14035	0.0028843
Npnt	-1.37046	0.00868934		Clec4a3	1.33508	0.00289406
D630042F21Rik	3.15442	0.00869793		Pde4b	-1.09866	0.00289406
Asb4	1.46132	0.00872102		5430402P08Rik	-1.70674	0.00289849
2610015P09Rik	-1.0169	0.00872102		Slc29a3	1.03599	0.0029081
Rap1gap	-1.04944	0.00873619		H2-M3	1.12618	0.00292118
Hepacam2	-1.95474	0.00873619		Cd180	1.56	0.00293302
Fos	-1.45424	0.00873619		Capn6	1.18799	0.00297037
Grhl1	-1.02967	0.00873619		Nuak2	1.12993	0.00297795
Lrguk	-1.76534	0.00873619		Klk1	1.70857	0.00300296
Chrna9	2.14201	0.00874036		Pcp4l1	-1.50725	0.00301845
Clec9a	-1.15852	0.00881431		S100a6	1.36738	0.00301845
Slc36a3	1.05124	0.00884006		Slc2a6	1.44104	0.00301845
Angpt4	-1.02425	0.00884315		Fn3k	-1.85264	0.00302285
Dync2li1	-1.35573	0.00886489		Nppa	-4.15555	0.0030375
Sgca	-1.02037	0.00887672		Nek5	-1.04595	0.00304206
Bai1	1.52891	0.00887672		Acp5	1.00096	0.00304206
Defa20	1.56966	0.008902		Uox	-1.46854	0.00304837
Gfra2	-1.11253	0.0089154		Arg1	3.33248	0.00305322
1110020A21Rik	-1.15688	0.00895484		Ccl9	1.71665	0.0030567
Coch	1.36904	0.00897755		Yy1	-1.34469	0.00305974
Dyx1c1	-1.25249	0.00897755		2610204G22Rik	-1.09633	0.00308018
Timm8a2	2.40655	0.00897775		9330175E14Rik	1.72243	0.00308092
Ccdc141	-1.33603	0.0090076		Rhox5	1.40154	0.00308092
Acss3	-1.11234	0.00900912		Klra2	1.23911	0.00308206
Ptprb	-1.44804	0.00901753		Fbxo36	-1.01218	0.00310023
Icam5	1.46506	0.00901753		Asap3	1.01791	0.00311572
Gsdmc3	1.17675	0.00901838		Ahsg	1.35772	0.00313566
Klra22	1.07171	0.00901838		4933430H15Rik	-1.00329	0.00315987
Col14a1	-1.47524	0.00903076		5430435G22Rik	1.05354	0.00317046
Foxs1	1.05827	0.00903076		Gp2	-1.89661	0.00320382
Csf3r	1.16769	0.00903638		Hspbap1	1.26957	0.00320382
Wdr69	-1.70787	0.00907061		Prrx2	1.42758	0.00320851
Serpinf1	-1.17149	0.0090911		Folr1	1.18635	0.00320966
3200002M19Rik	1.30519	0.00912038		Mov10	1.25547	0.00324394
Krt17	1.3984	0.00912898		Ifi203	1.35258	0.00324825
Srst	1.1421	0.00914486		Matk	1.3271	0.00326495
Ramp1	-1.09771	0.00917666		Cda	1.20129	0.0032803
1700088E04Rik	-1.23186	0.00923288		Tnnt2	-1.50094	0.00328155
Dnajb13	-1.24674	0.0092454		Mmp19	1.03706	0.00329285
Ankrd50	-1.05483	0.00924882		Fez1	-1.05057	0.00330561
1600029D21Rik	-1.30851	0.00926784		Adh7	-1.73007	0.00331441
Cyp2b13	-1.25925	0.00926784		Itga1	-1.1823	0.00331557
Phgr1	1.52648	0.00926784		Slc2a12	-1.03078	0.00337511
Cts7	2.45196	0.00926784		2022-03-04	-1.07245	0.00338986
BC060267	-1.25266	0.00929541		Cldn22	-2.26576	0.00339222
Zmynd10	-1.90497	0.00932383		Tctex1d4	-1.00057	0.00341278
Cnpy1	-1.58357	0.00932384		A2m	1.5058	0.00341291
Atp10a	1.23175	0.0093707		Fxyd6	1.11948	0.00342741
Kndc1	-1.4921	0.00941208		Cpne5	-1.32485	0.00342883
Serpine1	1.43263	0.00943058		LOC100504785	1.10166	0.00344746
Prlr	1.22352	0.00947376		Spock2	1.0423	0.00345501
D030029J20Rik	-1.00798	0.00947376		2410076I21Rik	-3.70571	0.00345501
Apof	1.33285	0.00950703		Ces1b	-1.29736	0.00348754
Grb7	-1.38918	0.00951497		Nudt11	-1.09264	0.00349239
Cldn9	1.06596	0.00955164		Slc9a2	-1.17309	0.00351004
Tmem204	-1.003	0.00955641		1810008I18Rik	-1.19129	0.00352081
Neil2	1.33571	0.00960421		Ffar2	1.89466	0.00352081
Ccdc13	-1.18689	0.00965001		Ccr9	1.27538	0.00353562
Bhlhb9	-1.0781	0.00975513		2900006K08Rik	-1.5889	0.00354002
Bcl2a1c	1.41211	0.0097579		4930588N13Rik	-1.57987	0.00354206
2410004P03Rik	1.04368	0.00975898		Ehbp1	1.00234	0.00357087
4930539N22Rik	2.76029	0.00977684		Gm12185	1.39932	0.00357219
Slc35d3	-1.05097	0.00978574		Fabp12	-1.27784	0.00358338
Hbb-b1	-1.17886	0.00981604		Bcl6b	1.06844	0.00361094
Enc1	1.02267	0.00982931		AF251705	1.3008	0.00361308
Fam160a1	-1.03305	0.00987819		Stfa1	1.36563	0.0036175
Ldlrad1	-1.86229	0.00988228		Fosl1	1.11864	0.00363427
Fmn1	1.22697	0.00988642		Acsm1	-2.6255	0.0036486
Mfi2	1.24543	0.0099131		B2m	1.25703	0.0036486
Stmn2	-1.48723	0.00994804		Gm4907	1.14971	0.00365148
C030014L02	-1.13375	0.00998133		Clca3	-6.20316	0.00365538
Bpifa1	-5.67798	0.00998372		Gen1	1.28208	0.00366977
1700027A23Rik	-1.6942	0.0100021		Pira6	1.22658	0.00368245
Trim21	1.17564	0.0100248		Csta	1.1963	0.00371136
Tcp11	-1.45998	0.0100248		Gprasp2	-1.61515	0.00372863
Rab44	-1.03131	0.0100352		Gm19925	-1.13292	0.00375474
C87414	1.23182	0.0100457		Lag3	1.88008	0.00378786
Decr1	-1.07506	0.0100468		F10	1.35429	0.00382784
Sec14l2	-1.08333	0.0100468		Kank4	-1.08036	0.00384796
2900006A17Rik	-1.61686	0.0100657		C2cd4a	1.05605	0.00385238
Susd3	1.26954	0.0100684		2310015B20Rik	-1.14996	0.00389007
Gm20558	-1.64549	0.0100833		Ndrg2	-1.01199	0.00390339
Sell	1.20869	0.0100833		Gbp8	2.28882	0.00395089
Lpar3	-2.19593	0.0100833		Csprs	1.44532	0.00397739
Cobl	-1.02953	0.010105		Ankrd37	1.25407	0.00400083
Rab20	1.33399	0.0101156		Trim69	1.11687	0.00401602
Spna1	-1.37652	0.0101455		Cd84	1.31388	0.00401602
Ltbp1	1.11013	0.0101852		Jmy	-1.09354	0.0040416
Krtap6-1	1.18629	0.0101852		Pdgfd	-1.01039	0.00406124
Dmrtb1	2.98835	0.010222		Egfbp2	1.06484	0.00411796
Fam47e	-1.84532	0.010235		Orm1	1.69713	0.00413225
Fbln5	-1.36582	0.0103027		Fech	-1.13696	0.00418245
Csn3	1.44006	0.0103353		Gm5226	-4.91393	0.00418749
Snurf	-1.04923	0.0103541		AU021034	-1.10662	0.00420208
Hsd3b4	1.06474	0.0103889		Col2a1	1.30305	0.00420291
2310047K21Rik	-1.02977	0.0104124		Hyal1	-1.10659	0.0042084
Cd55	-1.61349	0.010419		Zc3h12d	1.21698	0.004211
Reln	-1.03657	0.010447		Pik3ap1	1.28921	0.00424795
Nampt	1.46682	0.010447		Pipox	-1.06677	0.0042501
Slc26a9	-1.06314	0.0104471		Bpifb5	-1.8096	0.00425149
Ern1	1.03987	0.010463		Slc41a3	1.02503	0.00425195
Fignl1	1.18625	0.0105264		Cd52	1.17675	0.00425195
Cdh26	-1.39692	0.0105345		Ang2	-1.29214	0.00425468
Hhatl	-1.31447	0.0105417		Rcan2	-1.02535	0.00425754
Asap3	1.22785	0.0105417		Fn1	1.43225	0.0042716
Lrp5	1.25098	0.0105488		9530006C21Rik	-1.07091	0.00428669
Fblim1	1.0237	0.0105488		Wdr27	-1.208	0.00432215
Tprgl	-1.00504	0.0105488		4833431D13Rik	-1.24366	0.0043353
Dcun1d4	-1.18761	0.0105569		Ccl5	1.75172	0.0043364
Fam101b	-1.03428	0.0105613		Cd209a	-1.19347	0.0043381
Col2a1	1.19177	0.0106218		Spic	1.93885	0.00437792
Fcgbp	-1.30419	0.0106375		Fkbp5	1.31198	0.00438912
Dock9	-1.00221	0.0106728		Kcnj10	1.03867	0.00439372
Olfr59	1.00689	0.0106728		Cxcl3	1.9802	0.00441867
2610028H24Rik	-1.25135	0.0107234		Thbs1	1.69144	0.00443716
Il12b	1.40226	0.0107514		Ear10	-1.24614	0.00446265
Casp1	1.33044	0.0107694		Ulbp1	1.12589	0.00458193
Mpp4	-1.20311	0.0108223		Ear1	-1.34189	0.00461192
Pon3	-1.11082	0.0108944		Trib1	1.03248	0.00469471
Itga8	-1.15304	0.0108956		Isg20	1.39625	0.00470352
Ugt3a2	1.10291	0.0108956		Krt17	1.95088	0.00470677
Niacr1	1.097	0.0109148		Lrrc34	-1.17788	0.00477497
Sema7a	1.4938	0.0109291		BC060267	-1.11322	0.00478092
4933403O03Rik	1.46798	0.0109864		Nhedc2	1.2112	0.0047847
Wdr65	-2.2436	0.0109972		BC100530	1.16588	0.00479411
Ankrd6	-1.02546	0.0110046		Sult1d1	-3.66692	0.00480808
Vmn1r47	1.01429	0.0110112		Smpd3	1.98105	0.00483591
Lamp3	-1.06592	0.01104		Rhd	-1.79997	0.00487628
Mt3	1.22665	0.0110731		Gm3161	-1.19716	0.00487826
Tinag	-1.94291	0.0110902		Ptpro	1.10566	0.00489135
Tgm4	-1.12286	0.0111		Cd69	1.72532	0.0048943
Spag6	-1.79722	0.0111224		Rcc1	1.18194	0.00492558
Serpina3k	1.86735	0.0111299		Ctsk	1.06755	0.00493737
Usp29	2.53665	0.0111362		Hat1	1.04363	0.00494538
Cacna1s	1.02678	0.0112007		AW112010	1.38312	0.00494977
Clmn	-1.77992	0.0112012		Mapk10	-1.25449	0.0049803
Ankrd36	1.91329	0.0112012		Spna1	-1.51289	0.00498645
Tln2	-1.20255	0.0112012		2310031A07Rik	1.35843	0.00498724
Cd84	1.37202	0.0112249		C130080G10Rik	-1.13071	0.00503342
2310014L17Rik	1.39897	0.0112441		Mafb	1.44418	0.00505078
Rnf17	1.96499	0.0113044		Slamf6	1.2585	0.00507185
Adamts14	1.2745	0.0113088		Mmp8	2.37402	0.00508021
Olfr1344	1.224	0.0113224		Cd8a	1.83633	0.00511297
6330403K07Rik	-1.17283	0.0113322		Tnfaip6	1.64904	0.00512538
1700001L19Rik	-1.63642	0.0113888		LOC100503888	-1.06488	0.00513369
Gipc3	2.24632	0.0113929		D3Ertd751e	-1.20335	0.00514026
Nr4a1	-1.53384	0.0113929		Mybphl	-1.5282	0.00515712
4930556M19Rik	-1.13263	0.0113929		Ropn1l	-1.03381	0.00516517
Sox2	-1.16411	0.0114452		Tnfrsf18	1.32527	0.00516626
Tekt2	-1.47143	0.0114474		Pla2g2c	-1.15089	0.0051679
Wdfy3	-1.03304	0.0114514		2310007H11Rik	-1.11628	0.00517246
Gpc6	-1.26824	0.0114644		Egr1	-1.66081	0.00519716
Dusp26	-1.64129	0.0114653		Kif6	-1.10447	0.00524462
Ly6g5b	1.46895	0.0115254		Fam166b	-1.1623	0.00526855
Slpi	1.28875	0.0115291		Fcamr	-1.18218	0.00527439
Tmem154	-1.5239	0.011531		Klk1b27	1.30017	0.00527474
Akap6	-1.02689	0.0115588		Cxcl5	2.07045	0.00529398
P2ry13	1.08482	0.0115633		Gpr15	1.55237	0.00536069
2310034G01Rik	-1.31848	0.0115839		Fgl2	1.4019	0.0053721
Padi2	1.25211	0.0115839		Asprv1	1.24761	0.00545789
Ccdc74a	-1.27153	0.0115972		Avpr1a	-1.72034	0.00548551
1700010L04Rik	1.0037	0.0116052		Klra12	1.46136	0.0055129
Il4i1	1.06672	0.0116253		Psmd9	1.02032	0.0055129
Phex	-1.00168	0.0116593		Cwh43	1.39479	0.00552461
Ppap2b	-1.066	0.0116785		Gm5086	1.33243	0.00553938
C85492	-1.0562	0.0116861		Cst7	1.67485	0.00560029
1500026H17Rik	-1.01941	0.0116861		Olfr1198	1.11933	0.00561526
Rgs22	-1.23587	0.011699		H2-M10.2	1.9071	0.0056381
Deptor	-1.04554	0.011719		Tpmt	1.04149	0.00566612
4933404M02Rik	-1.28329	0.011719		Upk1a	-1.25362	0.00568701
Odf3b	-1.58208	0.0117517		Hepacam2	-1.75529	0.00570492
Mettl8	-1.0537	0.0117517		4921506M07Rik	-1.1086	0.00571539
Scrt1	1.06075	0.0117664		9530010C24Rik	-1.03864	0.00572473
Rab3a	-1.17333	0.0117829		Klra17	1.01576	0.0057579
Olfr1170	1.08125	0.0117922		Fst	1.80645	0.00576148
Olfr74	1.17328	0.0118365		Krtap17-1	-1.03255	0.00580557
Slc5a8	-1.73157	0.0118927		Gm8267	-1.02955	0.00581659
1700049L16Rik	1.06751	0.0119231		Il10	1.00742	0.0058519
Rhov	1.12642	0.0119637		Efr3b	1.04743	0.00589894
4930535I16Rik	1.00675	0.0119872		Gpr133	1.48375	0.00591281
Krt75	1.25215	0.0119872		H2-M2	1.74457	0.00599232
Tle2	-1.30001	0.0120488		Cd7	1.0958	0.00602757
Ppil6	-2.00958	0.0121034		Cxcl1	1.44406	0.00602828
Cd59b	-1.03461	0.0121034		Epb4.1	-1.57479	0.00604231
Mcf2l	-1.15903	0.0121276		Stc2	1.04287	0.00604957
Naip2	1.0886	0.0121276		Eomes	1.54542	0.00605203
LOC545261	-1.20937	0.012156		Ptger1	1.05523	0.00605745
Ptafr	1.10963	0.0121713		Dnahc8	-1.11198	0.0061243
Cd68	1.32002	0.0121713		Errfi1	-1.12254	0.00621288
Col8a2	-1.16937	0.0121893		Dll1	1.38102	0.00621827
Kif26a	-1.11476	0.012199		5033418A18Rik	1.06464	0.00622242
3100002H09Rik	1.24106	0.0122015		AI662270	1.26012	0.00629803
Cdca3	1.18491	0.0122615		Il2rb	1.98085	0.00635085
Myh4	-1.71912	0.0122615		Tonsl	1.14074	0.00637408
BC057022	-1.2108	0.012316		Tal2	1.17451	0.00640718
Sybu	-1.04078	0.0123428		Ildr2	1.73928	0.00640886
Ropn1l	-1.06291	0.0123764		Muc1	-1.21201	0.00641526
Pfn1	1.20125	0.0123794		Pim1	1.02818	0.00642463
Syt5	-1.05583	0.0123794		Igdcc3	-1.18577	0.00647512
Hpgds	1.17433	0.012399		Ccl24	3.38687	0.00653563
Gfi1	1.01905	0.0124242		3100002H09Rik	1.47517	0.00656803
Ear1	-1.38297	0.012465		Fcgbp	-1.21049	0.00661433
B2m	1.25366	0.0124816		Tcp11	-1.27224	0.00664442
Gsta1	-1.24234	0.0125122		Cdh26	-1.31964	0.00667103
9530051G07Rik	-1.37994	0.0125218		Tnni3	-1.56682	0.00668566
Mpped2	-1.3374	0.0125404		Ctsw	1.6668	0.00669488
Ahcyl2	-1.18209	0.0125482		Nts	1.15777	0.00669488
Bsg	-1.13847	0.0125501		Lgals7	1.87892	0.00669488
Styxl1	-1.276	0.0125613		Cysltr2	1.41552	0.00669532
Tdo2	1.00155	0.0125708		Gm5483	1.23294	0.00671859
Ckm	-1.22908	0.0125757		1700008A04Rik	-1.55169	0.00680249
Rrp12	1.27453	0.0125805		Nefh	1.1686	0.00680383
Pacrg	-1.01875	0.0125875		2310002F09Rik	-1.17093	0.00684579
Ppara	-1.19246	0.0126048		Krt6b	1.41069	0.00689652
Muc1	-1.71679	0.0126256		Mcoln2	1.56542	0.00690911
Gpt	-1.07437	0.0126548		Cnpy1	-1.61701	0.00693157
Ccnb1	1.2164	0.0126712		Ubash3a	1.11615	0.00695943
Fam166b	-1.90949	0.0126879		Expi	1.51211	0.0070008
Mov10	1.29568	0.0127098		Aebp1	1.55814	0.00702738
Tgif2lx1	2.25974	0.012842		Cyp26b1	-2.68067	0.00705726
Hist1h2ao	1.16435	0.0128835		Kif15	1.2851	0.00706086
Dnahc12	-1.60621	0.012901		Zfp36	-1.05967	0.00715658
Rhbg	-1.09784	0.0129278		Tm4sf5	1.15221	0.00723137
Atxn1	-1.1953	0.0129503		Macrod1	-1.08483	0.00724395
Rspo2	-1.01954	0.0129706		Limch1	-1.08152	0.00726359
Wnt9b	1.04714	0.0129706		Ahsp	-2.09721	0.00732547
Sln	-1.47551	0.0129792		Ldlrad1	-1.35058	0.00733337
CYTB	-1.01577	0.0130642		Kel	-1.50211	0.00733337
Fam82a1	-1.38485	0.0131009		C1qtnf6	1.10449	0.0073377
Cpa3	-1.80707	0.0131986		Clec4n	1.05054	0.00733916
Rcor3	-1.12975	0.013199		6430531B16Rik	-1.03888	0.00746359
Gjb4	1.55958	0.0132227		Slc25a37	-2.00291	0.00746419
Pygm	-1.31567	0.013228		Gm11428	1.90688	0.0076899
Dydc2	-1.06388	0.013228		Hormad1	-1.18392	0.00769009
Ccl3	2.48236	0.013228		Rbmxl2	-1.16109	0.00773041
Tgm5	3.01599	0.0132478		Klrb1f	1.26362	0.00774113
Prdm8	-1.56055	0.0132514		Retnla	1.09648	0.00776169
Got1l1	-1.81039	0.0133872		Upk3a	-1.51577	0.00779107
Adck3	-1.32209	0.013451		Myh6	-1.9102	0.00785129
Gm10914	-1.31207	0.0134544		Rgs1	2.24167	0.00785129
2022-03-04	-1.16833	0.0134558		Ces1c	-1.63064	0.00785803
Mylk4	-1.21615	0.0134558		Iqch	-1.34574	0.00794807
9230110C19Rik	-1.03278	0.013488		Il28b	1.72904	0.00797566
5430414B12Rik	-1.80041	0.0134958		Sytl3	1.24654	0.00802607
Msi2	-1.09264	0.0134958		Chrdl1	-1.46067	0.00804377
Ear10	-1.29378	0.0135027		Fzd3	-1.22963	0.00813159
Pipox	-1.16823	0.0135027		Katnal1	-1.11668	0.00818023
Rbp7	-1.35229	0.0135107		Tnfrsf4	1.21259	0.00819452
Asb14	-1.69201	0.0135745		C2	1.47323	0.00819678
Lrrc4	1.08093	0.0135745		Siglech	1.05252	0.00821149
Lgals3	1.25643	0.0136372		Ear3	-1.49722	0.00833073
AU018091	2.88763	0.0137082		Serpina3i	1.01632	0.0085561
Ppargc1a	-1.3075	0.0137156		Wfdc12	1.5772	0.0085682
Txlnb	-1.74405	0.0137381		Il12b	1.29847	0.00858552
4930485B16Rik	-1.1404	0.0137454		1700024P04Rik	1.64646	0.00862079
Appl2	-1.14389	0.0137743		C4b	1.45146	0.00866769
Cetn4	-1.3796	0.0137955		Gm20558	-1.43859	0.00870058
Selp	1.88092	0.0138734		Cnn1	-1.30272	0.00870315
Rsph1	-1.94008	0.0138734		Prnd	1.20867	0.00879731
Lrp2	-1.68143	0.0139135		Gm8096	1.05283	0.00883111
Efcab3	2.31529	0.0139598		Ear6	-1.12997	0.00888028
Ikzf3	1.15968	0.0139814		Slc7a10	-1.21606	0.0089447
Gpr77	1.09264	0.0139814		Hrh2	1.00494	0.00897141
Bex2	-1.7637	0.0140019		D130017N08Rik	-1.12486	0.00897348
2022-03-10	1.20277	0.014019		Aqp3	1.33985	0.00905162
Cela3b	1.25384	0.0140324		Csf2rb2	1.37989	0.0091054
Nr5a2	1.05359	0.014056		Fasl	1.48931	0.00925484
Tsnaxip1	-1.60938	0.0141232		Wisp1	1.30857	0.00930466
Grp	-1.2314	0.0141232		Fam189a2	-1.03319	0.00933097
Six1	-1.09936	0.0141232		Phgr1	1.77824	0.00933798
Aldoart2	1.00769	0.0141298		Ahcyl2	-1.00002	0.00933798
2300010F08Rik	-1.00131	0.0141562		Esm1	-1.11509	0.00934984
Elmod1	-1.07106	0.014182		Krt79	-1.6179	0.00945456
Dmkn	-1.14467	0.0141883		Efcab5	-1.05617	0.00945763
Olfr1355	1.35669	0.014233		Kcnj3	-1.03129	0.00975943
2410006F04Rik	1.14206	0.014259		C1qtnf3	-1.00969	0.00980277
Lsm14b	1.20399	0.014259		Klra15	1.52869	0.00980277
Krt2	2.80933	0.0142623		Sla2	1.06754	0.00987771
C130080G10Rik	-1.02006	0.0143065		Mug2	-1.21338	0.00999769
Dnahc2	-1.22038	0.0143119		LOC676708	1.95738	0.0100971
Fgl2	1.33417	0.0143151		Cd53	1.05145	0.0101397
Tatdn2	1.66983	0.0143577		Kcnq3	-1.04258	0.0102647
Ephb6	-1.07072	0.0145776		Myh2	6.32047	0.0103494
Crocc	-1.03139	0.0147343		Gm9615	-1.00296	0.0103819
H2-T24	1.84145	0.014841		Casp1	1.16476	0.01042
Dlx6as2	1.41187	0.0149143		Arntl	-1.2974	0.010548
LOC100049077	1.81924	0.0149759		Gjb6	-1.73014	0.0105623
4933402P03Rik	1.40098	0.0149861		F2	-1.21417	0.0105737
Etv1	-1.04071	0.0150549		Ier2	-1.25043	0.0105766
4930524O08Rik	1.93868	0.0150716		Krt13	1.28922	0.0106359
Mep1a	1.24009	0.0150716		Calca	1.1203	0.0106971
Gm4907	1.34358	0.0150993		Alox5	-1.17959	0.0107413
Fam161a	-1.20735	0.0151658		Anxa10	1.81068	0.0108512
Gm8995	1.65355	0.0152643		Gfi1	1.15612	0.0109793
Emid2	-1.20506	0.0152807		Klra22	1.56978	0.011262
2700099C18Rik	1.7245	0.0152807		Epb4.2	-1.18871	0.0113652
Scel	-1.19099	0.0152896		Mycl1	-1.30508	0.0113826
Tmsb10	1.09314	0.0153029		Ces1h	-1.08656	0.011406
[truncated: 423 more rows]

## Sheet: DEG_A_California_04_2009
ID	GSE43764					ID	GSE40091					ID	GSE63786
	3d		5/6d				3d		5/6d				3d		5/6d
	logFC	adj.P.Val	logFC	adj.P.Val			logFC	adj.P.Val	logFC	adj.P.Val			logFC	adj.P.Val	logFC	adj.P.Val
1500035N22Rik	-3.00951	0.00166275	-3.97877	0.00103291		1500035N22Rik	-1.88831	0.000273998	-1.70272	7.14e-05		1500035N22Rik	-2.27359	0.000348634	-2.26868	0.000122936
1700012B09Rik	-1.46634	0.000865956	-2.79175	0.00567001		1700012B09Rik	-1.31038	0.000304797	-1.35196	0.000126293		1700012B09Rik	-2.03966	0.00223234	-1.73872	0.00215795
2410066E13Rik	-2.49016	0.00281642	-2.59169	0.00245247		2410066E13Rik	-1.05197	4.86e-05	-1.3409	0.000501154		2410066E13Rik	-1.82783	0.00130182	-2.18581	0.000107223
2610002D18Rik	3.62779	0.00755549	4.33381	0.00110772		2610002D18Rik	1.10527	0.0040224	1.89897	0.00023372		2610002D18Rik	1.12814	0.0296599	2.67941	0.000208539
9130017N09Rik	3.96405	0.00115966	2.9474	0.00263305		9130017N09Rik	1.76454	4.9e-05	1.88456	0.000657178		9130017N09Rik	2.28537	0.000962902	2.29712	0.000367453
9930023K05Rik	4.16821	0.00154748	3.12956	0.00101278		9930023K05Rik	2.13024	3.48e-05	1.69491	0.000133476		9930023K05Rik	3.68202	0.000105835	3.23795	0.000677006
A430084P05Rik	2.58532	0.00766904	2.83973	0.000417226		A430084P05Rik	1.20355	0.000325115	1.58229	7.35e-05		A430084P05Rik	2.3585	0.00107026	2.36157	0.000255286
A530032D15Rik	2.29974	0.00803348	2.17349	0.000546733		A530032D15Rik	1.2926	0.000121526	2.00346	6.26e-05		A530032D15Rik	2.03734	0.00112161	2.04929	0.00186176
Aass	-2.68108	0.00654638	-3.50641	0.00397894		Aass	-1.22167	0.000394957	-1.3072	0.00027339		Aass	-1.81782	0.00108074	-2.04649	0.00024909
Abcg5	-1.79018	0.0178477	-1.97146	0.00343273		Abcg5	-2.83688	4.1e-06	-1.01138	0.00063057		Abcg5	-1.56171	0.00344007	-1.39443	0.00185258
AI607873	4.64391	0.00126617	4.74718	0.000431593		AI607873	3.00161	1.31e-06	3.0557	2.55e-05		AI607873	4.47201	0.000108315	4.12985	0.000100202
Aif1	3.09833	0.00254654	2.59529	0.00101278		Aif1	1.53556	5.19e-05	2.35493	3.61e-05		Aif1	3.84051	9.16e-05	3.61829	0.000122936
Apobec1	2.36422	0.00430908	2.38098	0.000611962		Apobec1	1.31035	8.3e-05	2.1221	0.000257924		Apobec1	2.18833	0.000434647	1.78915	0.000210069
Apod	5.15868	0.000365119	2.55942	0.00039232		Apod	2.65136	2.94e-06	3.21884	1.68e-05		Apod	5.35961	0.000117189	3.7585	0.000561273
Apof	2.45946	0.00835156	1.76117	0.00184564		Apof	-4.0073	2.95e-06	-1.2508	0.00533094		Apof	1.33285	0.00950703	1.36436	0.0114996
Apol6	3.83962	0.00504771	3.84349	0.00981561		Apol6	1.82845	1.01e-05	2.00552	6.95e-05		Apol6	3.9619	0.000360299	2.80501	0.00190854
Apol9a	5.91205	0.000721825	4.42792	0.000342134		Apol9a	2.43677	6.65e-06	2.73001	3.66e-05		Apol9a	4.67616	0.000364709	4.29542	0.000561882
Apol9b	6.61856	0.000754702	5.2144	0.00031188		Apol9b	2.39367	4.11e-06	3.16939	2.19e-05		Apol9b	4.63389	8.87e-05	4.43108	0.000160349
Areg	3.94138	0.00154513	2.81231	0.000521422		Areg	3.00614	2.95e-06	1.84215	0.000126293		Areg	2.99738	0.000198237	3.14646	0.000273864
Asgr1	-3.37846	0.000815526	-3.23554	0.00225301		Asgr1	-2.9419	2.56e-06	-2.41547	6.46e-05		Asgr1	-1.37119	0.00156998	-1.98593	0.000197254
Atf3	4.66509	0.000887452	2.91505	0.000834627		Atf3	1.62311	2.98e-05	1.71188	6.18e-05		Atf3	2.06491	0.00862227	1.63667	0.0162157
Aurka	1.17479	0.00782907	2.76234	0.000576384		Aurka	1.72336	7.11e-05	2.33586	3.68e-05		Aurka	1.4796	0.0075188	2.8034	0.000100202
AW112010	1.4093	0.00973751	1.29287	0.0388658		AW112010	1.10107	0.0018521	1.38896	0.00108872		AW112010	1.74292	0.000869312	1.38312	0.00494977
Batf2	2.80241	0.00796669	3.4608	0.00397697		Batf2	1.7177	6.06e-05	2.36428	5.42e-05		Batf2	2.68799	0.00136163	2.45342	0.00105474
BC013712	1.87524	0.014797	2.10791	0.00093145		BC013712	1.27992	2.52e-05	1.59669	0.00020852		BC013712	1.7902	0.00111636	1.65008	0.00163511
Bcl2l15	4.79783	0.000846927	5.16179	0.000597675		Bcl2l15	1.06267	0.000518724	1.15019	0.000438656		Bcl2l15	2.11933	0.000621522	1.7222	0.00173182
Bcl3	1.439	0.00197859	1.93638	0.00104493		Bcl3	1.4005	0.000571378	1.30638	0.00148868		Bcl3	1.50672	0.000695472	1.25007	0.000340173
Bst2	4.20729	0.000584199	2.95274	0.000331133		Bst2	2.26171	4.15e-05	2.61055	3.38e-05		Bst2	2.81849	0.000192962	2.7797	0.000141857
Btbd17	2.97318	0.000771041	2.81605	0.00387068		Btbd17	1.92413	0.000248273	1.53481	0.00027339		Btbd17	1.83271	0.00395821	1.75217	0.000385356
Car13	3.73675	0.00232061	3.37233	0.00029494		Car13	1.31588	0.000222729	1.70125	5.25e-05		Car13	2.95157	0.000564166	2.73971	0.000183232
Casp4	1.54096	0.0153233	1.54292	0.00183716		Casp4	1.04485	0.000214708	1.23136	0.000988822		Casp4	2.30069	0.000229537	1.96132	0.000531228
Ccl11	1.1345	0.0193861	4.328	0.00641806		Ccl11	1.6831	0.0001238	1.03485	0.000719771		Ccl11	2.53142	9.49e-05	3.23513	0.00119679
Ccl12	4.17229	0.00184913	4.73709	0.000372245		Ccl12	3.18097	2.85e-06	3.9993	1.83e-05		Ccl12	4.348	0.00020631	4.07569	0.000245858
Ccl2	6.89919	0.00115966	6.47377	0.000518586		Ccl2	5.31311	1.28e-07	4.56148	7.76e-06		Ccl2	6.76387	8.19e-05	6.03909	0.000108884
Ccl3	3.15219	0.00781623	3.26577	0.000508247		Ccl3	2.58365	2.56e-06	2.19923	0.000235505		Ccl3	2.48236	0.013228	1.86314	0.0363318
Ccl4	4.76789	0.00224741	4.91407	0.000119516		Ccl4	3.4712	1.03e-06	3.38692	3.02e-05		Ccl4	4.87823	4.49e-05	4.37378	0.000314147
Ccl7	7.52504	0.00127974	7.06456	0.000372081		Ccl7	5.52378	1.83e-07	5.36023	7.76e-06		Ccl7	7.04989	3.48e-05	5.99773	0.000123061
Ccne1	1.71232	0.00290414	3.46086	0.000485452		Ccne1	1.34578	3.63e-05	2.0786	5.4e-05		Ccne1	1.63625	0.00125418	2.32892	0.000122936
Ccr5	3.38604	0.00236424	4.1901	0.000258276		Ccr5	1.85637	6.65e-06	3.05704	1.62e-05		Ccr5	3.64273	9.6e-05	3.40103	0.000107223
Cd177	3.28601	0.00166275	2.7396	0.0016944		Cd177	2.7517	0.000573689	3.35089	1.25e-05		Cd177	1.70565	0.0263305	2.53559	0.000128897
Cd207	-2.93715	0.00288659	-4.91086	0.00326614		Cd207	-1.0309	0.00027685	-1.30226	0.000140435		Cd207	-2.23662	0.000198237	-2.24733	0.000207777
Cd274	3.32705	0.00357243	3.53244	0.00237096		Cd274	1.93682	6.54e-06	2.10849	0.000108708		Cd274	3.01658	0.00232574	2.34956	0.00126026
Cd86	1.48453	0.0264413	1.10807	0.00577103		Cd86	1.18781	3.66e-05	1.45626	0.000175205		Cd86	1.61276	0.00174255	1.79578	0.00123835
Cdca5	1.48893	0.00873579	2.91974	0.000722566		Cdca5	1.7836	0.000432188	2.47994	4.19e-05		Cdca5	1.44384	0.0069473	2.66539	0.000100202
Ces1f	-5.55284	0.00465836	-2.61544	0.0208091		Ces1f	-2.1031	1.2e-05	-1.93584	4.24e-05		Ces1f	-3.8305	0.000849893	-2.03278	0.030317
Cfb	3.85625	0.00185653	3.45493	0.000224006		Cfb	1.92785	4.9e-05	2.88898	2.21e-05		Cfb	4.14549	3.2e-05	3.65705	0.000107223
Ch25h	3.67717	0.00269409	4.75487	0.000408413		Ch25h	3.47015	1.3e-06	3.15275	4.24e-05		Ch25h	3.19484	0.000233321	2.80141	0.000107871
Chl1	2.32105	0.025391	5.19311	0.00106287		Chl1	1.20974	2.53e-05	1.87212	0.000267025		Chl1	4.46339	8.19e-05	4.97717	0.000122936
Cmpk2	4.83436	0.00132191	3.29452	0.000518586		Cmpk2	3.1363	1.75e-06	2.2422	2.99e-05		Cmpk2	3.21983	8e-05	3.13264	0.000161649
Cngb3	6.4412	0.000771041	4.90169	0.00110772		Cngb3	1.22793	0.000136881	1.72942	0.000112623		Cngb3	3.8502	2.2e-05	3.21069	0.000100202
Col2a1	1.61662	0.034485	1.66882	0.0123113		Col2a1	1.90222	0.0333484	2.04918	0.0469565		Col2a1	1.19177	0.0106218	1.30305	0.00420291
Cxcl1	2.83588	0.000865956	3.53723	0.00229031		Cxcl1	3.5701	1.67e-06	1.65794	0.00310306		Cxcl1	2.58645	0.000752168	1.44406	0.00602829
Cxcl10	8.90908	0.00093131	8.59346	0.000320097		Cxcl10	6.14683	3.57e-07	5.14494	6.2e-06		Cxcl10	7.02267	7.52e-05	6.73672	0.000100202
Cxcl13	3.38091	0.00373319	4.82111	0.00064707		Cxcl13	2.17782	1.14e-05	2.6663	4.24e-05		Cxcl13	5.18622	0.00174255	5.35489	0.00188923
Cxcl3	3.04389	0.00305672	4.29052	0.00566916		Cxcl3	1.70391	0.000633405	1.02514	0.000893504		Cxcl3	2.29534	0.00125246	1.9802	0.00441867
Cxcl9	5.37294	0.0028712	5.20804	0.00632051		Cxcl9	3.40689	5.62e-06	4.74681	1.15e-05		Cxcl9	6.35325	6.41e-05	5.94662	0.000107466
Cyp2a4	-2.30464	0.0121018	-2.95023	0.0392179		Cyp2a4	-1.29127	3.48e-05	-1.46009	0.000305736		Cyp2a4	-4.13652	0.00548874	-4.95988	0.000329003
Cyp4f15	-3.41902	0.00714486	-5.50694	0.000211048		Cyp4f15	-1.48924	7.11e-06	-1.36128	0.000220723		Cyp4f15	-3.24072	0.00720389	-4.19715	0.000218317
D14Ertd668e	4.04788	0.000819698	2.9403	0.000466868		D14Ertd668e	2.61827	3.83e-06	2.70343	3.12e-05		D14Ertd668e	3.75506	5.64e-05	3.68767	0.000123061
Darc	4.06705	0.00152697	3.96615	0.00503937		Darc	1.20723	0.00117727	1.16926	0.000655395		Darc	3.08829	0.000731065	2.75911	0.00126609
Daxx	2.55229	0.00289142	2.13382	0.000397303		Daxx	1.55387	7.11e-05	1.3266	0.000260776		Daxx	2.01362	0.000206635	1.80248	0.000337421
Dck	2.21889	0.00675663	2.41894	0.000931457		Dck	1.29073	2.16e-05	1.36269	0.000154039		Dck	1.8291	0.00153212	2.03057	0.000207777
Ddx4	4.39858	0.00954862	4.33634	0.00113762		Ddx4	2.02999	9.43e-06	1.46086	0.000822435		Ddx4	1.49394	0.00751429	1.45207	0.0135382
Ddx58	2.59363	0.000865956	1.9675	0.000322303		Ddx58	2.0262	5.93e-05	1.79445	0.000120761		Ddx58	1.55411	0.00107845	1.79273	0.000247035
Ddx60	4.71276	0.00189621	3.1455	0.00701354		Ddx60	2.56175	4.2e-06	2.44947	0.000102349		Ddx60	2.6373	0.000528782	2.52018	0.00030546
Dhx58	4.05338	0.000771041	3.48839	0.000515098		Dhx58	2.89227	1.01e-06	2.80195	1.62e-05		Dhx58	3.21539	7.52e-05	3.06339	0.000130529
Dio2	2.3158	0.0134272	4.11966	0.001702		Dio2	1.5688	0.00028579	1.11915	0.00060353		Dio2	2.4358	0.00135715	1.38028	0.012385
E330016A19Rik	1.6457	0.00782285	1.79795	0.001487		E330016A19Rik	1.13661	4.95e-05	1.17393	0.000374046		E330016A19Rik	1.57141	0.00180548	1.66313	0.00019087
Eif2ak2	2.72989	0.000968807	2.39101	0.000253718		Eif2ak2	1.97375	4.8e-06	1.61604	0.00027339		Eif2ak2	2.51063	8e-05	2.29308	0.000122936
Epsti1	3.11551	0.00121446	2.36571	0.00288803		Epsti1	1.98275	6.18e-06	2.21311	3.55e-05		Epsti1	2.94307	0.000261386	2.68077	0.000815484
Exo1	1.6128	0.00622839	3.18546	0.000417226		Exo1	1.30757	0.000563401	1.86951	4.24e-05		Exo1	1.14151	0.00328514	2.45684	0.000107871
F2	-2.16169	0.00204079	-2.43591	0.00215466		F2	-5.39973	8.73e-07	-2.26439	0.000154039		F2	-1.7374	0.00153212	-1.21417	0.0105737
Fabp1	-3.25766	0.0311573	-3.18143	0.0079557		Fabp1	-2.50572	6.76e-06	-2.20595	3.15e-05		Fabp1	-2.97504	0.000434693	-3.06012	0.000421374
Fam83e	-1.04292	0.0115042	-1.40939	0.0472538		Fam83e	1.38816	0.000327837	1.00995	0.000931557		Fam83e	-1.40919	0.021092	-1.697	0.00192011
Fcer1g	2.12161	0.00741109	2.65347	0.000515991		Fcer1g	1.00561	0.000289096	1.10329	0.000934479		Fcer1g	2.19256	0.000364709	1.83873	0.000344295
Fcgr1	4.78285	0.00155965	4.84842	0.000186667		Fcgr1	3.39805	8.73e-07	3.5341	8.56e-06		Fcgr1	4.72507	1.58e-05	4.47964	0.000100202
Fcgr4	3.87796	0.0025837	4.87505	0.000471201		Fcgr4	1.32227	4.5e-05	2.34514	4.24e-05		Fcgr4	3.25116	0.000198237	2.73592	0.000306197
Fmo3	-4.08028	0.00433096	-4.65171	0.00367876		Fmo3	-2.63963	1.93e-06	-2.82156	1.61e-05		Fmo3	-3.77879	0.00208598	-4.96154	0.000933138
Gbp2	3.16115	0.00294576	3.0386	0.00236658		Gbp2	1.65714	4.11e-06	2.05624	6.25e-05		Gbp2	2.47766	0.00292917	2.2814	0.000805417
Gbp3	3.93168	0.00104505	3.30767	0.00220307		Gbp3	2.19338	1.62e-06	2.34438	8.18e-05		Gbp3	2.63236	0.000320702	2.55479	0.000338535
Gbp5	4.05828	0.0020062	4.10088	0.0017582		Gbp5	2.47631	3.52e-06	3.03585	5.37e-05		Gbp5	3.17155	0.000434693	3.09553	0.000620285
Gbp7	2.4095	0.00530949	2.59866	0.00506545		Gbp7	1.5367	0.000101078	1.71012	0.000148276		Gbp7	1.42113	0.0245045	1.62552	0.00191455
Gbp9	1.74009	0.00971857	2.02074	0.00834972		Gbp9	1.245	2.78e-05	1.41141	0.000374046		Gbp9	1.7363	0.00351972	1.8457	0.00127525
Gch1	2.14563	0.00184024	1.91025	0.00120337		Gch1	1.44502	0.000831119	1.27219	0.000345628		Gch1	1.46692	0.00837502	1.70157	0.000210069
Gm12250	3.10922	0.00490255	3.54002	0.0055726		Gm12250	1.69523	0.000133584	2.1797	3.02e-05		Gm12250	2.72729	0.00791512	2.73246	0.000954277
Gm14446	5.14194	0.00191194	3.90906	0.00029494		Gm14446	3.28118	9.43e-07	2.94975	3e-05		Gm14446	4.0819	0.000217336	3.7213	0.000367475
Gpr171	1.18373	0.0316229	1.63899	0.0154409		Gpr171	1.06467	0.000136881	1.50857	0.000258049		Gpr171	1.78487	0.00165875	1.78705	0.00250369
Gpr84	3.35596	0.00184913	4.75396	0.000518586		Gpr84	1.2749	0.000982207	1.42154	0.00121481		Gpr84	2.10863	0.000192962	2.21479	0.000106772
Gzmb	2.91246	0.00639957	3.61387	0.0109096		Gzmb	1.77371	1.64e-05	2.89494	1.62e-05		Gzmb	2.55875	0.00219501	3.46482	0.000935567
Hepacam2	-2.80818	0.00113508	-3.8976	0.000397303		Hepacam2	-1.0411	0.00028579	-1.2487	0.000704323		Hepacam2	-1.95474	0.00873619	-1.75529	0.00570492
Herc6	3.81341	0.00121446	3.05911	0.000925702		Herc6	1.99157	2.96e-06	2.38912	7.46e-05		Herc6	2.5933	0.00141148	2.1658	0.000345632
Hmgcs2	-3.72368	0.0120109	-4.3767	0.000431593		Hmgcs2	-1.12315	0.000683409	-1.19497	0.00121184		Hmgcs2	-2.72464	0.000492866	-2.40845	0.000435073
Hpse	1.51865	0.0224611	1.34266	0.0241062		Hpse	1.17707	0.000173043	1.39515	0.000158544		Hpse	1.86386	0.000656799	1.94112	0.000848316
Hsh2d	1.94913	0.00314232	1.41408	0.00335951		Hsh2d	1.6988	2.01e-05	1.47052	0.00012533		Hsh2d	1.87325	0.000444336	1.81892	0.000987891
I830012O16Rik	5.18114	0.000721825	3.46243	0.000119516		I830012O16Rik	3.48231	4.73e-05	2.85963	0.000120761		I830012O16Rik	4.51419	5e-05	4.03302	0.000100202
Ido1	4.5012	0.00288841	4.25527	0.0333875		Ido1	1.47686	8.17e-05	3.30118	2.27e-05		Ido1	4.06658	0.000507277	3.41883	0.00253072
Ifi203	1.41302	0.0243947	1.09162	0.024999		Ifi203	1.11374	0.0001238	1.15217	0.00153177		Ifi203	1.28652	0.00684514	1.35258	0.00324825
Ifi204	4.51121	0.00242009	4.44308	0.000119516		Ifi204	2.13678	4.11e-06	2.40166	3.02e-05		Ifi204	3.99209	3.79e-05	3.85248	0.000128897
Ifi27l2a	3.90569	0.00093131	3.29381	0.000688916		Ifi27l2a	1.93838	3.14e-05	2.11341	3.61e-05		Ifi27l2a	3.47077	0.00012571	3.57011	0.000131223
Ifi44	5.71372	0.000721825	4.74144	0.00029494		Ifi44	3.98498	1.83e-07	3.80569	1.93e-05		Ifi44	4.46661	3.79e-05	4.37433	0.000122936
Ifi47	2.66647	0.00347533	3.01515	0.00292019		Ifi47	1.78194	4.11e-06	1.92452	4.24e-05		Ifi47	2.06656	0.00359969	2.01257	0.00115088
Ifih1	3.2327	0.00126617	2.50782	0.000518586		Ifih1	1.72999	8.09e-06	1.51056	0.000241506		Ifih1	2.01011	0.00218534	2.07752	0.000256283
Ifit1	5.67512	0.000584199	4.90571	0.000234465		Ifit1	4.23213	1.83e-07	3.62127	7.76e-06		Ifit1	4.25111	0.000172097	4.04284	0.000100202
Ifit2	5.19646	0.00154748	4.27295	0.0016467		Ifit2	3.27465	1.85e-06	2.6774	2.83e-05		Ifit2	4.17535	0.000596515	3.81563	0.000107871
Ifit3	5.22074	0.000584199	4.02361	0.000119516		Ifit3	3.36103	2.33e-06	3.03585	1.83e-05		Ifit3	4.29817	1.58e-05	3.9899	0.000100202
Ifitm3	2.27649	0.000942294	1.88653	0.000597675		Ifitm3	1.4714	3.22e-05	1.25115	0.00027339		Ifitm3	2.05667	0.000198237	1.65665	0.000180207
Ifnb1	11.1793	0.000682628	9.92753	0.000342134		Ifnb1	3.66022	4.72e-06	3.86481	7.76e-06		Ifnb1	7.03948	1e-05	5.5658	0.000123061
Ifng	2.21126	0.0297353	3.24696	0.0255076		Ifng	1.46648	0.00018024	3.01	4.41e-05		Ifng	3.26669	0.000645062	3.83582	0.00107753
Igtp	3.74496	0.00163844	4.02635	0.00383294		Igtp	2.13143	2.13e-06	3.00874	1.04e-05		Igtp	2.64047	0.00128494	2.78036	0.000411429
Iigp1	3.27395	0.00184024	3.56953	0.00387447		Iigp1	1.9539	4.9e-06	2.53135	3.45e-05		Iigp1	3.1257	0.000448071	2.88257	0.00018111
Il18bp	4.63137	0.00139342	3.94323	0.000391594		Il18bp	2.35647	3e-06	2.88015	1.83e-05		Il18bp	4.33231	7.33e-05	3.75192	0.000107466
Il1r2	5.89443	0.00202201	6.86613	0.00149852		Il1r2	1.27385	0.000367802	1.68832	0.00027339		Il1r2	3.45271	8.19e-05	2.77858	0.000340173
Il1rn	4.42006	0.00224741	4.45581	0.00114627		Il1rn	2.43147	3.61e-06	2.01215	3.03e-05		Il1rn	3.04944	0.000147994	2.75652	0.000656967
Il6	8.0207	0.000721825	8.05418	0.001294		Il6	4.57124	1.15e-06	2.70188	3.01e-05		Il6	4.72061	0.000286927	3.37168	0.000664208
Irf7	6.37026	0.000721825	5.74936	5.24e-05		Irf7	4.5527	2.33e-06	4.78133	3.78e-06		Irf7	5.42681	1.58e-05	5.25128	0.000100202
Irf9	1.55194	0.00121446	1.08364	0.000830594		Irf9	1.35896	1.46e-05	1.42785	0.000141276		Irf9	1.37561	0.00138361	1.32735	0.000337421
Irg1	7.31111	0.00120356	7.84392	0.000103865		Irg1	5.60116	1.83e-07	3.2398	4.19e-05		Irg1	6.96239	3.2e-05	6.57183	0.000107871
Irgm1	3.445	0.00121446	3.52001	0.00125435		Irgm1	2.30788	1.03e-06	2.60369	3.02e-05		Irgm1	2.80055	0.000752426	2.69238	0.00019087
Irgm2	2.92857	0.00182118	3.13777	0.00390417		Irgm2	1.64285	1.35e-05	2.25453	3.01e-05		Irgm2	1.81043	0.00154237	1.73026	0.00106875
Isg15	6.26208	0.000584199	5.27538	0.000224006		Isg15	4.34357	8.73e-07	4.23995	4.07e-06		Isg15	5.34982	4.53e-05	5.43258	0.00011726
Isg20	2.9325	0.00139961	1.30605	0.00137605		Isg20	2.09584	1.54e-05	1.62202	9.98e-05		Isg20	1.61495	0.00595167	1.39625	0.00470352
Klk1	2.73855	0.00422696	2.76492	0.00235967		Klk1	1.09123	0.000913407	1.54475	0.000772		Klk1	1.66659	0.00363016	1.70857	0.00300296
Klrk1	2.62226	0.00891193	2.68399	0.00603376		Klrk1	1.19127	0.00192668	2.0137	0.00198906		Klrk1	2.59758	0.000277066	2.37936	0.00251369
Kng1	2.64782	0.00121446	4.22547	0.00068077		Kng1	-4.14868	2.18e-06	-1.3305	0.00272343		Kng1	1.14501	0.00401177	1.28484	0.00118424
Krt85	1.54905	0.000815526	1.58474	0.00158478		Krt85	1.09232	0.0008931	1.37587	0.0121943		Krt85	2.23478	0.00041583	1.45269	0.00160252
Lag3	3.35072	0.00215017	2.59563	0.00136399		Lag3	1.35858	0.000135205	2.19116	3.01e-05		Lag3	2.45485	0.000775281	1.88008	0.00378786
Lcn2	4.14902	0.000771041	3.5022	0.00031188		Lcn2	2.73943	0.000120833	3.03329	1.93e-05		Lcn2	3.48942	9.99e-05	2.29119	0.000296285
Lgals3bp	3.60002	0.000584199	2.99732	0.000205355		Lgals3bp	2.39704	9.5e-06	2.51305	7.37e-05		Lgals3bp	2.52338	0.000360299	2.56166	0.00011726
Lgals9	3.04323	0.000969948	2.62317	0.00068077		Lgals9	1.56935	0.000325157	1.19383	0.00169492		Lgals9	1.80925	0.00328817	2.26092	0.000107466
Lhx2	5.9073	0.00189621	4.80051	0.00101278		Lhx2	1.63745	0.00256112	1.12979	0.000890488		Lhx2	3.29753	0.000286927	3.1934	0.000667851
Lilrb4	2.55256	0.00356614	3.18369	0.000415495		Lilrb4	1.29008	5.19e-05	1.35547	0.000997732		Lilrb4	2.91059	0.0042748	2.8453	0.00165632
Ly6a	2.2104	0.00452623	1.75507	0.00718422		Ly6a	1.51515	7.46e-06	1.3537	0.000369704		Ly6a	1.44335	0.00157225	1.15904	0.000876874
Ly6e	2.12053	0.00171959	1.70381	0.00270257		Ly6e	1.96379	4.03e-06	1.77536	0.000252949		Ly6e	1.09454	0.00176352	1.04529	0.000610662
Ly6f	5.72143	0.000771041	3.33112	0.00111377		Ly6f	2.96949	0.0204215	3.79342	0.00220606		Ly6f	3.53902	0.000286927	2.40811	0.00142198
Ly6i	4.74487	0.000771041	2.70812	0.00233614		Ly6i	1.55371	7.75e-06	1.60662	6.85e-05		Ly6i	2.02296	0.00170125	1.70092	0.000150223
Mab21l3	2.17553	0.0017795	2.29953	0.00204236		Mab21l3	1.54113	3.5e-05	1.43467	0.000471644		Mab21l3	1.20771	0.00232574	1.11412	0.000815439
Mcm10	1.92691	0.00197859	2.70525	0.000893138		Mcm10	1.73422	3.48e-05	2.47364	3.01e-05		Mcm10	1.10248	0.0231988	2.31026	0.000112906
Mefv	3.41985	0.00273238	4.20893	0.000496557		Mefv	1.95676	4.11e-06	1.76014	0.00041336		Mefv	3.58137	2.2e-05	3.12663	0.000122936
Mitd1	2.05351	0.00176216	1.76987	0.00031188		Mitd1	1.41172	8.74e-05	1.17299	0.000375748		Mitd1	1.44084	0.00695429	1.67855	0.000566548
Mlkl	3.90234	0.00206874	3.44546	0.000331516		Mlkl	1.82797	4.08e-06	2.10846	3.4e-05		Mlkl	3.17878	7.7e-05	2.65528	0.000100202
Mnda	4.38101	0.00172601	3.5323	0.000726066		Mnda	1.69707	7.37e-06	1.72075	0.000148276		Mnda	3.41352	8.19e-05	2.91891	0.0001833
Ms4a6c	3.77956	0.00196776	3.88282	0.00031188		Ms4a6c	1.75161	2.03e-05	2.14446	6.61e-05		Ms4a6c	3.60169	0.000621638	3.38002	0.000123061
Ms4a6d	4.37966	0.00166275	4.78726	0.000224006		Ms4a6d	2.61661	2.94e-06	2.67544	1.62e-05		Ms4a6d	3.82409	0.000336551	3.77978	0.000100202
Ms4a7	3.30656	0.00279303	2.97164	0.00253541		Ms4a7	1.47045	0.000231075	2.72328	1.93e-05		Ms4a7	4.00448	6.41e-05	4.11005	0.000206705
Msr1	3.9502	0.00283203	4.94167	0.000388489		Msr1	1.76596	1.38e-05	2.56184	0.000110811		Msr1	3.97613	0.000336551	3.36392	0.000242428
Mthfd2	3.40979	0.00114953	3.05313	0.00015565		Mthfd2	1.36286	5.07e-05	1.66253	0.00023372		Mthfd2	2.57286	0.000172097	2.08556	0.000107466
Mx1	6.7713	0.000771041	5.9479	0.000342134		Mx1	3.6436	7.74e-07	3.01193	3.4e-05		Mx1	5.35963	3.42e-05	5.29224	0.000107871
Mx2	5.19865	0.000696352	3.80226	0.000515098		Mx2	4.22947	3.57e-07	3.6411	2.33e-05		Mx2	4.14467	3.1e-05	3.85216	0.000108884
Myd88	1.51032	0.00424535	1.63692	0.000515991		Myd88	1.0474	9.42e-05	1.02222	0.000410895		Myd88	1.33726	0.00124572	1.03652	0.000953579
Nt5c3	2.24437	0.00342146	1.51838	0.00224983		Nt5c3	1.18455	0.000129709	1.00219	0.000519428		Nt5c3	1.53312	0.00297278	1.58041	0.00199499
Nts	1.36254	0.00635908	1.40068	0.0225211		Nts	1.08874	0.000723352	1.79681	6.42e-05		Nts	1.87768	0.00414784	1.15777	0.00669488
Oas1a	5.19912	0.000721825	4.29896	0.000392176		Oas1a	3.34752	2.03e-06	3.55471	7.76e-06		Oas1a	4.46272	1.58e-05	4.50545	0.000100202
Oas1f	5.15502	0.000682628	4.25223	0.000342134		Oas1f	3.3518	1.11e-06	3.47166	3.81e-05		Oas1f	4.30104	1.58e-05	4.30495	0.000100202
Oas2	4.83034	0.000815526	4.46422	0.000331183		Oas2	3.28735	9.86e-07	3.16677	0.000120761		Oas2	4.28001	0.000136822	4.20522	0.000230225
Oas3	6.35546	0.00120356	6.17809	0.000119516		Oas3	3.5936	9.34e-07	3.58271	8.56e-06		Oas3	4.7855	3.2e-05	4.91757	0.000100202
Oasl1	6.74386	0.000771041	5.6458	0.000186667		Oasl1	4.72164	8.38e-07	4.09982	1.09e-05		Oasl1	5.33767	1.58e-05	5.06576	0.000107871
Oasl2	4.4802	0.000475376	3.51882	0.00039232		Oasl2	3.15437	5.47e-07	3.01046	2.27e-05		Oasl2	3.1967	0.000109839	3.10672	0.000120505
Parp10	1.66321	0.00233506	1.46155	0.00274355		Parp10	1.16361	0.000494174	1.2806	0.000263727		Parp10	1.30148	0.00162414	1.23412	0.000607122
Parp11	2.24896	0.00436231	1.96519	0.00849177		Parp11	1.35677	2.16e-05	1.46975	0.000231161		Parp11	1.70665	0.000624468	1.57951	0.00088672
Parp12	2.69631	0.00121446	2.05536	0.00198229		Parp12	1.62671	2.16e-05	1.3409	0.000176872		Parp12	1.62224	0.00616478	1.88467	0.000372077
Parp14	2.33333	0.00158743	2.18734	0.00085589		Parp14	1.67714	1.77e-05	1.40265	0.000349316		Parp14	1.40761	0.00253616	1.32818	0.0010406
Parp9	2.45107	0.000969948	2.14517	0.00110222		Parp9	1.6919	2.53e-05	1.73272	0.000126293		Parp9	1.97349	0.000497601	1.78379	0.000475882
Pdcd1	1.70476	0.00890477	1.19269	0.0395607		Pdcd1	1.21369	0.000973277	2.62239	1.73e-05		Pdcd1	2.25139	0.000786173	2.30791	0.00135422
Phf11	4.07337	0.00151567	3.10108	0.000431593		Phf11	2.763	7.46e-06	2.62429	2.79e-05		Phf11	3.35824	0.000256116	3.1208	0.000324346
Pipox	-3.1993	0.000969948	-2.63627	0.000638432		Pipox	-2.28659	2.65e-05	-1.01209	0.00801651		Pipox	-1.16823	0.0135027	-1.06677	0.0042501
Plac8	3.34754	0.00189621	3.33701	0.000503588		Plac8	1.59555	8.55e-06	1.58958	0.000102783		Plac8	2.66172	0.00020631	2.44694	0.000289636
Pml	1.51359	0.00412745	1.03025	0.00255504		Pml	1.11246	0.000389713	1.04154	0.000888442		Pml	1.29077	0.0013525	1.27031	0.000987001
Pon1	-3.79988	0.01478	-5.20666	0.000205355		Pon1	-2.99258	9.31e-07	-2.34428	1.93e-05		Pon1	-3.36075	0.000609785	-4.33126	0.000451294
Pou3f1	2.68353	0.00875752	1.26878	0.00464		Pou3f1	1.46746	0.00038533	1.2818	0.000347792		Pou3f1	4.38591	0.000207687	4.27004	0.000288412
Ppa1	2.80222	0.000969948	2.77036	0.000224006		Ppa1	1.2707	0.000294301	1.63315	9.89e-05		Ppa1	1.75528	0.00236951	1.92204	0.000111275
Prss22	5.10675	0.00121977	4.35901	0.000221281		Prss22	2.23412	5.14e-05	2.00401	0.000497143		Prss22	3.78464	8.19e-05	3.07698	0.000272146
Psapl1	1.66115	0.00512519	1.75782	0.00445163		Psapl1	1.06914	0.00372119	2.17751	6.35e-05		Psapl1	1.83756	0.000684355	1.80265	0.00048464
Pyhin1	3.23491	0.00365918	3.56299	0.00015565		Pyhin1	2.31582	5.59e-06	2.41472	3e-05		Pyhin1	3.39318	5.9e-05	3.3841	0.000345554
Rad51	1.66692	0.00217605	2.43542	0.00104493		Rad51	1.50056	5.77e-05	2.0511	4.84e-05		Rad51	1.27409	0.0168089	2.54005	0.000122936
Retnla	2.39561	0.0118148	2.61397	0.00203025		Retnla	2.81733	0.00743695	3.0208	2.33e-05		Retnla	1.7928	0.00138361	1.09648	0.00776169
Retnlb	4.94687	0.000969948	6.53486	0.000557558		Retnlb	3.61037	2.56e-06	3.63445	3.01e-05		Retnlb	2.40206	0.000566767	2.22145	0.000160349
Rgs1	3.41658	0.00681746	1.23736	0.00423944		Rgs1	1.67437	6.57e-05	2.08633	3.02e-05		Rgs1	3.15466	0.00218534	2.24167	0.00785129
Rgs16	3.29029	0.00305672	3.50763	0.00141617		Rgs16	1.24691	0.00054906	1.25648	0.00100741		Rgs16	2.95923	0.000136822	2.88297	0.000183232
Rsad2	7.12779	0.00120356	5.58651	0.000415495		Rsad2	4.79787	1.83e-07	3.17359	2.79e-05		Rsad2	4.14692	0.00169796	3.58394	0.00283319
Rtp4	3.28704	0.000721825	2.87985	0.000431593		Rtp4	2.37237	1.15e-06	2.32349	2.42e-05		Rtp4	2.14983	0.00107554	2.22787	0.00011726
Saa1	6.5917	0.000584199	5.69286	0.000186667		Saa1	5.48962	5.01e-06	5.37633	5.42e-05		Saa1	7.88301	1.58e-05	5.87836	0.000108884
Saa3	8.06621	0.000754666	7.44046	0.000395216		Saa3	5.88921	3.23e-06	5.35688	3.78e-06		Saa3	9.05961	8.15e-05	7.43285	0.000282722
Scgb1c1	-2.41628	0.0270197	-3.36285	0.000205355		Scgb1c1	-1.73332	0.000158822	-2.01444	3.01e-05		Scgb1c1	-1.74089	0.00548874	-2.48248	0.000123061
Sct	4.45245	0.00113924	2.43378	0.00319867		Sct	3.31238	4.61e-06	2.60985	2.34e-05		Sct	4.04799	0.00065807	4.00561	0.00186951
Sectm1a	5.97735	0.000942294	5.16249	0.000391594		Sectm1a	3.04486	3.23e-06	3.23781	8.12e-06		Sectm1a	3.41428	0.000398044	3.0248	0.000281175
Sectm1b	3.187	0.00149544	2.32267	0.000658376		Sectm1b	2.53408	6.49e-06	2.47438	4.66e-05		Sectm1b	2.35381	0.000437622	2.04743	0.000122936
Serpina3n	4.49897	0.000815526	5.36914	0.000489725		Serpina3n	1.63424	4.2e-05	1.61696	0.0013451		Serpina3n	3.35057	0.000258232	2.6659	0.000333671
Siglec1	3.60329	0.00167876	2.62136	0.00204214		Siglec1	2.41824	4.03e-06	2.77156	3.53e-05		Siglec1	2.74381	0.000181749	2.62994	0.000367475
Slc15a3	2.44302	0.00620267	2.9132	0.00027743		Slc15a3	1.11371	0.000411014	1.06203	0.000758944		Slc15a3	2.34451	0.000214675	2.32159	0.000245858
Slc26a4	2.77606	0.0198184	2.60413	0.00602474		Slc26a4	2.20058	0.000122905	2.16693	4.92e-05		Slc26a4	1.49985	0.00367062	2.70424	0.000814405
Slc28a2	3.00783	0.00817695	3.6356	0.000431593		Slc28a2	1.04742	9.68e-05	1.32105	0.000164181		Slc28a2	1.97028	0.00782013	1.46768	0.00257383
Slc2a6	1.9448	0.00757838	2.20347	0.000560926		Slc2a6	1.1336	0.0008931	1.32412	0.000332674		Slc2a6	1.66724	0.00135715	1.44104	0.00301845
Slfn1	3.39792	0.00346425	4.67715	0.000342134		Slfn1	1.81045	2.69e-05	1.81	8.59e-05		Slfn1	3.34648	0.000229537	3.18547	0.000240636
Slfn10-ps	3.28131	0.00176715	3.41859	0.00029494		Slfn10-ps	2.28084	4.27e-06	2.11158	7.65e-05		Slfn10-ps	3.5187	4.74e-05	3.54527	0.00011726
Slfn2	2.80918	0.00241942	3.16453	0.00031188		Slfn2	1.52349	4.23e-05	1.92434	5.25e-05		Slfn2	2.67026	7.93e-05	2.16976	0.000345554
Slfn3	4.43422	0.0015706	4.11604	0.00054056		Slfn3	2.13925	0.000197294	1.37141	0.00137704		Slfn3	5.20546	2.91e-05	4.83028	0.000107223
Slfn4	6.4074	0.00093131	6.66836	0.000397303		Slfn4	4.05004	1.55e-06	2.59996	3.15e-05		Slfn4	6.12583	4.74e-05	5.68097	0.000148816
Slfn8	3.36919	0.00134525	3.44443	0.00027743		Slfn8	1.35018	4.79e-05	1.14528	0.00076544		Slfn8	2.81536	0.00220522	3.1404	0.000183232
Socs1	2.48375	0.00429785	3.12606	0.00253533		Socs1	2.29067	7.28e-06	2.64005	1.62e-05		Socs1	2.5234	0.000234659	2.40112	0.000702386
Socs3	2.01045	0.00306428	1.67757	0.00909284		Socs3	1.48685	3.4e-05	1.60205	0.000291956		Socs3	1.72442	0.00124793	1.29639	0.00141851
Sp100	2.16638	0.00286037	1.37968	0.00107394		Sp100	1.14472	4.95e-05	1.06941	0.000435285		Sp100	1.45662	0.000816255	1.33306	0.000546024
Spats2l	1.92431	0.00471265	1.09121	0.00105707		Spats2l	1.92937	1.6e-05	1.76874	0.000202908		Spats2l	1.26177	0.00507366	1.4308	0.000260079
Stat1	2.13289	0.00097491	2.10674	0.00413227		Stat1	1.32486	2.81e-05	1.63148	8.18e-05		Stat1	1.72965	0.00131579	1.85371	0.00057712
Stat2	2.6487	0.000968807	2.38624	0.000737865		Stat2	2.11587	3.45e-06	2.26595	3.15e-05		Stat2	2.60247	0.000198237	2.30245	0.000189846
Steap4	1.37045	0.00263511	1.47264	0.00608187		Steap4	1.25623	8.67e-05	1.26833	0.00156228		Steap4	1.90999	0.0019699	2.00117	0.000289636
Syt12	3.01171	0.000475376	2.47819	0.000934012		Syt12	1.04593	0.000325157	1.41035	0.000591555		Syt12	2.20065	0.000198237	2.45497	0.000285301
Tap1	2.92515	0.00213834	3.42319	0.000916208		Tap1	1.54583	9.07e-05	2.2033	4.73e-05		Tap1	2.14263	0.00260068	2.69075	0.000189846
Tap2	1.55184	0.00278371	1.30623	0.0205929		Tap2	1.01669	0.000256715	1.75867	0.0021059		Tap2	1.54262	0.00245451	1.36181	0.00201766
Tcirg1	1.27317	0.00628138	1.19686	0.00680641		Tcirg1	1.08075	0.000270539	1.17337	0.000373764		Tcirg1	1.5861	0.00300697	1.56022	0.000424373
Tcstv3	3.29952	0.00426072	2.96976	0.00215168		Tcstv3	1.95508	1.25e-05	2.38031	9.98e-05		Tcstv3	3.44509	6.72e-05	3.20837	0.000387263
Tgfbi	2.31222	0.00326675	3.00462	0.000342134		Tgfbi	1.00696	0.000270539	1.71944	6.31e-05		Tgfbi	2.56107	6.89e-05	2.48641	0.000100202
Timp1	5.77726	0.00093131	5.84976	0.000431593		Timp1	3.86588	3.26e-06	2.78196	1.93e-05		Timp1	6.19062	1e-05	5.16061	0.000100202
Tmem106a	2.18787	0.00528566	2.29535	0.000673069		Tmem106a	1.02571	6.76e-05	1.17658	0.000537486		Tmem106a	2.2021	0.000219887	2.08424	0.00016916
Tmem173	1.28019	0.00444146	2.05666	0.000557558		Tmem173	1.10217	9.39e-05	1.50093	0.000180266		Tmem173	1.74909	0.000861956	1.84785	0.000134311
Tnfaip6	2.78146	0.00167876	3.32731	0.000486804		Tnfaip6	1.59467	4.56e-05	1.02363	0.00391165		Tnfaip6	2.4307	0.00103372	1.64904	0.00512538
Tnip3	2.29421	0.00232389	2.13902	0.000365769		Tnip3	1.02192	0.000276873	1.16501	0.00285647		Tnip3	1.74186	0.00264528	1.56901	0.000733068
Tor3a	3.32572	0.00126617	2.58173	0.000557558		Tor3a	1.89604	4.96e-06	1.72701	5.87e-05		Tor3a	1.74147	0.000367828	1.75357	0.000257852
Tpx2	1.52165	0.0109519	2.8641	0.00158664		Tpx2	1.51306	8.32e-06	2.12573	4.19e-05		Tpx2	1.69226	0.00284173	2.68766	0.000100202
Trafd1	1.78695	0.00373319	1.47466	0.00310478		Trafd1	1.30096	0.000229561	1.41318	0.000241506		Trafd1	1.9751	0.000319272	1.90929	0.000399084
Trex1	3.26669	0.00127974	2.85142	0.000205355		Trex1	1.85685	0.000178772	1.8308	0.000189726		Trex1	2.49731	0.000492866	2.58677	0.000314147
Trim30a	3.38556	0.000981912	2.74162	0.000633579		Trim30a	2.07597	2.56e-06	2.01993	8.03e-05		Trim30a	2.63851	0.00112161	2.82533	0.000180207
Trim30d	3.61091	0.00134525	3.17165	0.000551442		Trim30d	2.08843	4.27e-06	3.91384	8.87e-06		Trim30d	2.79443	0.00101836	2.8339	0.000197254
Uba7	1.60658	0.00233506	1.06475	0.013048		Uba7	1.1936	0.000101078	1.30524	0.000621608		Uba7	1.36772	0.000804254	1.09833	0.000956321
Ubd	5.71924	0.00410748	6.20956	0.00572533		Ubd	2.12916	1.92e-05	3.3469	2.45e-05		Ubd	6.45358	2.2e-05	5.94849	0.000260079
Uhrf1	1.87756	0.00400907	2.78879	0.000560926		Uhrf1	1.61819	3.1e-05	2.33311	6.32e-05		Uhrf1	1.96693	0.00467359	2.78437	0.000100202
Uox	-2.16501	0.00432203	-2.66922	0.0156916		Uox	-3.85954	5.28e-06	-1.09604	0.00119183		Uox	-1.35513	0.00474644	-1.46854	0.00304837
Usp18	5.10412	0.000584199	3.57445	0.00029494		Usp18	3.26056	3.57e-07	3.23747	1.25e-05		Usp18	3.49641	4.55e-05	3.41475	0.000100202
Xaf1	3.59959	0.000682628	2.71639	0.000260221		Xaf1	2.33457	1.38e-06	2.32772	2.6e-05		Xaf1	3.04803	8.19e-05	2.98607	0.000107466
Xcl1	2.77651	0.00644871	2.25148	0.030283		Xcl1	1.41044	0.000276934	1.77643	5.42e-05		Xcl1	3.19035	0.00171344	3.21262	0.00116296
Zbp1	5.69737	0.000721825	5.70193	0.00015565		Zbp1	4.06835	2.65e-06	4.54741	8.98e-06		Zbp1	5.0107	3.2e-05	4.79087	0.000123061
Znfx1	2.2747	0.000969948	1.54604	0.00258253		Znfx1	1.45184	0.00014961	1.42206	0.000336332		Znfx1	1.69092	0.00192142	1.7333	0.000412395
