# Supplementary material for: The Identification Distinct Antiviral Factors Regulated Influenza Pandemic H1N1 Infection
Source: Int J Microbiol. 2024 Jan 9;2024:6631882. doi: 10.1155/2024/6631882 (PMC10791480; doi:10.1155/2024/6631882)
Supplement: Supplementary Materials — Supplementary data1: the DEG in A/California/04/2009 H1N1 infection. Supplementary data2: the DEG in two different strains of H1N1pdm09 (A/Jena/5258/09 and A/California/7/2009). Supplementary data3: the overlapped DEGs in all analysed datasets infected with H1N1pdm09 strains at 3dpi and 5dpi. Supplementary data4: H1N1pdm1918-induced DEGs. Supplementary data5: the DEGs induced by nH1N1pdm. [file 6631882.f1.zip › Supplementary data 2.xlsx]

## Sheet: A_Jena_5258_09
3days				5days
ID	logFC	adj.P.Val		ID	logFC	adj.P.Val
Saa3	7.09227	4.40589e-16		Timp1	4.36333	1.65824e-10
Irf7	4.87148	1.08807e-13		Saa3	6.36849	3.77344e-10
Lcn2	4.09966	2.04338e-12		Cxcl9	4.96799	5.14231e-10
G1p2	4.31999	4.12088e-12		Cxcl10	5.29093	5.14231e-10
Apod	4.3003	4.12088e-12		Oas1g	3.47166	5.95913e-10
Ch25h	3.9322	4.12088e-12		Ifit3	3.42271	6.31071e-10
Usp18	3.34873	4.12088e-12		Irf7	4.38975	1.01707e-09
Ccl7	5.18648	4.26979e-12		Igtp	3.78927	1.42384e-09
Timp1	4.88548	5.20316e-12		Gbp1	3.15289	1.42384e-09
Ccl2	3.15941	8.89426e-12		Tgtp	2.54851	1.42384e-09
Ifit3	3.47066	8.89426e-12		Serpina3n	3.73786	1.42384e-09
Serpina3n	4.10331	8.89426e-12		Prkr	2.16005	1.67641e-09
Oasl1	3.69635	1.54639e-11		Ch25h	3.87929	1.76292e-09
Ccl12	4.02429	1.76752e-11		Aox3	-2.70181	2.51994e-09
Fcgr2b	2.41239	1.80951e-11		Ccl12	4.24121	2.51994e-09
Oasl2	2.68233	2.56937e-11		Pdcd1lg1	3.30728	2.83475e-09
Oas1g	3.4271	2.56937e-11		Oasl1	3.38771	2.83475e-09
Apobec1	2.62992	3.82234e-11		Ccr5	3.18113	3.0477e-09
Mx2	2.96963	5.00606e-11		G1p2	4.21308	3.77303e-09
Ccl4	4.29409	5.00606e-11		Serpina3h	3.48697	3.77303e-09
Lgals3bp	2.82996	7.57048e-11		Oasl2	2.68404	3.77303e-09
Ms4a6d	3.67613	9.2093e-11		Areg	2.6012	3.79994e-09
Ifi202b	3.63865	9.2093e-11		Gbp2	2.91939	3.79994e-09
2310061N23Rik	2.92407	1.1539e-10		AI451557	2.42746	3.79994e-09
Ccl9	2.23682	2.04664e-10		BC049975	3.33939	4.52262e-09
Il6	3.4389	2.04664e-10		Mx2	2.69694	5.04731e-09
D11Lgp2e	2.33351	2.09134e-10		Ccl7	4.92006	5.98924e-09
H2-Bf	3.06538	2.47729e-10		Apobec1	2.1504	6.24738e-09
Cxcl10	4.13601	3.23049e-10		C1qb	2.17695	6.47134e-09
2510004L01Rik	4.01731	3.36246e-10		Gbp4	2.94287	8.57286e-09
Hc	-1.99068	3.36246e-10		Ctps	1.86772	1.0728e-08
Tlr13	2.17663	3.6353e-10		Ltbp4	-1.75888	1.0728e-08
C1qb	1.82818	3.6353e-10		2310061N23Rik	2.87891	1.09288e-08
Serpina3h	2.8224	3.98547e-10		D11Lgp2e	2.37429	1.1637e-08
Cxcl1	4.20885	4.4831e-10		Parp14	2.37089	1.20226e-08
Slfn1	2.36293	4.4831e-10		Fcrl3	3.48411	1.34463e-08
Bst2	2.42779	5.23746e-10		Usp18	3.32727	1.47852e-08
Car13	2.17931	7.0688e-10		Tap1	2.29915	1.52336e-08
Gbp4	2.4102	7.60011e-10		Aif1	2.23091	1.78393e-08
Plac8	2.69284	8.57321e-10		Lgals1	1.74531	1.79414e-08
H2-T17	1.83756	9.52879e-10		Oas2	2.63596	1.85544e-08
Ctps	1.7715	1.24989e-09		Indo	4.32079	1.93515e-08
Trex1	2.02325	1.24989e-09		Lcn2	3.19872	1.99911e-08
Tyki	2.21841	1.38249e-09		Tnfaip2	1.65724	2.04962e-08
Cyp7b1	2.5789	1.46691e-09		Mlkl	2.49295	2.05288e-08
Lilrb4	2.05573	1.74084e-09		AI481100	2.88917	2.18465e-08
Egr2	2.19399	1.90714e-09		Socs3	2.51482	2.55665e-08
D14Ertd668e	2.89088	1.90714e-09		4933430F08Rik	2.84134	2.55665e-08
Sema7a	1.78544	1.95129e-09		Fcgr2b	2.5931	2.82159e-08
Oas2	2.69269	2.07813e-09		Dmn	-2.33736	2.98402e-08
Ccl3	1.81284	2.31297e-09		Gstm1	-1.71398	4.56601e-08
Ccr5	2.6994	2.33495e-09		2310016F22Rik	1.79401	4.70105e-08
Rtp4	1.53524	2.46168e-09		Slfn1	2.56308	4.70105e-08
Tnfrsf12a	2.08855	3.20759e-09		Psmb10	1.64472	4.70245e-08
Clecsf8	1.66108	3.25557e-09		Fen1	1.34772	4.70245e-08
Socs3	2.37305	3.27422e-09		Zbp1	2.33909	4.92032e-08
BC049354	1.91866	3.40368e-09		A430056A10Rik	2.61082	5.72066e-08
Ms4a7	3.09656	3.45781e-09		Fmo1	-1.40535	5.72066e-08
Ifit2	2.40718	3.45781e-09		Hist1h2ao	2.40163	5.75754e-08
Ccrn4l	1.57212	3.82736e-09		5330417C22Rik	-1.73385	5.75754e-08
A430056A10Rik	2.86542	4.31058e-09		2700055K07Rik	-1.80704	5.81647e-08
Mt1	2.17301	4.31058e-09		Ccl4	4.214	5.81647e-08
Fcgr1	2.55962	4.36867e-09		Hist1h2af	2.46121	6.53378e-08
Sn	2.40743	4.4821e-09		2510004L01Rik	4.17534	6.58467e-08
Junb	1.89309	4.7301e-09		D14Ertd668e	2.81952	6.80968e-08
Areg	2.79961	4.9593e-09		Gvin1	2.14732	7.35731e-08
1200009O22Rik	-1.7976	4.9593e-09		Cxcl1	3.15616	7.47794e-08
H2-K1	1.67079	6.1104e-09		Mcm10	1.70447	8.37301e-08
Lgmn	1.57413	6.2285e-09		Ms4a6d	3.22391	8.37301e-08
Il1b	2.223	6.35873e-09		Hoxb5	-1.52063	8.83718e-08
2310016F22Rik	1.83335	6.57015e-09		2310057H16Rik	1.41461	8.83718e-08
Il1r2	2.18207	6.57015e-09		Pon1	-2.9458	9.58516e-08
Ppa1	1.51761	6.72882e-09		Ednrb	-1.39129	1.05686e-07
2810022L02Rik	1.39586	7.7779e-09		Cat	-1.39361	1.05751e-07
Cxcl13	3.61383	1.03005e-08		Car13	1.98021	1.10394e-07
Atf3	1.84238	1.03005e-08		Camk2n1	-1.35693	1.10394e-07
LOC435565	1.86875	1.22469e-08		Lgals3bp	2.33461	1.10394e-07
Fcrl3	2.72443	1.22469e-08		Slc15a3	1.56913	1.13068e-07
Isgf3g	1.55516	1.22469e-08		Atp6v1c2	-1.31279	1.15796e-07
Mglap	1.40835	1.22469e-08		Stat2	1.73271	1.20257e-07
Ifih1	1.66503	1.27735e-08		Gbp5	3.26543	1.23585e-07
1500012F01Rik	1.21955	1.40523e-08		Uhrf1	2.40141	1.23585e-07
Prkr	1.58957	1.40523e-08		Aldh3a1	-2.09987	1.34085e-07
Mt2	1.87825	1.45024e-08		Tnfrsf12a	1.80616	1.35908e-07
Mamdc2	-1.44665	1.65355e-08		Lgi3	-1.64489	1.52389e-07
Tgfbi	2.11483	1.69357e-08		Hist1h2an	2.36212	1.58396e-07
2310057H16Rik	1.46736	1.69563e-08		LOC435565	2.95173	1.62671e-07
Gch1	1.47713	1.69563e-08		Fmo3	-2.93655	1.6605e-07
Igtp	2.45066	1.73789e-08		Sn	1.88473	1.72102e-07
Plekha4	1.66814	1.78863e-08		Daxx	1.91954	1.72102e-07
Adar	1.49742	1.8164e-08		Vav1	1.55432	1.72102e-07
Ms4a6c	1.81264	1.99295e-08		Sema7a	1.60555	1.72102e-07
Rnf144	-1.12357	2.20151e-08		Ncf4	1.72827	1.73931e-07
Agtrl1	-1.81193	2.30943e-08		Emilin2	1.51927	1.74608e-07
Phf11	3.14605	2.36486e-08		Ogfr	1.41057	1.88517e-07
H28	2.45785	2.48168e-08		Gpt1	-1.11737	1.9057e-07
Cat	-1.34882	2.48598e-08		Mglap	1.56052	1.9057e-07
Selp	2.26851	2.55005e-08		Spp1	1.83271	1.94824e-07
Cxcl16	1.48944	2.75409e-08		Tor3a	1.67709	1.94824e-07
C1qg	1.66496	2.84913e-08		P2ry6	1.50423	1.98662e-07
Pltp	-1.14738	2.93146e-08		Hap1	1.32211	2.0009e-07
Rrbp1	1.38563	3.30991e-08		Cyp4b1	-1.43081	2.11879e-07
Map3k8	1.17216	3.31261e-08		D17H6S56E-5	1.98166	2.11879e-07
H2-T23	1.85375	3.41477e-08		Cyp7b1	2.06156	2.22836e-07
Zc3hdc1	1.54668	3.43868e-08		Tpx2	1.5301	2.26943e-07
Clec4a3	1.97531	3.64411e-08		Cd14	1.73852	2.26943e-07
Mmp15	-1.23813	3.64411e-08		Cdca3	1.35422	2.29584e-07
Cdh16	-1.62872	3.64411e-08		Pla1a	1.5296	2.29584e-07
Slc7a5	1.50679	3.64411e-08		Rgs16	1.1693	2.36135e-07
Rad52b	-1.10536	3.70427e-08		Nnmt	1.60317	2.36135e-07
Gig1	-1.13107	3.70427e-08		H2-T17	1.70186	2.53965e-07
Grb7	-1.30044	3.75212e-08		Ccl9	1.76891	2.53965e-07
Edg2	1.26872	3.75212e-08		Tlr13	1.75705	2.53965e-07
Samsn1	1.4337	3.84762e-08		A630077B13Rik	3.23666	2.53965e-07
Fcgr3	1.26276	4.17889e-08		C1qg	1.81392	2.53965e-07
B230104P22Rik	-1.2979	4.24949e-08		Cldn10	-1.42267	2.53965e-07
Tnfaip3	1.53656	4.24949e-08		Sfrp1	1.67242	2.53965e-07
Tor3a	1.69165	4.2511e-08		Rgs1	2.11277	2.78566e-07
Mmp3	1.96948	4.2511e-08		Tgm2	1.35736	2.78566e-07
Plscr4	-1.2519	4.35908e-08		Ly86	1.81275	2.79772e-07
Zc3h12a	1.17978	4.4125e-08		Egr2	1.4566	2.85478e-07
Zbp1	1.92062	4.74397e-08		Bex2	-1.94174	2.90075e-07
Pla1a	2.09727	4.85224e-08		Serpina3g	3.22011	3.0884e-07
Mx1	1.55436	4.86965e-08		Il1rn	2.00817	3.27798e-07
Dmn	-1.48678	5.3752e-08		Fcgr1	2.19629	3.35028e-07
Cmtm8	-1.13338	5.47671e-08		Phf11	3.1412	3.35028e-07
9130020G10Rik	-1.26987	5.50177e-08		Ifi47	2.57297	3.38283e-07
Scgb3a1	-3.50354	5.51058e-08		Lgmn	1.50945	3.38765e-07
Cd14	1.66276	5.88227e-08		Apod	2.15179	3.45924e-07
Nrn1	-1.51359	6.38952e-08		Trafd1	1.77421	3.51888e-07
Parp14	1.52531	6.38952e-08		Tyki	2.30316	3.54328e-07
Tnc	1.39929	7.22026e-08		Il6	2.60825	3.54328e-07
Bhlhb2	1.16724	7.42456e-08		Mmp13	1.79432	3.54328e-07
Ptpn8	1.56657	8.1992e-08		Bst2	2.22263	3.54328e-07
Tap1	1.56929	8.80775e-08		Tap2	1.75547	3.54328e-07
D17H6S56E-5	1.36519	8.91073e-08		Glipr2	1.14931	3.54328e-07
Cyp4f18	1.52648	8.91073e-08		Efnb2	-1.18287	3.54328e-07
Emilin2	1.37571	9.04815e-08		Stat1	2.29747	3.54328e-07
Enc1	1.056	9.27076e-08		Uck2	1.06598	3.54328e-07
5330417C22Rik	-1.70269	9.4184e-08		Agtrl1	-1.57183	3.83287e-07
Lgals1	1.28033	9.48494e-08		H2-Q7	1.73443	3.89536e-07
Hmga1	1.03708	9.5795e-08		Top2a	1.74414	3.89536e-07
C1qa	1.05908	9.76635e-08		Acas2l	-1.35354	3.94571e-07
Aldh3a1	-1.94393	9.76829e-08		Slamf9	1.67438	4.13592e-07
Sla	1.32999	1.00922e-07		Irx5	-1.05868	4.34396e-07
AI481100	1.83747	1.03028e-07		Ccl2	2.61916	4.36179e-07
Dpp4	-1.01809	1.03052e-07		Trex1	1.93477	4.36374e-07
Cp	1.39393	1.0419e-07		Cxcl16	1.28916	4.58292e-07
Il1rn	1.91101	1.07307e-07		Mcm6	1.37004	4.58292e-07
Igsf4a	-1.02088	1.10723e-07		2900041A09Rik	-1.45094	4.58292e-07
Dtr	1.4542	1.10723e-07		Ms4a7	2.79889	4.58292e-07
Daxx	1.62782	1.12218e-07		Cdh16	-1.37868	4.90785e-07
C4b	1.7104	1.12218e-07		Birc5	1.76577	4.91869e-07
Gbp5	2.40032	1.29173e-07		Nrn1	-1.52929	4.931e-07
Cldn10	-1.7045	1.30381e-07		Gbp6	2.38915	4.931e-07
BC006779	1.20125	1.30381e-07		Ubd	2.18106	5.0689e-07
Gfpt2	1.2897	1.30861e-07		Plscr4	-1.18191	5.07535e-07
Trafd1	1.29388	1.33452e-07		C2ta	1.53419	5.07535e-07
Lgals9	1.7072	1.34541e-07		Hc	-1.31854	5.07535e-07
Aif1	1.98644	1.34541e-07		Osm	1.4833	5.07535e-07
Lrat	-1.23208	1.34541e-07		Pml	1.43255	5.07535e-07
Ogfr	1.17672	1.34565e-07		Gm1012	1.12167	5.21853e-07
Cdkn1a	1.94792	1.35642e-07		Adar	1.36926	5.25936e-07
Stat1	1.61482	1.39348e-07		Igfbp3	-1.35039	5.33858e-07
AA175286	1.17668	1.51295e-07		Il1r2	1.46615	5.33858e-07
Ifitm2	1.30717	1.51295e-07		Ppp1r9a	-1.17607	5.38207e-07
Ncf4	1.59489	1.59122e-07		Tnc	1.9594	5.67435e-07
Prkcz	-1.18815	1.61332e-07		Pfc	1.59821	5.89133e-07
Hmox1	1.20339	1.62841e-07		Irf1	1.30933	6.32273e-07
Myd88	1.04211	1.64752e-07		C1qa	1.05899	6.61896e-07
Mlkl	1.88312	1.65462e-07		Ube1l	1.39455	6.61896e-07
Ptx3	1.26813	1.7654e-07		Ris2	1.34187	6.76158e-07
1810046I24Rik	1.05207	1.7654e-07		Axud1	1.8819	7.17962e-07
H2-M3	1.0735	1.80483e-07		Smpdl3b	1.15017	7.22103e-07
C2	1.84723	1.80789e-07		Mcm5	1.7994	7.22518e-07
Isg20	1.53175	1.80789e-07		Igfbp6	-1.90968	7.566e-07
Slc15a3	1.46856	1.80789e-07		Hk2	1.60144	7.61715e-07
3222401M22Rik	-1.12872	1.80789e-07		Dusp2	1.29355	8.41036e-07
Igfbp3	-1.19864	1.83827e-07		Thbs1	1.23922	8.41036e-07
MGC6357	1.10661	1.841e-07		Trim21	1.23401	8.59933e-07
Gstt3	-1.13012	1.90085e-07		Gch1	1.50352	9.28773e-07
Thbs3	-1.03883	1.90085e-07		Bid	1.13454	9.90538e-07
Tuba6	1.15992	1.90223e-07		Cdc2a	1.67311	1.01823e-06
Lst1	1.55835	1.91867e-07		Mt1	1.99045	1.03103e-06
Tlr7	1.32297	2.0755e-07		Ifi202b	3.5144	1.06627e-06
Ly6e	1.66661	2.10952e-07		Ccl11	1.53384	1.13492e-06
Aox3	-2.39508	2.10952e-07		Nrap	1.34064	1.13879e-06
P2ry6	1.27181	2.10952e-07		Xdh	1.52852	1.13879e-06
Axud1	1.93641	2.13205e-07		Gig1	-1.04879	1.13879e-06
Nfil3	1.1571	2.19214e-07		Hist2h2ac	1.44858	1.16311e-06
Hey1	-1.265	2.22009e-07		Cyp2f2	-2.19275	1.16311e-06
Sod2	1.02597	2.25084e-07		Psmb8	1.31255	1.17151e-06
Gbp2	1.72725	2.25084e-07		Tnfsf13b	1.07622	1.17151e-06
Stat2	1.60518	2.25084e-07		Hey1	-1.60345	1.17151e-06
Ms4a8a	1.19823	2.2807e-07		Rnf144	-1.33001	1.17151e-06
Adamts4	2.33473	2.2807e-07		Rtp4	1.49934	1.18729e-06
Sap30	1.11052	2.32063e-07		Hbb-b2	-2.90288	1.2075e-06
Arg2	1.32585	2.32138e-07		Ddx58	1.48798	1.2075e-06
C1qtnf2	-1.02893	2.43533e-07		Zc3hdc1	1.73833	1.21854e-06
Fkbp5	1.99273	2.43533e-07		Lphn3	-1.18646	1.22492e-06
Scgb3a2	-3.7217	2.49354e-07		Hist1h2ak	2.34058	1.23511e-06
H2-gs17	1.45867	2.81325e-07		Hmox1	1.14317	1.25098e-06
C3	1.24326	2.83601e-07		Iyd	-1.14349	1.25429e-06
Gadd45g	1.2537	2.83849e-07		Wars	1.69069	1.25793e-06
Ddx58	1.35093	2.88494e-07		Bmp6	-1.34062	1.29202e-06
Aytl2	-1.25758	3.0014e-07		Mad2l1	1.2027	1.29705e-06
Ifitm6	1.6652	3.07627e-07		LOC380683	-1.10551	1.30296e-06
LOC547343	1.45256	3.12103e-07		Cd86	1.5184	1.30296e-06
BC094916	1.56576	3.14808e-07		Abca8a	-1.14685	1.34346e-06
H2-Q7	1.84838	3.15082e-07		Prss22	1.31743	1.34346e-06
Igfbp2	-1.06949	3.15156e-07		Samsn1	1.50882	1.35296e-06
Pira4	1.09433	3.15156e-07		Hist1h2ah	2.36428	1.455e-06
Lox	1.2509	3.25394e-07		Cbr2	-1.5235	1.4571e-06
Trf	-1.05932	3.28434e-07		EG433016	1.44119	1.49517e-06
Bcl3	1.13172	3.37964e-07		Adamts4	1.65493	1.51777e-06
Glt25d2	-1.01838	3.51209e-07		2610208M17Rik	1.20166	1.55845e-06
Lgi2	1.11106	3.5824e-07		Myd88	1.47993	1.62876e-06
Vav1	1.28971	3.59014e-07		Slc7a5	1.83674	1.64414e-06
0610005K03Rik	-2.60007	3.59014e-07		Rad52b	-1.13544	1.66995e-06
Mme	-1.04973	3.59014e-07		Ccl8	2.92799	1.68337e-06
Tap2	1.24333	3.61017e-07		0610009F02Rik	1.05159	1.68337e-06
2310007A19Rik	-1.32418	3.62592e-07		Grn	1.11667	1.71057e-06
Gp49a	1.50875	3.75869e-07		EG634650	2.84311	1.71057e-06
Acas2l	-1.4812	3.85594e-07		Kcnab2	1.14627	1.71057e-06
EG433016	2.28819	3.88457e-07		Gprasp1	-1.11314	1.71057e-06
Dfy	1.21997	4.19845e-07		1200013B22Rik	1.38355	1.75806e-06
Efna1	-1.04412	4.23095e-07		Gpr114	1.78702	1.79598e-06
Pla2g7	1.63934	4.26695e-07		AA175286	1.2038	1.79598e-06
Gpc3	-1.2062	4.4222e-07		Cdkn1a	1.64136	1.87231e-06
Gstm1	-1.45059	4.4222e-07		Bnip3l	-1.09885	1.88932e-06
Gprasp1	-1.10224	4.54646e-07		Ppa1	1.74343	1.90496e-06
H2-Q5	1.51306	4.68546e-07		H2-Bf	2.48285	1.93394e-06
Prps2	-1.02479	4.68546e-07		Plekha4	1.14892	1.93394e-06
LOC432555	1.38359	4.78945e-07		MGC29978	-1.65666	1.93394e-06
Ltbp4	-1.63516	4.91532e-07		Lst1	1.26827	1.93394e-06
2900041A09Rik	-1.14145	5.03426e-07		Selenbp1	-1.05645	1.93394e-06
Emb	-1.14383	5.05498e-07		P2ry14	1.11453	1.95678e-06
Sgpp2	-1.20765	5.087e-07		Slamf8	1.77797	2.02029e-06
6330415F13Rik	-1.21492	5.087e-07		AI132321	1.01058	2.05775e-06
Tlr2	1.15242	5.087e-07		Tnxb	-1.04799	2.05775e-06
Ephx1	-1.39538	5.36942e-07		Wbscr5	1.22678	2.07594e-06
A430084P05Rik	1.15372	5.36942e-07		LOC626578	2.56294	2.07594e-06
Egr1	2.23867	5.36942e-07		BC049354	1.51609	2.08214e-06
Wfdc1	-1.43272	5.4405e-07		2210023G05Rik	-1.28764	2.11624e-06
Es22	-1.05867	5.73283e-07		Gpnmb	1.23463	2.40601e-06
Gpnmb	1.23709	6.11476e-07		Clspn	1.22876	2.40601e-06
Klra17	1.18868	6.185e-07		Kif23	1.34018	2.40601e-06
Fgl2	1.08531	6.20939e-07		Hist1h2ad	2.15389	2.41825e-06
BC022145	1.0551	6.43754e-07		Slc2a6	1.67057	2.45865e-06
Scube2	-1.36348	6.47186e-07		Ifi35	1.06895	2.4927e-06
Ifi47	1.63296	6.67239e-07		Slc16a6	1.3289	2.49386e-06
BC038479	-1.1459	6.69647e-07		Rrbp1	1.01234	2.51402e-06
Igf2bp2	1.07835	6.72924e-07		Sh2d2a	1.64496	2.52775e-06
4930422J18Rik	1.16658	6.90597e-07		EG241041	-1.07331	2.5651e-06
Tgm2	1.12441	6.98352e-07		Nt5c3	1.32195	2.5651e-06
H2-Q8	1.42984	7.015e-07		Ifitm1	1.18827	2.58538e-06
Ly6c	1.14559	7.06546e-07		Dtr	1.56243	2.60589e-06
Brp17	-1.16463	7.45832e-07		2010012F05Rik	1.29732	2.60589e-06
Bex2	-1.65123	7.51189e-07		BC026645	-1.03733	2.60589e-06
Angptl4	2.27799	7.64505e-07		H2-gs17	1.02194	2.67421e-06
Has1	1.22767	7.6914e-07		Fgf1	-1.35941	2.87384e-06
Plunc	-3.49771	7.6914e-07		Emb	-1.0129	2.91192e-06
BC049975	1.9524	7.95641e-07		Irx3	-1.32371	2.98148e-06
Pml	1.2111	8.03509e-07		Cenpa	1.09283	2.98148e-06
Ednrb	-1.1132	8.04599e-07		Sec14l3	-1.79896	2.98148e-06
Cyp1b1	1.76618	8.50707e-07		Alas2	-3.09188	3.0157e-06
Thbs1	1.10143	8.73917e-07		Ccnb1	1.45023	3.13504e-06
A630077B13Rik	2.07017	9.01593e-07		Tyms	1.28822	3.1568e-06
Nfkbiz	1.3388	9.0694e-07		Mapt	-1.09526	3.1568e-06
Lgi3	-1.40401	9.29069e-07		Ephx1	-1.33686	3.25149e-06
Sec14l3	-1.43344	9.60376e-07		1200008O12Rik	1.56218	3.27228e-06
Gabrp	-1.719	9.78429e-07		Kif2c	1.09098	3.40193e-06
Ppp1r14c	-1.16289	9.86315e-07		Stfa3	1.81099	3.43548e-06
Ly86	1.42884	1.00173e-06		Chia	-1.34156	3.45109e-06
Lcp2	1.27602	1.05082e-06		3222401M22Rik	-1.09927	3.50045e-06
Rgs1	2.09607	1.05082e-06		Gadd45g	1.20879	3.50564e-06
Cxcl2	1.73434	1.05836e-06		Psat1	1.42329	3.52485e-06
2310046K10Rik	1.50523	1.06271e-06		Mt2	1.40317	3.54575e-06
Slc16a6	1.22105	1.06271e-06		Trf	-1.04671	3.62178e-06
Soat2	1.02053	1.0644e-06		Hmgcs2	-1.95239	3.78812e-06
Ms4a6b	1.49467	1.0703e-06		Dscr1	1.12195	3.79564e-06
Ifnb1	1.98924	1.0703e-06		Ear10	-1.46071	3.9599e-06
Inhba	1.13215	1.11165e-06		BC006779	1.00895	4.14823e-06
EG630499	1.41477	1.12896e-06		Prkcz	-1.24432	4.21533e-06
1200013B22Rik	1.12816	1.17742e-06		Pla2g1b	-1.10236	4.23296e-06
Wif1	-1.13586	1.25689e-06		Cbx7	-1.1441	4.28823e-06
Samhd1	1.08084	1.25689e-06		Aard	-1.00297	4.29601e-06
D9Ertd280e	-1.19497	1.30197e-06		Scgb3a2	-2.87693	4.32266e-06
9130019I15Rik	1.11986	1.30197e-06		Zfp36	1.29011	4.35244e-06
Ifi35	1.22132	1.33271e-06		Igf1	1.62212	4.55801e-06
Hap1	1.02502	1.34781e-06		Rad54l	1.02327	4.65719e-06
Gbp1	1.75062	1.44201e-06		H2-K1	1.16086	4.69241e-06
Ccl5	1.34703	1.46953e-06		2310046K10Rik	1.56459	4.74178e-06
Nfkbia	1.00689	1.51497e-06		H28	2.489	4.74178e-06
Pcolce2	-1.41889	1.54742e-06		1110012J17Rik	-1.03297	4.74178e-06
Tgtp	1.31571	1.57294e-06		Gabrp	-1.29063	4.80432e-06
Fmo3	-2.54607	1.57403e-06		D4Bwg0951e	-1.10073	4.80813e-06
Psmb8	1.09959	1.61012e-06		Slc26a4	2.16714	4.94539e-06
LOC100034251	1.39336	1.65292e-06		Lpxn	1.38068	4.99823e-06
Grn	1.13996	1.66128e-06		6330415F13Rik	-1.13701	5.21353e-06
Zfp36	1.49496	1.71364e-06		Rnase4	-1.0057	5.28546e-06
LOC56628	1.40852	1.75805e-06		Spag5	1.65689	5.30923e-06
Tcirg1	1.05482	1.78076e-06		Sh3bp2	1.15453	5.58817e-06
Pira3	1.27539	1.79975e-06		C4b	1.5285	5.78301e-06
Evi2a	1.53233	1.81551e-06		Inmt	-1.10642	5.78301e-06
Gvin1	1.49428	1.82566e-06		Adcy9	-1.033	5.86602e-06
Cxcl9	2.79778	1.83672e-06		Esm1	-2.27264	5.86602e-06
Hk2	1.12574	1.87232e-06		Fbxw17	1.14509	5.90936e-06
B230114J08Rik	-1.12119	1.87542e-06		4930422J18Rik	1.47085	5.90936e-06
Map3k6	1.34831	1.88236e-06		Plvap	-1.10368	5.94985e-06
LOC626578	1.41106	1.89386e-06		Meis1	-1.07242	5.94985e-06
Vpreb3	-1.16637	1.92383e-06		2810022L02Rik	1.3585	6.10152e-06
Ifi203	1.53014	1.95444e-06		H2-T23	1.40924	6.45928e-06
Tyrobp	1.03453	1.98057e-06		Dscr6	-1.19578	6.62878e-06
Lpxn	1.41951	2.00478e-06		Gatm	1.35188	6.70225e-06
Diras2	-1.01002	2.00563e-06		Rrm2	1.0182	6.84324e-06
D530004J12Rik	-1.14294	2.04605e-06		Cpd	-1.19062	7.03355e-06
Tmem49	1.04513	2.07993e-06		Nfil3	1.34275	7.21399e-06
Sirpb1	1.19406	2.12725e-06		A430084P05Rik	1.34696	7.28176e-06
Atp6v1c2	-1.04268	2.21434e-06		Lilrb4	2.18601	7.28176e-06
Nnmt	1.48232	2.22727e-06		Pld1	1.05097	7.28176e-06
Scd1	-1.48748	2.23093e-06		Ifng	1.60031	7.35261e-06
Inhbb	1.1865	2.23436e-06		Bcl3	1.42577	7.54096e-06
AI132321	1.21395	2.24352e-06		Tapbpl	1.18436	7.60792e-06
Casp4	1.57125	2.29667e-06		D19Ertd678e	1.07855	7.60792e-06
Nt5c3	1.04868	2.51652e-06		Ifit2	2.50702	7.82076e-06
Mlp	1.12707	2.56285e-06		MGC6357	1.10997	7.91579e-06
2700055K07Rik	-1.78375	2.61001e-06		Xcl1	1.00117	7.91628e-06
Ccl8	1.99158	2.61553e-06		AA467197	2.15852	7.93256e-06
Slpi	1.05916	2.63985e-06		Csprs	1.14363	7.98595e-06
Bcl2a1c	1.05626	2.78563e-06		Akap14	-1.13113	7.99404e-06
2210023G05Rik	-1.17692	2.79282e-06		Sftpb	-1.54249	8.32412e-06
Alox5ap	1.10954	2.80021e-06		Lox	1.21817	8.68307e-06
Orm1	1.61928	2.82568e-06		Pbk	1.96043	9.13523e-06
Dncl2b	-1.96348	2.84359e-06		Smad6	-1.6599	9.84251e-06
D930038M13Rik	-1.00896	2.8524e-06		Mmp14	1.18438	9.92696e-06
Psat1	1.12166	2.8524e-06		Stk6	1.27884	1.00244e-05
Kcnk2	-1.29581	2.88801e-06		Sirpb1	1.1379	1.00279e-05
Uhrf1	1.45342	3.03866e-06		Prickle1	-1.16973	1.04222e-05
BC004853	-1.01124	3.17447e-06		Plac8	2.44765	1.04963e-05
Edg7	-1.00003	3.29435e-06		2300003P22Rik	1.01049	1.11741e-05
Pdcd1lg1	1.75657	3.44674e-06		Acbd4	-1.00147	1.11894e-05
Pbef1	1.03875	3.55693e-06		6330505N24Rik	-1.3799	1.15048e-05
Krt1-23	-1.03286	3.62097e-06		Pnp	1.2027	1.19485e-05
Elf5	-1.0013	3.67617e-06		Upp1	1.06582	1.21931e-05
Tmprss2	-1.24055	3.67617e-06		BC013712	1.1496	1.2298e-05
Dcxr	-1.33167	3.69854e-06		Ccl3	1.58302	1.2542e-05
Daf1	-1.03092	3.7244e-06		Clu	1.02829	1.2542e-05
Trim30	1.26934	4.11556e-06		1200009O22Rik	-1.28555	1.25799e-05
AA467197	1.58279	4.46552e-06		EG630499	1.17549	1.27267e-05
Amica1	1.11214	4.48426e-06		Foxp1	-1.03001	1.29755e-05
Gatm	1.0283	4.53361e-06		Plk1	2.11583	1.35824e-05
Bmp6	-1.14177	4.583e-06		B230104P22Rik	-1.0481	1.36261e-05
6330505N24Rik	-1.47289	4.69004e-06		Chst3	-1.0755	1.36828e-05
Tmem46	-1.1611	4.70198e-06		Trim30	1.45695	1.42449e-05
Cd68	1.02064	4.70409e-06		Cxcl13	2.95685	1.43452e-05
Cd177	1.2125	4.80043e-06		Noxo1	1.08617	1.43452e-05
Fos	2.05213	5.42725e-06		Lgals9	1.10608	1.44064e-05
Plek	1.0781	5.82514e-06		1300018L09Rik	-1.02173	1.50626e-05
Ube1l	1.10204	5.87242e-06		Irf5	1.14913	1.58825e-05
LOC380683	-1.32815	6.10018e-06		Pcolce2	-1.52522	1.63178e-05
Osm	1.49697	6.22255e-06		Arhgef15	-1.05245	1.6684e-05
Tlr1	1.08763	6.22705e-06		Hist1h2ag	1.90534	1.70883e-05
Gpr65	1.59125	6.43237e-06		Rabac1	-1.06771	1.78683e-05
Prss22	1.3437	6.75096e-06		Lrat	-1.21274	1.78683e-05
S100a8	1.87479	6.90369e-06		Oas3	1.06204	1.78823e-05
Dixdc1	-1.15887	6.93904e-06		Kif22	1.94954	1.79023e-05
1110049B09Rik	-1.71554	7.09417e-06		Efna1	-1.20179	1.8149e-05
Plekhb1	-1.21551	7.13614e-06		Kcnk2	-1.23012	1.8149e-05
Gjb6	-1.052	7.17229e-06		9130019I15Rik	1.37166	1.81492e-05
LOC209387	1.09535	7.50107e-06		H2-M3	1.219	1.83664e-05
Dp1l1	-1.54386	7.61291e-06		LOC100034251	1.40433	1.84119e-05
Iyd	-1.07369	7.84105e-06		D9Ertd280e	-1.01077	1.8564e-05
Ttc29	-1.25432	8.14736e-06		Clecsf12	1.02651	1.86149e-05
S100a9	1.73725	8.15124e-06		Pcyt1a	-1.12766	1.91911e-05
Per2	1.23086	8.18301e-06		2610041P08Rik	1.02366	1.97327e-05
Klk6	1.95815	8.47563e-06		Wif1	-1.13943	2.00116e-05
Klhl6	1.00697	8.50512e-06		Hbb-b1	-2.81431	2.00116e-05
Cxcl5	2.15094	9.25858e-06		Brp17	-1.00675	2.00539e-05
Foxa1	-1.05864	9.65783e-06		Fkbp5	1.7826	2.02547e-05
Nrarp	-1.03282	9.91531e-06		Ptpn8	1.22609	2.02547e-05
D0H4S114	-1.34374	1.00887e-05		Orm1	1.02754	2.06341e-05
6330406I15Rik	1.07424	1.04494e-05		Gtse1	1.54465	2.07357e-05
Adm	1.20967	1.0811e-05		Il10ra	1.15638	2.09602e-05
AI451557	1.37644	1.0811e-05		Spc25	1.08252	2.13568e-05
Lrpb7	-1.28955	1.12257e-05		D530004J12Rik	-1.06101	2.1442e-05
Plk3	1.01284	1.12284e-05		Plekhb1	-1.17639	2.16455e-05
Irf5	1.15482	1.1279e-05		E130016E03Rik	1.20304	2.18177e-05
Havcr2	1.0527	1.20937e-05		Cd97	-1.24209	2.1995e-05
Pon1	-2.5413	1.2167e-05		Anln	1.63157	2.21338e-05
Slfn2	1.12848	1.28075e-05		Gp49a	1.62831	2.21338e-05
Csf3r	1.43294	1.31989e-05		Tyms-ps	1.23844	2.21338e-05
Sh3bp2	1.07147	1.33755e-05		Snx10	1.43887	2.21338e-05
Oas3	1.07259	1.3891e-05		Edg7	-1.01712	2.23576e-05
Xdh	1.21167	1.43679e-05		C2	1.3787	2.24297e-05
Stfa3	1.88608	1.44521e-05		Kif15	1.06677	2.24713e-05
Cyp2f2	-2.63683	1.47147e-05		Lrrn3	-1.14862	2.25273e-05
Ank3	-1.06475	1.47739e-05		Scgb3a1	-3.38352	2.31799e-05
Gbp6	1.11497	1.50426e-05		LOC209387	1.13994	2.32214e-05
Hmgcs2	-1.38837	1.51497e-05		Tk1	1.31684	2.32214e-05
Il8rb	1.53072	1.52015e-05		Krt1-18	1.02702	2.37614e-05
Slamf9	1.47612	1.56302e-05		Ly6e	1.32887	2.39439e-05
EG634650	1.62567	1.58975e-05		9130020G10Rik	-1.15824	2.45367e-05
Esm1	-1.5526	1.59831e-05		Cpxm1	1.48451	2.48717e-05
Pdk4	1.76507	1.60935e-05		Evi2a	1.40567	2.49357e-05
Emr1	1.30916	1.61515e-05		Cdc20	1.93773	2.53638e-05
1190002H23Rik	1.10416	1.69603e-05		Mlp	1.20067	2.54956e-05
Fyb	1.18448	1.7081e-05		Ctsh	1.04818	2.55787e-05
Gm1574	-1.00416	1.71167e-05		Gsta3	-1.4782	2.68039e-05
Cyp2a5	-1.94713	1.7545e-05		Dbf4	1.05008	2.68788e-05
Slc2a6	1.23932	1.77628e-05		Cyp2a5	-2.1295	2.68788e-05
Mdh1b	-1.13516	1.96839e-05		Lcp2	1.26706	2.68876e-05
Fgf1	-1.07847	1.97147e-05		Chodl	1.83649	2.77182e-05
1700001C02Rik	-1.18416	2.01386e-05		Tnfaip3	1.40387	2.79406e-05
Mrgpra2	1.10211	2.17696e-05		Prc1	2.38178	2.9357e-05
Gpr114	1.37099	2.24747e-05		Sox18	-1.59376	2.96942e-05
Gpr171	1.2569	2.24912e-05		Socs1	1.06939	3.0481e-05
Psmb9	1.02657	2.30817e-05		Tgfbi	1.83416	3.0481e-05
Scel	-1.22976	2.89004e-05		Hist2h2ab	1.42354	3.11951e-05
Cyp2s1	-1.09787	3.37176e-05		Bmp3	-1.01776	3.11951e-05
4933430F08Rik	1.04785	3.89576e-05		Krt1-23	-1.0117	3.17872e-05
Spag6	-1.31894	3.89576e-05		Psmb1	1.12853	3.27142e-05
Aqp4	-1.07958	3.9716e-05		Hoxa5	-1.03891	3.32827e-05
Klk5	1.04988	4.15342e-05		Il4i1	1.44796	3.33761e-05
Tsga2	-1.32908	4.29233e-05		Ppp1r14c	-1.46511	3.37933e-05
Cbr2	-1.7435	5.05265e-05		Enc1	1.05228	3.54591e-05
Stfa2	1.33166	5.09764e-05		Cdca2	1.36286	3.59908e-05
Igfbp6	-1.10157	5.21826e-05		Ccrn4l	1.40171	3.88863e-05
Klk1b27	1.07313	5.36976e-05		Ctsk	1.03239	3.95486e-05
Igf1	1.00541	5.38378e-05		Casp1	1.38792	3.96517e-05
Sox18	-1.03449	5.39984e-05		Psmb9	1.4963	3.98691e-05
1110017D15Rik	-1.46764	5.43952e-05		Amica1	1.07928	4.1771e-05
Indo	1.8332	5.79992e-05		LOC225594	1.77372	4.20325e-05
Sftpb	-1.10759	6.00361e-05		Nkg7	1.444	4.21332e-05
4930449E07Rik	-1.33225	6.13309e-05		Mmp15	-1.12033	4.47669e-05
Ppp1r3c	-1.06126	6.17131e-05		Col5a1	1.09348	4.64505e-05
Mycbpap	-1.11011	7.61056e-05		Dp1l1	-1.1956	4.73197e-05
2010001J22Rik	-1.13756	7.61056e-05		Tlr7	1.05459	4.88668e-05
2300003P22Rik	1.1335	7.65035e-05		Tuba6	1.17099	4.88668e-05
Akap14	-1.21423	8.42949e-05		Mx1	1.56418	5.14406e-05
Slc26a4	1.30221	9.03162e-05		Ear12	-1.30677	5.14599e-05
Stmn2	-1.02414	9.64749e-05		2022-03-01	1.0467	5.67343e-05
Cyr61	1.0597	9.80425e-05		1110017D15Rik	-1.08717	5.81108e-05
Chia	-1.39738	0.000112959		Syne1	-1.13458	5.83027e-05
4933434I06Rik	-1.06998	0.00011709		Gpr65	1.53446	5.9742e-05
2310006J04Rik	1.01764	0.000134026		Zfhx1b	-1.0568	6.09855e-05
Ankrd1	1.51085	0.00013892		Gm1574	-1.08938	6.22113e-05
MGC29978	-1.06415	0.000161988		6030411F23Rik	1.0161	6.23524e-05
Clic6	-1.27235	0.000176263		BC026370	-1.05346	6.39151e-05
Nme5	-1.0662	0.000223091		1110049B09Rik	-1.26322	6.50252e-05
Serpina3g	1.60812	0.000264607		Mmp12	1.46122	6.72789e-05
Gja4	-1.08878	0.000285605		Rbm3	1.22822	6.94317e-05
Chad	-1.76336	0.000325152		Casp4	1.67373	6.9761e-05
Cyp4a12	-1.04749	0.000368433		Snca	-1.94471	7.0407e-05
Stfa1	1.06233	0.000447846		Igf2bp2	1.00758	7.13841e-05
Lrg1	1.07764	0.000475327		Csf2rb2	1.18056	7.165e-05
Kcnrg	-1.00402	0.000481098		Dixdc1	-1.13965	7.31712e-05
A430083B19Rik	-1.06069	0.000556837		Mcm2	1.16542	7.34751e-05
Per1	1.11149	0.000617147		Cd177	1.22635	7.34751e-05
Npr3	-1.22792	0.000660008		Fcgr3	1.4779	7.44333e-05
Myl3	-1.17735	0.000818455		Cyp1b1	1.64144	7.66748e-05
U46068	-1.79976	0.00105673		Tm4sf12	-1.31546	7.84286e-05
Sult1d1	-1.05897	0.00116999		2310007A19Rik	-1.09338	7.85951e-05
1810037B05Rik	-1.01678	0.00154811		Aqp4	-1.09728	7.85951e-05
Retnlg	1.21029	0.00225835		Ndc80	1.17241	7.98423e-05
Acta1	1.54234	0.00277773		Incenp	1.06825	8.06058e-05
Clps	2.4683	0.0316877		Nusap1	1.60557	8.392e-05
Pnlip	2.33613	0.0318445		Igfbp5	-1.064	8.71899e-05
Nppa	2.74979	0.0323212		Grb7	-1.127	8.86507e-05
Ela2	2.35277	0.0393582		Cd52	1.03447	9.19658e-05
Prss2	2.10205	0.043878		Cxcl5	2.42269	9.55701e-05
Ela1	1.64068	0.048192		Zxda	-1.23241	9.65513e-05
				Ptx3	1.08694	9.8754e-05
				Samhd1	1.66877	0.000100994
				Il1b	1.81302	0.000101231
				Tmem46	-1.0311	0.000103555
				Hba-a1	-2.4553	0.000106957
				Atf3	1.94275	0.000109862
				Klrk1	1.07385	0.000112975
				Fbxo30	-1.03993	0.000113236
				0610005K03Rik	-2.05415	0.000114548
				Lrpb7	-1.04439	0.000117058
				Cd3e	1.04025	0.000118348
				Rassf3	-1.28948	0.00011835
				Arg1	1.11897	0.000121899
				Pbef1	1.45719	0.000133749
				B230219D22Rik	-1.06064	0.00013771
				Myo1g	1.00773	0.000138047
				Chad	-1.57069	0.00013914
				Edn1	-1.10516	0.00013914
				Isg20	1.20436	0.00013914
				Mxi1	-1.21881	0.000142612
				Hemp1	1.07299	0.000151861
				OTTMUSG00000005737	1.00058	0.000154162
				Klk6	1.49715	0.000156431
				Pgrmc1	-1.12583	0.000156431
				Icsbp1	1.19867	0.00016041
				Aldh6a1	-1.0537	0.000161171
				Plunc	-3.19464	0.000162487
				Aldh1a1	-1.40366	0.000167155
				Ifih1	1.36092	0.000173256
				Kcnrg	-1.02138	0.000184364
				Gfod1	-1.14202	0.000188102
				Cdc6	1.0876	0.000190796
				Ifnb1	1.96314	0.000204528
				Cbr1	-1.00522	0.00020793
				Selp	1.3838	0.000228823
				Cyp4f18	1.05321	0.000240998
				Tubb5	1.10258	0.000255683
				Egr1	1.54046	0.000257008
				Clec4a3	1.3242	0.000266376
				Dcxr	-1.11356	0.000267322
				Fblim1	1.05097	0.00027113
				Cox7a1	-1.00433	0.000278595
				Pltp	-1.11272	0.000292987
				Trem2	1.00714	0.000305335
				Hs3st1	-1.06575	0.000326545
				Lmnb1	1.59191	0.000329868
				Cd69	1.42005	0.000330273
				Col1a1	1.22567	0.000332658
				LOC432555	1.44705	0.000335048
				Bcl2a1c	1.13751	0.000356799
				Ctla4	1.78221	0.000365624
				Junb	1.25871	0.000425922
				Bcl2a1d	1.01179	0.000431046
				Npr3	-1.43226	0.000434372
				Plek	1.04608	0.000434372
				Clecsf8	1.00173	0.000440469
				Tlr2	1.01505	0.000453039
				Stfa2	1.21879	0.000457371
				D730019B10Rik	1.2639	0.000466122
				6430548M08Rik	-1.10791	0.000521801
				Ogt	-1.02036	0.000526521
				Rbms3	-1.15807	0.000587833
				BC094916	1.33191	0.00060184
				Wfdc1	-1.05228	0.000603624
				Cbfa2t3h	-1.21648	0.000657386
				Slc4a1	-1.43672	0.000682554
				Ms4a6c	1.31122	0.000714773
				Gpr171	1.52525	0.000733818
				Iqgap3	1.00735	0.000877354
				Fgl2	1.56855	0.000890681
				Alcam	-1.11194	0.00102112
				Angptl4	1.50567	0.00107535
				Fos	1.22793	0.00115865
				Lrg1	1.13325	0.00117134
				Prps2	-1.06894	0.00121631
				Aytl2	-1.34012	0.00129064
				Abp1	1.09746	0.00138129
				Sla	1.11226	0.00138733
				Mamdc2	-1.18179	0.00146013
				Cyp4a12	-1.03273	0.00163785
				Capn6	1.06587	0.00183447
				2310006J04Rik	1.01237	0.00208093
				Mdk	1.05472	0.0023283
				Ifitm6	1.10329	0.00234748
				Upk3b	-1.04175	0.00264394
				Mb	-1.43602	0.0027993
				Tff2	-2.02915	0.00291719
				Emr1	1.00847	0.00294976
				Hamp	-1.36257	0.00312183
				Map1lc3b	-1.01879	0.00346926
				Myl3	-1.16679	0.00352671
				Acot1	-1.11275	0.00384558
				Eln	1.2585	0.00675699
				Ckmt1	1.03966	0.00817908
				Ms4a6b	1.08586	0.00940188
				Myl7	-1.27305	0.0112935
				Retnla	2.64473	0.0259415

## Sheet: A_California_07_2009
3days				5days
ID	logFC	adj.P.Val		ID	logFC	adj.P.Val
Apod	3.05351	4.72049e-05		Irg1	3.94517	0.000250563
Ifi204	2.26251	0.000267384		Cxcl13	3.39125	0.000287168
I830012O16Rik	2.84543	0.000424126		Saa3	5.8124	0.000434805
Gm9706	3.13106	0.000478481		Cxcl10	6.08588	0.000434805
Irf7	3.22443	0.000502151		Rsad2	4.48929	0.000482894
Ifi27l2a	2.63299	0.000573433		Cd69	2.92545	0.000482894
Ly6i	3.59205	0.000573433		Ms4a4c	3.74112	0.000482894
Cxcl10	4.19265	0.000573433		Timp1	4.22787	0.000482894
Mx1	1.81723	0.000573433		Ifi204	3.16318	0.000482894
Ifit3	2.38465	0.000701899		Ly6i	3.945	0.000482894
Dhx58	2.30652	0.000701899		Ms4a6b	2.85472	0.000557927
Usp18	2.02987	0.000793977		AA467197	3.31631	0.000594962
Ifi205	2.9717	0.00102746		Ifit2	3.11394	0.000607166
Timp1	2.3777	0.00102746		Cfb	2.85172	0.000609173
Rsad2	2.95145	0.00102746		Mx1	3.18463	0.000609173
Saa3	3.66752	0.00141828		Ccl7	3.76131	0.000609173
Slfn8	2.13135	0.00141828		I830012O16Rik	3.11741	0.0006142
Cfb	2.1589	0.00141828		Gm9706	3.62442	0.000692111
Ifit2	2.00876	0.00141828		Cxcl9	4.99213	0.000742885
Ms4a6d	2.07532	0.00164181		Ms4a6d	3.23223	0.000742885
Gm5431	2.6983	0.00164338		Ms4a4b	2.29628	0.000742885
Trim30d	1.74343	0.00164338		Ccl3	3.24152	0.000742885
Ifit1	2.72905	0.00164338		Zbp1	3.64173	0.00090823
Ccl12	2.63327	0.00164338		Ifi205	3.99296	0.00118107
Bst2	1.79915	0.0017027		Il1rn	2.32234	0.00118107
Ms4a4c	2.27371	0.00176068		Ifi27l2a	3.0059	0.00133362
Zbp1	2.86219	0.00220247		Cd177	1.90983	0.00135722
Slfn4	2.62265	0.00244489		Rgs1	2.28178	0.00135722
Ifi44	2.42374	0.00251356		Ms4a6c	2.96357	0.00146004
Oas3	1.91406	0.00251356		Irf7	3.90037	0.00146004
Ppa1	1.09027	0.00253664		Dhx58	2.81166	0.00146004
Mx2	2.20052	0.00268066		Slfn4	5.02109	0.00146004
Oasl2	2.10614	0.00308199		Msr1	2.44596	0.00146004
Apol9a	2.42703	0.00308199		Usp18	2.65884	0.00151795
Parp14	1.14856	0.00308199		Ms4a4a	2.45936	0.0015975
Phf11d	1.97376	0.00309567		Il6	3.46612	0.0016422
Fcgr1	1.83099	0.00310287		Ifit3	2.75299	0.00171275
Ddx60	2.35015	0.00310287		Serpina3f	2.27313	0.00179734
Sp100	1.09351	0.00310287		Slfn8	3.0609	0.00189476
Mitd1	1.01994	0.00310287		Trim30d	2.35488	0.00196706
Ifih1	1.03011	0.00310287		Gp2	1.68184	0.00196706
Oas1a	1.87325	0.00328137		Nt5c3	1.56818	0.00196706
Rnf213	1.46276	0.00328137		Gp49a	2.16331	0.00205741
Pyhin1	1.64255	0.00342657		Pyhin1	3.01451	0.00207589
Xaf1	1.82389	0.00365394		Fcgr1	2.98023	0.00238246
Lgals3bp	1.34273	0.00386704		Tarm1	2.06396	0.00260045
Oas1g	2.13165	0.00386704		Mx2	2.94793	0.00260045
Ddx58	1.24593	0.00392611		Plac8	2.82159	0.00260045
Trim30a	1.59049	0.00392611		Ccl2	3.42711	0.00268036
Parp9	1.27972	0.0044576		Ccl4	1.58547	0.00272419
Eif2ak2	1.27471	0.00479487		Phf11a	3.17366	0.0028475
Cd69	1.59269	0.00479487		Orm1	1.48122	0.00291992
Parp12	1.0237	0.00485974		Gm8979	1.45239	0.00291992
Epsti1	1.37165	0.00622688		Sectm1b	2.21439	0.00291992
Herc6	1.73687	0.00636857		Klrk1	1.61786	0.00315011
Oas2	2.62935	0.00636857		Ch25h	2.28846	0.00315011
Serpina9	1.03416	0.00692248		Oas1a	2.48377	0.00316464
Gm4951	2.45411	0.00745961		Ccl12	3.62574	0.00319562
Cmpk2	1.59318	0.00746582		Parp14	1.45066	0.00319562
Cxcl9	4.04358	0.00749157		Aif1	1.28457	0.00328184
Ms4a6c	1.959	0.00749157		Ifih1	1.46301	0.00329077
Ms4a6b	1.60201	0.00833889		Epsti1	2.14911	0.00349043
Gm5970	2.17752	0.00840468		Gm4951	2.56721	0.00349043
Retnla	1.93015	0.00877045		Cxcl11	2.47447	0.00360547
Stat2	1.37772	0.00910233		BC094916	2.15011	0.00360547
Ifi203	1.11996	0.0100101		Parp9	1.6039	0.00360547
Phf11a	2.28918	0.0101546		Trim30a	2.13351	0.00367901
Gbp3	2.19777	0.0111602		Ifit1	3.20885	0.00367901
BC023105	3.11968	0.0125615		Slfn10-ps	2.22661	0.00367901
AI607873	1.59811	0.0125615		Il1b	2.16404	0.00367901
Dtx3l	1.03683	0.0125615		Lilrb4	1.62254	0.00367901
Rtp4	2.02673	0.0125615		Gbp5	2.41643	0.00375551
Plac8	1.85746	0.0125615		Ly86	1.54516	0.00375551
Stat1	1.73591	0.0128034		Gm5970	2.30446	0.00395963
LOC102639543	1.48966	0.0130168		Cd274	1.91147	0.00466245
Slfn9	1.42155	0.0132137		Ddx60	2.88967	0.00477071
Slfn1	1.69407	0.0133131		Gm12250	2.82705	0.00478899
Irf9	1.00607	0.0133815		Herc6	2.26373	0.00478899
H2-T24	1.20298	0.0137261		Klra3	1.49259	0.00478899
Ccl7	1.9407	0.0137261		Cd86	1.59206	0.00484283
Irgm1	1.86256	0.0144594		AI607873	2.63495	0.00484749
Samd9l	1.0753	0.0155236		LOC102639543	2.68312	0.00484749
Sectm1b	1.35595	0.0179995		Apod	3.11349	0.00485548
Ube2l6	1.31639	0.0180533		Rnf213	1.75027	0.00514979
Cyp2a22	-1.0173	0.0212149		Muc5ac	2.32518	0.00537907
Vcan	1.30845	0.0223623		Tnf	1.80217	0.00550907
Il18bp	1.15169	0.0260547		Eif2ak2	1.57133	0.00565904
Cxcl13	1.90206	0.0261228		Mitd1	1.2299	0.00569763
Iigp1	2.16556	0.0267378		Oas3	3.06326	0.00582924
Oasl1	1.77428	0.026756		Slfn2	1.58581	0.00582924
Agr2	2.00431	0.0286194		Gm1966	1.22209	0.00582924
Mlkl	1.28543	0.0289852		Gm4070	1.44893	0.0060356
Tgtp2	1.85793	0.0346195		AW112010	1.52006	0.0060356
AW112010	1.51623	0.0346195		Ctss	1.15737	0.00617889
Ccl2	1.25383	0.035113		Dmbt1	1.309	0.00617889
Ccl8	2.05169	0.0366034		Tnip3	1.62769	0.00637996
Casp1	1.1289	0.0366034		Slc26a4	1.42911	0.00637996
Ch25h	1.23647	0.0366034		Oas1g	2.79585	0.00639595
Ifitm6	1.06056	0.0406727		Phf11d	2.25114	0.0064503
Psmb8	1.08907	0.0432941		Themis	1.14114	0.00651234
Lypd8	1.42609	0.0479374		Gm6377	1.7525	0.00651234
Gm12185	1.92372	0.0482182		Gm5431	2.89297	0.00671114
Slfn10-ps	1.32832	0.0483184		Pnp2	1.16363	0.00679855
H2-T22	1.16368	0.0484316		Irgm1	2.31457	0.00679855
				Cmpk2	2.26787	0.00679855
				Il18bp	1.62176	0.00679855
				Nmi	1.20148	0.00679855
				Cd53	1.11924	0.00679855
				Dck	1.35011	0.00679855
				Ddx58	1.56926	0.00679855
				Stat2	1.8221	0.00679855
				Gm12185	1.77025	0.00679855
				Ifi44	2.57257	0.00679855
				Bst2	1.91341	0.00679855
				Fam26f	1.70499	0.00679855
				Areg	1.2243	0.00688328
				Gzmb	2.90925	0.00721538
				Casp4	1.66204	0.00736604
				Oas2	3.05892	0.00750961
				Slamf8	1.87049	0.00764544
				Gpr65	2.05498	0.00782334
				Oasl2	2.33962	0.00782561
				Gm8995	1.73987	0.00839981
				Vcan	2.15295	0.00839981
				Mlkl	1.89504	0.00842115
				Ccl11	1.31106	0.00872113
				Ccr2	1.2905	0.00896652
				Ube2l6	1.4168	0.00922172
				Ifi47	1.82998	0.00978628
				Sirpb1a	1.07041	0.00978628
				Ppa1	1.23882	0.00978628
				Helz2	1.28569	0.0098975
				Ms4a14	1.84677	0.00996691
				Oasl1	3.12397	0.0100385
				Slfn9	2.3433	0.0100777
				A530064D06Rik	2.39346	0.0100904
				Dtx3l	1.37943	0.0101378
				Gbp3	2.29108	0.0102806
				H2-T22	1.49073	0.010585
				Tgfbi	1.49653	0.010823
				Wfdc17	1.6667	0.010823
				Slfn1	3.01154	0.010823
				Nfkbie	1.09093	0.010823
				Klrd1	1.38582	0.010823
				A530032D15Rik	1.61091	0.010823
				Ifi203	1.55184	0.010823
				Gm4841	1.15464	0.010823
				C130026I21Rik	1.23486	0.0109065
				Agr2	2.40133	0.010919
				Rgs16	1.6188	0.010919
				Tap1	1.6544	0.011143
				H2-K1	1.25397	0.011143
				Cxcl5	2.57169	0.0111989
				Scimp	2.15242	0.0111989
				Ptprc	1.09596	0.0111989
				Trafd1	1.17474	0.0111989
				Ccr5	2.10125	0.0116733
				Xcl1	2.41219	0.0117259
				Iigp1	2.24689	0.0119975
				Sp100	1.2391	0.0123579
				Tgtp2	1.99095	0.0123579
				Retnla	2.14659	0.0123579
				Clec4e	2.16763	0.0124582
				Trim21	1.10171	0.0124582
				Gm4759	1.37691	0.0125907
				Gatm	1.50293	0.0126981
				Stat1	1.88808	0.0127295
				D17H6S56E-5	1.41394	0.0127295
				Fgl2	1.41091	0.0127295
				Gm7609	1.20218	0.0127428
				Socs3	1.21969	0.0127428
				Apol9a	2.62463	0.0131159
				Igtp	1.96006	0.0132493
				Nampt	1.16822	0.0133827
				Car13	1.61492	0.0133896
				Xaf1	1.95472	0.0135011
				Fam46a	1.10328	0.0135011
				Sp140	1.14306	0.0137988
				Adar	1.14276	0.0137988
				Tnfrsf1b	1.0612	0.0137988
				Daxx	1.38092	0.0137988
				Csf2rb2	1.11277	0.0140017
				Clec5a	1.46964	0.0141415
				Trim30b	1.50924	0.0141415
				Il18rap	1.23615	0.0141536
				Setdb2	1.18811	0.0141536
				Cxcl3	1.18535	0.0141927
				Cxcl2	1.94764	0.0141927
				Tnfrsf9	1.19664	0.0141927
				Pstpip1	1.05295	0.0143376
				Lgals3bp	1.67313	0.0144366
				Ccl5	1.92648	0.0144366
				2010002M12Rik	1.31205	0.0147586
				Isg20	1.0706	0.0154089
				Samd9l	1.38359	0.0159389
				Ifi35	1.13729	0.0159389
				Ccl8	1.7299	0.0168119
				C920025E04Rik	1.2445	0.0168119
				Inhba	1.07942	0.0168984
				Cd7	1.40607	0.0175957
				5430427O19Rik	1.20727	0.0178934
				Tnc	1.79265	0.0180114
				Parp12	1.27704	0.0180583
				LOC546061	1.00399	0.0184172
				Psmb8	1.38428	0.0184172
				Gbp2	1.90658	0.0184172
				Gpr84	1.22516	0.0186113
				Gpr141	1.7723	0.0186668
				BC023105	3.07505	0.0190382
				H2-Q4	1.28531	0.0193967
				Runx3	1.23916	0.0204304
				Sell	1.212	0.0209697
				Slfn5	1.14576	0.0209978
				Mthfd2	1.83224	0.0209978
				Irf5	1.05939	0.0211117
				Ms4a7	1.97111	0.0218537
				C3ar1	2.25855	0.0218537
				Atf3	2.07239	0.0220446
				Pnp	1.43006	0.0225284
				Hpse	1.19522	0.0225284
				Vav1	1.18706	0.0225284
				Orm2	1.05116	0.0231338
				Ogfr	1.07955	0.0238717
				Milr1	1.33777	0.0243191
				H2-Q5	1.29146	0.0246951
				Muc5b	1.11842	0.0248167
				Znfx1	1.16827	0.0251966
				Themis2	1.25693	0.025369
				Casp1	1.26937	0.0254013
				Nkg7	1.81575	0.025529
				Fcgr2b	1.07115	0.0262977
				F3	1.09546	0.0263486
				Rtp4	2.1889	0.0263486
				Ptafr	1.75075	0.0266568
				Pnpt1	1.02996	0.0266743
				Cd72	2.84697	0.0299802
				Clec7a	1.14542	0.0303201
				Tnfaip3	1.01405	0.0309267
				Gbp8	1.19134	0.0312635
				Sp110	1.36204	0.0315449
				Gch1	1.49901	0.0315449
				Ubd	1.01804	0.0315449
				Clec12a	1.06381	0.0317455
				Il2ra	1.56949	0.0324283
				9930111J21Rik1	1.05406	0.0324283
				Rnf19b	1.01879	0.0328833
				Oas1b	1.77533	0.0337721
				Tlr9	2.16269	0.0339012
				Klra8	1.56247	0.0339563
				H2-Q8	1.58202	0.0340464
				Gbp11	1.74466	0.0346538
				Mxd1	1.03559	0.0369605
				Hmgcs2	-1.11942	0.0372188
				9930111J21Rik2	1.06175	0.0373749
				Cd52	1.23419	0.0379763
				Hells	1.09272	0.0379763
				Serpina3n	1.26659	0.0380271
				Gbp7	1.29383	0.0380271
				Tmem173	1.21217	0.0380271
				Sectm1a	1.35375	0.0380271
				Siglec1	1.41043	0.0380775
				Clec4a1	1.56026	0.0386753
				Pydc4	2.59428	0.0393921
				Ifitm6	1.38738	0.0402942
				Gimap3	1.06026	0.0405127
				Il10ra	1.57366	0.040578
				Dnase1l3	1.09627	0.0415739
				Phf11c	2.28299	0.0415739
				Mt2	1.90986	0.0425508
				Ccdc67	1.15662	0.0432917
				Gpr171	1.48317	0.0437525
				Plau	1.17031	0.0445491
				Slamf7	1.8854	0.0452766
				Cd3g	1.25519	0.0452766
				Gzma	1.86284	0.0452766
				Ido1	1.58032	0.0452766
				C1qc	1.32095	0.0467915
				Gm10212	1.83892	0.0480839
				Irf9	1.072	0.048677
				Gbp10	1.97788	0.048677
				Ly9	1.39642	0.048677
				Osm	1.45164	0.0495816
				Lrrc25	1.05498	0.0496685

## Sheet: DEG_otherH1N1pdm09
ID	3dpi					ID	5dpi
	A_Jena_5258_09		A_California_07_2009				A_Jena_5258_09		A_California_07_2009
	logFC	adj.P.Val	logFC	adj.P.Val			logFC	adj.P.Val	logFC	adj.P.Val
Apod	4.3003	4.12088e-12	3.05351	4.72049e-05		AA467197	2.15852	7.93256e-06	3.31631	0.000594962
Bst2	2.42779	5.23746e-10	1.79915	0.0017027		Adar	1.36926	5.25936e-07	1.14276	0.0137988
Ccl12	4.02429	1.76752e-11	2.63327	0.00164338		Aif1	2.23091	1.78393e-08	1.28457	0.00328184
Ccl2	3.15941	8.89426e-12	1.25383	0.035113		Apod	2.15179	3.45924e-07	3.11349	0.00485548
Ccl7	5.18648	4.26979e-12	1.9407	0.0137261		Areg	2.6012	3.79994e-09	1.2243	0.00688328
Ccl8	1.99158	2.61553e-06	2.05169	0.0366034		Atf3	1.94275	0.000109862	2.07239	0.0220446
Ch25h	3.9322	4.12088e-12	1.23647	0.0366034		BC094916	1.33191	0.00060184	2.15011	0.00360547
Cxcl10	4.13601	3.23049e-10	4.19265	0.000573433		Bst2	2.22263	3.54328e-07	1.91341	0.00679855
Cxcl13	3.61383	1.03005e-08	1.90206	0.0261228		Car13	1.98021	1.10394e-07	1.61492	0.0133896
Cxcl9	2.79778	1.83672e-06	4.04358	0.00749157		Casp1	1.38792	3.96517e-05	1.26937	0.0254013
Ddx58	1.35093	2.88494e-07	1.24593	0.00392611		Casp4	1.67373	6.9761e-05	1.66204	0.00736604
Fcgr1	2.55962	4.36867e-09	1.83099	0.00310287		Ccl11	1.53384	1.13492e-06	1.31106	0.00872113
Ifi203	1.53014	1.95444e-06	1.11996	0.0100101		Ccl12	4.24121	2.51994e-09	3.62574	0.00319562
Ifih1	1.66503	1.27735e-08	1.03011	0.00310287		Ccl2	2.61916	4.36179e-07	3.42711	0.00268036
Ifit2	2.40718	3.45781e-09	2.00876	0.00141828		Ccl3	1.58302	1.2542e-05	3.24152	0.000742885
Ifit3	3.47066	8.89426e-12	2.38465	0.000701899		Ccl4	4.214	5.81647e-08	1.58547	0.00272419
Ifitm6	1.6652	3.07627e-07	1.06056	0.0406727		Ccl7	4.92006	5.98924e-09	3.76131	0.000609173
Irf7	4.87148	1.08807e-13	3.22443	0.000502151		Ccl8	2.92799	1.68337e-06	1.7299	0.0168119
Lgals3bp	2.82996	7.57048e-11	1.34273	0.00386704		Ccr5	3.18113	3.0477e-09	2.10125	0.0116733
Mlkl	1.88312	1.65462e-07	1.28543	0.0289852		Cd177	1.22635	7.34751e-05	1.90983	0.00135722
Ms4a6b	1.49467	1.0703e-06	1.60201	0.00833889		Cd52	1.03447	9.19658e-05	1.23419	0.0379763
Ms4a6c	1.81264	1.99295e-08	1.959	0.00749157		Cd69	1.42005	0.000330273	2.92545	0.000482894
Ms4a6d	3.67613	9.2093e-11	2.07532	0.00164181		Cd86	1.5184	1.30296e-06	1.59206	0.00484283
Mx1	1.55436	4.86965e-08	1.81723	0.000573433		Ch25h	3.87929	1.76292e-09	2.28846	0.00315011
Mx2	2.96963	5.00606e-11	2.20052	0.00268066		Csf2rb2	1.18056	7.165e-05	1.11277	0.0140017
Oas1g	3.4271	2.56937e-11	2.13165	0.00386704		Cxcl10	5.29093	5.14231e-10	6.08588	0.000434805
Oas2	2.69269	2.07813e-09	2.62935	0.00636857		Cxcl13	2.95685	1.43452e-05	3.39125	0.000287168
Oas3	1.07259	1.3891e-05	1.91406	0.00251356		Cxcl5	2.42269	9.55701e-05	2.57169	0.0111989
Oasl1	3.69635	1.54639e-11	1.77428	0.026756		Cxcl9	4.96799	5.14231e-10	4.99213	0.000742885
Oasl2	2.68233	2.56937e-11	2.10614	0.00308199		D17H6S56E-5	1.98166	2.11879e-07	1.41394	0.0127295
Parp14	1.52531	6.38952e-08	1.14856	0.00308199		Daxx	1.91954	1.72102e-07	1.38092	0.0137988
Plac8	2.69284	8.57321e-10	1.85746	0.0125615		Ddx58	1.48798	1.2075e-06	1.56926	0.00679855
Ppa1	1.51761	6.72882e-09	1.09027	0.00253664		Fcgr1	2.19629	3.35028e-07	2.98023	0.00238246
Psmb8	1.09959	1.61012e-06	1.08907	0.0432941		Fcgr2b	2.5931	2.82159e-08	1.07115	0.0262977
Rtp4	1.53524	2.46168e-09	2.02673	0.0125615		Fgl2	1.56855	0.000890681	1.41091	0.0127295
Saa3	7.09227	4.40589e-16	3.66752	0.00141828		Gatm	1.35188	6.70225e-06	1.50293	0.0126981
Slfn1	2.36293	4.4831e-10	1.69407	0.0133131		Gbp2	2.91939	3.79994e-09	1.90658	0.0184172
Stat1	1.61482	1.39348e-07	1.73591	0.0128034		Gbp5	3.26543	1.23585e-07	2.41643	0.00375551
Stat2	1.60518	2.25084e-07	1.37772	0.00910233		Gch1	1.50352	9.28773e-07	1.49901	0.0315449
Timp1	4.88548	5.20316e-12	2.3777	0.00102746		Gp49a	1.62831	2.21338e-05	2.16331	0.00205741
Usp18	3.34873	4.12088e-12	2.02987	0.000793977		Gpr171	1.52525	0.000733818	1.48317	0.0437525
Zbp1	1.92062	4.74397e-08	2.86219	0.00220247		Gpr65	1.53446	5.9742e-05	2.05498	0.00782334
						H2-K1	1.16086	4.69241e-06	1.25397	0.011143
						Hmgcs2	-1.95239	3.78812e-06	-1.11942	0.0372188
						Ifi35	1.06895	2.4927e-06	1.13729	0.0159389
						Ifi47	2.57297	3.38283e-07	1.82998	0.00978628
						Ifih1	1.36092	0.000173256	1.46301	0.00329077
						Ifit2	2.50702	7.82076e-06	3.11394	0.000607166
						Ifit3	3.42271	6.31071e-10	2.75299	0.00171275
						Ifitm6	1.10329	0.00234748	1.38738	0.0402942
						Igtp	3.78927	1.42384e-09	1.96006	0.0132493
						Il10ra	1.15638	2.09602e-05	1.57366	0.040578
						Il1b	1.81302	0.000101231	2.16404	0.00367901
						Il1rn	2.00817	3.27798e-07	2.32234	0.00118107
						Il6	2.60825	3.54328e-07	3.46612	0.0016422
						Irf5	1.14913	1.58825e-05	1.05939	0.0211117
						Irf7	4.38975	1.01707e-09	3.90037	0.00146004
						Isg20	1.20436	0.00013914	1.0706	0.0154089
						Klrk1	1.07385	0.000112975	1.61786	0.00315011
						Lgals3bp	2.33461	1.10394e-07	1.67313	0.0144366
						Lilrb4	2.18601	7.28176e-06	1.62254	0.00367901
						Ly86	1.81275	2.79772e-07	1.54516	0.00375551
						Mlkl	2.49295	2.05288e-08	1.89504	0.00842115
						Ms4a6b	1.08586	0.00940188	2.85472	0.000557927
						Ms4a6c	1.31122	0.000714773	2.96357	0.00146004
						Ms4a6d	3.22391	8.37301e-08	3.23223	0.000742885
						Ms4a7	2.79889	4.58292e-07	1.97111	0.0218537
						Mt2	1.40317	3.54575e-06	1.90986	0.0425508
						Mx1	1.56418	5.14406e-05	3.18463	0.000609173
						Mx2	2.69694	5.04731e-09	2.94793	0.00260045
						Nkg7	1.444	4.21332e-05	1.81575	0.025529
						Nt5c3	1.32195	2.5651e-06	1.56818	0.00196706
						Oas1g	3.47166	5.95913e-10	2.79585	0.00639595
						Oas2	2.63596	1.85544e-08	3.05892	0.00750961
						Oas3	1.06204	1.78823e-05	3.06326	0.00582924
						Oasl1	3.38771	2.83475e-09	3.12397	0.0100385
						Oasl2	2.68404	3.77303e-09	2.33962	0.00782561
						Ogfr	1.41057	1.88517e-07	1.07955	0.0238717
						Orm1	1.02754	2.06341e-05	1.48122	0.00291992
						Osm	1.4833	5.07535e-07	1.45164	0.0495816
						Parp14	2.37089	1.20226e-08	1.45066	0.00319562
						Plac8	2.44765	1.04963e-05	2.82159	0.00260045
						Pnp	1.2027	1.19485e-05	1.43006	0.0225284
						Ppa1	1.74343	1.90496e-06	1.23882	0.00978628
						Psmb8	1.31255	1.17151e-06	1.38428	0.0184172
						Retnla	2.64473	0.0259415	2.14659	0.0123579
						Rgs1	2.11277	2.78566e-07	2.28178	0.00135722
						Rgs16	1.1693	2.36135e-07	1.6188	0.010919
						Rtp4	1.49934	1.18729e-06	2.1889	0.0263486
						Saa3	6.36849	3.77344e-10	5.8124	0.000434805
						Serpina3n	3.73786	1.42384e-09	1.26659	0.0380271
						Slamf8	1.77797	2.02029e-06	1.87049	0.00764544
						Slc26a4	2.16714	4.94539e-06	1.42911	0.00637996
						Slfn1	2.56308	4.70105e-08	3.01154	0.010823
						Socs3	2.51482	2.55665e-08	1.21969	0.0127428
						Stat1	2.29747	3.54328e-07	1.88808	0.0127295
						Stat2	1.73271	1.20257e-07	1.8221	0.00679855
						Tap1	2.29915	1.52336e-08	1.6544	0.011143
						Tgfbi	1.83416	3.0481e-05	1.49653	0.010823
						Timp1	4.36333	1.65824e-10	4.22787	0.000482894
						Tnc	1.9594	5.67435e-07	1.79265	0.0180114
						Tnfaip3	1.40387	2.79406e-05	1.01405	0.0309267
						Trafd1	1.77421	3.51888e-07	1.17474	0.0111989
						Trim21	1.23401	8.59933e-07	1.10171	0.0124582
						Ubd	2.18106	5.0689e-07	1.01804	0.0315449
						Usp18	3.32727	1.47852e-08	2.65884	0.00151795
						Vav1	1.55432	1.72102e-07	1.18706	0.0225284
						Xcl1	1.00117	7.91628e-06	2.41219	0.0117259
						Zbp1	2.33909	4.92032e-08	3.64173	0.00090823
