# Supplementary material for: The Identification Distinct Antiviral Factors Regulated Influenza Pandemic H1N1 Infection
Source: Int J Microbiol. 2024 Jan 9;2024:6631882. doi: 10.1155/2024/6631882 (PMC10791480; doi:10.1155/2024/6631882)
Supplement: Supplementary Materials — Supplementary data1: the DEG in A/California/04/2009 H1N1 infection. Supplementary data2: the DEG in two different strains of H1N1pdm09 (A/Jena/5258/09 and A/California/7/2009). Supplementary data3: the overlapped DEGs in all analysed datasets infected with H1N1pdm09 strains at 3dpi and 5dpi. Supplementary data4: H1N1pdm1918-induced DEGs. Supplementary data5: the DEGs induced by nH1N1pdm. [file 6631882.f1.zip › Supplementary data 3.xlsx]

## Sheet: H1N1pdm09_3dpi
Apod
Bst2
Ccl12
Ccl2
Ccl7
Ch25h
Cxcl10
Cxcl13
Cxcl9
Ddx58
Fcgr1
Ifi203
Ifih1
Ifit2
Ifit3
Ifitm6
Irf7
Lgals3bp
Mlkl
Ms4a6c
Ms4a6d
Mx1
Mx2
Oas2
Oas3
Oasl1
Oasl2
Parp14
Plac8
Ppa1
Rtp4
Saa3
Slfn1
Stat1
Stat2
Timp1
Usp18
Zbp1

## Sheet: H1N1pdm09_5dpi
Aif1
Apod
Areg
Atf3
Bst2
Car13
Casp4
Ccl11
Ccl12
Ccl2
Ccl3
Ccl4
Ccl7
Ccl8
Ccr5
Cd177
Cd86
Ch25h
Cxcl10
Cxcl13
Cxcl5
Cxcl9
Daxx
Ddx58
Fcgr1
Fcgr2b
Gatm
Gbp2
Gbp5
Gch1
Gpr171
Gpr65
Hmgcs2
Ifi35
Ifi47
Ifih1
Ifit2
Ifit3
Igtp
Il10ra
Il1rn
Il6
Irf7
Isg20
Klrk1
Lgals3bp
Lilrb4
Ly86
Mlkl
Ms4a6b
Ms4a6c
Ms4a6d
Ms4a7
Mx1
Mx2
Nt5c3
Oas2
Oas3
Oasl1
Oasl2
Ogfr
Orm1
Parp14
Plac8
Pnp
Ppa1
Psmb8
Retnla
Rgs1
Rgs16
Rtp4
Saa3
Serpina3n
Slc26a4
Slfn1
Socs3
Stat1
Stat2
Tap1
Tgfbi
Timp1
Trafd1
Ubd
Usp18
Vav1
Xcl1
Zbp1
