# Supplementary material for: The Identification Distinct Antiviral Factors Regulated Influenza Pandemic H1N1 Infection
Source: Int J Microbiol. 2024 Jan 9;2024:6631882. doi: 10.1155/2024/6631882 (PMC10791480; doi:10.1155/2024/6631882)
Supplement: Supplementary Materials — Supplementary data1: the DEG in A/California/04/2009 H1N1 infection. Supplementary data2: the DEG in two different strains of H1N1pdm09 (A/Jena/5258/09 and A/California/7/2009). Supplementary data3: the overlapped DEGs in all analysed datasets infected with H1N1pdm09 strains at 3dpi and 5dpi. Supplementary data4: H1N1pdm1918-induced DEGs. Supplementary data5: the DEGs induced by nH1N1pdm. [file 6631882.f1.zip › Supplementary data 4.xlsx]

## Sheet: GSE38112
ID	3d			ID	5d
	logFC	adj.P.Val			logFC	adj.P.Val
Dnahc17	7.13124	1.03973e-08		Dnahc17	7.01182	5.62561e-09
Cyth1	-5.68027	3.14147e-07		Cyth1	-5.86696	1.38072e-08
Ifit3	3.60829	3.63632e-07		Rtp4	2.72048	2.73118e-07
Usp18	3.41599	3.63632e-07		Irg1	7.73026	2.73118e-07
Isg15	4.52199	3.92105e-07		Lgals3bp	2.40858	2.73118e-07
Arl2bp	-2.45062	3.92105e-07		Cxcl10	7.37103	2.73118e-07
Bst2	2.60932	3.92105e-07		Isg15	4.83102	2.73118e-07
Cxcl10	6.34297	6.68832e-07		Ifit3	3.79324	2.83583e-07
Ly6f	2.84582	6.68832e-07		Arl2bp	-2.5875	3.436e-07
Lgals3bp	2.16498	6.68832e-07		Usp18	3.77566	3.98078e-07
Irg1	6.83248	6.91005e-07		Cmpk2	3.62316	4.37743e-07
Ccl7	5.04585	7.80899e-07		Bst2	2.7542	4.37743e-07
Irf7	4.55116	9.89468e-07		Timp1	3.96163	4.53127e-07
Oas1a	3.61969	9.89468e-07		I830012O16Rik	3.92939	4.53127e-07
Il18bp	2.14133	1.03373e-06		Ifit1	4.29391	4.60312e-07
Ifit1	4.13737	1.03373e-06		Ccl7	5.97461	5.05755e-07
Ch25h	3.45061	1.03373e-06		Prss22	2.6634	5.80674e-07
Btbd9	2.90315	1.16227e-06		Saa1	4.97151	5.90643e-07
Rtp4	2.50526	1.16227e-06		Irf7	5.08468	5.90643e-07
Ccl4	3.84064	1.23711e-06		Ccl12	3.87698	6.82886e-07
Zbp1	4.87263	1.32034e-06		Klhl25	-1.73801	6.82886e-07
Mx2	3.92526	1.32034e-06		Oasl1	5.0909	7.19546e-07
Mx1	4.85779	1.32351e-06		Lilra6	1.95463	7.76721e-07
Fcgr1	3.09449	1.51181e-06		Btbd9	2.83832	7.76721e-07
Oasl1	4.43127	1.56497e-06		Ccl2	5.3763	7.76721e-07
Oasl2	3.067	1.56497e-06		Fcgr1	3.84522	8.32612e-07
Klhl25	-1.55358	2.27786e-06		Sectm1a	3.72628	8.68719e-07
Sct	3.26043	2.4905e-06		Retnla	2.6928	9.42736e-07
Gbp6	2.5658	2.4905e-06		Zbp1	5.16344	9.42736e-07
Tcstv3	2.82799	2.52286e-06		Siglec1	2.64105	9.64777e-07
I830012O16Rik	3.41619	2.52286e-06		Cd177	2.11498	9.64777e-07
D14Ertd668e	2.30252	2.52286e-06		Oasl2	3.23664	9.97643e-07
H28	4.29882	2.63376e-06		Ch25h	4.54638	1.19542e-06
Irgm2	2.24114	3.37266e-06		Cxcl5	4.38746	1.26176e-06
Siglec1	2.2018	3.37266e-06		Xcl1	4.14823	1.36928e-06
Tor3a	1.94521	3.37266e-06		Saa2	4.19835	1.36928e-06
Lypd6	2.59025	3.41701e-06		Ido1	4.81707	1.38505e-06
Trim30a	2.35175	3.41701e-06		Phf11	2.91539	1.45354e-06
Igtp	2.56186	3.41701e-06		Mx2	3.96549	1.5884e-06
Xaf1	2.23386	3.41701e-06		Mx1	5.35461	1.5884e-06
Ccl2	4.17472	3.41701e-06		Trem1	2.3338	1.5884e-06
Ms4a6d	2.4338	3.63586e-06		H28	4.94823	1.5884e-06
Sectm1a	2.74669	3.65583e-06		Sct	3.57404	1.5884e-06
Trim30d	2.15274	3.65583e-06		Trim30a	2.82563	1.72196e-06
Lilra6	1.67851	3.65583e-06		Slfn9	3.70097	1.91391e-06
Dhx58	3.03669	3.99365e-06		Ccl4	4.72118	1.95113e-06
Cmpk2	3.16152	4.34557e-06		Slfn8	3.43059	1.95441e-06
Gm4955	4.52403	4.34557e-06		Saa3	5.42181	1.96728e-06
Bpifb1	-2.09545	4.34557e-06		Gbp3	2.96737	1.96728e-06
Irf9	1.53132	4.65394e-06		H2-T24	2.02737	1.96728e-06
Oas1f	3.46094	4.6609e-06		Tgfbi	1.54534	1.96728e-06
Tcstv1	2.50008	4.85382e-06		Oas1a	4.09541	2.00718e-06
Ifi27l2a	2.42387	4.92403e-06		Slfn3	3.60294	2.00718e-06
Scgb3a1	-2.33734	4.96647e-06		Ms4a6d	3.47627	2.1055e-06
Rnf213	1.7946	5.39128e-06		Ly6f	3.73893	2.12746e-06
A530032D15Rik	2.25943	5.56215e-06		Ms4a7	2.64849	2.12746e-06
Ms4a4c	2.6174	5.56215e-06		Samd9l	1.66944	2.17424e-06
C2	1.34023	5.59626e-06		Dnahc8	1.96275	2.20101e-06
Ccl12	2.95844	5.60857e-06		Il1rn	3.40724	2.39397e-06
Ido1	3.07473	5.60857e-06		Klk1	3.34452	2.39716e-06
Retnla	2.91683	5.60857e-06		Mthfd2	2.39101	2.72881e-06
Stat2	2.11044	5.95431e-06		Tor3a	2.23431	2.72881e-06
Herc6	2.20613	6.16679e-06		C1qtnf3	-1.42876	2.79351e-06
Slfn9	3.02472	6.94488e-06		Klk1b27	3.59725	2.79351e-06
Timp1	3.03386	7.61902e-06		Irgm2	2.65815	2.79351e-06
Stat1	1.81982	7.83859e-06		Gm12250	3.7673	2.81375e-06
Ifi204	2.28683	7.83859e-06		Oas1f	3.75132	2.86311e-06
Klk1b3	1.86907	7.83859e-06		Rsad2	4.90201	2.86311e-06
AI607873	3.20565	8.22445e-06		Gm4955	4.92346	2.86311e-06
Gbp3	2.66745	8.76485e-06		Ifi27l2a	2.43875	2.86311e-06
Rsad2	4.26241	8.8337e-06		Stat1	1.96688	2.86311e-06
Xcl1	2.55465	8.8337e-06		Tcstv3	3.38035	2.92963e-06
Prss22	2.43798	9.20059e-06		D14Ertd668e	2.76445	2.96405e-06
Gbp5	2.90832	9.77894e-06		Cxcl9	5.36902	2.96405e-06
Maoa	-1.16379	1.07048e-05		Gbp5	3.64412	2.96405e-06
Saa1	3.66057	1.07048e-05		Il18bp	2.87255	3.06072e-06
Ccl3	2.67388	1.07048e-05		Stat2	2.17506	3.12669e-06
Adar	1.22261	1.07048e-05		Rnf213	1.97835	3.20398e-06
Prmt8	-2.15316	1.07048e-05		Ccl3	3.67205	3.20398e-06
Phf11	2.41473	1.07048e-05		Tcstv1	2.88698	3.32678e-06
Cxcl5	3.07177	1.08442e-05		0710001D07Rik	2.13345	3.32678e-06
Neto1	2.10033	1.09088e-05		Gbp6	3.54403	3.686e-06
Slfn3	3.04296	1.09088e-05		Trim30d	2.633	3.686e-06
2310079G19Rik	1.12102	1.09088e-05		Klk1b3	2.75746	3.8055e-06
0710001D07Rik	1.86424	1.17567e-05		AI607873	3.81509	3.87163e-06
Parp14	1.50356	1.17567e-05		Adar	1.4087	4.00054e-06
Slfn10-ps	2.81352	1.26057e-05		Aspn	-1.19876	4.09161e-06
Pyhin1	2.76825	1.29248e-05		Ifit2	3.51519	4.09161e-06
Ddx58	2.21899	1.30462e-05		Lgmn	1.18573	4.17019e-06
Daxx	1.62073	1.30462e-05		Ms4a4c	3.36182	4.20052e-06
Surf4	1.14411	1.30462e-05		Il12b	3.50602	4.22368e-06
Slfn2	2.12153	1.31379e-05		Slfn10-ps	3.13019	4.22368e-06
Slfn8	2.71604	1.31379e-05		Xaf1	2.64182	4.32944e-06
Pga5	1.25215	1.31379e-05		Parp14	1.79599	4.39364e-06
Hsh2d	2.13852	1.34985e-05		Ifih1	2.08512	4.39364e-06
Pla2g2e	-2.60587	1.34985e-05		H2-K1	1.25647	4.56421e-06
Epsti1	1.93502	1.34985e-05		Oas3	4.55454	4.68234e-06
Gm14446	2.83776	1.35607e-05		Psmb10	1.1707	4.68234e-06
Lag3	1.45483	1.38394e-05		Sectm1b	2.00094	4.68865e-06
Gbp2	1.63478	1.42282e-05		Igtp	3.22267	4.99603e-06
Eif2ak2	1.87762	1.50398e-05		Ifi204	2.76874	4.99603e-06
1700010D01Rik	1.85446	1.58719e-05		Pira2	3.48029	5.14458e-06
Ifng	2.51133	1.59788e-05		Herc6	2.5591	5.16862e-06
Irgm1	2.32735	1.59788e-05		Slc29a3	1.39624	5.16862e-06
BC013712	1.53292	1.7052e-05		Dhx58	3.36186	5.23225e-06
Rttn	1.29557	1.75032e-05		D17H6S56E-5	1.38575	5.37532e-06
Vmn1r89	1.42433	1.75099e-05		Hsh2d	2.47851	5.38105e-06
Klk1	2.20878	1.77033e-05		Gm4951	4.26015	5.44105e-06
Cxcl9	3.92137	1.79013e-05		Gbp2	2.25476	5.46568e-06
Il1rn	2.4195	1.79013e-05		Slfn4	4.98521	5.85044e-06
Oas2	3.10249	1.79013e-05		Cxcl3	4.22214	5.92262e-06
Fcgr4	1.87933	1.79013e-05		Msr1	2.94629	6.54091e-06
Tnfrsf1b	1.13086	1.81168e-05		Il6	5.45231	6.54091e-06
Tgtp1	2.3735	1.82702e-05		Eif2ak2	2.02459	6.56023e-06
Bpifa1	-3.51265	1.82702e-05		Uhrf1	2.00643	6.7109e-06
Ifih1	1.7194	1.84707e-05		Il1b	2.70723	6.86335e-06
Cd274	1.89797	1.84707e-05		Slc15a3	1.69343	6.86335e-06
Smad9	1.9406	1.87527e-05		Plac8	2.59425	6.97678e-06
Olfr398	1.4006	1.87527e-05		Tmem173	1.08424	7.38294e-06
H2-T24	1.77698	1.88954e-05		Cxcl1	3.59236	7.88563e-06
Plac8	2.0076	1.90204e-05		C1ra	1.14973	8.42121e-06
Per3	1.27742	1.92078e-05		Ms4a6c	3.20703	8.63846e-06
Otud3	-1.27555	1.94558e-05		Nrn1	-2.21944	8.75496e-06
Clec4e	1.99277	1.98633e-05		Oas2	3.38525	8.98905e-06
Cyp4a14	1.09646	2.01628e-05		Clec4e	3.21433	9.24126e-06
Spag4	-1.08067	2.02472e-05		Apoc2	2.34279	9.41547e-06
Mefv	2.23856	2.12056e-05		Neto1	2.03692	9.58629e-06
Oas3	3.59914	2.12056e-05		Fcgr4	2.97193	9.58629e-06
Sebox	1.17429	2.19176e-05		1100001G20Rik	1.82202	9.58629e-06
Nampt	1.33503	2.21996e-05		Fanci	1.56298	9.69745e-06
C130026I21Rik	2.25527	2.23321e-05		Ifi202b	3.76218	9.76735e-06
Il6	4.43984	2.23321e-05		9130017N09Rik	2.24965	9.76735e-06
Chad	-1.86624	2.23321e-05		H2-Q5	1.21555	9.87346e-06
Gm4951	3.60094	2.2367e-05		Cd7	1.71848	1.01397e-05
Sp100	1.59432	2.23749e-05		Ccr9	2.03243	1.01397e-05
E130119H09Rik	1.04588	2.38274e-05		Tnfrsf1b	1.667	1.01397e-05
Tssk6	1.75184	2.38366e-05		Cfb	2.45976	1.02944e-05
Psmb10	1.04268	2.52082e-05		Spats2l	1.8482	1.02944e-05
Theg	1.34827	2.57229e-05		Gabra4	-1.74457	1.0306e-05
Klk1b4	1.56714	2.57229e-05		Ly6e	1.69723	1.0364e-05
Spats2l	1.58458	2.58342e-05		Zc3hav1	1.80856	1.10744e-05
Parp9	1.58182	2.61043e-05		Dhfr	1.68847	1.10744e-05
Ifit2	2.75368	2.61043e-05		Kif20a	1.37216	1.11962e-05
2210407C18Rik	4.99982	2.80359e-05		Slco4a1	1.43426	1.11962e-05
Slfn4	4.33192	2.82643e-05		Mmp8	2.23578	1.12644e-05
Tff2	-3.0847	2.82643e-05		Isg20	1.72621	1.12644e-05
Zc3hav1	1.54319	3.07539e-05		Klk1b4	2.38663	1.13113e-05
Clec4g	-2.04325	3.07539e-05		3300002A11Rik	-1.92398	1.13113e-05
Ifi202b	3.04122	3.07539e-05		Gbp1	2.55885	1.16152e-05
Ms4a6c	2.29639	3.12134e-05		Gm11127	1.33611	1.1618e-05
Slc13a4	1.52574	3.12134e-05		H2-Q7	1.21855	1.1976e-05
Gm12250	2.72994	3.12134e-05		Surf4	1.06601	1.1976e-05
Gpr37l1	1.87725	3.17351e-05		Cxcl11	8.76002	1.22008e-05
Iigp1	2.88998	3.33932e-05		Slc7a8	1.12186	1.25511e-05
C330018A13Rik	1.02456	3.55929e-05		Sp100	1.56414	1.26105e-05
Hspb9	1.25896	3.6227e-05		Pyhin1	3.22414	1.29989e-05
Saa3	3.96731	3.64316e-05		Plac9	-1.00817	1.30905e-05
Tnf	1.66887	3.64316e-05		Trim34a	1.58341	1.34782e-05
Lgals2	1.61045	3.78515e-05		Mcm3	1.09104	1.34782e-05
Gpr84	2.25615	3.86269e-05		Saa4	3.25933	1.34796e-05
Cxcl11	7.75261	3.88376e-05		Mastl	1.69005	1.35064e-05
BC021785	1.02491	3.92646e-05		Gm14446	3.40053	1.35064e-05
Sp110	1.24098	3.93124e-05		Nampt	1.35103	1.36057e-05
1810009N02Rik	-1.67992	3.99788e-05		Ric3	-1.19583	1.37574e-05
Gm18756	-1.93575	3.99788e-05		9930023K05Rik	3.46741	1.37574e-05
Glo1	1.13166	4.26834e-05		C130026I21Rik	2.61815	1.43389e-05
Ric3	-1.33273	4.47824e-05		A530032D15Rik	3.07923	1.44906e-05
Adam5	-1.36086	4.54115e-05		Mefv	3.05681	1.48145e-05
Slc25a34	1.0299	4.54115e-05		Grik2	-1.84855	1.48145e-05
Ddx60	3.08893	4.60078e-05		Ms4a8a	1.08415	1.48145e-05
Olfr1044	1.01523	4.63315e-05		Agtr2	-2.14811	1.48145e-05
Serpinb9e	1.05669	4.67537e-05		Clec4a3	1.78574	1.52226e-05
Psmb8	1.25472	4.84957e-05		Irf9	1.52869	1.52226e-05
Kcne1	1.50032	4.85913e-05		Klra16	1.95665	1.60493e-05
Duoxa2	1.05665	4.85913e-05		Nlrc5	2.37701	1.60595e-05
Cxcl1	2.79386	4.86657e-05		Slc26a4	2.53813	1.60595e-05
9130017N09Rik	1.47711	4.91632e-05		H2-T23	1.20434	1.60595e-05
Gbp1	1.81676	5.10177e-05		Gpr65	1.82469	1.60595e-05
Olfr229	1.70385	5.19126e-05		Tgtp1	2.98024	1.60595e-05
Olfr1221	1.97411	5.19126e-05		Slfn2	2.49076	1.60595e-05
Pira2	2.53318	5.19126e-05		2210407C18Rik	4.81975	1.60595e-05
Olfr1537-ps1	1.07187	5.24705e-05		2310043J07Rik	2.43967	1.63949e-05
Cfb	1.83044	5.61034e-05		Pttg1	1.63127	1.65316e-05
Oas1b	1.78251	5.7138e-05		Tmem106a	1.51792	1.66644e-05
Mlkl	1.50016	5.7521e-05		Slc7a5	1.56352	1.66644e-05
LOC100504178	2.10967	5.75822e-05		Ddx58	2.033	1.67913e-05
Olfr740	1.4539	5.8284e-05		Irgm1	2.7093	1.67913e-05
Tm4sf1	-1.461	5.99107e-05		Prnd	-1.48616	1.67913e-05
Gm5784	1.48745	6.07394e-05		Prss46	3.08408	1.69098e-05
Gabra5	1.21526	6.34829e-05		Ifi44	4.55098	1.69657e-05
Fam26f	2.74363	6.34829e-05		Dtl	1.96352	1.69786e-05
Gh	1.44015	6.34829e-05		Lair1	2.19107	1.76013e-05
Aif1	2.00032	6.44688e-05		Brca1	1.48358	1.76818e-05
C4b	1.04955	6.55084e-05		Tk1	1.43203	1.79814e-05
Slc27a6	1.64501	6.55084e-05		Slfn1	3.4216	1.80508e-05
Prss33	1.03778	6.56348e-05		Gla	1.32017	1.80909e-05
Hlf	1.76481	6.89851e-05		Fam26f	4.23977	1.82486e-05
Trim12a	1.91873	7.19771e-05		Mab21l3	2.50502	1.84044e-05
Ldlr	1.15982	7.25579e-05		Mlkl	2.15724	1.84484e-05
Olfr319	1.27138	7.33765e-05		D430006K04	1.52488	1.85755e-05
Slfn1	2.46386	7.33765e-05		Cenpe	1.44787	1.86635e-05
A430071A18Rik	-1.52289	7.35381e-05		Tap2	1.57451	1.87811e-05
Gm9975	1.12126	7.45756e-05		Vcan	2.11476	1.87811e-05
Olfr969	2.51302	7.60007e-05		Tff2	-3.42084	1.89911e-05
Ifi44	4.24196	7.65841e-05		Klra2	2.61244	1.91652e-05
Prnd	-1.3482	7.72373e-05		Apod	3.09433	1.9334e-05
Olfr15	1.26371	7.74928e-05		Bcl2l15	2.0535	1.9334e-05
Chit1	4.15891	7.85832e-05		Bpifb1	-2.03285	1.9334e-05
Nrn1	-2.07421	7.91362e-05		Sgol2	1.40713	1.9729e-05
Hist1h1t	1.95132	7.91362e-05		Ifng	4.30982	1.98278e-05
Apol9b	3.43679	7.95118e-05		Birc5	1.81251	1.98278e-05
Fga	1.79127	7.95118e-05		Slc38a4	-1.46823	2.01235e-05
Saa2	2.68306	7.97518e-05		Psmb8	1.82987	2.06584e-05
Rps6ka6	-1.30566	7.98073e-05		Ddx60	3.36396	2.06772e-05
Trafd1	1.07557	8.13552e-05		Lag3	2.11533	2.06772e-05
Tymp	-1.08589	8.82141e-05		Rasgrf1	-1.36653	2.06772e-05
Scn3b	-1.99715	9.53737e-05		Apobec1	2.35454	2.06772e-05
9330182L06Rik	1.55044	9.53737e-05		Mcm10	1.97233	2.06772e-05
Cyp3a16	1.34256	9.75509e-05		Ly6i	1.70907	2.06772e-05
Olfr56	1.40034	9.77427e-05		Ptafr	1.71631	2.06826e-05
Cd177	1.30438	0.000101063		Nek2	1.23936	2.19625e-05
Klk1b27	2.16075	0.000101063		H2-D1	1.23496	2.2023e-05
9930023K05Rik	2.85211	0.000102554		Epsti1	2.3735	2.24715e-05
Sectm1b	1.90365	0.000104972		Tnf	2.64184	2.25063e-05
Olfr59	1.14129	0.000104972		Sp110	1.44084	2.31002e-05
Ggt5	1.14143	0.000105523		Gm9975	1.36437	2.31204e-05
Apobec1	1.79562	0.000110056		Iigp1	3.37579	2.35458e-05
Olfr368	1.32284	0.000111946		Klra23	1.81781	2.36067e-05
Rasl11a	-1.37866	0.000114468		H2-K2	1.25104	2.36067e-05
Cdh26	-1.53423	0.000119234		Dlx6	1.04728	2.38215e-05
1700016A09Rik	1.24725	0.000121618		Scn3b	-1.91341	2.38811e-05
Cyp2c37	1.60795	0.000124601		Ifi35	1.2284	2.38811e-05
St6gal2	1.3393	0.000124601		Ifitm3	1.43135	2.38811e-05
D17H6S56E-5	1.3159	0.000124601		Gbp7	2.16851	2.38811e-05
LOC639910	1.33798	0.000126311		Tacc3	1.36568	2.38811e-05
Ghsr	1.03304	0.000127327		Gvin1	1.73297	2.38811e-05
Csprs	2.33787	0.00012742		C4b	1.21382	2.39676e-05
Fads6	1.14788	0.00012742		H2-Q2	1.18863	2.39676e-05
2210415F13Rik	2.75743	0.000127643		Mpeg1	1.41883	2.41967e-05
Gif	-1.91887	0.000129505		Daxx	1.84797	2.41967e-05
Trem1	1.74197	0.000129505		BC020535	-1.17398	2.41967e-05
Esr2	-1.19705	0.000129505		Psmb9	1.53158	2.41967e-05
Slc7a5	1.10207	0.000131785		Hmga1	1.09838	2.41967e-05
E230025N22Rik	1.59214	0.000137851		Tap1	2.46568	2.41967e-05
Vmn1r42	1.14461	0.000139216		Raet1a	1.29401	2.49388e-05
Hoxa6	1.15125	0.000139728		Ly6a	1.44126	2.55235e-05
Cpa1	-1.40179	0.000140651		Ccl9	1.57533	2.55235e-05
Ms4a6b	1.60114	0.000143038		C3ar1	2.01969	2.55826e-05
Mthfd1l	1.39021	0.000143038		Krt17	1.75169	2.55894e-05
Atcay	1.76541	0.000143038		Pydc4	1.82417	2.57053e-05
Dlx6	2.0627	0.000146444		Lcn2	2.06408	2.58216e-05
Gdpd2	-1.38025	0.000147818		5430427O19Rik	1.99931	2.63469e-05
Tap1	1.48635	0.000148057		Egfbp2	2.13155	2.65317e-05
Npnt	1.29895	0.000148246		Trem3	2.08212	2.66143e-05
Socs3	1.39009	0.000148246		BC013712	2.02261	2.66418e-05
Slc26a4	2.09951	0.000148246		Batf2	2.31811	2.66418e-05
Muc4	1.25048	0.000149764		Ccl8	2.99607	2.67525e-05
Mthfd2	1.64671	0.000151946		Lama3	-1.04624	2.68815e-05
Slc25a29	1.30852	0.000152094		A430071A18Rik	-1.12674	2.71892e-05
Gvin1	1.50696	0.000155425		1700045I19Rik	-1.26627	2.81453e-05
Egfbp2	1.28076	0.000157355		Lst1	1.46768	2.81453e-05
Heatr7b1	1.32716	0.000157852		Ccr5	3.24294	2.81453e-05
2210404J11Rik	1.01523	0.000163383		Il2rb	2.07026	2.81453e-05
Olfr1240	1.41656	0.000164644		Selp	1.3504	2.91426e-05
Olfr259	1.29091	0.000164644		Ifi47	2.33173	2.9292e-05
1700019G17Rik	1.2594	0.00016807		Csprs	3.02713	3.03823e-05
Hist1h2be	-1.25928	0.000172452		Slamf7	1.95396	3.05235e-05
Ifi47	1.57619	0.000174519		Apol9b	3.68021	3.11969e-05
Tap2	1.17155	0.000175589		Gm1966	1.99412	3.14219e-05
Agtr2	-1.81566	0.000176225		Chit1	4.34615	3.17749e-05
Gm14920	1.13179	0.000176825		Gm8995	1.62681	3.20567e-05
Apod	2.8471	0.000176825		Rps6ka6	-1.13205	3.2188e-05
Klra16	1.16297	0.000178315		Klk1b8	1.57996	3.2188e-05
Rab6b	-1.06957	0.000178315		Hist1h1d	1.47881	3.25051e-05
Gm1966	1.53469	0.000179505		Rgs1	3.00921	3.26721e-05
1700021F07Rik	1.05836	0.000181482		Ms4a4d	1.94096	3.26721e-05
Olfr1269	1.42807	0.000181594		Irf8	1.31829	3.2802e-05
Mpeg1	1.07135	0.000182491		Lilrb4	2.3602	3.28194e-05
4930401B11Rik	1.30884	0.000184505		H2-Bl	1.42143	3.32385e-05
1100001G20Rik	1.39525	0.000184505		Trnp1	-1.26246	3.35735e-05
Insm2	1.68494	0.000184505		Tlr2	1.32768	3.36094e-05
Lama3	-1.48558	0.000184505		Fyb	1.72028	3.36094e-05
Gm12541	1.03629	0.000187074		Mctp2	1.3345	3.38715e-05
Gm5431	1.34258	0.000193572		Tppp	-1.00706	3.41457e-05
Tmem130	1.08903	0.000194403		Oas1b	1.94633	3.41457e-05
B230217C12Rik	1.22887	0.000194403		Glo1	1.16972	3.46305e-05
Trim34a	1.32126	0.000194651		Clec4g	-2.12075	3.46305e-05
Il12b	1.87065	0.000195414		Cxcr2	1.59787	3.46305e-05
Klra2	1.56699	0.000195917		Kif20b	1.02296	3.48235e-05
Gm1631	2.47029	0.000196217		Cyp7b1	1.11933	3.48235e-05
2810025M15Rik	-1.10702	0.000196597		Clec2g	1.09399	3.55486e-05
Rgs1	1.76279	0.000197701		Cdkn3	1.68352	3.55486e-05
Mnda	1.82021	0.000198853		Parp12	1.60214	3.55486e-05
Aldh1b1	1.59495	0.000198853		Muc4	1.10297	3.60626e-05
Slc2a6	1.17002	0.000198853		Cd72	2.19382	3.60923e-05
Il3ra	1.03342	0.000198853		Klra15	1.91734	3.6914e-05
Ifi205	1.90315	0.000202489		Cacna1b	-2.35039	3.6914e-05
Scn10a	1.34975	0.000210543		Prmt8	-1.9423	3.76247e-05
Gpr65	1.28172	0.000210543		Esr2	-1.64667	3.83836e-05
Olfr554	1.03609	0.000210543		LOC639910	1.78388	3.85242e-05
5330439M10Rik	1.04828	0.000210696		Cd274	2.8101	3.8713e-05
Nol4	1.07225	0.000210696		Cdt1	1.21751	3.8713e-05
3300002A11Rik	-1.26651	0.000212835		Vcam1	1.16459	3.93879e-05
A430010J10Rik	1.70811	0.000213993		Gm5431	1.92879	3.93879e-05
Cxcl3	2.65341	0.000213993		Gatm	1.50359	3.9409e-05
Olfr1	1.12687	0.000218629		Cenph	1.65291	3.9409e-05
Bcl2l15	1.39288	0.000221058		Gpt	-1.10045	3.97902e-05
Cst13	1.13353	0.000221058		Phlda2	-1.10226	3.97902e-05
Dhfr	1.348	0.000224184		Mgat4a	1.33547	4.01147e-05
Isg20	1.13667	0.000232483		Ifi203	1.72557	4.10468e-05
1700029M20Rik	1.18345	0.00023424		Ccna2	1.35994	4.13333e-05
Esm1	-1.28227	0.000238628		Ppp1r14d	1.15111	4.13333e-05
Msr1	1.59911	0.000240536		Cd14	1.20264	4.13915e-05
Grip2	1.50195	0.000242352		Cep55	1.75812	4.13915e-05
Zmat4	1.10669	0.000243814		Cdca5	1.85417	4.17905e-05
BC028528	-1.29271	0.000243814		Tmem146	-1.46322	4.20117e-05
Gm17473	1.12565	0.000243814		C2	1.19626	4.2791e-05
Ly6e	1.01636	0.000247058		Cyp4a12a	-1.1989	4.31691e-05
Prtg	1.33587	0.00024859		Gpr176	1.58327	4.32318e-05
Ccr5	1.96512	0.000252536		Socs1	2.605	4.36735e-05
Krt75	1.03902	0.00025278		Gm16485	-1.41379	4.36741e-05
Gbp8	1.59584	0.000254867		Sgol1	1.50934	4.37663e-05
Gzmb	1.90303	0.000257978		Scgb3a1	-3.33228	4.37663e-05
Spdya	1.87105	0.000258749		Cdca3	1.57259	4.37663e-05
Tcte3	1.1029	0.000258749		Ms4a6b	2.30677	4.39968e-05
Olfr1451	1.10161	0.000273486		2210411K11Rik	1.0907	4.43747e-05
Slc45a2	1.10308	0.000274318		Bpifa1	-3.68696	4.49195e-05
Svs1	2.68313	0.000274318		Eme1	1.39107	4.49195e-05
Cpa3	-1.88475	0.000274586		Melk	1.69979	4.5161e-05
Tpsb2	-1.41007	0.000274586		BC006965	-1.05556	4.5161e-05
Ccl8	1.96155	0.00027479		E330016A19Rik	1.4276	4.59119e-05
Il1b	1.627	0.00027479		Ccl20	2.31313	4.59189e-05
Fam101b	-1.57304	0.00027479		2210415F13Rik	2.68776	4.60544e-05
Olfr1163	1.05539	0.00027479		Lrrc25	1.86319	4.60796e-05
Apol9a	3.56878	0.00027479		Cdca8	1.55075	4.61163e-05
Rnase1	-1.29166	0.000277817		Parp11	1.45215	4.626e-05
Gbp7	1.41066	0.000278722		Il12rb1	1.99261	4.70339e-05
Tmem232	-1.0862	0.000278841		Pbk	1.46576	4.75437e-05
Olfr22-ps1	1.15662	0.000281687		H2-M3	1.30275	4.75753e-05
Galp	1.11104	0.000281687		Rrm2	1.92452	4.75753e-05
Hist1h2bq	-1.64712	0.000286633		Inhba	1.2998	4.75753e-05
Apol7a	2.164	0.000286933		Eomes	1.83868	4.75753e-05
Il2rb	1.39679	0.000294249		Kif4	1.08741	4.76659e-05
Spink3	1.03484	0.000298013		Cenpk	1.28873	4.8755e-05
Mycs	1.10767	0.000298013		Sdc3	1.0175	4.88647e-05
Adcyap1r1	1.70094	0.000298013		Ifi205	2.5775	4.88678e-05
Prss12	-1.20005	0.000298013		A630033H20Rik	1.22389	4.93213e-05
A930005C09Rik	1.58712	0.000298013		Cyp3a16	1.12221	4.93213e-05
Uba7	1.15019	0.000298891		Trafd1	1.25223	4.95027e-05
5430427O19Rik	1.18658	0.000299517		Baiap2l1	-1.07271	4.96903e-05
Vnn3	1.17895	0.000302922		Hcls1	1.2539	5.06818e-05
Ogfr	1.13076	0.000304809		Mmp13	1.6279	5.07193e-05
Tfpi2	-1.6848	0.00030521		Spag5	1.52362	5.07244e-05
Cyp2c44	-1.00896	0.000314296		Rad51	1.63886	5.07244e-05
Cdh6	1.30355	0.000314296		8030451A03Rik	-1.18479	5.10493e-05
C030014O09Rik	1.16711	0.000314296		Tpx2	1.4616	5.2524e-05
Rab31	-1.06344	0.000317526		Amica1	1.21825	5.2524e-05
Pdia5	-1.17596	0.000320639		Uba7	1.32269	5.30898e-05
Gm8995	1.42172	0.000320639		Aif1	2.31643	5.3406e-05
AW112010	1.26362	0.00032101		Ncapg	1.84753	5.34907e-05
1700008A07Rik	1.23942	0.000321547		Ncapg2	1.15575	5.44876e-05
2310043J07Rik	2.1636	0.000329983		Ccdc67	1.15932	5.5458e-05
Mxd4	-1.12782	0.000333788		Clec4d	1.3179	5.56977e-05
Lep	1.2702	0.000333788		H2-Q10	1.15556	5.70597e-05
Cxx1c	-1.27492	0.000334602		Mcm6	1.27616	5.70597e-05
Thbs1	1.57117	0.000336485		Samhd1	1.37222	5.77301e-05
Zfp874a	1.59177	0.000336777		Slc22a12	-1.24729	5.77301e-05
Cd3e	1.11317	0.000337922		Trip13	1.36983	5.77301e-05
AI256396	-1.35631	0.000349125		Gm4759	1.72041	5.88884e-05
Klrk1	1.39405	0.000350984		Chad	-1.85866	5.91614e-05
Orm2	1.82362	0.000350984		Noxo1	1.46815	5.91614e-05
Olfr948	1.18007	0.000350984		Ccrl1	-1.09656	5.92366e-05
Cma2	-1.44375	0.000364433		Gbp4	2.09516	5.94452e-05
Ptgs1	1.0569	0.000365087		Trim12a	1.62622	5.9897e-05
Ccnjl	-1.58698	0.000369979		Gpr84	3.54943	6.12589e-05
Trnp1	-1.15141	0.000369979		Tnfrsf9	3.19832	6.14675e-05
Rgs16	1.249	0.000369979		Pdgfrl	1.05067	6.25293e-05
Gm16485	-1.95548	0.000373606		Tmem171	1.31734	6.30442e-05
Rexo4	1.13497	0.000373606		Atf3	1.64482	6.35162e-05
D430006K04	1.17478	0.000374034		Gzmb	3.50363	6.46169e-05
Grik2	-1.37908	0.000377787		Cenpw	1.65329	6.52072e-05
Cyp4a12b	-1.42053	0.000381533		Vnn3	1.17678	6.66381e-05
Syt15	-1.50082	0.000387168		Mnda	2.00932	6.66381e-05
Prkch	-1.04162	0.000387168		Sirpb1b	2.22571	6.66381e-05
Muc15	-2.13486	0.000390692		Ccdc88b	1.0657	6.67595e-05
Tlr7	1.16007	0.000392029		Ddx4	3.22211	6.70056e-05
Cyp4a12a	-1.0143	0.000394215		Clec12b	-1.27764	6.73338e-05
4930470P17Rik	1.69987	0.000397258		Micall2	1.08816	6.93292e-05
Lair1	1.35337	0.000397258		Plekha4	1.26611	7.08816e-05
Pttg1	1.12728	0.000400596		Ptgir	1.16606	7.11954e-05
Olfr875	1.17985	0.000400596		Junb	1.06252	7.11954e-05
Ccrl1	-1.4366	0.000400596		Dlgap5	2.34256	7.12538e-05
Olfr894	1.56043	0.000400596		Gins2	1.17737	7.12538e-05
Olfr486	1.09624	0.000400596		Tnc	1.45474	7.15127e-05
Naa25	1.01229	0.000401923		Klra17	2.30376	7.1738e-05
Zfp433	-1.03565	0.000402835		Klra12	2.0708	7.1738e-05
Parp12	1.19487	0.000403773		Cenpf	1.08031	7.18403e-05
8030451A03Rik	-1.34541	0.00040713		Gm12185	2.13667	7.27184e-05
Yipf1	-1.03645	0.000409169		Brip1	1.37317	7.28028e-05
Ddx4	2.31953	0.000415522		Basp1	1.26183	7.32064e-05
Tnfrsf9	2.28094	0.000416138		Spdef	-1.08084	7.33363e-05
Fblim1	1.14223	0.000416334		Aldh1b1	1.7814	7.33363e-05
Batf2	1.47487	0.000417032		Nav3	1.37972	7.33363e-05
Cd209d	-1.21101	0.000417169		Tmsb15a	1.75973	7.33363e-05
Mab21l3	1.87492	0.000418093		Fignl1	1.58512	7.42246e-05
Olfr1211	1.3749	0.000418156		4930422G04Rik	1.23711	7.43183e-05
Dbp	1.05501	0.00041877		Hpse	1.64123	7.43183e-05
Areg	1.9006	0.00041877		Unc79	-1.62451	7.43183e-05
Socs1	2.0711	0.000425145		Slc37a2	1.44507	7.50194e-05
Cd7	1.1914	0.000433916		Kif23	1.05046	7.52766e-05
Gcg	1.35022	0.000433916		Traip	1.39439	7.61823e-05
Fbxw13	1.26119	0.000433916		B430306N03Rik	1.55845	7.65789e-05
Evi2a	1.17481	0.000436501		4930401B11Rik	1.39033	7.77902e-05
Gm2740	1.01682	0.000437934		Klrk1	2.05361	7.77902e-05
Cd180	1.04426	0.000441161		Tbc1d1	1.24782	7.79921e-05
Gpc6	-1.11098	0.000442855		Cdk1	1.54575	7.90326e-05
Fshb	1.0183	0.000442875		Asf1b	1.43513	7.90326e-05
Oprm1	1.72941	0.000444442		Gcg	2.23602	7.91691e-05
Ifitm6	1.54002	0.000449664		Hist1h1a	1.09707	7.91691e-05
Ms4a4d	1.06838	0.000449851		Exo1	1.65432	7.93461e-05
Tmem181a	-1.16893	0.000453949		Tlr7	1.76051	7.935e-05
Apoc2	1.27405	0.000461204		Evi2a	1.73538	7.935e-05
Vmn1r231	1.4218	0.00046166		Cldn4	1.75438	7.9883e-05
Olfr1391	1.26281	0.00046166		Pla2g2e	-1.70397	7.98854e-05
Olfr1348	1.22371	0.000478576		Trf	-1.04244	8.04274e-05
Krt34	-1.02084	0.000485851		Cd209b	-1.61942	8.09117e-05
2410012M07Rik	1.02827	0.00048593		Tlr3	1.39783	8.22191e-05
Pde1a	1.54617	0.000489759		AW112010	1.70997	8.25017e-05
BC020535	-1.14766	0.000493603		Ccr2	1.88609	8.27626e-05
Kif26a	-1.06116	0.000497983		Hoxa3	-1.20782	8.27626e-05
Ston1	1.32907	0.000502224		Clec4a1	1.71124	8.27626e-05
Olfr483	1.31012	0.000505949		Cdc20	1.06736	8.27641e-05
Runx3	1.00056	0.000521601		Ccnb2	1.1947	8.27641e-05
Ptpn23	-1.03624	0.000526626		Chst15	-1.56392	8.36759e-05
Glb1l3	-2.37484	0.000528287		Steap4	1.1818	8.40772e-05
Col4a3	-1.45838	0.000537346		Ifitm6	2.16765	8.46317e-05
Slc10a1	1.06928	0.000537767		Gsta3	-1.15132	8.47885e-05
Olfr411	1.18392	0.000539109		Ctss	1.22007	8.53518e-05
Gltp	-1.11084	0.00054208		Shcbp1	1.66875	8.69259e-05
Olfr450	1.21827	0.000546532		Cdc6	1.61806	8.70761e-05
Clec12b	-1.14228	0.000562537		Gins1	1.2607	8.9625e-05
Csf2	1.05386	0.000567763		Slc39a14	1.20756	9.00615e-05
Lpxn	1.15703	0.000567763		A530064D06Rik	2.4744	9.27448e-05
Qrfp	1.31956	0.000567763		Esco2	1.60891	9.30778e-05
9330175E14Rik	1.46664	0.000571773		Sts	-1.0548	9.30778e-05
Unc79	-1.29439	0.000571773		Slamf9	1.74925	9.30778e-05
Nrarp	-1.36632	0.000574608		1300002K09Rik	1.63394	9.35633e-05
A030005K14Rik	1.5283	0.000578648		Irf1	1.17413	9.36728e-05
Noxo1	1.19902	0.000579984		Tymp	-1.07958	9.52623e-05
D930030D11Rik	-1.17486	0.000583271		9630041G16Rik	1.20389	9.59638e-05
Cpn2	1.38758	0.00058539		Spc24	1.29277	9.61381e-05
Zbtb34	-1.09403	0.00058539		Vstm2a	-1.10416	9.64239e-05
2310002F09Rik	-1.43032	0.000586133		Gm10914	-1.19929	9.71836e-05
Sva	1.36313	0.000586133		Hmmr	1.38597	9.71836e-05
4922501L14Rik	1.06334	0.000586133		Lpxn	1.73267	9.74602e-05
Rhbdl2	1.35308	0.000596076		Pml	1.06846	9.74602e-05
Pou3f1	1.8328	0.000607634		Mcm5	1.35177	9.76231e-05
Fam3b	-1.05981	0.000611436		Fanca	1.35628	9.79571e-05
Ccl24	-1.03538	0.000611436		Klf4	-1.42614	9.82877e-05
Gbp9	1.25081	0.000615202		Ccnb1	1.55368	9.86916e-05
4930568D16Rik	1.06523	0.000615412		Spp1	1.20726	9.86916e-05
Aspn	-1.13303	0.000626071		9930111J21Rik2	1.8613	9.86916e-05
Lcn2	1.03506	0.000637688		Fcgr2b	1.61504	9.86916e-05
Slamf9	1.09037	0.000650356		Znfx1	1.50124	9.86916e-05
Npy2r	-1.40113	0.000664166		Gbp8	2.30212	0.000101454
Olfr1093	1.09285	0.000672498		Ccne1	1.67511	0.000102346
Id3	-1.06569	0.000680258		Rgs16	1.68109	0.000102732
Gstm3	-1.24935	0.000681028		Arl5c	1.40194	0.000102732
9230104L09Rik	-1.66818	0.000683906		Dscc1	1.61511	0.000103837
Plekha4	1.2346	0.000687635		Neurog1	-1.68362	0.000105389
Krt17	2.12261	0.000696233		Rttn	1.15966	0.000105613
Psma8	-1.05874	0.000732749		E130006N16Rik	-1.05847	0.000105737
F2rl3	1.00541	0.000738602		1810046K07Rik	-1.30884	0.000106319
Nav3	1.12458	0.000747281		H2-M2	1.24521	0.000106319
Gm9960	-1.68539	0.000749481		Slamf8	1.67523	0.000106549
Tmc5	1.46112	0.000749481		D2Ertd750e	1.17988	0.000106681
Olfr48	1.42783	0.000749481		Meg3	-1.12843	0.000106733
Tcn2	-1.65237	0.00075068		Gstm3	-1.36685	0.000106733
Grp	-1.72516	0.00075068		Baiap2l2	-1.16105	0.000107174
Gm12185	1.368	0.000751441		Suv420h2	-2.18748	0.000108167
Pltp	-1.48042	0.000763475		F10	1.38066	0.000108489
Vcan	1.40414	0.000770798		Klrc2	1.09585	0.000109058
Mitd1	1.05947	0.000778124		Sox17	-1.07814	0.000110231
Olfr1394	1.01365	0.000806673		Nmral1	1.33348	0.000111748
Oas1c	1.05411	0.000811651		Maml3	-1.1892	0.00011409
Mrgpra2b	1.55117	0.000815768		Gzma	1.27735	0.000114622
Rnase6	1.25259	0.000815768		Mki67	1.17271	0.00011993
Ccl20	1.47151	0.000824234		4933439C10Rik	-1.05248	0.00011993
Bhlhe22	-1.42486	0.000833194		Fcer1g	1.49337	0.000120646
Cd300lf	1.30437	0.000844925		Thbs1	1.44784	0.000120679
Xdh	1.1976	0.00085629		Treml4	1.04527	0.000120679
H2-T22	1.29266	0.00087488		Prss33	1.06118	0.000121569
Parvb	-1.18165	0.00087488		Bmp6	-1.29456	0.000122448
Tmem26	-1.37136	0.00087488		Il10ra	1.60848	0.000122448
Ifi27l2b	2.49974	0.000887384		Elf5	-1.17088	0.000122478
Cd209a	-1.50222	0.000890205		Nusap1	1.33511	0.000122765
Gp2	-2.72161	0.000890205		2022-03-01	1.43925	0.000122771
4921507G05Rik	1.09186	0.000891136		Hist1h2bq	-1.38704	0.000123507
AU021092	-1.26259	0.000891136		Slc11a1	1.20022	0.000124531
Ccdc42	-1.3248	0.000900257		Gm5547	1.75878	0.000124531
1700105P06Rik	1.07145	0.00090263		Wnt10b	-1.07437	0.000124531
Dmkn	-1.00549	0.00090597		Rgs11	-1.01592	0.000126336
Lilrb4	1.12264	0.00090794		Parp9	1.76238	0.000126336
Lrrc25	1.00525	0.00090794		Plk5	-1.54321	0.000126336
Hmga1	1.13877	0.00090794		Spc25	1.21776	0.000128113
Maml3	-1.04882	0.000919914		Glb1l3	-2.19805	0.000129087
4930533L02Rik	1.3006	0.000923852		Pstpip1	1.2694	0.000129166
Hormad1	-2.48438	0.000923868		Lgals2	1.50675	0.000129166
Pcdha6	1.02804	0.000925452		Gdap10	1.07664	0.000129166
Aqp6	1.20287	0.00092565		Fgr	1.41396	0.000129315
Usp14	1.09539	0.000927023		Siglech	1.20554	0.000129315
Kcnh3	1.07605	0.000927023		Scube1	-1.28627	0.000129842
Slc6a20b	1.22382	0.000927854		Ncf4	1.38353	0.000130128
Pydc4	1.24128	0.000927854		Aurka	1.28888	0.000130128
Sh3gl2	-1.10817	0.000927854		Kif11	1.39427	0.000131606
Frem2	1.024	0.000928085		Ly9	1.32422	0.000131832
Il28b	1.10157	0.000933057		Trim21	1.2279	0.000132559
Col6a5	-1.38922	0.000937055		Tnfaip6	1.4694	0.000133968
1700022A21Rik	1.34189	0.000940469		Gzmc	4.3021	0.000134609
Olfr508	1.13437	0.000949026		Tbx1	-1.20546	0.000134609
6230409E13Rik	1.19106	0.000958854		Bcl2a1b	1.33176	0.000135192
3110047P20Rik	1.17525	0.000958854		Niacr1	1.01259	0.000135854
Cd72	1.17777	0.000960577		Plk1	1.25724	0.000137383
Btnl9	1.17398	0.00096812		Vpreb3	-1.045	0.000137383
Daam2	-1.25908	0.000971298		Slc6a15	-1.36662	0.000138112
Ankrd22	1.80531	0.00097442		Mesp1	-1.33588	0.000138112
Cypt9	1.74414	0.000982316		Gck	-1.11443	0.000144127
Glis1	-1.39721	0.000982452		Ifi27l2b	2.51017	0.000145147
Casp4	1.21234	0.000988543		Poc1a	1.4091	0.000145668
1700102P08Rik	-1.46189	0.000990594		A430084P05Rik	1.80244	0.000145937
Sec14l1	-1.10763	0.000994986		Kif22	1.30205	0.000146536
Rab25	-1.01158	0.00100174		Entpd8	-1.15068	0.000146536
C1qtnf3	-1.9124	0.00100696		Mitd1	1.41924	0.000148293
Slc28a2	1.15025	0.00100825		Serpine1	1.35043	0.000148293
Srms	-1.11345	0.00100995		Rab6b	-1.50534	0.000148699
Rnf144a	-1.37094	0.00101029		Ogfr	1.19672	0.000149898
Gatm	1.07493	0.00101093		Apol9a	3.70217	0.000150374
Bcl11a	1.06882	0.00101776		Slc2a6	1.91283	0.000151275
Cyth3	-1.43439	0.00102984		Gpr141	2.26937	0.000151693
T2	-1.01019	0.00102984		Nuf2	1.44335	0.000151704
4930402F06Rik	1.293	0.00104548		Retnlg	1.80147	0.000151843
Gm5547	1.04089	0.00105262		Aspm	1.10106	0.000151843
6530439I21	1.01667	0.00106103		Ppp2r2c	-1.31831	0.000152643
Reep6	-1.08804	0.00106356		Mad2l1	1.11651	0.00015311
Cldn22	-1.75622	0.00106356		Pou3f1	2.41849	0.000154869
1700025F22Rik	1.25127	0.00107325		Ccl5	1.24087	0.000156855
Il12rb1	1.60736	0.00107389		Cenpm	1.52752	0.000156855
Etnk1	1.03288	0.00107571		Clec7a	1.31416	0.000158689
Wfdc1	-1.11112	0.001079		Gbp9	1.85117	0.000159578
Olfr218	1.39652	0.00108224		Ptpn23	-1.03309	0.000159778
Akr1c18	-2.41059	0.00109488		Pla2g7	1.19517	0.000160997
Ifi203	1.3439	0.00111392		Crtam	1.42746	0.000160997
1700049E15Rik	1.56279	0.00113095		Tapbpl	1.00848	0.000160997
Sirpb1b	1.17027	0.00113161		Morc1	1.6221	0.000164306
Nlrc5	2.07601	0.00115195		Tlr6	1.12275	0.000165964
Upp1	-1.76087	0.00115659		Chek1	1.25329	0.00016724
Olfr895	1.11952	0.00117171		Socs3	1.58276	0.000167376
E030010A14Rik	-2.14651	0.00117171		Klri2	2.07328	0.000167836
Il1a	-1.12554	0.00117171		Lgals9	1.08253	0.000172879
Trmt61b	-1.73074	0.0011761		Orm2	1.93896	0.000173966
Dnahc8	1.7926	0.00117805		Hist1h3a	1.904	0.000174499
Fpr-rs3	1.02742	0.00117982		Irf5	1.21023	0.00017511
Arhgap28	-1.15832	0.00119243		Tnfaip3	1.08143	0.00017511
A530064D06Rik	1.70172	0.00119376		Ska1	1.74905	0.00017511
Eomes	1.27484	0.00121288		Gpr162	1.24893	0.000176666
Pde4b	-1.207	0.00122989		Rfc5	1.08839	0.000176941
4833419E13Rik	-1.38455	0.00123196		Runx2	1.16555	0.000176941
Atoh8	-1.19906	0.00123454		Casc5	1.45832	0.000177401
Ces2b	-1.4635	0.00123473		Npy2r	-1.35489	0.0001788
Gzmc	2.93182	0.00123554		Selplg	1.02836	0.0001788
Taar2	1.27289	0.0012547		H2-D4	1.06773	0.000178853
Fam189a2	-1.42033	0.0012547		Itgam	1.27028	0.000178952
Copg2as2	-1.74138	0.00128856		Tnfsf14	1.04953	0.000183769
Cldn4	1.88931	0.00129077		Trim12c	1.12917	0.00018463
Tulp1	1.02707	0.00129887		Cd300lf	1.84708	0.000185471
Adcy5	-1.00703	0.00131502		Spn	1.19803	0.000185471
Dnaic2	1.43364	0.00137054		Tnip3	3.62333	0.000186782
Olfr385	1.00648	0.00138129		3100002H09Rik	1.62285	0.00018732
Rps6ka2	-1.25728	0.00138223		Lypd2	-1.14471	0.000187914
Postn	-1.1213	0.00138223		Lrg1	1.10351	0.000187914
Proz	1.09226	0.0013875		Prss12	-1.01064	0.000188073
Olfr641	1.86871	0.00139145		Klrb1f	1.27009	0.000188429
Gm4651	-2.14016	0.00139816		Mt2	1.03311	0.000188429
Fez1	-1.27685	0.00141009		Prr11	1.434	0.000188429
Arntl	-1.43475	0.0014169		Rnase6	1.76233	0.000188429
Neu3	1.2192	0.00143922		Lcp2	1.50894	0.000188477
Cyp2d12	-1.02658	0.00144808		Grp	-1.76479	0.000189603
Nudt18	-1.02506	0.00144921		Serpina3n	1.70581	0.000192691
1700121I08Rik	1.72096	0.00146646		Dusp2	1.83217	0.000193455
Myct1	-1.1859	0.00146646		Fxyd4	1.00459	0.000195894
Rgs20	2.32501	0.00149496		Igsf6	1.44012	0.000198712
Gpihbp1	-1.32073	0.00149757		Zufsp	1.12788	0.000199399
Klra17	1.09827	0.00149908		Cenpp	1.10749	0.000201045
D630029K05Rik	-1.30776	0.00152994		Plcxd3	-1.0242	0.000202532
Olfr661	1.50978	0.00153089		Nat3	-3.2948	0.000203782
Synpo2l	1.02902	0.0015349		Ubd	3.15875	0.000203782
Sorbs3	-1.2178	0.00154485		Casp4	1.6527	0.0002049
Mcoln2	1.14161	0.00155843		Clec2i	1.11731	0.000205434
Scube1	-1.3926	0.00156649		Ifitm7	1.11418	0.000206658
Glrp1	1.48469	0.00156649		Snhg11	-1.18438	0.000206738
Olfr1393	1.07702	0.00156652		Tnfaip2	1.05662	0.000206738
Notch4	-1.12799	0.00158164		Mmp19	1.3274	0.000206738
Psmb9	1.04659	0.00158648		Hs3st3a1	-1.31439	0.000207777
Chi3l4	-1.81302	0.00158648		Cd300ld	1.34516	0.000208608
Agxt2l1	1.65314	0.00158648		Ube2l6	1.21948	0.00021051
Jup	-1.21233	0.00160143		Ckap2	1.04007	0.000211027
Ccl21a	-1.57302	0.00161129		Tmem212	-1.04272	0.000213568
Tulp2	-1.22083	0.00162451		Ass1	1.37298	0.000214843
Apbb1	-1.04947	0.00162451		Apol10a	1.32751	0.000215518
Klra7	1.20451	0.00163818		P2rx6	-2.2311	0.000217417
Ptprm	-1.20871	0.00163889		Gadd45g	1.06942	0.000218978
Fgg	1.38138	0.00165212		Plau	1.3675	0.000223682
LOC100043315	1.14674	0.00166424		5830416P10Rik	1.27521	0.000224379
Pxdn	-1.30297	0.00166637		Cyp4a12b	-1.49851	0.00022919
Cd209f	-1.43657	0.00167931		2310031A07Rik	1.96011	0.00022919
5430402P08Rik	-1.22519	0.00168736		Ncr1	1.08231	0.000230041
Fbxw14	1.6686	0.0016885		Ly86	1.11267	0.000233507
Avpr1b	1.98272	0.00168982		Ube2c	1.31853	0.000236811
Ppy	-1.11456	0.00170504		1700024G13Rik	-1.26902	0.000238233
Gap43	-1.18629	0.00171615		Ms4a4b	1.70291	0.000238505
Acsf2	1.04364	0.001717		Gzmk	2.98148	0.000241132
Vsnl1	-1.42797	0.00172089		Hist1h2ai	1.25963	0.000241132
3010033K07Rik	-2.2459	0.0017337		Rhoh	1.26771	0.000241266
Chst15	-1.13103	0.0017337		Fasl	1.49173	0.000243943
Vmn2r45	1.1728	0.00174841		Ambp	1.91245	0.000243943
Nfix	-1.12971	0.00175042		Zfp219	-1.00385	0.000243943
Aard	-1.54172	0.0017668		Lat2	1.5861	0.000247821
Fmo6	-1.04888	0.00177197		Hist1h1b	2.06315	0.000249383
Gm4759	1.34797	0.00178689		Cd300a	1.40845	0.000249384
Olfr1180	1.194	0.00178689		Naa25	1.25449	0.000250713
Ddah1	-1.29421	0.00179578		Spic	1.25672	0.000250853
Lhx2	1.93075	0.00179882		9530026P05Rik	-1.02899	0.00025106
Shank3	-1.11981	0.00181682		Cd52	1.24299	0.000254322
Cd209c	-1.27109	0.00183164		Hmcn1	-1.13305	0.000254534
Hamp2	1.63279	0.00185618		B3gnt4	-1.18016	0.000255571
Hs2st1	-1.02745	0.00186221		Cd180	1.39611	0.000255942
Nrg2	1.93753	0.0018797		Lhx2	2.99425	0.000255973
1700084M14Rik	1.33028	0.00189977		Clspn	2.07109	0.000256156
Cldn26	1.10336	0.0019067		Sell	1.35232	0.000257902
Acads	-1.09135	0.00192126		Tapbp	1.21425	0.000258518
Cd69	1.49533	0.00192323		Ccdc42	-1.07277	0.000262518
Usp42	1.01879	0.00193807		Prc1	1.05311	0.000262657
Avil	-1.18378	0.00195891		Heatr7b1	1.03766	0.000264171
Calcrl	-1.47472	0.00198158		Cdh26	-1.48543	0.000267619
Mtss1l	-1.14832	0.00198275		Diap3	1.11519	0.000267619
Lhfp	-1.2144	0.00200205		Areg	1.90807	0.000277139
1810046K07Rik	-1.29526	0.00200505		Cd69	2.3235	0.000278083
Mael	1.40193	0.00202187		9330175E14Rik	2.00048	0.000278083
Hmcn1	-1.12778	0.00202565		Cyp2c44	-1.22898	0.000280974
Cxcl13	1.0318	0.00203717		Tifab	1.11392	0.000280974
Gpr141	1.36048	0.00204171		Col6a5	-1.23236	0.000281782
Pla2g5	2.95868	0.00205168		Nod2	1.05717	0.000284272
Erdr1	1.22814	0.00205168		Nt5c3	1.0992	0.000287951
Wfdc12	-1.06507	0.00205312		AI662270	1.41629	0.000287951
Ubd	2.68671	0.00205508		Il28b	1.34115	0.000291352
Olfr1106	1.11463	0.00205508		4930547N16Rik	1.68322	0.000295112
Chst2	-1.38486	0.00205701		Oas1e	1.18136	0.000295402
Gchfr	-1.01523	0.00205701		2610002D18Rik	1.80144	0.000297329
Iqcf5	-1.11388	0.00205833		Ckap2l	1.04018	0.000299299
Lrrtm1	1.11725	0.00206355		LOC100504178	1.20688	0.000299299
Tmcc2	-1.32901	0.00207756		Car13	1.44765	0.000306483
Olfr693	1.1735	0.002084		P2ry13	1.28997	0.000306483
Fam162b	-1.00783	0.00212439		Otud3	-2.39336	0.000308693
D10Wsu102e	1.07343	0.00212675		Prrt1	-1.15136	0.000308693
1700028J19Rik	-1.02385	0.00213524		Samsn1	1.30587	0.000312207
Fgf15	1.31577	0.00215217		Hepacam2	-1.16717	0.000316118
9530076L18	1.34364	0.00218077		2700099C18Rik	1.05993	0.000317077
Egr1	1.61421	0.00218282		9530076L18	1.81365	0.000317077
Nova1	-1.06526	0.0022316		F630043A04Rik	1.30119	0.000317314
Cav2	-1.02054	0.00223285		Tmem232	-1.1238	0.000319151
Olfr786	1.21325	0.00225334		Hist1h2ab	1.20426	0.000322489
Serpina1b	-1.34094	0.00226198		Rps6kl1	-1.05817	0.000322853
Abcb1a	-1.50663	0.00228466		Lor	-2.32713	0.000322853
Ms4a4b	1.31052	0.0022999		Ptprc	1.2132	0.000323471
Tmeff1	-1.28047	0.0023119		Slc4a5	-1.21471	0.000324366
Tmem100	-1.68499	0.00232832		Ccdc37	-1.04526	0.000325253
Tnip3	2.51109	0.00234726		1700023L04Rik	-1.06686	0.00032986
C030034L19Rik	-1.1854	0.00234931		Ppa1	1.03293	0.000331911
Ppp2r2c	-1.17933	0.0023599		E2f8	1.4519	0.00033239
Asz1	-1.03413	0.0023784		Sorbs3	-1.29231	0.000334461
Trim6	1.52608	0.00241453		Pik3cd	1.00621	0.000334462
Clec1a	-1.35301	0.00241967		Klf15	-1.1645	0.000335242
Bmp6	-1.84905	0.00242073		Fmo3	-1.92886	0.000336179
Cyp1a1	-2.51277	0.00242552		Hormad1	-2.93174	0.000338455
Olfr855	1.45257	0.00242601		Kifc2	-1.0892	0.000338455
Olfr987	1.5339	0.00242601		Trim6	1.10404	0.000338455
Wscd1	-1.42185	0.00245128		4930451C15Rik	-1.18109	0.000338455
Car5a	1.30862	0.00250274		Cks1b	1.01866	0.000338695
Acer2	-1.72663	0.00251305		Atcay	1.43217	0.000340419
Nxph1	-1.21755	0.00255792		Ptger4	1.28032	0.00034043
Acvr1c	-2.15892	0.00255792		Bcl3	1.00238	0.00034043
Olfr1115	1.5064	0.00255983		Mcoln2	1.70841	0.000340922
Tmem146	-2.7113	0.00256721		Gngt2	1.04038	0.000346032
Unc93a	1.07283	0.0025802		4930470P17Rik	1.50814	0.000347186
Dsc1	-2.16506	0.00260521		Atp6v1b1	-1.56399	0.00035119
Klhl4	-1.26387	0.0026063		Cenpi	1.29816	0.000352107
4930522O17Rik	1.07607	0.00261426		Bcl11a	1.22722	0.000354965
Tmem204	-1.22994	0.00262351		Olfr1362	-1.94057	0.00035737
Npr3	-1.46193	0.00264022		Olfr483	1.27744	0.00035764
Hk2	1.0501	0.00264022		Notch4	-1.3027	0.000359157
Zdhhc18	-1.03585	0.00268056		Kif15	1.04564	0.000360442
Ptger4	1.05401	0.00268639		6720470G18Rik	1.55001	0.000363273
Aqp3	1.07271	0.00269933		D630029K05Rik	-1.00477	0.000363384
Naalad2	-1.11758	0.00270788		Dnahc10	-1.27206	0.000363384
Ppp1r14d	1.2157	0.00272254		Cd80	1.19727	0.000363816
D630042F21Rik	1.83325	0.00274185		Cst7	1.84488	0.000372465
Cyp3a41a	1.00383	0.00274423		Cxcl13	1.57438	0.000372465
Rsu1	-1.00076	0.00276017		Klra7	2.0213	0.000372568
Sult1d1	-1.20347	0.00276112		5730409L17Rik	-1.0875	0.000372568
Slc22a6	1.08832	0.00276718		Apol7a	1.88603	0.000376411
Mest	-1.14401	0.00278766		Angpt4	-1.13718	0.000376764
Ampd3	-1.04546	0.00279936		Itga10	-1.03653	0.000377579
Vmn1r56	1.27851	0.00279942		Pla1a	1.78981	0.000377681
Sox18	-1.41422	0.00280074		H60a	1.05789	0.000377681
Trim55	2.16219	0.00281344		Fcrl5	1.45792	0.000378578
1700029G01Rik	-1.032	0.00281344		Fgl2	1.22816	0.000384448
Arc	1.28454	0.00281344		Pole	1.18614	0.000388318
Rasd2	-1.0423	0.00283179		Kcne2	-1.08539	0.000390396
Trim15	1.47771	0.00284621		Rad54b	1.05944	0.000393873
Pllp	-1.61621	0.00285059		Bid	1.03114	0.000396626
Tpsab1	-2.4656	0.00288464		Hist1h2ak	1.25234	0.000397537
6330512M04Rik	-1.16142	0.00290513		Npr1	-1.22177	0.000404936
Gtsf1l	1.08322	0.00295587		Olfr231	1.05299	0.000405674
Cma1	-1.03896	0.00295631		9330151L19Rik	-1.00689	0.00040902
Lhfpl3	-1.01952	0.00295631		Pde1a	1.55616	0.000409206
Adam12	-1.34733	0.00303008		Oip5	1.46931	0.000409513
Nfkbie	1.16453	0.00303442		Nsg2	1.65184	0.000409513
Pcbp3	-1.02004	0.00303891		Sprr3	-1.69769	0.000410045
Olfr617	1.0767	0.00304534		Prf1	1.08437	0.000411359
Gpr37	-1.86311	0.0030476		Tbata	-1.15449	0.000414687
Fcna	-1.14624	0.0030483		Ces2b	-1.45576	0.000421315
Lcat	-1.01402	0.00305647		Kcnip4	-1.04216	0.00042788
Rprml	-1.26603	0.00305647		Chia	-1.19507	0.000429883
Olfr649	1.0451	0.00307088		Kif2c	1.31714	0.000430016
AI836003	-1.46785	0.00307652		2410066E13Rik	-1.22536	0.000430544
Six3	1.01041	0.00308411		Lrr1	2.02426	0.00044387
C130021I20Rik	-1.78244	0.00310505		2310003H01Rik	-1.16362	0.000445044
Olfr685	1.4473	0.00310505		Txk	1.21046	0.000448742
Olfr676	1.23284	0.00312785		Gstm1	-1.14536	0.000448787
Hilpda	-1.12254	0.0031435		Gtse1	1.50366	0.000449215
A730054J21Rik	-1.26751	0.00317819		Tbx21	1.50419	0.000449805
Fgf21	1.16116	0.003181		Cux2	-1.00602	0.000450486
1700019H22Rik	-1.45544	0.00319826		Prrxl1	1.82338	0.000451358
4930557A04Rik	1.11561	0.00329888		Cyp1a1	-2.06476	0.000451895
Kcnj14	-1.34324	0.0033014		Ung	1.06263	0.000454329
Olfr1341	1.14617	0.00331658		Slc16a11	-1.10937	0.000454329
Ccdc3	-1.48873	0.00334887		LOC676708	1.35056	0.00045644
Aplnr	-1.07512	0.00334887		Vav1	1.54958	0.000457553
Ddx25	2.01512	0.00334887		Nfkbie	1.67156	0.000457767
Apln	-1.11788	0.003355		Sult1c2	-1.61497	0.000462909
Flt4	-1.42949	0.00335765		Chga	1.10037	0.000463546
E330037M01Rik	1.68188	0.0033992		Ermap	1.54926	0.000464283
Hhat	1.56872	0.00344039		C030034L19Rik	-1.32002	0.000464666
Slc6a19	-1.79741	0.0034464		Glis1	-1.30102	0.000466961
Hoxd12	1.02311	0.00348386		Daam2	-1.08942	0.000467445
9630028I04Rik	-2.55689	0.00350967		Unc5a	-1.09136	0.000468273
P2rx6	-1.18725	0.00350968		Oas1c	1.1103	0.000469527
Gm19648	-1.08296	0.00357522		4932442A14Rik	-1.2347	0.000471073
Col5a3	-1.03299	0.0035805		D7Ertd443e	-1.13043	0.000471073
Vmn1r236	1.47026	0.00362585		Aknad1	-1.25333	0.000471295
Kit	-1.15966	0.00368969		Ttk	1.65127	0.000471669
Eln	-1.1807	0.003693		Klrc1	1.35741	0.000472447
A730035I17Rik	-1.1866	0.00370946		Aox3	-1.43672	0.000477324
Chga	1.0799	0.00371983		Bub1b	1.01679	0.000482125
Olfr976	1.08663	0.00375734		4833419E13Rik	-1.3662	0.000484465
Ifna12	1.39445	0.00375734		Hist1h2ao	1.10651	0.000486123
Vav1	1.06689	0.00379069		Cd209f	-1.14712	0.000489836
Mcm10	1.66169	0.00380101		Tnfrsf25	-1.23051	0.000491399
Olfr876	1.09772	0.00380292		Serpina3g	1.44451	0.000501632
Ripply3	-1.10442	0.00381357		Ptpn6	1.22847	0.000501825
Tie1	-1.04844	0.00384797		2300002M23Rik	-2.5321	0.000509575
Orm1	1.26888	0.00385144		Nrarp	-1.09232	0.000513203
Gsdmc2	-2.28979	0.00385608		Mcf2l	-1.20948	0.00051712
Tmod2	-1.06094	0.00386497		Nxph1	-1.43919	0.000521188
Cldn2	1.36897	0.00386673		Top2a	1.46608	0.00052405
4933432G23Rik	1.42309	0.00388188		Bcl2a1c	1.18635	0.000525065
Emcn	-1.05098	0.0039341		Cst8	-1.01081	0.000525065
Olfr481	1.55319	0.00394486		Srcin1	-1.11869	0.000525065
Hs3st3a1	-1.50609	0.00399228		Reep6	-1.1762	0.000525065
Podxl	-1.30141	0.00399383		Cadm2	-1.24672	0.00052612
Wnt7a	-1.11771	0.00402274		Ltb	1.15612	0.00052612
Ctrc	1.25856	0.00403788		Cldn2	1.53077	0.000527555
Cdt1	1.10238	0.00409475		Gch1	1.19871	0.000528506
Prdm8	-1.12778	0.00411323		Sycp2	1.80914	0.00053436
0610008F07Rik	1.14243	0.00414791		Tlr1	1.67866	0.00053436
St6galnac3	-1.30162	0.00423211		Kifc5b	1.23763	0.000534568
Tgfa	1.11638	0.00424206		Fhit	-1.04219	0.000539099
Tspan7	-1.09602	0.00424206		Upb1	1.07935	0.000541935
Smad6	-1.35543	0.00424845		E030010A14Rik	-1.51823	0.000550773
Sh2d3c	-1.02873	0.00430975		Glrp1	2.01403	0.000555652
Olfr1123	1.63618	0.00432993		9230104L09Rik	-1.14353	0.000558967
Rhcg	1.98572	0.00435368		Gm5483	2.12233	0.000565776
Spic	1.01909	0.00436287		Kifc1	1.22502	0.000566117
C430039J01Rik	-1.28441	0.00438124		1700105P06Rik	1.01515	0.000570131
Olfr598	1.40779	0.00440755		Cecr6	-1.61117	0.000576958
Gm101	-1.02988	0.00441606		Smc1b	1.83862	0.000579629
Sell	1.00681	0.00452194		Esm1	-1.41543	0.000581672
Ccne1	1.24084	0.00465468		Tcn2	-1.06347	0.000593443
Cdk5rap2	1.16129	0.00471142		Muc15	-1.78329	0.000594815
Cxcl2	2.64375	0.004716		Xdh	1.54523	0.000595416
Sox7	-1.10665	0.00471773		Trex1	1.431	0.00059614
Spns2	-1.03646	0.00472795		Snx10	1.17376	0.000599599
Avpr1a	-1.37874	0.0047314		Cxcr3	1.41601	0.000600468
Col4a2	-1.10626	0.00475337		Fam25c	-2.06027	0.000606649
Smc1b	1.23652	0.00475337		Kcnh5	1.05674	0.000609362
1700049E17Rik1	1.06097	0.00475337		Ect2	1.1312	0.000611357
Olfr937	1.17042	0.00476357		Parp10	1.0013	0.000613085
Hcn1	1.50704	0.00477685		Gpr171	1.64804	0.000623662
Fam154a	2.42355	0.00478688		Clec5a	1.8414	0.000625588
Alox12e	1.5069	0.00481268		Tnfrsf18	1.09774	0.000629452
Vmn1r18	1.15867	0.00484129		Cpa1	-1.26292	0.000631986
2300002M23Rik	-2.11143	0.00487456		Gpr85	1.18578	0.000639468
Mcm6	1.0386	0.00488586		Ccdc108	-1.02205	0.000639525
Olfr741	1.33331	0.00491542		Clca1	1.00446	0.000674734
Gpr4	-1.0022	0.00495819		Klrc3	1.41443	0.000675627
Tmem88	-1.21258	0.00495819		Srrm3	-2.02238	0.00068243
Eng	-1.01717	0.00495819		Gm101	-1.14764	0.000685023
Mcpt4	-1.03095	0.00502338		Il18rap	1.18545	0.000685442
Plvap	-1.4201	0.00503882		Blm	1.0137	0.000685442
Ccdc25	1.1029	0.00513381		Ipcef1	1.18091	0.000685992
Prdm11	-1.00855	0.00515403		Bcan	-1.45955	0.000689097
4930579F01Rik	-1.04722	0.00517646		Ptpro	1.16451	0.000689097
Lmnb1	1.0625	0.00521556		Mrgpra2b	1.84945	0.000691153
Cxx1b	-1.09954	0.0052708		Bmpr1b	-1.02322	0.000695889
Fyb	1.47199	0.00528448		Gtsf1	1.13625	0.000697401
Il1f6	-1.74484	0.00539584		Rem1	-1.13831	0.000700522
Ypel2	-1.02961	0.00543665		Fam154a	3.34317	0.000700522
Olfr655	1.51938	0.00547543		1810010H24Rik	-1.22437	0.000700522
Dsg1a	-1.8818	0.00553925		5830405N20Rik	1.07782	0.000700522
Cenpw	1.15004	0.00561616		Cxcl2	3.51662	0.000700522
Oog1	1.03468	0.00561616		Clca2	1.13193	0.000702331
Saa4	1.11537	0.00563258		AU021092	-1.09937	0.000719983
Kcnh1	-1.41392	0.00583089		Ccdc18	1.14847	0.000730124
Zfp128	-1.04981	0.00589355		Depdc1a	1.54991	0.000735336
E130309F12Rik	1.23665	0.0059206		Trpm2	1.07085	0.00073629
Cyp2a22	-1.50068	0.00596872		Cnfn	-1.72266	0.000739296
Rbp7	-1.06702	0.00599729		Mthfd1l	1.01725	0.000740389
Syt1	1.15922	0.00604911		1700102P08Rik	-1.38367	0.000742606
Hpgd	-1.25033	0.00608433		Ptcra	1.45445	0.000761038
Morc1	1.59252	0.00609163		Olfr1271	1.26004	0.000762524
Olfr979	1.07381	0.00622537		Chrm3	-1.01708	0.000765795
Olfr137	1.1344	0.00626228		Ccdc129	-1.63711	0.000777063
Wbscr17	-1.1202	0.00628254		Slc28a2	1.78339	0.000778949
Heg1	-1.01113	0.00628341		2900006A17Rik	-1.05037	0.000781834
Rpl39l	-1.43566	0.00630139		Stfa2l1	1.73242	0.000782667
Krt33b	1.02933	0.00637011		Pkib	1.31013	0.000787933
Eltd1	-1.01134	0.00639767		1810009N02Rik	-1.6427	0.000804774
Il21r	1.14442	0.00648348		Cd8b1	1.38951	0.000806968
Dusp2	1.33745	0.00649992		Gtsf1l	1.10071	0.000806968
Cd1d2	-1.31654	0.0065079		Olfr56	1.01953	0.00082295
Gm3161	1.55952	0.00652812		Mmp25	1.83285	0.000831926
Pof1b	-1.77251	0.00656465		Mxd3	1.0127	0.000838534
BC030476	1.40606	0.00665246		Pycard	1.10244	0.000848489
Sparc	-1.05147	0.00667456		Prdm11	-1.09854	0.000851997
Tusc5	-1.10384	0.00669337		Troap	1.08996	0.000853468
Tek	-1.45075	0.00669412		Copg2as2	-1.14273	0.000872693
Olfr1280	1.27897	0.00669965		Prss54	1.07845	0.000876401
Wasf1	1.46547	0.00674485		Tle2	-1.12285	0.000880907
Higd1b	-1.03875	0.00679764		Tgm3	-1.2174	0.000888736
Nsg2	1.6091	0.00679764		Arhgef37	1.0975	0.000893274
Fam83d	-1.11052	0.00690761		Foxp4	-1.02077	0.000900029
Defb7	-1.50443	0.0069278		Avil	-1.01017	0.000909583
Exo1	1.34007	0.00697256		Cd53	1.20535	0.000909919
Grm2	1.32078	0.00697256		Lce3c	-3.27009	0.000921039
Sbsn	-1.03045	0.00702296		Pacsin1	1.29315	0.0009354
Spesp1	1.15788	0.00702792		Naip2	1.1919	0.000938369
Hspa1b	-1.96938	0.00710104		Hspa1b	-2.35997	0.000950163
Samd9l	1.38977	0.00718466		Pdcd1lg2	1.4035	0.000953709
BC023105	2.17628	0.00718844		Orm1	1.72318	0.000956115
Cdc6	1.12899	0.00730726		4631423B10Rik	-1.21635	0.000956829
4930503B20Rik	1.38103	0.00740015		Cyp4f15	-1.00849	0.000960761
Kl	-1.53303	0.00768185		Polq	1.01232	0.000969446
Edil3	-1.55227	0.00777167		Fez1	-1.25611	0.000971678
Pinx1	-1.18689	0.00793297		Cd68	1.06086	0.000980353
Krt25	-1.0475	0.00795711		Gda	1.02555	0.000980421
Gm11559	1.38143	0.00795734		A430093F15Rik	1.24711	0.00098339
C730027H18Rik	2.34603	0.0080266		Htr7	1.75867	0.000990486
Nlrp9a	1.23845	0.00803985		Ercc6l	1.51259	0.000993934
Hand2	1.04169	0.00806007		Nkg7	1.37328	0.000993934
Gck	-1.08153	0.00806918		Foxo6	-1.23925	0.000994114
Il20ra	-1.00005	0.00813345		Aurkb	1.35674	0.00100225
S100a7a	-1.33892	0.00817403		Zc3h12d	1.50921	0.00100389
Slc6a2	-1.35724	0.00818927		Bcat1	2.7408	0.00100404
Gm8267	1.07454	0.00836383		Crisp1	-1.62789	0.00101087
Esrrb	1.02831	0.00842682		Hspa1a	-2.37208	0.00101571
Rbp2	-1.58364	0.00853071		Ms4a14	2.49476	0.00102808
Drd3	1.41229	0.00867653		L3mbtl2	-2.58809	0.00103188
Asprv1	-2.12551	0.00884024		Gif	-2.15688	0.00103945
Tub	-1.03061	0.00890844		Mafb	1.05201	0.00104336
Mlana	1.71962	0.00890844		Ctsw	1.19476	0.00104596
Nepn	1.29283	0.00896886		Cd1d2	-1.18319	0.00104596
Rnf182	1.07621	0.00904849		Wfdc12	-1.51213	0.00104692
Lcp2	1.12149	0.00916806		4930548H24Rik	1.13175	0.00105153
Aldh8a1	1.04085	0.00920882		Olfr1391	1.0211	0.00106191
Ccdc88b	1.1078	0.00929955		Cd209c	-1.64396	0.00106832
Tll1	-1.47015	0.00942267		Olfr1183	1.08971	0.00106982
Gm16551	1.28982	0.00966075		Vsnl1	-1.0718	0.00106982
Olfr1428	1.21231	0.00987929		Rasa4	1.03017	0.00107996
Nostrin	-1.76984	0.00989137		Rtdr1	-1.08419	0.00108322
Reep1	-1.03476	0.00994815		Lce3f	-2.36143	0.00108322
Clec5a	1.01684	0.0102687		Krt85	1.1089	0.00108646
Olfr1487	1.21739	0.0103291		AI426330	-1.22582	0.0010926
Olfr971	1.01654	0.0103463		Krt78	-1.99873	0.0010956
Bcat1	1.67783	0.0103597		Cybb	1.17715	0.0010956
4930485E13Rik	-1.1248	0.0103825		Tnfrsf4	1.10788	0.00109613
Tshr	-1.35488	0.0104101		Wdr69	-1.05718	0.00109872
Fgf5	-1.03582	0.0105391		Plek	1.00183	0.00110625
Cyp26b1	-1.8172	0.0105823		Cd40	1.04388	0.00110664
2310033E01Rik	-1.33413	0.0106838		Cpa3	-1.84683	0.00111215
Usp29	1.60555	0.0108		Pim1	1.12744	0.00111633
Sh2d6	1.43237	0.0108256		Sh3bp2	1.29374	0.00112755
Kcnd2	1.43797	0.0108388		Sele	1.91558	0.00112855
1700026D11Rik	1.04749	0.0109158		Styk1	1.08222	0.0011339
Pknox2	-1.02994	0.0109402		Gm9960	-1.8743	0.00113729
Serpinb12	-1.85535	0.0109494		9330159F19Rik	-1.18704	0.00114369
Olfr1381	-1.01805	0.0109819		Gm16532	1.18047	0.00116581
2310050C09Rik	-1.32903	0.01107		Cpn2	1.55115	0.00116581
Slc5a2	-1.00926	0.0111686		Defa20	1.10243	0.0011778
Rph3a	1.18387	0.0112362		Tnfsf8	1.62117	0.00118582
Ccr4	1.25013	0.0113464		T2	-1.40567	0.00118749
Gm3877	1.64051	0.0115004		2810429I04Rik	-1.01471	0.0012038
Hspa1a	-1.67515	0.0116909		Asprv1	-2.03065	0.00121173
Gm9887	-2.00725	0.0118536		Fen1	1.03619	0.0012141
1700016B15Rik	1.23195	0.0123593		Csf3r	1.02379	0.00122116
Nat3	-2.53571	0.0126135		Shank3	-1.13849	0.00123637
Gm6260	-1.48052	0.0126742		Cyp2a5	-1.6804	0.00124764
Kcnq3	-1.63453	0.0127654		S100a9	1.58847	0.00124822
4932435O22Rik	1.17801	0.0127884		Cd8a	1.49551	0.0012634
Armcx4	-1.21348	0.0128184		Stap1	1.30521	0.00126901
Rab3c	-1.32584	0.0128354		Ifna12	1.6026	0.00129244
4930422G04Rik	1.21188	0.0129287		4933400A11Rik	-1.22064	0.00129916
Cthrc1	-1.05064	0.0130539		Expi	1.1759	0.00129958
L3mbtl2	-1.51639	0.0130913		Gdpd2	-1.33176	0.00131858
Olfr790	1.55624	0.0132879		H2-T22	1.37399	0.00132112
Btbd16	1.19821	0.0133569		Drd4	1.15923	0.00132272
Ighv14-2	1.06359	0.0135473		Mup5	1.456	0.00133054
4731417B20Rik	1.07788	0.0142551		Lypd6	-1.10834	0.00135882
Jub	-1.13105	0.0143024		Gsta1	-1.17341	0.00136416
Uhrf1	1.82353	0.0146666		Cyp2a4	-1.71355	0.00136416
Gm4827	1.08947	0.0148569		Iyd	-1.20914	0.00136416
Cd5l	1.33139	0.0150844		Ahdc1	-1.33909	0.00137012
Amotl1	-1.02239	0.0154245		Syt12	1.11899	0.00137022
Tspan18	-1.06726	0.015426		Il10	1.35188	0.00137654
Ankrd1	1.51991	0.0155301		St6galnac5	-1.25914	0.00139314
Gal3st4	-1.0663	0.0155912		Sbsn	-1.19275	0.00139314
Tmem45b	-1.87061	0.0156954		Bard1	1.70202	0.00139314
Serpinb3b	-2.15581	0.0158114		Vmn1r231	1.40166	0.00141683
4930517O19Rik	-1.07392	0.0158125		Gfi1	1.10748	0.00143759
Itgb8	1.01404	0.015943		Kprp	-2.4785	0.00145328
Olfr77	1.00913	0.0162469		Sfpi1	1.28399	0.00145494
Olfr167	1.5093	0.0163759		4931419H13Rik	1.65895	0.00145995
Tprg	-1.31213	0.0163827		Gpr113	-1.13658	0.00146043
Gcm1	1.08449	0.0165649		Aoah	1.11717	0.00151428
Sdr9c7	-1.50472	0.016572		Mup4	1.41105	0.00153604
Olfr727	1.61013	0.0165819		Lrrc26	-1.00596	0.0015566
Tmigd1	-1.22654	0.0167547		Ada	-1.53298	0.00156305
Dtl	1.48751	0.0173898		Hist1h2al	-1.20717	0.00156346
Pcdhb11	-1.05831	0.0176545		Egr1	1.69484	0.00157015
2310005G13Rik	-1.73562	0.0176676		Sox18	-1.03433	0.00158338
Olfr726	1.01941	0.0177083		Ivl	1.47137	0.00161099
Fut9	-2.26433	0.017863		Nav2	-1.2303	0.00161129
Cnfn	-1.21566	0.0181015		Gm4827	1.59416	0.0016434
4930412O13Rik	1.12802	0.018143		Fxyd2	-1.0398	0.0016434
Acvrl1	-1.0598	0.0181818		Gm11428	1.22277	0.00164727
Ccdc36	1.10695	0.0184037		Lmnb1	1.16391	0.00164974
5830416P10Rik	1.17283	0.0186525		Aloxe3	-1.12067	0.00167398
1500009C09Rik	1.06798	0.0186612		1700049L16Rik	1.07537	0.0016775
Olfr643	1.34204	0.0188722		Muc5b	-1.60943	0.00168412
D330005C11Rik	-1.10002	0.0193756		Cd3d	1.19006	0.00170054
Abca16	2.46422	0.0196929		Slc26a9	-1.05385	0.00171915
Dck	1.43176	0.019784		Lce1b	-1.99091	0.00173456
Traip	1.12222	0.0198852		Kif18b	1.02163	0.00173517
2310002J15Rik	-1.40378	0.0201406		Ankrd33b	-1.05304	0.00173598
Pdpk1	1.35262	0.0202022		Pdcd1	1.98481	0.00178479
Fgf12	1.3268	0.0204112		Heg1	-1.06585	0.00182189
A430089I19Rik	1.64658	0.0208681		Ypel2	-1.27164	0.00182747
Flrt1	-1.61311	0.0210023		Crp	1.02961	0.0018348
Lce1f	-2.45026	0.0210681		Klra10	1.06198	0.00184029
Mical3	-1.09834	0.0213032		Stag3	1.12851	0.00185066
Serpinb3c	-1.21853	0.0220633		Pdia2	-1.04233	0.00185066
Rnf222	-1.51648	0.0224076		B930095I24Rik	-1.23155	0.00190044
Ptprv	-1.32089	0.0227851		Cd209a	-1.35328	0.00193653
Sycp2	1.01552	0.0228323		1700049E17Rik1	1.3513	0.00194776
BC100530	-1.89086	0.0231133		Lhfpl3	-1.20206	0.00196196
Lce3c	-3.21959	0.0232576		Kntc1	1.03191	0.00196196
2310002L13Rik	-1.57971	0.0237591		Lck	1.20509	0.00196202
4933409F18Rik	1.04228	0.0238753		Klrd1	1.0255	0.00202427
Elovl4	-1.62657	0.0240857		Abcb11	1.1119	0.00202782
Prss27	-1.52476	0.0242817		E030026E10Rik	-1.07473	0.00203739
Sdr16c6	-1.41936	0.024453		D930021H04Rik	-1.01262	0.00204192
Ttpa	-1.00284	0.0245738		2310002J15Rik	-1.53186	0.0020474
Sprr1b	-1.94336	0.0246004		Gm10319	1.08616	0.00206335
Cd209b	-1.04449	0.0246156		Gm19648	-1.23509	0.00209244
Gldc	1.02271	0.0247721		Col2a1	1.10257	0.00212257
Nr1i3	1.20628	0.0248404		Bglap-rs1	-1.03865	0.00212914
Scrt1	1.22463	0.0251601		Cyp26b1	-1.38274	0.00214075
Mup5	1.25168	0.0251828		Crct1	-2.29622	0.00214075
Pax3	2.00864	0.0253742		Il4i1	1.24471	0.00215017
Aldh3a1	-1.21675	0.0255383		C130021I20Rik	-1.95731	0.00215448
Olfr1508	1.0557	0.0257928		Mup1	2.01087	0.00215829
Hoxa13	1.60896	0.0262687		2610318N02Rik	1.1557	0.00216809
Olfr1491	1.0188	0.0263317		Pkd2l1	-1.24544	0.00218958
Ccl19	1.24319	0.0264813		Trim65	-1.09309	0.00221898
Rna28s1	1.02505	0.0265745		Pla2g5	2.892	0.00226791
Gm5665	-1.00952	0.0267396		Clca4	1.39979	0.00228176
4930539N22Rik	1.32099	0.0272029		9630028I04Rik	-2.36907	0.00230715
BC048502	1.97239	0.0279317		1500035N22Rik	-1.16733	0.00240045
Crisp3	-2.81114	0.0281901		Stra6	-2.11925	0.00242221
Adamtsl4	-1.04418	0.0283088		Flrt1	-1.08626	0.00243602
Slc9a3	1.2497	0.0286578		Slc27a6	1.07019	0.00246994
Abcg8	1.51272	0.0287755		Mpp3	-1.31551	0.00247795
2310042E22Rik	-2.25394	0.0289187		2900002J02Rik	-1.05296	0.00250359
Slc35d1	1.00085	0.0297612		Rgs22	-1.1388	0.0025186
Mybpc3	1.52608	0.0299555		Smad6	-1.0086	0.00258848
Lce1e	-2.05643	0.0302672		Syt8	1.2677	0.00261541
Angptl1	-1.04231	0.0308315		Pinx1	-2.14188	0.00262532
Serpinb11	-1.03815	0.0309212		Alox12e	1.34663	0.00263018
Olfr1367	-1.79416	0.0309309		Lce1a2	-2.23384	0.00267574
Ms4a14	1.18333	0.0312622		Sh2d1a	1.5158	0.00269723
Vmn1r188	1.24596	0.0313521		Lce1c	-2.35084	0.00276322
Plag1	1.75956	0.0316924		Krtdap	-2.31373	0.00282521
Stap1	1.03768	0.0319164		Olfr229	1.15242	0.00289221
Prss46	1.36015	0.0324573		1700049E15Rik	1.41175	0.0029412
Olfr951	1.3133	0.0325262		E430013K19Rik	-1.32663	0.00298908
Gprc5d	1.02104	0.0327296		9830107B12Rik	1.14883	0.00300385
2900064F13Rik	-1.15796	0.0327438		Foxp3	1.59586	0.00300988
Olfr447	1.87606	0.0328326		Tpsb2	-1.02315	0.00302874
Ryr2	1.00302	0.0329483		Cd5l	1.64919	0.0030318
Tktl1	-1.26596	0.0332537		Olfr855	1.37326	0.00303437
Zfp786	-1.21882	0.0332553		Unc93a	1.31187	0.0030532
D630014O11Rik	1.05011	0.0335433		H2-Oa	1.15497	0.00305546
Lce1b	-1.80768	0.0341007		Pitpnm3	-1.19161	0.00306526
Acer1	-1.62449	0.0341007		Calm4	-2.36953	0.0030716
Cdc42bpb	-1.05397	0.035227		Cd244	1.06166	0.00307753
Bard1	1.28682	0.0354748		Insl6	1.06407	0.00309013
Cd209g	-1.15559	0.0357656		Abhd16b	1.21237	0.00310202
Olfr275	1.02676	0.0364309		Klra20	2.04065	0.00312589
B130034C11Rik	-2.12879	0.0367585		Cyp2d13	1.30233	0.00312667
Lingo2	1.09866	0.0368094		Krt4	-1.91268	0.00314406
Ptcra	1.71406	0.0368621		Tbx22	1.33196	0.00326427
B230343J05Rik	1.424	0.0376737		Nkpd1	-1.29333	0.00327192
Syce1	-1.78033	0.0377305		Gpr33	1.38948	0.00327192
Apol10b	1.20286	0.0377611		Angptl4	1.41234	0.00331013
Fgb	1.13681	0.0384855		Icos	1.29144	0.00333252
Slc15a1	-1.07155	0.0388817		Serpina3f	1.90912	0.0033372
Htr7	1.07084	0.039035		Il21r	1.16468	0.00334463
Olfr591	-1.07899	0.0391323		Hand2	1.39186	0.00342942
Slc25a48	-1.55902	0.0397479		Ptpru	-1.05371	0.00343586
Htr4	2.12742	0.0397999		Rnase1	-1.1829	0.00346722
Olfr1355	1.58789	0.0399241		Rptn	-1.77499	0.00354331
Csta	-1.46792	0.0408248		Rhcg	2.21373	0.00361184
Vps8	-1.07551	0.0409019		Itln1	1.05673	0.00363037
Ms4a3	1.0381	0.0410587		BC023105	2.89297	0.00363037
A930002H24Rik	-1.65823	0.0410722		Svs1	1.55441	0.00364938
Ambp	2.76764	0.0413852		Zfp579	-1.09066	0.00370964
Wfdc5	-2.31537	0.0414494		Fbxo39	1.48555	0.00377787
Lce1i	-1.83888	0.0414494		Acer2	-1.02318	0.00377787
Brip1	1.2986	0.0415622		Per1	-1.07785	0.00378121
B4galnt4	1.32435	0.0416256		Pnoc	-1.27987	0.00390074
Olfr470	1.21707	0.0417517		4930512B01Rik	-1.0486	0.00390074
Tbx20	1.5633	0.0419082		2610007B07Rik	-1.10742	0.00391894
Cdca5	1.2036	0.0422857		Gpr35	1.46855	0.00393606
Olfr228	1.80913	0.0424675		Ptpn20	-1.00124	0.00394893
Kcnc1	-1.03639	0.0428084		Ptpn5	-1.04054	0.00397603
B3galt5	1.62176	0.042834		2310005G13Rik	-1.52586	0.00409168
Rhoh	1.09596	0.0455426		Il1r2	1.33448	0.00412112
Lce1h	-2.41579	0.0460015		Abca16	2.65215	0.00421932
Krtdap	-2.71097	0.0463049		Sytl3	1.02107	0.00424568
Calm4	-2.11509	0.0466365		Coro1a	1.15913	0.00428938
Olfr772	1.70664	0.0466707		Btla	1.01021	0.00430617
Slc5a12	-1.23026	0.0467232		Olfr481	1.69278	0.00437262
Olfr1181	1.03898	0.0477		Gimap7	1.07574	0.00441069
Olfr888	1.14221	0.0478428		Gpr174	1.33376	0.00446875
4930519L02Rik	1.03277	0.0480469		Ighv14-2	1.22745	0.0045884
Mup4	1.13823	0.0488097		Ccl1	1.62378	0.00467417
				Fetub	-1.20779	0.00474028
				Lce1h	-1.9697	0.00478271
				C430039J01Rik	-1.24208	0.00479995
				Cma2	-1.62143	0.00481109
				Chrna7	2.44968	0.00486003
				Gm3161	1.11829	0.00486483
				Prom2	-1.03951	0.00497855
				S100a7a	-1.0532	0.00507769
				Lat	1.08328	0.00509906
				Capns2	-1.09042	0.0051825
				Mt4	-1.49704	0.00533728
				Ccdc25	1.07305	0.00541938
				4930519L02Rik	1.01484	0.00543229
				Kcnq3	-1.90963	0.00551836
				Slc6a19	-1.16663	0.00555999
				Kmo	1.26872	0.00560141
				9930021D14Rik	-1.36413	0.00570714
				Mogat1	-1.08806	0.00570798
				Lce1d	-2.10625	0.00572774
				Lce1a1	-2.16846	0.00579012
				Casp1	1.10235	0.00593886
				Rdh7	1.70798	0.00597445
				Gsdma	-1.394	0.00605959
				Dck	1.80561	0.00607005
				Vmn1r33	-1.32665	0.00609309
				Lce1i	-1.935	0.00624744
				LOC633417	1.1371	0.00627951
				Lce1f	-2.29947	0.00628484
				Calml3	-1.47335	0.00636821
				Cd28	1.1989	0.00636821
				Apol10b	1.81	0.00639179
				Erp27	1.76473	0.00644074
				Npr3	-1.09214	0.00649289
				Lrp8	1.09616	0.00655533
				5430402P08Rik	-2.02054	0.00656424
				Ccdc36	1.66579	0.00657313
				Angptl1	-1.164	0.00657313
				5031414D18Rik	1.358	0.00658808
				Mcpt4	-1.24914	0.00664195
				Acads	-1.13346	0.00666365
				Prph2	1.77245	0.00666973
				Ccdc99	1.29985	0.00669611
				Gm94	-1.30167	0.00676689
				Wfdc5	-1.67804	0.00735677
				Csf2rb2	1.15847	0.00736277
				Pcgf2	-1.15163	0.00737083
				Gm6460	1.09864	0.0075892
				Il22ra2	-1.07737	0.00766169
				Ces1b	-1.19625	0.00766742
				1700024P04Rik	1.55246	0.00786897
				2310033E01Rik	-1.24705	0.00787876
				Cldn22	-1.68708	0.00789643
				Olfr368	1.10728	0.00806232
				1110059M19Rik	-1.38763	0.00813472
				Ugt1a9	2.25881	0.00814251
				Krt13	-1.07576	0.00832344
				Dsg1a	-1.64894	0.0083597
				Tpsab1	-1.20867	0.00848925
				Them5	-1.40301	0.00863649
				Hcn1	1.27987	0.00878488
				1700024J04Rik	-1.60683	0.00879011
				6430704M03Rik	1.12172	0.00895349
				Defb39	1.11869	0.00911184
				Bglap	-1.53411	0.00916076
				Lce1e	-1.95423	0.0091924
				Gp2	-2.25639	0.00953967
				Nos1	-1.25672	0.00955227
				Sult1b1	2.05393	0.00961901
				Rbp7	-1.35249	0.00971682
				Gm10404	-1.03844	0.00983924
				Gm18756	-2.143	0.010454
				Lce1g	-1.65036	0.0104879
				Slc7a11	1.25226	0.0106487
				Btbd16	1.20471	0.0108181
				1700052I22Rik	-1.36122	0.0108229
				Defa-rs2	1.06063	0.0112928
				Dctd	1.61731	0.0112948
				Trim15	1.00577	0.0114902
				Olfr945	1.10686	0.0115325
				Atp10b	-1.09454	0.0120395
				Havcr2	1.3265	0.0128951
				Gm6377	2.39843	0.0129868
				Prtg	1.00414	0.0131142
				9330154K18Rik	-1.22652	0.0131669
				Ccl19	1.31824	0.0136318
				Serpinb9f	-1.01981	0.0138254
				5330426L24Rik	-1.19807	0.0142177
				Mlana	1.57276	0.0148144
				Myh4	-1.13046	0.0152175
				A130071D04Rik	1.28736	0.0153816
				Tpsg1	-1.04236	0.0157215
				Hrnr	-1.64127	0.0160248
				Ccr7	1.16191	0.0160769
				Il1f5	-1.04396	0.0161007
				Elovl4	-1.4538	0.0165691
				Camp	1.76575	0.0169818
				Olfr1039	1.03666	0.0171819
				D630014O11Rik	1.0672	0.0171895
				4930572P05Rik	1.37202	0.017191
				Ntng2	-1.00382	0.0176311
				S100a8	1.44194	0.0177729
				Rnf182	1.13183	0.0179747
				Fmo6	-1.12069	0.0181259
				C1rl	1.01572	0.0183208
				Slc46a2	-1.4311	0.0187168
				Hsd17b2	-1.01515	0.0187413
				Prm1	1.37082	0.0192049
				Ankrd1	1.47516	0.019637
				Serpinb2	1.02495	0.0197803
				Iqsec3	-1.22239	0.0199278
				Cdkn2d	1.05638	0.0199278
				Gpr55	1.02106	0.0202304
				E230025N22Rik	1.02526	0.0202877
				Olfr617	1.58483	0.0203231
				Syce1	-1.88591	0.0206122
				Olfr1344	1.05218	0.0211741
				Olfr790	1.0572	0.0214926
				Cyp2a22	-1.37212	0.0219462
				Fut9	-3.02887	0.0229175
				Olfr450	1.01284	0.0232954
				Gm9887	-1.7689	0.0233966
				Prss27	-1.07039	0.0236072
				Olfr1499	1.2603	0.0237445
				4932415M13Rik	1.49756	0.0239228
				Serpinb12	-1.39298	0.0242679
				Cypt9	1.38067	0.0243431
				1500009C09Rik	1.00505	0.0243611
				Grn	-1.03057	0.0243965
				H19	-1.03707	0.0246422
				Olfr655	1.03916	0.0249472
				1700065D16Rik	1.08999	0.0249698
				Olfr447	1.09229	0.0255375
				6330437I11Rik	-1.42464	0.0257196
				Olfr985	1.76661	0.0258617
				Olfr1280	1.04481	0.0265317
				Clec4f	2.29581	0.0269459
				D030036P13Rik	-1.17241	0.0273906
				Nepn	1.4296	0.0275708
				Olfr632	-1.42254	0.0296172
				2310042E22Rik	-1.94569	0.0296602
				Olfr568	1.19872	0.029937
				Adamtsl4	-1.11057	0.030089
				4932435O22Rik	-1.0429	0.0302593
				Rpl39l	-1.11696	0.0306151
				Rfx8	1.11109	0.0311456
				Drd3	1.11621	0.0313527
				Tshr	-1.1735	0.0331444
				Abca12	-1.29444	0.0338758
				6430514K02Rik	1.21406	0.033952
				Vmn1r181	1.44558	0.0341119
				Cabyr	1.81797	0.0345964
				Dsc1	-1.93539	0.03499
				Olfr77	1.05302	0.0357942
				Prok2	2.07341	0.0360395
				Olfr622	1.07359	0.0361339
				Ifna4	1.37474	0.0370547
				Ryr1	-1.19476	0.0372637
				Acer1	-1.24937	0.0381938
				Olfr421	1.64204	0.0389695
				Defb14	-1.45389	0.0390602
				Pgk2	-1.12149	0.0395284
				Gm15623	-1.40285	0.0396395
				Lrrc10	1.55721	0.040715
				Cnpy1	-1.00857	0.0409354
				Olfr1115	1.26551	0.0411749
				Krt20	1.77262	0.0412074
				Sprr1b	-1.6618	0.0415902
				Slc17a4	-1.4372	0.0425738
				Spink5	-1.32941	0.0425907
				Tnfsf18	1.67094	0.0426723
				Gpr81	-1.05782	0.0427684
				Gng4	-1.00136	0.0431135
				Aicda	1.01304	0.0433819
				Rbp2	-1.01744	0.0436536
				Xlr3c	-1.6623	0.0439772
				2310050C09Rik	-1.36807	0.0439772
				Sdr9c7	-1.35865	0.0445721
				Clcnkb	-1.09739	0.0446952
				Mcm2	1.01445	0.0461696
				Ptgds	1.63843	0.0490364
				Ankrd2	-1.31046	0.0491548
				Mybpc3	1.37851	0.0492231
				Stfa2	1.23486	0.0492667
				Cacng1	-1.13379	0.0495216
				Fbxw14	1.09523	0.0497698
				4921530D09Rik	-1.04906	0.0499225

## Sheet: GSE70445
ID	3d			ID	5d
	logFC	adj.P.Val			logFC	adj.P.Val
Aspn	-2.44571	5.09032e-06		Cxcl10	8.4988	1.32394e-08
Oasl1	4.83158	5.09032e-06		Lgals3bp	3.28635	1.95557e-07
Bcl9	2.42423	5.23982e-06		Ifit3	3.91956	1.95557e-07
AY036118	-3.43261	5.23982e-06		Irg1	7.86618	1.95557e-07
Tram2	2.08595	5.66737e-06		Cmpk2	3.74555	1.95557e-07
Elf2	-2.23498	5.66737e-06		Oasl1	5.95568	1.95557e-07
Slc29a3	1.66105	6.99497e-06		Fcgr1	4.42818	1.95557e-07
Cxcl10	7.35917	9.23674e-06		Isg15	4.89524	1.95557e-07
Laptm5	1.75732	1.09178e-05		Ifi27l2a	2.60785	1.95557e-07
Irf7	4.30782	1.09178e-05		Ccl2	5.36693	1.95557e-07
Dpt	-2.00443	1.09178e-05		Slc7a5	2.69398	2.39571e-07
Nrgn	1.73074	1.09178e-05		Rtp4	3.24192	2.76953e-07
Slc7a5	1.55537	1.09178e-05		Saa1	5.41339	2.83221e-07
Mvp	2.14993	1.09178e-05		Ly6f	4.15719	2.83221e-07
Slc30a4	-1.31703	1.09178e-05		Ccl7	5.86816	2.83221e-07
Foxf2	1.46793	1.09178e-05		Oas1a	4.22425	2.83221e-07
Kif21b	1.61412	1.09178e-05		Timp1	4.09686	2.83221e-07
Etv5	2.18863	1.09178e-05		Ms4a6d	3.34091	2.83221e-07
Scgb3a1	-2.31364	1.09178e-05		Irf7	6.33327	2.94536e-07
Odf4	1.8599	1.09178e-05		Usp18	3.61238	2.94536e-07
Irg1	5.69362	1.09178e-05		Cd177	3.77757	3.16566e-07
Bpifb1	-2.62966	1.11614e-05		Uhrf1	2.54025	3.39634e-07
Sgtb	-1.29151	1.11614e-05		Ly6e	2.80621	3.44445e-07
Nlrx1	1.85902	1.11614e-05		Ccl12	4.06051	3.7356e-07
Ifit3	3.02259	1.11614e-05		Ifit1	3.94861	3.88003e-07
5730564C23Rik	-1.55652	1.11614e-05		Znfx1	2.84538	4.09097e-07
Hap1	2.0077	1.11614e-05		Lcn2	3.01419	4.09097e-07
Usp18	2.73651	1.11833e-05		S100g	-2.0828	4.09097e-07
Ogn	-1.52582	1.11833e-05		Ch25h	4.63822	4.3773e-07
Rexo1	1.45827	1.11833e-05		D17H6S56E-5	1.80734	4.45784e-07
Mical2	1.50154	1.11833e-05		Ccl3	4.7399	4.45784e-07
C1qtnf3	-1.80046	1.11833e-05		Trim30d	3.15709	4.45784e-07
Col18a1	1.34547	1.11833e-05		Bst2	3.22522	4.45784e-07
Pdpk1	2.92413	1.11833e-05		Oasl2	3.80535	4.46937e-07
Zfp37	-2.12346	1.11833e-05		Mx2	4.0239	4.81029e-07
Mx2	3.46508	1.11833e-05		Cdt1	2.28726	4.81029e-07
Atp11b	-1.72733	1.11833e-05		Herc6	2.49898	5.20002e-07
Oasl2	3.03964	1.11833e-05		Saa2	4.34227	5.64377e-07
Dzip1l	1.28707	1.11833e-05		Mthfd2	2.4657	5.71261e-07
Isg15	3.23286	1.11833e-05		Trex1	2.81111	5.71261e-07
I830012O16Rik	2.45145	1.11833e-05		Slc29a3	2.30783	5.71261e-07
Abce1	-1.41336	1.11833e-05		Tcstv3	3.24102	6.2603e-07
Ost4	-1.29956	1.11833e-05		Gm20558	-1.84652	6.33608e-07
Trim55	3.32449	1.11833e-05		Emilin2	1.69013	7.59011e-07
4930503L19Rik	-1.16445	1.11833e-05		H2-K1	1.86302	7.59011e-07
Pacs1	1.2692	1.11833e-05		Ccne1	1.78163	7.72193e-07
Rrp12	1.88766	1.11833e-05		Slfn3	3.6163	8.14004e-07
Postn	-1.66912	1.11833e-05		Slfn8	3.61437	8.23253e-07
Fpgt	-1.55508	1.11833e-05		Saa3	6.32063	8.31843e-07
Muc1	1.48594	1.11833e-05		Tgfbi	2.11929	9.14e-07
Ntan1	-1.6019	1.11833e-05		Col18a1	1.71326	9.14e-07
A430071A18Rik	-1.81802	1.24934e-05		I830012O16Rik	3.51695	9.6953e-07
C4b	1.96314	1.24934e-05		Zbp1	5.39116	9.6953e-07
Wasl	1.19127	1.24934e-05		Prss22	2.88023	9.6953e-07
Fgl1	1.32882	1.33592e-05		Trim30a	2.79179	9.6953e-07
Rgma	1.84914	1.33592e-05		Il1rn	3.50249	9.70429e-07
Zfp708	-1.63378	1.33592e-05		Birc5	1.79514	9.70429e-07
Eif2s1	-1.3308	1.33668e-05		Xaf1	2.71868	9.70429e-07
Tnrc18	2.36746	1.33668e-05		Hist1h1b	2.58699	9.80779e-07
Il17ra	1.31877	1.33668e-05		Laptm5	2.10323	9.80779e-07
Prss22	2.36627	1.33668e-05		Ifit2	3.21391	9.80779e-07
Cox17	2.5089	1.33668e-05		Siglec1	3.25693	9.80779e-07
Slit3	1.20448	1.33668e-05		H2-Q8	3.02403	1.01751e-06
Cmpk2	2.9509	1.33668e-05		Sp110	2.12917	1.01751e-06
Glt28d2	-1.1708	1.33668e-05		B430306N03Rik	1.79482	1.01751e-06
Gfra2	1.857	1.33668e-05		Selp	2.20114	1.03698e-06
Olfr391-ps	2.188	1.3814e-05		Plac8	3.20649	1.06761e-06
Med13	-1.18849	1.38239e-05		AY036118	-3.06524	1.18081e-06
Atp6v0c	1.40263	1.39106e-05		H28	4.9481	1.18081e-06
2610301B20Rik	-1.07191	1.42599e-05		Runx3	2.61221	1.18081e-06
Ddx24	1.21301	1.42599e-05		Fcer1g	1.9476	1.18081e-06
Agap2	1.36245	1.42599e-05		Dpt	-2.18826	1.24079e-06
Vps41	-1.03938	1.42599e-05		Phf11	2.65006	1.24079e-06
Taf9b	-1.36388	1.42599e-05		Ifih1	2.37735	1.26056e-06
Hcfc1	1.54641	1.42599e-05		Ccr2	1.72587	1.26671e-06
Zbp1	4.07285	1.50476e-05		Slfn9	3.40038	1.3706e-06
Rab3il1	1.372	1.51614e-05		Serpina3n	3.77251	1.37241e-06
Per3	1.84764	1.56721e-05		1700024G13Rik	-2.35468	1.37241e-06
Isoc1	1.1286	1.57126e-05		Scgb3a1	-4.10615	1.37241e-06
Zfp54	-1.80866	1.59442e-05		Pttg1	1.67345	1.37241e-06
Vars	1.0418	1.60643e-05		Dhx58	3.71248	1.37241e-06
Ifit1	2.97136	1.60643e-05		Adamts2	1.43948	1.37241e-06
Polb	-1.21918	1.60643e-05		Eif2ak2	2.17675	1.37406e-06
Rps6ka3	-2.18791	1.60643e-05		Ms4a7	2.53802	1.38248e-06
Dnajc5b	-1.26968	1.61243e-05		Socs1	3.60418	1.45185e-06
Ube2v2	-1.32331	1.61243e-05		Stat2	2.63059	1.48014e-06
Grin2d	2.42301	1.61511e-05		Ifitm3	1.92121	1.50685e-06
Zfp940	-1.21406	1.61511e-05		Lbp	1.64003	1.50685e-06
C2cd4b	1.62851	1.62513e-05		Slc15a3	2.33333	1.52158e-06
Cnnm3	1.54598	1.62553e-05		Kif20a	1.71401	1.52158e-06
Il1rap	-1.68336	1.63344e-05		Daxx	2.42137	1.56816e-06
Mospd2	-1.48379	1.63344e-05		Adar	1.38139	1.58939e-06
Rsad2	4.16464	1.63344e-05		Emilin1	2.09192	1.62027e-06
Pnmal2	1.60008	1.63344e-05		Pml	1.99765	1.62027e-06
Capza1	-1.15474	1.66945e-05		Fmo3	-2.42035	1.62027e-06
Zfp217	1.59485	1.66945e-05		Tnfrsf1b	2.25857	1.62027e-06
Zfp583	-1.8505	1.66945e-05		Relb	1.74993	1.62027e-06
Oas1a	2.77308	1.66945e-05		Il18bp	3.49015	1.63708e-06
Cript	-1.2601	1.66945e-05		Hsh2d	2.73368	1.64647e-06
Tmem56	-1.19253	1.66945e-05		Lilrb4	2.59816	1.65013e-06
Stra13	-1.16721	1.66945e-05		BC006779	1.88699	1.65013e-06
Arih1	-1.12225	1.66945e-05		Ifi204	2.45181	1.65013e-06
Ccdc42	-1.83804	1.68005e-05		Psmb10	1.98441	1.65013e-06
Ttbk2	-1.09151	1.71194e-05		H2-Q7	2.28345	1.67794e-06
Gm5101	-1.28605	1.71194e-05		Oas1f	4.17292	1.67794e-06
4922501L14Rik	1.28735	1.71194e-05		Gm4955	5.28735	1.72513e-06
Gucy1b3	-1.17258	1.72203e-05		Nkpd1	-3.01159	1.72513e-06
Ube2l3	-1.01733	1.72885e-05		AI607873	3.64758	1.79614e-06
Ch25h	2.70155	1.74087e-05		Sdk1	1.97887	1.79614e-06
Gng11	-1.30172	1.74087e-05		Ifitm7	2.05195	1.79614e-06
Basp1	1.3432	1.75355e-05		Csf1	1.63326	1.79614e-06
Spata21	1.12346	1.75355e-05		Incenp	1.53315	1.79614e-06
Zfp169	1.65538	1.75355e-05		Rsad2	4.95253	1.86873e-06
Zfp629	1.39342	1.75355e-05		Marcksl1	1.54345	1.92161e-06
Zfp617	-1.19662	1.75355e-05		Mmp14	1.47638	1.92161e-06
Junb	1.31258	1.75355e-05		Igtp	3.2381	1.92161e-06
6330403K07Rik	-1.04964	1.75355e-05		Gbp5	4.28267	1.92161e-06
1700073E17Rik	-1.24266	1.75355e-05		C3	1.62583	1.92161e-06
Itpr3	1.29174	1.75355e-05		Mcm10	2.00708	1.92161e-06
Cdt1	1.36664	1.75355e-05		Tap2	2.80197	1.92161e-06
Ceacam2	1.79467	1.75355e-05		Col11a2	2.70963	1.92161e-06
Osbpl7	1.21365	1.75355e-05		Tor3a	2.29014	1.92527e-06
Adam5	-1.60884	1.75355e-05		Mthfd1l	1.64356	1.92776e-06
Zfp668	1.25037	1.75355e-05		Abtb2	1.47986	1.92776e-06
Pvrl4	1.28947	1.75355e-05		Cfb	3.25608	1.92776e-06
Rg9mtd1	-1.70194	1.7746e-05		2610002D18Rik	2.23669	1.9567e-06
Kifc5b	-1.60707	1.77507e-05		Psmb8	2.19506	2.04867e-06
Adamts2	1.2406	1.78867e-05		Slc22a12	-1.85747	2.04867e-06
Inppl1	-1.18365	1.78867e-05		Aldh1b1	2.3644	2.04867e-06
Slc22a13	1.10109	1.78867e-05		Bambi	-1.29295	2.07334e-06
Cops3	-1.27177	1.78867e-05		Aldh1a7	-1.40569	2.07561e-06
Phospho2	-1.52348	1.78867e-05		Tram2	1.61024	2.13881e-06
D17H6S56E-5	1.51757	1.78867e-05		Gch1	1.62356	2.16911e-06
C230091D08Rik	-1.46777	1.79439e-05		Kif18b	1.94635	2.16911e-06
Cd177	2.37178	1.81399e-05		Retnla	2.89674	2.24553e-06
Ccdc93	-1.06936	1.83278e-05		Rps6ka3	-2.36971	2.25645e-06
Matn4	1.12775	1.83278e-05		Atp6v0c	1.86876	2.28794e-06
Lbp	1.26134	1.84731e-05		Ms4a6c	3.46836	2.28794e-06
Ccl7	3.75664	1.84731e-05		Lrat	-1.51061	2.34438e-06
Cenpb	1.19254	1.84746e-05		H2-K2	2.0151	2.34438e-06
Fam123c	2.42142	1.85422e-05		Glt28d2	-1.32562	2.37624e-06
Aebp1	1.44792	1.85671e-05		Parp9	1.78495	2.37624e-06
Cops2	-1.10555	1.85671e-05		Slfn10-ps	3.35169	2.37624e-06
Api5	-1.28979	1.85671e-05		Sct	4.19954	2.37624e-06
Fam169a	-1.18465	1.85671e-05		Col1a1	1.89612	2.37624e-06
Gpr56	1.1535	1.85671e-05		Ncapg	1.6021	2.37624e-06
Dleu2	-1.16542	1.85671e-05		Cd276	1.18307	2.37624e-06
Sp110	1.82261	1.85671e-05		Ddx58	2.23173	2.37734e-06
Nudt6	-1.22135	1.85671e-05		Muc4	1.88898	2.39203e-06
BC005764	1.31292	1.85671e-05		Snord33	-2.8527	2.39434e-06
Rabgap1	-1.00054	1.85671e-05		Pola2	1.21444	2.39434e-06
Zfp189	-1.25172	1.85826e-05		Slfn1	3.71319	2.39434e-06
Lysmd3	-1.34536	1.85826e-05		Cpne2	1.47474	2.43154e-06
Nbas	1.51625	1.85826e-05		Bpifa1	-4.57536	2.45359e-06
Lgals3bp	1.70722	1.85826e-05		Cyba	1.94469	2.45764e-06
ORF61	1.08778	1.85961e-05		H2-Q2	2.08396	2.45764e-06
4933433P14Rik	-1.23659	1.8915e-05		Pyhin1	3.35393	2.45764e-06
Gm12770	-2.41723	1.8915e-05		Ccnb2	1.37424	2.48002e-06
Col1a1	1.21736	1.8915e-05		H2-T23	2.00675	2.52551e-06
Ddx25	3.12675	1.8915e-05		Irf9	1.42916	2.52661e-06
Tceal1	-1.14649	1.8915e-05		Cdca5	2.2748	2.52661e-06
Zfp959	-1.01474	1.8915e-05		Bcl3	2.53119	2.52661e-06
Krt17	1.60911	1.8915e-05		Apod	4.14057	2.52661e-06
Snx16	-1.27622	1.8915e-05		Mvp	2.2522	2.54958e-06
Cbll1	1.0255	1.8915e-05		Cdca8	1.75244	2.54958e-06
Nlrp2	-1.42386	1.8915e-05		Lilra6	1.34073	2.64927e-06
Kpna1	-1.08761	1.8915e-05		H2-Q4	1.90207	2.73245e-06
Dbp	1.85543	1.8915e-05		Tdrd7	1.28869	2.73245e-06
Fscn3	1.07643	1.8915e-05		Shisa5	1.61088	2.73245e-06
Nfix	2.3519	1.8915e-05		Unc93b1	1.93712	2.74509e-06
H28	3.28619	1.91814e-05		Gng11	-1.28968	2.74509e-06
Psmd6	-1.05522	1.91814e-05		Cenpe	1.32093	2.77476e-06
Shoc2	-1.31293	1.91814e-05		Klk1	3.01223	2.78164e-06
Sdcbp2	-1.01173	1.91976e-05		Hist1h1d	1.70263	2.78673e-06
Nr1d1	1.80535	1.94231e-05		Junb	1.5686	2.80069e-06
Zfp846	-1.29767	1.94231e-05		Fjx1	1.33372	2.80069e-06
Slc24a5	-1.61616	1.95218e-05		Trafd1	2.21741	2.80069e-06
4930430F08Rik	-1.12891	1.95218e-05		Nlrx1	1.59822	2.80069e-06
Fgf2	1.13277	1.98103e-05		D14Ertd668e	2.39622	2.80069e-06
Lalba	3.56612	1.98795e-05		Clec4a3	1.99851	2.80069e-06
Gm3258	-1.15675	2.01141e-05		Clec4e	3.05756	2.8058e-06
Abcb9	1.23395	2.02974e-05		Vars	1.37251	2.81189e-06
C1galt1	-1.14143	2.02974e-05		Dnmt1	1.30045	2.81255e-06
Kifc1	-1.10487	2.02974e-05		Basp1	2.20522	2.86514e-06
Fat1	1.06877	2.04504e-05		Isg20	1.97077	2.86658e-06
1110067D22Rik	-1.31197	2.04504e-05		Alg3	1.13131	2.86658e-06
Otud6b	-1.69219	2.04504e-05		Ncf4	2.02887	2.86658e-06
Ddx58	2.09704	2.04504e-05		Hrsp12	-1.56112	2.86919e-06
Bud31	-1.0541	2.04504e-05		Ccdc129	-2.29504	2.86919e-06
Arc	2.22975	2.04504e-05		Nsl1	1.27187	2.86945e-06
Braf	-1.20933	2.04504e-05		Epsti1	2.56227	2.91185e-06
Suv420h1	1.19883	2.04504e-05		Irgm2	2.84993	2.91748e-06
Ets1	1.13486	2.04504e-05		Hap1	1.77949	2.91748e-06
P2rx2	1.36192	2.04504e-05		Slc39a14	1.18133	2.91748e-06
Ctla2a	-1.15673	2.04504e-05		Cd300ld	1.66966	2.96612e-06
Zc3h13	1.52011	2.04504e-05		D630013G24Rik	-1.51014	2.99392e-06
Pfdn2	1.00975	2.04504e-05		Itgal	1.76141	2.99392e-06
Dcaf12l2	1.28965	2.06866e-05		Il2rb	2.00751	2.997e-06
Cpne2	1.21762	2.06866e-05		Tmem173	1.53774	2.997e-06
Akr7a5	1.29481	2.06866e-05		Pon1	-1.94839	3.03309e-06
Slc7a8	1.45699	2.06866e-05		Fzd3	-1.37709	3.03309e-06
C030039L03Rik	-1.1143	2.06866e-05		Fermt1	1.33142	3.0359e-06
Ltbp4	1.32188	2.06866e-05		Aox3	-1.81738	3.05728e-06
D930015E06Rik	1.35207	2.06866e-05		Ptafr	1.60936	3.05728e-06
Fblim1	1.87063	2.06866e-05		A530032D15Rik	2.67272	3.05728e-06
1700024G13Rik	-1.65921	2.06866e-05		Ogn	-1.67509	3.05728e-06
Pdxk	1.11213	2.06866e-05		Myc	1.80002	3.05728e-06
Trappc3	-1.15257	2.06866e-05		Rnf213	2.32353	3.05728e-06
Aldh7a1	1.51611	2.06866e-05		Exo1	1.87066	3.05728e-06
Shroom2	-1.13896	2.13012e-05		Parp14	2.00973	3.05728e-06
Rpp30	-1.289	2.13012e-05		Ccdc42	-1.83689	3.05728e-06
Rsad1	1.23747	2.13012e-05		Parp10	1.74939	3.05728e-06
Arsk	-1.02075	2.13012e-05		Cxcl9	5.18249	3.05728e-06
Plce1	-1.10142	2.13012e-05		Trem1	2.66159	3.05728e-06
Fundc1	-1.07601	2.14831e-05		Sectm1b	1.54227	3.06189e-06
Ikzf3	1.018	2.17472e-05		Racgap1	1.51625	3.07976e-06
Tomm40	1.21723	2.18674e-05		Syt12	1.53817	3.07976e-06
Shisa5	1.27987	2.18932e-05		Lst1	1.87945	3.07976e-06
Slfn9	2.45836	2.19324e-05		Rnf31	1.43135	3.07976e-06
Tmtc3	-1.3052	2.20118e-05		Zrsr1	-1.17571	3.08786e-06
Cul7	1.06582	2.20118e-05		Fcgr4	3.03757	3.08786e-06
Pml	1.39559	2.20118e-05		3300002A11Rik	-2.55051	3.09723e-06
St3gal3	-1.84402	2.20118e-05		Prex1	1.53059	3.09723e-06
B3gnt8	1.45923	2.20118e-05		Ccdc88b	1.92872	3.09723e-06
Jmy	1.36094	2.20118e-05		C3ar1	2.33341	3.11362e-06
Chchd8	-1.10329	2.20321e-05		Sytl2	-1.49512	3.15211e-06
Mea1	-1.00655	2.218e-05		Pgrmc1	-1.21708	3.15922e-06
Calu	-1.0994	2.218e-05		9130017N09Rik	2.26492	3.22531e-06
Plscr4	-1.38539	2.218e-05		Tlr2	1.70661	3.22531e-06
Nup35	-1.11108	2.218e-05		Pdia4	1.71046	3.22531e-06
Cnpy2	-1.10282	2.27765e-05		Zswim4	1.40679	3.22531e-06
Tax1bp1	-1.04851	2.27765e-05		Tmem106a	1.88628	3.22531e-06
C130026I21Rik	2.08128	2.30789e-05		Slfn4	5.2059	3.22531e-06
Zmiz2	1.00547	2.31361e-05		Fcgr2b	2.01991	3.22531e-06
9230104L09Rik	-1.83529	2.31361e-05		Cdc20	1.53513	3.22531e-06
Stat2	2.25565	2.33353e-05		F10	1.52982	3.22531e-06
Mmrn2	1.02783	2.34573e-05		Ces1e	-1.43936	3.22531e-06
Filip1l	-1.0112	2.34797e-05		Cd274	3.18062	3.22531e-06
Itga2b	2.27857	2.36583e-05		Gbp3	2.84107	3.22531e-06
Gtf2b	-1.20514	2.3897e-05		Csf2	1.13387	3.22531e-06
Col6a2	1.63015	2.39594e-05		Taok3	1.21304	3.22531e-06
Rtp4	2.29996	2.43804e-05		Qpctl	1.19882	3.22531e-06
Olfr1410	1.44651	2.43804e-05		Msr1	2.91413	3.23995e-06
Gpx8	-1.09496	2.43804e-05		E330016A19Rik	1.35895	3.25669e-06
Ttc7	1.0586	2.43804e-05		Ctss	1.28052	3.26404e-06
Ttyh1	-1.24133	2.43804e-05		Tcstv1	2.41545	3.26404e-06
Tspan4	1.05703	2.45448e-05		Cst7	2.46821	3.26404e-06
Etnk1	1.35729	2.48483e-05		2010317E24Rik	1.17475	3.34155e-06
Hist1h2ba	-1.31319	2.48993e-05		Lgals9	2.45601	3.39197e-06
0610007P08Rik	-1.39455	2.48993e-05		Vav1	2.01059	3.43778e-06
BC023829	-1.07213	2.48993e-05		Slc30a4	-1.25139	3.45424e-06
Lrrc58	1.03557	2.48993e-05		Myd88	1.18797	3.4904e-06
Mum1l1	-1.58186	2.48993e-05		Katnb1	1.07545	3.52518e-06
Lfng	-1.69751	2.48993e-05		Igfbp3	-2.18076	3.55241e-06
Susd2	1.67079	2.48993e-05		H2-Q10	2.23681	3.55241e-06
Cd37	1.34322	2.49932e-05		Gdf15	1.39427	3.56778e-06
Cd79a	1.1452	2.49932e-05		Galns	1.41297	3.59771e-06
Bbs7	-1.3814	2.49932e-05		Ifi202b	3.5019	3.59771e-06
Ntn1	1.46547	2.49932e-05		Pitx1	-2.3011	3.59771e-06
Pkd2l2	-1.52533	2.49932e-05		Otop3	-1.85695	3.59771e-06
C1qtnf7	-1.23535	2.49932e-05		Fhit	-1.57832	3.59771e-06
Adam8	1.40367	2.49932e-05		Lilrb3	2.14658	3.59771e-06
Oxa1l	1.00041	2.49932e-05		Gzmb	3.42868	3.63084e-06
Tbc1d8	-1.09766	2.49932e-05		2900009J20Rik	-1.18517	3.63084e-06
Nmd3	-1.30684	2.49932e-05		Nfkb2	1.58952	3.63084e-06
Gm9975	1.40426	2.49932e-05		Hcls1	1.9317	3.63513e-06
Sar1b	-1.14916	2.49932e-05		Cyp4a12a	-2.05176	3.66242e-06
Zfp53	-1.29421	2.49932e-05		Olfr1362	-2.09434	3.66242e-06
5031425E22Rik	-1.36952	2.49932e-05		Baiap2l1	-1.26433	3.6828e-06
Tcf7l1	1.4844	2.49932e-05		Lepre1	1.654	3.72995e-06
Sct	2.291	2.49932e-05		Ncapd2	1.86405	3.74589e-06
1110032A03Rik	-1.31793	2.49932e-05		Igsf6	2.04052	3.74752e-06
Npnt	1.42748	2.49932e-05		Atp1a3	2.01403	3.75342e-06
Pkmyt1	1.10364	2.49932e-05		Gsta2	-2.01115	3.75822e-06
Kdm6b	1.35957	2.49932e-05		Slc7a8	2.46288	3.75822e-06
Fn1	2.05853	2.50293e-05		Rapgefl1	-1.7883	3.75822e-06
Brd4	1.24055	2.50293e-05		C1ra	1.61122	3.75822e-06
Gm9757	1.74624	2.50293e-05		H2-Q5	2.19511	3.75822e-06
3300002A11Rik	-1.54905	2.50293e-05		Fen1	1.63805	3.7697e-06
Lactb	1.11061	2.50293e-05		Bcl9	1.99194	3.80215e-06
Tm4sf1	-1.22554	2.50293e-05		Lypd2	-2.51406	3.80215e-06
Olfm1	1.13195	2.50293e-05		Aloxe3	-2.44022	3.80215e-06
Fcgr1	2.1678	2.50681e-05		Klk1b3	2.51327	3.81963e-06
Mtmr10	-1.01616	2.50681e-05		Esyt1	1.24384	3.81963e-06
Hlf	1.86115	2.50681e-05		Darc	1.96093	3.8392e-06
Gjd3	2.70198	2.53227e-05		Plbd2	1.21454	3.83981e-06
Heg1	1.50075	2.53227e-05		C130026I21Rik	2.81792	3.93898e-06
D230018H15Rik	-1.00642	2.55656e-05		Klk1b27	3.04607	3.95207e-06
Mfap5	-1.00984	2.55656e-05		Ripk3	1.33613	3.95207e-06
Fzd5	1.30538	2.56892e-05		Plk1	1.90206	3.95207e-06
Pofut1	1.01709	2.56892e-05		Myo1f	1.75724	3.95207e-06
Zfp647	-1.04865	2.56892e-05		Adam8	1.69383	3.96114e-06
Clec4g	-1.55683	2.60634e-05		Arc	1.60787	3.97084e-06
AW209491	-1.02807	2.62493e-05		Tap1	3.6759	3.97084e-06
Dus4l	-1.96475	2.62513e-05		Cd7	1.53816	3.97084e-06
3110067C02Rik	-1.20948	2.63085e-05		Pram1	1.16695	3.973e-06
Trim3	-1.19226	2.63099e-05		Crlf2	1.62402	4.00337e-06
C130039O16Rik	1.42657	2.63099e-05		Batf2	2.81213	4.01507e-06
Plekha4	1.30708	2.6326e-05		Heatr2	1.05142	4.02207e-06
Tpk1	-1.20399	2.6326e-05		Vcan	2.19708	4.02207e-06
Tex15	-1.38252	2.63353e-05		Oas2	3.61565	4.02207e-06
Akr1c14	-1.19943	2.64031e-05		Snx20	1.58838	4.02207e-06
Srp54a	-1.19627	2.65951e-05		Plac9	-1.12528	4.02207e-06
Taok3	1.10001	2.66313e-05		Fanci	1.69701	4.02207e-06
BC006779	1.36077	2.67912e-05		Plekhb1	-1.24077	4.04684e-06
Dmkn	-1.24004	2.67912e-05		Gm11127	2.25352	4.04684e-06
Sik3	1.21271	2.67912e-05		Rhbdf2	1.54262	4.05765e-06
Hilpda	-1.12742	2.68169e-05		Ctps	1.19017	4.05765e-06
6720473M08Rik	-1.40414	2.68169e-05		Rgs16	2.21536	4.24155e-06
D230002A01Rik	1.26496	2.69084e-05		Tst	-1.37389	4.29747e-06
Mrpl22	-1.03724	2.7118e-05		Tnip1	1.16045	4.30378e-06
Numb	-1.11679	2.71325e-05		Spats2l	1.87394	4.34482e-06
Saa2	1.08116	2.71325e-05		Mmp7	1.68697	4.34482e-06
Cysltr1	-1.35458	2.71325e-05		Fn1	2.21065	4.37325e-06
Mthfd1l	1.25963	2.72351e-05		Gm14446	3.03969	4.41561e-06
A030009H04Rik	-1.16419	2.7466e-05		Gm4951	4.04697	4.47598e-06
1700020O03Rik	-1.00717	2.76807e-05		Atf7ip	1.23954	4.47598e-06
Slfn10-ps	2.38476	2.7809e-05		Irf2	1.47707	4.51993e-06
Sec23a	-1.06283	2.79098e-05		Pld4	2.19855	4.51993e-06
Hmg20b	1.11529	2.79098e-05		Eomes	2.43409	4.51993e-06
Fzd3	-1.17466	2.79098e-05		Plekha4	1.73791	4.51993e-06
Ftl1	-1.23981	2.79098e-05		Scrn3	-1.40757	4.53449e-06
Tbc1d16	1.51112	2.79098e-05		Ifi205	2.46687	4.56631e-06
Etaa1	-1.16884	2.79098e-05		Uba7	2.08418	4.56631e-06
Dcakd	1.35579	2.79098e-05		Evi5	-1.17108	4.58114e-06
Wscd2	1.03945	2.79098e-05		Hpx	1.80748	4.62347e-06
Lyrm1	-1.41416	2.79098e-05		Tnfaip2	1.35129	4.62347e-06
Prdm16	1.00371	2.79098e-05		BC013712	2.29272	4.62347e-06
AA987161	-1.03869	2.79098e-05		Aif1	2.64442	4.62347e-06
Cacna2d2	-1.45831	2.79098e-05		Tbc1d2	1.39404	4.62347e-06
St7l	-1.33744	2.79098e-05		Cdk1	1.78517	4.65215e-06
1700105P06Rik	1.76295	2.79098e-05		Phf17	-1.0535	4.65646e-06
Slfn8	2.24213	2.79098e-05		C4b	2.51404	4.71405e-06
Myh7	1.75028	2.79098e-05		Oas1b	2.3857	4.74997e-06
Shroom3	1.33463	2.79098e-05		Il1b	2.44044	4.74997e-06
Col4a3	-1.10643	2.79098e-05		Fkbp10	1.09874	4.74997e-06
4933411K20Rik	-1.04005	2.79098e-05		Ttbk2	-1.07907	4.74997e-06
Olfr870	-1.1776	2.79098e-05		Fam26f	4.07819	4.74997e-06
Prorsd1	-1.02408	2.79098e-05		Zfp60	-1.16984	4.74997e-06
2610301G19Rik	1.00059	2.79098e-05		H2-Bl	2.73611	4.84019e-06
LOC100504758	-1.01189	2.79098e-05		Lrrc48	-1.39434	4.84019e-06
Igsf3	1.20273	2.79787e-05		Slc11a1	1.68461	4.84019e-06
Pik3ip1	1.45766	2.82438e-05		Fscn1	1.60096	4.84019e-06
Neurl3	1.66404	2.82462e-05		Ifitm6	2.45653	4.84019e-06
Ankrd49	-1.02056	2.84709e-05		Tgfb1	1.43904	4.84659e-06
Gm4955	3.6554	2.86007e-05		Scgb3a2	-1.74974	4.91303e-06
Atp2b2	1.13411	2.86007e-05		Ms4a6b	2.55777	4.91303e-06
Sdk1	1.33888	2.86149e-05		Noxo1	1.50542	4.91303e-06
Mpv17	-1.15655	2.86149e-05		Gramd1c	-1.16494	4.91303e-06
Nolc1	1.07239	2.86149e-05		Ifng	4.35569	4.91303e-06
Ttc1	-1.08356	2.86149e-05		Kcne2	-1.87397	4.91303e-06
Serpinc1	1.3933	2.86149e-05		Arhgef33	-1.38957	4.92572e-06
Samd9l	1.45145	2.86149e-05		Gm12250	3.91197	4.94218e-06
Nxt2	-1.61703	2.8676e-05		Megf9	-1.07624	4.94218e-06
Tmod3	-1.2187	2.87624e-05		Slc24a6	1.21739	4.94218e-06
Tff2	-3.3433	2.87624e-05		Dgkb	-1.51781	4.94218e-06
Dhx15	-1.04383	2.88929e-05		Zfp959	-1.06517	4.9585e-06
Serpina3c	-1.1443	2.89986e-05		Mt2	1.42069	4.97208e-06
Adam10	1.14283	2.89986e-05		Fam82b	-1.04029	4.97208e-06
Aatk	1.21033	2.9087e-05		Lrrc25	2.5107	4.97208e-06
Gaa	1.34566	2.95214e-05		Pstpip1	1.82806	4.97433e-06
Rbbp9	-1.03412	2.95214e-05		Mlkl	2.42392	5.01746e-06
Ppm1k	1.24667	2.96879e-05		Cdca3	1.92792	5.0175e-06
2610002J23Rik	-1.08696	2.97663e-05		Ccnf	1.90932	5.02752e-06
Ankrd50	-1.60015	2.97663e-05		9030411K21Rik	-1.136	5.02752e-06
Gmps	-1.00699	2.97663e-05		Scgb1c1	-1.43655	5.03938e-06
Pldn	-1.13942	3.00488e-05		Tm9sf1	1.03039	5.04124e-06
Leo1	-1.03098	3.00488e-05		Pkmyt1	1.72615	5.05461e-06
Cox18	1.11008	3.00488e-05		Olfm1	1.3695	5.0824e-06
Daxx	1.62619	3.05027e-05		5031426D15Rik	-1.46155	5.0824e-06
Eltd1	-1.37989	3.07454e-05		Mpv17	-1.10361	5.10393e-06
Gstm5	-1.23808	3.09304e-05		Otud6b	-1.2663	5.10934e-06
2610305D13Rik	-1.29714	3.09304e-05		Lgmn	1.23299	5.14098e-06
Thbs1	1.94644	3.09304e-05		Gpc4	1.17218	5.15216e-06
Git1	1.00452	3.11104e-05		Irgm1	2.66745	5.18524e-06
Dhx58	2.52891	3.11297e-05		Ppm1h	1.12561	5.25866e-06
Exd2	-1.2944	3.11297e-05		Tacstd2	1.57078	5.29339e-06
Pqlc3	-1.13012	3.11297e-05		Pus1	1.32235	5.31281e-06
Prkrir	-1.12116	3.11297e-05		Gulp1	-1.15233	5.37349e-06
Tap2	1.79838	3.11297e-05		Krt13	-2.88402	5.37349e-06
Dkc1	-1.25509	3.14281e-05		Frrs1	1.08479	5.37349e-06
Taf6l	1.1319	3.14819e-05		Mmp8	2.28721	5.37392e-06
Ppp2cb	1.47372	3.19861e-05		C1qtnf7	-1.45433	5.39936e-06
9230114K14Rik	-1.24931	3.19861e-05		Tbc1d30	-1.29	5.47574e-06
Gbp5	3.69547	3.20119e-05		Gm5161	1.19782	5.63282e-06
Lrg1	1.45548	3.20119e-05		Mfap3l	-1.32018	5.64589e-06
Zfp120	-1.11656	3.20201e-05		Cxcl16	1.23677	5.67456e-06
Cfhr2	-1.20569	3.21354e-05		Cyp4f15	-1.36526	5.72793e-06
Sema6d	-1.00639	3.21354e-05		Serpinb6a	-1.34772	5.75935e-06
1700049J03Rik	1.43262	3.21354e-05		Gins2	1.37555	5.77128e-06
Tgfbr1	-1.1064	3.21354e-05		Pnpla2	1.15475	5.81911e-06
Hist1h1e	1.07339	3.22289e-05		Ccbl1	-1.06923	5.82974e-06
Fjx1	1.44448	3.22289e-05		Fbxl7	-1.29023	5.85097e-06
Gm5085	-1.02502	3.22289e-05		Ifi47	2.29537	5.85808e-06
Lrch4	1.11718	3.22289e-05		Bcl2l15	1.99094	5.92942e-06
Slc18a2	-1.02253	3.23028e-05		9530026P05Rik	-1.62501	5.93254e-06
Fktn	-1.17543	3.25954e-05		Ttc7	1.24067	5.98469e-06
Mfsd4	-1.07033	3.26375e-05		Mgst1	-1.32176	5.99942e-06
Zscan30	-1.46947	3.26375e-05		2022-09-09	1.07121	5.99942e-06
Myadm	1.10422	3.26375e-05		Zfp189	-1.03873	6.02433e-06
Srsf5	1.9984	3.30114e-05		Ifi35	1.457	6.08202e-06
Gpihbp1	-1.06021	3.34835e-05		Adamtsl1	1.29762	6.08202e-06
Olfml2a	-1.09591	3.35673e-05		Steap4	1.40065	6.13477e-06
Rraga	-1.31026	3.35673e-05		H2-D1	2.22381	6.19986e-06
Smarcc2	1.04254	3.35673e-05		Mcm3	1.20652	6.21025e-06
Gm20558	-1.03812	3.37402e-05		Fam199x	-1.05382	6.26279e-06
Cetn2	-1.10754	3.37402e-05		P2ry6	1.66794	6.28399e-06
Lactb2	-1.21465	3.37402e-05		Aurkb	2.50482	6.28399e-06
Snord33	-1.67683	3.37402e-05		Hmox1	1.16381	6.29106e-06
Fam198b	-1.29149	3.37402e-05		Gmps	-1.2324	6.29106e-06
Ptpn9	-1.12549	3.38883e-05		Mia1	-1.29485	6.31491e-06
Rnf11	-1.07804	3.42175e-05		5730564C23Rik	-1.5119	6.35101e-06
Cyb5	-1.44329	3.42213e-05		Slfn2	2.37351	6.38535e-06
Abcd2	-1.21264	3.42213e-05		Bbip1	-1.00671	6.38535e-06
Fam174a	-1.10115	3.44127e-05		Gzf1	-1.13818	6.51204e-06
Krit1	-1.20187	3.48836e-05		9930012K11Rik	-1.01975	6.56204e-06
Pcgf3	-1.18341	3.50699e-05		Zc3hav1	1.85157	6.63765e-06
Mxra7	1.18263	3.50699e-05		Trim34a	1.83201	6.67611e-06
F630048H11Rik	-1.03222	3.50699e-05		Rasa4	1.40394	6.67611e-06
Hrsp12	-1.16737	3.50699e-05		Sgtb	-1.12591	6.67611e-06
Hnrnpa0	1.18258	3.50699e-05		Cyp4f18	1.21971	6.75469e-06
Med21	-1.15124	3.50699e-05		Rac2	1.62489	6.75469e-06
Npl	-1.72248	3.50699e-05		Sema4a	1.04499	6.75469e-06
1810063B05Rik	-1.06071	3.50699e-05		Gbp6	3.1939	6.7802e-06
Gpr125	-1.00596	3.54266e-05		Ifi44	4.6057	6.78973e-06
Gm6155	-1.308	3.5469e-05		Stat1	2.08704	6.78973e-06
2410002O22Rik	-1.19049	3.5469e-05		Sdc3	1.6942	6.78973e-06
Blnk	1.30374	3.5469e-05		Clk1	-1.27097	6.78973e-06
Znfx1	1.62933	3.5469e-05		Emb	-1.1157	6.81405e-06
Kctd8	-1.16448	3.55523e-05		H2-M2	2.45891	6.81405e-06
St6galnac3	-1.35435	3.55644e-05		Tgtp1	2.92164	6.86979e-06
Serpinb6a	-1.32706	3.55734e-05		Ncf2	1.11392	6.93606e-06
Eif2ak2	1.67346	3.55734e-05		Ppa1	1.42023	6.93796e-06
Pglyrp1	-1.58319	3.5893e-05		Asgr1	-1.84867	6.93796e-06
Cenpc1	-1.13565	3.5893e-05		Rab8b	1.21664	6.96025e-06
Evi5	-1.28672	3.5893e-05		Tuba1c	1.17012	6.9726e-06
Rnf34	-1.00573	3.60683e-05		Xdh	3.30582	6.99031e-06
Sars2	1.12654	3.6128e-05		Cd72	2.74826	7.02492e-06
Btaf1	-1.21697	3.6128e-05		Arid1a	1.24044	7.02492e-06
Hmgxb4	-1.19677	3.63008e-05		Ttc18	-1.15063	7.09018e-06
Wfdc1	-1.26355	3.63188e-05		Suv420h2	-2.62181	7.10142e-06
Parp10	1.24643	3.65295e-05		1500035N22Rik	-1.7853	7.10142e-06
Zfp36	1.5156	3.6625e-05		Angpt1	-1.21383	7.10142e-06
Ncdn	1.13466	3.68005e-05		Gatm	1.44444	7.13449e-06
Hecw2	-1.19711	3.70698e-05		Dynlt3	-1.13344	7.18717e-06
Oas1b	1.71826	3.70698e-05		Nek2	1.13123	7.24686e-06
Bbip1	-1.00121	3.70698e-05		Ace2	-1.26369	7.31733e-06
Rfx3	-1.25516	3.70698e-05		Lypd6	-1.54588	7.33728e-06
Pde7b	1.08655	3.70698e-05		C2	1.72069	7.34074e-06
Akr1e1	-1.00701	3.70698e-05		Mgat4a	1.51063	7.45633e-06
Agap1	1.00606	3.70698e-05		Socs3	1.8486	7.45762e-06
Rnf213	1.80649	3.70698e-05		Sp100	1.67729	7.50281e-06
Pik3cd	1.1154	3.70698e-05		Cxcl17	1.36103	7.50983e-06
Atp9a	1.57414	3.70698e-05		Rassf5	1.29228	7.55596e-06
Dctn1	1.14693	3.70698e-05		Noc4l	1.00739	7.58512e-06
Alg13	-1.06337	3.70698e-05		Nfix	1.74399	7.62196e-06
Runx3	1.28951	3.70698e-05		Cd68	2.41386	7.66241e-06
Acn9	-1.30602	3.70698e-05		Ppp1r14c	-1.37105	7.70608e-06
Bgn	1.06443	3.70698e-05		Itgam	2.10456	7.70608e-06
Rnf214	1.53526	3.71952e-05		Creb3l1	1.03782	7.73457e-06
Bcorl1	1.28576	3.72887e-05		Chaf1b	1.60564	7.75268e-06
Wdr11	1.16708	3.72887e-05		Plcg2	1.24716	7.75649e-06
Kdm5b	1.31627	3.79293e-05		Ovol1	-1.78132	7.75909e-06
Chaf1b	1.31287	3.79293e-05		Prf1	2.53832	7.80919e-06
Ccl2	2.67985	3.79293e-05		Kif22	1.41949	7.82469e-06
Gnpda2	-1.00901	3.79293e-05		2210011G09Rik	-1.00154	7.89481e-06
Trafd1	1.35565	3.79293e-05		Hepacam2	-1.21378	8.00513e-06
Serpina3n	1.61168	3.80213e-05		Slc26a4	2.73149	8.00513e-06
Zranb2	1.0008	3.80658e-05		Slc39a4	1.77194	8.00513e-06
Hcls1	1.00475	3.83206e-05		Atf3	1.67813	8.00513e-06
Nudt2	-1.12005	3.83595e-05		Ceacam2	2.29716	8.02616e-06
Stmn2	-1.25263	3.83595e-05		E230008O15Rik	-1.06867	8.13578e-06
Zc3hav1	1.44204	3.83595e-05		C130050O18Rik	1.09124	8.15103e-06
Gng2	-1.08938	3.87717e-05		Lrg1	2.13243	8.20151e-06
Hgs	1.02938	3.87717e-05		9130002K18Rik	-1.15797	8.21021e-06
Cetn4	-1.11266	3.87717e-05		Rnase4	-1.33984	8.2199e-06
Hspg2	1.36409	3.87717e-05		Slco4a1	1.27138	8.2199e-06
Ckap4	1.11874	3.87717e-05		Agmo	-1.33078	8.2199e-06
Usp32	-1.27528	3.90244e-05		Trp63	-1.50047	8.32039e-06
Insig1	1.08942	3.90244e-05		Sirpb1b	2.35397	8.32523e-06
1110046J04Rik	-1.23434	3.90456e-05		Ost4	-1.08954	8.34577e-06
Siah1a	-1.12829	3.90456e-05		Chaf1a	1.3725	8.34577e-06
Rnd2	-1.10404	3.91491e-05		Csrnp1	1.25242	8.34577e-06
B930041F14Rik	1.05467	3.91491e-05		Samd9l	1.84461	8.39633e-06
Fam83h	1.01255	3.91601e-05		Mgat3	-1.27681	8.42578e-06
Adar	1.05015	3.93342e-05		Cox18	1.37687	8.46894e-06
Nog	3.09466	3.95679e-05		C77370	-1.10816	8.50674e-06
LOC100504178	1.29476	3.97692e-05		Gfra2	1.56704	8.52987e-06
Ints12	-1.13927	4.01418e-05		Slc9a1	1.09976	8.52987e-06
Tlr9	1.10698	4.01727e-05		9930111J21Rik2	1.93736	8.53361e-06
Tcirg1	1.12809	4.02388e-05		Nme3	-1.02953	8.626e-06
Maml2	1.35897	4.02487e-05		9530051G07Rik	-1.0071	8.63367e-06
Kitl	-1.2367	4.05289e-05		Akr1c14	-1.14136	8.73216e-06
Zfp472	-1.02538	4.07141e-05		Ifi203	1.77867	8.77397e-06
9130002K18Rik	-1.04894	4.11369e-05		5830474E16Rik	-1.55441	8.77397e-06
Fbxw17	1.28823	4.11369e-05		Cyb5	-1.34411	8.80143e-06
Tcf21	-1.14717	4.11369e-05		1700019L03Rik	-1.23388	8.80143e-06
Ltf	-1.60155	4.11465e-05		Iigp1	3.45849	8.80143e-06
Stard6	-1.19105	4.11465e-05		Parp12	1.84666	8.80143e-06
Parvb	1.05962	4.11465e-05		Melk	1.89769	8.82223e-06
Ncstn	1.1815	4.11465e-05		Fignl1	1.53726	8.97211e-06
Cd22	1.42496	4.11465e-05		Coro1b	1.33989	8.97211e-06
Nup43	-1.18421	4.12168e-05		Ccl5	2.47181	8.97211e-06
Pnpla5	1.18589	4.13952e-05		Polr3g	-1.05783	8.97211e-06
Nebl	-1.0362	4.13952e-05		Grin2d	1.96509	8.98022e-06
3110052M02Rik	-1.2052	4.14947e-05		H2-D4	2.29205	8.98022e-06
Uba1	1.19824	4.17818e-05		Nfam1	1.53039	9.01101e-06
Bhlhe40	1.10669	4.17818e-05		Uba1	1.58923	9.02415e-06
Trim34a	1.21635	4.17818e-05		Kdm6b	1.53394	9.06067e-06
Rnft1	-1.10855	4.17818e-05		Ddx24	1.01556	9.06067e-06
Hlx	1.20505	4.17818e-05		Tcof1	1.31367	9.13903e-06
Mphosph8	-1.02264	4.17818e-05		Numb	-1.0243	9.13903e-06
Sorl1	1.13128	4.18782e-05		Shcbp1	1.31192	9.13903e-06
Bpifa1	-2.65488	4.18941e-05		Tgm3	-1.71802	9.13903e-06
Zfp58	-1.34059	4.18941e-05		Star	-1.00326	9.13903e-06
Lrrc48	-1.11834	4.223e-05		Pacs1	1.28564	9.13903e-06
Klhl5	-1.394	4.28501e-05		Cnpy2	-1.05922	9.15672e-06
1700029F09Rik	-1.30932	4.29958e-05		Bak1	1.21082	9.23412e-06
Siglec1	1.36198	4.29973e-05		Kctd8	-1.56077	9.25644e-06
Rna28s1	4.17408	4.30779e-05		Fzd5	1.09009	9.25644e-06
Fam122a	-1.05163	4.32291e-05		Fanca	1.84707	9.25664e-06
Numbl	2.29503	4.32291e-05		Cks1b	1.02473	9.29046e-06
Fam136a	-1.15924	4.34649e-05		Vnn3	1.84366	9.37921e-06
Slc39a4	1.37549	4.35517e-05		Evi2b	1.52647	9.41083e-06
Tacstd2	1.06596	4.36109e-05		Lcp2	1.75425	9.41083e-06
Uxs1	-1.13608	4.37052e-05		Calml3	-3.7804	9.46655e-06
Sec24a	-1.06081	4.38715e-05		Samsn1	1.45556	9.46655e-06
2310058N22Rik	-1.01835	4.52566e-05		Lair1	2.31048	9.53145e-06
Prps2	-1.12454	4.55391e-05		Scx	-1.08489	9.6213e-06
Fam57a	-1.48745	4.56804e-05		Stat3	1.001	9.64256e-06
Lmbrd1	-1.07401	4.5701e-05		Acsbg1	-2.07855	9.64256e-06
Zfp235	-1.16694	4.61212e-05		Dusp2	2.47243	9.70302e-06
Wibg	1.18766	4.61212e-05		Zfp790	-1.08708	9.72589e-06
Chd6	1.02975	4.61212e-05		1700027A23Rik	-1.079	9.81379e-06
Kctd4	-1.03977	4.61686e-05		4930430F08Rik	-1.0729	9.93396e-06
Cav2	-1.44316	4.61686e-05		Ftsjd2	1.0518	9.94223e-06
Tgm5	2.21928	4.62499e-05		2610008E11Rik	-1.02651	9.94448e-06
Fam13c	2.47203	4.63456e-05		Tapbp	2.28727	1.00357e-05
Gm13288	1.55848	4.65041e-05		Cd36	-1.02561	1.00835e-05
Lilra5	-1.33831	4.6581e-05		Ppfia4	1.77569	1.00903e-05
Vamp7	-1.2581	4.66522e-05		Cd300lf	2.40612	1.00903e-05
Alg2	-1.01729	4.66522e-05		Efhd2	1.18265	1.01124e-05
Hivep3	1.42667	4.73602e-05		Gbp2	2.12583	1.01124e-05
2900056M20Rik	-1.1563	4.75594e-05		H2-T24	1.84802	1.01242e-05
Spag1	-1.30313	4.77772e-05		Lrfn3	1.01843	1.01273e-05
Gm5784	1.21655	4.77772e-05		Alox5ap	1.1505	1.01273e-05
Fbxo8	-1.05296	4.82741e-05		Ncstn	1.17352	1.01273e-05
Enpp5	-1.05628	4.83667e-05		Selplg	1.25373	1.01273e-05
Gm4951	3.61311	4.83667e-05		Fabp12	-1.24359	1.01524e-05
Spata6	-1.25204	4.84727e-05		Cfhr2	-1.22699	1.01707e-05
Sod3	1.73753	4.85589e-05		Spata17	-1.09579	1.01707e-05
Ormdl1	-1.2078	4.88593e-05		Cd14	1.23172	1.01707e-05
Ung	1.28527	4.88758e-05		Ly6a	1.25379	1.02018e-05
Kif13a	1.11711	4.90682e-05		Tmem171	2.06037	1.02077e-05
Ly6e	1.38946	4.91268e-05		Slamf8	2.04845	1.02701e-05
Fbxo45	-1.33992	4.91933e-05		Amica1	1.64958	1.02794e-05
C1rb	1.21349	4.91933e-05		Lrr1	2.4044	1.02794e-05
BC028528	-1.0218	4.91933e-05		Siglec5	-1.03223	1.03121e-05
Ptprg	-1.4361	4.9723e-05		Htt	1.20178	1.03619e-05
Samd8	-1.0738	4.98133e-05		Klhdc1	-1.05758	1.03619e-05
Fam26e	-1.0512	4.98852e-05		Riiad1	-1.4706	1.03825e-05
E230008O15Rik	-1.10278	4.9947e-05		Ptger4	1.72926	1.03825e-05
Zfp811	-1.05953	4.9947e-05		Prpf39	-1.15068	1.03825e-05
Cdk5rap2	1.22298	5.00765e-05		P2rx6	-1.55368	1.04236e-05
Zfp790	-1.04995	5.03009e-05		Zfp217	1.42943	1.04439e-05
Slc25a22	1.55749	5.03009e-05		2310011J03Rik	1.10743	1.04627e-05
Ppp1r11	-1.11047	5.05121e-05		Dcakd	1.31375	1.04627e-05
Oas1f	2.38095	5.05141e-05		Cyp2a5	-2.32639	1.04627e-05
Chit1	3.99792	5.05141e-05		Fam169a	-1.17336	1.06053e-05
Trim12a	1.58696	5.05141e-05		Spn	1.44739	1.08101e-05
Dgkb	-1.0069	5.05141e-05		4933411K20Rik	-1.05229	1.08101e-05
Uhmk1	-1.10797	5.06607e-05		Trem3	2.37804	1.09054e-05
Fmo3	-1.02027	5.0759e-05		2900006A17Rik	-1.62872	1.10252e-05
H2-D1	1.12116	5.0775e-05		1700007G11Rik	-1.08796	1.10429e-05
Mgst1	-1.05091	5.12486e-05		Zc3h12a	1.79359	1.10486e-05
Ogdh	1.32357	5.12486e-05		Tmem56	-1.4814	1.10486e-05
Rgs19	-1.11686	5.12486e-05		Camk1d	1.06316	1.11159e-05
Tapbp	1.71917	5.12486e-05		Klra16	1.45119	1.12047e-05
Rnf31	1.09475	5.13609e-05		Nod2	1.40302	1.12206e-05
Larp4	-1.34208	5.18516e-05		Ckap4	1.36469	1.13297e-05
Csrnp1	1.06348	5.18516e-05		Mmp13	1.61006	1.13765e-05
Chst15	-1.37662	5.24514e-05		Hmga1	1.36687	1.13923e-05
4930473A06Rik	1.25121	5.29924e-05		Plekho2	1.26493	1.16189e-05
Uhrf1	1.29155	5.29999e-05		Top2a	2.16813	1.17082e-05
Setd1b	1.34339	5.31087e-05		Ly6i	1.87952	1.17082e-05
Tug1	-1.46967	5.34989e-05		Fermt3	2.17552	1.17594e-05
Nus1	-1.00878	5.37391e-05		Inhba	1.34193	1.17636e-05
Zfp57	-1.1533	5.39059e-05		Rnf19b	1.79721	1.1849e-05
Lrrc51	-1.00811	5.39059e-05		Gpr65	1.89393	1.18797e-05
Rbm47	1.09857	5.39059e-05		Gbp1	2.49836	1.18797e-05
Eomes	1.4386	5.39948e-05		Gvin1	2.05424	1.18797e-05
Bmpr1b	-1.27788	5.39948e-05		Cd59b	-1.22984	1.18887e-05
B230214O09Rik	1.05482	5.39948e-05		Parp11	1.77696	1.18957e-05
Cltc	-1.01603	5.39948e-05		Tnfsf14	1.10072	1.18994e-05
Nudcd2	-1.10849	5.39948e-05		Lrrc51	-1.16489	1.19029e-05
Ggh	-1.14464	5.40018e-05		Gpld1	-1.06813	1.19029e-05
Lrrc8b	1.03746	5.40018e-05		Rnf26	1.16427	1.20618e-05
Gm4371	-1.49082	5.40018e-05		Syngr2	1.40772	1.20772e-05
C78339	-1.03367	5.40298e-05		Mafb	1.96024	1.20772e-05
Fam190a	-1.09272	5.48146e-05		Ptpn1	1.07717	1.22128e-05
Rdx	-1.07906	5.48567e-05		AW209491	-1.32762	1.22288e-05
Tsix	-1.26821	5.52637e-05		Tcirg1	1.45669	1.22425e-05
Cd209f	-1.87168	5.53145e-05		Spc24	1.61766	1.22854e-05
Prickle2	-1.39045	5.53145e-05		Krt23	-1.04433	1.23731e-05
Cenpp	-1.01706	5.56219e-05		Wdr96	-1.31283	1.23995e-05
Dmxl1	-1.39586	5.60724e-05		Cd300a	1.93984	1.24226e-05
Tmed7	-1.00904	5.61018e-05		Col5a1	1.09349	1.24226e-05
B230337E12Rik	-1.13074	5.61889e-05		Fntb	1.04222	1.24226e-05
Esco1	-1.22092	5.61889e-05		Gsta1	-1.65571	1.24227e-05
Mettl9	-1.02953	5.62381e-05		Ociad2	-1.12126	1.24227e-05
Dlgap3	1.01358	5.6254e-05		Spa17	-1.35359	1.24516e-05
Trex1	1.23054	5.7824e-05		Ccno	1.2182	1.25108e-05
Vbp1	-1.23227	5.8289e-05		Chtf18	1.91495	1.25226e-05
Ctrb1	1.31475	5.8289e-05		B3gnt8	1.85693	1.25226e-05
Riiad1	-1.00589	5.89065e-05		Krt17	1.58976	1.25226e-05
Pdgfd	-1.1769	5.89671e-05		Mmgt1	-1.14984	1.25226e-05
Tor3a	1.4697	5.90445e-05		Arsk	-1.00347	1.2578e-05
Iffo2	1.05607	5.91332e-05		Lrrc58	1.03097	1.2578e-05
Lrrc49	-1.11187	5.91332e-05		Ntf3	-1.52485	1.2578e-05
Ankrd33b	-1.51475	5.92134e-05		9530083O12Rik	-1.35184	1.2578e-05
Ep300	1.09133	5.92134e-05		Brip1	1.34024	1.26549e-05
Ccl20	1.78866	5.95169e-05		Sema7a	1.08216	1.26775e-05
Cyp2j6	-1.0029	5.9593e-05		Ccdc153	-1.40208	1.27992e-05
Calcb	-1.7067	5.96444e-05		2900064K03Rik	-1.40413	1.28224e-05
Tfcp2l1	1.02649	5.96632e-05		Irf5	1.53574	1.28253e-05
Cyp4a12a	-1.91663	5.99071e-05		Fpgt	-1.14772	1.28795e-05
Fam118a	-1.1277	5.99379e-05		P2rx2	1.04643	1.28795e-05
Arid1a	1.01985	6.01929e-05		Zfp811	-1.37427	1.29825e-05
AI607873	1.70251	6.03245e-05		Trappc3	-1.08068	1.29825e-05
LOC668643	-1.27235	6.05946e-05		Tpx2	1.41753	1.30633e-05
Amn1	-1.14831	6.07751e-05		Mt4	-3.56523	1.31027e-05
Fam151b	-1.41513	6.07751e-05		Cd244	2.03793	1.31907e-05
Hnmt	-1.04235	6.1108e-05		Apoc2	2.05588	1.31925e-05
Ccl3	1.93866	6.1108e-05		Ccl20	2.84902	1.32249e-05
Itsn1	1.0373	6.13666e-05		C1rb	1.93099	1.32498e-05
2700038G22Rik	-1.29862	6.13666e-05		Pla2g7	1.76417	1.32684e-05
Dynll2	-1.00776	6.17558e-05		Cotl1	1.23776	1.3282e-05
Crygd	1.08902	6.17947e-05		Chit1	4.84453	1.33796e-05
Nr1i3	1.95101	6.18963e-05		Trip13	1.3829	1.34749e-05
Vsnl1	-1.06749	6.19222e-05		Cdkn3	1.12112	1.34749e-05
Macrod2	-1.24552	6.25485e-05		Mmp3	1.0871	1.37143e-05
Hpgd	-1.54898	6.25485e-05		Cyp3a13	-1.38694	1.37143e-05
Crip2	1.01316	6.26608e-05		C2cd4b	1.26416	1.37143e-05
Zswim4	1.34268	6.27887e-05		Sbno2	1.40038	1.38286e-05
Agmo	-1.01293	6.3192e-05		Ak7	-1.07842	1.40554e-05
Aifm2	1.06955	6.34166e-05		Tmem106b	-1.13315	1.40668e-05
Oas2	2.30667	6.3525e-05		Tppp	-1.37509	1.40707e-05
Ric3	-1.17032	6.3525e-05		Treml4	1.32159	1.40938e-05
Mctp1	-1.12043	6.3525e-05		Sgol2	1.35628	1.41287e-05
Foxn2	-1.32048	6.366e-05		Ep300	1.42339	1.41542e-05
Myo1d	1.18642	6.366e-05		Tnfaip8l2	1.08422	1.42579e-05
Ifit2	1.8418	6.38332e-05		Serf1	-1.0844	1.42579e-05
Ccdc88b	1.0559	6.38332e-05		Piwil4	1.07391	1.42579e-05
Gm4759	1.65711	6.3939e-05		Cyp2a4	-2.47123	1.42815e-05
Mtap7d3	-1.15726	6.44817e-05		Atf6b	1.08321	1.43472e-05
Bbox1	-1.4773	6.44964e-05		Stfa2l1	2.12046	1.43472e-05
1700010M22Rik	-1.04341	6.44964e-05		1110032A03Rik	-1.30633	1.4371e-05
Stk40	1.0923	6.45e-05		Tacc3	1.04337	1.4372e-05
Lamb2	1.42267	6.50391e-05		Csf2rb	1.34547	1.43961e-05
Klra5	-1.39787	6.64608e-05		D930015E06Rik	1.34889	1.43961e-05
Ctla2b	-1.04445	6.66073e-05		Pik3cd	1.6007	1.43961e-05
Fbxo30	-1.02102	6.66911e-05		Egfbp2	1.79507	1.44429e-05
Parp14	1.66584	6.67675e-05		Slc12a2	-1.03928	1.44429e-05
Erbb2ip	-1.08507	6.69551e-05		Lgals3	1.09412	1.44429e-05
Pyhin1	1.87291	6.71418e-05		Adam10	1.01325	1.44429e-05
Muc4	1.02844	6.76085e-05		Mcm5	1.6986	1.44429e-05
6720462K09Rik	-1.12538	6.76085e-05		Nbeal1	-1.03447	1.44429e-05
Egr1	2.81743	6.77619e-05		Hnmt	-1.18539	1.44429e-05
2022-09-07	-1.06513	6.80555e-05		Spns3	1.09312	1.45224e-05
Slfn3	1.62763	6.81982e-05		Cyp7b1	1.96201	1.4792e-05
Sepsecs	-1.27844	6.82514e-05		Map3k9	1.12876	1.48499e-05
Gsdmcl1	1.24975	6.90354e-05		Lrch4	1.78308	1.48617e-05
A830080D01Rik	-1.46904	6.90354e-05		Zfp36	1.68438	1.49698e-05
Il1rn	1.11463	6.90512e-05		Gm8995	2.09731	1.49698e-05
Xdh	2.26411	6.92241e-05		Galnt10	1.04688	1.49698e-05
Ormdl2	-1.09104	6.95714e-05		Hist1h2ab	1.82607	1.49698e-05
Trim30d	1.57841	6.95714e-05		Nkg7	2.00013	1.49698e-05
Pde4b	-1.36865	6.95714e-05		Cnp	1.24397	1.49714e-05
Dmtf1	-1.16966	6.95714e-05		Mxd3	1.47612	1.49714e-05
Ccdc129	-1.47969	7.16446e-05		Chmp6	1.00812	1.49714e-05
Efcab1	-1.09795	7.1903e-05		Rad51	1.71074	1.49714e-05
Gm4788	-1.76642	7.25221e-05		Slamf7	2.61468	1.49714e-05
Cd70	1.69759	7.25429e-05		Apobec1	1.98234	1.50387e-05
Rgs17	-1.27488	7.26085e-05		Rap1gap2	1.12572	1.50438e-05
Zfp759	-1.29301	7.2957e-05		Serping1	1.21678	1.50606e-05
Lypd2	-1.25101	7.2957e-05		Tnrc18	1.62765	1.50606e-05
Ern1	1.18011	7.35472e-05		Hist1h2al	-1.44419	1.51071e-05
Eps8l2	1.02633	7.35581e-05		Pacsin1	2.18306	1.51499e-05
Serpinb6b	-1.05491	7.36827e-05		Hpse	1.92589	1.52136e-05
Itgb7	1.113	7.36827e-05		Rgs1	2.88483	1.52136e-05
Nipsnap3b	-1.01359	7.36827e-05		Adprh	1.01784	1.53603e-05
Rnls	-1.07647	7.40471e-05		Rgma	1.0553	1.54643e-05
Phf11	1.41295	7.40471e-05		B830007D08Rik	-1.12313	1.55503e-05
Depdc7	-1.19691	7.42123e-05		Cacna2d2	-1.05897	1.55503e-05
Ipo7	-1.03997	7.42661e-05		Mid2	-1.03656	1.55503e-05
Pgap1	-1.60017	7.42661e-05		Mpeg1	1.47861	1.56743e-05
9130017N09Rik	1.30988	7.42661e-05		Trpm2	1.6715	1.56743e-05
Hk3	1.07723	7.50947e-05		Ntrk1	1.86082	1.56938e-05
Lrrc4c	-1.12867	7.50947e-05		H2afx	1.77417	1.57254e-05
Areg	2.11336	7.57819e-05		Il2rg	2.1738	1.57254e-05
4933407C03Rik	1.03982	7.57819e-05		Klhl13	-1.25411	1.57801e-05
Prf1	1.01801	7.63278e-05		Il12rb1	2.36326	1.58037e-05
Srgap1	1.00687	7.67926e-05		Psmb9	1.78176	1.58129e-05
Vps37c	1.27025	7.69226e-05		Pdpn	1.16705	1.58666e-05
Uba7	1.64586	7.69226e-05		Ebi3	1.4669	1.58666e-05
Prrg1	-1.14752	7.69226e-05		Fbxw17	1.55576	1.58666e-05
Hace1	-1.07363	7.74659e-05		Hnrnpa0	1.13468	1.58666e-05
Clec2d	-1.43885	7.76145e-05		Dixdc1	-1.39245	1.58666e-05
Scmh1	1.02915	7.76451e-05		Cenpb	1.12262	1.59178e-05
Nars2	-1.22846	7.76676e-05		C1galt1	-1.20878	1.59704e-05
Pex3	-1.08888	7.77905e-05		Nfil3	1.17642	1.59783e-05
Lypla1	-1.11337	7.78971e-05		Aebp1	1.34381	1.59783e-05
Sacm1l	-1.11345	7.80245e-05		Dennd1a	1.08205	1.59783e-05
Sp100	1.14528	7.86791e-05		Arsi	1.22729	1.60412e-05
Bcl3	1.67132	7.86791e-05		Zc3h3	1.2442	1.62698e-05
Rnf219	-1.14476	7.88394e-05		Pydc4	1.87602	1.62698e-05
D230015J17Rik	-1.06323	7.90771e-05		Sod3	2.04253	1.64896e-05
Gm9777	1.5022	7.90771e-05		Col2a1	2.08416	1.64896e-05
Xaf1	1.61601	7.94151e-05		Pfn1	1.52567	1.6495e-05
Apbb1ip	1.02174	7.94151e-05		Klk1b4	1.85719	1.6495e-05
Ptx3	1.13249	7.94717e-05		D030005H02Rik	-1.19317	1.65317e-05
Atp6v1h	-1.04453	8.06769e-05		Slc24a5	-1.10328	1.66418e-05
Scfd1	-1.01861	8.08151e-05		Ptpn6	1.39847	1.67796e-05
Epb4.1l5	-1.1947	8.08933e-05		Tlr6	1.50715	1.68014e-05
Gm3604	-1.17861	8.12082e-05		Zcchc2	1.0658	1.69495e-05
Zfp433	-1.10349	8.14126e-05		Pccb	-1.14328	1.69495e-05
4930486L24Rik	-1.42686	8.14126e-05		Prrt1	-1.66208	1.69495e-05
Heatr7b1	1.09225	8.25019e-05		Cnfn	-2.66479	1.69495e-05
Ager	1.22992	8.29556e-05		Pi4k2b	-1.04892	1.69991e-05
Fscn1	1.01409	8.47119e-05		Srsf3	-1.04125	1.70175e-05
Zfp273	-1.16048	8.52192e-05		Nbas	1.38489	1.70942e-05
Arfip1	-1.02604	8.52351e-05		Cep55	1.66144	1.71682e-05
Slc39a10	-1.52224	8.52351e-05		Ube2l6	1.71377	1.7213e-05
Cib2	-1.30877	8.58527e-05		Was	1.10981	1.72471e-05
Foxo6	1.78257	8.5859e-05		Pkd2l2	-1.38439	1.73413e-05
Cys1	1.17459	8.68428e-05		Asf1b	1.35293	1.73413e-05
Scrt2	-1.25689	8.74846e-05		Fes	1.14662	1.74781e-05
Pigs	1.08701	8.86781e-05		Kif21b	1.52101	1.74949e-05
Bst2	1.3623	8.9272e-05		Slc37a2	1.51784	1.74949e-05
Aard	-1.55235	8.94924e-05		Zfp617	-1.03708	1.75831e-05
Tap1	2.66973	8.96206e-05		Gbp9	2.13255	1.76688e-05
Suv420h2	-1.63948	8.96206e-05		Agap2	1.68618	1.78141e-05
Gstm1	1.05032	9.02535e-05		C230072F16Rik	-1.06626	1.78141e-05
Zbtb46	-1.137	9.05461e-05		Nup93	1.01461	1.79312e-05
Fads6	1.03107	9.05527e-05		9330175E14Rik	2.59337	1.79426e-05
Rbm15b	1.08797	9.11504e-05		Plod3	1.29042	1.79529e-05
Mob3c	-1.29074	9.14431e-05		Gck	-1.59907	1.79837e-05
Apol6	1.95686	9.14596e-05		Efcab10	-1.14258	1.79998e-05
Gpr98	-1.24368	9.15783e-05		Tsfm	1.05215	1.79999e-05
Trim30a	1.51459	9.28163e-05		Chst15	-1.55322	1.79999e-05
Srp68	1.09954	9.38814e-05		Prom2	-1.89386	1.79999e-05
Olfr578	1.06412	9.48494e-05		Dnahc7a	-1.13076	1.80513e-05
Lox	-1.41412	9.49397e-05		D230018H15Rik	-1.46423	1.80631e-05
Cox5a	1.02533	9.50053e-05		Tcf19	1.52926	1.82444e-05
Ifi44	2.94832	9.53374e-05		Cxcr2	1.63305	1.82995e-05
BC048507	-1.12387	9.54708e-05		Gaa	1.11718	1.84256e-05
Sec62	-1.09119	9.54941e-05		Mov10	1.37791	1.8568e-05
Ddr1	1.08116	9.55566e-05		Rfc5	1.03709	1.85843e-05
Per1	1.16592	9.55566e-05		Wdfy4	1.01339	1.86143e-05
Pla2g4a	-1.03988	9.66626e-05		Pik3ap1	1.35405	1.87656e-05
Siglec5	-1.06684	9.67452e-05		Eppk1	1.70084	1.88145e-05
Akr1c12	-1.05894	9.73625e-05		Nlrp2	-1.20646	1.89052e-05
Tnk2	1.18002	9.81279e-05		Slc22a16	1.17833	1.89175e-05
Plec	1.74506	9.85893e-05		Olfr433	1.43519	1.89344e-05
St8sia6	-1.3357	9.9379e-05		2310068C19Rik	-1.25917	1.89412e-05
Hsd3b4	-1.28723	9.94913e-05		Pim1	1.8249	1.89548e-05
Fcrls	-1.07413	0.000100749		Susd2	1.52545	1.89624e-05
Inpp1	1.95718	0.000101048		Etv5	1.0236	1.89643e-05
Ank2	1.50515	0.000101744		Sh3bp1	1.1236	1.90352e-05
Scn10a	1.13085	0.000101967		Vac14	1.1104	1.91484e-05
Olfr571	1.60257	0.000102373		Osm	1.31436	1.91484e-05
Ifi205	1.45408	0.0001028		Neurl3	1.41577	1.92325e-05
Matr3	-1.01314	0.00010288		Slc25a22	1.79546	1.92656e-05
App	1.13096	0.000103262		Pir	-1.08209	1.95706e-05
Krt18	1.05425	0.000103578		Myadm	1.03132	1.96408e-05
Wfs1	1.06013	0.000103578		Cdc6	1.71862	1.96408e-05
Pak6	1.77002	0.000103578		Rrp12	1.55958	1.97693e-05
Ifi204	1.37087	0.000104195		Chst12	1.14635	1.97695e-05
Tmem89	1.35331	0.000104798		Ctse	1.28068	1.97712e-05
5031426D15Rik	-1.34312	0.000106979		Dynlrb2	-1.06673	1.97839e-05
Fam122b	-2.02897	0.000107828		Cib2	-1.66057	1.97922e-05
B430316J06Rik	-1.14177	0.000108484		Leprotl1	1.09638	1.99377e-05
Irf2	1.00684	0.000108531		Trove2	-1.02573	2.00165e-05
Tcstv3	1.08235	0.000108866		Gm5431	1.71204	2.02181e-05
Kank4	-1.00727	0.000110022		Prkrir	-1.15895	2.04282e-05
Ces2e	-1.22661	0.000110022		Mcm6	1.4542	2.05317e-05
Sntn	-1.37468	0.000110049		Apol9b	3.66386	2.08878e-05
Gm13253	-1.21121	0.00011048		Fblim1	1.51061	2.09332e-05
Nt5dc2	1.36731	0.000111403		Ms4a4d	2.06753	2.09332e-05
Crot	-1.06068	0.000111478		Fgr	1.328	2.09551e-05
Zfp677	-1.46622	0.000111583		Fam25c	-4.13309	2.1033e-05
Gck	-1.11587	0.000111592		Gm12770	-1.49432	2.11301e-05
E030004H24Rik	1.05403	0.000112116		Zfp647	-1.02651	2.11349e-05
Olfr930	1.03174	0.000112559		Prickle2	-1.06291	2.11349e-05
Dusp19	-1.06339	0.000112639		Dock2	1.53094	2.12851e-05
Anp32a	-1.23233	0.000113799		Tor1aip1	1.09716	2.1293e-05
Mme	1.01366	0.000114363		H2-DMa	1.61153	2.1293e-05
Hmcn1	-1.02292	0.000114543		Aoah	1.70732	2.14093e-05
Hebp2	-1.10064	0.000114674		C330027C09Rik	1.39963	2.14383e-05
Trgv2	-1.13192	0.000115426		Runx2	1.4266	2.15944e-05
Cdk5r2	2.23717	0.000116071		Duoxa1	-1.99417	2.16616e-05
Aldh1b1	1.49765	0.000116125		Tsix	-1.58061	2.18031e-05
Spats2l	1.0844	0.000116943		Papd7	1.0101	2.19231e-05
Tmem100	-1.6034	0.000118088		Pvrl4	1.16573	2.19231e-05
Rab5c	-1.45739	0.000118798		Gadd45g	1.24777	2.19231e-05
Pik3c2g	-1.01649	0.000118798		Vstm2a	-1.20695	2.19361e-05
Gm505	1.03234	0.000118798		Hyou1	1.41061	2.21455e-05
Zmat4	1.01799	0.000118798		Ccl8	2.71009	2.21455e-05
Gtpbp10	-1.06419	0.000118914		Fyb	1.67934	2.21638e-05
Hk2	1.81467	0.000119319		Itgb2	1.06491	2.21638e-05
Ccl12	2.24993	0.000119705		Nuak2	1.16343	2.22539e-05
Irf9	1.01916	0.000120003		Col6a2	1.38629	2.22539e-05
Tmeff2	-1.17386	0.000120623		Limch1	-1.00295	2.23638e-05
Cd72	1.14367	0.000121594		Gbp7	1.94553	2.24431e-05
Fermt3	1.06237	0.000122152		Cd180	1.3406	2.25621e-05
Kif18a	-1.39629	0.000122376		Tifab	1.33727	2.26446e-05
Ear10	-1.23723	0.000123753		Shroom3	1.39492	2.26446e-05
Nr4a1	1.17208	0.000125067		Irf8	1.2972	2.27072e-05
Cacybp	-1.20355	0.000127008		Ddx60	2.81248	2.27485e-05
Zfp788	-1.03504	0.00012874		Gm9757	1.40807	2.27958e-05
Gfra1	1.08181	0.00012874		Setd1b	1.16719	2.27958e-05
Fgfr1	1.05093	0.000129279		Gla	1.12729	2.28576e-05
Homer1	-1.23183	0.000129619		Tmprss2	-1.1051	2.32119e-05
9530019H20Rik	-1.44462	0.000130257		A930018M24Rik	-1.0476	2.3241e-05
Ifi202b	2.0164	0.000130257		Gnpda2	-1.03737	2.34442e-05
Mdh2	1.08673	0.000130257		E2f8	1.90622	2.34442e-05
Omd	-1.47007	0.000130916		Hist1h2ai	1.44775	2.35061e-05
9230110C19Rik	-1.37011	0.000131073		Psrc1	1.05799	2.35061e-05
Ear3	-1.27365	0.000131387		5430427O19Rik	1.63983	2.35061e-05
Slc27a3	1.016	0.000131776		Gm5331	1.04932	2.36135e-05
Csf1	1.09956	0.000133109		Gsdma	-3.19092	2.36596e-05
Shprh	-1.24928	0.000133964		Plce1	-1.2483	2.4055e-05
Gdf1	1.32447	0.00013409		Trim21	1.09446	2.4055e-05
Fam33a	-1.1791	0.000134498		Abce1	-1.01978	2.40969e-05
Slc27a4	1.02837	0.00013488		Cd209d	-1.57547	2.41252e-05
Omg	-1.58361	0.00013488		Pom121	1.1655	2.41586e-05
Arg1	-1.49936	0.000136308		Gins1	1.18735	2.45374e-05
Ppyr1	1.5829	0.00013647		Taf9b	-1.04298	2.46577e-05
Tyrobp	-1.09102	0.000138424		Il17ra	1.54203	2.47822e-05
Fam65b	1.07521	0.000138467		Pold1	1.06597	2.48421e-05
Asah1	-1.27192	0.000139809		Hcfc1	1.23225	2.50292e-05
Eno1	1.369	0.000139924		Dmtf1	-1.07267	2.51508e-05
Nedd1	-1.15689	0.000142613		Tk1	1.46749	2.53345e-05
Nudt5	-1.10992	0.000143824		Ctsw	1.74294	2.53598e-05
Cox10	1.18281	0.000146443		Pou3f1	3.65236	2.53598e-05
Bivm	-1.37073	0.000146726		Pcbd1	-1.00017	2.55247e-05
Zfp420	-1.05311	0.000146889		Samhd1	1.376	2.55247e-05
Cd48	-1.03083	0.0001469		Trim2	-1.13635	2.55247e-05
Hist1h1d	1.06221	0.000148013		Car13	1.2756	2.56999e-05
Tmem201	1.06483	0.000148644		Mmp19	1.39757	2.57103e-05
Yy2	-1.02543	0.000150522		Ifi27l2b	2.84176	2.57677e-05
Slc40a1	-1.01077	0.0001511		Gtpbp1	1.12005	2.57677e-05
Gbp3	2.22466	0.000152588		Tubb4a	1.24461	2.60163e-05
Ifitm3	1.00591	0.000154288		6720462K09Rik	-1.16325	2.61817e-05
Zfp9	-1.32367	0.000159907		Hck	1.24588	2.61817e-05
Ddx60	2.0271	0.000160322		Il10ra	1.72013	2.61896e-05
Fgfbp1	-1.11076	0.00016141		Gjb6	-1.11948	2.63202e-05
Psmb10	1.40386	0.000162755		Zc3h12d	2.44749	2.65001e-05
Olfr414	-1.30015	0.00016385		Gm19909	-1.15579	2.65661e-05
Timp2	1.31042	0.000164184		Tcf7l1	1.11438	2.66582e-05
Filip1	1.21836	0.00016569		Itih4	1.11406	2.67818e-05
C2	1.02139	0.000167939		Tmem89	1.54637	2.69835e-05
Socs1	2.43999	0.000168732		Plcb2	1.5182	2.71541e-05
Ntrk1	1.22305	0.000169364		Hivep3	1.40028	2.71541e-05
D18Ertd232e	-1.06264	0.00017018		Arhgap30	1.26509	2.72036e-05
Atp6v0d2	-1.28326	0.000171775		Dhx38	1.1273	2.72098e-05
Dusp2	1.18447	0.000171932		4933407C03Rik	1.24614	2.72939e-05
Hoxa7	1.13201	0.000175305		Trim14	1.04162	2.73208e-05
Apod	1.58487	0.000175459		D2Ertd750e	1.54871	2.74165e-05
Cyp2d12	1.03464	0.000175729		Flywch2	-1.01827	2.77284e-05
AI836003	-1.51421	0.000176104		Sf3b4	1.36308	2.79027e-05
Klhl4	-1.06285	0.000177677		Col1a2	1.15363	2.79519e-05
Ccdc162	1.03791	0.000178313		Asap3	1.06802	2.79519e-05
Atp1a4	1.10837	0.000178313		Ntn1	1.41516	2.81426e-05
Qpct	-1.12567	0.000178313		Tln1	1.16679	2.81867e-05
Car9	1.22063	0.000179405		Map4k1	1.21695	2.8316e-05
Stat1	1.65795	0.000180112		Rftn1	1.39241	2.88531e-05
Kcne3	-1.2618	0.000180669		Tbc1d1	1.28313	2.88531e-05
S1pr4	1.04357	0.000181843		Slc28a2	2.38669	2.90668e-05
Slc16a4	-1.12948	0.000182022		Rgs17	-1.08835	2.91021e-05
Rfx8	1.4726	0.000182731		Olig3	-1.11792	2.91945e-05
Alox15	1.36574	0.000182747		Slco4c1	-1.08231	2.9286e-05
Zfp229	-1.43035	0.000182978		Bbox1	-1.53997	2.9286e-05
Acer2	-1.46934	0.000183534		Lef1	1.41618	2.9286e-05
Lrrc6	-1.04474	0.000184959		Lig1	1.03934	2.9286e-05
E330013P08Rik	-1.14266	0.000185682		Hes1	1.21234	2.99939e-05
Jup	1.15374	0.000187283		Brca1	1.45166	3.01431e-05
Pcnt	1.04772	0.000190189		Cldn10	-1.01079	3.01663e-05
Znhit3	-1.35268	0.000190712		Klrd1	1.38769	3.02489e-05
Sema4f	1.09835	0.000193776		Vnn1	1.40082	3.05666e-05
Ccnt1	-1.0176	0.000199316		Ncln	1.17938	3.0632e-05
Olfr1362	-1.46408	0.000206315		Aldh7a1	1.15636	3.0632e-05
Slc25a16	-1.16596	0.000206839		Itgax	1.01341	3.0632e-05
Pnpla2	1.02142	0.000208223		Niacr1	1.42237	3.06388e-05
Slfn2	1.18793	0.000208767		Plau	1.72382	3.07208e-05
Yod1	-1.2899	0.000210183		Gm4759	2.02637	3.09629e-05
Slfn4	2.17778	0.000212432		Scn1a	-1.18675	3.10525e-05
2610203C20Rik	-1.09372	0.00021711		Taf6l	1.19576	3.12055e-05
Acacb	1.11936	0.000218035		Aim1	1.14256	3.14896e-05
Iigp1	2.90641	0.000224143		Ska1	1.61499	3.14958e-05
Irgm1	1.81987	0.000224739		Dtl	1.87137	3.15327e-05
2900053A13Rik	-1.09372	0.00022681		Spag5	1.34826	3.15588e-05
Fibp	1.25989	0.000226866		Spsb1	1.29823	3.15788e-05
Skiv2l	1.03987	0.000227365		Unc79	-1.37296	3.15788e-05
Slc6a6	1.03464	0.000227365		Bgn	1.12341	3.15807e-05
Fundc2	-1.15825	0.000230316		Shq1	1.14825	3.18207e-05
Scrn2	1.44937	0.000230392		Mettl7a1	-1.30269	3.18207e-05
Ppp1r12b	1.17255	0.000232166		Tnfrsf11a	1.26792	3.18711e-05
Ptprm	-1.05732	0.000237228		Klk1b8	1.25268	3.18711e-05
Timp1	1.37602	0.000237553		Zmynd15	1.46023	3.18711e-05
Npr3	-1.8063	0.000237893		Spp1	1.18155	3.18711e-05
Sh2d1b1	-1.17513	0.000238718		Ncoa3	1.02646	3.22446e-05
Ripply3	-1.19293	0.000239175		Thbs1	1.53722	3.27961e-05
Synpo2l	1.94104	0.000240124		Coro7	1.03616	3.27961e-05
Pacsin1	1.12316	0.000240142		Ghsr	1.03817	3.28017e-05
Mest	-1.04166	0.000240247		Tff2	-3.63195	3.28017e-05
Ifih1	1.31205	0.000242566		Cks2	1.13103	3.29284e-05
Rgs18	-1.12718	0.00024499		Tceal1	-1.13016	3.31191e-05
Pkia	-1.12258	0.00024681		Abcd2	-1.11156	3.32143e-05
Ccnjl	-1.22915	0.000252105		S1pr5	1.13044	3.33793e-05
Edil3	-1.90416	0.000256129		Fmnl1	1.08283	3.3658e-05
Calcrl	-1.23128	0.000256487		Mcoln2	1.77433	3.3658e-05
Aldh2	1.16242	0.000260119		2210415F13Rik	2.59242	3.37715e-05
2310068C19Rik	-1.09772	0.000261649		Gngt2	1.11487	3.39597e-05
Fnbp1	1.12534	0.000265128		Fst	1.15384	3.39597e-05
Col7a1	1.10992	0.0002684		D10Bwg1379e	-1.2754	3.41305e-05
Hist1h2al	-1.35993	0.000270792		Pask	1.58199	3.41305e-05
Irgm2	2.37885	0.000272207		Bhlhe40	1.22522	3.41305e-05
Mll2	1.02574	0.000272723		9230104L09Rik	-1.23036	3.41305e-05
H2-T24	1.11347	0.000273247		Rmrp	-1.126	3.42065e-05
Rph3a	2.334	0.000274826		Tnfsf9	1.06457	3.42065e-05
E030010A14Rik	-1.28959	0.000276948		Gpr113	-1.42311	3.45098e-05
BC013712	1.00462	0.000276956		Clca1	1.65359	3.45098e-05
Meox1	-1.1205	0.000277734		Ptx3	2.16112	3.45187e-05
Gm16381	-1.36108	0.000278588		Ung	1.36628	3.45187e-05
Tnxb	1.52595	0.000282898		D130020G16Rik	-1.21664	3.46345e-05
Herc6	1.47453	0.000289355		Sbsn	-1.8605	3.46558e-05
Pou3f1	2.14558	0.000290617		Adam5	-1.46119	3.49822e-05
AK129341	-1.10222	0.000291528		Mctp2	1.27294	3.52831e-05
Cpt1b	1.94225	0.000295458		C1qb	1.48448	3.54418e-05
Zfp628	1.41878	0.000296016		Gpx8	-1.01138	3.56453e-05
Ttyh3	1.17327	0.00029775		Galnt6	1.36595	3.59188e-05
2610007B07Rik	-1.23536	0.000300147		Acbd7	-1.4547	3.59188e-05
Zfp947	-1.28156	0.00030364		Ptpn22	1.27096	3.59188e-05
Zdhhc15	-1.05983	0.00030423		Ccnb1	1.55161	3.59188e-05
2310022A10Rik	1.07279	0.000306128		9530006C21Rik	-1.20942	3.61357e-05
Obscn	3.32946	0.000306199		Wfdc1	-1.10876	3.63014e-05
Ccdc9	1.41165	0.000315122		S1pr4	1.89177	3.66304e-05
Adamts12	-1.03607	0.000316357		Foxl2	1.19068	3.66385e-05
Pdk2	1.35732	0.000320718		BC005764	1.12746	3.67599e-05
Asprv1	-3.52207	0.000323979		Gpr116	-1.05303	3.67599e-05
Zfp939	-1.0903	0.000324715		Gzma	1.48599	3.67851e-05
Zfp503	1.23875	0.000328579		Bcl2a1b	1.0782	3.67851e-05
Apol9b	2.28618	0.000328699		Ipo7	-1.0725	3.69748e-05
1110032A04Rik	-1.54368	0.000328699		Gstm5	-1.49804	3.7303e-05
Ntf3	-1.1716	0.000328699		Clec4d	1.26383	3.77335e-05
Vmn2r29	1.53224	0.000328775		Lgals7	-3.36519	3.77488e-05
Hsdl2	-1.0104	0.000330098		Acin1	-1.1234	3.77653e-05
Ifi203	1.18782	0.000344828		Plec	1.61009	3.78476e-05
Spink4	-1.04112	0.0003456		Tmem35	-1.12972	3.80919e-05
Rgs16	1.05003	0.000349496		Grina	1.16833	3.80971e-05
Pex5l	1.22252	0.000351437		Trim25	1.09029	3.81321e-05
Col11a2	1.04667	0.000357509		Naa25	1.4064	3.82274e-05
Igtp	2.48653	0.000358259		Hist1h2ak	1.45978	3.82306e-05
Sntg2	-1.00332	0.000359118		Pm20d1	-1.04398	3.82566e-05
Fabp5	-1.18305	0.000359669		Nphp4	1.2099	3.83966e-05
4930485B16Rik	1.25471	0.000361044		Gfi1	1.23795	3.87003e-05
Spry4	-1.13173	0.000362112		Emr4	1.18891	3.89655e-05
5830474E16Rik	-1.05413	0.00036654		Git1	1.06176	3.89655e-05
Ear6	-1.05117	0.000378741		Nckap1l	1.02083	3.89655e-05
Hes5	1.02487	0.000380857		Cap1	1.32385	3.90013e-05
8430437N05Rik	2.08284	0.000383944		Evi2a	1.51746	3.92387e-05
Gpc1	1.30938	0.000383955		Cybb	1.25366	3.92387e-05
C230081A13Rik	1.059	0.00039158		Sap30	1.39389	3.94125e-05
Prrt1	-1.10589	0.000392724		Arl5c	1.35618	3.94125e-05
Txk	1.01144	0.00040757		Ece2	1.14219	3.94125e-05
Rif1	1.35592	0.000409933		Espl1	1.95746	3.94262e-05
Ccdc117	-1.24876	0.000412085		Fam49b	1.00013	3.94262e-05
Foxg1	1.52185	0.00041357		Gm5483	2.48407	3.96696e-05
Ciita	1.51132	0.000414331		Ccrl2	1.18555	4.01388e-05
Sectm1b	1.1607	0.000420528		A130082J08Rik	-1.09017	4.02705e-05
Cd274	2.17259	0.000427785		Lalba	2.56295	4.05712e-05
Cxcl9	2.64555	0.000439556		Tlr7	1.61942	4.07899e-05
Sbsn	-1.41804	0.000444205		Cant1	1.11873	4.09766e-05
Pllp	-1.20803	0.000447338		Myo1g	1.42346	4.10384e-05
Bcl11a	1.03733	0.000449906		6820402A03Rik	-1.18544	4.1167e-05
Rexo4	1.0665	0.000450512		2010003D24Rik	-1.10341	4.1167e-05
Retnla	1.1969	0.000459841		Gm1966	1.62911	4.13811e-05
Hsh2d	1.3657	0.00046392		Ptgir	1.01018	4.13811e-05
Gnao1	1.69228	0.000469301		Gpr98	-1.16641	4.13848e-05
Agrn	1.39318	0.000474958		Cxcr3	1.57062	4.15272e-05
Gm14446	1.46401	0.000475845		Rbm47	1.03423	4.21363e-05
Myh4	2.73111	0.000481114		Nmral1	1.18027	4.21707e-05
Sult1c2	-1.25207	0.000482573		Apol7a	2.37131	4.21815e-05
Gvin1	1.30541	0.000485003		Fgd3	1.02881	4.2301e-05
Has1	1.54545	0.000485113		Csf3r	1.63998	4.26365e-05
Bhlhe41	1.19078	0.000494986		Rbmxl2	-1.39005	4.2737e-05
Cd209d	-1.14841	0.000506301		Galntl2	-1.04077	4.27747e-05
Gm12250	2.81463	0.00050822		Clca2	1.65197	4.29173e-05
Lars2	1.62929	0.000509183		AI662270	1.26983	4.29173e-05
Fbxo31	1.23154	0.000521674		Tmem64	-1.02061	4.35345e-05
Chi3l4	-2.06621	0.000526729		Lpxn	1.57122	4.37661e-05
Ctif	1.06602	0.000538483		AF251705	1.20748	4.4222e-05
2610019F03Rik	-1.00108	0.000566156		Ass1	1.36403	4.4222e-05
Ifi30	1.01958	0.000569492		Klra23	1.56081	4.4222e-05
Fbrsl1	1.02792	0.000574479		Nfic	1.00198	4.46487e-05
Gmpr	1.00831	0.000587726		Cyp2c44	-1.19657	4.46956e-05
Dmbt1	-1.62687	0.000610916		4930503L19Rik	-1.00706	4.53295e-05
4933406C10Rik	1.17733	0.000614153		9430079G20Rik	-1.01024	4.58024e-05
Zc3h6	1.19446	0.000626157		Slc23a3	1.03921	4.63191e-05
Rab11fip5	1.11085	0.000627116		Blnk	1.59393	4.65704e-05
Kcna2	1.05645	0.000627876		Slc27a4	1.01149	4.6759e-05
2210409E12Rik	-1.09817	0.000633753		H2-T22	1.9672	4.68863e-05
Hamp	-1.70486	0.000641807		Eno1	1.55696	4.71366e-05
Apol7a	2.27014	0.000657212		Ppp1r3c	-1.3223	4.72345e-05
Cd300lf	1.00448	0.000661596		Serpine1	1.57917	4.72923e-05
Ighv14-2	1.63682	0.000673653		Pglyrp2	1.7897	4.7472e-05
2900052N01Rik	1.14987	0.000677353		Col4a2	1.59261	4.74941e-05
Tnfrsf14	1.03944	0.000694936		Gm5547	1.78446	4.76151e-05
Gys1	1.6066	0.000697402		Hk3	1.60542	4.76898e-05
Gm5431	1.19372	0.000699222		Dbn1	1.05138	4.77752e-05
Aldh1a3	1.09043	0.000707876		Bub1b	1.25547	4.78447e-05
Gm5168	-1.07569	0.000711704		Sntn	-1.52964	4.78962e-05
Ccng1	-1.02046	0.000722044		Errfi1	-1.07921	4.79491e-05
Slc20a2	1.15275	0.000739061		Cacnb2	-1.0092	4.79491e-05
Cyr61	1.17599	0.000743167		Itgb7	1.54706	4.79491e-05
Gm8995	1.06538	0.000744626		Pigs	1.15095	4.80374e-05
Ltn1	-1.12044	0.000751589		Akna	1.01409	4.81339e-05
Tgtp1	2.06214	0.000762156		A430071A18Rik	-1.56807	4.82655e-05
Sytl3	1.25153	0.000775792		Tgm5	1.41378	4.83641e-05
Nlrc5	2.36263	0.000789051		Prtn3	1.27688	4.8484e-05
Fhl3	1.22186	0.000789667		Mnda	1.89702	4.86071e-05
BC024137	-1.01534	0.000797367		Sh2d1a	1.99437	4.87357e-05
AI504432	-1.08371	0.000803626		Ercc6l	1.63742	4.92641e-05
Ovol1	-1.52552	0.000809826		Klrc1	1.62607	4.92641e-05
Mchr1	1.09984	0.000812718		Chad	-1.51728	4.94048e-05
Gm1966	1.10509	0.00081645		Ric3	-1.02462	5.01401e-05
Fam110a	1.19249	0.000817271		Foxm1	1.25288	5.01763e-05
Ifi27l2b	1.5478	0.000829684		Phf19	1.03647	5.07829e-05
Mnda	1.18641	0.000840385		Mrgprg	1.00235	5.08181e-05
Msln	1.11444	0.000840578		Raver1	1.53528	5.12877e-05
Dnajb4	-1.0638	0.000842857		Pcnxl3	1.08914	5.12902e-05
A530032D15Rik	1.25756	0.000843968		Nog	2.11218	5.14414e-05
Hpdl	1.42329	0.000844646		1110032A04Rik	-1.54706	5.16797e-05
Mterfd1	-1.07541	0.000845423		Bmpr1b	-1.20766	5.20407e-05
Bpifa5	-1.19101	0.000849978		Smarcd1	1.02542	5.20645e-05
Il1f8	-1.0769	0.000851405		Perp	-1.60592	5.20932e-05
Psapl1	-1.85638	0.000854408		Gm5101	-1.27059	5.24886e-05
D830024N08Rik	1.00786	0.000855638		Gli2	1.35562	5.25234e-05
Ms4a6c	1.16581	0.000859995		Chl1	1.07694	5.25435e-05
Plac8	1.10512	0.000866565		Braf	-1.04984	5.25946e-05
1810058I24Rik	1.03027	0.000886694		Il18rap	1.52972	5.30159e-05
Mkl1	1.13732	0.000893615		Sult1c2	-2.1386	5.34826e-05
Cpeb2	-1.03095	0.000917849		5730416F02Rik	1.33369	5.34826e-05
Eppk1	1.09189	0.000933281		Cyfip2	1.11101	5.35872e-05
Drd3	2.0708	0.000936517		Aknad1	-1.19797	5.35872e-05
1500002F19Rik	-1.26299	0.000985892		Dmkn	-1.02187	5.36571e-05
Tfam	1.63945	0.000986758		Plscr4	-1.0655	5.36833e-05
Gbp6	2.16844	0.000999808		Cox10	1.24265	5.40034e-05
Igj	-1.35212	0.00101707		Trim3	-1.09853	5.40321e-05
Gbp1	1.91384	0.0010197		Lrrc4	1.1583	5.4772e-05
Mlkl	1.11471	0.00103104		Cd5l	2.69488	5.49048e-05
Hhatl	1.44243	0.00103389		Srsf9	1.19014	5.52407e-05
Mmp28	-1.31621	0.00103483		B430316J06Rik	-1.18442	5.52407e-05
Asb2	1.48318	0.00106916		Ppil6	-1.30304	5.55063e-05
Utp14a	1.04592	0.00107594		Mitd1	1.47989	5.56087e-05
Myom2	1.6833	0.00107884		0610007P08Rik	-1.04088	5.62432e-05
AA438147	-1.51338	0.00109037		Myo1d	1.06862	5.6918e-05
Osbp2	1.00875	0.00110589		Tmem40	-1.03995	5.70077e-05
C730049O14Rik	-1.02124	0.00112476		Ccng1	-1.40827	5.72732e-05
Usp50	1.07232	0.00113232		Dcst2	-1.0613	5.74379e-05
Ddx46	1.24745	0.00114097		Cytl1	-1.00211	5.78066e-05
Scrg1	-1.28681	0.00117047		Lypd3	-2.97754	5.80029e-05
Trim6	1.30435	0.00119763		A730009E18Rik	-1.19848	5.83628e-05
Idh2	1.0313	0.00121168		Iffo2	1.01582	5.83628e-05
Olfr1153	1.42259	0.00122628		Gpr162	1.19287	5.83655e-05
Reg3g	-1.34234	0.00124318		Akr1b7	-1.46686	5.85537e-05
2310002J15Rik	-2.57506	0.0012745		C1qtnf3	-1.92573	5.86053e-05
Smcr7	1.06553	0.0013193		Spib	1.48775	5.90954e-05
Dnaja1	-1.48497	0.00132966		Ect2	1.18805	5.93544e-05
Olfr693	1.13064	0.00133194		Pigy	-1.24437	5.93964e-05
Gm8300	-1.13083	0.00133925		LOC639910	1.35548	5.942e-05
Gbp7	1.59639	0.00134338		Ly86	1.11067	5.98256e-05
Fbxo32	1.22858	0.00138594		Irf1	1.15657	6.04052e-05
9330175E14Rik	1.54625	0.00141402		H2-M3	1.47103	6.08939e-05
Ada	-2.4712	0.00143492		Smpd3	1.46131	6.10184e-05
Spon2	-1.15362	0.00145182		Cpxm1	1.2235	6.14744e-05
Echdc1	-1.02358	0.00146085		C1qa	1.31897	6.16825e-05
Cby1	-1.03491	0.00148878		P2ry13	1.30559	6.2412e-05
Acta2	1.82545	0.00148947		Cd248	1.14998	6.24967e-05
Fam26f	1.84494	0.00150623		N28178	-1.10091	6.25819e-05
Atp1a2	1.5797	0.00150919		Txk	1.63409	6.31325e-05
Ssb	-1.03275	0.00155819		Olfr414	-1.5099	6.3271e-05
Myh6	2.46732	0.00160325		Hmmr	1.27406	6.34386e-05
Hand2	1.53307	0.00163657		Aspn	-1.99131	6.37877e-05
BC100530	-2.87023	0.00166343		Padi2	1.21943	6.47557e-05
Hrc	1.56171	0.0016706		Lat	1.27596	6.51131e-05
Plin5	1.40096	0.0016715		Sult1a1	-1.04754	6.60427e-05
C1rl	1.59528	0.00168111		Gbp8	2.34273	6.62699e-05
Ifng	2.58888	0.0016929		Hist1h2ao	1.2427	6.64218e-05
Tnfrsf12a	-1.05947	0.0016932		Slc16a10	1.09896	6.65171e-05
Slc22a1	-1.19284	0.00173735		Lrrc26	-1.29654	6.66707e-05
Usp13	1.61647	0.00179849		Chia	-1.75781	6.68933e-05
Serpinb12	-3.54613	0.00182176		Atp9a	1.20226	6.70437e-05
Gm7120	-1.00117	0.00185949		Nrn1	-1.25285	6.70437e-05
Slc2a4	1.35197	0.00187057		AK129341	-1.09857	6.70437e-05
Gm106	-1.30973	0.00190016		Bcl11a	1.60799	6.75417e-05
Itln1	-1.06099	0.00191613		1700012B09Rik	-1.13564	6.77372e-05
Adck3	1.71203	0.00192393		H2-Ab1	1.02067	6.84135e-05
Kat2a	1.16012	0.00201743		Mastl	1.32774	6.84135e-05
Pde4dip	1.82547	0.00206278		Naglu	1.07736	6.89346e-05
4921509J17Rik	-1.04039	0.0020723		Copg2as2	-1.15923	6.91054e-05
1700021J08Rik	1.00967	0.00209569		Ifi30	1.62038	7.01269e-05
Cpa3	-1.28614	0.00213113		Apbb1ip	1.13685	7.02301e-05
Cfb	1.00897	0.00213957		Slc15a2	-1.2262	7.02384e-05
Cdkn2d	1.20656	0.00215595		Dnaja4	-1.26941	7.02567e-05
Rtp3	1.16404	0.00217348		Faim3	1.54878	7.07143e-05
Ralgds	1.25032	0.00217562		C1qc	1.09629	7.07143e-05
Gchfr	-1.09195	0.00217675		Tssc1	1.04266	7.07837e-05
Syn1	1.34558	0.00219521		Klra3	1.3148	7.09908e-05
Serpinb3c	-1.92634	0.00229946		6720473M08Rik	-1.07346	7.10197e-05
Batf2	1.82875	0.00229992		H2-DMb2	1.65261	7.10309e-05
Gbp2	1.40026	0.00237599		4631423B10Rik	-1.01917	7.10309e-05
Kcnh6	1.23499	0.00251472		Cdc42bpg	-1.30637	7.12576e-05
Gm11149	1.0293	0.00251589		Csf2ra	1.23507	7.13595e-05
Me3	1.17559	0.00252347		Olfr434	-1.42536	7.19102e-05
Tbx1	1.04087	0.00262692		Kcnab2	1.05121	7.21297e-05
Actn2	1.64821	0.00263576		Gpr88	1.32893	7.23494e-05
Il18bp	1.18001	0.00264976		Foxp2	-1.06045	7.31304e-05
Fabp7	-1.30664	0.00271147		Itk	1.45877	7.35248e-05
Eef1a2	2.02105	0.00276945		Retnlg	1.29371	7.45693e-05
Got1	1.24223	0.00277508		Nlrc5	2.02811	7.51295e-05
Perp	-1.02833	0.00287275		2310067E19Rik	-1.15578	7.57126e-05
Fanca	1.05492	0.00293845		D430004P15Rik	-1.09264	7.57126e-05
Krtdap	-5.77899	0.00301785		Arrb2	1.16208	7.57956e-05
Irf1	1.08298	0.00322226		B230337E12Rik	-1.0495	7.73631e-05
Gbp9	1.23848	0.00334618		Ncaph	1.08298	7.80003e-05
Disp2	-1.29913	0.0033469		Areg	2.11562	7.80116e-05
Csta	-2.34713	0.00334708		Srp68	1.12109	7.81992e-05
Cand2	1.01347	0.00338632		Pax9	-1.1808	7.85473e-05
Dusp8	1.22779	0.00339972		Olfr1153	1.22885	7.95293e-05
Otop3	-1.80452	0.00352263		Tubb6	1.20245	7.95293e-05
Neurl1a	1.36666	0.00355931		Cd6	1.80644	7.97574e-05
Slfn1	1.27968	0.00361022		Ms4a4b	1.61759	8.01215e-05
Lce1i	-2.75508	0.00361461		Cd209f	-1.14418	8.0909e-05
Cox6a2	1.10844	0.00367543		Sytl3	1.73215	8.09488e-05
Hspb6	2.4211	0.00368558		Il4i1	1.68594	8.12728e-05
Myh2	3.19905	0.00384039		Plod1	1.34669	8.13523e-05
Gsdma	-2.80159	0.00390593		Rab20	1.10838	8.13633e-05
Mtap2	-1.21676	0.00393805		Ptk2b	1.05808	8.16678e-05
Klhl30	1.33413	0.0040527		Bid	1.12212	8.19905e-05
2310043M15Rik	-1.42718	0.00415477		Trim29	-1.50935	8.22113e-05
Trim29	-1.72116	0.00416892		Atp10a	1.09207	8.23012e-05
Pinx1	1.0316	0.00417495		Klrc3	1.83892	8.25994e-05
Myom3	2.03487	0.00444727		Ptprc	1.11503	8.25994e-05
Serpinb5	-2.69831	0.00452903		Cst8	-1.41457	8.29502e-05
Gdf2	1.13366	0.0045347		Ankrd50	-1.0812	8.29502e-05
Lce3c	-5.34056	0.00455617		Nfkbie	1.86639	8.33564e-05
Il20ra	-1.17792	0.00475472		Efcab1	-1.02705	8.61158e-05
Trim54	1.6792	0.00483175		Jup	1.42219	8.64411e-05
Fetub	-1.10722	0.0049535		Slamf9	1.30726	8.64757e-05
Myh8	1.87121	0.0050642		Abcd1	1.41489	8.64917e-05
Tmem138	-1.30042	0.00524178		Clec4g	-1.36409	8.64917e-05
Capns1	1.15792	0.00524758		Gbp4	2.06945	8.6584e-05
Jph2	1.03605	0.00544049		Spc25	1.04789	8.66785e-05
Pygm	1.8737	0.00555665		D0H4S114	-1.13849	8.71528e-05
Klf17	1.09174	0.00565801		Rab32	1.0088	8.768e-05
Art5	1.40752	0.00600478		Expi	1.40858	8.81062e-05
Stfa1	-2.41826	0.006232		Ptprr	-1.62348	8.8691e-05
Rapsn	1.09855	0.00629035		4930455J16Rik	-1.00704	9.04369e-05
Tgm3	-1.76494	0.00637901		Ipcef1	1.22135	9.05432e-05
Hspb7	1.36793	0.00646276		Atp1a1	1.05928	9.17841e-05
Scn5a	1.18069	0.00680964		Bpifb1	-1.83389	9.2162e-05
Ifi47	1.14559	0.00697209		Parm1	1.00257	9.21754e-05
Mt4	-4.04384	0.00720366		Dnase1l3	2.22275	9.2551e-05
Fthl17	1.51512	0.00757918		Bcl2a1c	1.05607	9.34027e-05
Saa3	1.32869	0.00765087		Ankrd33b	-1.30755	9.35795e-05
Cst6	-1.10568	0.00771543		6330403K07Rik	-1.12726	9.39497e-05
Pgm1	-1.06616	0.00788123		Lck	1.30612	9.43817e-05
Adssl1	1.17924	0.00792203		Ccr9	1.07658	9.57225e-05
Olfr1280	1.0558	0.0080641		Dynll2	-1.02543	9.63347e-05
Vmn1r192	1.0345	0.0081092		Prkcb	1.2057	9.76706e-05
Nkpd1	-2.51968	0.00820987		Klrb1f	1.1223	9.76942e-05
Ckm	2.00891	0.00833142		Ciita	1.74678	9.85294e-05
Lypd3	-3.44319	0.00837733		8430431K14Rik	-1.03833	9.8744e-05
Bves	1.24069	0.00844181		Wdr69	-1.24151	9.90978e-05
Rnf216	1.17256	0.00855222		Psat1	1.00451	9.9284e-05
Lor	-3.35709	0.00884474		Kcnk2	-1.09444	9.96585e-05
Zc3h3	1.3073	0.00909493		Traip	1.29721	0.000100438
Cnfn	-1.4205	0.00917524		Slc35e1	1.2043	0.000100665
Aloxe3	-1.84348	0.00925392		Trim12a	1.26987	0.000100746
Acta1	1.66824	0.00943895		Gt(ROSA)26Sor	-1.02871	0.00010098
Cyp1a1	-1.44255	0.009544		Gpr83	1.38185	0.000101822
Hspa1a	-1.3917	0.00991296		BC048355	1.13943	0.000103095
Defb3	-1.11769	0.00999458		Gm11545	-1.1058	0.000103204
Ptger1	1.00433	0.0100477		Ly6c1	1.58068	0.00010376
1700067K01Rik	1.0742	0.0104743		Pla1a	2.25847	0.000104228
Atp2a1	2.29309	0.010485		Chac1	1.30773	0.000104545
Art1	1.37541	0.0108737		Gprasp2	-1.03592	0.000105997
Fam25c	-4.48218	0.011126		Pira6	1.52961	0.000106435
Chrna9	-1.91123	0.0114491		Ogfr	1.21072	0.000107437
Duoxa1	-1.67277	0.0118912		Ikzf3	1.38657	0.000107437
Calml3	-2.93222	0.0119995		2022-03-01	1.252	0.000107572
Vmn1r195	1.04105	0.0120585		Nampt	1.02691	0.0001082
Fzd9	2.05242	0.0123172		Orm2	1.70563	0.000108461
Rapgefl1	-1.48217	0.0124122		Dennd1c	1.23523	0.000108583
Fam107a	-1.07735	0.0133774		Tapbpl	1.05337	0.000109689
Xlr3c	-1.43608	0.0136214		Zfp583	-1.08757	0.000109774
Nrap	1.42472	0.0137642		Gm4724	-1.01643	0.000110243
Krt6b	-2.7513	0.0141664		5031425E22Rik	-1.17984	0.000110243
Xirp1	1.13476	0.0142171		LOC100502965	-1.06551	0.000113641
Acsbg1	-1.73961	0.0142214		Gm9975	1.13056	0.000114166
Synpo2	1.39641	0.0143977		Micalcl	-1.16906	0.000114239
Camk2b	1.01857	0.0144819		1110067D22Rik	-1.0402	0.000114944
B3galt2	-1.13213	0.0146476		6330512M04Rik	1.16786	0.000115082
Fgg	1.10309	0.015137		Aass	-1.05586	0.000115122
Pfkm	1.20812	0.0154559		Gnaz	1.10385	0.000115898
Ly6d	-1.29135	0.0155293		Atp8b4	1.37637	0.000117962
Casq1	1.67489	0.0158104		Tmem185b	1.01175	0.000117962
Tcap	1.08156	0.0163026		Elavl2	-1.21899	0.000118275
Olfr312	1.03202	0.0164024		Hspg2	1.02235	0.000118362
Flnc	1.2373	0.0167627		D7Ertd443e	-1.1713	0.000118438
Ctxn3	-1.50946	0.0173019		Cd37	1.36801	0.00011861
Prom2	-1.22499	0.0174965		9330162012Rik	-1.1022	0.000118872
Hsph1	-1.13251	0.0185019		Capg	1.12088	0.000119005
Lgals7	-3.00065	0.019425		Dscc1	1.43827	0.000119005
Myh1	2.10816	0.0195982		Sell	1.43377	0.000119569
Trp63	-1.89333	0.0199742		Car12	-1.63343	0.000120031
Col22a1	1.37864	0.0200074		Colec10	-1.77651	0.000120945
2310042D19Rik	1.2921	0.0202089		Cd8b1	1.4351	0.000122259
Krt4	-2.96986	0.02119		Wdr74	1.01175	0.000123042
Ckmt2	1.3075	0.0214491		Serpinb5	-2.19402	0.000123792
LOC100504416	1.07022	0.0216804		Rrad	1.50933	0.000123792
Shisa4	1.08158	0.0228024		Ttyh3	1.2709	0.000124037
Kcng2	1.36741	0.0236003		Prh1	1.02593	0.000124876
Slc38a3	1.01972	0.0259678		Tlr1	1.68846	0.000126061
Mnd1	-1.42293	0.0262167		Psmb2	1.11668	0.000126335
Mybphl	1.19872	0.0264351		Negr1	-1.08663	0.000126423
Gbp8	1.08506	0.026503		Vps37c	1.16677	0.000126708
Stac3	1.44559	0.0276779		Il2ra	1.39017	0.000129499
LOC100503495	1.0852	0.0281126		Sepsecs	-1.10873	0.000129499
Actc1	1.24892	0.0282879		Foxo6	1.20156	0.000131382
Gpr173	1.07316	0.0286511		Apol6	1.79423	0.000133842
Preb	1.11568	0.0293341		Hlf	1.01463	0.000134081
Ryr1	1.83924	0.0302684		Fam151a	1.15991	0.000134511
Rbfox1	1.10767	0.0303714		Cenpi	1.28359	0.000134619
Mybpc3	2.07434	0.032552		Susd3	1.00012	0.000135851
Mybpc2	1.42104	0.0325813		BC048546	-1.23656	0.000136986
Vsig4	-1.12654	0.0378882		Pnp	1.3356	0.000138453
Fitm1	1.10332	0.0401256		Gpr171	1.36453	0.000140197
Olfr1255	1.06596	0.0438578		Gm11428	1.3509	0.00014178
Klb	-1.04255	0.0470193		Prc1	1.20248	0.000142602
Cd8a	1.06416	0.0484637		Tmed6	-1.07941	0.000142602
Alpk3	1.20793	0.0485937		Krt4	-2.41177	0.000142603
Krt13	-3.31897	0.049159		Zfp37	-1.09235	0.000143506
				Zap70	1.11132	0.000143975
				Omd	-1.77089	0.000144856
				Bnip3	-1.02452	0.000146704
				Cd79a	1.04487	0.000147103
				Cpb1	-1.10651	0.000147528
				Ptprg	-1.28126	0.000149383
				Havcr2	1.78512	0.000150937
				Me1	-1.40353	0.000151152
				Ncr1	1.19912	0.000152484
				D7Ertd715e	-1.07855	0.000154226
				Gpr119	-1.30866	0.000155903
				Bex2	-1.25115	0.000157797
				2022-09-01	1.02014	0.00015801
				Chrna9	-2.45972	0.00015801
				B930041F14Rik	1.09006	0.000162368
				Qpct	-1.18861	0.000162587
				Cd300e	1.80539	0.000162594
				Tex15	-1.25823	0.000164034
				Hmcn1	-1.24816	0.000166289
				Nt5dc2	1.37388	0.00016639
				Fam13c	1.53297	0.000166557
				Ppbp	-1.1248	0.000167878
				Dtx1	1.80448	0.00016821
				Abca17	-1.01914	0.00016825
				Emr1	1.03281	0.000168552
				Naip2	1.30843	0.000168863
				Krtdap	-3.73671	0.000169278
				Crtam	1.21769	0.000170094
				Nfkbid	1.0774	0.00017421
				Sh3bp2	1.30137	0.000175533
				Fam65b	1.14298	0.000176096
				Pltp	1.00631	0.000176303
				Npr3	-1.66198	0.000176525
				Gtpbp10	-1.01406	0.00017783
				Rnase6	1.5257	0.000178439
				Zfp292	-1.05737	0.000179834
				Baiap2l2	-1.12219	0.000181886
				Lrmp	1.04562	0.000184619
				Pkia	-1.2785	0.000184798
				Acta2	1.13362	0.000186795
				Hebp2	-1.01703	0.000187202
				Defb3	-1.80398	0.000187202
				Mum1l1	-1.26662	0.000187956
				H1fx	-1.04231	0.000188875
				D230034L24Rik	-1.05435	0.000192183
				Itga2b	1.53153	0.000193925
				Prss53	-1.21296	0.000195072
				Pbk	1.40916	0.000197793
				Aldh1a1	-1.05161	0.000197813
				Serpina3g	1.87859	0.000200382
				Pnliprp1	-1.07474	0.000200949
				Trim55	1.53037	0.000204964
				4933426M11Rik	1.27802	0.000204964
				Ddx25	1.36636	0.000205913
				Impa2	1.06627	0.000207505
				2410124H12Rik	-1.11028	0.000208327
				5430407P10Rik	-1.01982	0.00021037
				Ephb2	1.11658	0.000211231
				Cxcl13	1.5516	0.000211555
				Pcp4l1	-1.20643	0.000213289
				Rad54b	1.1174	0.000213289
				E2f7	1.21523	0.000215605
				Ccnjl	-1.39484	0.000216553
				Vmn2r29	1.10838	0.000216629
				Casp4	1.3675	0.000218976
				Agrn	1.42881	0.000222089
				Lce1i	-2.95057	0.000223417
				Wars	1.23686	0.000226872
				Sp5	1.04079	0.000229969
				Ces2e	-1.50025	0.000232485
				Kat2a	1.06856	0.000232941
				Hmgcs2	-1.54184	0.000232941
				Fabp1	-1.29427	0.000235537
				Acnat1	-1.46768	0.000236716
				Cx3cr1	1.25794	0.000239149
				Csf2rb2	1.94573	0.000243476
				Gm8579	1.52842	0.000244166
				Klra7	1.64068	0.000244455
				Ripply3	-1.04892	0.000245315
				Rnase1	-1.23351	0.000245671
				S100a9	1.56773	0.000246036
				C230035I16Rik	-1.2408	0.000246134
				9530010C24Rik	-1.09255	0.000247862
				Crb2	1.17014	0.00024896
				Gpr18	1.59782	0.000251039
				Cd52	1.11909	0.000251714
				Ctsz	1.17157	0.000252498
				Tead2	-1.02731	0.0002551
				Serpinb12	-3.42368	0.000255687
				Jakmip1	1.18316	0.000256537
				8430408G22Rik	-1.10758	0.000256641
				Car9	1.132	0.000257511
				Cttnbp2	-1.00961	0.000258505
				Dus4l	-1.54639	0.000260269
				Egr1	2.06439	0.000266971
				2310043J07Rik	2.08822	0.000267079
				Slc22a1	-1.85864	0.000271301
				Cd22	1.45456	0.000274457
				Klrg1	1.23466	0.000275419
				Serpinb3c	-2.50523	0.000278233
				Upb1	1.14803	0.000279284
				Casc5	1.15586	0.000290158
				Retn	-1.71484	0.000292147
				Fam154b	-1.02374	0.000297901
				Cysltr2	1.07478	0.000300281
				Actg2	1.11143	0.000301027
				Cd3g	1.1653	0.000301834
				2700099C18Rik	1.09348	0.000307222
				4921509J17Rik	-1.56569	0.00030942
				Zfp708	-1.06765	0.00031462
				Rasal3	1.12768	0.000315066
				Cd207	-1.70357	0.000317876
				Rhoh	1.03301	0.000320857
				Gm5148	-1.03602	0.000321011
				A430093F15Rik	1.0862	0.000321773
				Hes5	1.17681	0.000324113
				Nusap1	1.02946	0.00032585
				Lce3c	-3.88405	0.000333576
				Cst6	-1.5777	0.000336775
				Gpnmb	1.27671	0.000337559
				Cd44	1.10603	0.000340033
				Ugp2	-1.08414	0.000342999
				Shb	1.13741	0.000345034
				Bmx	-1.17207	0.000351289
				Foxred2	1.17022	0.000354275
				Cd209b	-1.3645	0.000366955
				C530028O21Rik	1.56517	0.000376502
				Pik3c2g	-1.09135	0.000378041
				Fcho1	1.02794	0.000380462
				Fetub	-1.39152	0.000381454
				Zfpm1	1.52187	0.000382551
				Omg	-1.27141	0.000384341
				Stag3	1.25209	0.000385352
				Rbp7	-1.38896	0.000385779
				1810010H24Rik	-1.03672	0.000386661
				5830416P10Rik	1.01191	0.000392377
				Mchr1	1.25101	0.000394457
				Tmem140	1.04735	0.000396203
				Il1f8	-1.24214	0.000402792
				Ubd	3.11291	0.00040833
				Asprv1	-2.04082	0.00041142
				Tnc	1.28335	0.000412155
				Rbm42	1.12385	0.000415039
				Ankle1	1.72436	0.000415849
				Gchfr	-1.17549	0.000427117
				Pcdh9	-1.32632	0.000427407
				Aqp2	-1.06328	0.000430174
				Pla2g2c	-1.03467	0.000435414
				Syn1	1.81249	0.000437063
				Gda	1.04107	0.000443199
				1500002F19Rik	-1.38824	0.000443921
				2810055G20Rik	-1.00137	0.000449421
				Hamp	-2.09887	0.000451028
				AW112010	1.25458	0.000452013
				Lat2	1.22325	0.000453447
				Snhg11	-1.02688	0.000455496
				Cpa3	-1.45162	0.00045967
				Trim6	1.39144	0.000461545
				Upk2	-1.09167	0.000468481
				Hilpda	-1.03484	0.000468704
				Mkl1	1.26156	0.000468811
				Scml4	1.1989	0.000471076
				Rbm38	1.01105	0.000483926
				Mesp1	-1.15687	0.000487494
				Dnajb4	-1.16255	0.000488914
				Ctxn3	-2.26043	0.000493419
				2310002J15Rik	-2.23602	0.000495025
				Adra1b	1.02151	0.000497658
				Hand2	1.82816	0.000504776
				Fam54a	1.15316	0.000510019
				Srm	1.01771	0.000510019
				S100a8	1.41881	0.000516813
				Pcnxl2	1.06792	0.000518232
				Kcne3	-1.07482	0.000547033
				Slc7a3	1.06115	0.000549328
				Esco2	1.25941	0.000551954
				Fundc2	-1.10774	0.000570131
				2310015B20Rik	-1.63855	0.000571822
				Lor	-2.76117	0.000577672
				Cdkn2d	1.54923	0.000582728
				Megf10	-1.2912	0.000588645
				Spic	1.26148	0.00059382
				Bpifa5	-1.1509	0.000594897
				Tmem221	1.05376	0.000598121
				Upk3a	-1.0457	0.00060377
				Gabra4	-1.18937	0.00060974
				2610007B07Rik	-1.13971	0.000622254
				Cd69	1.48068	0.000637816
				Clec5a	1.62102	0.000638051
				Fabp5	-1.06781	0.000656964
				Gm106	-1.39969	0.000669832
				Krtap17-1	-1.78038	0.000676378
				Ppp2r3a	-1.14705	0.000679475
				Atg7	1.02648	0.000695676
				Cpxm2	-1.11219	0.000736197
				Krt79	-1.01287	0.00074049
				Aars	1.02341	0.000743791
				Skap1	1.09144	0.00075226
				Ralgps2	1.01539	0.000755313
				Ppp1r1a	-1.01056	0.000764973
				Dbil5	-1.03363	0.000792399
				2310043M15Rik	-1.98807	0.000811936
				Elf2	-1.24944	0.000820464
				Msln	1.05239	0.000846326
				Tnfrsf14	1.38484	0.000874018
				Alox15	1.57593	0.000916135
				Serpina3f	2.26256	0.000934918
				Ppp2r2c	-1.0166	0.000955287
				S100b	-1.03138	0.000962444
				Igh-VJ558	1.49604	0.000978037
				Aard	-1.01616	0.00104202
				Mug2	-1.14444	0.00104618
				Tpd52l1	-1.60547	0.00106516
				Rab37	1.09387	0.00108149
				Angptl4	1.40114	0.00111906
				Cyp1a1	-2.89018	0.00112861
				Fez1	-1.2231	0.00116498
				Fam123c	1.0147	0.00117487
				Cd5	1.03971	0.00117798
				Lgr6	-1.02837	0.00121752
				Ffar2	1.11376	0.00127455
				Ankk1	-1.29836	0.00134943
				Krt5	-1.82736	0.00135676
				Bcl11b	1.02098	0.00135676
				Dck	2.22272	0.00137741
				Zmynd17	-1.04187	0.00138164
				Degs2	-1.26788	0.00139496
				Sln	-1.49023	0.00140193
				Abca5	-1.01116	0.00142522
				Kntc1	1.11481	0.00144145
				Gnao1	1.24542	0.00144447
				Speer4d	1.18953	0.0014725
				9330159F19Rik	-1.1488	0.00153059
				Amy1	-1.06122	0.00153321
				Pole2	1.12332	0.00153694
				A130038J17Rik	-1.21046	0.00158314
				Mmp28	-1.12152	0.00186997
				Calml4	-1.05006	0.0018807
				Cmtm5	-1.08933	0.00199977
				H19	-2.19135	0.00200711
				D630033O11Rik	-1.19416	0.00203521
				Insl6	1.10805	0.00210586
				Mlf1	-1.25633	0.00214726
				Ifna12	1.34623	0.00217243
				Hk2	1.07574	0.00219381
				Dusp8	1.24974	0.00220049
				Ccl19	1.64123	0.00221016
				Orm1	1.17675	0.00224782
				Gm16489	1.10654	0.00227097
				Coro1a	1.15434	0.00234363
				LOC100505002	1.0235	0.00244774
				Capns1	1.35461	0.00248439
				Pklr	-1.06946	0.00253747
				Ighv14-2	1.51246	0.00255819
				2900011G08Rik	-1.29839	0.00259594
				H2-Oa	1.18006	0.00262256
				Usp2	1.01505	0.00270492
				Kmo	1.21737	0.00277086
				Rtp3	1.07906	0.00295256
				Fcrl1	1.05111	0.00315221
				Rna28s1	1.61458	0.00317287
				Il21r	1.18196	0.00318788
				Srcin1	-1.33475	0.00322687
				Igj	-1.4636	0.00339671
				Cyp26b1	-1.16739	0.00399815
				Ralgds	1.09073	0.00401978
				Batf	1.02494	0.00414726
				Prm1	1.85298	0.00420408
				1700018B24Rik	-1.05127	0.00425985
				Mcm2	1.00638	0.00443006
				Tnfrsf13c	1.07733	0.00447427
				5830411N06Rik	1.19842	0.00474377
				Pdcd1	1.10113	0.00499274
				Ada	-1.31054	0.00528941
				Klb	-1.05236	0.00536159
				Itgb1bp2	-1.76572	0.00586124
				Dnajb8	-1.7972	0.00592395
				Tas2r140	-1.11619	0.00610956
				Elovl6	-1.22724	0.00628257
				Rhox5	-1.27641	0.00640321
				Ptger1	1.15272	0.00654261
				C1rl	1.22906	0.00715376
				Kif12	-1.42079	0.00722098
				Thrsp	-1.96179	0.00723821
				Csrp3	-1.69944	0.0074115
				Psapl1	-1.00481	0.00762716
				Il1r2	1.09625	0.00777017
				Ddit4l	-1.5051	0.00778348
				Ccr7	1.18705	0.00782775
				Eml6	-1.38721	0.00866643
				Asb5	-1.67552	0.00885528
				Mapk10	-1.28977	0.00894368
				Tomm40	2.44673	0.00934029
				Stfa2	1.46277	0.00950708
				Hspa1a	-1.38146	0.00955403
				Myl1	-1.7616	0.00979537
				0610039H22Rik	-1.29112	0.0113381
				Apol7c	2.04312	0.0113584
				Ankrd23	-1.54843	0.0113893
				Epyc	-1.02542	0.0126683
				Slc14a1	1.00319	0.0134946
				Rnf216	1.07059	0.0135248
				Ugt2b34	-1.22148	0.0138051
				Creb3l3	-1.13652	0.0140742
				Cd8a	1.50927	0.0149176
				4930535E02Rik	-1.62071	0.0149436
				Sgcg	-1.11666	0.0151084
				Myl7	-1.21906	0.0155716
				Tmod4	-1.33509	0.0159056
				Hspa1b	-1.07128	0.0159775
				Neil3	1.19482	0.0170237
				Murc	-1.26575	0.0178841
				Syt6	-1.30561	0.0182837
				Smtnl1	-1.79118	0.0191932
				Drd3	1.02761	0.0191969
				Preb	1.20492	0.0198471
				Krt6b	-2.53673	0.019961
				Myl4	-1.37146	0.0202782
				Sim2	-1.02779	0.0202937
				Xirp2	-1.7904	0.0209457
				Trdn	-1.65614	0.0210477
				Mb	-1.87766	0.0232473
				Obscn	1.38733	0.0233031
				Mylpf	-1.525	0.0235005
				Hrasls	-1.56562	0.0243829
				Adamtsl4	1.01593	0.0247392
				Myoz1	-1.31169	0.0267707
				Myf6	-1.45326	0.028423
				2310046A06Rik	-1.263	0.0309374
				Apobec2	-1.54153	0.0312617
				Tmem45b	-1.14299	0.0312683
				Smpx	-1.31999	0.0318061
				Cox8b	-1.41161	0.0373743
				Asb12	-1.21739	0.0379613
				Xlr3c	-1.16869	0.0392698
				Kcng2	1.17381	0.0411537
				Casq2	-1.32812	0.0413271
				Mybpc3	1.95425	0.0439403
				2310002L09Rik	-1.52707	0.0453873
				Hspb3	-1.42188	0.04681
				Myl3	-1.21736	0.0476747

## Sheet: H1N1pdm1918_DEGs
ID	GSE38112					ID	GSE70445
	3d		5d				3d		5d
	logFC	adj.P.Val	logFC	adj.P.Val			logFC	adj.P.Val	logFC	adj.P.Val
2310002J15Rik	-1.40378	0.0201406	-1.53186	0.0020474		2310002J15Rik	-2.57506	0.0012745	-2.23602	0.000495025
3300002A11Rik	-1.26651	0.000212835	-1.92398	1.13113e-05		3300002A11Rik	-1.54905	2.50293e-05	-2.55051	3.09723e-06
9130017N09Rik	1.47711	4.91632e-05	2.24965	9.76735e-06		9130017N09Rik	1.30988	7.42661e-05	2.26492	3.22531e-06
9230104L09Rik	-1.66818	0.000683906	-1.14353	0.000558967		9230104L09Rik	-1.83529	2.31361e-05	-1.23036	3.41305e-05
9330175E14Rik	1.46664	0.000571773	2.00048	0.000278083		9330175E14Rik	1.54625	0.00141402	2.59337	1.79426e-05
A430071A18Rik	-1.52289	7.35381e-05	-1.12674	2.71892e-05		A430071A18Rik	-1.81802	1.24934e-05	-1.56807	4.82655e-05
A530032D15Rik	2.25943	5.56215e-06	3.07923	1.44906e-05		A530032D15Rik	1.25756	0.000843968	2.67272	3.05728e-06
Adar	1.22261	1.07048e-05	1.4087	4.00054e-06		Adar	1.05015	3.93342e-05	1.38139	1.58939e-06
AI607873	3.20565	8.22445e-06	3.81509	3.87163e-06		AI607873	1.70251	6.03245e-05	3.64758	1.79614e-06
Aldh1b1	1.59495	0.000198853	1.7814	7.33363e-05		Aldh1b1	1.49765	0.000116125	2.3644	2.04867e-06
Apod	2.8471	0.000176825	3.09433	1.9334e-05		Apod	1.58487	0.000175459	4.14057	2.52661e-06
Apol7a	2.164	0.000286933	1.88603	0.000376411		Apol7a	2.27014	0.000657212	2.37131	4.21815e-05
Apol9b	3.43679	7.95118e-05	3.68021	3.11969e-05		Apol9b	2.28618	0.000328699	3.66386	2.08878e-05
Areg	1.9006	0.00041877	1.90807	0.000277139		Areg	2.11336	7.57819e-05	2.11562	7.80116e-05
Aspn	-1.13303	0.000626071	-1.19876	4.09161e-06		Aspn	-2.44571	5.09032e-06	-1.99131	6.37877e-05
Asprv1	-2.12551	0.00884024	-2.03065	0.00121173		Asprv1	-3.52207	0.000323979	-2.04082	0.00041142
Batf2	1.47487	0.000417032	2.31811	2.66418e-05		Batf2	1.82875	0.00229992	2.81213	4.01507e-06
BC013712	1.53292	1.7052e-05	2.02261	2.66418e-05		BC013712	1.00462	0.000276956	2.29272	4.62347e-06
Bcl11a	1.06882	0.00101776	1.22722	0.000354965		Bcl11a	1.03733	0.000449906	1.60799	6.75417e-05
Bpifa1	-3.51265	1.82702e-05	-3.68696	4.49195e-05		Bpifa1	-2.65488	4.18941e-05	-4.57536	2.45359e-06
Bpifb1	-2.09545	4.34557e-06	-2.03285	1.9334e-05		Bpifb1	-2.62966	1.11614e-05	-1.83389	9.2162e-05
Bst2	2.60932	3.92105e-07	2.7542	4.37743e-07		Bst2	1.3623	8.9272e-05	3.22522	4.45784e-07
C130026I21Rik	2.25527	2.23321e-05	2.61815	1.43389e-05		C130026I21Rik	2.08128	2.30789e-05	2.81792	3.93898e-06
C1qtnf3	-1.9124	0.00100696	-1.42876	2.79351e-06		C1qtnf3	-1.80046	1.11833e-05	-1.92573	5.86053e-05
C2	1.34023	5.59626e-06	1.19626	4.2791e-05		C2	1.02139	0.000167939	1.72069	7.34074e-06
C4b	1.04955	6.55084e-05	1.21382	2.39676e-05		C4b	1.96314	1.24934e-05	2.51404	4.71405e-06
Ccdc42	-1.3248	0.000900257	-1.07277	0.000262518		Ccdc42	-1.83804	1.68005e-05	-1.83689	3.05728e-06
Ccdc88b	1.1078	0.00929955	1.0657	6.67595e-05		Ccdc88b	1.0559	6.38332e-05	1.92872	3.09723e-06
Ccl12	2.95844	5.60857e-06	3.87698	6.82886e-07		Ccl12	2.24993	0.000119705	4.06051	3.7356e-07
Ccl2	4.17472	3.41701e-06	5.3763	7.76721e-07		Ccl2	2.67985	3.79293e-05	5.36693	1.95557e-07
Ccl20	1.47151	0.000824234	2.31313	4.59189e-05		Ccl20	1.78866	5.95169e-05	2.84902	1.32249e-05
Ccl3	2.67388	1.07048e-05	3.67205	3.20398e-06		Ccl3	1.93866	6.1108e-05	4.7399	4.45784e-07
Ccl7	5.04585	7.80899e-07	5.97461	5.05755e-07		Ccl7	3.75664	1.84731e-05	5.86816	2.83221e-07
Cd177	1.30438	0.000101063	2.11498	9.64777e-07		Cd177	2.37178	1.81399e-05	3.77757	3.16566e-07
Cd209f	-1.43657	0.00167931	-1.14712	0.000489836		Cd209f	-1.87168	5.53145e-05	-1.14418	8.0909e-05
Cd274	1.89797	1.84707e-05	2.8101	3.8713e-05		Cd274	2.17259	0.000427785	3.18062	3.22531e-06
Cd300lf	1.30437	0.000844925	1.84708	0.000185471		Cd300lf	1.00448	0.000661596	2.40612	1.00903e-05
Cd72	1.17777	0.000960577	2.19382	3.60923e-05		Cd72	1.14367	0.000121594	2.74826	7.02492e-06
Cdt1	1.10238	0.00409475	1.21751	3.8713e-05		Cdt1	1.36664	1.75355e-05	2.28726	4.81029e-07
Cfb	1.83044	5.61034e-05	2.45976	1.02944e-05		Cfb	1.00897	0.00213957	3.25608	1.92776e-06
Ch25h	3.45061	1.03373e-06	4.54638	1.19542e-06		Ch25h	2.70155	1.74087e-05	4.63822	4.3773e-07
Chit1	4.15891	7.85832e-05	4.34615	3.17749e-05		Chit1	3.99792	5.05141e-05	4.84453	1.33796e-05
Chst15	-1.13103	0.0017337	-1.56392	8.36759e-05		Chst15	-1.37662	5.24514e-05	-1.55322	1.79999e-05
Clec4g	-2.04325	3.07539e-05	-2.12075	3.46305e-05		Clec4g	-1.55683	2.60634e-05	-1.36409	8.64917e-05
Cmpk2	3.16152	4.34557e-06	3.62316	4.37743e-07		Cmpk2	2.9509	1.33668e-05	3.74555	1.95557e-07
Cnfn	-1.21566	0.0181015	-1.72266	0.000739296		Cnfn	-1.4205	0.00917524	-2.66479	1.69495e-05
Cpa3	-1.88475	0.000274586	-1.84683	0.00111215		Cpa3	-1.28614	0.00213113	-1.45162	0.00045967
Cxcl10	6.34297	6.68832e-07	7.37103	2.73118e-07		Cxcl10	7.35917	9.23674e-06	8.4988	1.32394e-08
Cxcl9	3.92137	1.79013e-05	5.36902	2.96405e-06		Cxcl9	2.64555	0.000439556	5.18249	3.05728e-06
Cyp1a1	-2.51277	0.00242552	-2.06476	0.000451895		Cyp1a1	-1.44255	0.009544	-2.89018	0.00112861
Cyp4a12a	-1.0143	0.000394215	-1.1989	4.31691e-05		Cyp4a12a	-1.91663	5.99071e-05	-2.05176	3.66242e-06
D17H6S56E-5	1.3159	0.000124601	1.38575	5.37532e-06		D17H6S56E-5	1.51757	1.78867e-05	1.80734	4.45784e-07
Daxx	1.62073	1.30462e-05	1.84797	2.41967e-05		Daxx	1.62619	3.05027e-05	2.42137	1.56816e-06
Ddx58	2.21899	1.30462e-05	2.033	1.67913e-05		Ddx58	2.09704	2.04504e-05	2.23173	2.37734e-06
Ddx60	3.08893	4.60078e-05	3.36396	2.06772e-05		Ddx60	2.0271	0.000160322	2.81248	2.27485e-05
Dhx58	3.03669	3.99365e-06	3.36186	5.23225e-06		Dhx58	2.52891	3.11297e-05	3.71248	1.37241e-06
Drd3	1.41229	0.00867653	1.11621	0.0313527		Drd3	2.0708	0.000936517	1.02761	0.0191969
Dusp2	1.33745	0.00649992	1.83217	0.000193455		Dusp2	1.18447	0.000171932	2.47243	9.70302e-06
Egr1	1.61421	0.00218282	1.69484	0.00157015		Egr1	2.81743	6.77619e-05	2.06439	0.000266971
Eif2ak2	1.87762	1.50398e-05	2.02459	6.56023e-06		Eif2ak2	1.67346	3.55734e-05	2.17675	1.37406e-06
Eomes	1.27484	0.00121288	1.83868	4.75753e-05		Eomes	1.4386	5.39948e-05	2.43409	4.51993e-06
Fam26f	2.74363	6.34829e-05	4.23977	1.82486e-05		Fam26f	1.84494	0.00150623	4.07819	4.74997e-06
Fcgr1	3.09449	1.51181e-06	3.84522	8.32612e-07		Fcgr1	2.1678	2.50681e-05	4.42818	1.95557e-07
Gbp1	1.81676	5.10177e-05	2.55885	1.16152e-05		Gbp1	1.91384	0.0010197	2.49836	1.18797e-05
Gbp2	1.63478	1.42282e-05	2.25476	5.46568e-06		Gbp2	1.40026	0.00237599	2.12583	1.01124e-05
Gbp3	2.66745	8.76485e-06	2.96737	1.96728e-06		Gbp3	2.22466	0.000152588	2.84107	3.22531e-06
Gbp5	2.90832	9.77894e-06	3.64412	2.96405e-06		Gbp5	3.69547	3.20119e-05	4.28267	1.92161e-06
Gbp6	2.5658	2.4905e-06	3.54403	3.686e-06		Gbp6	2.16844	0.000999808	3.1939	6.7802e-06
Gbp7	1.41066	0.000278722	2.16851	2.38811e-05		Gbp7	1.59639	0.00134338	1.94553	2.24431e-05
Gbp8	1.59584	0.000254867	2.30212	0.000101454		Gbp8	1.08506	0.026503	2.34273	6.62699e-05
Gbp9	1.25081	0.000615202	1.85117	0.000159578		Gbp9	1.23848	0.00334618	2.13255	1.76688e-05
Gck	-1.08153	0.00806918	-1.11443	0.000144127		Gck	-1.11587	0.000111592	-1.59907	1.79837e-05
Gm12250	2.72994	3.12134e-05	3.7673	2.81375e-06		Gm12250	2.81463	0.00050822	3.91197	4.94218e-06
Gm14446	2.83776	1.35607e-05	3.40053	1.35064e-05		Gm14446	1.46401	0.000475845	3.03969	4.41561e-06
Gm1966	1.53469	0.000179505	1.99412	3.14219e-05		Gm1966	1.10509	0.00081645	1.62911	4.13811e-05
Gm4759	1.34797	0.00178689	1.72041	5.88884e-05		Gm4759	1.65711	6.3939e-05	2.02637	3.09629e-05
Gm4951	3.60094	2.2367e-05	4.26015	5.44105e-06		Gm4951	3.61311	4.83667e-05	4.04697	4.47598e-06
Gm4955	4.52403	4.34557e-06	4.92346	2.86311e-06		Gm4955	3.6554	2.86007e-05	5.28735	1.72513e-06
Gm5431	1.34258	0.000193572	1.92879	3.93879e-05		Gm5431	1.19372	0.000699222	1.71204	2.02181e-05
Gm8995	1.42172	0.000320639	1.62681	3.20567e-05		Gm8995	1.06538	0.000744626	2.09731	1.49698e-05
Gm9975	1.12126	7.45756e-05	1.36437	2.31204e-05		Gm9975	1.40426	2.49932e-05	1.13056	0.000114166
Gvin1	1.50696	0.000155425	1.73297	2.38811e-05		Gvin1	1.30541	0.000485003	2.05424	1.18797e-05
H2-T24	1.77698	1.88954e-05	2.02737	1.96728e-06		H2-T24	1.11347	0.000273247	1.84802	1.01242e-05
H28	4.29882	2.63376e-06	4.94823	1.5884e-06		H28	3.28619	1.91814e-05	4.9481	1.18081e-06
Hand2	1.04169	0.00806007	1.39186	0.00342942		Hand2	1.53307	0.00163657	1.82816	0.000504776
Herc6	2.20613	6.16679e-06	2.5591	5.16862e-06		Herc6	1.47453	0.000289355	2.49898	5.20002e-07
Hmcn1	-1.12778	0.00202565	-1.13305	0.000254534		Hmcn1	-1.02292	0.000114543	-1.24816	0.000166289
Hsh2d	2.13852	1.34985e-05	2.47851	5.38105e-06		Hsh2d	1.3657	0.00046392	2.73368	1.64647e-06
Hspa1a	-1.67515	0.0116909	-2.37208	0.00101571		Hspa1a	-1.3917	0.00991296	-1.38146	0.00955403
I830012O16Rik	3.41619	2.52286e-06	3.92939	4.53127e-07		I830012O16Rik	2.45145	1.11833e-05	3.51695	9.6953e-07
Ifi202b	3.04122	3.07539e-05	3.76218	9.76735e-06		Ifi202b	2.0164	0.000130257	3.5019	3.59771e-06
Ifi203	1.3439	0.00111392	1.72557	4.10468e-05		Ifi203	1.18782	0.000344828	1.77867	8.77397e-06
Ifi204	2.28683	7.83859e-06	2.76874	4.99603e-06		Ifi204	1.37087	0.000104195	2.45181	1.65013e-06
Ifi205	1.90315	0.000202489	2.5775	4.88678e-05		Ifi205	1.45408	0.0001028	2.46687	4.56631e-06
Ifi27l2b	2.49974	0.000887384	2.51017	0.000145147		Ifi27l2b	1.5478	0.000829684	2.84176	2.57677e-05
Ifi44	4.24196	7.65841e-05	4.55098	1.69657e-05		Ifi44	2.94832	9.53374e-05	4.6057	6.78973e-06
Ifi47	1.57619	0.000174519	2.33173	2.9292e-05		Ifi47	1.14559	0.00697209	2.29537	5.85808e-06
Ifih1	1.7194	1.84707e-05	2.08512	4.39364e-06		Ifih1	1.31205	0.000242566	2.37735	1.26056e-06
Ifit1	4.13737	1.03373e-06	4.29391	4.60312e-07		Ifit1	2.97136	1.60643e-05	3.94861	3.88003e-07
Ifit2	2.75368	2.61043e-05	3.51519	4.09161e-06		Ifit2	1.8418	6.38332e-05	3.21391	9.80779e-07
Ifit3	3.60829	3.63632e-07	3.79324	2.83583e-07		Ifit3	3.02259	1.11614e-05	3.91956	1.95557e-07
Ifng	2.51133	1.59788e-05	4.30982	1.98278e-05		Ifng	2.58888	0.0016929	4.35569	4.91303e-06
Ighv14-2	1.06359	0.0135473	1.22745	0.0045884		Ighv14-2	1.63682	0.000673653	1.51246	0.00255819
Igtp	2.56186	3.41701e-06	3.22267	4.99603e-06		Igtp	2.48653	0.000358259	3.2381	1.92161e-06
Iigp1	2.88998	3.33932e-05	3.37579	2.35458e-05		Iigp1	2.90641	0.000224143	3.45849	8.80143e-06
Il18bp	2.14133	1.03373e-06	2.87255	3.06072e-06		Il18bp	1.18001	0.00264976	3.49015	1.63708e-06
Il1rn	2.4195	1.79013e-05	3.40724	2.39397e-06		Il1rn	1.11463	6.90512e-05	3.50249	9.70429e-07
Irf7	4.55116	9.89468e-07	5.08468	5.90643e-07		Irf7	4.30782	1.09178e-05	6.33327	2.94536e-07
Irf9	1.53132	4.65394e-06	1.52869	1.52226e-05		Irf9	1.01916	0.000120003	1.42916	2.52661e-06
Irg1	6.83248	6.91005e-07	7.73026	2.73118e-07		Irg1	5.69362	1.09178e-05	7.86618	1.95557e-07
Irgm1	2.32735	1.59788e-05	2.7093	1.67913e-05		Irgm1	1.81987	0.000224739	2.66745	5.18524e-06
Irgm2	2.24114	3.37266e-06	2.65815	2.79351e-06		Irgm2	2.37885	0.000272207	2.84993	2.91748e-06
Isg15	4.52199	3.92105e-07	4.83102	2.73118e-07		Isg15	3.23286	1.11833e-05	4.89524	1.95557e-07
Krt17	2.12261	0.000696233	1.75169	2.55894e-05		Krt17	1.60911	1.8915e-05	1.58976	1.25226e-05
Krtdap	-2.71097	0.0463049	-2.31373	0.00282521		Krtdap	-5.77899	0.00301785	-3.73671	0.000169278
Lce1i	-1.83888	0.0414494	-1.935	0.00624744		Lce1i	-2.75508	0.00361461	-2.95057	0.000223417
Lce3c	-3.21959	0.0232576	-3.27009	0.000921039		Lce3c	-5.34056	0.00455617	-3.88405	0.000333576
Lgals3bp	2.16498	6.68832e-07	2.40858	2.73118e-07		Lgals3bp	1.70722	1.85826e-05	3.28635	1.95557e-07
Ly6e	1.01636	0.000247058	1.69723	1.0364e-05		Ly6e	1.38946	4.91268e-05	2.80621	3.44445e-07
Mlkl	1.50016	5.7521e-05	2.15724	1.84484e-05		Mlkl	1.11471	0.00103104	2.42392	5.01746e-06
Mnda	1.82021	0.000198853	2.00932	6.66381e-05		Mnda	1.18641	0.000840385	1.89702	4.86071e-05
Ms4a6c	2.29639	3.12134e-05	3.20703	8.63846e-06		Ms4a6c	1.16581	0.000859995	3.46836	2.28794e-06
Mthfd1l	1.39021	0.000143038	1.01725	0.000740389		Mthfd1l	1.25963	2.72351e-05	1.64356	1.92776e-06
Muc4	1.25048	0.000149764	1.10297	3.60626e-05		Muc4	1.02844	6.76085e-05	1.88898	2.39203e-06
Mx2	3.92526	1.32034e-06	3.96549	1.5884e-06		Mx2	3.46508	1.11833e-05	4.0239	4.81029e-07
Mybpc3	1.52608	0.0299555	1.37851	0.0492231		Mybpc3	2.07434	0.032552	1.95425	0.0439403
Nlrc5	2.07601	0.00115195	2.37701	1.60595e-05		Nlrc5	2.36263	0.000789051	2.02811	7.51295e-05
Npr3	-1.46193	0.00264022	-1.09214	0.00649289		Npr3	-1.8063	0.000237893	-1.66198	0.000176525
Oas1a	3.61969	9.89468e-07	4.09541	2.00718e-06		Oas1a	2.77308	1.66945e-05	4.22425	2.83221e-07
Oas1b	1.78251	5.7138e-05	1.94633	3.41457e-05		Oas1b	1.71826	3.70698e-05	2.3857	4.74997e-06
Oas1f	3.46094	4.6609e-06	3.75132	2.86311e-06		Oas1f	2.38095	5.05141e-05	4.17292	1.67794e-06
Oas2	3.10249	1.79013e-05	3.38525	8.98905e-06		Oas2	2.30667	6.3525e-05	3.61565	4.02207e-06
Oasl1	4.43127	1.56497e-06	5.0909	7.19546e-07		Oasl1	4.83158	5.09032e-06	5.95568	1.95557e-07
Oasl2	3.067	1.56497e-06	3.23664	9.97643e-07		Oasl2	3.03964	1.11833e-05	3.80535	4.46937e-07
Parp14	1.50356	1.17567e-05	1.79599	4.39364e-06		Parp14	1.66584	6.67675e-05	2.00973	3.05728e-06
Phf11	2.41473	1.07048e-05	2.91539	1.45354e-06		Phf11	1.41295	7.40471e-05	2.65006	1.24079e-06
Plac8	2.0076	1.90204e-05	2.59425	6.97678e-06		Plac8	1.10512	0.000866565	3.20649	1.06761e-06
Plekha4	1.2346	0.000687635	1.26611	7.08816e-05		Plekha4	1.30708	2.6326e-05	1.73791	4.51993e-06
Pou3f1	1.8328	0.000607634	2.41849	0.000154869		Pou3f1	2.14558	0.000290617	3.65236	2.53598e-05
Prss22	2.43798	9.20059e-06	2.6634	5.80674e-07		Prss22	2.36627	1.33668e-05	2.88023	9.6953e-07
Psmb10	1.04268	2.52082e-05	1.1707	4.68234e-06		Psmb10	1.40386	0.000162755	1.98441	1.65013e-06
Pyhin1	2.76825	1.29248e-05	3.22414	1.29989e-05		Pyhin1	1.87291	6.71418e-05	3.35393	2.45764e-06
Retnla	2.91683	5.60857e-06	2.6928	9.42736e-07		Retnla	1.1969	0.000459841	2.89674	2.24553e-06
Rgs16	1.249	0.000369979	1.68109	0.000102732		Rgs16	1.05003	0.000349496	2.21536	4.24155e-06
Ric3	-1.33273	4.47824e-05	-1.19583	1.37574e-05		Ric3	-1.17032	6.3525e-05	-1.02462	5.01401e-05
Rnf213	1.7946	5.39128e-06	1.97835	3.20398e-06		Rnf213	1.80649	3.70698e-05	2.32353	3.05728e-06
Rsad2	4.26241	8.8337e-06	4.90201	2.86311e-06		Rsad2	4.16464	1.63344e-05	4.95253	1.86873e-06
Rtp4	2.50526	1.16227e-06	2.72048	2.73118e-07		Rtp4	2.29996	2.43804e-05	3.24192	2.76953e-07
Saa2	2.68306	7.97518e-05	4.19835	1.36928e-06		Saa2	1.08116	2.71325e-05	4.34227	5.64377e-07
Saa3	3.96731	3.64316e-05	5.42181	1.96728e-06		Saa3	1.32869	0.00765087	6.32063	8.31843e-07
Samd9l	1.38977	0.00718466	1.66944	2.17424e-06		Samd9l	1.45145	2.86149e-05	1.84461	8.39633e-06
Sbsn	-1.03045	0.00702296	-1.19275	0.00139314		Sbsn	-1.41804	0.000444205	-1.8605	3.46558e-05
Scgb3a1	-2.33734	4.96647e-06	-3.33228	4.37663e-05		Scgb3a1	-2.31364	1.09178e-05	-4.10615	1.37241e-06
Sct	3.26043	2.4905e-06	3.57404	1.5884e-06		Sct	2.291	2.49932e-05	4.19954	2.37624e-06
Sectm1b	1.90365	0.000104972	2.00094	4.68865e-06		Sectm1b	1.1607	0.000420528	1.54227	3.06189e-06
Serpinb12	-1.85535	0.0109494	-1.39298	0.0242679		Serpinb12	-3.54613	0.00182176	-3.42368	0.000255687
Siglec1	2.2018	3.37266e-06	2.64105	9.64777e-07		Siglec1	1.36198	4.29973e-05	3.25693	9.80779e-07
Slc7a5	1.10207	0.000131785	1.56352	1.66644e-05		Slc7a5	1.55537	1.09178e-05	2.69398	2.39571e-07
Slfn1	2.46386	7.33765e-05	3.4216	1.80508e-05		Slfn1	1.27968	0.00361022	3.71319	2.39434e-06
Slfn10-ps	2.81352	1.26057e-05	3.13019	4.22368e-06		Slfn10-ps	2.38476	2.7809e-05	3.35169	2.37624e-06
Slfn2	2.12153	1.31379e-05	2.49076	1.60595e-05		Slfn2	1.18793	0.000208767	2.37351	6.38535e-06
Slfn3	3.04296	1.09088e-05	3.60294	2.00718e-06		Slfn3	1.62763	6.81982e-05	3.6163	8.14004e-07
Slfn4	4.33192	2.82643e-05	4.98521	5.85044e-06		Slfn4	2.17778	0.000212432	5.2059	3.22531e-06
Slfn8	2.71604	1.31379e-05	3.43059	1.95441e-06		Slfn8	2.24213	2.79098e-05	3.61437	8.23253e-07
Slfn9	3.02472	6.94488e-06	3.70097	1.91391e-06		Slfn9	2.45836	2.19324e-05	3.40038	1.3706e-06
Socs1	2.0711	0.000425145	2.605	4.36735e-05		Socs1	2.43999	0.000168732	3.60418	1.45185e-06
Sp100	1.59432	2.23749e-05	1.56414	1.26105e-05		Sp100	1.14528	7.86791e-05	1.67729	7.50281e-06
Sp110	1.24098	3.93124e-05	1.44084	2.31002e-05		Sp110	1.82261	1.85671e-05	2.12917	1.01751e-06
Spats2l	1.58458	2.58342e-05	1.8482	1.02944e-05		Spats2l	1.0844	0.000116943	1.87394	4.34482e-06
Stat1	1.81982	7.83859e-06	1.96688	2.86311e-06		Stat1	1.65795	0.000180112	2.08704	6.78973e-06
Stat2	2.11044	5.95431e-06	2.17506	3.12669e-06		Stat2	2.25565	2.33353e-05	2.63059	1.48014e-06
Tap1	1.48635	0.000148057	2.46568	2.41967e-05		Tap1	2.66973	8.96206e-05	3.6759	3.97084e-06
Tap2	1.17155	0.000175589	1.57451	1.87811e-05		Tap2	1.79838	3.11297e-05	2.80197	1.92161e-06
Tcstv3	2.82799	2.52286e-06	3.38035	2.92963e-06		Tcstv3	1.08235	0.000108866	3.24102	6.2603e-07
Tff2	-3.0847	2.82643e-05	-3.42084	1.89911e-05		Tff2	-3.3433	2.87624e-05	-3.63195	3.28017e-05
Tgtp1	2.3735	1.82702e-05	2.98024	1.60595e-05		Tgtp1	2.06214	0.000762156	2.92164	6.86979e-06
Thbs1	1.57117	0.000336485	1.44784	0.000120679		Thbs1	1.94644	3.09304e-05	1.53722	3.27961e-05
Timp1	3.03386	7.61902e-06	3.96163	4.53127e-07		Timp1	1.37602	0.000237553	4.09686	2.83221e-07
Tor3a	1.94521	3.37266e-06	2.23431	2.72881e-06		Tor3a	1.4697	5.90445e-05	2.29014	1.92527e-06
Trafd1	1.07557	8.13552e-05	1.25223	4.95027e-05		Trafd1	1.35565	3.79293e-05	2.21741	2.80069e-06
Trim12a	1.91873	7.19771e-05	1.62622	5.9897e-05		Trim12a	1.58696	5.05141e-05	1.26987	0.000100746
Trim30a	2.35175	3.41701e-06	2.82563	1.72196e-06		Trim30a	1.51459	9.28163e-05	2.79179	9.6953e-07
Trim30d	2.15274	3.65583e-06	2.633	3.686e-06		Trim30d	1.57841	6.95714e-05	3.15709	4.45784e-07
Trim34a	1.32126	0.000194651	1.58341	1.34782e-05		Trim34a	1.21635	4.17818e-05	1.83201	6.67611e-06
Trim6	1.52608	0.00241453	1.10404	0.000338455		Trim6	1.30435	0.00119763	1.39144	0.000461545
Uba7	1.15019	0.000298891	1.32269	5.30898e-05		Uba7	1.64586	7.69226e-05	2.08418	4.56631e-06
Uhrf1	1.82353	0.0146666	2.00643	6.7109e-06		Uhrf1	1.29155	5.29999e-05	2.54025	3.39634e-07
Usp18	3.41599	3.63632e-07	3.77566	3.98078e-07		Usp18	2.73651	1.11833e-05	3.61238	2.94536e-07
Xaf1	2.23386	3.41701e-06	2.64182	4.32944e-06		Xaf1	1.61601	7.94151e-05	2.71868	9.70429e-07
Xdh	1.1976	0.00085629	1.54523	0.000595416		Xdh	2.26411	6.92241e-05	3.30582	6.99031e-06
Zbp1	4.87263	1.32034e-06	5.16344	9.42736e-07		Zbp1	4.07285	1.50476e-05	5.39116	9.6953e-07
Zc3hav1	1.54319	3.07539e-05	1.80856	1.10744e-05		Zc3hav1	1.44204	3.83595e-05	1.85157	6.63765e-06

## Sheet: H1N1pdms_DEGs
3dpi	5dpi
Oasl1	Rtp4
Cxcl10	Lgals3bp
Irf7	Cxcl10
Ifit3	Ifit3
Usp18	Usp18
Mx2	Bst2
Oasl2	Timp1
Zbp1	Ccl7
Ch25h	Irf7
Ccl7	Ccl12
Lgals3bp	Oasl1
Ddx58	Ccl2
Stat2	Fcgr1
Rtp4	Retnla
Fcgr1	Zbp1
Ccl2	Cd177
Oas2	Oasl2
Ifit2	Ch25h
Parp14	Mx2
Bst2	Saa3
Ccl12	Tgfbi
Apod	Ms4a6d
Stat1	Ms4a7
Timp1	Il1rn
Ifih1	Stat1
Ifi203	Cxcl9
Cxcl9	Gbp5
Ms4a6c	Stat2
Plac8	Ccl3
Mlkl	Ifit2
Slfn1	Parp14
Saa3	Ifih1
	Igtp
	Gbp2
	Plac8
	Ms4a6c
	Oas2
	Isg20
	Slc26a4
	Gpr65
	Ddx58
	Slfn1
	Mlkl
	Apod
	Psmb8
	Ifi35
	Daxx
	Tap1
	Ccl8
	Ifi47
	Rgs1
	Lilrb4
	Gatm
	Ms4a6b
	Trafd1
	Aif1
	Atf3
	Fcgr2b
	Rgs16
	Il10ra
	Ogfr
	Socs3
	Serpina3n
	Ubd
	Casp4
	Ly86
	Areg
	Car13
	Ppa1
	Cxcl13
	Vav1
	Gch1
	Gpr171
	Orm1
