# Supplementary material for: The Identification Distinct Antiviral Factors Regulated Influenza Pandemic H1N1 Infection
Source: Int J Microbiol. 2024 Jan 9;2024:6631882. doi: 10.1155/2024/6631882 (PMC10791480; doi:10.1155/2024/6631882)
Supplement: Supplementary Materials — Supplementary data1: the DEG in A/California/04/2009 H1N1 infection. Supplementary data2: the DEG in two different strains of H1N1pdm09 (A/Jena/5258/09 and A/California/7/2009). Supplementary data3: the overlapped DEGs in all analysed datasets infected with H1N1pdm09 strains at 3dpi and 5dpi. Supplementary data4: H1N1pdm1918-induced DEGs. Supplementary data5: the DEGs induced by nH1N1pdm. [file 6631882.f1.zip › Supplementary data 5.xlsx]

## Sheet: 3d
ID	GSE57008			ID	GSE99189			ID	GSE99190			ID	GSE77600
	logFC	adj.P.Val			logFC	adj.P.Val			logFC	adj.P.Val			logFC	adj.P.Val
Gm14446	4.38639	2.25826e-07		Cxcl10	7.29469	3.67133e-07		Ly6i	5.6243	1.77988e-09		Irf7	5.33	9.70704e-07
Ifit2	3.75056	2.44481e-07		Mnda	4.95496	5.68908e-07		Irf7	4.37679	1.77988e-09		Il6	6.081	9.70704e-07
Isg15	4.38222	2.44481e-07		Ifi204	6.07761	6.06652e-07		Slfn4	5.85413	3.57018e-09		Gm15056	4.74233	9.70704e-07
Apod	4.19333	2.44481e-07		Ifit1	4.80629	6.87733e-07		Zbp1	4.19219	3.57018e-09		Ifit1	4.40333	1.47542e-06
Slfn4	6.84667	2.44481e-07		Slfn4	6.19375	6.87733e-07		Cfb	3.56716	3.57018e-09		Irg1	6.74833	2.35474e-06
Usp18	3.40361	2.44481e-07		Mx1	3.82144	6.87733e-07		Saa3	7.47404	5.95023e-09		Oas1f	3.78133	2.41073e-06
Cxcl10	6.96167	2.44481e-07		Saa3	8.8083	7.98884e-07		Tnf	3.11892	9.71392e-09		Timp1	5.378	2.67118e-06
Slfn3	5.50556	2.44481e-07		Ms4a4a	4.36337	7.98884e-07		Fcgr1	4.16704	9.71392e-09		Serpina3m	4.50967	4.0591e-06
Rsad2	5.49028	2.44481e-07		Rnf213	2.24493	7.98884e-07		Igtp	3.50547	1.53759e-08		Ly6f	4.01733	4.63954e-06
Saa1	3.50222	2.44481e-07		Oasl2	2.66527	7.98884e-07		Isg15	3.48941	1.95697e-08		Oas3	4.80933	4.63954e-06
Ifit1	4.11333	2.72211e-07		Ms4a7	3.37412	7.98884e-07		Rsad2	3.71202	2.19528e-08		Ms4a6c	3.53667	4.63954e-06
AA467197	4.26722	2.72211e-07		Tgtp2	3.64163	7.98884e-07		Ifit1	3.9644	2.45048e-08		Gzmc	2.82767	4.63954e-06
Gm4951	3.17944	2.72211e-07		Mx2	3.79873	8.41088e-07		Oas3	3.41226	2.68391e-08		Ly6i	5.10467	4.63954e-06
Ms4a4c	4.24556	2.72211e-07		Fcgr1	5.36213	8.60027e-07		Gm12250	4.54864	2.68391e-08		Isg15	4.35967	4.63954e-06
Fcgr1	4.57361	2.72211e-07		Rsad2	4.34508	1.14967e-06		Usp18	3.55287	2.68391e-08		Rhcg	2.84867	4.63954e-06
Gm9706	4.69278	2.72211e-07		Ddx60	2.96139	1.21952e-06		Oas2	3.30182	2.68391e-08		Oas1a	3.933	4.63954e-06
Irf7	4.56167	2.72211e-07		Ifi44	3.38664	1.21952e-06		Ccl2	4.50357	2.68391e-08		Usp18	3.714	4.63954e-06
Ifi44	3.97667	3.54532e-07		Slfn1	3.35884	1.2719e-06		Dhx58	2.94382	2.68391e-08		I830012O16Rik	4.60233	4.63954e-06
Apol9a	4.04444	3.68072e-07		Isg15	3.53915	1.56371e-06		Cmpk2	2.67114	2.77263e-08		Cfb	4.23567	4.63954e-06
Zbp1	4.33	3.68072e-07		Zbp1	4.3563	1.56371e-06		Tap1	2.34687	2.79886e-08		Ifi27l2a	2.561	5.10723e-06
Timp1	4.98028	3.87921e-07		Irf7	4.32444	1.56371e-06		Ms4a6d	3.71434	2.79886e-08		Ifi204	4.366	5.14328e-06
Cxcl11	5.00333	3.87921e-07		Irgm1	2.60936	1.56371e-06		Cxcl10	5.83745	2.85672e-08		Cyp7b1	2.417	5.14328e-06
Ifit3	3.6	3.91139e-07		Iigp1	3.01667	1.71969e-06		Ccl7	4.06711	2.85672e-08		Apol9a	4.51133	5.94317e-06
Ccl7	5.42639	3.91139e-07		Cxcl9	4.98122	2.14452e-06		Cxcl9	5.27204	2.85672e-08		Siglec1	3.00233	5.97154e-06
Ifi205	3.44583	4.43701e-07		Klra2	2.28778	2.59473e-06		Trim30c	3.88886	3.57275e-08		Mx2	4.16333	6.1112e-06
Mx1	6.03	4.55965e-07		LOC100038947	2.92387	2.59473e-06		Mx1	4.24006	3.57275e-08		Soat2	2.609	6.13081e-06
Fam26f	5.03056	4.55965e-07		Mt2	4.02406	2.59473e-06		Gbp3	2.61753	3.70303e-08		Sct	4.13333	6.65037e-06
Trim30d	3.01361	4.55965e-07		Gbp5	3.75411	2.59473e-06		Apod	4.92684	3.70303e-08		Oasl1	5.42267	6.74589e-06
Phf11d	2.90306	5.425e-07		Herc6	2.627	2.59545e-06		A430084P05Rik	2.56448	3.92534e-08		Trim30a	2.78567	7.7276e-06
Xaf1	2.82583	6.84355e-07		I830012O16Rik	2.84451	2.72103e-06		Nlrc5	2.66764	3.98271e-08		Mnda	4.635	7.7276e-06
Cmpk2	2.96389	6.84355e-07		Tnip3	3.69121	3.03416e-06		Slfn1	2.62124	5.18372e-08		Mx1	5.56867	8.68072e-06
Ms4a6d	3.68583	7.61789e-07		Xaf1	2.2499	3.06669e-06		Oasl1	3.95379	5.18372e-08		Serpina3n	3.16233	8.88953e-06
Saa3	5.01139	7.61789e-07		Trim30b	2.39892	3.36279e-06		Slfn2	2.40173	5.61329e-08		Ccl8	3.08067	9.0415e-06
Herc6	3.55722	7.84848e-07		Slamf7	2.28207	3.36279e-06		Gbp5	3.1612	5.67914e-08		AA467197	4.01067	9.41367e-06
Ifi204	5.28472	7.93703e-07		Irf9	1.47477	3.36279e-06		Oas1b	2.42049	5.67914e-08		C130026I21Rik	2.80667	9.41367e-06
Cxcl5	4.72333	8.19536e-07		Oasl1	4.16089	3.44253e-06		Ddx60	3.16265	5.67914e-08		Zbp1	4.68233	9.41367e-06
Gbp3	2.58167	8.87902e-07		Irg1	4.8752	3.44253e-06		Slfn9	3.03726	5.79374e-08		BC147527	2.697	9.82013e-06
Ifi204	3.10528	8.87902e-07		Slfn9	4.12447	3.44253e-06		Irgm1	2.67894	6.31543e-08		Saa4	2.49133	1.01171e-05
Cxcl9	5.42611	8.87902e-07		Parp14	2.00687	3.44253e-06		Ifi205	4.85482	6.34581e-08		Saa1	6.56633	1.01171e-05
Mlkl	2.85806	8.87902e-07		AA467197	4.56771	3.44253e-06		Cd72	2.63141	6.52794e-08		Cmpk2	3.451	1.10284e-05
Ccl4	3.16389	8.87902e-07		Stat2	2.38262	3.44253e-06		AA467197	3.67512	6.52794e-08		Ifit3	4.32367	1.10284e-05
Cd274	3.27056	8.87902e-07		Gpnmb	3.04925	3.45583e-06		Orm2	3.02258	6.66536e-08		Gm4955	3.29033	1.10284e-05
Stat1	2.2225	9.30173e-07		Chl1	4.39649	3.51372e-06		Ms4a6c	3.2061	6.66536e-08		Rtp4	2.222	1.10284e-05
Irgm1	2.72028	9.30173e-07		Parp9	1.8009	3.51372e-06		Stat2	2.4056	6.95838e-08		Saa3	8.06667	1.16824e-05
Rtp4	2.35806	9.30173e-07		Lilrb4	2.7804	3.70322e-06		Gbp2	2.66953	7.03672e-08		Fam26f	3.46867	1.16824e-05
Ddx60	3.83444	9.30173e-07		Ifi205	5.72535	3.7142e-06		Mnda	3.93416	7.0522e-08		Ms4a6d	3.79233	1.18775e-05
Oas1a	3.685	9.30173e-07		Apod	4.46241	3.71933e-06		Herc6	2.8335	7.23235e-08		Adamts4	3.18367	1.20337e-05
Ifih1	2.18778	9.30173e-07		Il1b	4.10906	3.72234e-06		AW112010	2.46888	7.23235e-08		Ifi27l2b	2.138	1.20337e-05
Slfn8	4.03306	9.46179e-07		C130026I21Rik	1.98799	3.798e-06		Rnf213	2.20813	7.23235e-08		Lilrb4	3.04533	1.25526e-05
Ms4a6c	3.3825	1.04485e-06		C3ar1	3.4655	3.798e-06		Gm4841	3.01747	7.23235e-08		Ifnb1	5.57967	1.43614e-05
Iigp1	2.71806	1.04805e-06		Timp1	5.51335	4.02519e-06		Lilrb4	2.39032	7.65949e-08		Trex1	2.648	1.60435e-05
Plac8	2.66	1.04805e-06		AI607873	3.30827	4.08216e-06		Epsti1	2.57616	7.66352e-08		Dusp2	2.23033	1.60435e-05
Dck	2.39722	1.04805e-06		Ifih1	2.28991	4.27129e-06		Xaf1	2.08336	7.78306e-08		Asgr1	-2.45033	1.60435e-05
Gbp6	3.12806	1.04805e-06		Rtp4	2.31473	4.46243e-06		Tgfbi	2.56631	7.78306e-08		Gm14446	4.41467	1.60435e-05
Il6	6.48833	1.04805e-06		Usp18	3.91904	4.52187e-06		Chl1	3.12912	7.78306e-08		Slc39a14	2.20733	1.60435e-05
Oasl1	4.39417	1.04805e-06		Casp4	2.51502	5.01221e-06		Iigp1	2.64003	7.78306e-08		Slfn8	3.83733	1.63272e-05
Ifi203	3.07639	1.05683e-06		Ccl2	5.50425	5.10343e-06		Rtp4	2.19413	9.369e-08		Pyhin1	3.797	1.63272e-05
Trim30a	3.11361	1.06398e-06		Ms4a4c	3.67214	5.24683e-06		Oas1g	4.75492	9.79454e-08		Ms4a7	2.97567	1.63272e-05
Cxcl3	3.495	1.07517e-06		Oas2	3.49626	5.588e-06		Ptafr	2.63446	1.00382e-07		Xaf1	2.84333	1.63272e-05
Ifi27l2a	2.66833	1.16935e-06		Oas1g	4.71631	5.64731e-06		Saa1	3.35368	1.03285e-07		Phf11	3.414	1.74749e-05
Oasl2	3.70861	1.34706e-06		Thbs3	-1.91809	5.68752e-06		H2-T22	2.46615	1.03358e-07		Mxd1	2.31633	1.81084e-05
Gm6377	3.54861	1.34706e-06		Serpina3n	2.58487	6.09159e-06		Ifit2	2.71462	1.03358e-07		Cd177	2.92367	1.8271e-05
Adamts4	2.29611	1.49085e-06		Cxcl5	4.11052	6.13182e-06		Ifi204	5.07955	1.06372e-07		Gpr65	1.982	1.8271e-05
Socs3	2.07278	1.49085e-06		Serpina3f	4.00507	6.51061e-06		Ccl3	3.50082	1.19341e-07		Oas2	3.595	1.8271e-05
Il1rn	3.65444	1.57512e-06		Oas1a	3.17701	6.51061e-06		Ms4a6b	2.99971	1.19341e-07		Plac8	3.31167	1.8271e-05
Dhx58	3.67333	1.61101e-06		Parp12	1.73167	6.5339e-06		Gm14446	4.43795	1.22936e-07		D14Ertd668e	3.07567	1.8271e-05
Cd86	2.98056	1.64797e-06		Vcan	2.93596	7.35816e-06		Gm6907	2.33298	1.24558e-07		Il1rn	2.945	1.8271e-05
Irg1	4.89667	1.87357e-06		Igsf6	2.69717	7.35816e-06		Oas1a	3.12355	1.35252e-07		Ifit2	3.87867	1.8271e-05
Bst2	2.51667	2.06553e-06		Trim30a	2.23742	7.78033e-06		Gm5431	3.77339	1.35252e-07		Gm7609	1.80533	1.87456e-05
Vcan	2.75	2.06553e-06		Eif2ak2	2.22642	7.81887e-06		Oasl2	2.6386	1.35252e-07		Eif2ak2	2.52067	1.92647e-05
Ifi47	2.51	2.15033e-06		Retnla	3.43595	8.12744e-06		Atf3	2.27175	1.53651e-07		Gm9706	4.79	1.94113e-05
Isg20	2.3625	2.23403e-06		Ccl7	5.01895	8.77135e-06		Parp12	1.84018	1.53651e-07		Gm6907	1.80567	1.94113e-05
Cfb	3.1775	2.26495e-06		Tarm1	3.80263	8.78942e-06		Stat1	2.27235	1.53651e-07		Slfn10-ps	3.392	1.9441e-05
Ms4a6b	3.11028	2.33029e-06		Slc26a4	2.65619	8.86652e-06		Ms4a4c	3.40099	1.55923e-07		Dhx58	3.24933	2.0158e-05
Trim30a	2.71417	2.33029e-06		Stat1	2.05307	9.02369e-06		Parp9	1.94608	1.58518e-07		Orm2	3.12633	2.0158e-05
Gbp2	2.41833	2.39978e-06		Cmpk2	2.9113	9.18581e-06		Gm4951	3.16361	1.59193e-07		9130017N09Rik	2.45133	2.0158e-05
Ccl2	4.57833	2.53553e-06		Ch25h	4.52046	9.18581e-06		Ly6c2	3.23455	1.65741e-07		Saa2	4.706	2.05299e-05
Mndal	2.24083	2.53553e-06		Pla2g7	2.96336	9.18581e-06		Gm8979	1.96984	1.67899e-07		Oasl2	3.426	2.11802e-05
Ptx3	3.65722	2.8095e-06		Ankrd1	2.25469	9.18581e-06		BC013712	2.33961	1.67899e-07		Fcgr1	4.026	2.15877e-05
Casp4	2.48889	3.31829e-06		Gm8995	1.98153	9.18581e-06		Ctss	1.7921	1.72497e-07		Rnf213	2.56367	2.16173e-05
Slamf8	2.69972	3.7406e-06		Gm14446	4.44163	9.18581e-06		Gpr141	2.57426	1.7858e-07		9930023K05Rik	3.164	2.17225e-05
Slfn1	3.36778	3.83394e-06		Cd72	2.67942	9.18581e-06		Olfr56	2.39191	1.80819e-07		Stat2	2.19367	2.19798e-05
Cxcl2	3.78833	3.97714e-06		Lcn2	2.49997	9.44869e-06		Timp1	4.25004	1.80819e-07		Ccl7	7.09833	2.20692e-05
Tgtp1	2.4175	4.32543e-06		Fcer1g	1.98458	9.54321e-06		Gbp10	2.75678	1.81611e-07		LOC100046632	2.75567	2.23632e-05
Serpina3g	3.28611	4.32543e-06		Tgfbi	3.12393	9.69741e-06		Pydc4	3.0773	2.00969e-07		Krtap11-1	3.14633	2.30968e-05
Orm2	2.16333	4.53276e-06		Ptafr	3.76941	9.69741e-06		Ccr5	3.03116	2.17098e-07		Apol9b	4.30333	2.30968e-05
Igtp	2.62528	4.54281e-06		Cfb	4.66682	1.02263e-05		Ifi44	3.09926	2.2213e-07		Il18bp	3.88033	2.3725e-05
Ube2l6	2.59972	4.54281e-06		Cd274	3.32427	1.02263e-05		Ifi27l2a	3.19851	2.3782e-07		1600014C10Rik	2.261	2.37924e-05
Ccl12	4.32639	5.3072e-06		Gm5431	3.82451	1.02263e-05		Irg1	4.68499	2.84147e-07		Prm1	2.66567	2.44056e-05
Ifng	1.99667	5.68049e-06		Gm12250	4.73207	1.03121e-05		Apol9b	3.37966	2.84147e-07		Cd69	2.65233	2.56324e-05
Serpina3m	2.8675	6.7563e-06		Oas3	3.74851	1.04334e-05		Cxcl5	2.72543	2.88612e-07		Tor3a	1.80667	2.60013e-05
Cd69	3.45722	8.30705e-06		Isg20	1.5389	1.04334e-05		Apobec1	1.89526	2.9472e-07		Atf3	2.95967	2.60247e-05
Eif2ak2	2.30111	8.31705e-06		Trafd1	1.57646	1.20494e-05		Slamf7	2.38689	2.9472e-07		Rasl10b	1.50433	2.64083e-05
Rgs1	3.03889	9.06149e-06		Nampt	1.70096	1.2856e-05		C3ar1	2.87921	3.0094e-07		Apod	4.82033	2.68808e-05
Epsti1	2.87944	9.06149e-06		D14Ertd668e	2.34615	1.4058e-05		Il1rn	2.37858	3.0094e-07		Lag3	1.77633	2.68808e-05
Dtx3l	1.99944	9.06149e-06		Ly6i	5.06555	1.4058e-05		Plac8	2.46748	3.32368e-07		Casp4	2.23233	2.84619e-05
Parp12	1.99194	9.06149e-06		Znfx1	1.78828	1.4058e-05		Fcgr4	2.97666	3.34515e-07		Ddx58	2.14133	2.96692e-05
Mt2	3.005	9.07148e-06		Gm4841	2.28473	1.4058e-05		Mlkl	1.9981	3.43786e-07		Slfn3	3.45467	3.31988e-05
Gm11772	1.77889	9.07148e-06		Bst2	2.01409	1.47453e-05		C130026I21Rik	2.17407	3.48179e-07		Sbno2	1.385	3.31988e-05
AI607873	3.09833	9.07333e-06		Tlr9	3.11561	1.47453e-05		Mx2	3.50449	3.58293e-07		C2	1.385	3.35342e-05
Gbp7	1.66889	9.50487e-06		Matn4	-1.54081	1.52277e-05		Gm8989	2.02188	3.78389e-07		Mmp8	3.286	3.35342e-05
Mxd1	1.67639	9.50487e-06		Gm6907	2.47017	1.52277e-05		Ifih1	1.98892	3.99016e-07		Btbd17	1.72667	3.35342e-05
Irgm2	2	9.50487e-06		Cxcl13	5.94164	1.57407e-05		Clec4e	3.39163	4.01285e-07		Scube2	-1.82	3.35342e-05
Gzmb	2.55028	9.67529e-06		Dtx3l	1.78243	1.5757e-05		Bst2	2.12285	4.13911e-07		Apol7a	2.75733	3.35342e-05
Il18bp	3.47722	9.8249e-06		Gbp3	2.18952	1.58435e-05		Cd86	1.91373	4.16151e-07		Hpx	1.973	3.35342e-05
Nt5c3	2.17389	1.01237e-05		Sp100	1.30576	1.58435e-05		Tlr7	1.72816	4.20596e-07		Icam5	1.88067	3.35342e-05
Themis2	2.38556	1.09963e-05		Ccl3	4.47936	1.67654e-05		Gzmb	3.55018	4.20827e-07		Htr7	2.285	3.35342e-05
Ccl3	3.09167	1.16187e-05		Parp10	1.51744	1.77412e-05		Ccl12	3.40028	4.86359e-07		Nfkbie	2.293	3.35418e-05
Ccr5	3.09472	1.20193e-05		Ccr1	2.89704	2.01433e-05		Trim30a	2.56786	4.89562e-07		Retnlb	2.23267	3.47854e-05
Tap1	2.485	1.20193e-05		Ltf	1.86304	2.09897e-05		Nt5c3	1.7673	4.89597e-07		Slfn4	6.39033	3.47854e-05
Agr2	1.93417	1.24099e-05		Trim30c	3.67485	2.14247e-05		H2-T23	2.21151	4.99197e-07		Tlr2	1.985	3.69213e-05
Pyhin1	3.15833	1.28958e-05		Ms4a6c	3.28451	2.14264e-05		Tor3a	1.60544	5.17437e-07		Parp9	2.00267	3.92492e-05
Gpr171	2.62806	1.28958e-05		Creb5	1.10623	2.15396e-05		Vav1	1.71318	5.51358e-07		Ccl12	4.25167	3.95284e-05
Mefv	2.22833	1.28958e-05		Hydin	-1.53053	2.22429e-05		Gm19765	2.49986	5.70609e-07		Ifi35	1.52233	4.01411e-05
Gch1	1.76944	1.30349e-05		Spp1	1.62644	2.35556e-05		Irgm2	2.49082	6.05003e-07		Clec4e	3.90233	4.1298e-05
Trafd1	2.00833	1.30349e-05		Ppp1r14c	-1.40419	2.52307e-05		H2-Q4	1.86621	6.0958e-07		Pde8b	-1.573	4.16346e-05
Ccl8	2.50139	1.30576e-05		Ms4a6d	4.06731	2.52307e-05		Mpeg1	1.85009	6.0958e-07		Slamf9	2.05867	4.16346e-05
Dio2	2.34333	1.30936e-05		Gbp2	2.4921	2.52307e-05		Psmb9	1.69843	6.17514e-07		Cxcl1	3.85667	4.16346e-05
Il1r2	2.35944	1.44035e-05		Plac8	2.61144	2.56514e-05		Ms4a4d	1.64441	6.27754e-07		4833422F24Rik	1.917	4.16346e-05
Trim12a	1.83111	1.6205e-05		Myc	2.33386	2.56514e-05		Lair1	2.18727	6.27754e-07		H2-T9	2.29333	4.24438e-05
Psmb8	1.94694	1.65079e-05		Pdgfd	-1.03031	2.59428e-05		Cxcl13	4.19636	6.27754e-07		Tgfbi	2.32	4.34607e-05
Slfn2	2.41111	1.66304e-05		Slfn2	2.27314	2.63559e-05		BC006779	1.58424	6.28821e-07		Gprasp1	-1.38533	4.40171e-05
Aif1	3.09222	1.66399e-05		Rnf144a	-1.2164	2.9021e-05		I830012O16Rik	3.0372	6.35975e-07		Adar	1.99933	4.42606e-05
Selp	2.47861	1.89177e-05		Stmn2	-1.35008	2.96895e-05		Fcer1g	1.82536	6.35975e-07		F830016B08Rik	2.32267	4.44302e-05
Nfkbie	2.07667	1.89219e-05		Apobec1	1.94128	3.03724e-05		Cd274	3.0817	6.41895e-07		Sectm1b	2.25633	4.44302e-05
Serpina3n	2.04	1.92165e-05		F830016B08Rik	2.54823	3.05405e-05		Trim30d	2.80829	6.41895e-07		A430084P05Rik	2.33867	4.48168e-05
H2-T9	2.03667	2.0035e-05		Nt5c3	2.15428	3.06298e-05		Uba7	1.70708	6.56193e-07		Ccdc86	1.461	4.51577e-05
N4bp1	1.40833	2.03505e-05		9030625A04Rik	2.17775	3.12148e-05		Gm4070	2.29125	6.5946e-07		Cldn2	1.95333	4.51577e-05
5430427O19Rik	1.61306	2.04366e-05		Malt1	1.19872	3.1574e-05		Ifi35	1.69976	6.62346e-07		Gpr171	2.40933	4.55314e-05
Ly6i	3.56389	2.08928e-05		Ccr5	3.20102	3.21808e-05		Slc15a3	1.75489	6.69688e-07		Ccl4	5.14267	4.5879e-05
Fcgr4	2.50333	2.08928e-05		Gm4902	3.57282	3.21808e-05		Znfx1	1.72743	6.82715e-07		Aif1	2.714	4.63765e-05
Ly86	1.97472	2.10728e-05		Nr1d1	-2.98328	3.30427e-05		Siglec1	2.36111	6.82715e-07		Slfn2	2.75233	4.88463e-05
Oas3	2.05972	2.10728e-05		Ms4a6b	2.36376	3.36931e-05		Gvin1	2.35635	6.82715e-07		Ccl11	2.34267	5.31918e-05
Gla	2.06028	2.10728e-05		Fam38b	-1.33173	3.36931e-05		Clec4a3	2.04554	6.86664e-07		Pdcd1	1.84667	5.62961e-05
Slfn10-ps	2.31167	2.10911e-05		Gda	1.81619	3.42029e-05		Tlr13	2.42574	6.96695e-07		Lilrb3	1.97733	5.78103e-05
Gatm	2.47833	2.24373e-05		Ifi27l2a	3.36332	3.44501e-05		Tgtp2	3.45252	7.36276e-07		Mlkl	2.55433	5.79323e-05
H2-Q5	2.57278	2.29773e-05		Gm6548	1.78387	3.82219e-05		Sirpb1a	2.06592	7.37397e-07		Ifi44	3.35233	5.92333e-05
Ifi35	1.47194	2.37008e-05		Gm4951	3.04956	4.0134e-05		Il18bp	2.15087	7.86998e-07		Wnt10b	-1.84767	5.93511e-05
Clec4d	2.51556	2.4524e-05		Nr1d2	-2.07645	4.10553e-05		Steap4	1.87047	7.86998e-07		Trim30d	3.288	6.06295e-05
Slfn9	2.39222	2.49763e-05		Fcgr4	3.0042	4.12704e-05		Tlr9	2.67724	7.99224e-07		Niacr1	2.096	6.06295e-05
Samd9l	1.79667	2.49763e-05		AW011738	1.99839	4.24479e-05		Aif1	2.25896	8.0042e-07		Arid5a	2.038	6.06295e-05
H2-T23	1.4675	2.56278e-05		Olfr56	2.35531	4.33148e-05		Il1b	3.30743	8.16963e-07		Gm4902	3.74633	6.06295e-05
Hepacam2	-1.6875	2.67053e-05		Clec4e	3.24224	4.33148e-05		Xcl1	2.8717	8.16963e-07		Msr1	2.668	6.06916e-05
Trim21	1.54111	2.71305e-05		Pyhin1	3.11855	4.33148e-05		Nfkbie	1.76146	8.18066e-07		Lcn2	3.53833	6.1005e-05
Lgals3bp	2.39778	2.72697e-05		Slfn3	1.87872	4.3336e-05		Slamf8	2.22589	8.26049e-07		S100g	-1.62633	6.12759e-05
Gm16340 /// Ifi203 /// LOC100862473	2.06333	2.72697e-05		Etv1	-1.36857	4.84868e-05		Msr1	2.75582	8.69507e-07		Rab6b	-1.422	6.147e-05
Ms4a4b	1.93639	2.80875e-05		Zfp462	-1.02862	5.16705e-05		Ly86	2.07357	8.79953e-07		Ifih1	2.097	6.30893e-05
Cd300lf	2.44556	2.82119e-05		Setdb2	2.1642	5.46835e-05		9030625A04Rik	1.59606	8.9371e-07		Mrgpra6	1.72367	6.30893e-05
H2-Q4 /// H2-Q6 /// H2-Q8 /// LOC68395	1.56	2.82322e-05		Parp11	1.44142	5.46835e-05		Ccl11	2.39277	9.24e-07		Lama3	-1.53033	6.30893e-05
Hcar2	1.67389	2.82322e-05		Mamdc2	-1.89742	5.46835e-05		H2-T24	1.71549	9.83302e-07		Rsad2	5.01333	6.30893e-05
Hpse	1.84222	2.91593e-05		Cdkn1a	1.87669	5.80206e-05		Rgs16	2.27876	9.87942e-07		Cxcl10	7.58767	6.30893e-05
Pira1 /// Pira11 /// Pira2 /// Pira5 /// Pirb	1.62778	2.91593e-05		Clec3b	-1.15282	5.97073e-05		Klk1	2.25954	9.87942e-07		Mefv	3.901	6.30893e-05
Tap2	1.34833	2.94212e-05		BC023105	1.78057	5.99133e-05		Xdh	1.71268	1.00045e-06		C1qb	2.141	6.30893e-05
Sp100	1.93472	2.94736e-05		Plekhb1	-1.34506	6.01507e-05		Itgam	1.91395	1.01561e-06		Thbs3	-1.43867	6.3451e-05
Csf2	1.26694	2.99864e-05		Tmem100	-1.04907	6.1368e-05		Sp100	1.61274	1.02042e-06		Nampt	1.40567	6.49625e-05
Clec4e	3.18583	3.06726e-05		Sirpb1a	2.49252	6.44995e-05		Cpm	-1.35729	1.25298e-06		Morc1	1.24167	6.58541e-05
Nmi	1.58139	3.11579e-05		2610028H24Rik	-1.33638	6.50602e-05		Cd180	1.8772	1.26553e-06		Rgs1	3.00233	6.67407e-05
Batf2	1.34361	3.15967e-05		Apol9b	3.75167	6.50602e-05		Ch25h	3.19743	1.29489e-06		Scgb1c1	-1.23367	6.70612e-05
Pml	1.88444	3.17214e-05		Gp49a	3.71554	6.60039e-05		Pld4	1.73937	1.29513e-06		Parp14	1.72033	6.70612e-05
Parp9	2.07278	3.23275e-05		Cxcl16	1.74377	6.6684e-05		Daxx	1.99495	1.29513e-06		Cep70	-1.15567	6.70612e-05
Zufsp	1.34278	3.27526e-05		Glrx	1.25057	6.71268e-05		Phf11	2.88124	1.29513e-06		Lgals3bp	2.83533	6.83368e-05
AW011738	1.54	3.32786e-05		Agphd1	-1.07957	6.75035e-05		Psmb10	1.54412	1.30295e-06		Dtx3l	2.003	6.83499e-05
Mmp3	1.86389	3.32786e-05		Lilrb3	2.06218	6.75035e-05		I830127L07Rik	1.7792	1.34332e-06		Fgl2	1.40467	7.04003e-05
Tor3a	1.40722	3.32786e-05		Pydc4	2.80919	6.97799e-05		Nr4a3	1.54064	1.35707e-06		Ccl2	7.13667	7.04003e-05
Milr1	2.345	3.32892e-05		Clec4a1	2.41699	7.05564e-05		Ctsw	1.82705	1.36331e-06		Klhdc8b	-1.28133	7.17843e-05
Parp11	1.7	3.35235e-05		Mlkl	2.46307	7.05564e-05		Ddx58	1.57636	1.38209e-06		Stmn2	-1.524	7.24276e-05
BC147527	2.50444	3.39421e-05		Igtp	2.94874	7.05564e-05		Dtx3l	1.7784	1.38356e-06		Plekha4	2.10267	7.31055e-05
Ddx4	2.51889	3.51295e-05		Samhd1	1.14339	7.05564e-05		Trafd1	1.51943	1.38722e-06		Rgs16	3.35967	7.35508e-05
H2-D1 /// H2-K1 /// LOC101056305	1.29167	3.51295e-05		Slfn5	1.24525	7.25672e-05		Tlr1	1.75302	1.41177e-06		Gpr84	4.48767	7.35508e-05
Gbp8	2.39222	3.54078e-05		Slc23a1	-1.33204	7.25672e-05		Ccl4	2.29715	1.44433e-06		Cdh16	-1.37233	7.35508e-05
Gm4070 /// Gvin1	1.63222	3.58518e-05		Dck	2.07238	7.32015e-05		H2-K1	1.48589	1.47168e-06		Ctss	1.69933	7.35508e-05
Ubd	2.82528	3.9451e-05		Socs3	2.02996	7.32015e-05		Lgals3bp	1.97871	1.47168e-06		A530064D06Rik	3.49667	7.35508e-05
Cd244	1.43389	3.9451e-05		H2-Q7	1.25356	7.32015e-05		Parp14	1.75867	1.47168e-06		Hmcn1	-1.27967	7.35508e-05
Pim1	1.68833	3.9451e-05		Clec7a	2.10552	7.34302e-05		BC023105	2.4259	1.4778e-06		Csprs	2.71167	7.35508e-05
Ido1	2.43833	3.9451e-05		F3	2.15742	7.35604e-05		Gp49a	2.81359	1.4778e-06		4933432I03Rik	1.665	7.35508e-05
D17H6S56E-5	1.25111	3.95996e-05		Fcgr3	1.50208	7.50295e-05		Clec7a	1.56333	1.48735e-06		Ogfr	1.30733	7.40211e-05
Psmb10	1.54278	3.95996e-05		Smad7	-1.28268	7.70413e-05		Cxcl11	3.58498	1.52652e-06		Mitd1	1.52467	7.40211e-05
Car13	2.41667	3.95996e-05		Cyp2s1	-1.26489	7.70662e-05		Il10ra	2.12085	1.53321e-06		Pnp2	1.77067	7.40211e-05
C3ar1	3.01139	3.97418e-05		Mndal	1.9071	7.76217e-05		Cd69	2.79851	1.55155e-06		Slfn1	3.51933	7.65244e-05
Cd40	1.86722	4.10472e-05		Gbp7	2.12051	7.87206e-05		Coro2a	1.4597	1.55155e-06		Cd209c	-1.634	7.65244e-05
Sap30	1.57306	4.22613e-05		Plau	2.46007	8.01446e-05		Tcirg1	1.52177	1.55711e-06		A930001A20Rik	-1.972	7.65244e-05
Irf5	1.19111	4.25498e-05		Ifi203	1.68651	8.06262e-05		Gbp8	2.61684	1.6841e-06		A530032D15Rik	2.228	7.65244e-05
Ccr1	1.87417	4.27621e-05		Ctss	1.95351	8.30285e-05		D14Ertd668e	2.36165	1.69262e-06		Lair1	1.452	7.65244e-05
Klra7	2.16583	4.31264e-05		Dhx58	2.80713	8.30285e-05		Klrk1	2.1933	1.69262e-06		Ly86	1.93433	7.65244e-05
Ifitm6	2.725	4.41244e-05		H2-Q4	2.08482	8.30285e-05		Pim1	1.57236	1.71412e-06		Gbp5	3.348	7.72358e-05
G530011O06Rik	2.84111	4.48308e-05		H2-T24	1.34662	8.30285e-05		Gm7609	1.42115	1.76674e-06		Cpm	-1.41867	7.788e-05
Parp14	2.07444	4.623e-05		Igsf10	-1.30584	8.44795e-05		AB124611	1.66472	1.78329e-06		E030044B06Rik	-1.603	7.788e-05
Gm14085 /// Slc28a2	2.29861	4.6564e-05		Scn3b	-1.10179	8.44795e-05		Pml	1.36082	1.79112e-06		Cxcl13	4.92067	7.7946e-05
Apobec3	1.23667	4.77604e-05		H2-T22	2.23777	8.53496e-05		Ogfr	1.39651	1.795e-06		Cldn4	1.70967	7.98593e-05
AW112010	1.51306	4.77604e-05		Aplnr	-1.68786	8.86228e-05		Plau	1.65095	1.90461e-06		Xcl1	2.585	7.98593e-05
Ch25h	2.64222	4.77604e-05		Epsti1	3.03127	8.86228e-05		Lrrc25	1.52552	1.93576e-06		D0H4S114	-1.572	8.01558e-05
Mitd1	1.73111	4.82449e-05		Odf3b	-1.11504	9.04736e-05		Sp110	1.78874	2.03792e-06		Trim12a	1.445	8.12212e-05
Wfdc17	1.88833	4.89364e-05		Lgals3bp	1.96762	9.12838e-05		Il6	3.78914	2.13984e-06		Ids	-1.07533	8.14493e-05
Slamf7	2.51444	4.89364e-05		Mitd1	1.71466	9.21358e-05		Clec4a1	2.14963	2.13984e-06		Aox3	-1.459	8.19466e-05
Hsh2d	2.22417	4.94331e-05		Atp6v1c2	-1.54348	9.25474e-05		Ms4a7	1.87959	2.1934e-06		Mgat4a	1.59133	8.23646e-05
2310014L17Rik	1.42722	4.96617e-05		LOC100862132	2.64014	9.25474e-05		Lcn2	1.70394	2.2235e-06		Gm6904	1.918	8.32903e-05
Steap4	1.76278	5.14278e-05		Synm	-1.29692	9.4892e-05		Ccr1	2.11651	2.2235e-06		A630012P03Rik	2.54233	8.37642e-05
Basp1	1.61889	5.19143e-05		Ddx58	1.70254	9.4892e-05		Tmem106a	1.86575	2.24652e-06		Aoah	2.59467	8.37642e-05
Atrip /// Trex1	2.65944	5.19143e-05		D730005E14Rik	1.68969	9.53575e-05		Lpxn	1.75659	2.32521e-06		Cd86	1.473	8.42216e-05
Ppa1	1.88194	5.51753e-05		Fgl2	1.79429	9.59032e-05		Adar	1.35526	2.32521e-06		Sectm1a	2.81733	8.63183e-05
Tlr13	2.10556	5.53701e-05		Tlr8	1.1551	9.99053e-05		H2-Q7	1.43769	2.34586e-06		Myd88	1.68533	8.63183e-05
Igsf6	1.98139	5.54371e-05		Clec4a3	2.16689	9.99589e-05		Gbp7	1.8813	2.35217e-06		Ccdc129	-1.84033	8.63183e-05
Ddx58	2.03889	5.54371e-05		Tlr13	2.83432	0.000104334		Zbtb16	2.60378	2.35217e-06		Hsh2d	2.22467	8.69831e-05
Mmp8	1.37389	5.54371e-05		Nlrc5	2.45189	0.000107234		Tmem173	1.69578	2.38572e-06		Evi2a	1.773	8.80759e-05
B430306N03Rik	2.2125	5.78095e-05		Adcy8	-1.37072	0.000107234		Car13	1.58046	2.49287e-06		Naip2	1.83633	8.80958e-05
Dusp2	1.39722	5.88154e-05		Gm19765	2.24406	0.000108965		Fam26f	2.58696	2.49287e-06		Ccr5	3.14867	8.80958e-05
Fgl2	1.365	5.95555e-05		Ms4a14	1.30415	0.000108965		Tnfrsf9	1.72864	2.54485e-06		Hk3	2.56	8.80958e-05
Lgals9	1.87222	5.98321e-05		Sirpb1b	3.14058	0.000108965		Gm4902	3.66662	2.56574e-06		Gch1	1.96533	8.80958e-05
Aldh1b1	1.50889	6.02494e-05		Scgb1c1	-1.64551	0.000113503		Casp1	1.57476	2.56574e-06		Dapp1	1.184	8.80958e-05
Trim12c	1.29806	6.37596e-05		Gadd45g	1.9222	0.00011427		Rgs1	2.29017	2.65665e-06		BC094916	2.712	8.80958e-05
Casp1	1.61	6.69068e-05		Lcp2	1.73682	0.000115503		Gpr65	2.11599	2.69215e-06		Osbpl6	-1.969	8.82506e-05
Klra2	2.02389	6.73683e-05		Psmb8	1.7723	0.000116063		Rnf19b	1.37143	2.76586e-06		Irs1	-1.28467	8.82981e-05
Marcksl1	1.74722	6.82528e-05		Reep6	-1.10662	0.000117321		Fgr	1.85642	2.76586e-06		Tnfaip6	1.63133	8.82981e-05
Ecm2	-1.29389	6.836e-05		Lox	1.24122	0.000118741		Hcls1	1.57123	2.7899e-06		C3ar1	2.35467	8.82981e-05
Klrk1	2.39556	6.836e-05		Mpeg1	2.14247	0.000120723		AI607873	2.79073	2.7899e-06		Lgals9	1.97267	8.88045e-05
Nfil3	1.46111	6.836e-05		Ifit2	2.45161	0.000120723		Clec5a	1.94902	2.79544e-06		Cd72	3.31667	8.89683e-05
Irf9	1.33278	6.92372e-05		Tlr7	1.81236	0.000120723		Clec12a	1.5452	2.79544e-06		4930579G22Rik	-1.02833	8.89683e-05
Gp49a /// Lilrb4	2.5125	7.32492e-05		4930451C15Rik	-1.43762	0.000120723		Saa4	3.3164	2.79544e-06		Cxcl2	3.354	9.104e-05
Psmb9	1.67917	7.33999e-05		Atp8b4	1.91561	0.000120723		Ccl5	2.29671	2.79544e-06		Snx20	1.81767	9.104e-05
Aida	1.12	7.41849e-05		Gpr65	2.20507	0.000123069		H2-Q6	2.23874	2.92558e-06		Sec14l3	-1.328	9.104e-05
Tifa	1.86667	7.54825e-05		Gbp4	1.31638	0.000123069		Selplg	1.43689	2.95161e-06		LOC547349	1.87967	9.10555e-05
Ifitm3	1.18389	7.77398e-05		Gm7609	1.13744	0.000123069		Csf3r	1.74367	3.0637e-06		Mov10	1.491	9.11247e-05
Il10ra	1.99444	7.77398e-05		Mxd1	2.05804	0.000123069		Irf9	1.22371	3.13676e-06		Nt5c3	1.62933	9.5333e-05
Xcl1	1.48889	7.80552e-05		Rnf149	1.82157	0.000123069		A530064D06Rik	3.27909	3.14978e-06		Pstpip1	2.17933	9.70075e-05
Pnp /// Pnp2	1.59278	7.84084e-05		Serpina3m	3.46122	0.000123069		Setdb2	1.6029	3.35345e-06		AW112010	1.808	9.71041e-05
Tnfaip2	1.51111	7.84084e-05		Cdhr3	-1.85703	0.000123069		Ifi203	1.74748	3.35365e-06		4930573O21Rik	-1.21733	9.83767e-05
Nlrc5	2.85083	7.93985e-05		Fst	1.93921	0.000123367		F830016B08Rik	2.25606	3.44249e-06		Myl4	-1.229	9.92693e-05
Nampt	1.07333	7.98093e-05		Tap1	2.06964	0.000123464		Sema4d	1.46337	3.48511e-06		Igfbp3	-1.963	9.92693e-05
Ifnb1	2.06333	8.29824e-05		Gbp9	1.39572	0.000127294		Ms4a4a	2.48447	3.59954e-06		Daxx	1.987	9.92693e-05
Mx2	2.255	8.29824e-05		Msr1	3.41605	0.000127638		Ptpn6	1.42339	3.61352e-06		I830077J02Rik	1.968	0.000102347
Slc39a14	1.76444	8.42544e-05		Steap4	2.85488	0.000127638		C1qb	1.83722	3.64346e-06		Gatm	1.55133	0.000103814
Il15	1.30139	9.24537e-05		Siglec1	3.0564	0.000127638		Serpina3n	2.05813	3.64346e-06		Gm2511	1.62033	0.000103814
Irf1	1.12194	9.24994e-05		Pcdh12	-1.3466	0.000128207		AW011738	1.67141	3.64346e-06		Pon1	-1.78733	0.00010426
Csf1	1.44667	9.25701e-05		Tppp3	-1.40373	0.000128547		Sirpb1b	2.2087	3.69188e-06		Ptafr	3.32367	0.000104391
Pcgf5	1.18944	9.25701e-05		LOC100036513	1.00716	0.000128547		Ppa1	1.44786	3.71444e-06		2610318N02Rik	1.517	0.000106864
Ccdc86	1.34944	9.25701e-05		Tnc	2.34462	0.000129483		Spon2	-1.32337	3.77299e-06		Noxo1	1.29067	0.000106864
Apol7a	1.46056	9.39717e-05		Irgm2	2.0718	0.000132347		Nampt	1.68501	3.83388e-06		Eif2s3y	-1.41267	0.000106864
Nrcam	-1.55667	9.39717e-05		Tnxb	-1.64612	0.000134091		Upk3b	-1.22019	3.83388e-06		Prss22	1.60867	0.000106879
1600014C10Rik	1.74944	9.39717e-05		Samd9l	1.14346	0.000134091		Bcl2a1d	1.17038	3.91012e-06		Vav1	1.96167	0.000107655
Stat2	2.415	9.39717e-05		Nipa1	-1.35374	0.000134624		Csf2rb2	1.76787	3.99704e-06		Fcgr2b	1.53567	0.000107655
Gm13889	1.12583	9.81147e-05		Fam49b	1.15499	0.000136097		Klra2	1.96651	4.26372e-06		Cd300lf	2.29267	0.000107655
B4galt5	1.30444	9.88827e-05		Clec12a	1.8343	0.000136333		Pla1a	2.27149	4.26372e-06		H2-Q8	2.838	0.000107655
AI662270	1.26944	9.94654e-05		Arg1	2.19777	0.000138661		Mthfd2	1.41861	4.31652e-06		Pdyn	1.85033	0.000109047
Lpxn	2.05194	9.96074e-05		Evi2a	1.77836	0.000141551		Serpina3f	3.44583	4.35134e-06		Tor1aip1	1.551	0.000112245
Ass1 /// Gm5424	1.35556	0.000101926		LOC100861753	1.73758	0.000144737		Cd53	1.65573	4.35134e-06		Epsti1	1.66733	0.000112774
Mpeg1	1.15833	0.000101926		Plin2	1.57286	0.000145667		Cyp7b1	1.99492	4.3707e-06		Gm11428	2.63633	0.000112811
Tnfaip6	2.08444	0.000101926		Dnahc9	-1.10569	0.00014756		F3	1.37491	4.497e-06		Alpl	2.59333	0.000113252
Clec4a3	1.74889	0.000101989		Car8	-1.21276	0.000150573		Parp10	1.59336	4.76073e-06		Tifa	1.85567	0.000113395
2310031A07Rik	1.91889	0.000103739		Dnahc5	-1.97685	0.000153438		Vcan	1.79014	4.76073e-06		Fosl1	1.925	0.00011622
Tapbp	1.2175	0.000103739		Fyb	1.56733	0.00015472		Dck	1.89156	4.78121e-06		Ogn	-1.191	0.000118104
Sell	1.95	0.000104528		Oas1b	2.31422	0.000156678		D17H6S56E-5	1.3258	4.81247e-06		Bex2	-1.603	0.000118692
9530053H05Rik	1.60944	0.000104986		Gm5918	-1.17441	0.000158049		Sprr1a	2.4196	4.81247e-06		Mdh1b	-1.13267	0.000119379
Arid5a	1.48111	0.000105521		H2-K1	1.28809	0.00016094		Gatm	2.06116	4.81815e-06		Inhba	2.32867	0.000119925
Sectm1a	2.45111	0.00010696		Maob	-1.55865	0.000162017		Csf2	1.77735	4.88464e-06		Mamdc2	-1.41433	0.000119925
Uba7	1.72222	0.000108422		Igfbp3	-2.23246	0.000175177		Eif2ak2	1.64626	5.04459e-06		Csf2rb2	1.955	0.000119943
Tdrd7	1.15111	0.000108422		Vav1	1.91722	0.000175177		Serpine1	1.2934	5.11114e-06		Sirpb1b	2.389	0.000119943
Bcl3	1.585	0.000108422		Casp1	1.81016	0.000180754		G530011O06Rik	2.92646	5.29761e-06		Vnn3	1.16267	0.000119943
Pla1a	1.96389	0.000108422		Cpm	-1.34385	0.000181006		Ankrd1	1.45125	5.29761e-06		Il12rb1	1.85033	0.000119943
Pla2g7	2.53444	0.000110627		Slfn8	2.95828	0.000184385		Selp	1.9433	5.29761e-06		Gm10839	2.49833	0.000120493
Cd53	1.33	0.000114207		Ppil6	-1.51463	0.000187399		Trim21	1.45269	5.31058e-06		Wfdc16	-1.912	0.000121123
Ncoa7	1.22611	0.000114772		Cd14	2.02803	0.000187399		Il2rb	1.89242	5.31626e-06		Rasa4	1.88133	0.000122192
Alpl	1.17083	0.000115002		Bcl2a1b	1.99425	0.000193173		Ddx39b	1.23916	5.59353e-06		Ppp1r9a	-1.01967	0.000124129
S100a9	2.76833	0.00011528		Gm10499	1.13222	0.000194205		Tnfaip3	1.52467	5.59353e-06		Samd9l	1.78333	0.000124326
Pnp	1.40083	0.000118092		Rgs1	2.4747	0.000194803		Sh3bp2	1.47782	5.59353e-06		C1rb	1.402	0.00012546
Slc15a3	2.30278	0.000122152		Myd88	1.62958	0.000194867		Slc7a8	1.97583	5.63198e-06		E330016A19Rik	1.521	0.00012646
Znfx1	2.21556	0.000122152		Wfdc1	-1.72696	0.000198729		Gzma	1.71639	5.73744e-06		Tppp3	-1.428	0.000127485
H2-T24	2.18278	0.000122219		Tspan12	-1.02485	0.00019926		Ncf4	1.47222	5.73744e-06		Serpina3g	2.86367	0.000127485
Lcn2	1.50833	0.000123863		Gvin1	1.66792	0.00019926		B430306N03Rik	1.74353	5.86349e-06		B430316J06Rik	-1.17033	0.000127903
Gda	1.26917	0.000124033		Tmprss2	-1.28561	0.000201931		9330175E14Rik	1.58667	5.96663e-06		Rnf149	1.07633	0.00012855
Pigr	1.34	0.000124324		Cxcl11	2.82966	0.000203114		Fgl2	1.51924	6.02876e-06		Slc35f3	-1.33667	0.00012855
Cd52	1.63194	0.000125191		Gbp10	2.24098	0.000203179		C1qc	1.53648	6.0317e-06		Maob	-1.13	0.000128698
Gm20559	1.98583	0.0001253		Cd177	2.36709	0.000205884		Ms4a4b	2.0368	6.0317e-06		Morn5	-1.07367	0.000128698
Tor1aip2	1.06333	0.000130874		Mt1	1.60335	0.000206172		Wars	1.09916	6.13958e-06		Irgm1	2.53567	0.000129377
Tapbpl	1.24139	0.000133506		Angptl4	2.50494	0.000206842		Sectm1b	1.90894	6.20769e-06		Tmem132c	-1.257	0.000129377
Chl1	2.72944	0.000135046		Naa20	1.14284	0.000214102		Fcgr2b	1.7656	6.3257e-06		Bst2	2.60867	0.000129377
Evi2a	1.92333	0.000137131		Ptger4	1.67586	0.000214102		Retnla	3.17542	6.3257e-06		Cd200r4	1.20133	0.000129377
Daxx	2.26194	0.00013987		Cyp7b1	2.45501	0.000217105		Plek	1.29071	6.3257e-06		AW011738	1.99733	0.000129377
Havcr2	1.33917	0.000143453		Gm4070	1.72238	0.000217105		Il21r	1.75111	6.35879e-06		Syne2	-1.04567	0.000129377
Cd72	2.88333	0.000145263		Nfkbie	1.9139	0.000220475		Pla2g7	2.26206	6.38548e-06		Slc4a5	-1.52267	0.000129377
Osbpl6	-1.00333	0.000145477		Tnfaip3	1.95906	0.000220475		Dnase1l3	2.26143	6.40749e-06		Isg20	1.882	0.000129377
Il1b	3.07667	0.000149843		Adar	1.27655	0.000223263		Slamf9	1.58324	6.51865e-06		Mrgpra2a	3.14333	0.000129377
Rnf114	1.01417	0.000154738		Il6	3.93896	0.000230353		Igsf6	1.90809	6.52519e-06		Plk5	-1.61333	0.000129802
Bex6	1.95722	0.000157828		Trim30d	3.19208	0.000231861		Lgmn	1.12521	6.68693e-06		Gp49a	3.29133	0.000129802
C1ra	1.10833	0.000165756		Il1f9	1.81626	0.000232619		Cd80	1.69176	6.72949e-06		Matn4	-1.15633	0.000130391
Zfp704	-1.01556	0.000165871		Cxcr2	2.46393	0.00023408		Batf2	1.39127	6.72949e-06		Fam46a	1.762	0.000130668
Tex15	-1.03528	0.00016766		Osmr	1.19348	0.000238844		Pik3ap1	1.29795	6.7504e-06		Gm8995	2.00733	0.000130706
Il4i1 /// Nup62-il4i1	1.39833	0.000172291		Il1rn	2.32626	0.000240458		Tarm1	3.16099	6.75534e-06		Gm5431	1.97467	0.000130706
Gadd45g	1.35778	0.000176331		Aoah	2.52482	0.000242429		Fyb	1.46048	6.76266e-06		H2-T10	2.42667	0.000130706
Psme1	1.15472	0.000176331		Lair1	2.36373	0.000242429		Tnfrsf1b	1.53224	6.78493e-06		Ncoa7	1.14433	0.000132745
Ly9	1.415	0.000178534		Gbp11	1.82537	0.000243663		Ptger4	1.2179	6.78493e-06		Herc6	2.47	0.000132931
Adam22	-1.10028	0.00017891		Cd53	1.69909	0.000243663		Evi2a	1.48614	6.8273e-06		Dcdc2a	-1.426	0.000132952
Samsn1	1.33389	0.000179817		Map3k8	1.20391	0.000243663		Gm8995	2.04144	6.8273e-06		Casc1	-1.02267	0.000134557
Cd177	2.34167	0.000179817		Ccr2	1.83796	0.000243663		Lst1	1.82179	6.92465e-06		She	-1.083	0.000134557
Retnla	1.28417	0.000179817		Sass6	1.21501	0.00024857		Cyth4	1.4202	6.96671e-06		Tmem106a	1.60767	0.000134557
LOC100038947 /// Sirpb1a /// Sirpb1b	1.76444	0.000179817		Cyp4f18	2.43147	0.00024857		B4galt5	1.18761	7.02062e-06		Tcstv3	2.385	0.000134557
Cmtr1	1.04889	0.000180179		Bcl2a1d	1.98484	0.00024857		Slc7a10	-1.24744	7.02062e-06		Uhrf1	1.34233	0.000134557
Map3k8	1.12111	0.000185057		D17H6S56E-5	1.275	0.00024857		Tyrobp	1.27298	7.29836e-06		Ccl3	3.96133	0.000134557
Sfrp1	1.62917	0.000185057		Neurl3	1.40445	0.0002524		Tor1aip1	1.06582	7.34102e-06		Parp10	1.31567	0.000135532
Sema4d	1.51833	0.000189214		Il1a	2.46109	0.000258892		Psmb8	1.82953	7.39643e-06		Pnp	1.625	0.000135532
Rnf213	2.69833	0.000189214		Ly6c2	2.71894	0.000261401		Ly9	1.42544	7.43631e-06		Rab20	1.60267	0.00013555
Colgalt2	-1.03778	0.00019206		Rassf3	-1.15187	0.000266262		Nmi	1.47059	7.49546e-06		Cstb	1.266	0.000135638
Cxcl14	1.87194	0.00019206		Gbp8	2.10553	0.000268355		Aim1	1.27256	7.49546e-06		Ces1e	-1.52633	0.000135808
Apobec1	1.74972	0.000193757		Tbc1d30	-1.52355	0.00026924		Lgals9	1.5555	7.49546e-06		H2-T24	1.297	0.000136102
Tlr1	2.745	0.000195523		Tor3a	1.661	0.00026995		Gm9733	2.1775	7.5542e-06		Ccl9	2.075	0.000136102
Slc26a4	1.82778	0.000195557		Cmtm8	-1.01884	0.000270493		Cd300lf	1.77789	7.5542e-06		Myl7	-1.00833	0.000136102
Ctps	1.22833	0.000195739		Hpse	1.67989	0.000272872		Nckap1l	1.11144	7.67616e-06		Slc7a5	1.15667	0.000139338
Fam46a	1.46472	0.000200264		Tdrd7	1.03082	0.000273046		Pdcd1lg2	1.45623	7.77195e-06		Vmn1r65	1.78867	0.000139338
Gmppb	1.11667	0.000200264		Sfpi1	1.40357	0.000273776		Casp4	2.26738	7.77195e-06		Rftn2	-1.34067	0.000139338
Ly6e	1.24333	0.000200264		Epha1	-1.29154	0.000274152		Niacr1	1.74031	7.80133e-06		Csf2rb	1.775	0.000140707
Tifab	1.92056	0.000200264		Car13	2.4777	0.000274152		Sectm1a	2.31721	7.81113e-06		Litaf	1.008	0.00014283
Tnf	1.23444	0.000200264		Stfa2l1	3.21329	0.000274771		Arntl	-1.38029	7.83303e-06		Fam125b	-1.20733	0.00014283
Frem2	-1.00333	0.000205392		2410066E13Rik	-1.32046	0.000274771		Cybb	1.35573	7.98297e-06		Espl1	1.20167	0.000143823
Ogfr	1.16444	0.000205777		Efhd2	1.11638	0.000274771		Gm6377	1.51466	8.37553e-06		Pydc4	1.929	0.000143823
Sirpb1a	1.65778	0.000207551		Pik3ap1	1.62688	0.000274771		Cd14	1.34152	8.44057e-06		Fcgr4	2.995	0.000143823
Atf3	2.08778	0.000211457		Gm8979	1.54968	0.000275058		Clec4d	2.17762	8.45612e-06		Pira7	1.56867	0.000144449
Myd88	1.43972	0.000213285		Niacr1	1.98698	0.000277115		Ccr2	1.60221	8.63007e-06		Pycard	1.35833	0.000144449
Pik3ap1	1.43028	0.000216746		Orm1	2.2905	0.000278884		Pcgf5	1.10669	8.71881e-06		Ms4a6b	2.10933	0.000144662
Helz2	1.58389	0.000230768		LOC100505262	-1.07021	0.000280601		Gbp9	1.29841	8.76074e-06		Ch25h	3.06733	0.00014625
Tnfrsf1b	1.39472	0.000230768		Clec4d	3.12504	0.000283791		Gbp11	2.54465	8.76074e-06		Adam22	-1.59733	0.000148019
2810455D13Rik	-1.10389	0.000230768		Nmi	1.43242	0.000285541		Scube2	-1.31439	8.85002e-06		Spic	1.90067	0.000148019
Ptgs2	1.93667	0.000240117		Il18bp	1.81741	0.000289365		Rab20	1.1191	8.86419e-06		Ifitm3	2.04	0.000148019
Mb21d1	1.34667	0.000242394		Lgals3	1.09057	0.000289365		Irf1	1.33184	8.90072e-06		Myc	1.59533	0.000149465
Hk3	1.17056	0.00024243		Atf3	2.53545	0.000290252		Gm17757	2.03394	8.94608e-06		Ppa1	1.68167	0.000150329
Smpdl3b	1.3025	0.000248084		Zdhhc1	-1.1831	0.000290803		Npas2	-1.49569	8.94608e-06		Mrgpra2b	3.19833	0.000150329
Lst1	2.59417	0.000248084		Bex2	-1.6414	0.000292501		Lcp2	1.46172	8.94608e-06		Prkcz	-1.18533	0.000150936
Fmo1	-1.00083	0.000255851		Anln	1.03874	0.000292501		Parp11	1.33673	9.2168e-06		Pla2g7	2.74733	0.000153259
Trim34a	1.55028	0.00025635		Trim21	1.42452	0.000295575		Myc	1.28183	9.723e-06		9530036O11Rik	-1.04667	0.000153259
Retnlb	1.05944	0.00025635		Pml	1.39442	0.00029693		Orm1	1.78497	9.82792e-06		Arrb2	1.17167	0.000153829
Gpr18	1.42111	0.000258637		Cd300ld	1.77644	0.000298693		Tlr2	1.59329	9.96387e-06		C130090I23Rik	-1.31933	0.000154122
AB124611	1.91	0.000259124		Tmem173	2.06061	0.000298693		Il1a	1.65387	9.99196e-06		Ptx3	4.37333	0.000154122
Clca1	1.74889	0.000271158		Scn3a	-2.17754	0.000299137		Mov10	1.29454	9.99539e-06		Morn1	-1.02667	0.000154152
Pnpt1	1.33944	0.000279457		Ppa1	1.7949	0.00029968		Cxcl1	2.3682	1.0672e-05		Glt25d2	-1.645	0.000154152
Orm1	2.81111	0.000280005		Gm17757	1.78912	0.000303816		Gpr171	1.4014	1.09855e-05		Diras2	-1.194	0.000154152
Rab20	1.46944	0.000280005		Bcl3	1.66888	0.000312981		Mitd1	1.35969	1.09855e-05		Gm11127	1.36767	0.000154152
Pald1 /// Thbs1	1.20083	0.00028741		Mafb	1.99043	0.000314551		Cttnbp2	-1.49348	1.09998e-05		Lrrc17	-2.219	0.000154152
Cyp4f18	2.32778	0.00028747		Agr2	1.33686	0.000320507		Ptprc	1.26239	1.10863e-05		Fam13a	-1.26233	0.000154152
Samhd1	1.69861	0.000289617		Atp2a3	-1.10213	0.000322564		Apobec3	1.28609	1.10921e-05		A530099J19Rik	-1.26867	0.000154152
C130026I21Rik /// LOC102634528	1.34528	0.000289617		Cd69	2.49031	0.000325299		Gm1966	1.93242	1.12788e-05		Wfdc10	-1.67033	0.000154613
Thbs1	1.51472	0.000292161		Slc11a1	2.03177	0.000326804		Slc39a14	1.49634	1.14144e-05		Kcnu1	-1.04333	0.000154613
Fyb	1.945	0.00030529		Sult1d1	-1.49951	0.000328353		9930111J21Rik2	1.35881	1.14714e-05		Gbp3	2.629	0.000154613
C2	1.05944	0.000308321		BC013712	2.21116	0.000330896		Lama3	-1.19194	1.15109e-05		Etv1	-1.11933	0.000154613
Parp10 /// Plec	2.02806	0.000311925		Cybb	1.70864	0.000332531		Hspa1b	1.66094	1.19837e-05		Tspan12	-1.249	0.000154613
Itga8	-1.00194	0.000314725		Litaf	1.01892	0.000332602		Mrc2	-1.12338	1.26551e-05		Setdb2	1.68933	0.000154613
Fcer1g	1.67361	0.000316682		Clec5a	2.63123	0.000333155		BC147527	3.04354	1.29851e-05		Lpxn	2.13333	0.000155886
Runx3	2.4125	0.000316682		Gm19951	2.19633	0.000338992		Per2	1.16561	1.29851e-05		Sfrp1	1.431	0.000155886
Rnf19b	1.24972	0.000316682		Ankrd44	-1.00352	0.000338992		Mmp3	1.81299	1.33881e-05		4833411C07Rik	-1.296	0.000155886
Chrna7	1.70111	0.000320963		Lpcat2	1.38855	0.000340652		F10	1.77713	1.34516e-05		Tmem173	1.93667	0.00015622
Ccrl2	1.06556	0.000320963		Wscd1	-1.1446	0.000340652		LOC100861753	1.59001	1.35215e-05		Metrnl	1.30267	0.00015622
Tcstv3	1.39306	0.000324941		Sp110	1.368	0.00034378		Mafb	1.52171	1.37488e-05		C1ra	1.51533	0.00015622
Upp1	1.31611	0.000325427		Tnfrsf19	-1.19007	0.000350217		Mxd1	1.44335	1.37488e-05		Pcdhac2	-1.25167	0.00015622
Bid	1.04611	0.0003288		Lama3	-1.53211	0.000351469		Myo1f	1.16448	1.39177e-05		Tmem14a	-1.42133	0.000156352
Pstpip1	1.77722	0.000331067		Nuak2	1.11182	0.00035277		Cd68	1.75604	1.43226e-05		Fam161a	-1.69533	0.000156352
Psme2 /// Psme2b	1.12167	0.000331067		Trim12a	1.29415	0.000357105		Pyhin1	3.41195	1.4414e-05		Ccl19	2.084	0.000156352
Sectm1b	1.64611	0.000336394		B4galt5	1.26718	0.000357458		Gm6548	1.23869	1.46238e-05		Aass	-1.76933	0.000156527
Cyp2a4 /// Cyp2a5	-1.33556	0.000347966		Myo5b	-1.01374	0.000357619		Nkg7	1.41996	1.51978e-05		Gm4841	3.035	0.000156765
Gm13139	1.12889	0.000352535		Pcolce2	-1.30334	0.000357619		Tapbpl	1.08827	1.5235e-05		Parp12	1.93533	0.000157974
Sh3bp2	1.82806	0.000352535		Cxcl3	3.08142	0.000364507		Amica1	1.42332	1.54219e-05		Mmp3	1.89967	0.000157974
Cybb	1.13528	0.000353764		AW112010	1.54602	0.000366699		Ikbke	1.17893	1.55399e-05		Tor1aip2	1.14333	0.00015938
C1qtnf2	-1.265	0.000358364		5330417C22Rik	-1.42855	0.000372981		Irf8	1.11299	1.55399e-05		Gm4013	-1.03667	0.000160276
Gm10693 /// Gm14548 /// Lilra6 /// Pira1 /// Pira11 /// Pira2 /// Pira4 /// Pira5 /// Pira6 /// Pira7 /// Pirb	2.27667	0.000374912		4933439F18Rik	-1.03436	0.000377227		Hmcn1	-1.22006	1.55399e-05		D3Ertd751e	-1.17433	0.000160768
Nrep	-1.08583	0.000378411		Clmn	-1.0951	0.000387389		Atp8b4	1.54389	1.55653e-05		Npw	-1.08967	0.000160932
Setdb2	1.62833	0.000379026		H2-T23	1.53113	0.000395523		Samhd1	1.16708	1.55653e-05		Cd84	1.55567	0.000162701
Litaf	1.03556	0.00038257		Ckap4	1.10011	0.00040443		Irf5	1.33147	1.56707e-05		6330439K17Rik	-1.47467	0.000163069
Vav1	1.80556	0.000383419		Mccc2	-1.17187	0.000405206		Zfp462	-1.13416	1.58039e-05		B430306N03Rik	3.83833	0.000163069
Reg3g	1.26	0.000387151		Daxx	1.94542	0.000416571		Hk2	1.3719	1.5893e-05		Mthfd2	1.891	0.000165313
S100a8	2.23917	0.000387151		Ifi35	1.52133	0.000431145		Ube2l6	1.48456	1.6144e-05		Calml4	-1.14567	0.000168714
Tnc	1.73	0.00038785		Ctps	1.83747	0.000431145		4930451C15Rik	-1.18185	1.62664e-05		Tnp2	1.151	0.000169576
2022-03-01	1.33917	0.000403151		Slc7a8	3.34798	0.000438981		Ido1	1.6059	1.65849e-05		Bcan	-2.001	0.000169766
Tgfbi	1.62722	0.000405658		D0H4S114	-1.05066	0.00044661		Acoxl	-1.21729	1.69142e-05		Bdkrb1	2.36733	0.000170085
Cldn4	1.15389	0.000406813		Trib1	1.22795	0.00044661		Fbxw17	1.13601	1.69277e-05		1500012F01Rik	1.15233	0.00017121
Nnmt	1.11194	0.000410175		Cyp39a1	-1.2928	0.000451034		Adap1	1.36318	1.70765e-05		Basp1	1.296	0.000171819
Trim14	1.35222	0.000420583		Ccl9	1.8515	0.000459366		Hk3	1.65762	1.70765e-05		E2f8	1.00333	0.0001736
F10	1.59417	0.000420583		Tor1aip1	1.07287	0.000461545		Pcolce2	-1.04594	1.73307e-05		Nsun7	-1.11933	0.00017891
Procr	1.06917	0.000420583		Mmp8	3.03196	0.000463505		Prdm8	-1.78065	1.76806e-05		Nmi	1.26867	0.000179129
Pirb	1.98611	0.000428529		Sec14l3	-1.46061	0.000475339		Tlr3	1.3833	1.76806e-05		D630004K10Rik	-1.22033	0.000181769
Oas2	2.55917	0.000429845		Rnf19b	1.84016	0.000475682		Trim25	1.07482	1.78292e-05		Bcl3	1.98	0.000184584
Gpr15	1.21222	0.000436507		Tmem106a	2.01336	0.000481762		Gm20024	1.39152	1.80532e-05		Ctps	1.435	0.000184584
Gdf10	-1.13222	0.000442709		Sbno2	1.46667	0.00048763		Socs3	1.52075	1.82823e-05		5430439M09Rik	-1.061	0.000184584
Tlr3	1.39167	0.000454697		Fam111a	1.0945	0.00048763		Trim34a	1.61666	1.85428e-05		2900001G08Rik	-1.42433	0.000184584
1300002K09Rik	1.08083	0.000457781		Gch1	1.62685	0.00048763		Ctps	1.23153	1.87077e-05		1700040L02Rik	-1.09467	0.000184584
Ccl11	1.96722	0.000457781		Clca1	1.81516	0.000492189		St8sia2	-1.16942	1.92905e-05		Tnf	3.406	0.000184584
Ptpn22	1.18111	0.000470858		C1qb	2.66223	0.000499977		Gla	1.11799	1.93991e-05		2210415F13Rik	1.343	0.000184584
Arg1	1.73722	0.000472912		Gpr141	2.12031	0.000500928		Ifitm6	1.38644	1.93991e-05		H2-T23	1.354	0.000185757
Trim34a /// Trim34b	1.50861	0.000483696		C530005A16Rik	-1.42803	0.00051244		Plcg2	1.01551	1.93991e-05		Sh3bp2	1.339	0.000188881
Nfkbiz	1.55361	0.00048981		Gm8989	1.55328	0.000512953		Cxcl16	1.01348	1.98239e-05		Arl15	-1.19033	0.000189107
Ptpro	1.57417	0.00048981		Ptgs2	1.7631	0.000512953		Ifi30	1.14736	1.98239e-05		Iigp1	2.19933	0.000190076
Pilrb1	1.29083	0.000490891		Slc7a10	-1.57136	0.000518601		Gbp4	1.99116	1.98239e-05		Cd274	2.898	0.000190076
Mt1	1.27028	0.000492378		Eef1e1	1.13643	0.000518601		Hap1	1.21704	2.02805e-05		Ttc28	-1.111	0.000190076
Ccl9	1.17417	0.000495505		Mmp15	-1.37797	0.000518601		Aoah	2.01569	2.03932e-05		Iapp	1.468	0.000190076
Scn3a	-1.65444	0.000496095		Serpine1	1.76707	0.000526238		Hpse	1.58843	2.05212e-05		Prdm6	-1.06	0.000190076
H60c	-1.06611	0.000496095		Snora3	-1.86235	0.000527597		Cyp4f18	1.64004	2.08328e-05		D13Ertd608e	2.46367	0.000190076
Xdh	1.105	0.000504506		1810010H24Rik	-1.2885	0.000533008		Unc93b1	1.23362	2.08328e-05		C1qa	2.07067	0.000191693
Cttnbp2	-1.62528	0.000504506		Zufsp	1.32402	0.000538791		Gpr31b	1.4037	2.08328e-05		Mab21l3	1.45267	0.000192577
Tnfsf14	1.09389	0.000504506		Gla	1.38747	0.000545337		Gfra2	-1.30958	2.0858e-05		Ube2l6	1.794	0.000193952
Rab6b	-1.00444	0.000505114		Reps2	-1.21195	0.000548983		Bex2	-1.51619	2.13455e-05		Areg	2.76033	0.000193952
Pgr	-1.20889	0.000510032		Chad	-2.36291	0.000549114		Gsdmd	1.05353	2.46777e-05		Socs3	2.433	0.000193952
Fcgr2b	1.39	0.000548067		Phf11	2.03723	0.000549114		Mefv	1.46402	2.46777e-05		Fermt3	1.24833	0.000194198
C1qb	1.85222	0.000553029		Gsdmd	1.02865	0.000550633		Arid5a	1.15032	2.475e-05		Lrrc25	3.145	0.000196058
Tubb6	1.0325	0.000558152		Ccl4	2.50103	0.000550946		Tnip3	2.49563	2.54479e-05		Plk3	1.40967	0.000196058
Slc7a8	1.245	0.000563505		Hmcn1	-1.44808	0.000550946		Fam49b	1.20838	2.547e-05		Irf9	1.236	0.000197802
Misp	1.28556	0.000563505		Gstz1	-1.0188	0.000550946		5430435G22Rik	1.18974	2.61778e-05		Cyp1b1	1.84967	0.000197802
Scn7a	-1.00861	0.000567086		Naip2	1.69187	0.000553362		Tap2	1.18791	2.62975e-05		Lgi2	1.354	0.000197802
Nmral1	1.17222	0.000567086		Gm1966	1.44222	0.000560213		Gpr84	1.75141	2.66904e-05		Rdm1	-1.242	0.000200513
A730054J21Rik	-1.02417	0.00059873		Slc5a12	-1.54585	0.000560213		E230029C05Rik	1.13791	2.67029e-05		Dync2h1	-1.00867	0.000202014
Tlr7	1.5175	0.000602584		Abi3bp	-1.0326	0.000560948		Tnfaip6	1.48579	2.67482e-05		Ppm1l	-1.13067	0.000202308
Adm	1.12611	0.000607624		St6galnac2	-1.19886	0.000570171		Gch1	1.27903	2.80243e-05		Clec4a1	2.19833	0.000204356
Mamdc2	-1.02944	0.00061006		Pdk4	1.56257	0.000576128		H2-Q5	1.88739	2.80243e-05		Mndal	1.519	0.000204602
Hmox1	1.00889	0.00061006		Ptprc	1.12173	0.000576128		Ifitm3	1.40873	2.80541e-05		Znfx1	1.44367	0.000204839
Cpm	-1.33361	0.000612368		Mthfd2	1.89715	0.000580348		Gm19585	1.35975	2.84854e-05		Muc4	1.16567	0.000204839
Serpine1	1.40056	0.000626944		Sod2	1.29942	0.000580348		Plekha4	1.03929	2.86018e-05		Mcoln2	2.029	0.000204839
Naip2	1.43722	0.000626944		Hcls1	1.56307	0.000581034		Tapbp	1.21216	2.87556e-05		BC006779	1.75567	0.000204839
Ereg	1.57333	0.000639281		Ifrd1	1.00135	0.000583155		Adamts3	1.15996	2.90455e-05		1700024G13Rik	-1.741	0.000204839
Ocstamp	1.23806	0.0006396		Cyth4	1.22902	0.000583155		Lilrb3	1.53632	2.95077e-05		Ppp1r14d	1.02467	0.000204839
Ccl5	1.84	0.00064848		Trim14	1.08582	0.000595611		Bmp3	-1.31028	2.9702e-05		Dnase1l3	1.107	0.000204839
Tnfaip3	1.54	0.00065059		Ank3	-1.48569	0.000603425		Hck	1.10138	2.97052e-05		Osmr	1.02733	0.000204839
Sprr1a	1.82667	0.00067865		Fabp4	1.30733	0.000605671		Pnp	1.42989	2.97052e-05		Ffar2	1.07667	0.000204839
Cst7	1.55944	0.000681325		Ly6c1	1.25263	0.000609977		Fst	1.27923	2.99583e-05		Cyp4f18	2.40533	0.000204839
Mreg	1.52278	0.000684163		Ppp1r14a	-1.18254	0.000621312		Cd8a	1.68018	3.11854e-05		Prkar2b	-1.30333	0.000204839
Gm8369	1.595	0.000687711		Kcnq1	-1.23358	0.000625213		Slc2a1	1.09926	3.16989e-05		Darc	2.65667	0.000204839
Nts	1.13944	0.000695167		Cysltr1	1.04867	0.000625511		D730005E14Rik	1.67737	3.26079e-05		Fam71a	1.44633	0.000204839
Rnd1	1.02861	0.000697651		Sfrp1	1.93843	0.000628746		AI662270	1.08794	3.28226e-05		1810010D01Rik	-1.225	0.000206226
Cyp7b1	2.57444	0.000717609		BC006779	1.52378	0.000629832		Tnfsf8	1.3898	3.32266e-05		Klra2	1.93633	0.000206227
H2-Q7 /// H2-Q9	1.25111	0.000722886		Il13ra1	1.16322	0.000629914		C1qa	1.53431	3.32665e-05		Gm4951	2.481	0.000206227
Tmem173	1.445	0.000722886		Chmp4b	1.13405	0.000629914		Fcgr3	1.23943	3.48344e-05		Ddx60	1.76367	0.000207274
Sdf2l1	1.15417	0.000722886		Fap	1.42089	0.000629914		Sla	1.26362	3.48732e-05		Lyzl4	-1.47967	0.000207274
Socs1	1.23806	0.000736145		Antxr2	-1.01693	0.000650578		Pstpip1	1.21744	3.52434e-05		Tlr13	1.882	0.000207577
Rab32	1.01	0.000738412		Slc4a5	-2.03701	0.000656653		Cd52	1.54506	3.60288e-05		Negr1	-1.14167	0.000207589
Gpr65	2.33306	0.000745791		Hist1h2af	1.37864	0.000661467		Cyba	1.03072	3.60792e-05		Smox	1.36067	0.000208624
Ccr2	1.6275	0.000750047		G530011O06Rik	1.67923	0.000681047		Chst2	-1.03279	3.61798e-05		Steap4	1.86633	0.000209448
Slc2a6	1.59722	0.000750047		Aim1	1.45713	0.000682019		Limch1	-1.02968	3.64072e-05		Meig1	-1.33067	0.000215388
Gimap7	1.31111	0.000766589		Tlr3	1.07718	0.000682217		Mndal	1.90441	3.64072e-05		Hmox1	1.369	0.000217171
Osm	1.1375	0.000785865		F13a1	1.92539	0.000682217		Sh2d2a	1.12099	3.64072e-05		Igsf10	-1.45567	0.000219868
Pydc4	2.515	0.000785865		Clec4n	2.0283	0.000684464		Gm19951	2.16552	3.64072e-05		6330403K07Rik	-1.04267	0.000221792
Ces2b	-1.23333	0.000785865		Csf3r	1.83125	0.000687202		Myh7	-1.29102	3.67371e-05		Car13	2.056	0.000221798
Ptpn6	1.27111	0.000792664		Sprr1a	3.01923	0.000705577		Bhlhe40	1.04777	3.69547e-05		Tlr6	1.69433	0.000221798
Dnase1l3	1.15556	0.000792664		Tpd52	1.02121	0.000718442		Ccl8	1.47929	3.69547e-05		Ctsz	1.022	0.000221798
Tlr2	1.46333	0.000793473		Etl4	-1.03098	0.000725758		Myo1g	1.03254	3.69547e-05		Kiss1	-1.12867	0.000222033
Cyp1b1	1.33889	0.000793473		Trem2	1.26021	0.000732375		Igj	1.35341	3.72432e-05		Gm1966	1.65067	0.000224015
Ly6c1 /// Ly6c2	1.10528	0.000793684		Il1r2	2.85511	0.000735051		Il7r	1.35581	3.77512e-05		Ociad2	-1.361	0.000224337
C4a /// C4b	1.00639	0.000831015		Plce1	-1.1106	0.000746026		Ccl9	1.3454	3.81248e-05		Pydc3	1.24633	0.000224337
Klra17	1.16833	0.000851153		Ogfrl1	1.1192	0.000746026		P2ry13	1.62858	3.82332e-05		Kcnj13	-1.18167	0.000224337
Coro2a	1.3375	0.000859409		Glt25d2	-1.85661	0.000746026		S100a9	1.67544	3.83093e-05		Slc23a1	-1.065	0.000229453
Sh3rf2	-1.03667	0.000859409		Krr1	1.06998	0.000746026		Itk	1.15345	3.86156e-05		Cnksr2	-1.17367	0.000229453
Cldn2	1.62	0.000872624		C1qa	2.2204	0.000752833		Mid1	1.29749	3.86968e-05		Gm1574	-1.7	0.000229453
Mafb	1.87028	0.000872624		Ltbp4	-1.28736	0.000754445		Csrnp1	1.35541	3.8893e-05		1300002K09Rik	2.029	0.000229453
Ccl20	1.38556	0.000889222		Smarca2	-1.04788	0.000754493		Kcne2	-1.08772	3.99443e-05		Svip	-1.262	0.000230305
Cdkn1a	1.00556	0.000908689		Gm10495	1.074	0.000757678		Itga8	-1.07939	4.07738e-05		Lgmn	1.189	0.000230916
Treml2	1.08667	0.00091184		H2-Q6	1.63396	0.000757678		Inhba	1.70551	4.11238e-05		Reps2	-1.296	0.000230916
Tmem106a	1.71056	0.000925538		Aox3	-2.08824	0.000768877		Sfpi1	1.29034	4.27508e-05		Synm	-1.72633	0.000230916
Csf2rb	1.15806	0.00092565		Chrdl1	-1.18307	0.000770303		Myh10	-1.02982	4.32533e-05		Chaf1b	1.16333	0.000231237
Stfa2l1	1.35639	0.00092565		Ogfr	1.44136	0.000770303		Sell	1.42515	4.34257e-05		Igsf6	2.33133	0.000232142
H2-Q6 /// H2-Q8 /// LOC68395	1.37917	0.000934945		Ncf2	1.17808	0.000770303		H2-M3	1.06637	4.4184e-05		Pcolce2	-1.76333	0.000232176
Has1	1.10333	0.000934945		Hk2	1.46574	0.000772659		Lpcat2	1.18026	4.43963e-05		Trib1	1.22033	0.000232176
AI956758	-1.30389	0.000934945		Junb	1.60264	0.00077325		Pnpt1	1.19597	4.79206e-05		Uba7	1.45933	0.000232176
Nptx1	-1.18278	0.000934945		Snx10	1.06953	0.000778481		Ptx3	2.00212	4.85302e-05		C730037M02Rik	-1.11767	0.000234493
Il15ra	1.11	0.000938157		Mapt	-1.26286	0.000787588		Gm885	1.62595	4.87201e-05		Zcchc2	1.17167	0.00023605
Il12b	1.44111	0.000945515		Fam189a2	-1.33119	0.000796516		Trim34b	1.36401	4.91844e-05		Tarm1	1.376	0.00023605
Lap3	1.02083	0.000957141		Nuak1	-1.12724	0.000796516		Stat4	1.12844	5.01371e-05		2022-03-05	1.20833	0.00023605
Zmynd15	1.22583	0.000961064		Cxcl1	2.88467	0.000796632		Aim2	1.42093	5.07179e-05		B3gnt4	-1.009	0.000238073
Lat2	1.04	0.000961064		Ifitm3	1.25556	0.000798483		Plekhh2	-1.06734	5.11046e-05		Il10ra	2.062	0.000238678
Sh2d1a	1.39	0.000961064		Fat4	-1.09018	0.000798483		Plekho2	1.12456	5.11358e-05		Myh7	-1.631	0.000238678
Cxcl16	1.20694	0.000965848		Cdc42bpg	-1.30941	0.000798483		Slfn5	1.04024	5.12899e-05		T2	-1.45933	0.000239564
Ptprc	1.08722	0.000969344		Ccnyl1	1.20899	0.000798483		Tagap	1.56296	5.14181e-05		Mthfr	1.16	0.000241365
C1qc	1.61889	0.000969959		Gpr155	-1.12891	0.000810496		Runx3	1.10646	5.38219e-05		Nlrc5	2.115	0.000241365
Cd300a	1.905	0.000979966		Cd180	1.39331	0.000813341		Trav9d-3	1.41492	5.4326e-05		Expi	1.44633	0.000243225
Gpr35	1.405	0.000980108		Faim2	-1.306	0.000816327		Trim12a	1.09126	5.4624e-05		1700007G11Rik	-1.37367	0.000243225
H2-M3	1.19556	0.000998223		Chsy3	1.01558	0.000816898		Mt2	2.52968	5.69181e-05		Tgif1	1.10133	0.000243225
Nuak2	1.22	0.00102464		Adm	1.72371	0.000816898		Ncf1	1.19547	5.78415e-05		Tnfsf8	1.81033	0.000243225
Morc1	1.46	0.00102731		Ctsz	1.1197	0.000837068		Bcl3	1.04915	5.9638e-05		C1qc	1.78533	0.000243582
Reps2	-1.05806	0.00102838		Rgs16	2.92198	0.000837068		Trib1	1.03186	5.9638e-05		Fcgr3	1.55	0.000246744
Cd14	1.18944	0.00103453		Plekhh2	-1.31012	0.000837068		Slc25a22	1.16941	5.99725e-05		Txndc6	-1.468	0.000246744
Csf2rb2	1.38056	0.00105419		Nfkb2	1.35678	0.000837068		Alpl	1.42217	5.99725e-05		Lrg1	1.55933	0.000246744
Oas1b	1.78722	0.00105571		I830127L07Rik	2.84663	0.000837068		Plk3	1.00772	6.03653e-05		Il28b	1.33667	0.000246744
Dbp	-1.00278	0.00106306		Enc1	1.21709	0.000843322		Vsnl1	-1.05526	6.07467e-05		Ccne1	1.85333	0.000246744
Tbx21	1.16	0.00106306		Cbr2	-1.14428	0.000844536		Trim14	1.28241	6.1814e-05		Cxcl3	3.075	0.000248557
Ccl19 /// Gm12407 /// Gm13309 /// Gm2023 /// Gm21104 /// Gm2457 /// Gm2564 /// LOC100043918 /// LOC100043921 /// LOC100861618	1.46222	0.00106413		Hk3	1.43747	0.000846356		Slfn3	1.31581	6.55357e-05		Klhl13	-1.419	0.000249508
Csprs /// Gm15433 /// Gm2666 /// Gm7609 /// LOC100041903 /// LOC100503923	2.93667	0.00106765		Lgmn	1.27156	0.000850531		Pon1	-1.29739	6.59927e-05		Dnahc5	-1.95433	0.000249694
Mcoln2	1.145	0.00106994		Abca8a	-1.07249	0.00085112		Thbs1	1.24576	6.73048e-05		Marcksl1	2.02167	0.000251108
Nkg7	1.3725	0.00108114		Pde8b	-1.26127	0.000857212		1600014C10Rik	1.3543	6.73978e-05		Tln2	-1.094	0.000253089
Ms4a7	2.10139	0.0010975		Tnfaip2	1.73882	0.000863712		Bcl2a1b	1.29455	7.03413e-05		Slc15a3	2.62533	0.00025677
Pgap1	-1.3075	0.00112166		Ccl12	3.21149	0.000866565		Gm20559	1.53809	7.14785e-05		Caps2	-1.00133	0.00025928
Slamf9	1.63222	0.00114137		Ptpn6	1.20209	0.00087121		Slc11a1	1.67056	7.53834e-05		Dck	1.611	0.000262264
Lgmn	1.06361	0.00114574		Slc39a14	1.74898	0.000893145		Gpr35	1.07864	7.57483e-05		Lilra6	1.68233	0.000262887
Slfn5	1.66444	0.0011616		Areg	2.19824	0.000893145		Scn3a	-1.23809	7.68575e-05		Sh3pxd2b	1.284	0.000262887
Tet1	-1.55111	0.00117848		Pnpt1	1.46398	0.000893887		Adamts17	-2.00184	7.7769e-05		Stat1	1.25233	0.000263127
Areg	1.85722	0.00118135		Fgf1	-1.15751	0.000902817		Ank3	-1.03828	7.7769e-05		Ly6c1	1.14633	0.000263127
Junb	1.51056	0.00118693		Ly86	1.68008	0.000913777		Isg20	1.09087	8.12764e-05		Tpx2	1.51267	0.000263127
Arhgap30	1.30444	0.00121111		Fosl2	1.17128	0.000913777		Tnfaip2	1.20079	8.12764e-05		Tnfaip3	1.635	0.000263127
Slc16a6	1.27611	0.00121231		Gm885	1.83578	0.000913777		Il2rg	1.08299	8.21908e-05		Dnahc6	-1.895	0.000263127
Selplg	1.01778	0.00121231		Slc38a5	-1.2427	0.000914243		Kmo	1.03999	8.35223e-05		Hepacam2	-1.72367	0.000263127
Tcirg1	1.29833	0.00121231		Lrp2	-1.39297	0.000914243		Fap	1.3312	8.41505e-05		Irf5	2.08967	0.000263127
Tfpi2	1.01306	0.00121795		Cd300lf	2.22143	0.000915578		Mmp15	-1.02841	8.46864e-05		Akap14	-1.58233	0.000263127
C3	1.02944	0.00122734		Lypd2	-1.86594	0.000916529		Lap3	1.01186	8.46864e-05		Apobec1	2.008	0.000263127
Tril	-1.22833	0.00124413		Cxcl2	1.73455	0.000916529		Ltf	2.09283	8.48711e-05		Sirpb1a	2.50333	0.000263127
Pycard	1.33111	0.00124852		Mefv	1.45464	0.000918472		Fras1	-1.46664	8.55319e-05		Gm5483	2.98267	0.000263701
Relb	1.46583	0.00125834		Fcgr2b	1.58173	0.000918472		Gm5424	1.63796	8.55319e-05		Mcm10	1.33467	0.00026381
C1qa	1.49972	0.00128905		Cd19	-1.36063	0.000930886		Itgb2	1.04543	8.72949e-05		Gm10693	1.76933	0.000265239
LOC102634034	1.15083	0.00132615		Prdm8	-1.71912	0.000932599		Ms4a14	1.56932	8.9975e-05		Trim34a	1.685	0.000267229
Lcp2	1.56333	0.00132615		Hif1a	1.34864	0.000939039		Apol9a	1.49709	9.02465e-05		Pipox	-1.02367	0.000270605
Stx11	1.02611	0.00133217		Slc44a3	-1.31427	0.000939687		Hsh2d	1.23103	9.02465e-05		Tgtp1	2.447	0.00027805
Fbxw17	1.08917	0.00136537		Slc15a3	2.43669	0.000940765		Podn	-1.01452	9.11063e-05		Mesp1	-1.31433	0.000278571
Gpr31b	2.52528	0.00138506		Ccl11	2.08023	0.000941061		Spata18	-1.06917	9.11063e-05		Snai2	-1.31533	0.000279777
Nrros	1.2325	0.00141574		Pllp	-1.0118	0.000948212		Rasa4	1.60817	9.14504e-05		Cd33	1.25033	0.000280234
Ncf1	1.10306	0.00145576		Pgm5	-1.63264	0.000951903		Gbp1	1.54937	9.15276e-05		Slamf8	2.17	0.00028324
Rnf31	1.01889	0.00147693		Bmp6	-1.06812	0.000959486		Fam189a2	-1.06549	9.20345e-05		Kazald1	-1.44367	0.000283556
Lif	1.025	0.00149894		Gm20559	1.69626	0.000981553		LOC100862132	1.61587	9.32347e-05		Stfa2l1	3.04967	0.000283556
Phex	-1.3075	0.00150381		H2-Q5	1.43437	0.000983102		A430107O13Rik	-1.12349	9.6106e-05		Mmp25	1.165	0.000285733
Hck	1.25944	0.00153524		Sntn	-1.63287	0.000988596		9130017N09Rik	1.32918	0.00010121		1700012B09Rik	-1.28967	0.000285733
Itgam	1.34944	0.0015424		Scd2	-1.19479	0.000990301		Coch	1.55931	0.00010167		Prr18	-1.205	0.000285733
Snord89	1.38917	0.00156224		Cycs	1.00286	0.00100129		Soat2	1.11143	0.00010305		Mcee	-1.14133	0.000285733
Ociad2	-1.11778	0.00162778		Pla1a	2.2491	0.00100657		Slc26a4	1.9081	0.000103263		Lrrn3	-1.36067	0.000285733
Gucy1a2	-1.07556	0.00165469		Hck	1.5647	0.00100783		Dhrs9	1.48911	0.000103865		Sspn	-1.059	0.000285733
Ggct	1.18444	0.00167303		Mmp3	1.8397	0.00102334		Kcnj13	-1.11903	0.000103865		Serpina3f	3.82033	0.000285733
Mturn	-1.07278	0.00173097		Tpx2	1.01196	0.00104411		Pgm5	-1.14417	0.00010667		Ptgs2	1.58167	0.000285733
Myo1f	1.30472	0.00180714		Ido1	1.03202	0.00104522		2310014L17Rik	1.29704	0.000107003		Lat2	1.366	0.000286756
Fasl	1.065	0.00182348		Lrrc25	1.94892	0.00107948		Agr2	2.05841	0.000107696		Pgm2l1	-1.051	0.000286756
Csf3r	1.52944	0.00182348		Sh3pxd2b	1.43123	0.00108318		Gprin3	-1.0539	0.000108276		Scube1	-1.267	0.000291908
Dmbt1	1.36444	0.00182383		Tcirg1	1.29683	0.0010834		Gm12185	1.90782	0.00010895		C79246	1.40833	0.000291908
Morc3	1.04111	0.00184924		Fhdc1	-1.33732	0.00108342		Ptpn22	1.48155	0.000111173		Sort1	-1.065	0.000294537
Ctsw	1.09889	0.00186319		S100a9	1.99058	0.00108342		Dnahc5	-1.06173	0.000111831		H2-K1	1.48067	0.000295039
Lrg1	1.04333	0.00186355		Plek	1.32734	0.00108608		Lck	1.15875	0.000114519		Plcl2	1.01467	0.000298881
Lypd8	1.16944	0.00186355		S100a8	1.83227	0.00109247		Hist1h1b	1.6122	0.000114519		Ifi47	2.18333	0.000299907
Lrrc17	-1.36083	0.00186773		Slc7a1	1.00072	0.00110139		Igfbp3	-1.08384	0.000114823		Dnali1	-1.107	0.000305655
Ncf4	1.695	0.00187864		Ephx1	-1.59131	0.00110483		Il1r2	2.02812	0.000115261		Cxcr2	2.73933	0.000305655
Rcan2	-1.06444	0.00188312		Kcnk2	-1.35212	0.00111581		Cd48	1.06928	0.000115762		Acss1	-1.36667	0.000305895
Noxo1	1.06472	0.00199858		Gm6904	1.339	0.00113487		Ptk2b	1.02432	0.000116165		Cyp1a1	-2.84733	0.00030641
Zcchc2	1.1325	0.00210867		Slc7a11	1.5753	0.00114846		Gfpt2	1.15342	0.000116991		Zmat4	-1.559	0.000308224
Pik3r5	1.01778	0.00217074		Ano1	-1.09327	0.00115104		Hmga1-rs1	1.0001	0.000117482		Sh2b2	1.66367	0.000308583
Lair1	1.78222	0.00217074		Sema3c	-1.04096	0.00115189		2010005H15Rik	1.50431	0.00011828		Tap1	2.12567	0.000309482
Lpcat2	1.13972	0.00217074		Dcxr	-1.25773	0.00115661		Pnp2	1.63005	0.000120542		Slc7a8	1.86667	0.000309482
Zc3h12d	1.54528	0.00218133		Mmp11	-1.3045	0.00116566		Cd300ld	1.41086	0.00012295		Ddc	-1.78267	0.000311544
Mthfr	1.17833	0.0021932		Osbpl6	-1.62618	0.00117457		Serpina3m	2.45092	0.000125176		Ctsb	1.00333	0.000312964
Glb1l3	-1.22667	0.00245537		Gm9733	2.14716	0.00117732		Ly6a	1.28658	0.000133176		C4b	1.15633	0.000314842
Fbxo30	-1.08111	0.00251343		F10	1.96524	0.00117732		Snx10	1.04362	0.000134929		Papd7	1.133	0.000318834
D13Ertd608e /// LOC102631530	1.49556	0.002562		Tmem212	-1.31868	0.00117732		Cd177	1.88176	0.000134929		Tnfrsf12a	1.826	0.00031952
Cthrc1	-1.13417	0.00269311		P2rx6	-1.08712	0.00118591		Aox3	-1.21805	0.000135176		Omp	1.34433	0.00031961
C030046G05	1.02611	0.00269311		Cd244	1.02879	0.00118591		Tifab	1.28503	0.000137562		Gpr126	-1.10133	0.00031961
Sdc3	1.25	0.00272132		H2-M3	1.26003	0.00118591		Ereg	1.09203	0.000137695		Gm14085	2.31967	0.00031961
Spi1	1.01556	0.00282734		Cd52	1.23393	0.00118591		Gm6904	2.14368	0.000139973		Atp6v1b1	-1.40867	0.00031961
Acaa1b	-1.19972	0.00288284		Inmt	-1.0869	0.00119801		Hepacam2	-1.03432	0.000140677		Trafd1	1.463	0.000324637
Gsdmd	1.06111	0.00294587		Acsf2	-1.24114	0.00120863		Cxcl3	2.70718	0.000142205		P2ry13	1.76967	0.000325915
BC023105	2.02722	0.00294726		Snora28	-1.93356	0.00123391		Adam8	1.14913	0.000143938		Dfna5	1.19933	0.000325962
Cd300ld	1.10278	0.00294726		S100g	-1.50764	0.00125239		Itgax	1.01997	0.000146003		Gm17019	1.12833	0.000327253
Tgif1	1.04167	0.00296265		Cxcl17	1.17768	0.00126295		Il2ra	1.39236	0.000146223		Oas1g	1.547	0.000327253
LOC102640171 /// Trim30b	1.23222	0.00296855		Ccdc48	-1.18392	0.00127918		Fam124b	-1.03917	0.000147336		Gap43	-1.34767	0.000329287
Zfp36	1.09889	0.00298834		Cd86	1.3171	0.00128897		Glp1r	-1.17147	0.000147611		Tnfrsf26	1.08567	0.000329488
Ccrn4l	1.07583	0.00302498		Samsn1	1.16772	0.00129312		Itih4	1.1944	0.000150413		2610002D18Rik	1.069	0.000329488
S100a4	1.03611	0.00302509		Ccrn4l	1.15249	0.00131629		Lgals3	1.02342	0.000150413		H2-Q2	1.538	0.000329807
Cxcl13	3.24278	0.00303443		Eif2c1	-1.03338	0.00132948		Gria1	-1.13742	0.000163677		Gbp2	2.41867	0.000333262
Abtb2	1.20111	0.00303443		Cyp2f2	-1.46941	0.001343		S100g	-1.19421	0.0001645		Lrrc23	-1.515	0.00033595
Hpcal4	-1.10167	0.00303443		Tspan2	-1.01895	0.00139546		Hmgcs2	-1.40017	0.000164854		Myh10	-1.42633	0.00033595
Ifngr2	1.18556	0.00304471		Psmb9	1.13419	0.00141905		Naa25	1.02354	0.000173924		Slc11a1	2.08633	0.000337666
Snx20	1.16611	0.00310626		Olfr170	1.13141	0.00143074		Ablim3	-1.01609	0.000176845		Tmem35	-1.703	0.000337829
Il2rg	1.12389	0.00320246		C3	1.07985	0.00144968		Pgf	1.22158	0.000178569		Kcnmb2	-1.29967	0.000338608
Cyth4	1.88806	0.00321907		Apol9a	1.95897	0.00145206		Scn7a	-1.10859	0.000179918		Cxcl16	1.49933	0.000339235
Esm1	-1.01556	0.00327379		Gm13889	1.04339	0.00145545		Slc37a2	1.09753	0.000184354		Serf1	-1.23267	0.000339302
Slc11a1	1.09083	0.00327379		Ldhb	-1.03438	0.00145727		Mmp25	1.04615	0.000187649		Ddx21	1.00033	0.000339302
Dixdc1	-1.04944	0.00335448		Snora34	-2.25294	0.00148172		1500012F01Rik	1.11276	0.000187649		9930105H17Rik	1.16	0.000339302
Evi2a-evi2b /// Evi2b	1.62111	0.00353133		Zbtb4	-1.14491	0.00148691		Slamf6	1.28212	0.000195534		Ccdc37	-1.192	0.000339302
Pcolce2	-1.10278	0.00364136		Fgfr4	-1.35142	0.00149423		Slc7a5	1.11435	0.000198163		Cd53	1.78067	0.000339948
Ptgfr	-1.29111	0.00375596		Nfam1	1.12664	0.00150013		Robo2	-1.02416	0.000199835		9530025H10Rik	-1.10833	0.000340712
Calml3	-1.30167	0.00382995		Fgr	1.97847	0.00150651		Slfn8	1.7743	0.000200148		1700026D08Rik	-1.15633	0.000340954
Lck	1.03167	0.00389422		Amica1	1.76546	0.0015132		Osm	1.11153	0.000202567		Krt16	1.822	0.000341239
Aim1	1.55139	0.00409053		Eno4	-1.00982	0.0015132		Klrb1f	1.3234	0.000215484		Clec4a3	2.08133	0.000343906
Prss22	1.36111	0.00410022		Rasa4	1.57434	0.00152784		Aida	1.0642	0.000215777		Ccdc17	-1.35667	0.000345742
Lrrn3	-1.14778	0.00410126		Atp10a	1.06293	0.00153943		Tspo	1.00805	0.000218122		Aldh1b1	1.288	0.000345742
Ikzf1	1.04639	0.00418615		Pon1	-2.04654	0.00154182		Cldn4	1.92933	0.00022013		Gm6377	1.549	0.000348517
Clca1 /// Clca2	1.65972	0.00434195		Pcgf5	1.22695	0.00155044		Rhoh	1.06224	0.000221151		Hrsp12	-1.10033	0.000353522
Apoc2	1.53611	0.00439064		Reg3g	1.56423	0.00155603		Mamdc2	-1.08418	0.000223361		Upb1	-1.11567	0.000359514
Hap1	1.05528	0.00441698		Itga8	-1.19067	0.00155603		Fermt3	1.02753	0.000225432		AI607873	2.18667	0.000359514
Copg2os2	-1.53222	0.00442046		Tyrobp	1.64966	0.00158597		Adap2	1.21765	0.000225982		BC013712	2.542	0.000359514
Ces2g	-1.18389	0.00448213		Arpc1b	1.23408	0.0015952		E330016A19Rik	1.29003	0.000226296		Fam189a2	-1.37833	0.000359514
Ceacam1	1.38722	0.00459491		Tnf	2.93038	0.00161601		Gm7160	1.09552	0.000232256		Fyb	1.97267	0.000360338
Ipcef1	1.12889	0.00460259		Cytl1	-1.15872	0.00161999		Stfa2l1	1.77984	0.000232777		Crtam	1.69267	0.000360338
Hcls1	1.33944	0.00472933		Klf12	-1.54679	0.00161999		Acss1	-1.04198	0.000234778		D630037F22Rik	-1.02667	0.000360338
Atp8b4	1.01111	0.0047673		Xdh	1.11092	0.00161999		H2-T10	1.75363	0.00023935		Etv6	1.45933	0.000360338
Krtap17-1	-1.58944	0.0047673		Trex1	1.7581	0.00161999		Il18rap	1.49079	0.000240736		Fbxl13	-1.133	0.000360338
Fabp1	-1.50444	0.00491632		Cd80	2.057	0.00161999		Nrcam	-1.03069	0.000248334		Ankfy1	1.122	0.000360338
Was	1.06861	0.00493614		Gm6377	1.58841	0.00162391		Bdkrb1	1.09317	0.000263761		Dnahc11	-1.152	0.000362844
Xlr3a /// Xlr3b /// Xlr3c	-2.04111	0.00504076		Slc37a2	1.26147	0.00162391		S100a8	1.68248	0.000276603		Ddo	-1.75467	0.00036359
Ddc	-1.70278	0.00511273		Bach2	-1.00332	0.00163371		Myd88	1.07164	0.000290965		Klk1b24	1.45067	0.000364506
Slc29a3	1.29667	0.00517491		Ddx39b	1.13425	0.00164425		Fam198a	-1.14132	0.0002974		F3	1.39167	0.00036545
Neurl3	1.00306	0.00528673		Ube2l6	1.28676	0.00165992		Ripk3	1.04344	0.000297865		Tnfsf14	1.84533	0.000365641
Cd84	1.09333	0.00538726		Tgfb3	-1.13775	0.00167097		Gdap10	1.28951	0.000298608		Snx25	-1.05733	0.000365641
Ogn	-1.00139	0.0055139		AB124611	1.72671	0.001676		Gpr114	1.37467	0.000304924		Fpr2	1.93033	0.000366327
Atp13a4	-1.09056	0.00574109		Pigr	1.43135	0.00167716		Naip2	1.74869	0.000309256		Psmb8	2.013	0.000366327
Bdkrb1	1.13278	0.00585462		Nrn1	-1.90392	0.00168082		Snai2	-1.26635	0.000324101		9930111J21Rik2	1.39467	0.000366327
9330175E14Rik	1.39222	0.00585462		Sap30	1.79635	0.00168292		Trim30b	2.33782	0.000330469		Nfkb2	1.34367	0.000366668
2210011C24Rik	-1.34694	0.00597472		Hmox1	1.4709	0.00168562		Ddit3	1.12275	0.000330469		Ubd	3.91967	0.000370522
Clec5a	1.64556	0.00597789		Bhlhe40	1.18144	0.00169045		Cd7	1.2895	0.000330469		Coro2a	1.18633	0.000372984
Egr1	2.04	0.00619374		Dnahc11	-1.15664	0.00169289		Socs1	1.07418	0.000339004		Etl4	-1.21	0.000374609
Ccr7	1.22333	0.00630055		1810033B17Rik	1.20229	0.00170481		I830077J02Rik	1.40291	0.000344423		Art4	-1.06833	0.000375329
Wif1	-1.40694	0.00630055		Hbegf	1.3012	0.00172123		Hspa1a	1.13358	0.000353317		Cyp2j9	-1.03633	0.000378617
Vsnl1	-1.00556	0.00636678		Krt6a	1.23491	0.00172562		Creb5	1.20846	0.000365723		Aldh1a7	-1.19733	0.000378831
Rrad	1.07833	0.00655308		Pim1	1.73099	0.00173908		Ms4a8a	1.16568	0.000367094		H2-Q10	1.992	0.000379971
S100g	-1.01222	0.00679005		Psmb10	1.51531	0.00173908		Psd4	1.00944	0.000377132		Ccl1	1.765	0.000379971
Malt1	1.19167	0.00691816		1110012J17Rik	-1.07108	0.0017393		Arg2	1.24786	0.000394197		Capg	1.08033	0.00038133
Csrnp1	1.18278	0.00706108		Snora31	-1.85651	0.00174015		Klrd1	1.11342	0.000395721		9230104L09Rik	-1.043	0.000382814
Pld4	1.35722	0.00718982		Dnahc6	-1.65491	0.00174672		Cst7	1.09278	0.000397528		Ctnnd2	-1.00667	0.000382833
Hpx	1.27111	0.00718982		Smox	1.34876	0.00174672		Mir31	1.13357	0.00040438		1100001G20Rik	1.107	0.000383196
AI256396	-1.065	0.00720301		Cry2	-1.00789	0.00174996		Arg1	1.25542	0.00040763		Gmppb	1.244	0.000383428
Cd68	1.15389	0.00732093		9930111J21Rik1	1.20256	0.0017776		Sytl2	-1.09947	0.000409487		Aqp6	1.486	0.000384158
Bcl2a1a /// Bcl2a1b /// Bcl2a1d	1.08444	0.00736619		Por	-1.08278	0.00177882		Rnf144a	-1.01921	0.00042817		Elf5	-1.17033	0.00038867
Muc4	1.35778	0.00741128		Fes	1.13222	0.00178629		Sfrp1	1.27934	0.000428335		Fank1	-1.072	0.00039355
Cd3g	1.04667	0.00752415		Lrg1	1.45819	0.00179412		Gm11428	1.48612	0.00043993		Mpeg1	1.83567	0.000395444
Gsta2	-1.08889	0.00787994		Zfp579	-1.0783	0.00180068		Apol6	1.31212	0.000449295		Runx3	1.69467	0.000395766
Prg4	1.87833	0.0080246		Wdr52	-1.42728	0.00180972		Alpk1	1.03437	0.000475591		Itga8	-1.20533	0.00039732
Tbx20	-1.29	0.00850281		Runx3	1.25651	0.00181939		Nlrp3	1.32043	0.000494369		Iqca	-1.793	0.00039732
Msr1	1.23694	0.00851018		Scgb3a1	-1.54644	0.00181939		Sele	1.21092	0.000495624		Sema3e	-1.44267	0.00039732
Stat4	1.09833	0.00917183		Cat	-1.0513	0.00183141		Havcr2	1.36144	0.000508633		Egr2	1.33667	0.00039732
Lama3	-1.00111	0.00930683		Snord17	-2.59386	0.00183141		Sepx1	1.03628	0.000508698		Trim14	1.38533	0.000399331
Fgr	1.16889	0.00958515		Edil3	-1.16846	0.00183141		Cd3g	1.44992	0.000525934		E030019B13Rik	-1.191	0.000399331
LOC73899	1.12944	0.00972783		Gatm	1.44023	0.00184213		Ifit3	1.2823	0.000525934		Slc26a4	1.83967	0.000399459
Gzmc	1.02889	0.0100865		Npnt	-1.0098	0.00184991		Rab32	1.09266	0.000532761		Speer5-ps1	1.21767	0.000399459
Rasgrp1	1.14611	0.0100905		Plekho2	1.13624	0.00184991		AF251705	1.12265	0.00054279		Batf2	2.141	0.000399459
Saa2	1.17722	0.010274		Snhg6	1.39495	0.00186325		Apoc2	1.01235	0.000569105		Socs1	2.85833	0.000399459
Vstm2a	-1.02333	0.0103487		Arg2	1.68437	0.00187396		Tlr8	1.23255	0.000571514		Ifitm6	3.07467	0.000400683
Egr2	1.10833	0.0109452		Igfbp6	-1.15752	0.00188243		Sfrp2	-1.24301	0.000588635		Trim30b	2.549	0.000401017
Cyp1a1	-1.48889	0.0109452		Mgat4a	1.18926	0.00191425		Nrxn2	-1.09391	0.000591721		E030019B06Rik	-1.21267	0.000401017
Coro1a	1.00028	0.0110183		Irf1	1.0295	0.00193425		Lilra6	1.45916	0.000601847		9330101J02Rik	-1.57233	0.000401017
Aldh3a1	-1.06	0.011237		Il10ra	1.68733	0.00202812		Mmp8	1.72979	0.000624084		Robo2	-1.25033	0.000403401
Slc5a12	-1.34472	0.0115571		Gm11428	2.59179	0.00204378		Snx20	1.14375	0.000629383		Plk1	1.02267	0.000403489
9430034N14Rik	1.12833	0.0118896		Alox5ap	1.26431	0.0020837		Atp1a3	1.19647	0.000632068		Adamts17	-1.78567	0.0004044
Svip	-1.07944	0.0122155		Thbd	-1.14377	0.002099		Gm6213	-1.18072	0.00064099		Pip5k1a	2.83167	0.0004044
Kcne2	-1.29333	0.0122802		Sort1	-1.00204	0.00211267		Gpnmb	1.69028	0.000647396		Clec4d	3.24667	0.000404568
Emilin2	1.13111	0.0124881		Ccl20	1.73637	0.00213535		Cd3e	1.10994	0.000654116		Mcm5	1.40767	0.000404568
Fap	1.21167	0.0126091		Csf2	1.92886	0.00213535		Pigr	1.23227	0.000699		Fam92b	-1.443	0.000404568
Aass	-1.26889	0.0134207		Tnfrsf12a	1.62903	0.00214806		Map3k6	1.15019	0.000712027		Ggnbp1	-1.12133	0.000404798
Hspa1a	1.16556	0.014461		Coro2a	1.37554	0.00220075		Gm5150	1.05514	0.000720175		Lrrc56	-1.031	0.000404798
Gpr34	-1.05389	0.0146249		9130017N09Rik	1.02438	0.00221495		Gm6637	1.6951	0.000757321		Lhx2	2.134	0.000406749
Siglec5	-1.02472	0.0146249		Tnfrsf1b	1.50518	0.00223052		Cd244	1.20188	0.000854901		Kcnip4	-1.61	0.000406749
Ikbke	1.30667	0.0150412		Myo1f	1.44587	0.00223368		Cstb	1.03247	0.000899972		Fam19a1	-1.01033	0.000406749
Kctd8	-1.01556	0.0156928		Bdkrb1	1.08197	0.00230333		Ccdc129	-1.01669	0.000952255		Pira11	1.73667	0.000406749
Tnnc1	-1.03333	0.0157007		Plxnb1	-1.21226	0.00230333		Ccnjl	-1.09315	0.00100246		Orm1	2.466	0.000409813
Npr3	-1.29111	0.0164294		Selp	2.55014	0.00230599		Trem3	1.03244	0.00101197		Celsr3	1.48933	0.000410991
Itk	1.20972	0.0166593		Lrat	-2.44784	0.00233793		Fkbp5	1.16551	0.00101197		Pla1a	3.54567	0.000412494
Prdm8	-1.315	0.0167516		Thbs1	1.55284	0.00235644		Gm4759	1.22425	0.00101428		Zc3hav1	1.39067	0.000416754
Sult1d1	-1.4175	0.0184282		Gm13251	1.05375	0.00236693		Per1	1.34254	0.00101428		Arxes2	-1.135	0.000418908
Ces1e	-1.02889	0.0201002		Cuedc1	-1.11975	0.00237096		Arrb2	1.11036	0.00103953		Relb	1.46233	0.000418908
Naip5	1.11833	0.0209271		Retnlg	1.99421	0.0023784		Bex6	2.03804	0.00105569		Oas1e	1.21067	0.000426717
Ugt8a	-1.11722	0.0209868		Tlr1	1.47407	0.00239023		Slc2a6	1.1338	0.00106057		Stk33	-1.21267	0.000426717
Mrgpra2a /// Mrgpra2b	1.06222	0.0210976		Srpx2	-1.10766	0.00245611		Tcrb-J	1.07567	0.00111023		Bex6	1.06067	0.000427301
Rac2	1.03389	0.0219434		Tlr2	1.61248	0.00248228		Gbp6	1.18142	0.0011941		Riiad1	-1.387	0.000430655
Plau	1.34667	0.0230314		Sp140	1.10719	0.00248495		Zufsp	1.00173	0.00121638		Sap30	1.299	0.000431028
A130071D04Rik	1.99639	0.024636		Cldn4	2.17674	0.00249546		Klrc1	1.11931	0.00122945		Gpr141	1.81767	0.00043128
Fos	1.44778	0.0248276		Ablim3	-1.24631	0.00249796		Dio2	1.47528	0.00137922		Ntf3	-1.01467	0.000432169
H2-Q10	1.00556	0.025194		Snai2	-1.12616	0.00251735		Apol10b	1.27977	0.001398		Dio2	2.15267	0.000432169
Tgm1	1.13694	0.0272447		Npr2	-1.24204	0.00251841		LOC100038947	1.8738	0.00152297		Hmga1	1.27667	0.000432169
Gdap10	1.74389	0.0273719		Arhgef38	-1.45455	0.00251841		Eln	-1.36366	0.00153229		BC023202	-1.167	0.000433647
Gm4354	1.41639	0.0282061		Grb14	-1.27069	0.00253706		Brip1	1.01539	0.00155299		Nmral1	1.232	0.000433647
Hspa1b	1.20972	0.0288733		Specc1l	-1.0131	0.002544		Junb	1.04638	0.00161421		Srm	1.01533	0.000433717
BC002288	1.59472	0.030202		Gdap10	1.28411	0.00255547		Trex1	1.8738	0.00171293		Gpr31c	1.59633	0.000433717
Mmp13	1.28472	0.0303772		Gfpt2	1.65189	0.00258328		Cxcl2	1.07858	0.00171339		2900006K08Rik	-1.20533	0.000436287
Rhox4b	1.15556	0.033675		Ndst1	-1.03824	0.00261211		Csf2rb	1.03252	0.00173197		Dmbt1	3.54433	0.000436855
AI314604	-1.01306	0.0337292		Orm2	1.69626	0.00268506		BC094916	1.69027	0.00174539		Mycbpap	-1.42733	0.000442959
Plcxd3	-1.01722	0.038872		Zfp704	-1.04546	0.00269707		Dnahc6	-1.03133	0.00174539		Sp100	1.91767	0.000442959
LOC552909	1.06389	0.0409254		Dapp1	1.14657	0.00274856		Fgf23	1.64954	0.00178535		Amica1	1.51833	0.000442959
Edil3	-1.14778	0.0422714		Snora15	-1.75917	0.00278248		Rasgrp1	1.03339	0.0017997		4430402I18Rik	-1.04467	0.000443353
Cst8	-1.07222	0.043597		Tgm1	1.37054	0.00278248		LOC100862652	1.09948	0.00200118		Ecm2	-1.85533	0.000443353
Cldn8	-1.02833	0.0441021		Chst3	-1.1306	0.00281545		Treml2	1.07195	0.00225764		D730005E14Rik	1.05433	0.00044397
Erdr1	1.07306	0.0449781		Sema4d	1.34639	0.00282891		Snx22	-1.02108	0.00233609		5430402P08Rik	-1.592	0.000447693
Igfbp3	-1.04278	0.0461183		I830077J02Rik	1.79822	0.00283604		Hpx	1.20093	0.00236116		Glrx	1.02933	0.000450291
				Nckap1l	1.09674	0.00290071		Prg4	1.20565	0.00237723		Hap1	2.068	0.000453767
				Lap3	1.31879	0.00290071		1700007G11Rik	-1.03014	0.00246696		1700007K13Rik	-1.17533	0.000453767
				P2ry13	1.11861	0.00292791		Art2b	1.73175	0.00253838		Fcer1g	2.132	0.000457718
				Chrna7	1.15945	0.00296541		Nlrp1c	1.41451	0.00271785		Colq	-2.53467	0.00046691
				Arid5a	1.37065	0.00297207		Cxcl17	1.09341	0.00277616		Ppp2r2b	-1.15333	0.000470018
				Fam120c	-1.00602	0.00299995		Gm15448	1.00014	0.00289204		Olfr576	1.14767	0.000470018
				Gm20024	1.54654	0.00299995		Pkhd1l1	-1.0757	0.00308144		Tmem212	-1.23067	0.000470018
				Ier3	1.25769	0.00300001		Cks2	1.03695	0.00319323		Myh6	-1.02	0.000472718
				Pstpip1	1.34173	0.00300739		Ncr1	1.06941	0.00324361		Rab32	1.09633	0.000481478
				Adamts17	-1.42132	0.00305945		Pglyrp2	1.155	0.00347132		Lrrc34	-1.143	0.000481478
				Irs1	-1.2297	0.00312035		Hist1h2ab	1.09876	0.0034758		Klk1b4	1.15867	0.000481478
				Odc1	1.09335	0.00316485		Sprr2a1	2.16607	0.00349709		Ly6a	1.48567	0.000481478
				Rab6b	-1.74634	0.00318226		Sult1d1	-1.08542	0.00350846		Gchfr	-1.21667	0.000481478
				Gm20235	1.14655	0.00318402		Cxcr2	1.82301	0.00389385		9130022000000000	-1.34533	0.000483035
				Vsnl1	-1.26885	0.00319183		2210415F13Rik	1.80628	0.00399941		LOC548102	-1.29733	0.000485928
				A430084P05Rik	2.31987	0.00321778		Krt6a	2.00414	0.00412817		Mt2	3.26933	0.000485928
				Il18rap	1.36943	0.00323272		Serpinb5	1.07251	0.00413856		Pira6	2.04667	0.000486094
				Ak7	-1.4431	0.00324729		Reg3g	1.4701	0.00427649		Ms4a4d	1.08233	0.000488078
				Peg13	-1.09624	0.00339098		Serpinb2	1.52178	0.00452029		Serpina3h	1.06567	0.000494517
				Cyp1b1	1.6845	0.00340982		Il15	1.05212	0.00470463		Fndc5	-1.38133	0.00049677
				Fbln5	-1.25184	0.0034321		Serpina3i	1.36049	0.00475122		Mpv17l	-1.10033	0.00049677
				Akd1	-1.29748	0.0034323		Saa2	1.52154	0.00480368		Rgs11	-1.02933	0.00049677
				Tubb6	1.77352	0.00344593		Prss22	1.10124	0.00500886		Tlr7	1.09067	0.000497192
				Cebpb	1.13249	0.00348083		Retnlg	1.22539	0.00502412		9330175E14Rik	1.754	0.000497451
				Trim34a	1.73629	0.00348373		Mir568	-1.1414	0.00504435		Kcnn2	-1.044	0.000498532
				Cd68	1.9353	0.00349534		Sncg	1.03284	0.00514253		E230028L10Rik	-1.309	0.000501721
				Acoxl	-1.54186	0.00349592		Il1f9	1.53471	0.00625956		Gbp6	2.21967	0.000502225
				Slamf9	1.6869	0.00351358		Ly6c1	1.7644	0.0103086		Fabp1	-1.924	0.000503453
				Selplg	1.4177	0.00354396		Gm20317	1.24392	0.0103121		Cdhr3	-1.66467	0.000504692
				Sell	1.11504	0.00355226		Clca1	1.20732	0.0104888		Tcirg1	1.582	0.000504875
				Exosc7	-1.18842	0.00358379		Klri2	1.12147	0.0110718		Ang2	-1.23867	0.000505923
				Spink5	1.47305	0.00358902		Cyp1a1	-2.33754	0.0111518		Fgl1	1.465	0.000506999
				Mov10	1.26078	0.00359209		Il12rb2	1.02008	0.0114138		Gdf15	1.91867	0.000506999
				Klrk1	1.18991	0.0036138		Lrat	-1.43263	0.0143855		Gm11627	-1.335	0.000507127
				Ldlrad1	-1.10123	0.00362451		Igkv4-59	1.29645	0.0149393		Pik3r5	1.271	0.0005083
				Csf1	1.29686	0.00362451		Slc7a11	1.252	0.0156997		Zfp704	-1.28067	0.0005083
				Metrnl	1.02633	0.00362451		Fpr2	1.08773	0.0160538		Cxcl9	4.83833	0.000508453
				Izumo4	-1.11884	0.00370392		Krt15	1.17312	0.031496		Tmem136	-1.12367	0.000508453
				1810019D21Rik	-1.1616	0.0037393		Mir1949	1.28086	0.031702		Trem2	1.26467	0.000512362
				Aim2	1.15092	0.0037393		Snora75	1.33786	0.0398993		Selp	2.38033	0.000512453
				Slc25a23	-1.37894	0.00378445						Bex1	-1.347	0.000513612
				C030017K20Rik	-1.07289	0.00382381						Tspo	1.01467	0.000513796
				Nfkbia	1.14127	0.00388598						Gbp9	1.33733	0.000513796
				Ms4a4b	1.01361	0.00391818						Axl	1.00033	0.000515721
				Gm5150	1.70094	0.00404318						Ldhb	-1.21933	0.000518759
				Uba7	1.12477	0.00406882						Tapbp	1.09867	0.000522994
				Ndrg2	-1.08728	0.00408136						Dbndd1	-1.03433	0.000522994
				Sdad1	1.04749	0.00412659						4921509J17Rik	-1.09433	0.000522994
				Adam8	1.4961	0.00415646						Gpnmb	1.52833	0.000523996
				Mettl7a1	-1.34799	0.00421886						Scn3a	-1.79633	0.000527202
				Arvcf	-1.02494	0.00424301						Dnahc7b	-1.37433	0.000527342
				Lipg	1.02381	0.00426139						Rsph4a	-1.062	0.000528567
				Tpcn1	-1.16992	0.00426461						Ptger4	1.28467	0.00053082
				Rab32	1.25361	0.00428583						Pla2g2e	1.01833	0.000531163
				Gpr171	1.4893	0.00431841						Psmb9	1.295	0.000532938
				AI662270	1.2206	0.00435847						E030046B03Rik	-1.04567	0.000533859
				Aif1	1.51092	0.00437653						AU021034	-1.10133	0.000534499
				Cstb	1.1856	0.00442261						Ripk3	1.319	0.000535846
				Scn7a	-1.23182	0.00442261						Ncf2	1.31367	0.000535846
				BC147527	2.16528	0.00442624						Slc28a2	2.363	0.000536153
				A430107O13Rik	-1.15666	0.00443105						Il2rb	1.977	0.000536464
				LOC100861977	1.28206	0.00448077						Pim1	1.243	0.000536464
				Lgi3	-1.62841	0.00466768						Cd52	1.847	0.000536464
				Adarb1	-1.22967	0.00466768						Ly6e	1.54233	0.000536464
				Abca3	-1.12598	0.00466768						Samsn1	1.49867	0.000536464
				Rgs4	1.03173	0.00469463						Dnaja4	-1.04033	0.000536464
				Rtp3	-1.18141	0.0047002						Cd68	1.44033	0.000536464
				C1qc	1.56363	0.00477268						Fbln5	-1.15633	0.000536464
				Etv5	-1.38729	0.00478103						Gzmb	2.84333	0.000536464
				Pilrb1	1.11602	0.00480637						4930451C15Rik	-1.80133	0.000536464
				Ncf4	1.65784	0.00481262						Gpr35	1.462	0.000536464
				B430306N03Rik	1.94423	0.00489058						Gm5595	1.13433	0.000537032
				Pilra	1.16026	0.00492571						Pgf	1.486	0.000537764
				Il15	1.00654	0.0049264						1600029I14Rik	-1.63067	0.000539503
				Emr1	1.37313	0.00496727						Tmeff2	-1.02867	0.000542097
				Ces2g	-1.86819	0.00497502						Sh2d5	1.74833	0.000542122
				Pld4	1.56842	0.00497502						Mt1	2.02733	0.000544679
				Dusp6	1.02695	0.00499751						Grap2	1.02867	0.00054639
				AU021092	-1.28099	0.00500851						Gbp7	1.91367	0.00054639
				C1qtnf2	-1.11036	0.00506317						Gda	1.25	0.00054639
				Rab20	1.40582	0.00507433						Nts	1.56867	0.00054639
				Rnf167	-1.06821	0.0050937						1500035N22Rik	-1.74733	0.000548642
				Ptx3	2.51138	0.00510978						Slc16a6	1.35867	0.000548642
				A530064D06Rik	2.41558	0.00514568						B930025P03Rik	-1.148	0.00054923
				Adamts4	1.74643	0.00514712						Apof	1.108	0.000549428
				Gzmb	2.44683	0.00516864						Hcls1	1.62333	0.000550348
				Csf2rb2	2.15236	0.00521886						Apoc2	2.819	0.000551022
				Arhgef15	-1.11149	0.00521886						Sla	1.05267	0.000552427
				Lass4	-1.27935	0.00522603						Cngb3	1.523	0.000552427
				Cxx1c	-1.8093	0.00535784						Gins2	1.01167	0.000554244
				Tnfrsf9	1.47778	0.00544611						Ifitm1	1.13967	0.0005545
				Bmp3	-1.34337	0.00546411						Slc16a11	-1.17067	0.000555774
				Trem1	1.51162	0.00559036						Olfr1396	1.12567	0.000559217
				Plcb1	-1.0271	0.00561342						Smarca2	-1.217	0.000559217
				Rnf34	1.01977	0.00563612						Ass1	1.91667	0.000561242
				Ifi30	1.15316	0.00566497						Gm9733	2.66	0.000562003
				Gm1614	-1.29252	0.00569999						Dnahc10	-1.86667	0.000563218
				Cttnbp2	-1.10152	0.00570106						Dnahc2	-1.14867	0.000566111
				Gadd45b	1.10633	0.00574771						Insrr	1.011	0.000566111
				Tubb4a	-1.23086	0.00575413						Ropn1l	-1.02767	0.000566111
				Ccl5	1.62505	0.00577079						Ccl5	2.35267	0.000566111
				Atp8b1	1.06718	0.00578092						Ccdc88b	1.27033	0.000566653
				Rsph4a	-1.52678	0.00578542						Bid	1.41767	0.000570657
				Pik3r5	1.14461	0.00586675						Birc3	1.00367	0.000572608
				Slc7a5	1.66252	0.00594706						Fam183b	-1.43067	0.000573294
				Sec14l4	-1.34768	0.00595333						Mmp14	1.04433	0.000574912
				Dynlrb2	-1.40402	0.00601286						Ttc29	-1.63533	0.000580936
				Fuz	-1.04859	0.00603614						Gm12250	3.10867	0.000587083
				Scube2	-1.33582	0.00622428						B4galt5	1.43067	0.000594978
				Cd83	1.06736	0.00625441						Grina	1.126	0.000595537
				C87198	-1.67586	0.00633028						Cdc42bpa	-1.01467	0.000598643
				Rasgrf2	-1.24128	0.00633642						Igtp	2.91033	0.000599458
				2210403K04Rik	1.06145	0.00635179						Il1b	3.801	0.000600858
				Snora69	-1.97517	0.00636365						H2-Q6	1.503	0.000600858
				Higd1b	-1.03364	0.00636365						Fgfr4	-1.192	0.000601257
				Fmo3	-1.81174	0.00637298						Clca1	2.516	0.00060127
				Pstpip2	1.09704	0.00642397						Ncf4	2.023	0.000601956
				1700040L02Rik	-1.33653	0.00653828						Spag6	-1.14567	0.00060202
				Ahnak2	-1.13802	0.00664377						Tnfrsf18	1.28633	0.000602937
				2900060B14Rik	1.0031	0.00669556						Pld4	1.61233	0.000602937
				Tril	-1.09754	0.00669682						Cd180	1.302	0.00060583
				Pla2g1b	-1.53274	0.00669682						Klk1b5	1.66533	0.000607816
				Gstk1	-1.10578	0.00669682						Pml	1.396	0.000607906
				Hc	-1.31309	0.00671767						Atp8b4	1.03133	0.000607906
				Ar	-1.09166	0.00678863						Grn	1.198	0.000607906
				Dhrs9	1.1678	0.00685717						Mtx3	-1.14433	0.000612634
				Nop58	1.07523	0.00698583						Hey1	-1.162	0.000622555
				Gypa	-1.34828	0.00705299						Slc44a3	-1.052	0.000625833
				Rhou	1.40255	0.00720046						Nrn1	-1.345	0.000625833
				Mid1	1.13364	0.00731915						Clstn2	-1.02667	0.000627679
				Sox7	-1.14324	0.00736358						Csf1	1.70533	0.000629765
				Itgam	1.93688	0.00748233						Mgat3	-1.36367	0.000629838
				Alas2	-1.72923	0.00748593						Kcne2	-1.64533	0.000634635
				Fkbp5	1.26532	0.00766294						Bcl2a1c	1.37533	0.000641096
				Treml2	1.01087	0.00766294						Il11	1.56133	0.000642413
				Gm6976	-1.2212	0.00769913						Ces2c	-1.17567	0.000642413
				1700024G13Rik	-1.1082	0.00771665						Stfa2	3.029	0.000642924
				B430010I23Rik	-1.55676	0.00772266						Eomes	1.15533	0.000643116
				Flt3l	-1.02604	0.00774066						0610009L18Rik	-1.274	0.00064899
				Fam161a	-1.04203	0.00781627						Ifi203	1.598	0.000649207
				Snord22	-1.70499	0.00787034						9030625A04Rik	1.42067	0.000649468
				Mir27b	-1.29573	0.00804964						Parp11	1.384	0.000650129
				Wdr6	-1.04919	0.00811067						Slc4a11	1.06967	0.000650129
				Hsh2d	1.01219	0.00816705						Dpysl2	-1.09633	0.000651
				Slc16a1	1.51181	0.0083078						Amigo3	1.48467	0.000651
				Tlr6	1.02453	0.00832154						Pcp4l1	-1.08033	0.000653823
				Cckar	-1.1344	0.00832154						Cxcl5	3.59667	0.0006579
				Wdr96	-1.47314	0.00835783						BC033916	1.03467	0.0006579
				Has2	1.03646	0.00846712						Slc37a2	1.61267	0.000660462
				Nrxn2	-1.45275	0.00857501						Vcan	2.06967	0.000660462
				Tagap	1.29081	0.00859322						Tubb3	1.241	0.000661635
				Scgb3a2	-1.05243	0.00859322						Tuba1c	1.09933	0.000661635
				Nrbp2	-1.15504	0.00860243						Bmp6	-1.10667	0.000661635
				Csrnp1	1.6487	0.00864184						Il3ra	1.12533	0.000661635
				Pltp	-1.1436	0.00877137						Ephx1	-1.08	0.000666408
				Sh3bp2	1.47274	0.00879136						Bhlhe40	1.31933	0.000666408
				Rtkn2	-1.16453	0.00884438						Sntn	-1.06033	0.000670651
				Mrgpra2a	1.16303	0.00889616						1700001C02Rik	-1.38467	0.000672611
				Vkorc1	-1.09278	0.00906449						Rassf3	-1.05133	0.000672611
				Slc2a1	1.03435	0.00906914						Trim15	1.77633	0.000672611
				Tnip1	1.2884	0.00910001						Cyp39a1	-1.47967	0.000672722
				Olfr331	-1.02036	0.00914679						Vpreb3	-1.67067	0.000674737
				Gria1	-1.0332	0.00915406						Cldn8	-1.60267	0.000679531
				Olfml2a	-1.07875	0.00915761						Tnn	-1.61667	0.000680931
				Lrrn3	-1.24555	0.00916809						Col4a6	-1.04333	0.000680931
				Slamf8	1.29283	0.00927958						Pnpla7	1.03733	0.000691578
				Mir145	-1.15827	0.00930162						Cdc42bpg	-1.01633	0.000692702
				Pdk2	-1.00248	0.00931872						Clca2	2.4	0.000698339
				Mir23b	-1.6308	0.0095332						H2-K2	1.40367	0.000699253
				Il2ra	1.10366	0.009654						Ceacam16	1.476	0.000699253
				Ccdc108	-1.40199	0.009654						Sh3rf3	-1.12767	0.000699253
				Il21r	1.34577	0.00970597						Pira2	1.578	0.000699253
				Crip2	-1.00339	0.00985675						Klk1b3	1.29533	0.000699253
				Pnp	1.01416	0.00985675						I830127L07Rik	1.96667	0.0006998
				Aldh1a7	-1.01832	0.00997185						Caprin2	-1.09533	0.0006998
				Ccl17	1.39572	0.010081						Sertad1	1.006	0.000701887
				Gm19980	-1.14007	0.010114						Hmgcs2	-1.63667	0.000708838
				Tnfaip6	1.09731	0.0101247						Sec16b	-1.07733	0.000708838
				Pgf	1.36323	0.0101504						Rab3a	-1.14567	0.00071056
				Glb1l2	-1.18562	0.0102123						Efhd2	1.173	0.000716153
				Tfpi2	1.19823	0.0102128						Klra17	1.11133	0.000716224
				Cbr1	-1.09742	0.010691						Bace2	-1.014	0.000718174
				Snora75	-1.75001	0.0107072						Il1r2	3.042	0.000718245
				Rgs22	-1.60175	0.0107588						Tspan4	1.186	0.000718789
				Nynrin	-1.2253	0.0107626						Psd3	-1.17	0.000721477
				Fgf23	1.5706	0.0110413						Asap3	1.36867	0.00072423
				Lpar3	-1.00568	0.0110824						Dnmt3l	1.16367	0.00072423
				C2	1.43665	0.011085						Bcl2a1d	1.31867	0.00072423
				Lpxn	1.62752	0.0111666						Wbscr27	-1.184	0.000724965
				Rbpjl	-1.2915	0.0112679						Rcan2	-1.39567	0.000734904
				Scnn1b	-1.03032	0.0112679						Kifc2	-1.10367	0.000735548
				Gyk	1.30518	0.0113194						Sema3c	-1.06967	0.000741438
				Alpl	1.29439	0.0113636						Atp2b2	-1.32067	0.000744385
				Ccl8	1.06704	0.0113673						Tubb6	1.112	0.000749134
				Snora16a	-1.37622	0.0117957						Serpina3c	1.785	0.000749963
				Gnl3	1.01436	0.0119375						Slc29a3	1.01167	0.000754656
				Ptcd3	-1.88543	0.012035						Gprasp2	-1.83	0.000754974
				Osm	1.42266	0.012035						Gm5918	-1.12867	0.000755778
				Pisd-ps3	-1.55499	0.012035						Tnip3	1.308	0.00075858
				Tnfrsf23	1.39389	0.0120867						Tmem232	-1.995	0.000764644
				Nav2	-1.1487	0.012146						Ak7	-1.11567	0.000764644
				Pygm	-1.06061	0.012418						Ms4a8a	1.23767	0.000768157
				Ly9	1.08749	0.0124378						Ppil6	-1.16867	0.000774218
				Tifab	1.12238	0.0124781						Cyp2f2	-1.08367	0.000774218
				Nlrp3	1.35043	0.0124781						4932425I24Rik	-1.123	0.000774218
				Mlc1	-1.01623	0.0125777						Nnmt	1.12633	0.000774218
				Asprv1	1.53751	0.0125784						Npr3	-1.731	0.000774408
				Saa1	1.67847	0.0126273						1700016J18Rik	-1.07467	0.000776988
				Lst1	1.56035	0.0127777						Klra22	1.11767	0.000776988
				Dnali1	-1.12166	0.0129737						Efcab10	-1.17167	0.000781444
				Mirlet7c-2	-2.02005	0.0134775						Kctd8	-1.09967	0.000783171
				Ereg	1.04015	0.0138492						Ckmt2	-1.17267	0.000783171
				Lilra6	1.09006	0.0139193						Ddx4	1.27833	0.000785195
				Bpifa1	-1.97342	0.0140169						3300002A11Rik	-2.56867	0.000794944
				Rny1	-2.08297	0.0140172						Pram1	2.051	0.000795642
				Ifitm6	1.42223	0.0140215						Plxdc2	-1.00067	0.000796964
				Fads2	-1.03387	0.0140236						Gm14548	1.42733	0.000802097
				Cotl1	1.03247	0.0140645						Faim2	-1.14	0.000803912
				Acp5	1.30934	0.0141595						Ankrd52	1.23633	0.000805504
				Snx20	1.27479	0.0142197						Tceal3	-1.035	0.000817277
				5031426D15Rik	-1.29609	0.0145494						Adap1	1.299	0.000820328
				Bcl2a1a	1.30569	0.0145596						Gvin1	1.35567	0.000823237
				6720401G13Rik	-1.09931	0.01464						A430107O13Rik	-1.07567	0.000823811
				Tnfsf8	1.01633	0.014684						Il21r	2.06833	0.000824812
				Sprr2a1	1.57839	0.0146897						Atp10a	1.03233	0.000824812
				Rn5s20	-1.77387	0.0147805						Cthrc1	-1.21667	0.000824812
				Sned1	-1.14311	0.0149567						Psme1	1.30167	0.000826105
				Vnn1	1.23203	0.015389						1700001P01Rik	1.145	0.000830932
				Bst1	1.17884	0.015683						1700019L03Rik	-1.15433	0.000834607
				Nfil3	1.04907	0.0156892						Armc4	-1.23733	0.000836115
				Gm7429	-1.82645	0.0161599						Lhfpl2	1.07067	0.000836115
				Sele	1.44443	0.0162988						Scd2	-1.04767	0.000846923
				Plvap	-1.06548	0.0170387						Zmynd15	1.024	0.000846923
				Sorbs3	-1.06389	0.0170422						Arsi	1.18467	0.000848259
				Emilin2	1.0406	0.0173108						Arhgap8	1.05967	0.000851648
				Spata18	-1.37597	0.0174585						Stfa1	1.64667	0.000853674
				Tnfrsf11b	1.28851	0.017668						Tnni3k	-1.02267	0.000863657
				Snora23	-1.50448	0.0177026						Naa25	1.086	0.00086629
				Adamts10	-1.12326	0.0182057						Lap3	1.03867	0.00086629
				Egr2	1.18225	0.0183949						Dtd1	-1.06667	0.000867852
				Saa4	1.9548	0.0184						Gprin3	-1.191	0.000867852
				Tinag	-1.08524	0.0185025						Kcnmb4	-1.46967	0.000870627
				Tnfaip8l2	1.11718	0.0187062						Tnfaip2	1.90733	0.000870627
				Hmga1-rs1	1.15601	0.0197147						Slamf7	1.553	0.000870796
				Sectm1a	1.0123	0.0198136						Scgb3a2	-2.178	0.000877011
				Ikbke	1.11031	0.0198943						Psat1	1.119	0.000891653
				Il17ra	1.09129	0.0206881						Nfkbib	1.022	0.000896092
				Fpr2	1.06889	0.0211156						Sdc3	1.00833	0.000896092
				Kcnj13	-1.06917	0.0215444						Gpr162	1.60467	0.000901809
				Lgals9	1.08516	0.0216211						Akap5	-1.24233	0.00090318
				Itgax	1.17467	0.0218445						H2-Bl	1.35233	0.000907391
				Havcr2	1.30746	0.0222832						Gpr114	1.32967	0.000909968
				Mirlet7e	-1.04399	0.0222875						Cldn10	-1.187	0.000919875
				Fam26f	1.32104	0.0223129						Serpine1	1.67433	0.000929134
				Hspa1a	1.64144	0.0225352						Fgf12	-1.04133	0.000930228
				Cebpd	1.43621	0.0238616						Alox5ap	1.186	0.000930574
				Gm13139	1.20573	0.025095						Gm5148	-1.021	0.000930574
				Gm19763	2.11809	0.0251497						Emilin2	1.55267	0.000930574
				Plk3	1.28822	0.0253197						Rnf19b	1.326	0.000930574
				Cyp2b10	-1.00876	0.0257459						6330407I18Rik	-1.17833	0.000930823
				Mir181b-1	-1.21097	0.0261372						AF251705	1.07367	0.000932752
				Ttc21a	-1.03641	0.0265413						Agap1	-1.25567	0.000932752
				Abhd14b	-1.21288	0.0267372						Ninj2	1.63167	0.000932752
				Hspa1b	1.87257	0.0275162						Xdh	1.17	0.000933097
				Cd79a	-1.19614	0.0280189						Ctsc	1.08967	0.000934912
				Glp1r	-1.15754	0.0285465						Cd209a	-1.51967	0.000934912
				LOC100862223	1.88359	0.0296891						Slc5a12	-1.30633	0.000951726
				Scarna3a	-1.06949	0.0309292						Pik3ap1	1.04667	0.00096009
				Ttc28	-1.03247	0.0313046						Kif26b	-1.204	0.000961353
				Gpr84	1.13477	0.0318962						Nlrp1a	1.31333	0.00096806
				Mir23a	-1.0379	0.0321949						Il4i1	1.895	0.000969829
				Snora17	-1.35737	0.0322978						Fmo3	-1.71133	0.000971171
				Ep400	-1.45012	0.0331179						Cmtm8	-1.11633	0.000972808
				Car3	-1.21723	0.033848						Ank3	-1.14067	0.000974327
				Nckap5	-1.09024	0.0343356						Arc	1.95733	0.000977177
				Xcl1	1.47189	0.0345917						Gm7932	1.04633	0.000979563
				Scarna8	-1.32399	0.0348425						Wscd2	-1.06967	0.000981402
				Vmn2r55	1.09484	0.0360359						Pnpt1	1.005	0.00098423
				Sgpp2	-1.04767	0.0360807						Tmem44	-1.01467	0.00098457
				Mmp9	1.18498	0.0368674						Ly9	1.728	0.000984779
				Mir143	-1.45073	0.0369947						Nrxn1	-1.66833	0.000984779
				E030019B13Rik	-1.33564	0.0378021						Tgtp2	2.11433	0.000984885
				Cd209c	1.69146	0.0379498						Klk1	1.80833	0.000987567
				1110050K14Rik	-1.21343	0.038427						1190002N15Rik	-1.28467	0.000988009
				Samd12	-1.00212	0.0394031						Fcrlb	1.04467	0.000988885
				H2-T10	1.02226	0.0410547						Gpr176	1.44867	0.000988885
				Snord71	-1.73564	0.042022						Sfpi1	1.715	0.000990418
				8430431K14Rik	-1.1878	0.0422899						Poln	-1.004	0.000993145
				LOC100862652	2.46484	0.0427185						Casp1	1.04033	0.000993744
				Snora74a	-1.0997	0.0446168						Tril	-1.46033	0.000996088
				Mir701	-1.12365	0.0459173						Selplg	1.78233	0.000996567
				Snord55	-1.25482	0.0478849						Cybb	1.47033	0.0010011
				Rnu3a	-1.34742	0.0491523						Tlr1	2.41467	0.00101727
				Snora30	-1.73634	0.0497897						Rtn1	-1.02167	0.0010289
												Gpr34	-1.01933	0.00102978
												H2-M2	1.421	0.00103124
												Egfbp2	1.51833	0.00103392
												Limch1	-1.06767	0.00105255
												Sema4d	1.98433	0.00105416
												Hbegf	1.196	0.00105574
												Tyrobp	1.298	0.00105696
												Ptpru	-1.20333	0.00105698
												1700001K19Rik	1.031	0.00105943
												P2rx6	-1.10433	0.00105943
												Ripk1	1.01467	0.00106121
												Tnfaip8l2	1.108	0.00106134
												Lif	1.17767	0.00106372
												Gcg	1.25367	0.00106376
												Retnla	1.796	0.00106388
												Lrat	-1.25833	0.00106396
												Ccr2	1.394	0.00106677
												Osm	1.596	0.00107489
												9030619P08Rik	1.30133	0.00107512
												Irak3	1.13967	0.00107719
												Tmem132a	-1.044	0.00107719
												Slc7a4	-1.03267	0.00107719
												Syt8	1.74567	0.00107719
												Gramd3	1.10467	0.00107719
												Aph1b	-1.08067	0.00107719
												Il18rap	1.23533	0.00107766
												Ptpn13	-1.06333	0.00108084
												Junb	1.64133	0.00108135
												Ikbke	1.22633	0.00109075
												Cst7	1.67033	0.00109718
												Tap2	1.11667	0.00110018
												AI790276	1.61967	0.00110018
												Slc2a6	2.16733	0.00112964
												Gm5150	1.74333	0.00113065
												Upk3a	-1.20567	0.00113127
												Fgf1	-1.04067	0.00113127
												Rgs14	1.20167	0.00114026
												Fam166b	-1.11467	0.00114083
												Has1	2.44333	0.00115016
												Fgr	1.86033	0.00115426
												Il2ra	1.04933	0.00115426
												Tekt2	-1.39567	0.00115644
												Cttnbp2	-1.523	0.00115644
												Unc93b1	1.22467	0.00115644
												Apbb1ip	1.36567	0.00116346
												Klrk1	1.08667	0.00117499
												Il2rg	1.169	0.00117609
												Irgm2	1.69533	0.00118268
												Trim69	1.18667	0.00118522
												Ube2c	1.03367	0.00118677
												Lox	1.36567	0.00118771
												Ngef	-1.03	0.0011901
												Nfkbid	2.13633	0.00119533
												Ccdc146	-1.27867	0.00119757
												Tinag	-1.33933	0.00119757
												Bex4	-1.045	0.00120141
												Dynlrb2	-1.376	0.00121085
												Tnfrsf19	-1.06033	0.00122053
												Clec7a	1.41033	0.00122969
												Igsf1	-1.096	0.001235
												Dkk3	-1.01933	0.0012395
												Tmem171	1.86033	0.00124061
												Cd14	1.69567	0.00124415
												Slc38a5	-1.177	0.00124864
												Krt17	1.315	0.00125529
												Ces2b	-1.38633	0.00126345
												Pgm5	-1.03133	0.00126345
												AI426330	-1.39933	0.00126689
												Sema3a	-1.057	0.00126887
												Serping1	1.16233	0.00126887
												Sidt1	1.13567	0.00128813
												Tmc5	1.16633	0.00128873
												Gdf1	-1.00933	0.0012933
												Enkur	-1.27367	0.00129633
												Tnfrsf1b	1.12367	0.00130038
												Map3k14	1.01033	0.00130121
												Upk2	-1.027	0.00130121
												Elf3	1.042	0.00131821
												Nuak2	1.081	0.00132062
												Pdcd1lg2	1.13533	0.00132075
												Smad9	-1.22567	0.00133139
												Hck	1.08933	0.00134278
												Tnfrsf4	1.07233	0.00134303
												Ptprc	1.5	0.00134833
												Wdr78	-1.041	0.00135645
												Atp13a4	-1.63433	0.00135727
												Csf2	1.18133	0.00136234
												Cd83	1.19833	0.00136234
												Mybl2	1.029	0.0013689
												Apln	-1.05133	0.00137242
												Amph	-1.12333	0.00138478
												Klra9	1.133	0.00139157
												Plekho2	1.40067	0.00139157
												Casp8	1.11133	0.00139157
												Agr2	2.01567	0.0013934
												Wdr52	-1.17767	0.00139345
												Cst8	-1.74167	0.0013997
												Zc3h12d	1.62467	0.00140618
												Gfpt2	1.238	0.00140909
												Gsg1l	-1.43467	0.00140938
												Trem3	1.43033	0.00141696
												Olfr1417	1.11467	0.00141728
												1810011O10Rik	-1.40633	0.00141873
												2210406H18Rik	1.044	0.00143856
												Prex2	-1.08933	0.00145283
												Sell	2.32333	0.00145746
												Arg2	1.21033	0.00147463
												H2-D1	1.246	0.00147514
												Treml2	1.629	0.00151537
												Relt	1.005	0.00151537
												Spa17	-1.19233	0.00151723
												Ptpn6	1.778	0.00151769
												Kmo	1.003	0.00151882
												Uox	-1.31	0.0015231
												Samd12	-1.14	0.00152587
												Was	1.513	0.00153649
												Nxph3	-1.349	0.00154301
												Wdr92	1.56767	0.00154723
												Batf	1.112	0.00155983
												Samd3	1.36133	0.00155983
												Prss46	1.37433	0.00155983
												Hoxa1	-1.00567	0.0015674
												Sp140	1.21533	0.00159055
												Hc	-1.48467	0.00159226
												Scrg1	1.24433	0.00160238
												Pde2a	1.05367	0.00160637
												Mapk1ip1	-1.08033	0.00161891
												Upp1	1.02833	0.00163141
												1110012J17Rik	-1.05633	0.00163653
												Ctsw	1.968	0.00163717
												E130104P22Rik	-1.19067	0.00163869
												Cyp4f15	-1.398	0.00164124
												A730009E18Rik	-1.179	0.00164124
												Acp2	1.13967	0.00164124
												C3	1.08233	0.00169294
												Stx11	1.322	0.00169294
												Actc1	-1.24167	0.00169672
												Trpc3	-1.12433	0.00171236
												Hpse	1.18367	0.00172045
												Pglyrp1	1.667	0.00174351
												Tk1	1.04967	0.00174473
												Aard	-1.116	0.00177766
												Fhit	-1.102	0.00178032
												Zbtb44	-1.06333	0.00179034
												Nfam1	1.23633	0.00182226
												Agrp	-1.11067	0.00182793
												Bmp3	-1.048	0.00183793
												H2-Q7	1.318	0.00184596
												BC057022	-1.269	0.00184984
												Rnd1	1.45367	0.00185377
												S100a4	1.07467	0.00186144
												Col14a1	-1.28367	0.00186807
												Myo1f	1.07967	0.00188174
												Bcl2l15	1.045	0.00188174
												Slc13a2	1.58733	0.00188389
												3930401B19Rik	1.06667	0.00189269
												Kcnk2	-1.02267	0.00189448
												Ncapg2	1.43067	0.00191522
												A130040M12Rik	1.03967	0.00193032
												Flrt1	-1.04767	0.00195384
												Plin2	1.43333	0.00197883
												Gm9992	-1.74933	0.00197883
												Klk1b26	1.35833	0.00198717
												C130050O18Rik	1.30533	0.00198737
												Acoxl	-1.163	0.00199897
												Fgd3	1.069	0.00199924
												Sele	1.55667	0.00200535
												Adora2a	1.348	0.00200781
												Hs3st6	-1.04267	0.00200962
												Bst1	1.046	0.00205285
												Cyp21a1	1.09833	0.00206629
												Pabpn1l	-1.36733	0.00206651
												2610507I01Rik	-1.13567	0.00206657
												Gp2	1.304	0.00207504
												Azgp1	-1.15267	0.00208043
												Fcho1	1.026	0.00208363
												Cadm1	-1.232	0.00208679
												1810010H24Rik	-1.06733	0.00209407
												Csf3	1.85333	0.00212809
												Krtap17-1	-2.24	0.0021365
												Ccrl1	-1.68533	0.0021383
												Gbp10	1.684	0.00216219
												Cd7	1.50633	0.00216363
												Gm11545	-1.11733	0.0021688
												Ifng	2.24167	0.0021688
												Sla2	1.11667	0.00218205
												Gm8369	1.72	0.00218753
												Parvg	1.05433	0.00219637
												Cxcr3	1.36367	0.00220692
												Klrc1	1.22267	0.00222127
												Rbm3	1.069	0.00222526
												Hes2	-1.21233	0.0022425
												Cd300ld	1.178	0.00224533
												B530045E10Rik	-1.115	0.00224814
												Gbp8	1.41067	0.00224814
												Tspan2	-1.24767	0.00225401
												Retnlg	2.80333	0.00225434
												3830431G21Rik	-1.01633	0.0022651
												Stat4	1.314	0.00228185
												Il1f9	1.44833	0.00231871
												Ms4a4b	2.186	0.00232404
												Itga5	1.32467	0.00232572
												S100a8	3.277	0.00234086
												Pilra	1.346	0.00234619
												H2-M11	1.32333	0.00234619
												Pappa2	1.034	0.00235464
												Amn	1.19467	0.00236488
												Sncg	1.15867	0.00238135
												Tnni3	-1.188	0.0023994
												Cd207	-1.237	0.0023994
												Clec3b	-1.05767	0.00243016
												Ptpro	1.167	0.00248003
												Enc1	1.03333	0.00250649
												Pilrb2	1.03333	0.00250866
												F13a1	1.27833	0.00250993
												Pitpnm3	-1.155	0.00254063
												Ccrn4l	1.08133	0.00254967
												Wdr96	-1.15933	0.00255802
												Tdgf1	-1.01033	0.00255852
												Mafb	1.41367	0.00257667
												Sdcbp2	1.05067	0.00257667
												Entpd8	-1.64333	0.00258065
												Scn3b	-1.401	0.00259849
												Acad8	-1.06833	0.00262321
												C1qtnf3	-1.23267	0.0026452
												Coro1a	1.24167	0.0026452
												Cyth4	1.244	0.002655
												P2ry6	1.119	0.00266085
												Dok3	1.49433	0.00266573
												Ppp2r2c	-1.15867	0.00270963
												S100a9	3.03833	0.00271726
												Ccr1l1	1.37267	0.00273343
												Plaur	1.07867	0.00276782
												Mmp19	1.01033	0.00277006
												A130071D04Rik	1.03033	0.00278764
												Rhof	1.106	0.00281542
												Lta	1.059	0.00283164
												5830468F06Rik	1.04233	0.00283705
												Glipr2	1.03767	0.00284887
												Gucy1a2	-1.05533	0.00288543
												Neurl3	1.43033	0.00288977
												Ccr9	1.17633	0.00296572
												Rnf135	1.01367	0.00300703
												Btbd3	-1.02633	0.00302564
												Ncf1	1.16367	0.00303024
												Slc25a22	1.208	0.00303349
												Reg3g	2.18067	0.00306671
												Gpr132	1.22833	0.00308827
												Rbmxl2	-1.05933	0.00311982
												1700009P17Rik	-1.17433	0.00314507
												Slamf6	1.30967	0.00314507
												Car7	1.01367	0.00315173
												Shc4	-1.206	0.00316195
												Gbp11	1.41967	0.00319595
												Ptk2b	1.192	0.00323314
												Alox12e	1.092	0.00329637
												Cd300c	1.054	0.00330808
												Ak8	-1.04433	0.00332529
												5830416P10Rik	1.69833	0.00337087
												Aldh18a1	1.13933	0.00341975
												Trp53bp2	-1.13433	0.00342444
												Atp1a3	1.529	0.00360942
												Gm8884	1.05967	0.00363318
												Tmem86a	1.27233	0.00364352
												Nkd2	-1.01367	0.00364842
												Sult1d1	-1.391	0.00365225
												Nod2	1.21833	0.00368601
												Acot5	-1.01867	0.00379447
												Fbxl7	-1.053	0.00379858
												Cpxm1	1.032	0.00379858
												Gm6213	-1.076	0.00388375
												D230034L24Rik	-1.29033	0.00390749
												9030224M15Rik	-1.03233	0.00393207
												Cc2d2a	-1.14067	0.00396277
												Apol10b	1.083	0.00396784
												1700016D02Rik	-1.223	0.00404679
												Lrrc26	-1.266	0.00411157
												Tspan18	-1.21367	0.00415643
												Nppa	-1.015	0.00422724
												D830015G02Rik	-1.098	0.00424623
												Arrdc3	-1.13067	0.00429786
												Ces2e	-1.62267	0.00436052
												Dnalc1	-1.09467	0.00445454
												Zdhhc22	-1.88867	0.00452719
												Aoc3	-1.00267	0.00452894
												Rasgrp1	1.06267	0.00454777
												Pilrb1	1.27233	0.00456864
												Abat	-1.04967	0.00460766
												Prelp	-1.142	0.00465127
												Rac2	1.71833	0.00470635
												Emilin1	1.29833	0.0047179
												Armc2	-1.00467	0.00473043
												Zc3h12a	1.14167	0.00491541
												Smpdl3b	1.012	0.00491541
												Rbp7	-1.39167	0.00496569
												Gm4203	-1.185	0.00502489
												Myh7b	-1.70933	0.00515072
												Rgs9	-1.04167	0.00515072
												Il1a	1.09633	0.00531437
												Sh2d2a	1.16367	0.00531991
												Pcnx	-1.115	0.00538368
												Apobr	1.06	0.0054111
												Arl5c	1.57367	0.00541663
												Gulp1	-1.14933	0.00541883
												Mlxipl	-1.05867	0.00552748
												Sash3	1.085	0.00553727
												BC055004	1.09833	0.00553727
												Plat	1.114	0.0057593
												Magix	-1.36667	0.0057914
												5430437J10Rik	1.08833	0.00585933
												Rab3il1	1.13033	0.00593948
												Pbk	1.01933	0.00602846
												Setbp1	-1.14333	0.00604458
												AF067061	1.66133	0.00614654
												Aim1	1.231	0.00630437
												Tgfb1	1.04267	0.00630601
												D230018H15Rik	-1.55567	0.00637306
												Zfp521	-1.243	0.00641843
												Aplnr	-1.06833	0.0064444
												C5ar1	1.03033	0.00656424
												Ankrd1	1.302	0.00669418
												Gadd45g	1.214	0.00673573
												Cd300lb	1.105	0.00681513
												Thbs1	1.192	0.00687579
												Muc5ac	1.43633	0.00696707
												Sox11	-1.03867	0.00705285
												Mmp9	1.445	0.00706204
												Mfsd7c	-1.04733	0.00732079
												Wisp2	1.32767	0.00734235
												Il1rl1	-1.07333	0.00741301
												Grb14	-1.083	0.00754314
												Gm20558	-1.15233	0.00754803
												Ccr7	1.29467	0.00772567
												Malt1	1.22933	0.00777115
												Nkg7	1.131	0.0079272
												Egr1	1.634	0.00796223
												Cd96	1.03	0.00825002
												Cd3d	1.31533	0.00839913
												Ces1f	-1.22033	0.00853866
												Cd6	1.18	0.00857066
												Slc7a10	-1.04733	0.0089308
												Slc2a3	1.02367	0.00912818
												S100b	-1.17067	0.0091369
												Snca	-1.16833	0.00914168
												Thrsp	-2.23	0.00919954
												Rabgap1	-1.01933	0.00928395
												Pou2f2	1.37767	0.00951758
												Gpr18	1.155	0.00954397
												Gli1	-1.01833	0.0101101
												Arg1	1.80767	0.010414
												Dach1	-1.12067	0.0108108
												Itln1	1.54967	0.0112639
												Prosapip1	-1.569	0.011279
												Wif1	-1.51267	0.011605
												Rab3c	-1.22867	0.0116492
												Trpm1	-1.13033	0.0124409
												Cys1	-1.01967	0.0126668
												Lck	1.28933	0.0128593
												Dnase2a	-1.10767	0.0143422
												St6galnac1	-1.37267	0.0153896
												Sh3bgr	-1.37733	0.0155122
												Gm1078	-1.017	0.0155818
												Rrad	1.162	0.0160616
												2210011C24Rik	-1.16467	0.0161396
												Rab17	-1.01667	0.0164536
												Snai1	1.02533	0.0167585
												Dusp26	-1.00833	0.0169155
												Padi4	1.076	0.0175248
												Csrnp1	1.62033	0.0183824
												8430426J06Rik	-1.30633	0.0187977
												Cabp5	-1.47233	0.0190095
												Rps21	-1.288	0.0196356
												Pck1	-1.74633	0.0199607
												F10	-1.42867	0.0203145
												DXBay18	-1.02933	0.0205563
												Tgm1	1.39967	0.0209681
												B020031M17Rik	-1.533	0.0210027
												Prdm8	-1.19133	0.0215685
												Doc2b	1.18867	0.02369
												Wfdc1	-1.00933	0.0245918
												Klra1	-1.343	0.0246342
												Cd8b1	1.05867	0.0262712
												Klf15	-1.343	0.0266334
												Itgb1bp3	-1.47033	0.0272966
												Ptprcap	1.10567	0.0290031
												Plch2	-1.11133	0.0324576
												Hes1	-1.025	0.0329062
												Rs1	-1.356	0.0338525
												Scrt1	1.02767	0.0346873
												Sfn	1.07767	0.0361323
												Ltb	1.08067	0.0378413
												Acot1	-1.874	0.039031
												Fos	1.12767	0.0408474
												Acap1	1.123	0.0412589
												1110014N23Rik	-1.072	0.0423064
												Cyp2a4	-1.48	0.0457054
												Ltf	1.139	0.0463788

## Sheet: 5d
ID	GSE62169			ID	GSE158270
	logFC	adj.P.Val			logFC	adj.P.Val
Gbp5	3.33983	3.42228e-06		Crct1	9.28037	1.60939e-15
Saa3	5.26734	1.64057e-05		Bcl2l15	8.00968	3.92825e-15
Cxcl10	5.1559	1.64057e-05		Pip5k1a	5.87033	4.25807e-15
Il1b	2.2838	1.64057e-05		Ifi204	5.68064	4.25807e-15
Ifit1	3.7099	1.64057e-05		Upk2	-5.35006	9.79945e-15
Gm5431	3.75648	1.64057e-05		Pde8b	-4.1102	1.31311e-14
Mx2	3.72063	1.64057e-05		Ccdc129	-6.06309	1.31311e-14
Gm12250	3.0834	1.64057e-05		Maob	-3.43271	1.40057e-14
Ly6i	4.15452	1.64057e-05		Ginm1	5.53362	1.40057e-14
Slfn4	4.66685	1.64057e-05		LOC105245440	7.86481	1.40057e-14
Irf7	3.75483	1.64057e-05		Cyp4f15	-7.03615	1.46436e-14
Gm4902	2.77037	1.64057e-05		Pbld2	-5.5848	1.46436e-14
Plac8	2.52409	1.70097e-05		Bcan	-7.09984	1.50118e-14
Oasl1	3.65436	1.83897e-05		Mt1	3.51312	1.91882e-14
Cmpk2	2.61485	1.83897e-05		Rspo3	4.39177	1.91882e-14
Gm17757	1.65804	1.83897e-05		Cd209a	-7.13963	1.94285e-14
Gbp8	2.5297	1.92274e-05		2010007H06Rik	-5.36627	2.14208e-14
Usp18	3.02813	1.92274e-05		Eif1ad	2.55604	2.40731e-14
Igtp	2.87402	1.92274e-05		Sipa1l1	-3.97407	2.54759e-14
Irg1	4.12542	2.35332e-05		Itga8	-3.64271	2.54759e-14
Mx1	3.98974	2.35332e-05		Rgs11	-3.96923	2.67506e-14
Tgtp2	3.24505	2.55476e-05		Slc2a4rg-ps	-3.91535	2.67506e-14
Ms4a4b	1.40564	2.55476e-05		Fst	5.48913	3.03725e-14
Cfb	3.14169	2.55476e-05		Irf7	5.23458	3.03725e-14
Gzmb	4.02146	2.71267e-05		Zbp1	5.56806	3.03725e-14
Eif2ak2	1.67637	2.86594e-05		Tbc1d30	-3.70982	3.05641e-14
Oas2	3.46421	2.86594e-05		Arrdc4	4.40349	3.05641e-14
Dhx58	2.63597	2.86594e-05		Faim2	-5.68058	3.05641e-14
Gm4951	3.4366	2.86594e-05		Slfn4	5.77578	3.05641e-14
H28	4.60884	2.86594e-05		9130015G15Rik	-4.41181	3.05641e-14
Stat1	1.7536	2.86594e-05		Rorc	-3.93902	3.05641e-14
Cxcl9	4.07418	2.86594e-05		Saa2	8.34775	3.27166e-14
Slfn1	2.32338	2.86594e-05		Fam198a	-5.39998	3.44651e-14
Ccl3	4.01838	2.86594e-05		Tuba1c	3.27356	3.53975e-14
Herc6	2.15459	2.86594e-05		Gm34552	-5.48393	3.53975e-14
H2-T24	1.49089	2.86594e-05		Gm31463	-4.8822	3.53975e-14
Gm8979	1.46563	2.86594e-05		Thbs1	5.55992	3.61935e-14
Zbp1	3.78061	2.97736e-05		Oxct2a	6.04003	3.68193e-14
Ccl2	4.23078	3.2288e-05		Apoc2	5.61033	3.68193e-14
D14Ertd668e	2.16196	3.2288e-05		Cnih2	3.31215	3.77188e-14
Gbp10	2.42391	3.2288e-05		Dcp2	3.76828	3.87137e-14
Gbp2	2.05447	3.32531e-05		Gm36107	5.24526	3.87137e-14
Oas1a	2.65831	3.40845e-05		Hao1	5.20516	3.87137e-14
Trim30a	2.15203	3.43466e-05		1700017B05Rik	3.36021	3.87137e-14
Rnf213	1.65493	3.73149e-05		Sort1	-2.92764	3.87137e-14
Oasl2	2.10843	3.821e-05		Mesp1	-5.17851	3.87137e-14
Rtp4	2.20055	3.8529e-05		Rmdn2	-3.26439	3.99409e-14
Parp14	1.46388	3.95562e-05		Clec5a	4.63659	4.37903e-14
Gm8989	1.49497	4.0355e-05		Csf3	8.78419	4.37903e-14
H2-Q6	1.72227	4.04714e-05		D3Ertd751e	-3.8583	4.45344e-14
Cd274	2.43551	4.25059e-05		6030458C11Rik	-3.49204	4.45344e-14
Fcgr1	3.59769	4.25059e-05		Hc	-6.8512	4.5367e-14
Timp1	3.55157	4.25059e-05		Ccl27a	-4.82531	4.87517e-14
Ms4a6d	3.49344	4.25059e-05		Kctd8	-4.53884	5.58404e-14
Psmb9	1.42464	4.62419e-05		Ppp1r9a	-5.57566	5.58404e-14
Stat2	1.86969	4.85363e-05		Zfp94	-4.48528	5.58404e-14
Oas3	3.31679	4.85363e-05		Ifnb1	10.8723	5.58404e-14
Pyhin1	2.87695	4.94424e-05		Nup50	3.2778	5.58404e-14
Ms4a6c	2.89983	4.96148e-05		Gm14005	3.3316	5.58404e-14
Slfn2	1.8714	5.36535e-05		Sspo	-3.89993	5.95754e-14
Xaf1	2.00625	5.41279e-05		Rap1gap	-2.80893	6.60459e-14
Ifih1	1.7015	5.52404e-05		Fosl1	7.85144	7.12527e-14
Apod	2.8733	5.58474e-05		Wnt3a	-7.31716	7.12527e-14
Irgm2	2.37299	5.58474e-05		Fcnb	5.60989	7.3917e-14
Gm4070	1.61249	5.58474e-05		1700109H08Rik	4.09892	8.94417e-14
Olfr56	1.87086	5.66949e-05		Tspan13	-3.03443	8.94417e-14
BC023105	2.12195	5.68338e-05		Car8	-4.84509	8.94417e-14
Apol9b	3.07457	6.17471e-05		Ms4a4a	4.95472	9.59754e-14
Irgm1	2.22028	6.22007e-05		Dpp4	-3.21795	9.92271e-14
Parp10	1.15537	6.22007e-05		Coa5	2.78011	9.92271e-14
Daxx	1.70174	6.22334e-05		Drd4	4.66215	1.04376e-13
Lgals3bp	1.63763	6.27937e-05		Ccl2	9.5623	1.09503e-13
Rsad2	3.67445	6.27937e-05		Tma16	2.70794	1.10651e-13
Klrk1	2.57055	6.54338e-05		Gstt1	-3.04974	1.15459e-13
Ddx60	2.41003	6.59633e-05		Sfxn4	-3.39266	1.15459e-13
Gbp1	2.06725	6.59633e-05		8430419K02Rik	4.49797	1.17254e-13
Ido1	2.08884	6.59633e-05		Agmo	-3.39384	1.18575e-13
Irf9	1.25047	6.59633e-05		Mt2	5.44642	1.2019e-13
Pml	1.10847	6.59633e-05		Bmp3	-3.77998	1.21207e-13
Gvin1	1.69326	6.59633e-05		Adamts4	8.01455	1.22472e-13
Lcn2	1.97042	6.59633e-05		Sec14l3	-4.36491	1.30596e-13
Ifi27l2a	2.80008	6.59633e-05		Slc44a3	-3.23422	1.44956e-13
Serpina3n	2.21042	7.0571e-05		Reps2	-2.46864	1.44956e-13
Tnip3	2.31899	7.64451e-05		Mlc1	-4.63365	1.44956e-13
Parp9	1.69657	7.64451e-05		C230037E05Rik	-3.99192	1.62461e-13
Ifi204	5.28301	7.66358e-05		Lcn2	4.93261	1.64194e-13
Parp12	1.32197	7.66358e-05		Vpreb3	-6.18799	1.64633e-13
Tap1	1.88738	7.66358e-05		Shd	2.95015	1.64633e-13
Trafd1	1.16717	7.8113e-05		Fgfr4	-3.11126	1.72074e-13
Gm6637	2.17331	7.95302e-05		Pla1a	6.1481	1.77826e-13
Dtx3l	1.57516	7.95302e-05		Pcolce2	-3.58241	1.77826e-13
Ifi44	3.10404	7.98567e-05		Pgf	3.97438	1.77826e-13
Iigp1	2.9271	8.21765e-05		Ifi44	5.06298	1.85141e-13
B4galt5	1.08752	8.34061e-05		C130090I23Rik	-3.95729	1.85677e-13
Ifi205	2.91426	8.88933e-05		Kcnip4	-3.52471	1.94083e-13
Trex1	1.59197	8.88933e-05		Greb1	-4.78462	2.0102e-13
Gadd45g	1.19413	9.30632e-05		Tspan2	-2.98857	2.0129e-13
Gbp11	2.95462	9.43448e-05		Pabpc1l	4.02321	2.03841e-13
Ifi202b	3.96735	9.43448e-05		Gm20300	-2.49181	2.05939e-13
Gm14446	2.73598	9.52136e-05		Zmat4	-5.15999	2.09081e-13
Pim1	1.3904	9.70887e-05		Mlkl	2.77347	2.15926e-13
Tap2	1.28394	9.70887e-05		Mfap3l	-3.50901	2.17765e-13
Nampt	1.29147	9.7698e-05		Cat	-3.39043	2.17765e-13
Ccl7	3.6972	9.7698e-05		Pcdhac2	-2.95306	2.17765e-13
Trim21	1.26708	9.83164e-05		9130017K11Rik	-3.26841	2.17765e-13
Ifit2	2.05606	0.000100515		Ces2b	-6.00367	2.2155e-13
Ly6c2	1.84867	0.000100691		Gm41666	-4.58307	2.24562e-13
Steap4	1.43317	0.000104337		Lamp3	-2.63855	2.24562e-13
Sdf2l1	1.12149	0.000108895		Gm5148	-4.49603	2.27484e-13
Cd14	1.5105	0.000108895		Tarm1	4.90252	2.27681e-13
Casp4	1.57905	0.000108895		Celsr3	5.57381	2.27681e-13
Tnfaip2	1.20941	0.000108895		Klhl8	-3.19396	2.28009e-13
Sbno2	1.0868	0.000108895		Hspa12b	-2.95065	2.32309e-13
Ddx58	1.2476	0.000108895		Ino80c	2.94593	2.32309e-13
Ms4a7	3.16944	0.00011004		Gpt	-2.77622	2.32309e-13
Isg15	2.68325	0.000113374		Amz1	-3.64836	2.32309e-13
Psmb10	1.06877	0.000113374		Aifm3	-3.36613	2.32309e-13
Gbp4	1.60693	0.000113374		Isg15	4.96883	2.32309e-13
Nlrc5	2.139	0.000113374		Arhgap12	-2.061	2.32309e-13
Sp100	1.1913	0.000113374		Wfikkn1	3.91206	2.32309e-13
F830016B08Rik	2.36153	0.000113374		Gm13889	3.19781	2.47056e-13
Fcgr4	3.04382	0.000115949		Bex2	-4.47811	2.47056e-13
Mnda	3.1023	0.000116379		Naa25	3.21566	2.60345e-13
Oas1b	2.19863	0.00011876		Slc39a14	3.54933	2.60345e-13
Gbp3	2.25057	0.000131844		Serpina3m	5.77572	2.66438e-13
Ccr5	3.20195	0.000140828		Tor1aip1	2.63765	2.66438e-13
Ppa1	1.32378	0.000140828		Rasa4	3.0635	2.66438e-13
Il10ra	1.69557	0.000141201		Mmp15	-3.07928	2.77594e-13
H2-T23	1.50213	0.000147454		2010001K21Rik	-3.39122	2.77786e-13
H2-Q4	1.541	0.000150406		Ppp1r26	-2.30508	2.77786e-13
Uba7	1.22362	0.000152717		Saa1	7.56791	2.77786e-13
Arg2	1.12931	0.000156358		Muc13	4.86169	2.88504e-13
Psmb8	1.59731	0.000167687		D630039A03Rik	-4.44744	2.95857e-13
Clec4a1	2.73319	0.000169253		Atp13a4	-4.87504	3.01036e-13
D17H6S56E-5	1.20761	0.000169253		Pappa	3.96869	3.06256e-13
Apobec1	2.33842	0.000169253		Pofut2	3.45187	3.06256e-13
Hsh2d	1.21261	0.000175441		Fabp1	-7.13889	3.06256e-13
H2-Q7	1.46437	0.000175441		Gpr176	5.31047	3.07066e-13
Tmem106a	1.28374	0.000175441		Zfp704	-3.10531	3.07604e-13
Lgals9	1.068	0.000175441		Gm19522	-4.23292	3.1927e-13
Muc4	1.2991	0.000175579		Zfp787	3.47216	3.22995e-13
Lgmn	1.1425	0.000176929		Tgm4	-3.31656	3.24617e-13
Mpeg1	1.62571	0.000176929		A630023P12Rik	-5.05665	3.34927e-13
Gm6907	2.05567	0.000176929		Tmem220	-3.0052	3.35315e-13
Mthfd2	1.34315	0.000179038		4930564I24Rik	3.47459	3.40412e-13
Gm12185	2.23916	0.000180105		Zfp612	-2.33048	3.40412e-13
Adar	1.1128	0.000180105		Hmg20a	-2.51133	3.46301e-13
Tlr9	2.23286	0.000186813		Vwce	4.71781	3.51991e-13
Gbp7	1.76332	0.000188484		Slc19a2	2.20364	3.51991e-13
Znfx1	1.38626	0.000193473		Lgals3bp	3.4799	3.63484e-13
C4b	1.0311	0.000193473		Vsnl1	-5.55087	3.66458e-13
Bst2	2.36144	0.000196566		Bcas1	-3.76946	3.66458e-13
Clec4d	1.53983	0.000209452		Bnipl	-3.07637	3.66458e-13
Ctps	1.08734	0.000209452		Wdr43	2.51311	3.675e-13
Klk1	2.83851	0.000209452		Scube2	-3.8149	3.675e-13
Tagap	1.17877	0.000209452		Ces1d	-2.94688	3.74393e-13
Ogfr	1.08644	0.000216038		Mctp2	3.78642	3.88374e-13
AW112010	1.75584	0.000218245		Zfp708	-3.04777	3.88941e-13
Tgfbi	2.03857	0.000232678		E430024P14Rik	-4.0157	3.88941e-13
Ly9	1.10116	0.000236588		Gm19412	4.15778	3.96065e-13
Siglec1	2.32561	0.000237794		Pdzk1ip1	-2.55326	4.01278e-13
Aif1	1.89527	0.000245248		Serpina3n	6.91807	4.02548e-13
Il1rn	1.44861	0.00024682		Hnmt	-3.60466	4.14809e-13
Tmem173	1.32278	0.000257561		Ecm2	-4.7269	4.1525e-13
H2-M3	1.10182	0.00025962		Gfpt2	4.00826	4.1525e-13
Tlr13	2.56205	0.00025962		Slc7a10	-4.04155	4.23889e-13
Fos	1.12347	0.000259921		E330009J07Rik	-2.25319	4.34401e-13
Parp11	1.26419	0.000262928		Gm15998	-4.15507	4.38126e-13
BC013712	1.89354	0.000263511		Gm13111	-4.46454	4.49837e-13
C1qb	1.47993	0.000263601		Slfn2	3.43004	4.55119e-13
Irf1	1.0079	0.000265912		Xaf1	2.90893	4.55119e-13
Il6	3.34508	0.000265912		Pomgnt2	-2.57894	4.55465e-13
Cdkn1a	1.07947	0.000280292		Hepacam2	-3.70021	4.55465e-13
Tnf	2.16748	0.000291475		Gm9465	4.34798	4.55465e-13
Clec4a3	2.23249	0.00029782		Atp2b2	-7.21842	4.61934e-13
Gm8995	1.27263	0.000299732		Gm32819	-3.81009	4.71225e-13
BC147527	2.35209	0.000299732		LOC105246088	-5.05952	4.71225e-13
Cd69	1.73371	0.000299732		Trafd1	2.28606	4.73334e-13
Slc15a3	1.62651	0.00031499		Pcmtd2	-1.98886	4.73334e-13
C3ar1	2.50621	0.000318215		Synm	-3.89804	4.73855e-13
Atf3	2.072	0.000326237		Cst8	-6.3998	4.85671e-13
Hck	1.20331	0.000328388		Zbtb46	-3.63799	4.90025e-13
Gm15987	1.29406	0.00033532		Hmga1	2.91842	4.97082e-13
Ptger4	1.02657	0.000335835		Ifit3	2.88761	5.02049e-13
Tlr7	1.76425	0.000346113		Pla2g4f	-3.48688	5.12965e-13
Cd72	2.24262	0.000351226		Zfp933	-2.35481	5.21542e-13
Serpina3f	2.04081	0.000359706		Gas7	3.3562	5.21542e-13
Il7r	1.02116	0.000360896		Fbxw10	3.52604	5.21542e-13
Gpr114	1.32746	0.000360935		Litaf	2.7996	5.29202e-13
Mt2	1.45375	0.000365214		Rasgrf2	-2.95734	5.38361e-13
Fcer1g	1.67023	0.000365214		Gm32688	-3.11499	5.38361e-13
Msr1	2.56889	0.000365214		Cbs	-4.16282	5.38361e-13
Clec5a	1.80913	0.000368268		Dynlrb2	-3.62678	5.38361e-13
AW011738	1.09611	0.000368268		Rnf38	2.65688	5.49078e-13
Irf8	1.11711	0.000379654		Oas3	5.77929	5.55109e-13
Oas1g	4.93283	0.000380161		Efhd2	2.35252	5.72711e-13
Pigr	1.29564	0.000380936		Ppp1r16b	-2.28077	5.74195e-13
Lst1	1.04651	0.000389897		Irf5	2.70127	5.74195e-13
Rgs1	1.95841	0.000394158		2610002M06Rik	-2.42328	5.74195e-13
Slfn9	2.75688	0.000396423		Pclo	-4.71018	5.74195e-13
Thbs1	1.68	0.000400831		Ifit2	3.58926	5.82165e-13
Mlkl	1.6603	0.000400831		Stmn2	-3.74639	5.86967e-13
H2-Q5	1.68635	0.000400831		Tlr13	3.74931	6.00038e-13
Nuak2	1.04308	0.000410754		Oas1a	3.9946	6.00038e-13
Gm10417	-1.023	0.000410754		Tnip3	4.85108	6.06652e-13
F3	1.02687	0.000411339		Prdm2	2.22485	6.13507e-13
Klrd1	1.44014	0.000412428		Pcbd1	-2.32779	6.27668e-13
Mndal	1.33505	0.00041905		Trex1	3.14467	6.37343e-13
Sh3bp2	1.3936	0.000419653		Osbpl6	-3.44701	6.37343e-13
Il18bp	1.39941	0.000427389		Mamdc4	-3.9876	6.37343e-13
Mitd1	1.24465	0.000434681		Aldh1a7	-5.02309	6.42623e-13
Rnf19b	1.14324	0.000435648		1110038B12Rik	2.50492	6.42623e-13
C130026I21Rik	1.57821	0.000437931		Gkn3	-3.40349	6.42623e-13
A430084P05Rik	2.28495	0.000437931		Myd88	2.04764	6.59957e-13
Cldn4	1.38186	0.000440891		Dnmt3a	-3.66399	6.69474e-13
Fgl2	1.17727	0.000450608		Cstb	2.80473	6.71691e-13
Egr1	1.23208	0.000454229		Ttc39b	3.16227	6.77162e-13
C2	1.00895	0.000454229		Ifi202b	5.42479	6.83857e-13
C1qa	1.42501	0.000456722		Pstpip1	3.28557	6.88571e-13
Junb	1.04395	0.000456722		Ccdc86	2.51102	6.99957e-13
Il2ra	1.43948	0.000456722		Phf11d	3.06701	7.06526e-13
Gzma	1.97623	0.000456722		1810010H24Rik	-3.66714	7.19712e-13
Ptprc	1.02503	0.000456722		Ephx1	-2.98468	7.19712e-13
Hcls1	1.24217	0.000456722		Sgpp2	-4.46491	7.19712e-13
Epsti1	1.97404	0.000456722		Zfp760	-2.76149	7.19712e-13
Sp110	1.14713	0.000456722		Rtp3	-5.05218	7.19712e-13
Gch1	1.05241	0.000456722		Plekhb1	-2.97621	7.19712e-13
Il12rb2	1.32117	0.000456722		Lilrb4	3.56007	7.20877e-13
H2-T22	1.5934	0.000459426		Gm33188	-3.63834	7.21076e-13
Nkg7	1.42083	0.000466007		Amica1	3.05656	7.30585e-13
Vcan	1.63853	0.000473331		1810032O08Rik	2.43759	7.53263e-13
Mt1	1.08515	0.000489589		2700012I20Rik	-2.60453	7.95918e-13
Setdb2	1.22104	0.000489589		Mblac2	-2.35897	8.18589e-13
Lrg1	1.07871	0.000499729		Apbb3	-1.6992	8.18589e-13
Ccr2	1.76057	0.000504029		Sdcbp2	3.63518	8.34786e-13
Nt5c3	1.26118	0.000504029		Tmprss4	-2.39695	8.3758e-13
Trim30b	1.31929	0.000504029		Ttc29	-4.01064	8.79445e-13
C1qc	1.18356	0.000504029		Ces2e	-6.51129	8.84579e-13
Cxcr2	1.06888	0.000506256		Neu2	-3.13155	8.84579e-13
Gpnmb	1.74429	0.000506256		Cenpw	3.01118	8.84579e-13
Lair1	2.15719	0.000506256		Hhip	-3.65374	8.84579e-13
BC006779	1.18261	0.000507807		Mx1	6.59727	8.84579e-13
Ptafr	1.72502	0.000507807		Pik3r3	-2.90916	9.08867e-13
Cd80	1.11783	0.000507807		9130403I23Rik	-2.03689	9.22729e-13
Trem3	1.17435	0.000507807		Kcna6	-4.79943	9.22729e-13
Casp1	1.16762	0.000514475		Atf3	4.29673	9.22729e-13
LOC100038947	2.37952	0.000514475		Rgs1	5.19939	9.33828e-13
Ccr1	1.76775	0.000516304		Uros	-2.96788	9.46484e-13
Vav1	1.42969	0.000516726		Usp18	3.06834	9.46484e-13
Retnla	3.55567	0.000532152		Smarcal1	-4.60781	9.46484e-13
Tcirg1	1.08084	0.0005323		Tmem14a	-2.82016	9.57958e-13
Fam26f	1.48704	0.000534976		Senp5	2.40871	9.57958e-13
Ms4a4a	2.26261	0.000543557		Sbno2	2.55755	9.57958e-13
Ch25h	3.21636	0.000544718		Ufd1l	1.97893	9.58604e-13
Ifi203	1.29634	0.000545457		Sh3pxd2b	2.95919	9.61156e-13
Ctss	1.43433	0.000545457		Zfp72	-4.51114	9.61156e-13
Slc7a5	1.23516	0.00054593		Plekhd1	-4.33165	9.83883e-13
Il1r2	1.24618	0.00054955		9230117E06Rik	-7.26465	9.84751e-13
Bcl3	1.41561	0.00055074		Pgm2l1	-2.50472	9.84751e-13
Irf5	1.01261	0.000554767		Ccdc146	-5.22118	9.86491e-13
Sema4d	1.16215	0.000554767		2900060B14Rik	4.86751	9.93039e-13
Gm20559	1.00667	0.000564375		Rab20	3.04557	1.0034e-12
AI607873	1.85034	0.000564841		Sec14l4	-4.04903	1.01846e-12
Nfkbie	1.21116	0.000569128		Il17ra	2.82086	1.01846e-12
Ccl12	1.75522	0.00057556		Dnali1	-4.43737	1.02411e-12
Cxcl16	1.07007	0.00057556		AI594674	-3.52736	1.02411e-12
Xcl1	1.91441	0.000585828		Ccdc108	-4.0148	1.03272e-12
Tor3a	1.19476	0.00058766		Sphk1	3.28427	1.03272e-12
Il2rb	1.84622	0.00058766		5330417C22Rik	-4.62261	1.04703e-12
9930111J21Rik2	1.07503	0.000598151		Plk5	-4.57027	1.05433e-12
Clec12a	2.05642	0.000607467		Srcin1	-3.86369	1.05433e-12
Klra2	1.8464	0.000617112		Slc4a5	-6.08476	1.05433e-12
Bcl2a1b	1.11105	0.000623932		9030622O22Rik	-3.55476	1.05433e-12
Selplg	1.07273	0.000623932		Nhp2	1.97769	1.05557e-12
Snx10	1.07833	0.000623932		Adrbk2	-2.26502	1.05557e-12
Slc7a8	1.5946	0.000628566		Nfil3	4.69953	1.07351e-12
Cd300lf	1.36589	0.000628566		Selp	5.50736	1.07351e-12
Serpine1	1.23672	0.000642628		Rnf19b	2.87017	1.12013e-12
Fyb	1.35722	0.000649157		Zfp251	-2.1399	1.14145e-12
Cd53	1.14833	0.000658091		Nufip1	1.8972	1.14145e-12
Cxcl1	1.58078	0.000669283		Gm31105	-3.18396	1.14145e-12
Fcgr2b	1.57821	0.000673123		Il11	4.7229	1.1499e-12
Treml2	1.09398	0.000675065		Rnf32	-3.15447	1.16251e-12
Slc39a14	1.12436	0.000693798		Myc	4.04462	1.18219e-12
Car13	1.17503	0.000694704		Xpo4	2.79698	1.19157e-12
Slamf7	1.87749	0.000709254		Stx11	2.25933	1.19157e-12
Ly86	1.37929	0.000714336		1500012F01Rik	2.44512	1.19157e-12
Bcl2a1d	1.09951	0.000714606		Sdpr	-2.30135	1.19157e-12
Selp	1.56645	0.000714606		Tnfrsf12a	4.04889	1.19311e-12
AF251705	1.40014	0.000719803		Abhd14b	-2.46203	1.20167e-12
Lcp2	1.24484	0.000725075		5930430L01Rik	-2.95144	1.20311e-12
Lilrb4	1.74543	0.000755002		Gm10099	4.21383	1.20372e-12
Lilrb3	1.49707	0.000795876		Fabp12	-3.55124	1.20633e-12
AI662270	1.25575	0.000798156		Enc1	3.14486	1.20633e-12
Cd86	1.44652	0.00080004		Stxbp4	-3.39617	1.23103e-12
Slfn3	1.7039	0.000803423		Tor3a	2.76714	1.23683e-12
A530064D06Rik	2.03322	0.000806881		Meig1	-3.84392	1.24842e-12
Rasa4	1.24524	0.000808065		Rcan2	-3.07133	1.24842e-12
Nr4a3	1.27804	0.000816957		Steap2	2.00137	1.25168e-12
Gm6548	1.50396	0.000816957		Zfp953	-3.18229	1.26818e-12
Pik3ap1	1.08257	0.000828255		Ptpn2	1.6585	1.26818e-12
Itgam	1.51082	0.000841532		Dmp1	5.47407	1.26818e-12
Hpse	1.35246	0.000841532		Tfcp2	-2.47729	1.27786e-12
Cd180	1.79668	0.000843685		Hmgcr	2.98372	1.27801e-12
Serpinb9b	1.18314	0.000845771		Mrps18b	1.73693	1.28113e-12
Mmp8	2.02223	0.000846987		LOC105247169	1.91282	1.28113e-12
Emr1	1.40257	0.000850876		C130046K22Rik	-3.19647	1.28253e-12
Gm19585	1.16163	0.000850993		Rdm1	-2.86453	1.28253e-12
Cd52	1.03732	0.000853616		Tnfaip3	3.4519	1.28253e-12
Ms4a8a	1.47088	0.00086		Zfp963	-1.84914	1.29792e-12
Glycam1	-2.67544	0.00086		Tubb6	3.11851	1.29923e-12
Isg20	1.23464	0.00086		Wnt10b	-3.46251	1.35103e-12
Klri1	1.43761	0.000902431		Trem3	3.07005	1.35351e-12
Gm10499	1.1985	0.000945359		Zfp458	-4.96444	1.35351e-12
Retnlg	1.65737	0.000945988		Gm31080	-3.10125	1.35351e-12
Gp49a	2.5367	0.000946397		Mmd	2.54609	1.35351e-12
Il21r	1.07803	0.000966481		Irgm1	2.654	1.35351e-12
Sirpb1a	1.4371	0.000971272		Adat2	2.02597	1.35626e-12
Amica1	1.26202	0.000973733		Il1r2	7.69651	1.35626e-12
Cyth4	1.11014	0.000976544		E030019B13Rik	-4.28557	1.39884e-12
Slfn8	1.19498	0.000983627		Plekhg4	2.86342	1.46355e-12
Gm4841	3.15232	0.000986345		1810020O05Rik	-3.2179	1.46355e-12
Cd68	1.34043	0.00100375		Cldn8	-4.17086	1.46355e-12
BC094916	2.77676	0.00100833		Itga5	3.12141	1.46355e-12
I830077J02Rik	1.17262	0.0010113		Tap1	2.8405	1.47437e-12
Aim1	1.05033	0.0010113		Nrip3	3.52812	1.48617e-12
Clec7a	1.27804	0.0010123		Clmp	3.47769	1.49703e-12
Aoah	1.68314	0.00101382		Gbp2	2.97511	1.49703e-12
Stfa2l1	2.27114	0.00102199		Cachd1	-2.37775	1.49703e-12
Klri2	1.39975	0.00102878		Apod	6.15574	1.49703e-12
Sirpb1b	1.96838	0.00105127		Bst2	2.99945	1.49882e-12
Tnfaip3	1.08053	0.00105151		Gstm1	-2.94655	1.49924e-12
Slc26a4	1.77874	0.00105151		Rnf149	2.55852	1.50632e-12
Fkbp5	1.11803	0.00105233		Pcdh18	-2.34614	1.51979e-12
Tnc	1.08576	0.00105283		Tmem163	-2.99888	1.51979e-12
Pla2g7	1.47893	0.0010533		Marcksl1	2.55584	1.54795e-12
Tyrobp	1.2096	0.0010533		Oas2	3.87048	1.55377e-12
Csf3r	1.01961	0.0010533		Aass	-6.19765	1.55377e-12
Fgr	1.28647	0.00108021		Iqcc	-2.26141	1.58543e-12
Plek	1.17032	0.00108879		Ifitm3	2.24914	1.61102e-12
Hmgcs2	-1.16365	0.00108902		Rac1	1.86146	1.63593e-12
Cxcl11	4.11444	0.00110205		Rapgefl1	-3.18051	1.63863e-12
Prf1	1.27754	0.00111202		Thrb	-2.53379	1.65255e-12
Cxcl17	1.15947	0.00111202		Cntn1	-4.0281	1.66708e-12
Klrc1	1.32061	0.00112115		Eif1a	1.62278	1.66708e-12
Emilin2	1.04417	0.00114859		Irs1	-2.63395	1.66735e-12
Pld4	1.57077	0.00118459		Stfa3	9.60268	1.67443e-12
Slc11a1	1.39104	0.00118459		Oasl1	5.55192	1.67699e-12
Dck	1.32408	0.00121367		N4bp2l1	2.7249	1.67807e-12
Atp10a	1.03683	0.00122096		St8sia4	-2.21746	1.68587e-12
Atp8b4	1.18234	0.00122222		Tnfrsf1b	2.51627	1.69795e-12
Ms4a6b	1.71626	0.00122833		Hpx	2.94681	1.70047e-12
Sectm1a	1.74797	0.00124637		Ubap1	2.09777	1.71039e-12
Nrxn2	-1.11259	0.00124733		Hnrnpdl	1.9249	1.71903e-12
Tbx21	1.03537	0.00126303		Tgfbi	3.19632	1.71903e-12
Socs1	1.69981	0.00126365		Mycbpap	-4.62245	1.72143e-12
Ptpn22	1.32486	0.00127784		Elmo1	2.87936	1.72217e-12
Myo1f	1.13527	0.0012862		Zfp354b	-4.40681	1.72369e-12
Gpr65	1.90706	0.00129008		Rbm33	1.93102	1.72369e-12
Evi2a	1.10757	0.00130215		Nrbp2	-2.25335	1.72884e-12
Cybb	1.10313	0.00132781		Snhg3	2.0005	1.72884e-12
Tifab	1.19123	0.00133252		Agpat9	2.23877	1.74795e-12
Glp1r	-1.28861	0.00133308		Fam120b	-3.97074	1.78423e-12
B430306N03Rik	1.62925	0.00133553		Gm10378	-4.50691	1.78977e-12
Trim30c	2.57266	0.00134668		Bpifb5	-4.36884	1.7945e-12
Tnfrsf12a	1.08261	0.0013762		Fbl	1.60231	1.7945e-12
Lpxn	1.43971	0.00137856		1190007I07Rik	-2.90706	1.80757e-12
Ccl4	1.35783	0.00139458		Pcdh12	-4.12533	1.81912e-12
9330175E14Rik	1.11224	0.00145754		Hspa4	1.75216	1.82686e-12
Gm6904	1.92398	0.00146493		Apol9a	4.66121	1.8332e-12
I830012O16Rik	1.68154	0.00148097		Sema3e	-4.38817	1.8332e-12
5430437J10Rik	1.84138	0.00152283		Otud3	2.50792	1.83728e-12
Apol9a	1.1299	0.00152355		2610507I01Rik	-5.06346	1.84132e-12
Csf2rb2	1.34398	0.00153756		Agap1	-2.26426	1.8515e-12
Tlr2	1.26399	0.00158063		Sdc4	2.60007	1.8515e-12
Runx3	1.11463	0.00158063		Tceal1	-2.77812	1.86633e-12
AB124611	1.41884	0.00158163		Smad9	-2.16543	1.88115e-12
Ccl9	1.29196	0.00162794		1700025G04Rik	-2.63928	1.92816e-12
Mmp13	1.08222	0.0016291		Traf1	-3.25339	1.93158e-12
Csf1	1.03659	0.00171569		Svip	-2.15517	1.94484e-12
Cd48	1.00357	0.00172261		Cntn4	-3.29665	1.94744e-12
Ptpn6	1.00359	0.00175223		D15Ertd509e	-2.9366	1.95502e-12
Klrb1f	1.26565	0.0017999		Saa3	8.90572	1.95502e-12
Tlr1	1.43737	0.00185376		Cckar	-6.64756	1.95502e-12
Fap	1.35306	0.0018703		Vcan	5.1828	1.98587e-12
Slamf9	1.5552	0.00193719		Galnt16	4.7191	1.98587e-12
Tigit	1.04145	0.0020105		Tle2	-2.95065	1.98641e-12
LOC100861753	1.33756	0.00204479		6330403K07Rik	-4.37576	2.01575e-12
Socs3	1.33265	0.00206407		Zfp467	-3.44972	2.03851e-12
Trim30d	2.62248	0.00206507		Fcgr1	4.74577	2.09159e-12
Gm19765	1.27841	0.00207947		F3	3.52952	2.12559e-12
Serpina3h	1.00006	0.0021053		Cd63	1.60504	2.14964e-12
Mrgpra2a	1.2002	0.00212585		Gstm3	-2.89668	2.17142e-12
Ccl8	1.47374	0.00212585		Pcmtd1	-2.08653	2.21784e-12
Gm15056	1.96496	0.00212585		Gsta4	-2.79137	2.24006e-12
Clec4e	1.9567	0.00225333		D2hgdh	-2.42692	2.29581e-12
Il18rap	1.26241	0.00226165		Rhoc	1.89755	2.2976e-12
Tnfrsf1b	1.19595	0.00228162		Enpep	-2.41506	2.2976e-12
Myc	1.01674	0.00229161		Sntn	-4.87601	2.2976e-12
Cpm	-1.03333	0.00229161		Slc26a9	-3.58337	2.2976e-12
Ccl5	1.91127	0.00232908		Gm11696	-2.48326	2.2976e-12
Fpr2	1.07177	0.00233018		4930447I22Rik	4.54203	2.32414e-12
Cd177	1.29342	0.00236066		Rrp15	1.82323	2.32414e-12
Nlrp3	1.03854	0.00237478		Grb7	-2.80183	2.32414e-12
5430427O19Rik	1.11284	0.00241233		Abcd3	-1.55302	2.33195e-12
Gatm	1.62246	0.00241761		Slfn10-ps	3.18936	2.38676e-12
Ifitm6	1.67598	0.00243541		Acot11	-2.26914	2.38676e-12
Gpr31b	2.18065	0.00245174		Tsga10	-2.50305	2.38877e-12
Hspa1a	1.30212	0.0024741		Camk2d	2.48528	2.39828e-12
Ncf4	1.39338	0.00251125		Zfp93	-3.0767	2.40102e-12
Igsf6	1.4732	0.00252026		Pltp	-3.37764	2.40102e-12
Mafb	1.12927	0.00252026		Tex10	1.72957	2.40102e-12
Ly6c1	1.97919	0.0025741		Nrn1	-4.24442	2.43672e-12
Krt17	1.1705	0.00287345		Kcne4	4.88649	2.45667e-12
Ms4a4c	2.47534	0.0029363		Pex10	-2.30241	2.45667e-12
Ncr1	1.37511	0.0029363		Raver2	-1.73967	2.45667e-12
Igfbp3	-1.16706	0.00301708		Vars2	-1.98811	2.4629e-12
Adam8	1.05332	0.00306063		2210011G09Rik	-4.09116	2.4629e-12
Gpr141	2.59096	0.00314287		Rgl3	-2.54293	2.4629e-12
Slc37a2	1.16918	0.00316101		F730035M05Rik	4.24598	2.4629e-12
Ctsw	1.17412	0.0032455		Aard	-4.28609	2.47949e-12
Lrrc25	1.29013	0.00350459		LOC102641570	-3.35372	2.48e-12
Cxcl5	1.37124	0.00351397		1700026D08Rik	-3.40278	2.48e-12
Cd7	1.1958	0.00364773		Ngef	-3.06596	2.4955e-12
Slc7a11	1.05615	0.00383607		Ccl7	8.13977	2.56567e-12
Orm2	1.25305	0.00387448		Crebzf	-2.52672	2.62757e-12
Rgs16	1.59542	0.00393206		Snhg6	2.28722	2.62757e-12
Cxcr6	1.11332	0.00421732		Il18bp	3.52006	2.63453e-12
Pydc4	1.57207	0.0045303		1600029I14Rik	-4.20153	2.64738e-12
Cd300e	1.20351	0.0045567		2900054C01Rik	-3.78662	2.68917e-12
Gm885	1.17765	0.00470175		Rasgef1a	-2.48503	2.68917e-12
Tbc1d9	1.00911	0.00472633		Gnpat	-1.86604	2.70583e-12
Gm5150	1.13717	0.00482152		Gm10824	-3.43	2.70583e-12
LOC100862132	1.18985	0.00497209		Osmr	2.1135	2.71149e-12
Chrdl1	-1.05918	0.00499974		Tmem50b	-1.84841	2.72842e-12
S100a8	1.50285	0.00505725		2310081O03Rik	3.62665	2.72842e-12
Itih4	1.12444	0.00522384		Ddc	-3.19782	2.72842e-12
Cyp4f18	1.07895	0.00542099		Zfp563	-5.30511	2.72842e-12
Hal	1.26415	0.00545937		Cfap61	-5.18311	2.72842e-12
I830127L07Rik	1.17371	0.00564966		Haus2	2.46415	2.72842e-12
Naip2	1.44874	0.00636155		Utrn	-1.86401	2.72842e-12
Fcrl5	1.32337	0.0065234		4930555K19Rik	-1.69915	2.7328e-12
Klrg1	1.10655	0.00709598		Armcx1	-2.0354	2.7328e-12
Hist1h1b	1.68284	0.00883885		Gm34188	-3.36302	2.7328e-12
Ccl20	1.08846	0.0107931		Srr	-1.82754	2.7476e-12
Gm19984	1.04057	0.0125383		Sh2d5	2.67479	2.77316e-12
A630012P03Rik	1.13151	0.0125625		Susd4	-2.75614	2.78207e-12
Gpr84	1.26633	0.0126726		LOC628205	-2.54055	2.80323e-12
Klrb1a	1.01138	0.012809		Oas1g	5.04989	2.80323e-12
Gm20234	1.15481	0.0133799		BC010981	2.13394	2.8189e-12
Ms4a14	1.13526	0.0134984		Stxbp5	-2.49427	2.8189e-12
Abcb1b	1.07001	0.0140868		Nfe2l2	-2.20792	2.8189e-12
Gm11428	1.36878	0.0146181		Exosc9	1.9174	2.8189e-12
Hspa1b	1.73702	0.0146779		Fam209	3.83328	2.8189e-12
Clca1	1.10528	0.0147627		Rnf186	-4.46457	2.82487e-12
Gm6377	1.22342	0.0154198		Kcnq1	-2.39164	2.83286e-12
Olfr170	1.34625	0.0163807		Spice1	-3.51537	2.87804e-12
Tcrg-V6	1.50164	0.0168878		Etf1	1.85726	2.89249e-12
Cd5l	1.1113	0.0181486		Fgf1	-3.57743	2.90717e-12
LOC100504898	1.12219	0.0184429		Apln	-3.52992	2.98582e-12
Ly6g	1.10834	0.0205628		Npm2	1.86577	3.00632e-12
Agr2	1.47899	0.0219411		Spag6	-3.1585	3.00632e-12
Ifnb1	1.04236	0.0225097		Aplnr	-2.60232	3.02177e-12
Reg3g	1.74951	0.0246614		Mrps7	1.54391	3.03344e-12
Cyp1a1	-1.201	0.0280141		Mtcl1	-3.06342	3.07091e-12
Tnni2	-1.25149	0.029401		Zfp60	-4.31791	3.08226e-12
Alas2	-1.40683	0.0349263		Dcun1d2	-2.35209	3.08605e-12
				Lrrc23	-5.3819	3.1032e-12
				Apol8	7.90752	3.11632e-12
				Trim30d	2.46521	3.13632e-12
				Cp	2.30578	3.17511e-12
				Glrx	2.79782	3.18325e-12
				Fam92b	-5.80456	3.1866e-12
				Tspan12	-1.90903	3.2156e-12
				Klhdc8b	-2.88197	3.22144e-12
				Odf3b	-3.22011	3.23239e-12
				Il13ra1	2.10139	3.26681e-12
				Atp6v1c2	-3.47811	3.35559e-12
				Ppp1r14c	-4.04288	3.3918e-12
				Aen	1.89235	3.4135e-12
				Ror2	2.58466	3.4135e-12
				Atp8a1	-1.97292	3.41742e-12
				Wfdc18	2.79962	3.41742e-12
				Rdh5	-1.64957	3.41742e-12
				Tex11	-5.33927	3.42296e-12
				Mamdc2	-2.27818	3.43448e-12
				Mctp1	3.19549	3.45186e-12
				Zfp454	-3.3941	3.49049e-12
				Ackr4	-6.5354	3.4941e-12
				Ccdc155	-3.68983	3.4941e-12
				Pno1	1.98638	3.4941e-12
				Rgs22	-3.60507	3.4941e-12
				Cst13	-4.38044	3.49722e-12
				LOC102639385	-3.17624	3.50805e-12
				Gm9917	-2.81466	3.52153e-12
				LOC102635844	-3.70687	3.53664e-12
				Snx25	-2.69693	3.55347e-12
				Birc3	2.6597	3.63155e-12
				Ap4b1	1.61414	3.66871e-12
				Fam132b	4.87693	3.66871e-12
				D7Bwg0826e	5.09795	3.66871e-12
				Tnfrsf23	2.53354	3.67162e-12
				Tgif1	2.7691	3.74004e-12
				Igip	-2.98124	3.7632e-12
				Fzd7	-1.90381	3.7632e-12
				Slc9a7	-2.65705	3.77876e-12
				Gm33248	-4.89692	3.79468e-12
				Defa-rs2	2.54227	3.79468e-12
				Glcci1	-2.0641	3.81933e-12
				Adamts2	2.5976	3.84188e-12
				Stra6l	3.19365	3.95305e-12
				Dzank1	-2.49596	3.9755e-12
				H2-T9	2.14563	4.00187e-12
				3300002A11Rik	-2.98307	4.00511e-12
				Sez6l2	2.28016	4.00511e-12
				Morn2	-2.23755	4.00559e-12
				Mdh1b	-3.92547	4.01108e-12
				Snhg11	-4.05627	4.06917e-12
				Cxcl10	8.67912	4.06917e-12
				Ccdc17	-2.51636	4.06917e-12
				Abtb2	2.78925	4.08372e-12
				Dusp3	-1.96386	4.10983e-12
				Creb3l1	3.16701	4.1252e-12
				Nolc1	1.81447	4.14493e-12
				Gm38508	4.06678	4.15379e-12
				Klhl42	-2.18024	4.15379e-12
				Rabgap1l	-2.2934	4.16655e-12
				Clec4e	5.12926	4.19363e-12
				Emilin2	3.59428	4.25028e-12
				Cybrd1	-3.15204	4.26209e-12
				Car13	3.76324	4.29035e-12
				Glipr2	2.89159	4.29886e-12
				Fam161b	-4.18785	4.31516e-12
				Nap1l3	-2.55975	4.32605e-12
				Uck2	1.92502	4.38919e-12
				Arid5a	3.25224	4.39345e-12
				Hnrnpul2	-2.18314	4.40459e-12
				Kctd1	-2.90168	4.417e-12
				Zfp81	-2.77925	4.42168e-12
				Klhl38	-3.13905	4.42638e-12
				Socs3	4.01721	4.4584e-12
				Cftr	-3.02899	4.46943e-12
				4833411C07Rik	-3.49035	4.4964e-12
				Pde5a	-2.26597	4.51013e-12
				Etv5	-2.76005	4.51046e-12
				Hist2h2bb	-4.33692	4.51121e-12
				Zfp780b	-2.08021	4.51121e-12
				Phkb	-2.90802	4.51329e-12
				Ccdc37	-3.81659	4.51506e-12
				Pus1	1.72748	4.53189e-12
				Ccdc78	-3.01177	4.55811e-12
				Slc16a7	-5.51095	4.62483e-12
				H2-M2	1.90285	4.62483e-12
				Msantd3	2.25518	4.62664e-12
				Mapre2	-2.52144	4.6329e-12
				Lpcat1	-2.11311	4.69027e-12
				Gosr1	2.09387	4.70947e-12
				Mmp14	2.62933	4.7095e-12
				Tomm20	1.83601	4.78275e-12
				Slc9a3r2	-2.0354	4.78497e-12
				Sirpb1b	3.77787	4.78497e-12
				St6galnac2	-2.28841	4.82632e-12
				Prr30	5.31813	4.82632e-12
				Gm14167	3.2107	4.86785e-12
				Timm23	1.81431	4.86785e-12
				Gm28321	3.59256	4.87526e-12
				Fam131a	-2.68711	4.93777e-12
				Syne2	-2.05909	5.00607e-12
				Cxcl15	-3.14492	5.01086e-12
				Zkscan8	-2.19741	5.01086e-12
				P2ry2	2.84162	5.01086e-12
				Txnl1	1.53238	5.0249e-12
				Cers4	-2.09605	5.0249e-12
				Rnf43	-2.484	5.03596e-12
				E030013I19Rik	-5.37015	5.09584e-12
				Dnah10	-3.93691	5.12113e-12
				Nmd3	2.13056	5.13579e-12
				Ifit3b	2.32765	5.16095e-12
				Gars	1.54586	5.16508e-12
				Reck	-1.72031	5.16508e-12
				Atxn1	-1.84166	5.18556e-12
				Trim30a	2.21934	5.19806e-12
				Lgi3	-6.27921	5.2197e-12
				2900001G08Rik	-3.03796	5.22101e-12
				Egfr	1.79508	5.22101e-12
				Scn3a	-3.86574	5.22101e-12
				Timp1	7.43383	5.24153e-12
				Tinag	-3.30454	5.25403e-12
				Dbndd1	-3.16105	5.25403e-12
				Sap30bp	1.87304	5.30334e-12
				Dyrk2	2.56742	5.43224e-12
				9530036O11Rik	-2.92032	5.44767e-12
				Tspyl4	-2.69277	5.46176e-12
				Myh7	-3.3092	5.47792e-12
				Kank3	-2.68684	5.5425e-12
				Tnn	-2.98249	5.5425e-12
				Cks2	2.26562	5.5425e-12
				AA467197	6.34215	5.5425e-12
				Ift80	-2.45009	5.5425e-12
				Zfp385b	-5.12894	5.5425e-12
				H2-K1	1.69971	5.5425e-12
				Zbtb26	-2.40993	5.5425e-12
				Gstz1	-2.76407	5.56827e-12
				Klhl24	-2.00523	5.57554e-12
				Col4a4	-3.0875	5.6348e-12
				Nckap5	-2.67758	5.69672e-12
				Gprasp2	-4.93513	5.7272e-12
				Gm11734	-3.41402	5.77414e-12
				Dpep3	4.12789	5.77747e-12
				Col4a5	-2.87107	5.7959e-12
				Mthfsd	-2.49318	5.82986e-12
				Spef2	-3.12182	5.84395e-12
				Rab3a	-3.07731	5.92275e-12
				Alkbh1	1.86014	5.92275e-12
				LOC105245924	-2.52415	5.92275e-12
				Pde10a	3.83579	5.93677e-12
				Bloc1s2	1.34343	5.93677e-12
				Noc4l	1.75031	5.93677e-12
				Ppp1r2	2.3024	6.02874e-12
				Tmem56	-2.69403	6.0473e-12
				Tnc	5.31893	6.05672e-12
				Cbx6	-2.14583	6.10487e-12
				Dhdh	-2.20694	6.11826e-12
				Gm32633	-1.72709	6.13864e-12
				Hydin	-3.77989	6.1501e-12
				Clec4d	4.11131	6.28473e-12
				Tgm1	3.67513	6.29526e-12
				Tmem30c	3.978	6.32686e-12
				Gprin3	-3.17119	6.46102e-12
				LOC102641211	-6.30416	6.50665e-12
				Unk	-1.60554	6.55813e-12
				Inpp4b	-2.41707	6.62055e-12
				Il1rn	3.06983	6.62756e-12
				Col4a6	-3.05603	6.62756e-12
				Dync1li2	-2.071	6.69663e-12
				Cyb5d2	-1.85823	6.70371e-12
				Fbxo9	-1.82286	6.70956e-12
				Tril	-5.11667	6.73341e-12
				Mcoln2	4.03914	6.73341e-12
				Themis	-3.43735	6.83866e-12
				Ogfr	2.01034	6.86876e-12
				Zfp712	-3.10152	6.89959e-12
				Gjb6	-4.48522	6.89959e-12
				Rbpj	1.54596	6.89959e-12
				Ifi44l	3.94188	6.9045e-12
				Zfp113	-2.18328	6.92614e-12
				Abcb9	-1.50188	6.98886e-12
				Zswim7	1.56555	6.98886e-12
				Fap	3.35502	6.98993e-12
				Tshb	-4.15483	7.03734e-12
				Spink4	-4.30655	7.03808e-12
				Eif2s2	1.98865	7.03808e-12
				1700124L16Rik	4.29417	7.05204e-12
				Slc5a12	-5.56411	7.05204e-12
				Slc7a4	-2.90479	7.09488e-12
				Tmem132c	-3.02781	7.13042e-12
				Defa-rs7	2.12206	7.13363e-12
				Aktip	-1.98579	7.23842e-12
				Clca3a2	4.7138	7.29142e-12
				Phxr1	2.02467	7.29142e-12
				Cep41	-2.33756	7.30147e-12
				Adgra2	-1.67087	7.34496e-12
				Stfa1	8.38082	7.35963e-12
				Ereg	8.7751	7.57141e-12
				Ly6i	3.77114	7.605e-12
				Crlf2	2.05197	7.605e-12
				Ripk3	2.64386	7.62129e-12
				Mmaa	-2.44647	7.62129e-12
				Epb4.1l4a	-2.42708	7.65343e-12
				Shprh	-2.07075	7.68516e-12
				Fnbp4	1.67928	7.68516e-12
				Cyr61	2.88866	7.68516e-12
				Fam207a	2.05805	7.81507e-12
				Ap2a2	2.27666	7.82298e-12
				Gimap1	-3.03331	7.82298e-12
				Mettl4	-1.89893	7.82298e-12
				Acss1	-3.85838	7.82298e-12
				D030029J20Rik	-1.75327	7.8442e-12
				Vtn	-2.51154	7.8681e-12
				Slco2b1	-3.09752	7.88261e-12
				Fuz	-3.31048	7.88261e-12
				Gorasp2	1.49888	7.93539e-12
				Tatdn2	2.39877	7.93539e-12
				Gm16499	-4.11088	7.96207e-12
				Pla2g7	3.52517	8.01709e-12
				Calcrl	-2.17624	8.07905e-12
				Igsf6	3.19512	8.10328e-12
				Nus1	1.8188	8.23941e-12
				Mefv	4.21885	8.23941e-12
				Gch1	2.87122	8.27544e-12
				Dhx58	3.40126	8.332e-12
				Fam120c	-2.85791	8.33685e-12
				H2-T22	2.35455	8.38851e-12
				Yipf6	-1.93294	8.43119e-12
				Spef1	-2.25258	8.44579e-12
				Apobec1	2.90068	8.47109e-12
				Smim3	2.33742	8.47109e-12
				Npb	-1.86317	8.47109e-12
				Gm2545	-2.76767	8.48379e-12
				9430016H08Rik	1.73111	8.50271e-12
				Gsg1l	-4.73983	8.52657e-12
				Il4ra	2.02502	8.54902e-12
				Mybbp1a	1.52721	8.5557e-12
				Tnip2	1.28498	8.5557e-12
				Srfbp1	1.5857	8.6486e-12
				Usp3	1.72152	8.70859e-12
				5830428M24Rik	-4.78606	8.70859e-12
				Bid	2.32858	8.72234e-12
				2610015P09Rik	-2.74744	8.73557e-12
				Rsad2	6.09245	8.78965e-12
				1700001P01Rik	3.05455	8.78965e-12
				Aasdh	-1.75329	8.88453e-12
				Ppp1r18	2.0367	8.88453e-12
				Kiss1r	-1.92076	8.94582e-12
				Usp13	-2.89955	8.99664e-12
				Taf3	1.93849	9.00462e-12
				4930522O17Rik	-3.85963	9.03517e-12
				Ect2l	-4.02645	9.09464e-12
				Ccdc153	-3.95001	9.1306e-12
				8430426J06Rik	-4.5735	9.15837e-12
				Ceacam16	2.25984	9.15837e-12
				Tfb1m	-1.87101	9.17411e-12
				LOC102642957	-4.89355	9.17411e-12
				Rprd1a	-1.71707	9.20854e-12
				Slc6a15	-3.93037	9.26424e-12
				Junb	3.27231	9.3664e-12
				Adrb3	-4.07284	9.48719e-12
				LOC105244251	1.80289	9.53218e-12
				Cars2	-1.51448	9.55051e-12
				BC100530	8.35765	9.55512e-12
				Sin3b	1.98216	9.5834e-12
				Uxs1	2.11817	9.6698e-12
				Serpinb9e	5.95971	9.72491e-12
				A430027H14Rik	-3.78883	9.72491e-12
				Capza1	1.43739	9.80093e-12
				Mthfd2	2.34789	9.84379e-12
				Rhoj	2.06418	9.92869e-12
				Klhl6	3.85191	9.92869e-12
				Fbln5	-2.23859	9.92869e-12
				Ankrd65	-4.05737	9.92869e-12
				Dbr1	2.23915	9.98523e-12
				Celsr1	-2.53362	9.98523e-12
				Bdkrb1	3.17889	9.99167e-12
				Gmnc	-4.07762	1.01128e-11
				Spopl	-2.1329	1.0171e-11
				1500011B03Rik	2.88151	1.02279e-11
				Mkln1	1.92272	1.03836e-11
				Ccdc150	-2.62156	1.04923e-11
				Abi3bp	-3.19813	1.05874e-11
				S100g	-3.52732	1.06213e-11
				Tmem80	-1.85613	1.06274e-11
				Akap14	-4.8751	1.06671e-11
				Nup62	1.43306	1.07858e-11
				2610528J11Rik	-2.40603	1.09524e-11
				Ddx21	2.09755	1.10203e-11
				Mettl24	-2.66406	1.10203e-11
				1700024G13Rik	-5.71606	1.10203e-11
				Gm6377	3.69232	1.11034e-11
				Gm5767	4.66461	1.11034e-11
				Myo5c	-3.24172	1.11034e-11
				Noxa1	-5.09753	1.11692e-11
				Ank3	-3.90877	1.11775e-11
				Phf20	-1.57468	1.12903e-11
				Dennd6a	-1.77076	1.13383e-11
				2210011C24Rik	-3.73156	1.13928e-11
				Arih2	1.38047	1.14171e-11
				Pdcd6	1.55724	1.14171e-11
				Klhl17	-1.4815	1.14239e-11
				Ttc21b	-2.62579	1.14239e-11
				Tgfbr2	1.45495	1.15654e-11
				Utp23	1.82681	1.15689e-11
				Nsun2	1.5842	1.16006e-11
				Upk3a	-5.59116	1.16006e-11
				Cyp1b1	3.62525	1.1601e-11
				Papd4	1.71988	1.1601e-11
				Pdzd2	-2.5114	1.17813e-11
				Npr1	-1.80733	1.18067e-11
				Chil1	-2.18533	1.18896e-11
				Ociad2	-3.65132	1.18977e-11
				Lrrc25	3.58199	1.19413e-11
				Fcgr2b	3.74802	1.19959e-11
				Snhg5	1.88664	1.21291e-11
				Gm32092	-3.28489	1.21303e-11
				Ltk	-3.36608	1.21914e-11
				Gm11627	-3.11079	1.22136e-11
				Gcsam	-2.91091	1.23367e-11
				Hdhd3	-2.65867	1.23367e-11
				Mkks	-2.94106	1.23916e-11
				C87436	-1.64839	1.24333e-11
				Stk38l	1.69832	1.25122e-11
				Etl4	-2.37565	1.25695e-11
				Pqlc2	1.48392	1.2579e-11
				Akap5	-3.43041	1.25987e-11
				Prodh	-3.39695	1.25987e-11
				Ptpn3	-1.72134	1.25987e-11
				Adam18	-3.57517	1.25987e-11
				Hes2	-4.40673	1.26288e-11
				Odc1	1.77858	1.27243e-11
				Gm11974	2.79069	1.28724e-11
				Tacstd2	2.77336	1.28869e-11
				Apol9b	5.16193	1.30107e-11
				Tmigd3	-2.71484	1.30107e-11
				Fam71a	5.36415	1.32242e-11
				P2rx5	-1.88422	1.33074e-11
				Timm10	1.76934	1.33317e-11
				Ano1	-1.99066	1.33475e-11
				Gm10634	5.10597	1.33827e-11
				Magix	-5.25897	1.34012e-11
				Sfn	4.16357	1.34012e-11
				Ak7	-3.25426	1.35855e-11
				Aif1	2.92728	1.38137e-11
				Kcnmb4	-2.53838	1.38333e-11
				Gm38448	-2.74879	1.38333e-11
				Ppp1r21	1.78059	1.38333e-11
				Gm32575	-3.94563	1.38943e-11
				Gbp5	2.78214	1.39424e-11
				Slc25a42	-1.92566	1.39434e-11
				Emp1	1.62651	1.42088e-11
				Mgat3	-4.15982	1.42088e-11
				Dnah7b	-3.13717	1.42106e-11
				St3gal2	-1.52246	1.42823e-11
				Rad18	1.80064	1.43485e-11
				Gp49a	3.45325	1.44701e-11
				Pik3c2g	-5.38319	1.46243e-11
				Gda	2.89809	1.46564e-11
				Ldlrad1	-4.14207	1.47049e-11
				Ube2j2	1.82523	1.48192e-11
				Baiap3	-3.23927	1.48424e-11
				Pde1b	2.26619	1.4884e-11
				Aplp2	-1.35949	1.50015e-11
				Piezo2	-3.30977	1.50962e-11
				Hgfac	-1.9403	1.51122e-11
				Abca3	-2.83541	1.51365e-11
				Eps15	-1.42035	1.53915e-11
				Abca5	-2.40812	1.55055e-11
				1700029J07Rik	-3.15312	1.56605e-11
				Nasp	1.72923	1.57207e-11
				1110019D14Rik	-4.00591	1.57718e-11
				Dnah6	-2.89885	1.583e-11
				Gm32643	-4.03706	1.583e-11
				LOC102641028	-3.2382	1.58743e-11
				Dpysl2	-1.9052	1.59613e-11
				Cdc42bpg	-2.60271	1.60414e-11
				Gm10635	3.53376	1.60414e-11
				Purg	-1.622	1.60885e-11
				Fhdc1	-2.63638	1.6163e-11
				Bex4	-2.60272	1.62782e-11
				Sox18	-3.90774	1.65412e-11
				Dis3	1.79925	1.66007e-11
				Rab10os	2.03323	1.66007e-11
				Nifk	1.51367	1.66678e-11
				Gria1	-3.06869	1.66678e-11
				Iqca	-3.22136	1.66991e-11
				Casp4	2.69741	1.68838e-11
				Jak2	2.32745	1.69022e-11
				Inadl	-2.55112	1.69754e-11
				Wisp1	3.24298	1.69754e-11
				Serpina3c	3.96426	1.70203e-11
				Lrrc1	-1.93371	1.70203e-11
				Mapt	-2.8476	1.71132e-11
				5930403L14Rik	-1.87089	1.71413e-11
				Slc34a2	-4.75639	1.71771e-11
				Mast1	-2.32554	1.72276e-11
				Slc9a6	-1.46672	1.72276e-11
				Slc22a17	-2.06067	1.72465e-11
				Eif4ebp1	2.08908	1.73212e-11
				Stk33	-3.20472	1.73212e-11
				C030014I23Rik	-1.96194	1.73481e-11
				Slfn9	3.10638	1.73788e-11
				1700042O10Rik	5.22041	1.73814e-11
				AI256396	-4.14978	1.73814e-11
				Fam101a	-2.734	1.73814e-11
				9130002K18Rik	-1.99754	1.75145e-11
				Swt1	-1.4879	1.77494e-11
				Crocc	-2.61337	1.77954e-11
				Iigp1	3.27698	1.78393e-11
				Tmem167	1.85484	1.79357e-11
				Dpp8	-1.5252	1.79573e-11
				Gjb4	7.28532	1.80394e-11
				4930443O20Rik	-2.27171	1.80394e-11
				Mia	-3.53983	1.81087e-11
				Lsmem2	-2.29557	1.81172e-11
				Krba1	-1.52536	1.81778e-11
				Scn2a1	-3.33086	1.81778e-11
				Siah2	1.98319	1.81778e-11
				Zbtb40	-1.65652	1.82291e-11
				Nek11	-4.38718	1.82715e-11
				Ncl	1.64092	1.83133e-11
				Sh2d4b	2.9411	1.83249e-11
				Fam49b	1.98733	1.8359e-11
				Zfp317	-1.44833	1.83727e-11
				Zmynd10	-3.75435	1.84111e-11
				Entpd3	3.55385	1.85205e-11
				Eno4	-3.94645	1.85317e-11
				Daw1	-3.41232	1.85329e-11
				Slc13a4	-3.20748	1.86571e-11
				1700001C02Rik	-4.06396	1.87189e-11
				Gm11545	-3.45165	1.88115e-11
				Fam13a	-4.09437	1.88115e-11
				Ifitm6	5.31685	1.88115e-11
				Slc2a1	2.57215	1.88206e-11
				Pdgfd	-2.94199	1.88206e-11
				Spem1	3.91695	1.88967e-11
				9530091C08Rik	-3.97805	1.88967e-11
				Il27ra	-3.02327	1.88967e-11
				1700031F10Rik	2.76297	1.88967e-11
				Psmd12	1.8456	1.88967e-11
				Ptp4a1	1.32362	1.89532e-11
				Gm5608	3.68595	1.89755e-11
				Ankrd24	-1.84124	1.91455e-11
				2810403G07Rik	3.29073	1.91466e-11
				Snrpa1	1.36478	1.91466e-11
				Ddx54	1.5009	1.91466e-11
				Ran	1.55529	1.91466e-11
				2410006H16Rik	1.91358	1.91466e-11
				Cul4b	1.8646	1.92394e-11
				Gap43	-3.40708	1.92507e-11
				Epha1	-3.09745	1.94242e-11
				Dmxl2	2.52221	1.94242e-11
				Zfp866	-1.67998	1.94242e-11
				Zfp763	-2.16958	1.94242e-11
				Brix1	1.88418	1.94242e-11
				Epb4.1l4b	-2.09189	1.94323e-11
				Rnd1	3.22176	1.94785e-11
				D030063E12	-1.53815	1.96172e-11
				Tceal6	-2.25101	1.9716e-11
				Atg16l2	-1.9498	1.99221e-11
				AI426330	-2.04926	1.99451e-11
				Stag2	-1.19638	2.00463e-11
				Id4	-1.87113	2.02669e-11
				Cln8	1.54396	2.05084e-11
				Apol7d	3.07216	2.05108e-11
				Cd33	3.85537	2.05867e-11
				5031426D15Rik	-3.14665	2.06295e-11
				E030044B06Rik	-4.48409	2.06965e-11
				Psmd9	1.9153	2.06965e-11
				Oasl2	2.15769	2.0867e-11
				4930415F15Rik	3.19308	2.08963e-11
				Npw	-2.79052	2.10013e-11
				Bphl	-2.66286	2.11083e-11
				S100z	-3.579	2.11364e-11
				Ddias	2.78757	2.13662e-11
				D230018H15Rik	-3.1983	2.1417e-11
				Cdkn1a	4.21004	2.17735e-11
				Prss56	3.4894	2.18523e-11
				Kcnj14	-2.57172	2.18753e-11
				Gjb3	3.79733	2.18753e-11
				Kif6	-2.69992	2.19207e-11
				Gabra4	-4.15342	2.19349e-11
				AA543186	-3.17439	2.21179e-11
				Cmpk2	3.32764	2.21252e-11
				Trim12a	3.28158	2.23158e-11
				Kdelc2	-1.7513	2.26088e-11
				Rprm	-2.94509	2.27931e-11
				Dgkb	-3.89955	2.27931e-11
				Tmtc2	-2.63459	2.2951e-11
				D9Ertd115e	-3.13944	2.29644e-11
				Inmt	-3.27806	2.29644e-11
				H2-T10	2.21058	2.30035e-11
				Caps2	-3.86131	2.30451e-11
				Ch25h	4.6059	2.31207e-11
				Slc15a2	-3.17806	2.31897e-11
				Sh2b2	3.69824	2.32005e-11
				2810433D01Rik	-3.45085	2.32448e-11
				4932418E24Rik	-3.09723	2.33317e-11
				Tbxa2r	-3.64359	2.34107e-11
				Taf9	2.15462	2.34107e-11
				D1Ertd704e	-2.09043	2.34107e-11
				4931440P22Rik	2.06088	2.34546e-11
				Tfpi2	4.92322	2.36258e-11
				Crnde	-2.68888	2.36921e-11
				Nme9	-3.48286	2.36921e-11
				Otub2	-2.07798	2.36921e-11
				4732414G09Rik	-3.15639	2.37981e-11
				Zfp748	-2.83583	2.37981e-11
				Fmo5	-3.12132	2.42699e-11
				Tyw5	1.40486	2.43477e-11
				2810001A02Rik	2.18403	2.43588e-11
				Rassf8	1.94589	2.43758e-11
				AI853106	-3.36612	2.44111e-11
				Gtf2f1	1.51373	2.44282e-11
				Cmtm8	-2.682	2.44868e-11
				Nipa1	-1.92065	2.44868e-11
				Cyp2c44	-4.47987	2.44895e-11
				Ncbp2	-1.42411	2.45839e-11
				Sdr42e1	-2.03312	2.45942e-11
				Ctnnd2	-3.16564	2.46219e-11
				Eln	3.6174	2.46219e-11
				Osm	4.37553	2.46896e-11
				Slc37a3	-1.63071	2.48443e-11
				Rtp4	2.64747	2.48443e-11
				9530085L11Rik	-3.00653	2.48443e-11
				A530030E21Rik	-1.61306	2.50333e-11
				Prkag2	-1.89796	2.508e-11
				Cbx8	-2.8985	2.52334e-11
				Stab2	-3.33958	2.52513e-11
				Ifih1	2.24466	2.55717e-11
				Lrrn3	-2.99557	2.56355e-11
				Mmp8	5.61329	2.56446e-11
				Ezh1	-1.31032	2.57414e-11
				Elfn1	-3.18079	2.57873e-11
				Tmem116	-3.83083	2.57873e-11
				Tie1	-1.85837	2.58745e-11
				Slco4c1	-2.6261	2.59679e-11
				4930402H24Rik	-1.68911	2.62951e-11
				Slc16a11	-3.95177	2.63035e-11
				Kantr	-1.65338	2.6406e-11
				Cstf2	2.03543	2.6475e-11
				Prps2	-3.62957	2.65073e-11
				Ggcx	-2.43686	2.65294e-11
				Sirt5	-1.75237	2.65527e-11
				Sncaip	-1.87796	2.66213e-11
				Mus81	-2.04826	2.68421e-11
				LOC102642717	-1.76964	2.68421e-11
				Chtf8	-1.31249	2.68957e-11
				Ace2	-4.4766	2.68957e-11
				Ubr2	1.24032	2.69357e-11
				Tnip1	1.90665	2.6984e-11
				Efcab9	-3.10533	2.71643e-11
				Tmem64	-1.64227	2.73536e-11
				Crip3	-3.58179	2.74742e-11
				Lrsam1	-1.43625	2.75707e-11
				Clec4a1	2.4849	2.76509e-11
				Dram1	-1.8562	2.78522e-11
				Fgfr1	2.12683	2.80163e-11
				Ccdc154	-5.20122	2.81318e-11
				Acss2	-3.24354	2.84211e-11
				Hps5	-1.19387	2.84967e-11
				D16Ertd472e	2.88178	2.85346e-11
				Slc6a12	7.704	2.85346e-11
				Herc6	3.08411	2.8593e-11
				Nr2c1	-1.70659	2.86098e-11
				Ttc33	-1.3434	2.87034e-11
				Zfp40	-3.55673	2.8741e-11
				Islr2	4.53114	2.87969e-11
				Fmo1	-1.60873	2.88042e-11
				A630077J23Rik	-3.14549	2.88164e-11
				Itih4	-3.08017	2.89198e-11
				Actn1	1.70619	2.8944e-11
				Lrrc59	2.24852	2.89995e-11
				Slc7a6	2.51235	2.89995e-11
				4930555A03Rik	-3.76747	2.92291e-11
				Ptpn22	3.61244	2.92291e-11
				Colec10	-3.40328	2.93809e-11
				Shh	-3.7533	2.93828e-11
				Wfdc16	-6.51653	2.94804e-11
				A430046D13Rik	-3.8844	2.95388e-11
				Ube2j1	1.90981	2.96007e-11
				Dio2	5.39489	2.96744e-11
				Rgs16	5.03039	2.97711e-11
				Spta1	-3.839	2.98039e-11
				Gm36913	4.03455	3.01241e-11
				Gpr35	3.61671	3.04142e-11
				Lrrc43	-3.3196	3.04915e-11
				Cyp7b1	3.27611	3.04936e-11
				Itpkc	2.13117	3.05121e-11
				Fstl3	1.85933	3.05121e-11
				Dbn1	2.52645	3.05603e-11
				Micall2	3.18876	3.0888e-11
				Hal	4.2215	3.0888e-11
				Nfkbiz	2.38839	3.0888e-11
				1700021K19Rik	-2.0774	3.13069e-11
				Pon3	-2.13546	3.13069e-11
				C1qbp	1.4819	3.14445e-11
				Sspn	-2.45225	3.22966e-11
				Ptbp2	1.65495	3.22985e-11
				Spata2	1.34705	3.23071e-11
				Sh3tc2	-3.01479	3.23187e-11
				Ahctf1	1.29823	3.25309e-11
				Zan	-4.23143	3.26722e-11
				Ppm1l	-1.55781	3.27901e-11
				Ninj1	2.06634	3.28171e-11
				Ppan	1.62474	3.28171e-11
				Iqcf1	1.92675	3.28171e-11
				A330009N23Rik	-6.05832	3.28171e-11
				9530053A07Rik	-2.151	3.28933e-11
				Abcd2	-3.46128	3.33429e-11
				Stfa2l1	6.63538	3.33429e-11
				Pxmp2	-3.32408	3.33429e-11
				Eif3j1	1.90739	3.35535e-11
				Gm38426	-2.3722	3.35535e-11
				Gmcl1	-1.37751	3.35716e-11
				Rsl1d1	1.46994	3.36417e-11
				Tnf	4.46879	3.39506e-11
				Dleu2	-3.91944	3.4067e-11
				Efcab1	-2.57329	3.407e-11
				Cpn1	-3.64452	3.407e-11
				A630026N12Rik	-2.02056	3.4113e-11
				Sema4f	-2.58779	3.44963e-11
				Fbxo42	1.7567	3.44963e-11
				Nsun7	-2.44589	3.45145e-11
				Lace1	-2.53685	3.46104e-11
				Cfap46	-4.24984	3.46104e-11
				Prrc2b	-1.41375	3.47301e-11
				Prdx6	-1.17124	3.52193e-11
				Aim1l	-2.23932	3.52201e-11
				Sh3gl2	-2.83409	3.52201e-11
				Ttll4	2.35119	3.54923e-11
				Wdr12	1.57342	3.55414e-11
				Cpa1	-2.81247	3.5722e-11
				Plekhf2	2.3686	3.5722e-11
				Zfp652	-1.46571	3.59115e-11
				Zdhhc1	-2.09763	3.59974e-11
				Tnfsf14	2.94968	3.61072e-11
				Gm3716	-3.32885	3.61072e-11
				Tiprl	1.33516	3.61514e-11
				Plekha6	-3.41917	3.61649e-11
				Irx5	-1.72461	3.62333e-11
				Cfap44	-3.59243	3.66294e-11
				Alox5ap	3.11136	3.73389e-11
				Zfr2	-1.9077	3.78104e-11
				Il1r1	1.69489	3.8001e-11
				Dnah9	-2.51012	3.82409e-11
				Slc7a1	2.44284	3.8423e-11
				Rab3c	-4.10627	3.85075e-11
				Pde4dip	-1.28925	3.85771e-11
				Bcl3	2.53901	3.89102e-11
				Nfkbie	2.39111	3.89489e-11
				5430402P08Rik	-4.15719	3.89824e-11
				Lama3	-3.63697	3.90188e-11
				Etv2	3.11057	3.90188e-11
				Hist2h3c2	-4.0802	3.93625e-11
				Plch2	-2.44863	4.01025e-11
				Mx2	4.11104	4.01607e-11
				Ifit1	3.57251	4.02111e-11
				D030018L15Rik	-5.22703	4.02987e-11
				Awat1	5.19117	4.03151e-11
				Mavs	-1.45211	4.03151e-11
				Pla2g1b	-4.68979	4.06056e-11
				Stox1	-3.25189	4.08162e-11
				Wwp2	1.31135	4.09891e-11
				Dab2	2.1236	4.10694e-11
				BC039771	-2.80528	4.13633e-11
				Sos1	-1.991	4.14177e-11
				Yrdc	2.45045	4.16237e-11
				Gm10554	-2.11806	4.17005e-11
				Abcg3	-3.41684	4.18425e-11
				Slc11a1	3.21745	4.20818e-11
				Igflr1	-1.71345	4.21071e-11
				Memo1	1.47486	4.22123e-11
				Nit1	-1.22951	4.22529e-11
				4931403G20Rik	-3.33936	4.22529e-11
				Psmc6	1.41368	4.22529e-11
				Cped1	-1.82557	4.22529e-11
				Ttll6	-2.61765	4.22949e-11
				Mob4	1.63088	4.23878e-11
				Ndnf	-3.16088	4.246e-11
				Armcx5	1.71971	4.26912e-11
				Zbtb44	-2.11164	4.27128e-11
				Met	-1.88174	4.27383e-11
				Dnah5	-4.53313	4.34571e-11
				Arc	4.60692	4.34571e-11
				1810010D01Rik	-2.51002	4.34571e-11
				Gm35716	3.47404	4.36128e-11
				Phactr2	-1.65172	4.37451e-11
				Cyp39a1	-2.82887	4.38833e-11
				Inhba	3.35012	4.38833e-11
				Ly96	-1.82643	4.40219e-11
				Slc20a1	1.45756	4.42804e-11
				Ier5	1.95754	4.43045e-11
				Cxcl16	1.56687	4.43564e-11
				Arxes2	-2.78794	4.45057e-11
				Tubd1	-2.93842	4.46606e-11
				Zfp114	-2.03383	4.47745e-11
				C77370	-1.91248	4.50219e-11
				Gm7420	-2.21182	4.50589e-11
				Ddx58	1.71624	4.51307e-11
				Ybx3	1.3489	4.53771e-11
				Bcl10	1.51529	4.54987e-11
				BC026513	-4.0038	4.57774e-11
				Gprasp1	-2.40932	4.57991e-11
				Pvrl3	-2.0582	4.60575e-11
				Shroom1	-2.00799	4.63845e-11
				2610027K06Rik	-2.91735	4.65314e-11
				Capsl	-2.36931	4.66048e-11
				Gbp9	2.33431	4.6666e-11
				Itpr1	-1.61601	4.6666e-11
				Npr2	-1.50357	4.66731e-11
				Ms4a6c	4.42258	4.67345e-11
				Slc39a1	1.30673	4.6768e-11
				Cadm1	-2.04135	4.73077e-11
				Fto	-1.56542	4.73077e-11
				Mesp2	-2.42653	4.75024e-11
				Mob3b	-2.39031	4.75024e-11
				Mapk6	2.29553	4.77229e-11
				Gramd1b	1.98879	4.77413e-11
				5330429C05Rik	2.70781	4.78303e-11
				Rsph14	-3.46431	4.7835e-11
				Ccdc67	-2.55782	4.79092e-11
				Pdlim7	2.24809	4.79967e-11
				Ushbp1	-3.29929	4.81471e-11
				Adcy7	-1.76899	4.86071e-11
				Myo6	-1.69444	4.88955e-11
				Zbtb24	-1.59182	4.89657e-11
				Daxx	2.2209	4.89657e-11
				Pigh	-2.0425	4.92774e-11
				Soat2	3.93123	4.93136e-11
				A530099J19Rik	-4.43515	4.93571e-11
				Morn5	-3.71348	4.95371e-11
				Bhlhe40	2.60331	5.05268e-11
				Gbp6	2.66092	5.05599e-11
				S1pr5	-3.9096	5.05599e-11
				LOC102638002	-1.65028	5.07131e-11
				Dph3	1.54976	5.07306e-11
				Tifa	2.47462	5.08367e-11
				Lrrc36	-3.00939	5.09251e-11
				Pm20d1	-3.01587	5.09344e-11
				Wdr63	-3.53387	5.09344e-11
				Nr3c2	-2.45825	5.12878e-11
				Psat1	2.00704	5.1463e-11
				Fcf1	1.41281	5.16036e-11
				Prom2	-3.57058	5.16674e-11
				Slc44a4	-2.23264	5.16674e-11
				Fgf2	3.26358	5.18816e-11
				A230092J17Rik	-1.99334	5.21536e-11
				Pxmp4	-2.21677	5.21763e-11
				Atp11a	-2.38617	5.21763e-11
				Npy1r	-3.08884	5.2203e-11
				Iglon5	3.13213	5.26346e-11
				Hbegf	2.40623	5.28103e-11
				Cd300e	-2.69004	5.31122e-11
				Adamts10	-1.92866	5.32822e-11
				Gm38832	2.57616	5.36288e-11
				Synpo	-1.94066	5.38639e-11
				Snhg10	1.66858	5.40113e-11
				Dnaic1	-2.80734	5.41164e-11
				Cdc34	1.13341	5.41402e-11
				Polr1d	1.0676	5.41402e-11
				Cirh1a	1.75941	5.41402e-11
				Baiap2l1	-2.89798	5.42451e-11
				S100a4	2.53151	5.43136e-11
				Gm10369	2.42239	5.43523e-11
				Socs1	2.3147	5.47e-11
				Ifi205	4.50427	5.48031e-11
				Dynll2	-1.79453	5.49116e-11
				Slc35f6	1.79579	5.51283e-11
				Prdx5	1.67617	5.52738e-11
				Csf1	2.6016	5.54745e-11
				Get4	1.63692	5.54987e-11
				Ints12	1.64229	5.56733e-11
				Cdkl5	-2.49947	5.59254e-11
				Ltb4r1	2.71835	5.6044e-11
				Ampd3	2.43612	5.62975e-11
				Chrdl1	-4.45618	5.63801e-11
				Gm32133	6.08149	5.6447e-11
				Ralgps2	-2.03336	5.68281e-11
				Acrbp	-2.48411	5.71311e-11
				Proser3	-1.58513	5.71311e-11
				Wfdc2	-1.5389	5.71311e-11
				Ciita	-3.48256	5.71311e-11
				Styxl1	-2.83862	5.71311e-11
				Fosb	4.78131	5.71311e-11
				Zfp882	-3.82697	5.71311e-11
				Nnt	-1.71645	5.72637e-11
				Cdh16	-5.25296	5.74521e-11
				Nmt1	1.38824	5.75268e-11
				Klre1	-4.71778	5.76296e-11
				F2	-3.6297	5.78063e-11
				Rfx3	-1.67847	5.80403e-11
				BC117090	8.09814	5.81785e-11
				Gm6034	3.5165	5.82049e-11
				Maml1	1.36121	5.82085e-11
				Mphosph6	1.2548	5.84929e-11
				Dcxr	-2.24934	5.85543e-11
				Tmed8	-1.23225	5.87655e-11
				Tmem251	1.97967	5.9589e-11
				Dnah11	-3.24304	5.9589e-11
				Spsb3	1.26919	5.96072e-11
				1200007C13Rik	5.09797	5.98182e-11
				Synrg	-2.2588	6.00209e-11
				Btbd7	1.4521	6.04659e-11
				Nxpe3	-2.11443	6.04951e-11
				Ppp1r15a	2.11876	6.07764e-11
				Plk3	2.26965	6.07764e-11
				4930417O13Rik	-3.3528	6.07764e-11
				H2-Q8	1.93349	6.0878e-11
				H2-Q2	1.82707	6.0878e-11
				Fam212b	-2.06533	6.10741e-11
				Gm34752	-1.46493	6.10741e-11
				Gm10914	-2.48456	6.13444e-11
				Kdm1b	-1.23787	6.15537e-11
				Clic1	1.29777	6.20747e-11
				Smox	1.79423	6.28349e-11
				Plxnb1	-1.83923	6.28349e-11
				Slco1c1	3.18532	6.34856e-11
				Snx10	2.39868	6.36532e-11
				Bach2	-1.99245	6.36532e-11
				Tmem192	1.65186	6.36532e-11
				Cuzd1	2.68472	6.41964e-11
				Plat	3.45053	6.42785e-11
				Blm	2.08336	6.42993e-11
				Taf5l	1.44539	6.52412e-11
				Psma2	1.34364	6.52575e-11
				Agpat5	2.06239	6.57413e-11
				4833418N02Rik	2.26787	6.63169e-11
				Lpxn	2.7793	6.68454e-11
				Erc2	-1.96518	6.69026e-11
				H2-T23	1.66627	6.69732e-11
				Gucy1a2	-2.55701	6.74497e-11
				Ankrd27	-1.64407	6.74497e-11
				Inip	1.74006	6.80572e-11
				Mrto4	1.51316	6.82918e-11
				Sap30	2.21834	6.82918e-11
				Gm5914	2.3523	6.85928e-11
				Msr1	6.1944	6.86315e-11
				Gm3853	-3.27574	6.86522e-11
				9230112J17Rik	-1.69173	6.86522e-11
				Tfrc	-1.88342	6.86522e-11
				Gm6209	1.64741	6.86522e-11
				Lifr	-1.96193	6.90939e-11
				Tsnaxip1	-5.26112	6.91832e-11
				Shisa9	3.75831	6.93428e-11
				Sat1	1.74881	6.94502e-11
				BC049987	4.94098	6.95981e-11
				Nkx2-1	-2.33361	6.9726e-11
				Fras1	-3.46251	7.0004e-11
				Setdb2	2.28026	7.0004e-11
				Gm36542	-2.88208	7.00115e-11
				Gcgr	-2.27828	7.00567e-11
				Robo2	-2.85906	7.04343e-11
				B430316J06Rik	-1.94941	7.07209e-11
				Exd1	-1.5973	7.07209e-11
				Eif5	1.43921	7.16995e-11
				Serpina3i	4.09743	7.17447e-11
				Pdss1	1.62911	7.17447e-11
				Fcer1g	3.00038	7.18156e-11
				Aamdc	-1.32325	7.18412e-11
				Ackr1	6.90719	7.26903e-11
				Morn3	-3.08957	7.26903e-11
				1700001J03Rik	3.06432	7.30945e-11
				Ifi27l2b	4.48349	7.30945e-11
				Clic5	-1.73321	7.30945e-11
				Mzt1	1.56496	7.34394e-11
				Kcnt1	5.05473	7.35636e-11
				Chmp4b	1.22935	7.36066e-11
				Psmb10	1.31855	7.40531e-11
				Med10	1.40675	7.40531e-11
				Exoc3	-1.42044	7.41517e-11
				Fam183b	-2.93509	7.43467e-11
				Proscos	2.06007	7.44742e-11
				S100a14	2.98627	7.44742e-11
				Cxcl9	7.88507	7.44747e-11
				Nbea	-1.33709	7.47436e-11
				Plac8	3.58125	7.50736e-11
				Klhl23	-2.02618	7.62208e-11
				Nipal1	1.98804	7.63216e-11
				Nrg1	2.3238	7.71962e-11
				Tnfsfm13	-1.39398	7.74037e-11
				Zdhhc14	-1.65723	7.74771e-11
				Usp19	1.77303	7.7527e-11
				Urah	-1.87885	7.75714e-11
				Zbtb4	-1.49273	7.75714e-11
				Rbpjl	-4.29477	7.81043e-11
				Plekhh1	-1.62297	7.81043e-11
				Ccnf	2.15717	7.81043e-11
				Pls1	-1.46744	7.82474e-11
				Cldn4	5.44691	7.82474e-11
				Slc24a4	-2.33549	7.82474e-11
				Gsg1	2.29257	7.82474e-11
				Ces1e	-7.25054	7.8457e-11
				Csnk2a2	1.45498	7.8457e-11
				Prr18	-3.43206	7.85641e-11
				Muc2	2.66448	7.85641e-11
				Cxadr	-2.06914	7.85641e-11
				BB283564	-2.19642	7.87277e-11
				Klhl13	-1.95929	7.8759e-11
				Kcnk13	2.38816	7.87899e-11
				Clstn2	-1.97024	7.87899e-11
				Gm38636	-4.28318	7.87902e-11
				Rpl37	2.13971	7.87902e-11
				Gm7265	-2.58428	7.89067e-11
				Rrp12	1.95513	7.97833e-11
				Kcmf1	1.63622	7.99352e-11
				Ttc21a	-2.79667	8.00523e-11
				Ptx3	6.19441	8.02065e-11
				Plekho2	1.84499	8.02065e-11
				Serpinb9f	5.24458	8.02389e-11
				Ccdc113	-2.62653	8.0308e-11
				Snx32	-2.99048	8.06542e-11
				Stfa2	6.75906	8.08619e-11
				D630029K05Rik	-3.45223	8.12161e-11
				Lrg1	2.70859	8.12161e-11
				LOC102637942	-1.42906	8.12161e-11
				Adam8	3.93923	8.12161e-11
				Cpne2	1.56125	8.13459e-11
				Gne	-1.26469	8.15186e-11
				Cish	1.96824	8.1925e-11
				Colgalt2	-4.44997	8.1951e-11
				Efcab10	-3.43075	8.19676e-11
				Rbp4	-2.59337	8.19933e-11
				Colq	-5.84575	8.32773e-11
				Mmp10	4.84018	8.34555e-11
				C920025E04Rik	1.97511	8.38401e-11
				Ak8	-1.73009	8.42703e-11
				Dguok	-2.15552	8.42869e-11
				Nphs2	-2.50202	8.48799e-11
				Faah	-2.616	8.48853e-11
				Irak3	1.42863	8.52745e-11
				Trmt12	-1.80536	8.59232e-11
				Kitl	-1.7916	8.59232e-11
				Msrb1	1.63724	8.62695e-11
				Riiad1	-2.21493	8.62695e-11
				Epha8	-4.47186	8.62695e-11
				Gm26671	-3.28504	8.65316e-11
				Fn3k	-2.91379	8.69564e-11
				Kif1bp	-1.41805	8.69564e-11
				Wbp4	1.54213	8.83575e-11
				Cep57l1	-1.6201	8.89802e-11
				Eif6	1.81775	8.9051e-11
				Tnfrsf19	-1.79687	8.93538e-11
				Hpn	-1.87259	8.95419e-11
				Rpf2	1.76228	9.05427e-11
				Tnfrsf25	-2.57399	9.05638e-11
				Cd207	-3.50523	9.10307e-11
				Rhbdl1	-2.38709	9.11955e-11
				Oprl1	2.92718	9.12566e-11
				Tbx1	-2.3593	9.15038e-11
				Adgrb1	3.68822	9.20807e-11
				Dapp1	2.25884	9.30747e-11
				Ackr3	2.83611	9.37607e-11
				Fcgr4	2.99832	9.38087e-11
				Rtfdc1	1.44805	9.39561e-11
				Usp20	-1.32786	9.44694e-11
				C130040N14Rik	3.94104	9.44881e-11
				Dnajc28	-3.99615	9.44881e-11
				Kif16b	-1.88518	9.45309e-11
				Smyd2	1.09332	9.46133e-11
				Zfp663	-1.61595	9.46554e-11
				Exosc7	-1.12555	9.55153e-11
				Cyp2f2	-7.32681	9.55153e-11
				H2-L	1.73489	9.60787e-11
				Rftn2	-2.54761	9.62299e-11
				2310009A05Rik	-1.6129	9.63023e-11
				2010300F17Rik	3.93927	9.63023e-11
				Gm10101	-1.6907	9.72184e-11
				Cenpv	-1.31667	9.79207e-11
				Ovca2	-1.31689	9.85439e-11
				Arpc5	1.04849	9.8581e-11
				A030001D20Rik	-2.13434	9.91047e-11
				Tmc4	-1.58435	9.91252e-11
				B930036N10Rik	3.41656	9.91252e-11
				Tstd1	-1.59038	9.91252e-11
				Naa15	1.5181	9.92719e-11
				4930570G05Rik	4.21537	9.92719e-11
				Fmo3	-5.37272	9.92719e-11
				Rab7	1.38787	9.93529e-11
				Slc7a11	5.03904	9.97575e-11
				Ifitm7	2.19847	9.97575e-11
				Ubp1	1.34942	9.99817e-11
				Tmem194b	-2.72149	1.00233e-10
				Kifc2	-3.2405	1.00338e-10
				Gsap	-1.76957	1.00727e-10
				Spink2	3.70949	1.01203e-10
				Stmnd1	-3.4353	1.01452e-10
				Timm8a1	1.73378	1.01836e-10
				Zfp661	-1.74535	1.02105e-10
				Adm	4.04913	1.02341e-10
				Faf2	1.24	1.02755e-10
				Unc13b	-1.60192	1.03159e-10
				Helz	-2.14699	1.03202e-10
				Paqr6	-2.28163	1.03393e-10
				Slmo2	1.13273	1.03414e-10
				Akr1c14	-3.25691	1.03834e-10
				Rin1	2.80108	1.03886e-10
				Ncf4	3.09632	1.03886e-10
				Grb14	-1.92322	1.04473e-10
				Zc2hc1c	-2.32239	1.04935e-10
				Cdhr3	-3.34983	1.04935e-10
				Hspa9	1.5114	1.05221e-10
				Aldh1a1	-1.95316	1.0548e-10
				Zfp583	-3.62787	1.05627e-10
				Ntn5	-2.39555	1.05627e-10
				Rbm17	1.05955	1.05728e-10
				Cfap221	-2.48088	1.05728e-10
				Fat4	-1.71789	1.05772e-10
				Adi1	-1.29525	1.06951e-10
				Ccdc141	-2.65659	1.06971e-10
				Gm5483	6.50879	1.07286e-10
				Lrrk2	-2.83408	1.07338e-10
				Aatf	1.28679	1.07338e-10
				Tbc1d32	-1.51743	1.0775e-10
				Tiam2	1.94099	1.0775e-10
				Fgf11	-2.69685	1.07807e-10
				2310039H08Rik	1.24375	1.07822e-10
				Ypel5	2.21454	1.07896e-10
				Plaur	2.78861	1.08428e-10
				Ctnnbip1	1.33903	1.09566e-10
				Dlgap2	1.86348	1.10169e-10
				H2-K2	1.7474	1.10251e-10
				Mdm2	1.18426	1.10569e-10
				2610201A13Rik	2.15021	1.10757e-10
				Gm12680	-4.57341	1.11175e-10
				Gm2016	2.03224	1.11193e-10
				Muc20	-2.06027	1.11492e-10
				Shf	-1.44887	1.11634e-10
				Ppp1r1c	3.04209	1.11634e-10
				Serpinb9g	5.52964	1.11662e-10
				Phox2a	5.89379	1.12185e-10
				Ankrd55	3.93324	1.12301e-10
				Arhgef38	-6.08222	1.12529e-10
				Relb	2.32892	1.13203e-10
				Tmod4	-2.701	1.13203e-10
				Trip13	1.95748	1.13352e-10
				Gpatch4	1.34482	1.13878e-10
				Map3k12	-1.95785	1.14121e-10
				Lgals3	2.12226	1.14121e-10
				D7Wsu130e	-2.70075	1.14121e-10
				Mr1	-2.58592	1.14619e-10
				Aldh4a1	-2.03656	1.15082e-10
				Stk19	1.43394	1.15438e-10
				Phlda1	1.55192	1.15707e-10
				Scgb1c1	-4.83604	1.1592e-10
				Fyttd1	1.25423	1.16071e-10
				C030009J22Rik	-2.43399	1.16619e-10
				Nip7	1.61444	1.17264e-10
				Ugdh	1.32367	1.17657e-10
				Ccl12	4.39966	1.18482e-10
				Sema4g	-3.40063	1.19111e-10
				H2-Q7	1.79462	1.1956e-10
				Sult2b1	-2.4122	1.19917e-10
				Spats2l	1.43684	1.19961e-10
				Fam174b	-1.80099	1.2038e-10
				F10	2.53167	1.2038e-10
				Efhc1	-3.16875	1.20704e-10
				Rap2c	1.21685	1.2195e-10
				Gas2l3	2.90356	1.22667e-10
				Sirt4	-1.60399	1.23031e-10
				Srp54a	-1.50702	1.23068e-10
				Slfn8	2.85818	1.23857e-10
				Gm12472	2.86837	1.23948e-10
				Trip6	1.33063	1.24356e-10
				Dtx4	2.64091	1.25241e-10
				H2-Eb1	-2.05756	1.26162e-10
				Pex26	-1.60324	1.26271e-10
				Gm4787	-2.34257	1.27128e-10
				Grwd1	1.90067	1.27244e-10
				Il20rb	2.63161	1.27379e-10
				Gfod2	-1.83795	1.27526e-10
				Gadd45g	2.71042	1.27677e-10
				Ada	2.2646	1.28281e-10
				0610011F06Rik	-1.79474	1.28479e-10
				Pgm5	-2.29972	1.28479e-10
				Lgmn	1.91751	1.28513e-10
				Klk13	-4.18626	1.2864e-10
				Tcte2	-2.41889	1.30697e-10
				Gm11783	-3.01486	1.3167e-10
				Rlf	1.48908	1.31759e-10
				1700084E18Rik	2.21415	1.32164e-10
				Tfcp2l1	-2.48197	1.32485e-10
				Bri3bp	1.72587	1.32485e-10
				Fam111a	-1.74953	1.3253e-10
				P2rx2	-2.32837	1.32968e-10
				Wscd2	-1.88797	1.33642e-10
				4831440E17Rik	-1.93611	1.33664e-10
				Agtpbp1	-1.46985	1.33895e-10
				Gm30146	-1.75669	1.33895e-10
				Ankrd28	1.86785	1.33905e-10
				Chd3	-1.47045	1.34149e-10
				Ctsl	1.85541	1.3423e-10
				Asxl1	-1.15427	1.3423e-10
				Snn	-2.04129	1.3423e-10
				Cacna2d4	-3.82196	1.35089e-10
				Rrm2b	-1.97148	1.35199e-10
				Dmtn	-1.7186	1.3523e-10
				Gm16489	-3.36552	1.35848e-10
				Acad10	-2.59443	1.35946e-10
				Cand1	1.01075	1.36074e-10
				1810014B01Rik	-3.11979	1.36074e-10
				Ccne1	2.31183	1.36118e-10
				Cd74	-1.53252	1.36322e-10
				Hist4h4	-1.2262	1.36322e-10
				Krt17	4.73306	1.36837e-10
				Spag16	-3.90432	1.37054e-10
				Dusp22	1.5219	1.37062e-10
				Smn1	1.60619	1.37974e-10
				Nek5	-2.03255	1.37974e-10
				Psmb8	2.00022	1.38214e-10
				Marcks	1.49395	1.38522e-10
				Arsk	-1.61244	1.38874e-10
				Itgax	-1.96811	1.38959e-10
				Cbwd1	1.31919	1.39123e-10
				Tpd52	1.78679	1.40441e-10
				Gm4956	-4.43224	1.40441e-10
				Cfap97	-1.10758	1.40441e-10
				Acer3	1.53806	1.40521e-10
				Plcl2	1.92661	1.40521e-10
				Marveld1	-1.40945	1.40521e-10
				Golt1b	1.22164	1.40521e-10
				Pi15	3.54454	1.40626e-10
				Arf2	1.176	1.41086e-10
				Ccpg1os	-3.23212	1.41197e-10
				Plxna3	-2.89389	1.41197e-10
				H2-D1	1.74221	1.41197e-10
				Wfdc21	4.50603	1.42275e-10
				Vwa3a	-2.49687	1.4232e-10
				Rarg	-1.36075	1.42606e-10
				Slc16a12	-1.77261	1.42606e-10
				Gnl2	1.25272	1.42606e-10
				Stk36	-1.90027	1.42652e-10
				Cfap43	-2.56847	1.4311e-10
				4931414P19Rik	-2.09263	1.43225e-10
				Six5	-1.43178	1.43518e-10
				Nhp2l1	1.67218	1.44288e-10
				Eno1b	1.54377	1.45008e-10
				Dtx3l	1.56503	1.45118e-10
				Kndc1	-2.55209	1.45168e-10
				Gba2	-1.32512	1.45168e-10
				Tlr7	2.81392	1.45168e-10
				A230107N01Rik	-2.78948	1.45168e-10
				Tmem209	1.97033	1.45205e-10
				Rapgef4	-3.33401	1.45873e-10
				Gucy1a3	-1.75179	1.45873e-10
				Cntrob	-1.62581	1.45873e-10
				Lag3	2.5784	1.47103e-10
				Srm	1.82021	1.47199e-10
				Slc27a3	-1.97401	1.48225e-10
				Timm17a	1.44981	1.48688e-10
				Ccrl2	1.91723	1.48713e-10
				Mecom	-4.47312	1.48737e-10
				Gm5431	2.50252	1.49183e-10
				Lsm12	1.20682	1.4936e-10
				Ar	-2.09143	1.50172e-10
				Dusp28	1.46669	1.50248e-10
				Syt5	-2.40379	1.50248e-10
				Arfgap1	1.35873	1.50293e-10
				Map2k6	-1.46433	1.51847e-10
				8030494B02Rik	1.13344	1.52096e-10
				Ubqln1	1.57279	1.53908e-10
				Acyp1	-2.38442	1.53908e-10
				Gm14207	-2.76226	1.54482e-10
				Zfp326	1.11695	1.54666e-10
				Alas1	-1.75931	1.55045e-10
				Ptprf	-1.7887	1.56527e-10
				Eif5a	1.12578	1.56527e-10
				Zmat1	-3.29511	1.57094e-10
				Spryd7	1.7497	1.57584e-10
				Rap2b	2.55047	1.57856e-10
				Lrrc74b	-4.08853	1.58091e-10
				Mpeg1	1.59777	1.58091e-10
				Ptgds	-3.04432	1.58285e-10
				Irg1	7.85405	1.58574e-10
				Tomm40	1.28869	1.58884e-10
				Cd47	1.51556	1.59138e-10
				Zmynd19	1.57539	1.59173e-10
				Atp2c1	-1.31225	1.59551e-10
				Ltbp4	-2.77177	1.59612e-10
				Slc15a3	2.91371	1.59612e-10
				Plek	1.92065	1.59688e-10
				Bend7	-2.24468	1.59688e-10
				Wscd1	-2.50154	1.61106e-10
				Mrpl52	1.11571	1.61719e-10
				Ttc25	-3.46325	1.61861e-10
				Id2	1.28154	1.6226e-10
				Cyp4v3	-1.76266	1.62561e-10
				Lilra5	-4.31957	1.64198e-10
				Gstt3	-2.5958	1.65186e-10
				Cx3cl1	-2.20305	1.65562e-10
				Dtnbp1	1.45257	1.65658e-10
				Asprv1	4.52142	1.65755e-10
				Igtp	2.06663	1.66191e-10
				Arf6	1.33624	1.67104e-10
				Hif1a	2.14381	1.67447e-10
				Tekt4	-2.74043	1.67447e-10
				Nif3l1	1.96445	1.67548e-10
				Alad	-1.53128	1.67548e-10
				Oprm1	-1.67887	1.68591e-10
				Wac	2.32838	1.68646e-10
				Has2os	2.61881	1.68788e-10
				Cecr6	-3.19995	1.68788e-10
				Stk17b	2.36593	1.68996e-10
				Fstl1	1.63292	1.68996e-10
				Gm15800	-1.30526	1.69407e-10
				Snhg1	1.99711	1.69407e-10
				Fbxo15	2.25701	1.69407e-10
				5330413P13Rik	-3.6129	1.69407e-10
				Lman2	1.42189	1.70515e-10
				Armc4	-2.78147	1.71031e-10
				Ttll9	-5.01804	1.71522e-10
				Casd1	-1.75675	1.72152e-10
				Nuak2	1.36426	1.72752e-10
				Krt16	3.20057	1.73058e-10
				1500009C09Rik	4.64786	1.73391e-10
				A930026B05Rik	-1.49488	1.73596e-10
				Dnajc11	-1.79363	1.73596e-10
				Pdgfrl	2.11137	1.74068e-10
				Clic6	-2.08967	1.7492e-10
				Morn1	-2.1753	1.7492e-10
				Zfp128	-2.04484	1.75e-10
				Tnfsf9	2.10404	1.75049e-10
				Rtn1	-1.45031	1.7664e-10
				Smim6	-2.63003	1.77483e-10
				B930025P03Rik	-3.435	1.77483e-10
				Tlr2	2.48989	1.78255e-10
				Sptbn1	-1.52944	1.7972e-10
				Ntmt1	1.38728	1.7972e-10
				Stat2	1.52674	1.79772e-10
				Chit1	5.63511	1.80934e-10
				Zdhhc17	-1.3543	1.81365e-10
				Tmem37	2.26152	1.81365e-10
				Psmb3	1.19383	1.81642e-10
				Pifo	-2.94522	1.82042e-10
				Sptbn2	-2.04958	1.82254e-10
				Gar1	1.49739	1.82254e-10
				Gdf15	2.66638	1.82434e-10
				Col4a3	-2.42106	1.83154e-10
				C79468	-1.45869	1.8341e-10
				Ube2k	1.20411	1.84754e-10
				1700013F07Rik	-2.58132	1.85038e-10
				Nup155	2.3323	1.85827e-10
				Tdg	1.68319	1.86e-10
				Bche	-2.01648	1.86776e-10
				Dapk2	-1.75566	1.86878e-10
				Adamtsl5	-1.98475	1.87068e-10
				Plscr4	-2.07755	1.87068e-10
				Cttnbp2nl	1.57603	1.87431e-10
				Klk8	-2.44058	1.87436e-10
				Hdac11	-4.12965	1.88006e-10
				Ctla2a	1.50556	1.88188e-10
				Gm10700	-2.04284	1.88363e-10
				Wars2	-1.57059	1.88363e-10
				Nop58	2.10047	1.89141e-10
				Cant1	1.89886	1.89478e-10
				Lrrc51	-3.23945	1.90076e-10
				Ddx28	1.64444	1.9073e-10
				Acot1	-2.7958	1.92198e-10
				Rtn4rl1	-1.29846	1.92198e-10
				Sec14l2	-1.93489	1.92415e-10
				Gm38499	-4.1333	1.93119e-10
				Mettl8	-1.46429	1.9356e-10
				Antxr1	-1.87526	1.94609e-10
				Cul3	1.34438	1.95837e-10
				Tmem139	-2.67065	1.9617e-10
				Tmem212	-2.42976	1.97327e-10
				Ctdp1	1.78491	1.97338e-10
				LOC105245970	3.99947	1.98369e-10
				Gnl3	2.44437	1.98478e-10
				Hkdc1	-3.11921	1.98478e-10
				Art4	-4.21918	1.98726e-10
				Tceal3	-2.20669	1.98889e-10
				Zbtb7b	1.5076	1.99273e-10
				Trmt61a	1.97343	1.99273e-10
				Sema6b	2.98421	2.00413e-10
				Eno1	1.5334	2.00606e-10
				Olfr920	2.46614	2.00736e-10
				Tmem247	4.76088	2.01682e-10
				Dnhd1	-1.33008	2.02402e-10
				Mccc2	-1.788	2.04262e-10
				Cngb3	5.0376	2.04374e-10
				Veph1	-3.48574	2.06138e-10
				Picalm	1.24343	2.06408e-10
				Gm536	5.32213	2.07216e-10
				Tpm3	1.07425	2.07845e-10
				AI415730	-1.68084	2.08292e-10
				Gde1	-1.13313	2.094e-10
				H2-DMb1	-1.84964	2.10052e-10
				Rnf213	1.39968	2.11278e-10
				H13	1.23204	2.11955e-10
				Fahd2a	-1.27219	2.12858e-10
				Prok2	4.88231	2.13093e-10
				Il17rd	-1.70236	2.13205e-10
				Psma4	1.06939	2.13355e-10
				Ccdc59	1.20676	2.13455e-10
				D130051D11Rik	-2.01229	2.13802e-10
				4930453N24Rik	1.1299	2.14836e-10
				Ppp2r2b	-2.29737	2.16129e-10
				Lrrc34	-2.43715	2.16169e-10
				Slc25a23	-3.71672	2.16215e-10
				Fancg	-1.74218	2.16215e-10
				3930401B19Rik	2.61231	2.16215e-10
				Tbrg4	1.85136	2.16219e-10
				Cyp2j9	-1.49074	2.167e-10
				Epb4.1l3	-2.49476	2.17051e-10
				Raet1b	3.49102	2.18106e-10
				Ube2n	1.05037	2.18767e-10
				Muc1	-2.2916	2.18797e-10
				Zc2hc1a	1.25567	2.18976e-10
				Mafk	1.61437	2.20768e-10
				AI451458	-1.81522	2.20768e-10
				Rsph4a	-3.26598	2.20792e-10
				Gbp3	2.98032	2.20912e-10
				Cd59b	-2.88357	2.2172e-10
				Tacr2	-1.66294	2.21848e-10
				Phka1	-1.43357	2.23195e-10
				Zscan26	-1.29629	2.23503e-10
				Padi3	-2.80445	2.23783e-10
				1700094D03Rik	-1.62487	2.2416e-10
				Il6	10.1844	2.26124e-10
				Ccdc13	-2.77085	2.28451e-10
				Mansc1	-1.41661	2.28753e-10
				Fam47e	-2.65614	2.29264e-10
				Vps37b	1.28057	2.29264e-10
				Plekha4	2.11461	2.29324e-10
				AI849538	1.77299	2.29497e-10
				Tmtc4	-2.14619	2.29737e-10
				Lrch1	-1.60066	2.29737e-10
				A730020M07Rik	4.00645	2.29793e-10
				H3f3b	1.33242	2.29793e-10
				Rnf223	1.99001	2.31333e-10
				Rgmb	-1.79698	2.32977e-10
				Med14	-1.39592	2.33401e-10
				Fem1b	-1.17374	2.33443e-10
				1810055G02Rik	1.79355	2.33443e-10
				Gstk1	-2.37455	2.33443e-10
				Mad2l2	1.3936	2.33756e-10
				Jag2	-1.57113	2.33756e-10
				6230424C14Rik	-1.92342	2.34318e-10
				Klhdc8a	2.87918	2.3512e-10
				Mettl3	-1.21848	2.35897e-10
				Zfp444	-1.81808	2.3689e-10
				Urm1	1.25242	2.38803e-10
				Gm38485	3.25601	2.38805e-10
				Tmem248	1.70435	2.38939e-10
				Tor1aip2	1.2627	2.3922e-10
				Bag3	1.5059	2.3922e-10
				Zfand2a	1.79466	2.3922e-10
				Fam73a	-1.54878	2.3922e-10
				Slc25a45	-1.27148	2.39339e-10
				Frrs1	2.51859	2.39339e-10
				Gdpd1	-1.36723	2.39674e-10
				Rbms3	-1.38234	2.39674e-10
				Higd1a	1.11546	2.39674e-10
				Dnase2b	-3.0911	2.39674e-10
				Gimap4	-2.02599	2.3993e-10
				Invs	-3.62928	2.40463e-10
				Tpcn1	-1.89757	2.40826e-10
				Coa4	-2.27759	2.41575e-10
				Amt	-2.95918	2.41984e-10
				Rcl1	1.2109	2.42684e-10
				Zscan30	-3.18468	2.42684e-10
				BC030308	-2.53997	2.42684e-10
				Dlg2	-2.77991	2.44163e-10
				S100a8	4.36388	2.445e-10
				Reep6	-3.2677	2.445e-10
				Ids	-1.28974	2.45042e-10
				Mtbp	1.4912	2.45469e-10
				1110034G24Rik	-1.67431	2.47025e-10
				Hhipl1	2.84042	2.47136e-10
				Fmod	-2.32733	2.47428e-10
				Fhl1	-1.4239	2.48161e-10
				Gm20627	-3.0448	2.48212e-10
				Tprn	1.62167	2.48212e-10
				4931423N10Rik	4.85241	2.4855e-10
				Cenpl	1.41536	2.48815e-10
				Tcp11	-1.99644	2.50839e-10
				Sdhaf1	1.3604	2.50877e-10
				Ctage5	1.00686	2.51784e-10
				Idh2	-1.99731	2.53409e-10
				Erich3	-2.81327	2.55841e-10
				Mmp3	4.25487	2.56667e-10
				Wfdc17	5.19326	2.5938e-10
				Sox2	-3.14878	2.5938e-10
				Fxyd5	1.79001	2.59989e-10
				Mpp6	1.83712	2.60195e-10
				Psma7	1.33932	2.60195e-10
				Ly6g6e	-2.43046	2.60705e-10
				Nrcam	1.67779	2.60972e-10
				Cacnb1	-2.22844	2.61481e-10
				Gm32742	-2.83943	2.61808e-10
				Efr3b	1.95341	2.6216e-10
				A630081D01Rik	1.3952	2.6216e-10
				B430203I24Rik	-1.67802	2.63542e-10
				Catip	-2.66208	2.64453e-10
				Ubr3	1.22254	2.64932e-10
				Sez6l	2.30311	2.66033e-10
				Tarsl2	-1.78562	2.66222e-10
				Acvrl1	-2.56311	2.66526e-10
				Pira7	2.46299	2.66611e-10
				Gchfr	-2.91568	2.67582e-10
				Frem2	-2.94492	2.67657e-10
				Msantd1	1.8958	2.68309e-10
				Pkn3	-1.67839	2.68309e-10
				Nat6	-2.25797	2.68598e-10
				Ptpn1	1.2391	2.70092e-10
				Tbrg1	1.61768	2.70092e-10
				P3h2	-2.0771	2.71483e-10
				Bmp8b	3.37409	2.71483e-10
				Gm4285	2.11044	2.71483e-10
				Scrn2	-1.96414	2.7156e-10
				Prtn3	4.05914	2.72018e-10
				Car11	-2.88538	2.72269e-10
				Nsun4	-1.35542	2.73137e-10
				Tspan11	-3.43711	2.73137e-10
				Rnf4	1.23772	2.74549e-10
				Sirpb1a	3.9273	2.76858e-10
				Gm17597	-2.96309	2.77105e-10
				T2	-3.29875	2.77105e-10
				Gm39888	-3.60515	2.77105e-10
				Shroom4	-1.52106	2.78459e-10
				Fam161a	-3.10983	2.79111e-10
				A230057D06Rik	-2.82327	2.80018e-10
				Casc1	-1.98766	2.80076e-10
				Cnksr2	-5.09224	2.80247e-10
				Ccnk	1.20852	2.83286e-10
				Smarca2	-1.68937	2.85558e-10
				Atp1a2	-2.76072	2.86353e-10
				Gm10910	-1.49175	2.87831e-10
				Pgpep1	-1.41906	2.88479e-10
				Gm867	-2.36024	2.89698e-10
				Slc25a19	-1.14112	2.90103e-10
				Ube2d3	1.6805	2.90695e-10
				1700071A11Rik	1.55678	2.9232e-10
				Trim65	-2.68858	2.92442e-10
				Bin3	1.28598	2.92663e-10
				Mtg2	-1.51391	2.93504e-10
				Mir22hg	1.97436	2.93711e-10
				Kif13b	-1.0461	2.93796e-10
				Zmym3	-1.22072	2.93796e-10
				Amph	-1.7002	2.94657e-10
				Appl2	-1.26938	2.94657e-10
				Acp6	-1.55118	2.94798e-10
				Cmtm7	1.43336	2.95097e-10
				H2-Ab1	-1.41789	2.95337e-10
				Tnfrsf9	3.68201	2.95547e-10
				Dnajc6	-1.62852	2.9573e-10
				Nfkbia	2.12203	2.95835e-10
				Raet1c	6.1489	2.9631e-10
				Gm14085	3.60485	2.97147e-10
				Zfp668	1.3504	2.97147e-10
				Crebl2	-2.54832	2.98952e-10
				Exoc3l	-1.93878	2.99804e-10
				C5ar2	2.75754	3.00326e-10
				Sel1l3	-2.25961	3.01371e-10
				Prr7	2.37865	3.01627e-10
				Grem2	-2.7514	3.02725e-10
				Adcy9	-1.74952	3.04544e-10
				Ryr3	-3.45534	3.04835e-10
				Pcdh7	3.51695	3.04835e-10
				Adamts12	2.99017	3.0492e-10
				Tapbp	1.50562	3.05324e-10
				Btbd2	-1.78043	3.05324e-10
				Gm34168	2.13683	3.06244e-10
				Thbs3	-2.90932	3.0807e-10
				1700021N21Rik	-2.742	3.09103e-10
				Slc25a12	1.1213	3.1036e-10
				Calcoco1	-2.48846	3.10499e-10
				Daf2	-3.31235	3.10642e-10
				Snrpb2	1.25047	3.10642e-10
				Arpc1b	1.40898	3.13543e-10
				Ak2	1.25893	3.14317e-10
				Utp14b	2.05498	3.14624e-10
				H19	-4.82542	3.1495e-10
				Tspan7	-1.26692	3.15321e-10
				Gpr65	1.91142	3.15657e-10
				Gm6460	2.43436	3.15657e-10
				Ube2f	1.27381	3.15657e-10
				Bean1	3.79605	3.16015e-10
				6430590A07Rik	-1.29904	3.16103e-10
				Map3k4	-1.20067	3.17349e-10
				1600020E01Rik	1.21722	3.19356e-10
				Crtam	2.92758	3.19886e-10
				Hs6st1	1.12482	3.20567e-10
				Psma5	1.30512	3.20884e-10
				Chtop	1.17354	3.20899e-10
				Pon1	-6.65765	3.2314e-10
				Gm32139	-2.88242	3.23159e-10
				Adam5	-2.00158	3.25069e-10
				Lrp2	-4.62527	3.26381e-10
				Tbc1d9b	-1.33737	3.26381e-10
				1700026L06Rik	-2.25828	3.29103e-10
				Cblb	2.12426	3.31883e-10
				Zwint	1.33106	3.31883e-10
				Hic1	2.14095	3.31883e-10
				Chka	1.69984	3.32829e-10
				Sgsm2	-1.78441	3.332e-10
				Creg1	-1.02057	3.34364e-10
				Esrrg	-3.35553	3.35077e-10
				Cstf1	1.47042	3.35476e-10
				Radil	-1.96463	3.36858e-10
				Acad11	-2.38934	3.37098e-10
				Aspa	-2.18076	3.38444e-10
				Krt18	1.4894	3.38658e-10
				Ccdc47	-1.70623	3.39463e-10
				Ermp1	-1.39501	3.39727e-10
				Bak1	1.61857	3.40262e-10
				4930556M19Rik	-1.84798	3.40262e-10
				Plekha8	1.69353	3.40704e-10
				Map9	-1.29917	3.40704e-10
				2610203C22Rik	-2.40386	3.40755e-10
				1700080G18Rik	2.62014	3.40908e-10
				Gm5544	3.56548	3.41894e-10
				Tbc1d19	-1.50176	3.41894e-10
				Tppp3	-2.99498	3.41894e-10
				Mcee	-1.88648	3.41932e-10
				Gmps	1.77715	3.42185e-10
				Wdr1	1.21621	3.42804e-10
				Ppp1r7	1.14127	3.42905e-10
				Trim36	-1.84554	3.4461e-10
				Iqcd	-1.38569	3.4461e-10
				Snrpe	1.09153	3.45197e-10
				Denr	1.61544	3.46649e-10
				Ccdc28a	-1.49198	3.49132e-10
				Nol12	1.58828	3.50716e-10
				Zfp459	-3.37937	3.50716e-10
				Inhbb	3.3983	3.51897e-10
				Tuft1	1.95995	3.52203e-10
				B430306N03Rik	3.66732	3.53411e-10
				9530083O12Rik	-1.7605	3.53464e-10
				Ppm1b	-1.48555	3.54892e-10
[truncated: 6,025 more rows]
